# Supplementary material
Source: PubMed Central journal article supplement (PMC9617144)

# Arene radiofluorination enabled by photoredox-mediated halide interconversion

Wei Chen<sup>1</sup>, Hui Wang<sup>1</sup>, Nicholas E. S. Tay<sup>2</sup>, Vincent A. Pistrutto<sup>2</sup>, Kang-Po Li<sup>1</sup>, Tao Zhang<sup>1</sup>, Zhanhong Wu<sup>1</sup>, David A. Nicewicz<sup>2\*</sup>, Zibo Li<sup>1\*</sup>

<sup>1</sup>Biomedical Research Imaging Center, Department of Radiology, and UNC Lineberger Comprehensive Cancer Center, University of North Carolina- Chapel Hill, Chapel Hill, NC 27514, USA.

<sup>2</sup>Department of Chemistry, University of North Carolina at Chapel Hill, Chapel Hill, North Carolina, 27599-3290, United States

Correspondence to: nicewicz@unc.edu; ziboli@med.unc.edu

## This PDF file includes:

|                                                                                         |     |
|-----------------------------------------------------------------------------------------|-----|
| 1. General information                                                                  | 2   |
| 2. Preparation of arene substrates and fluoroarene standards                            | 2   |
| 3. Radiolabeling experiments                                                            | 53  |
| 3.1 Reagents and equipment information                                                  | 53  |
| 3.2 General procedure for the preparation of [ <sup>18</sup> F]TBAF                     | 54  |
| 3.3 General HPLC conditions                                                             | 54  |
| 3.4 General procedure for photoredox-mediated halide/ <sup>18</sup> F interconversion   | 55  |
| 3.5 Radio-HPLC analysis and characterization of <sup>18</sup> F-labeled arenes          | 57  |
| 3.6 General procedure for deprotection of <sup>18</sup> F-labeled tyrosine derivatives  | 139 |
| 3.7 <sup>18</sup> F-labeling of DOPAs via halide/ <sup>18</sup> F interconversion       | 147 |
| 3.8 Small scale synthesis [ <sup>18</sup> F]FDOPA from preformed [ <sup>18</sup> F]TBAF | 155 |
| 3.9 Scale-up synthesis of [ <sup>18</sup> F]FDOPA from [ <sup>18</sup> F]F <sup>-</sup> | 157 |
| 3.10 Molar activity calculation                                                         | 160 |
| 3.11 Less effective substrates for halide/ <sup>18</sup> F interconversion              | 162 |
| 4. Positron emission tomography (PET) imaging study                                     | 163 |
| 5. Reference                                                                            | 166 |
| 6. NMR spectra ( <sup>1</sup> H NMR, <sup>13</sup> C NMR, <sup>19</sup> F NMR)          | 168 |

## 1. General information

**Methods and materials:** Commercially available chemicals reagents and solvents were purchased from Sigma-Aldrich, Alfa Aesar, TCI, Acros, Combi-Blocks, Matrix Scientific, Oakwood Chemical, Chem Impex International, and Fisher Scientific etc. and used as received.

Anhydrous acetonitrile (MeCN), dichloromethane (DCM), tetrahydrofuran (THF) and dimethylformamide (DMF) were dried by an Inert solvent purification system (PS-MD-5).

Nuclear magnetic resonance spectra were obtained using a Varian 400 MR or Inova 500 spectrometers. <sup>1</sup>H NMR and <sup>13</sup>C NMR spectra are referenced to Chloroform-d (<sup>1</sup>H NMR: 7.26 ppm and <sup>13</sup>C NMR: 77.00 ppm), Dimethyl sulfoxide-d<sub>6</sub> (<sup>1</sup>H NMR: 2.50 ppm and <sup>13</sup>C NMR: 39.63 ppm), D<sub>2</sub>O (<sup>1</sup>H NMR: 4.79 ppm). All spectra are reported as parts per million. <sup>1</sup>H, <sup>13</sup>C, and <sup>19</sup>F NMR data are reported as follows: chemical shift (ppm), multiplicity (s = singlet, d = doublet, t = triplet, q = quartet, quint = quintet, dd = doublet of doublets, td = triplet of doublets, ddd = doublet of doublet of doublets, m = multiples, app = apparent), coupling constants (Hz), and integration.

High Resolution Mass Spectra (HRMS) were analysed on either ThermoFisher GC Exactive with an Electron Ionization (EI) source or ThermoFisher Q Exactive HF-X (ThermoFisher, Bremen, Germany) mass spectrometer with positive mode electrospray ionization (ESI).

Reverse-phase flash liquid chromatography was performed using a Biotage® Isolera One instrument with a Biotage® SNAP Ultra C18 cartridge.

## 2. Preparation of arene substrates and fluoroarene standards

Compounds 1-chloro-4-methoxybenzene (**1-Cl**), 1-bromo-4-methoxybenzene (**1-Br**), 1-iodo-4-methoxybenzene (**1-I**), 1-fluoro-4-methoxybenzene (**1-F**), 1-methoxy-4-nitrobenzene (**1-NO<sub>2</sub>**), 4-methoxyphenyl trifluoromethanesulfonate (**1-OTf**), 1-bromo-4-(tert-butoxy)benzene (**5-Br**), 4-chloro-1-methoxy-2-methylbenzene (**6**), 4-fluoro-1-methoxy-2-methylbenzene, 1-chloro-4-methoxy-2-methylbenzene (**7**), 1-fluoro-4-methoxy-2-methylbenzene, 1-bromo-2,4-dimethoxybenzene (**10-Br**), 1-iodo-2,4-dimethoxybenzene (**10-I**), 2,4-dimethoxy-1-nitrobenzene (**10-NO<sub>2</sub>**), 1-fluoro-2,4-dimethoxybenzene, 1-chloro-2-methoxybenzene (**17**), 1-fluoro-2-methoxybenzene, 1-chloronaphthalene (**21-Cl**), 1-fluoronaphthalene (**21-F**), 5-chloro-2,3,3-trimethyl-3H-indole (**30-Cl**), 4-fluorobenzo[b]thiophene (**33**), 3-bromo-2,6-dimethoxypyridine (**35**), 6-fluorochroman-4-one (**36**), Clifofibrate (**43**), fluorouracil (**53**), methyl (S)-2-((tert-butoxycarbonyl)amino)-3-(3,4-dimethoxyphenyl)propanoate (**L-64**) and other unlabeled reagents were purchased and used directly.

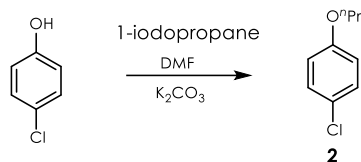

**1-chloro-4-propoxybenzene (2).** To a solution of the 4-chlorophenol (386 mg, 3 mmol, 1.5 equiv.) in DMF was added anhydrous potassium carbonate (829 mg, 6 mmol, 3 equiv.) followed by the 1-iodopropane (340 mg, 2 mmol, 1 equiv.). The reaction was stirred under room temperature overnight and then extracted with ethyl acetate and water. The organic phase was washed with water, NaOH solution (10%, w/w), water, saturated brine, dried with  $\text{Na}_2\text{SO}_4$ , filtered, and concentrated in vacuo to give the title compound as a colorless liquid (310 mg, 91%) which was used without further purification. Spectral data matched literature data<sup>1</sup>

**$^1\text{H}$  NMR (400 MHz,  $\text{CDCl}_3$ )**  $\delta$  7.25 – 7.18 (m, 2H), 6.86 – 6.78 (m, 2H), 3.89 (t,  $J$  = 6.6 Hz, 2H), 1.87 – 1.73 (m, 2H), 1.03 (t,  $J$  = 7.4 Hz, 3H).

**$^{13}\text{C}$  NMR (100 MHz,  $\text{CDCl}_3$ )**  $\delta$  157.72, 129.22, 125.25, 115.74, 69.79, 22.51, 10.46.

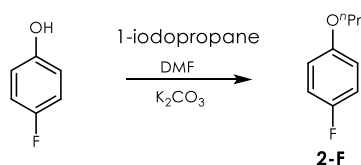

**1-fluoro-4-propoxybenzene (2-F).** Follow the preparation procedure of compound **2**, the title compound was obtained as a colorless liquid (305 mg, 66%) from 4-fluorophenol and 1-iodopropane.

**$^1\text{H}$  NMR (400 MHz,  $\text{CDCl}_3$ )**  $\delta$  7.03 – 6.91 (m, 2H), 6.89 – 6.77 (m, 2H), 3.88 (t,  $J$  = 6.6 Hz, 2H), 1.86 – 1.73 (m, 2H), 1.03 (t,  $J$  = 7.4 Hz, 3H).

**$^{13}\text{C}$  NMR (100 MHz,  $\text{CDCl}_3$ )**  $\delta$  157.09 (d,  $J$  = 237 Hz), 155.23 (d,  $J$  = 2.1 Hz), 115.68 (d,  $J$  = 23 Hz), 115.40 (d,  $J$  = 8 Hz), 70.13, 22.59, 10.48.

**$^{19}\text{F}$  NMR (376 MHz,  $\text{CDCl}_3$ )**  $\delta$  -124.53 (ddd,  $J$  = 12.5, 8.3, 4.4 Hz).

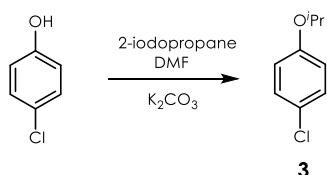

**1-chloro-4-isopropoxybenzene (3).** Follow the preparation procedure of compound **2**, the title compound was obtained as a colorless liquid (135 mg, 40%) from 4-chlorophenol and 2-iodopropane.

**<sup>1</sup>H NMR (400 MHz, CDCl<sub>3</sub>)** δ 7.24 – 7.17 (m, 2H), 6.84 – 6.78 (m, 2H), 4.49 (septet, J = 6.0 Hz, 1H), 1.32 (d, J = 6.0 Hz, 6H).

**<sup>13</sup>C NMR (100 MHz, CDCl<sub>3</sub>)** δ 156.46, 129.29, 125.24, 117.17, 70.32, 21.92.

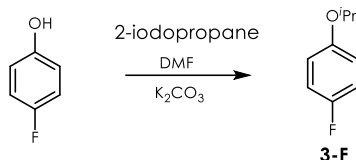

**1-fluoro-4-isopropoxybenzene(3-F).** Follow the preparation procedure of compound **2**, the title compound was obtained as a colorless liquid from 4-fluorophenol and 2-iodopropane. Spectral data matched literature data<sup>2</sup>

**<sup>1</sup>H NMR (400 MHz, CDCl<sub>3</sub>)** δ 7.00 – 6.89 (m, 2H), 6.87 – 6.78 (m, 2H), 4.45 (septet, J = 6 Hz, 1H), 1.31 (d, J = 6.0 Hz, 6H).

**<sup>13</sup>C NMR (100 MHz, CDCl<sub>3</sub>)** δ 157.14 (d, J = 237 Hz), 153.92 (d, J = 2.1 Hz), 117.21 (d, J = 8.0 Hz), 115.75 (d, J = 23 Hz), 70.85, 22.00.

**<sup>19</sup>F NMR (376 MHz, CDCl<sub>3</sub>)** δ -124.11 (tt, J = 8.5, 4.5 Hz).

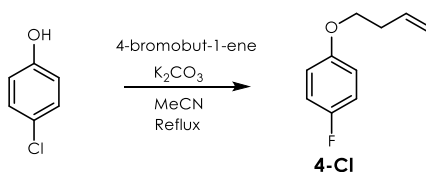

**1-(but-3-en-1-yloxy)-4-chlorobenzene (4-Cl).** To a solution of 4-chlorophenol (257 mg, 2 mmol) in MeCN were added 4-Bromobut-1-ene (540 mg, 4 mmol, 2 equiv.) and potassium carbonate (553 mg, 4 mmol, 2 equiv.). The mixture was stirred under reflux for overnight. The reaction was condensed under reduced pressure and extracted with ethyl acetate and water. The organic phase was washed with NaOH solution (10%, w/w), water, saturated brine, dried with Na<sub>2</sub>SO<sub>4</sub>, filtered, and concentrated in vacuo and purified by silica gel column with hexane as the eluant to give the title compound as colorless liquid (149 mg, 41%).

**<sup>1</sup>H NMR (400 MHz, CDCl<sub>3</sub>)** δ 7.25 – 7.20 (m, 2H), 6.86 – 6.79 (m, 2H), 5.89 (ddt, J = 17.0, 10.3, 6.7 Hz, 1H), 5.17 (ddd, J = 17.2, 3.2, 1.6 Hz, 1H), 5.14 – 5.09 (m, 1H), 3.98 (t, J = 6.7 Hz, 2H), 2.53 (qt, J = 6.7, 1.3 Hz, 2H).

**<sup>13</sup>C NMR (100 MHz, CDCl<sub>3</sub>)** δ 157.49, 134.20, 129.27, 125.51, 117.16, 115.82, 67.50, 33.54.

**HRMS (EI):** Calculated for C<sub>10</sub>H<sub>11</sub>ClO [M]<sup>+</sup>: 182.0498; found: 182.0493.

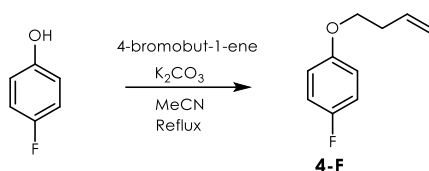

**1-(but-3-en-1-yloxy)-4-fluorobenzene (4-F).** Follow the preparation procedure of compound **4-Cl**, the title compound (**4-F**) was obtained as a colorless liquid (158 mg, 48%).

**<sup>1</sup>H NMR (400 MHz, CDCl<sub>3</sub>)** δ 7.05 – 6.90 (m, 2H), 6.88 – 6.79 (m, 2H), 5.90 (ddt, *J* = 17.0, 10.3, 6.7 Hz, 1H), 5.17 (ddd, *J* = 17.2, 3.2, 1.6 Hz, 1H), 5.14 – 5.08 (m, 1H), 3.98 (t, *J* = 6.7 Hz, 2H), 2.53 (qt, *J* = 6.7, 1.3 Hz, 2H).

**<sup>13</sup>C NMR (100 MHz, CDCl<sub>3</sub>)** δ 157.21 (d, *J* = 238.0 Hz), 154.99 (d, *J* = 2.1 Hz), 134.33, 117.06, 115.73 (d, *J* = 23.1 Hz), 115.53 (d, *J* = 7.9 Hz), 67.86, 33.64.

**<sup>19</sup>F NMR (376 MHz, CDCl<sub>3</sub>)** δ -124.12 – -124.26 (m).

**HRMS (EI):** Calculated for C<sub>10</sub>H<sub>11</sub>FO [M]<sup>+</sup>: 166.0794; found: 166.0789.

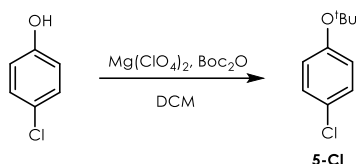

**1-(tert-butoxy)-4-chlorobenzene (5-Cl).** The title compound was prepared from reported method<sup>3</sup>. To a solution of 4-chlorophenol (2mmol) and Mg(ClO<sub>4</sub>)<sub>2</sub> (45 mg, 0.2mmol, 10%) in dichloromethane was added Boc<sub>2</sub>O (4.6 mmol, 1.0 g, 2.3 equiv.). The resulting solution was heated at 40°C overnight. The solvent was removed under reduce pressure. The residue was extracted with EA and water. The organic phase was washed with 1N HCl, 10% NaOH solution, water, saturated brine in sequence, dried with Na<sub>2</sub>SO<sub>4</sub>, filtered and concentrated in vacuo to give the product as a colorless liquid (172mg, 47%) which was used without further purification. Spectral data matched literature data<sup>4</sup>.

**<sup>1</sup>H NMR (400 MHz, CDCl<sub>3</sub>)** δ 7.25 – 7.19 (m, 2H), 6.96 – 6.88 (m, 2H), 1.33 (s, 9H).

**<sup>13</sup>C NMR (100 MHz, CDCl<sub>3</sub>)** δ 153.94, 128.85, 128.54, 125.44, 78.90, 28.73.

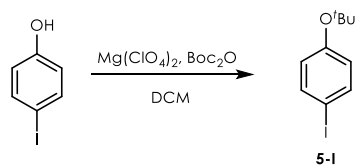

**1-(tert-butoxy)-4-iodobenzene(5-I).** Follow the same preparation procedure of 1-(tert-butoxy)-4-chlorobenzene(**4-Cl**), the title compound was obtained as a white solid (278 mg, 50%) from

4-iodophenol and purified by silica gel column with ethyl acetate/ hexane (1/20) as the eluant. Spectral data matched literature data<sup>5</sup>.

**<sup>1</sup>H NMR (400 MHz, CDCl<sub>3</sub>)** δ 7.59 – 7.51 (m, 2H), 6.79 – 6.70 (m, 2H), 1.33 (s, 9H).

**<sup>13</sup>C NMR (100 MHz, CDCl<sub>3</sub>)** δ 155.33, 137.87, 126.34, 86.71, 78.96, 28.75.

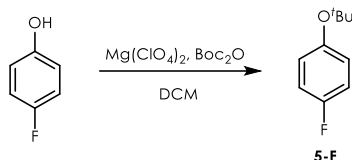

**1-(tert-butoxy)-4-fluorobenzene (5-F)**. The title compound was prepared from the reported literature. Spectral data matched literature data<sup>3</sup>

**<sup>1</sup>H NMR (400 MHz, CDCl<sub>3</sub>)** δ 6.95 (d,  $J = 0.5$  Hz, 2H), 6.93 (s, 2H), 1.31 (s, 9H).

**<sup>13</sup>C NMR (100 MHz, CDCl<sub>3</sub>)** δ 159.08 (d,  $J = 240$  Hz), 151.07 (d,  $J = 2.7$  Hz), 125.53 (d,  $J = 8.3$  Hz), 115.24 (d,  $J = 22.7$  Hz), 78.52 (d,  $J = 1.1$  Hz), 28.67.

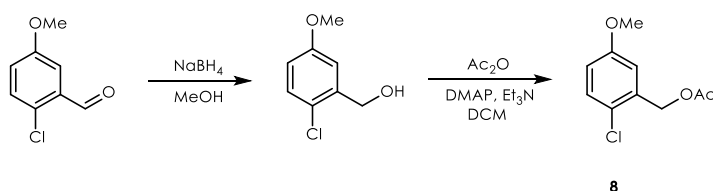

**2-chloro-5-methoxybenzyl acetate (8)**. To a solution of 2-chloro-5-methoxybenzaldehyde (340 mg, 2 mmol, 1 equiv.) in methanol was added  $\text{NaBH}_4$  (152 mg, 4 mmol, 2 equiv.) portion-wise. The reaction was stirred under room temperature for 1h and then quenched by the addition of 1N HCl solution. The mixture was extracted with ethyl acetate and water. The organic phase was washed with saturated brine, dried with  $\text{Na}_2\text{SO}_4$ , filtered, and concentrated in vacuo to give the crude intermediate which was then dissolved in dichloromethane followed by the addition of DMAP (12 mg, 0.2 mmol, 0.05 equiv.), triethyl amine (558  $\mu\text{l}$ , 4 mmol, 2 equiv.) acetic anhydride (284  $\mu\text{l}$ , 3 mmol, 1.5 equiv.). The mixture was stirred under room temperature for 2h. Solvent was removed under reduce pressure. The residue was extracted with ethyl acetate and water. The organic phase was washed with 1N HCl, water, saturated brine, dried with  $\text{Na}_2\text{SO}_4$ , filtered, and concentrated in vacuo to give the title compound as a colorless liquid in 86% yield (370 mg) which was used without further purification.

**<sup>1</sup>H NMR (400 MHz, CDCl<sub>3</sub>)** δ 7.28 (d,  $J = 8.8$  Hz, 1H), 6.95 (d,  $J = 3.0$  Hz, 1H), 6.80 (dd,  $J = 8.8, 3.0$  Hz, 1H), 5.17 (s, 2H), 3.80 (s, 3H), 2.14 (s, 3H).

**<sup>13</sup>C NMR (100 MHz, CDCl<sub>3</sub>)** δ 170.59, 158.35, 134.47, 130.18, 124.72, 115.32, 114.65, 63.60, 55.53, 20.86.

**HRMS (EI)**: Calculated for  $\text{C}_{10}\text{H}_{11}\text{ClO}_3$   $[\text{M}]^+$ : 214.0397; found: 214.0392.

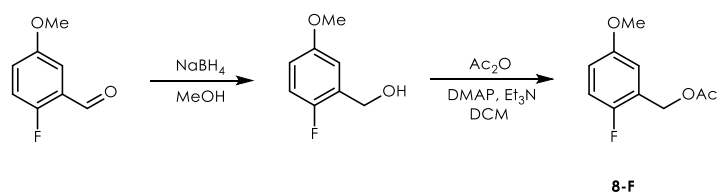

**2-fluoro-5-methoxybenzyl acetate (8-F).** Follow the preparation procedure of compound **8**, the title compound was obtained as a colorless oil (322 mg, 81%) from 2-fluoro-5-methoxybenzaldehyde.

**<sup>1</sup>H NMR (400 MHz, CDCl<sub>3</sub>)** δ 6.99 (t, *J* = 9.1 Hz, 1H), 6.89 (dd, *J* = 5.8, 3.2 Hz, 1H), 6.84 – 6.78 (m, 1H), 5.13 (s, 2H), 3.78 (s, 3H), 2.11 (d, *J* = 3.2 Hz, 3H).

**<sup>13</sup>C NMR (100 MHz, CDCl<sub>3</sub>)** δ 170.69, 155.59 (d, *J* = 2.1 Hz), 155.23 (d, *J* = 239.6 Hz), 123.64 (d, *J* = 16.4 Hz), 115.98 (d, *J* = 23 Hz), 115.28 (d, *J* = 3.7 Hz), 114.90 (d, *J* = 8.0 Hz), 60.21 (d, *J* = 3.9 Hz), 55.76, 20.88.

**<sup>19</sup>F NMR (376 MHz, CDCl<sub>3</sub>)** δ -129.10 (ddd, *J* = 9.6, 5.6, 4.3 Hz).

**HRMS (EI):** Calculated for C<sub>10</sub>H<sub>11</sub>FO<sub>3</sub> [M]<sup>+</sup>: 198.0692; found: 198.0687.

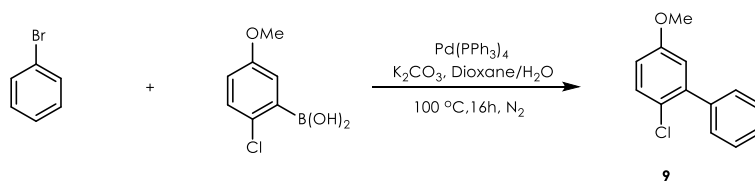

**2-chloro-5-methoxy-1,1'-biphenyl (9).** Bromobenzene (0.63 g, 4 mmol, 1.0 equiv.) was weighed in a 100 ml flask with a stir bar. (2-chloro-5-methoxyphenyl)boronic acid (1.83 g, 6 mmol, 1equiv.), potassium carbonate (1.66 g, 12 mmol, 3 equiv.), Pd(PPh<sub>3</sub>)<sub>4</sub> (462 mg, 0.4 mmol, 0.1 equiv.) were added in sequence. Dioxane and H<sub>2</sub>O (3:1, 60 ml) was then added. Vacuumize and refill the mixture with N<sub>2</sub> three times while stirring. The reaction was heated under 100 °C for 16 h under N<sub>2</sub>. Most of the solvent was then removed under reduced pressure before ethyl acetate (100 mL) was added to the residue. The solution was passed through a pile of Celatom. Wash the Celatom with additional ethyl acetate (50 mL). The filtration was extracted with water and the organic phase was separated and washed with saturated brine, dried over with Na<sub>2</sub>SO<sub>4</sub>, filtered and concentrated in vacuo to give crude product which was purified by silica gel column with hexane as the eluant to give the title compound as colorless oil (763 mg, 87%).

**<sup>1</sup>H NMR (400 MHz, CDCl<sub>3</sub>)** δ 7.50 – 7.43 (m, 4H), 7.43 – 7.39 (m, 1H), 7.38 (d, *J* = 8.8 Hz, 1H), 6.90 (d, *J* = 3.0 Hz, 1H), 6.85 (dd, *J* = 8.7, 3.1 Hz, 1H), 3.82 (s, 3H).

**<sup>13</sup>C NMR (100 MHz, CDCl<sub>3</sub>)** δ 158.18, 141.27, 139.45, 130.55, 129.31, 128.02, 127.65, 123.87, 116.53,

114.30, 55.54.

**HRMS (EI):** Calculated for C<sub>13</sub>H<sub>11</sub>ClO [M]<sup>+</sup>: 218.0498; found: 202.0493.

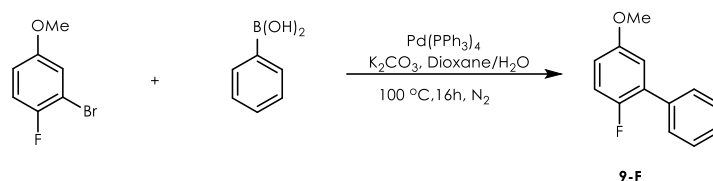

**2-fluoro-5-methoxy-1,1'-biphenyl(9-F).** 2-bromo-1-fluoro-4-methoxybenzene (205 mg, 1 mmol, 1.0 equiv.) was weighed in a 100 ml flask with a stir bar. Phenylboronic acid (183 mg, 1.5 mmol, 1 equiv.), potassium carbonate (414 mg, 3 mmol, 3 equiv.), Pd(PPh<sub>3</sub>)<sub>4</sub> (58 mg, 0.05 mmol, 0.05 equiv.) were added in sequence. Dioxane and H<sub>2</sub>O (3:1, 60 ml) was then added. Vacuumize and refill the mixture with N<sub>2</sub> three times while stirring. The reaction was heated under 100 °C for 16h under N<sub>2</sub>. Most of the solvent was then removed under reduced pressure. Ethyl acetate(100ml) was added to the residue. The solution was passed through a pile of Celatom. Washed the Celatom with additional ethyl acetate (50 ml). The filtration was extracted with water and the organic phase was separated and washed with saturated brine, dried over with Na<sub>2</sub>SO<sub>4</sub>, filtered and concentrated in vacuo to give crude product which was purified by silica gel column with ethyl acetate/ hexane (1/20) as the eluant to give the title compound as colorless oil (176 mg, 87%).

**<sup>1</sup>H NMR (400 MHz, CDCl<sub>3</sub>)** δ 7.60 – 7.52 (m, 2H), 7.49 – 7.42 (m, 2H), 7.42 – 7.34 (m, 1H), 7.08 (dd, *J* = 9.8, 9.1 Hz, 1H), 6.96 (dd, *J* = 6.3, 3.2 Hz, 1H), 6.84 (dt, *J* = 8.9, 3.5 Hz, 1H), 3.83 (s, 3H).

**<sup>13</sup>C NMR (100 MHz, CDCl<sub>3</sub>)** δ 155.73 (d, *J* = 2.2 Hz), 154.16 (d, *J* = 239 Hz), 135.85 (d, *J* = 1.4 Hz), 129.55 (d, *J* = 15.2 Hz), 128.95 (d, *J* = 3.0 Hz), 128.41, 127.74, 116.57(d, *J* = 24.7 Hz), 115.46 (d, *J* = 3.3 Hz), 113.83 (d, *J* = 8.1 Hz), 55.79.

**<sup>19</sup>F NMR (376 MHz, CDCl<sub>3</sub>)** δ -128.96(m).

**HRMS (EI):** Calculated for C<sub>13</sub>H<sub>11</sub>FO [M]<sup>+</sup>: 202.0794; found: 202.0789.

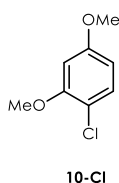

**1-chloro-2,4-dimethoxybenzene(10-Cl).** The title compound was prepared from reported literature<sup>6</sup>.

**<sup>1</sup>H NMR (400 MHz, CDCl<sub>3</sub>)** δ 7.24 (d, *J* = 8.7 Hz, 1H), 6.50 (d, *J* = 2.7 Hz, 1H), 6.43 (dd, *J* = 8.7, 2.7 Hz, 1H), 3.87 (s, 3H), 3.79 (s, 3H).

**<sup>13</sup>C NMR (100 MHz, CDCl<sub>3</sub>)** δ 159.44, 155.57, 130.08, 114.09, 105.11, 99.97, 56.01, 55.53.



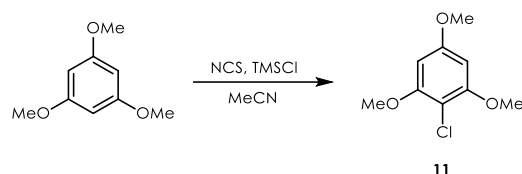

**2-chloro-1,3,5-trimethoxybenzene (11).** The title compound was prepared from the reported literature procedure and further purified by stirring in methanol to remove the dechlorinated byproduct. Spectral data matched literature data<sup>7</sup>

**<sup>1</sup>H NMR (400 MHz, CDCl<sub>3</sub>)** δ 6.18 (s, 2H), 3.88 (s, 6H), 3.81 (s, 3H).

**<sup>13</sup>C NMR (100 MHz, CDCl<sub>3</sub>)** δ 159.39, 156.52, 102.68, 91.57, 56.28, 55.52.

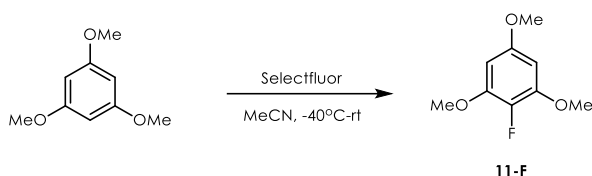

**2-fluoro-1,3,5-trimethoxybenzene (11-F).** The title compound was prepared from reported literature<sup>8</sup>.

**<sup>1</sup>H NMR (400 MHz, CDCl<sub>3</sub>)** δ 6.16 (d, *J* = 6.2 Hz, 2H), 3.87 (s, 6H), 3.78 (s, 3H).

**<sup>13</sup>C NMR (100 MHz, CDCl<sub>3</sub>)** δ 155.50 (d, *J* = 3.0 Hz), 148.59 (d, *J* = 9.2 Hz), 137.71 (d, *J* = 235.9 Hz), 92.23, 56.53, 55.65.

**<sup>19</sup>F NMR (376 MHz, CDCl<sub>3</sub>)** δ -168.37 (t, *J* = 6.1 Hz).

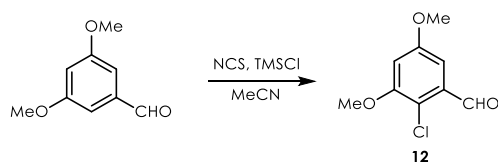

**2-chloro-3,5-dimethoxybenzaldehyde (12).** The title compound was prepared from reported chlorination method<sup>7</sup>. The crude solid product after work-up was purified by stirring in methanol. The title compound was obtained as a white solid after filtration.

**<sup>1</sup>H NMR (400 MHz, CDCl<sub>3</sub>)** δ 10.49 (s, 1H), 7.01 (d, *J* = 2.7 Hz, 1H), 6.73 (d, *J* = 2.8 Hz, 1H), 3.91 (s, 3H), 3.84 (s, 3H).

**<sup>13</sup>C NMR (100 MHz, CDCl<sub>3</sub>)** δ 189.89, 159.07, 156.29, 133.52, 119.59, 106.00, 102.36, 56.50, 55.80.

**HRMS (EI):** Calculated for C<sub>9</sub>H<sub>9</sub>ClO<sub>3</sub> [M]<sup>+</sup>: 200.0240; found: 200.0233.

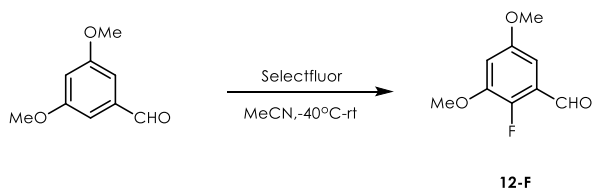

**2-fluoro-3,5-dimethoxybenzaldehyde (12-F)**. The title compound was prepared from the same procedure of **11-F**. The product was separated as a white solid which contains ~20% non-fluorinated starting material.

**<sup>1</sup>H NMR (400 MHz, CDCl<sub>3</sub>)** δ 10.37 (s, 1H), 6.83 (dd, *J* = 4.1, 3.1 Hz, 1H), 6.77 (dd, *J* = 7.2, 3.0 Hz, 1H), 3.90 (s, 3H), 3.82 (s, 3H).

**<sup>13</sup>C NMR (100 MHz, CDCl<sub>3</sub>)** δ 171.13, 155.82, 155.53 (d, *J* = 2.0 Hz), 155.39 (d, *J* = 238 Hz), 153.42, 132.65, 130.17, 129.83, 129.30, 124.86 (d, *J* = 16.5 Hz), 124.00, 123.37, 119.11, 118.48, 115.70 (d, *J* = 3.8 Hz), 115.46 (d, *J* = 23.9 Hz), 114.50 (d, *J* = 8.0 Hz), 55.63, 44.85 (d, *J* = 3.1 Hz), 22.11.

**<sup>19</sup>F NMR (376 MHz, CDCl<sub>3</sub>)** δ -154.06 (dd, *J* = 7.3, 4.1 Hz).

**HRMS (EI)**: Calculated for C<sub>9</sub>H<sub>9</sub>FO<sub>3</sub> [M]<sup>+</sup>: 184.0536; found: 184.0531.

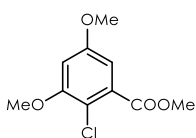

**13**

**methyl 2-chloro-3,5-dimethoxybenzoate (13)**. The title compound was obtained as a colorless oil from the reported chlorination method<sup>7</sup> and purified by flash LC with ethyl acetate/ hexane.

**<sup>1</sup>H NMR (400 MHz, CDCl<sub>3</sub>)** δ 6.84 (d, *J* = 2.8 Hz, 1H), 6.61 (d, *J* = 2.8 Hz, 1H), 3.92 (s, 3H), 3.88 (s, 3H), 3.81 (s, 3H).

**<sup>13</sup>C NMR (100 MHz, CDCl<sub>3</sub>)** δ 166.50, 158.57, 156.35, 132.12, 113.94, 105.80, 102.80, 56.45, 55.69, 52.51.

**HRMS (EI)**: Calculated for C<sub>10</sub>H<sub>11</sub>ClO<sub>4</sub> [M]<sup>+</sup>: 230.0346; found: 230.0340.

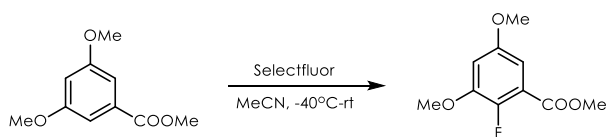

**13-F**

**methyl 2-fluoro-3,5-dimethoxybenzoate (13-F)**. The title compound was prepared from the same procedure as **11-F**. white solid was obtained (68 mg, 16%).

**<sup>1</sup>H NMR (400 MHz, CDCl<sub>3</sub>)** δ 6.90 (dd, *J* = 4.5, 3.1 Hz, 1H), 6.69 (dd, *J* = 6.6, 3.1 Hz, 1H), 3.93 (s, 3H), 3.87 (s, 3H), 3.81 (s, 3H).

**<sup>13</sup>C NMR (100 MHz, CDCl<sub>3</sub>)** δ 164.99 (d, *J* = 3.3 Hz), 155.01 (d, *J* = 2.7 Hz), 149.12 (d, *J* = 12.3 Hz), 147.09 (d, *J* = 254.3 Hz), 118.76 (d, *J* = 8.7 Hz), 105.74 (d, *J* = 1.8 Hz), 104.05, 56.47, 55.75, 52.39.

**<sup>19</sup>F NMR (376 MHz, CDCl<sub>3</sub>)** δ -141.72 (dd, *J* = 6.4, 4.7 Hz).

**HRMS (EI)**: Calculated for C<sub>10</sub>H<sub>11</sub>FO<sub>4</sub> [M]<sup>+</sup>: 214.0641; found: 214.0636.

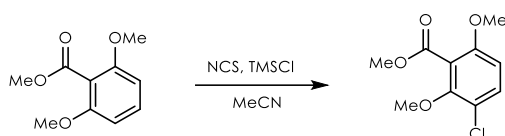

14

**methyl 3-chloro-2,6-dimethoxybenzoate (14).** The title compound was prepared from reported chlorination method<sup>7</sup>. The crude product was purified by silica gel column using ethyl acetate/ hexane (5% to 10%) to give the title compound as a white solid (190 mg, 83%).

**<sup>1</sup>H NMR (400 MHz, CDCl<sub>3</sub>)** δ 7.34 (d, *J* = 8.9 Hz, 1H), 6.64 (d, *J* = 8.9 Hz, 1H), 3.93 (s, 3H), 3.89 (s, 3H), 3.81 (s, 3H).

**<sup>13</sup>C NMR (100 MHz, CDCl<sub>3</sub>)** δ 165.81, 155.84, 153.62, 131.51, 119.84, 119.48, 107.73, 61.97, 56.26, 52.62.

**HRMS (EI):** Calculated for C<sub>10</sub>H<sub>11</sub>ClO<sub>4</sub> [M]<sup>+</sup>: 230.0346; found: 230.0342.

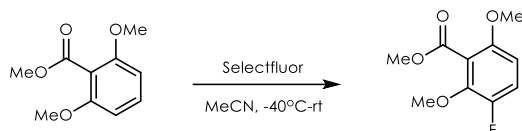

14-F

**methyl 3-fluoro-2,6-dimethoxybenzoate (14-F).** Follow the procedure to prepare compound **11-F**, the title compound was obtained as a colorless liquid (146 mg, 68%).

**<sup>1</sup>H NMR (400 MHz, CDCl<sub>3</sub>)** δ 7.06 (dd, *J* = 11.3, 9.1 Hz, 1H), 6.54 (dd, *J* = 9.1, 3.2 Hz, 1H), 3.94 (d, *J* = 2.1 Hz, 3H), 3.92 (s, 3H), 3.79 (s, 3H).

**<sup>13</sup>C NMR (100 MHz, CDCl<sub>3</sub>)** δ 165.64 (d, *J* = 3.4 Hz), 152.65 (d, *J* = 2.0 Hz), 149.50 (d, *J* = 241.0 Hz), 145.14 (d, *J* = 13.4 Hz), 118.58 (d, *J* = 2.4 Hz), 117.71 (d, *J* = 20.6 Hz), 105.78 (d, *J* = 7.2 Hz), 61.80 (d, *J* = 6.1 Hz), 56.34, 52.58.

**<sup>19</sup>F NMR (376 MHz, CDCl<sub>3</sub>)** δ -139.63 – -139.75 (m)

**HRMS (EI):** Calculated for C<sub>10</sub>H<sub>11</sub>FO<sub>4</sub> [M]<sup>+</sup>: 214.0641; found: 214.0638.

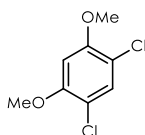

15

**1,5-dichloro-2,4-dimethoxybenzene (15).** The title compound was prepared from reported procedure. Spectral data matched literature data<sup>9</sup>.

**<sup>1</sup>H NMR (400 MHz, CDCl<sub>3</sub>)** δ 7.34 (s, 1H), 6.52 (s, 1H), 3.90 (s, 6H).

$^{13}\text{C}$  NMR (100 MHz,  $\text{CDCl}_3$ )  $\delta$  154.50, 130.47, 113.99, 97.72, 56.49.

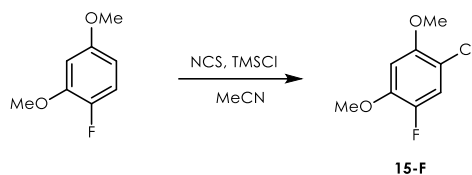

**1-chloro-5-fluoro-2,4-dimethoxybenzene (15-F).** The title compound prepared from reported literature chlorination method<sup>7</sup>. The crude solid product after work-up was purified by silica gel column using ethyl acetate/ hexane (5%) to give the title compound as a white solid (164 mg, 58%) from 1-fluoro-2,4-dimethoxybenzene (234 mg, 1.5 mmol).

$^1\text{H}$  NMR (400 MHz,  $\text{CDCl}_3$ )  $\delta$  7.12 (d,  $J$  = 10.6 Hz, 1H), 6.58 (d,  $J$  = 7.6 Hz, 1H), 3.90 (s, 3H), 3.88 (s, 3H).

$^{13}\text{C}$  NMR (100 MHz,  $\text{CDCl}_3$ )  $\delta$  151.53(d,  $J$  = 25 Hz), 146.72(d,  $J$  = 11 Hz), 146.38 (d,  $J$  = 240 Hz), 117.62 (d,  $J$  = 23 Hz), 113.06 (d,  $J$  = 8.8 Hz), 99.62 (d,  $J$  = 2.0 Hz), 56.88.

$^{19}\text{F}$  NMR (376 MHz,  $\text{CDCl}_3$ )  $\delta$  -142.91 (dd,  $J$  = 10.6, 7.6 Hz).

**HRMS (EI):** Calculated for  $\text{C}_8\text{H}_8\text{ClFO}_2$   $[\text{M}]^+$ : 190.0197; found: 190.0191.

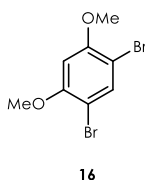

**1,5-dibromo-2,4-dimethoxybenzene (16).** The title compound was prepared from reported procedure. Spectral data matched literature data<sup>10</sup>.

$^1\text{H}$  NMR (400 MHz,  $\text{CDCl}_3$ )  $\delta$  7.63 (s, 1H), 6.47 (s, 1H), 3.89 (s, 6H).

$^{13}\text{C}$  NMR (100 MHz,  $\text{CDCl}_3$ )  $\delta$  156.14, 135.86, 102.39, 97.40, 56.51.

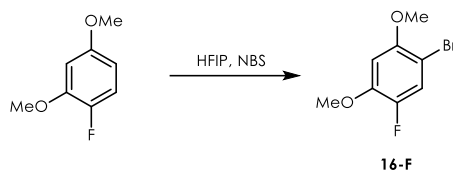

**1-bromo-5-fluoro-2,4-dimethoxybenzene (16-F).** Follow the reported method<sup>11</sup>, the title compound was obtained as an off-white solid (225 mg, 64%) from 1-fluoro-2,4-dimethoxybenzene(234 mg, 1.5 mmol).

$^1\text{H}$  NMR (400 MHz,  $\text{CDCl}_3$ )  $\delta$  7.27 (d,  $J$  = 10.4 Hz, 1H), 6.56 (d,  $J$  = 7.4 Hz, 1H), 3.90 (s, 3H), 3.87 (s, 3H).

**<sup>13</sup>C NMR (100 MHz, CDCl<sub>3</sub>)** δ 152.49 (d, *J* = 2.6), 147.35 (d, *J* = 11.4 Hz), 146.64(d, *J* = 241 Hz), 120.27 (d, *J* = 22.3 Hz), 100.72 (d, *J* = 8.1 Hz), 99.30, 56.92, 56.75

**<sup>19</sup>F NMR (376 MHz, CDCl<sub>3</sub>)** δ -142.78 – -143.13 (m).

**HRMS (EI):** Calculated for C<sub>8</sub>H<sub>8</sub>BrFO<sub>2</sub> [M]<sup>+</sup>: 190.0197; found: 190.0191.

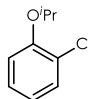

18

**1-chloro-2-isopropoxybenzene (18).** Follow the preparation procedure of compound **2**, the title compound was obtained as a light-yellow liquid (380 mg, 75%) from 2-chlorophenol and 2-iodopropane.

**<sup>1</sup>H NMR (400 MHz, CDCl<sub>3</sub>)** δ 7.36 (dd, *J* = 7.6, 1.6 Hz, 1H), 7.22-7.15 (m, 1H), 6.95 (dd, *J* = 8.4, 1.2Hz, 1H), 6.92-6.85 (m, 1H), 4.55 (septet, *J* = 6.0 Hz, 1H), 1.38 (d, *J* = 6.0 Hz, 1H).

**<sup>13</sup>C NMR (100 MHz, CDCl<sub>3</sub>)** δ 153.66, 130.40, 127.48, 124.30, 121.46, 116.13, 72.08, 22.05.

**HRMS (EI):** Calculated for C<sub>9</sub>H<sub>11</sub>ClO [M]<sup>+</sup>: 170.0498; found: 170.0490.

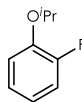

18-F

**1-fluoro-2-isopropoxybenzene(18-F).** Follow the preparation procedure of compound **2**, the title compound was obtained as a colorless liquid (403 mg, 87%) from 2-fluorophenol and 2-iodopropane.

**<sup>1</sup>H NMR (400 MHz, CDCl<sub>3</sub>)** δ 7.13 – 6.94 (m, 3H), 6.93 – 6.85 (m, 1H), 4.53 (hept, *J* = 6.1 Hz, 1H), 1.36 (d, *J* = 6.1 Hz, 6H).

**<sup>13</sup>C NMR (100 MHz, CDCl<sub>3</sub>)** δ 153.82 (d, *J* = 244 Hz), 145.81 (d, *J* = 10.3 Hz, 2H), 124.15 (d, *J* = 3.8 Hz), 121.39 (d, *J* = 7.0 Hz), 117.84 (d, *J* = 2.1 Hz), 116.37 (d, *J* = 18.9 Hz), 72.35, 22.07.

**<sup>19</sup>F NMR (376 MHz, CDCl<sub>3</sub>)** δ -133.35 – -133.47 (m).

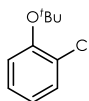

19-Cl

**1-(tert-butoxy)-2-chlorobenzene(19-Cl).** The title compound was prepared from the same procedure as compound **4-Cl** starting with 2-chlorophenol. Colorless liquid (108 mg, 29%) was

obtained. Spectral data matched literature data<sup>12</sup>.

**<sup>1</sup>H NMR (400 MHz, CDCl<sub>3</sub>)** δ 7.37 (dd, *J* = 8.0, 1.5 Hz, 1H), 7.20 – 7.08 (m, 2H), 6.99 (ddd, *J* = 7.9, 7.1, 1.9 Hz, 1H), 1.42 (s, 9H).

**<sup>13</sup>C NMR (100 MHz, CDCl<sub>3</sub>)** δ 152.06, 130.27, 129.22, 127.02, 124.67, 123.94, 81.22, 28.89.

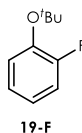

**1-(tert-butoxy)-2-fluorobenzene (19-F)**. The title compound was prepared from the same procedure of compound **4-Cl** from 2-fluorophenol. Colorless liquid (88 mg, 26%) was obtained.

**<sup>1</sup>H NMR (400 MHz, CDCl<sub>3</sub>)** δ 7.17 – 6.93 (m, 4H), 1.36 (d, *J* = 0.8 Hz, 9H).

**<sup>13</sup>C NMR (100 MHz, CDCl<sub>3</sub>)** δ 157.09 (d, *J* = 245.2 Hz), 142.72 (d, *J* = 11.6 Hz), 126.95 (d, *J* = 1.5 Hz), 124.42 (d, *J* = 7.3 Hz), 123.77 (d, *J* = 3.9 Hz), 116.43 (d, *J* = 20.2 Hz), 80.48, 28.46 (d, *J* = 1.2 Hz).

**<sup>19</sup>F NMR (376 MHz, CDCl<sub>3</sub>)** δ -127.05 – -127.20.

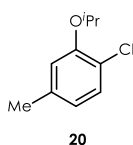

**1-chloro-2-isopropoxy-4-methylbenzene (20)**. Follow the preparation procedure of compound **2**, the title compound was obtained as a colorless liquid (415 mg, 75%) from 2-chloro-5-methylphenol and 2-iodopropane.

**<sup>1</sup>H NMR (400 MHz, CDCl<sub>3</sub>)** δ 7.22 (d, *J* = 8.0 Hz, 1H), 6.77 (s, 1H), 6.70 (dd, *J* = 8.0, 1.1 Hz, 1H), 4.53 (hept, *J* = 6.1 Hz, 1H), 2.31 (s, 3H), 1.37 (d, *J* = 6.1 Hz, 6H).

**<sup>13</sup>C NMR (100 MHz, CDCl<sub>3</sub>)** δ 153.31, 137.5, 129.8, 122.25, 121.23, 117.16, 72.08, 22.09, 21.28.

**HRMS (EI)**: Calculated for C<sub>10</sub>H<sub>13</sub>ClO [M]<sup>+</sup>: 184.0655; found: 184.0649.

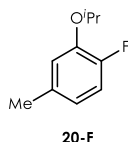

**1-fluoro-2-isopropoxy-4-methylbenzene (20-F)**. Follow the preparation procedure of compound **2**, the title compound was obtained as a colorless liquid (304 mg, 90%) from 2-fluoro-5-methylphenol and 2-iodopropane.

**<sup>1</sup>H NMR (400 MHz, CDCl<sub>3</sub>)** δ 6.94 (dd, *J* = 11.3, 8.2 Hz, 1H), 6.79 (dd, *J* = 8.0, 1.6 Hz, 1H), 6.72 – 6.64 (m, 1H), 4.51 (hept, *J* = 6.1 Hz, 1H), 2.29 (s, 3H), 1.35 (d, *J* = 6.1 Hz, 6H).

**<sup>13</sup>C NMR (100 MHz, CDCl<sub>3</sub>)** δ 151.97 (d, *J* = 242.4 Hz), 145.26 (d, *J* = 10.7 Hz), 133.81 (d, *J* = 3.9 Hz), 121.70 (d, *J* = 6.8 Hz), 118.69 (d, *J* = 1.9 Hz), 115.85 (d, *J* = 18.8 Hz), 72.35, 22.12, 21.01.

**<sup>19</sup>F NMR (376 MHz, CDCl<sub>3</sub>)** δ -138.18 – -138.31 (m).

**HRMS (EI):** Calculated for C<sub>10</sub>H<sub>13</sub>FO [M]<sup>+</sup>: 168.0950; found: 168.0944.

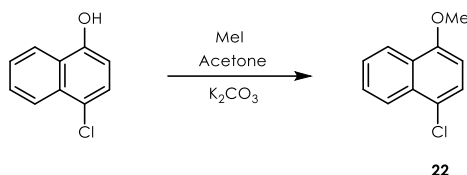

**1-chloro-4-methoxynaphthalene (22).** To a solution of the 4-chloro-2-naphthol (500 mg, 2.81 mmol, 1.0 equiv.) in acetone was added anhydrous potassium carbonate (776 mg, 5.62 mmol) followed by the iodomethane (875 μl, 14.05 mmol, 5 equiv.). The reaction was stirred under room temperature overnight. Solvent was removed under reduced pressure. The residue was then extracted with ethyl acetate and water. The organic phase was washed with water, NaOH solution (10%, w/w), water, saturated brine, dried with Na<sub>2</sub>SO<sub>4</sub>, filtered, and concentrated in vacuo to give the crude product which was then purified by silica gel column with ethyl acetate/ hexane (1/10) to afford the title compound in 85% yield (462 mg) as a colorless liquid. Spectral data matched literature data<sup>13</sup>.

**<sup>1</sup>H NMR (400 MHz, CDCl<sub>3</sub>)** δ 8.34 – 8.24 (m, 1H), 8.24 – 8.17 (m, 1H), 7.62 (ddd, *J* = 8.4, 6.9, 1.3 Hz, 1H), 7.54 (ddd, *J* = 8.2, 6.9, 1.2 Hz, 1H), 7.46 (d, *J* = 8.2 Hz, 1H), 6.72 (d, *J* = 8.2 Hz, 1H), 3.99 (s, 3H).

**<sup>13</sup>C NMR (100 MHz, CDCl<sub>3</sub>)** δ 154.55, 131.25, 127.44, 126.56, 125.89, 125.72, 124.19, 123.16, 122.38, 103.77, 55.66.

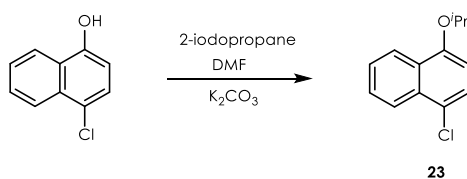

**1-chloro-4-isopropoxynaphthalene (23).** To a solution of the 4-chloro-2-naphthol (356 mg, 2 mmol, 1.0 equiv.) in DMF was added anhydrous potassium carbonate (552 mg, 4 mmol, 2 equiv.), followed by the 2-iodopropane (680 mg, 4 mmol, 2 equiv.). The reaction was stirred under room temperature overnight and then extracted with ethyl acetate and water. The organic phase was washed with water, NaOH solution (10%, w/w), water, saturated brine, dried with Na<sub>2</sub>SO<sub>4</sub>, filtered, and concentrated in vacuo to give the crude product which was then purified by silica gel column with ethyl acetate/ hexane (1/10) to afford the title compound in 70% yield (308 mg) as a colorless oil.





mg, 1.5 mmol, 1.5 equiv.) at 0°C. The solution was stirred for additional 15 min. and benzyl bromide (143  $\mu$ l, 1.2 mmol, 1.2 equiv.) was then added. The reaction was warmed to room temperature and stirred for 1h. The solution was then diluted with ethyl acetate and water. The organic phase was washed with water, saturated brine, dried over with Na<sub>2</sub>SO<sub>4</sub>, filtered and concentrated in vacuo to give the crude product which was purified by silica gel column with ethyl acetate/ hexane (1/20) as the eluant to give the title compound as a white solid (243 mg, 81%).

**<sup>1</sup>H NMR (400 MHz, CDCl<sub>3</sub>)**  $\delta$  7.34 – 7.23 (m, 3H), 7.23 – 7.18 (d, *J* = 6.8 Hz, 2H), 7.17 – 6.99 (s, 2H), 6.94 (t, *J* = 8.6 Hz, 2H), 4.79 (s, 2H), 1.42 (s, 9H).

**<sup>13</sup>C NMR (100 MHz, CDCl<sub>3</sub>)**  $\delta$  160.59 (d, *J* = 245.2 Hz), 154.83, 138.60 (d, *J* = 2.5 Hz), 138.27, 128.50, 128.41, 127.59, 127.19, 115.39 (d, *J* = 22.5 Hz), 80.63, 54.03, 28.26.

**<sup>19</sup>F NMR (376 MHz, CDCl<sub>3</sub>)**  $\delta$  -116.33.

**HRMS (EI):** Calculated for C<sub>18</sub>H<sub>20</sub>FNO<sub>2</sub> [M]<sup>+</sup>: 301.1478; found: 301.1472.

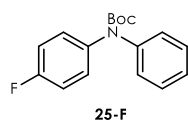

**tert-butyl (4-fluorophenyl)(phenyl)carbamate (25-F).** The title compound was obtained from our reported method<sup>15</sup>.

**<sup>1</sup>H NMR (400 MHz, CDCl<sub>3</sub>)**  $\delta$  7.39 – 7.27 (m, 2H), 7.24 – 7.13 (m, 5H), 7.06 – 6.93 (m, 2H), 1.45 (s, 9H).

**<sup>13</sup>C NMR (100 MHz, CDCl<sub>3</sub>)**  $\delta$  160.41 (d, *J* = 245.4 Hz), 153.76, 142.88, 139.00 (d, *J* = 3.2 Hz), 128.73, 128.67 (d, *J* = 8.4 Hz), 126.72, 125.67, 115.51 (d, *J* = 22.6 Hz), 81.29, 28.20.

**<sup>19</sup>F NMR (376 MHz, CDCl<sub>3</sub>)**  $\delta$  -116.61 (s).

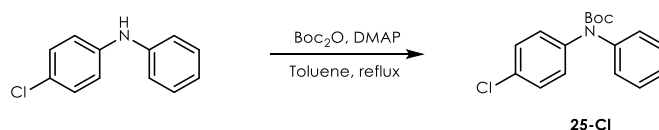

**tert-butyl (4-chlorophenyl)(phenyl)carbamate (25-Cl).** To a solution of the 4-chloro-N-phenylaniline (102 mg, 0.5 mmol, 1.0 equiv.) and DMAP (61 mg, 0.5 mmol, 1.0 equiv.) in toluene was added di-tert-butyl dicarbonate (131 mg, 0.6 mmol, 1.2 equiv.). The reaction was stirred under reflux for 1h and then extracted with ethyl acetate and water. The organic phase was washed with 1N HCl solution, saturated brine, dried with Na<sub>2</sub>SO<sub>4</sub>, filtered, and concentrated in vacuo to give the residue which was purified by silica gel chromatography using ethyl acetate/hexane (0 ~ 1/10) to afford the title compound as a white solid (140 mg, 92%).

**<sup>1</sup>H NMR (400 MHz, CDCl<sub>3</sub>)**  $\delta$  7.35 – 7.28 (m, 2H), 7.28 – 7.23 (m, 2H), 7.22 – 7.10 (m, 5H), 1.44 (s, 9H).

**<sup>13</sup>C NMR (100 MHz, CDCl<sub>3</sub>)** δ 153.54, 142.62, 141.64, 130.95, 128.83, 128.76, 127.99, 127.05, 125.95, 81.49, 28.20.

**HRMS (EI):** Calculated for C<sub>17</sub>H<sub>18</sub>ClNO<sub>2</sub> [M]<sup>+</sup>: 303.1026; found: 303.1020.

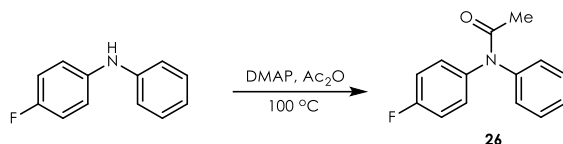

**N-(4-fluorophenyl)-N-phenylacetamide (26).** To a solution of 4-fluoro-N-phenylaniline (187 mg, 1 mmol) in 5 ml acetic anhydride was added DMAP (122 mg, 1 mmol, 1equiv.). The solution was stirred under 100 °C for 5h. The solution was poured into water and extracted with ethyl acetate. The organic phase was separated and washed with water, 10% (w/w) NaOH solution, saturated brine, dried with Na<sub>2</sub>SO<sub>4</sub>, filtered, and concentrated in vacuo to give the crude product which was purified by silica gel chromatography using ethyl acetate/hexane (3/10) to afford the title compound as a light-yellow oil (190 mg, 83%). Spectral data matched literature data<sup>16</sup>.

**<sup>1</sup>H NMR (400 MHz, CDCl<sub>3</sub>)** δ 7.54 – 6.88 (m, 9H), 2.06 (s, 3H).

**<sup>13</sup>C NMR (125 MHz, CDCl<sub>3</sub>, 55 °C)** δ 170.17, 160.96 (d, *J* = 243.7 Hz), 143.08, 139.07, 131.19 – 125.21 (m), 115.87, 23.63 – 23.28 (m).

**<sup>19</sup>F NMR (376 MHz, CDCl<sub>3</sub>)** δ -113.24, -115.98.

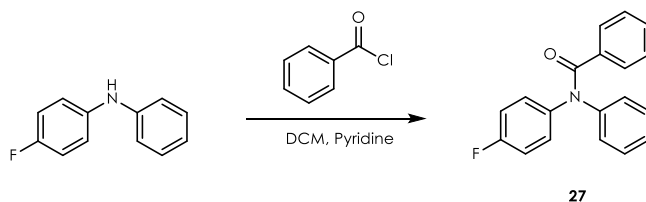

**N-(4-fluorophenyl)-N-phenylbenzamide (27).** To a solution of 4-fluoro-N-phenylaniline (94 mg, 0.5 mmol, 1 equiv.) in DCM were added pyridine (40 μl, 1 mmol, 2 equiv.) and benzoyl chloride (70 μl, 0.6 mmol, 1.2 equiv.) sequentially. The solution was stirred under room temperature for 3h. The mixture was then extracted with ethyl acetate and water. The organic phase was washed with water, 1N HCl solution, 10% NaOH solution, saturated brine, dried with Na<sub>2</sub>SO<sub>4</sub>, filtered, and concentrated in vacuo to give the crude product which was purified by stirring in ethyl acetate/ hexane (1/20). The title compound was obtained as an off-white solid after filtration (118 mg, 81%).

**<sup>1</sup>H NMR (400 MHz, CDCl<sub>3</sub>)** δ 7.48 – 7.40 (m, 2H), 7.32 – 7.26 (m, 2H), 7.24 – 7.17 (m, 3H), 7.17 – 7.09 (m, 4H), 7.05 – 6.93 (m, 2H).

**<sup>13</sup>C NMR (100 MHz, CDCl<sub>3</sub>)** δ 170.58, 160.72 (d, *J* = 246.8 Hz), 143.76, 139.83 (d, *J* = 3.1 Hz), 135.81, 130.24, 129.17, 129.08, 129.02, 128.93, 127.90, 127.37, 126.44, 116.00 (d, *J* = 22.8 Hz).

$^{19}\text{F}$  NMR (376 MHz,  $\text{CDCl}_3$ )  $\delta$  -115.36.

HRMS (EI): Calculated for  $\text{C}_{19}\text{H}_{14}\text{FNO}$   $[\text{M}]^+$ : 291.1059; found: 291.1056.

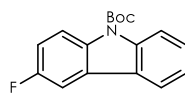

28-F

**tert-butyl 3-fluoro-9H-carbazole-9-carboxylate (28-F).** The title compound was obtained from reported method<sup>15</sup>.

$^1\text{H}$  NMR (400 MHz,  $\text{CDCl}_3$ )  $\delta$  8.40 – 8.20 (m, 2H), 7.92 (dd,  $J$  = 7.7, 0.6 Hz, 1H), 7.61 (dd,  $J$  = 8.3, 2.6 Hz, 1H), 7.49 (ddd,  $J$  = 8.5, 7.3, 1.2 Hz, 1H), 7.35 (ddd,  $J$  = 8.2, 7.5, 0.8 Hz, 1H), 7.18 (td,  $J$  = 9.0, 2.7 Hz, 1H), 1.77 (s, 9H).

$^{13}\text{C}$  NMR (100 MHz,  $\text{CDCl}_3$ )  $\delta$  159.26 (d,  $J$  = 240.6 Hz), 150.87, 139.14, 134.65 (d,  $J$  = 1.1 Hz), 127.63, 126.84 (d,  $J$  = 9.5 Hz), 125.09 (d,  $J$  = 3.6 Hz), 122.99, 119.76, 117.31 (d,  $J$  = 8.6 Hz), 116.41, 114.25 (d,  $J$  = 24.2 Hz), 105.54 (d,  $J$  = 23.9 Hz), 84.09, 28.36.

$^{19}\text{F}$  NMR (376 MHz,  $\text{CDCl}_3$ )  $\delta$  -120.23 (td,  $J$  = 8.7, 4.6 Hz, 1H).

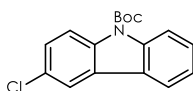

28-Cl

**tert-butyl 3-chloro-9H-carbazole-9-carboxylate (28-Cl).** The title compound was prepared as a white solid from the same procedure of compound **28-F** starting with 3-chloro-9H-carbazole which was synthesized from reported procedure<sup>17</sup>.

$^1\text{H}$  NMR (400 MHz,  $\text{CDCl}_3$ )  $\delta$  8.26 (dd,  $J$  = 14.0, 8.7 Hz, 2H), 7.96 – 7.89 (m, 2H), 7.53 – 7.46 (m, 1H), 7.41 (dd,  $J$  = 8.9, 2.2 Hz, 1H), 7.36 (td,  $J$  = 7.8, 0.8 Hz, 1H), 1.76 (s, 9H).

$^{13}\text{C}$  NMR (100 MHz,  $\text{CDCl}_3$ )  $\delta$  150.81, 138.86, 136.86, 128.56, 127.74, 127.09, 126.98, 124.66, 123.21, 119.75, 119.36, 117.36, 116.37, 84.32, 28.36.

HRMS (EI): Calculated for  $\text{C}_{12}\text{H}_8\text{NCl}$   $[\text{M}]^+$ : 201.0345; found: 201.0340.

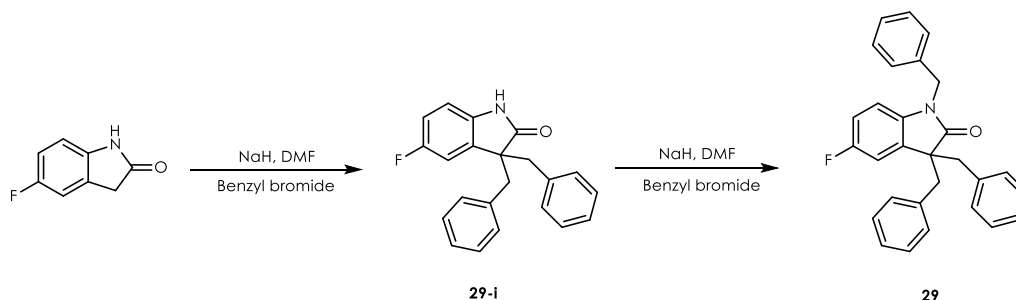

**3,3-dibenzyl-5-fluoroindolin-2-one (29-i).** To a solution of 5-fluoroindolin-2-one (302 mg, 2 mmol, 1 equiv.) in DMF was added NaH (60% wt/wt, 160 mg, 4 mmol, 2 equiv.) at 0°C. The solution

was stirred for additional 30 min and benzyl bromide were (475  $\mu$ l, 4 mmol, 2 equiv.) then added. The reaction was warmed to room temperature and stirred overnight. The reaction solution was poured into water. The crude solid product was collected by filtration and then stirred in hexane to get the intermediate which was used directly in the next step without further purification (419 mg, 63%).

**$^1\text{H}$  NMR (400 MHz, DMSO- $d_6$ )**  $\delta$  9.95 (s, 1H), 7.43 (dd,  $J$  = 8.6, 2.5 Hz, 1H), 7.06 – 7.01 (m, 6H), 6.91 – 6.84 (m, 4H), 6.75 (td,  $J$  = 9.7, 2.6 Hz, 1H), 6.30 (dd,  $J$  = 8.4, 4.4 Hz, 1H), 3.25 – 3.13 (m, 4H).

**$^{13}\text{C}$  NMR (100 MHz, DMSO- $d_6$ )**  $\delta$  179.81, 157.92 (d,  $J$  = 235.8 Hz), 138.22 (d,  $J$  = 1.7 Hz), 136.40, 132.84 (d,  $J$  = 8.3 Hz), 129.89, 127.89, 126.67, 114.08 (d,  $J$  = 23.3 Hz), 112.69 (d,  $J$  = 24.5 Hz), 109.68 (d,  $J$  = 8.2 Hz), 57.30 (d,  $J$  = 1.7 Hz), 43.04.

**$^{19}\text{F}$  NMR (376 MHz, DMSO- $d_6$ )**  $\delta$  -122.01 – -122.15 (m).

**HRMS (EI):** Calculated for  $\text{C}_{22}\text{H}_{18}\text{FNO}$   $[M]^+$ : 331.1372; found: 331.1369.

**1,3,3-tribenzyl-5-fluoroindolin-2-one (29).** To a solution of 5-fluoroindolin-2-one (166 mg, 0.5 mmol, 1equiv.) in DMF was added NaH (60% wt/wt, 30 mg, 0.75 mmol, 1.5 equiv.) at 0°C. The solution was stirred for additional 15 min and benzyl bromide were (71  $\mu$ l, 0.6 mmol, 1.2 equiv.) then added. The reaction was warmed to room temperature and stirred for 2 h. The reaction solution was extracted with ethyl acetate and water. The organic phase was washed with water, saturated brine, dried over with  $\text{Na}_2\text{SO}_4$ , filtered and concentrated in vacuo to give the crude solid product which was washed with hexane to get the title compound as a light-yellow solid (125 mg, 60%).

**$^1\text{H}$  NMR (400 MHz,  $\text{CDCl}_3$ )**  $\delta$  7.19 – 7.00 (m, 5H), 7.00 – 6.92 (m, 2H), 6.69 – 6.61 (m, 0H), 6.37 (d,  $J$  = 7.4 Hz, 1H), 6.03 (dd,  $J$  = 8.5, 4.2 Hz, 0H), 4.54 (d,  $J$  = 29.1 Hz, 1H), 3.42 (d,  $J$  = 13.0 Hz, 1H), 3.22 (d,  $J$  = 13.0 Hz, 1H).

**$^{13}\text{C}$  NMR (100 MHz,  $\text{CDCl}_3$ )**  $\delta$  177.78, 158.68 (d,  $J$  = 240.1 Hz), 138.80 (d,  $J$  = 1.9 Hz), 135.53, 134.72, 131.97 (d,  $J$  = 7.8 Hz), 130.12, 128.44, 127.86, 126.97, 126.64, 126.24, 114.11 (d,  $J$  = 23.4 Hz), 112.00 (d,  $J$  = 24.5 Hz), 109.48 (d,  $J$  = 8.1 Hz), 56.98 (d,  $J$  = 1.7 Hz), 43.62, 43.13.

**$^{19}\text{F}$  NMR (376 MHz,  $\text{CDCl}_3$ )**  $\delta$  -121.00 – -121.18 (m).

**HRMS (EI):** Calculated for  $\text{C}_{29}\text{H}_{24}\text{FNO}$   $[M]^+$ : 421.1842; found: 421.1838.

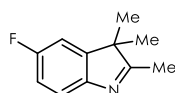

30-F

**5-fluoro-2,3,3-trimethyl-3H-indole (30-F).** The title compound was prepared from reported procedure. Spectra data were in agreement with literature values<sup>18</sup>.

**$^1\text{H}$  NMR (400 MHz,  $\text{CDCl}_3$ )**  $\delta$  7.46 – 7.40 (m, 1H), 7.00 – 6.92 (m, 2H), 2.24 (s, 3H), 1.28 (s, 6H).

**<sup>13</sup>C NMR (100 MHz, CDCl<sub>3</sub>)** δ 187.62 (d, *J* = 3.5 Hz), 161.12 (d, *J* = 243.6 Hz), 149.57 (d, *J* = 2.2 Hz), 147.55 (d, *J* = 8.5 Hz), 120.40 (d, *J* = 8.8 Hz), 114.01 (d, *J* = 23.6 Hz), 108.99 (d, *J* = 24.3 Hz), 54.09 (d, *J* = 2.2 Hz), 22.94 15.32.

**<sup>19</sup>F NMR (376 MHz, CDCl<sub>3</sub>)** δ -117.75 (tt, *J* = 17.0, 8.5 Hz).

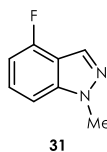

**4-fluoro-1-methyl-1H-indazole (31)**. The title compound was prepared according to a published procedure; Spectra data were in agreement with literature values<sup>19</sup>.

**<sup>1</sup>H NMR (400 MHz, CDCl<sub>3</sub>)** δ 8.04 (s, 1H), 7.36 – 7.23 (m, 1H), 7.15 (d, *J* = 8.4 Hz, 1H), 6.85 – 6.72 (m, 1H), 4.07 (d, *J* = 0.5 Hz, 3H).

**<sup>13</sup>C NMR (100 MHz, CDCl<sub>3</sub>)** δ 155.80 (d, *J* = 252.3 Hz), 142.48 (d, *J* = 9.4 Hz), 129.15 (d, *J* = 2.0 Hz), 127.09 (d, *J* = 7.7 Hz), 114.29 (d, *J* = 23.4 Hz), 104.93 (d, *J* = 4.2 Hz), 104.65 (d, *J* = 18.6 Hz), 35.79.

**<sup>19</sup>F NMR (376 MHz, CDCl<sub>3</sub>)** δ -118.13 (dd, *J* = 10.0, 4.9 Hz).

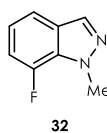

**7-fluoro-1-methyl-1H-indazole (32)**. The title compound was prepared from a reported literature method. Spectra data were in agreement with literature values<sup>20</sup>.

**<sup>1</sup>H NMR (400 MHz, CDCl<sub>3</sub>)** δ 7.96 (d, *J* = 2.4 Hz, 1H), 7.46 (dd, *J* = 6.2, 2.7 Hz, 1H), 7.06 – 6.97 (m, 2H), 4.26 (d, *J* = 0.9 Hz, 3H).

**<sup>13</sup>C NMR (100 MHz, CDCl<sub>3</sub>)** δ 148.57 (d, *J* = 246.8 Hz), 133.08 (d, *J* = 1.3 Hz), 129.45 (d, *J* = 12.8 Hz), 128.00 (d, *J* = 4.3 Hz), 120.88 (d, *J* = 5.5 Hz), 116.69 (d, *J* = 4.3 Hz), 110.70 (d, *J* = 17.1 Hz), 38.20 (d, *J* = 4.3 Hz).

**<sup>19</sup>F NMR (376 MHz, CDCl<sub>3</sub>)** δ -135.16 – -135.26 (m).

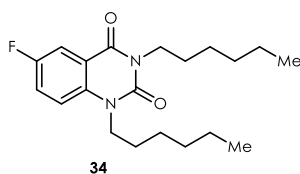

**6-fluoro-1,3-dihexylquinazoline-2,4(1H,3H)-dione (34)**. The title compound was prepared from our reported method<sup>21</sup>.

**<sup>1</sup>H NMR (400 MHz, CDCl<sub>3</sub>)** δ 7.89 (dd, *J* = 8.2, 3.1 Hz, 1H), 7.37 (ddd, *J* = 9.2, 7.6, 3.1 Hz, 1H), 7.14 (dd, *J* = 9.2, 4.0 Hz, 1H), 4.20 – 3.91 (m, 4H), 1.76 – 1.59 (m, 4H), 1.48 – 1.20 (m, 12H), 0.95 – 0.81 (m, 6H).

**<sup>13</sup>C NMR (100 MHz, CDCl<sub>3</sub>)** δ 160.78 (d, *J* = 2.8 Hz), 158.03 (d, *J* = 244.1 Hz), 150.34, 136.20 (d, *J* = 1.9 Hz), 122.52 (d, *J* = 23.9 Hz), 117.01 (d, *J* = 7.6 Hz), 115.37 (d, *J* = 7.4 Hz), 114.50 (d, *J* = 24.0 Hz), 44.03, 42.13, 31.46, 31.42, 27.68, 27.22, 26.61, 26.42, 22.53, 22.52, 14.00, 13.95.



**<sup>1</sup>H NMR (400 MHz, CDCl<sub>3</sub>)** δ 9.24 (s, 1H), 8.11 (d, *J* = 8.4 Hz, 1H), 8.07 – 7.98 (m, 1H), 7.93 (ddd, *J* = 8.4, 7.0, 1.4 Hz, 1H), 7.67 (ddd, *J* = 8.2, 7.0, 1.1 Hz, 1H), 7.46 – 7.36 (m, 2H), 7.14 – 7.04 (m, 2H), 2.17 (s, 3H).

**<sup>13</sup>C NMR (100 MHz, CDCl<sub>3</sub>)** δ 171.07, 162.07, 161.79 (d, *J* = 248.7 Hz), 154.82, 152.75, 136.83 (d, *J* = 3.3 Hz), 134.39, 129.60 (d, *J* = 8.7 Hz), 129.14, 128.73, 124.70, 121.64, 116.49 (d, *J* = 22.8 Hz), 23.58.

**<sup>19</sup>F NMR (376 MHz, CDCl<sub>3</sub>)** δ -112.95.

**HRMS (EI):** Calculated for C<sub>16</sub>H<sub>12</sub>FN<sub>3</sub>O [M]<sup>+</sup>: 281.0964; found: 281.0959.

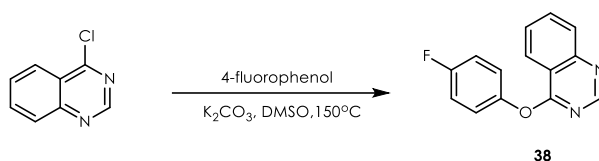

**4-(4-fluorophenoxy) quinazoline (38).** To a solution of 4-chloroquinazoline (329 mg, 2 mmol, 1 equiv.) in DMSO were added 4-fluorophenol (448 mg, 4 mmol, 2 equiv.) and anhydrous potassium carbonate (553 mg, 4 mmol, 2 equiv.). The mixture was stirred at 150 °C for 2 h. Water and ethyl acetate were added to the reaction. The organic phase was separated and washed with water, 10% (w/w) NaOH solution, saturated brine, dried with Na<sub>2</sub>SO<sub>4</sub>, filtered, and concentrated in vacuo to give the residue which was purified by silica gel chromatography using ethyl acetate/ hexane (1/5 to 1/2) to afford the title compound as a white solid (394 mg, 82%).

**<sup>1</sup>H NMR (400 MHz, CDCl<sub>3</sub>)** δ 8.77 (s, 1H), 8.38 (dd, *J* = 8.3, 0.8 Hz, 1H), 8.02 (d, *J* = 8.4 Hz, 1H), 7.93 (ddd, *J* = 8.4, 7.0, 1.4 Hz, 1H), 7.68 (ddd, *J* = 8.2, 7.0, 1.1 Hz, 1H), 7.27 – 7.21 (m, 2H), 7.21 – 7.12 (m, 2H).

**<sup>13</sup>C NMR (100 MHz, CDCl<sub>3</sub>)** δ 166.91, 160.32 (d, *J* = 244.6 Hz), 154.10, 151.68, 148.06 (d, *J* = 2.9 Hz), 134.20, 127.81 (d, *J* = 28.6 Hz), 123.51, 123.36, 123.28, 116.48 (d, *J* = 23.6 Hz), 116.31.

**<sup>19</sup>F NMR (376 MHz, CDCl<sub>3</sub>)** δ -106.15 – -121.21 (m).

**HRMS (EI):** Calculated for C<sub>14</sub>H<sub>9</sub>FN<sub>2</sub>O [M]<sup>+</sup>: 240.0699; found: 240.0670.

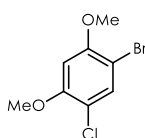

**39**

**1-bromo-5-chloro-2,4-dimethoxybenzene (39).** The title compound was prepared from reported procedure. Spectral data matched literature data<sup>11</sup>.

**<sup>1</sup>H NMR (400 MHz, CDCl<sub>3</sub>)** δ 7.51 (s, 1H), 6.51 (s, 1H), 3.91 (s, 3H), 3.90 (s, 3H).

$^{13}\text{C}$  NMR (100 MHz,  $\text{CDCl}_3$ )  $\delta$  155.50, 155.18, 133.23, 114.51, 101.92, 97.56, 56.60, 56.45

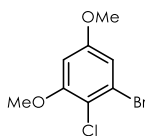

40

**1-bromo-2-chloro-3,5-dimethoxybenzene (40).** The title compound was prepared from the reported literature. Spectral data matched literature data<sup>7</sup>.

$^1\text{H}$  NMR (400 MHz,  $\text{CDCl}_3$ )  $\delta$  6.78 (d,  $J = 2.7$  Hz, 1H), 6.46 (d,  $J = 2.7$  Hz, 1H), 3.87 (s, 3H), 3.79 (s, 3H).

$^{13}\text{C}$  NMR (100 MHz,  $\text{CDCl}_3$ )  $\delta$  158.96, 156.54, 123.60, 115.36, 109.41, 99.24, 56.43, 55.75.

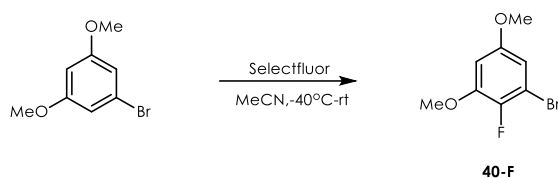

40-F

**1-bromo-2-fluoro-3,5-dimethoxybenzene (40-F).** To a solution of 1-bromo-3,5-dimethoxybenzene (434 mg, 2 mmol) in acetonitrile was added selectfluor (779 mg, 2.2 mmol, 1.1 equiv.) at  $-40^\circ\text{C}$ . The reaction was stirred at  $-40^\circ\text{C}$  for 0.5 h and then stirred overnight at room temperature. The organic phase was washed with water, saturated brine, dried over with  $\text{Na}_2\text{SO}_4$ , filtered and concentrated in vacuo to give the crude product which was purified by flash LC with ethyl acetate / hexane (1/20) as the eluant to give the title compound as a colorless oil (178 mg, 38%).

$^1\text{H}$  NMR (400 MHz,  $\text{CDCl}_3$ )  $\delta$  6.59 (dd,  $J = 4.6, 2.9$  Hz, 1H), 6.47 (dd,  $J = 6.6, 2.9$  Hz, 1H), 3.86 (s, 3H), 3.76 (s, 3H).

$^{13}\text{C}$  NMR (100 MHz,  $\text{CDCl}_3$ )  $\delta$  155.86 (d,  $J = 3.0$  Hz), 148.86 (d,  $J = 12.6$  Hz), 144.63 (d,  $J = 237.8$  Hz), 109.23 (d,  $J = 19.5$  Hz), 107.54 (d,  $J = 0.9$  Hz), 100.63 (d,  $J = 0.6$  Hz), 56.42, 55.87.

$^{19}\text{F}$  NMR (376 MHz,  $\text{CDCl}_3$ )  $\delta$  -138.80 (dd,  $J = 6.5, 4.6$  Hz).

HRMS (EI): Calculated for  $\text{C}_8\text{H}_8\text{BrFO}_2$   $[\text{M}]^+$ : 233.9692; found: 233.9691

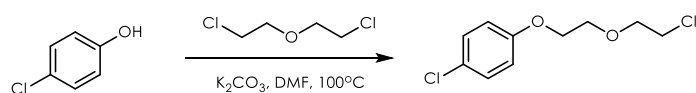

41

**1-chloro-4-(2-(2-chloroethoxy)ethoxy)benzene (41).** To a solution of the 4-chlorophenol (514 mg, 4 mmol, 1.0 equiv.) in DMF was added anhydrous potassium carbonate (1.1g, 8 mmol, 2.0



equiv.) follow by the 1-chloro-2-(2-chloroethoxy) ethane (572 mg, 4 mmol, 1 equiv.). The reaction was heated to 100 °C and stirred overnight. The reaction was cooled to room temperature and then extracted with ethyl acetate and water. The organic phase was washed with water, NaOH solution (10%, w/w), water, saturated brine, dried with Na<sub>2</sub>SO<sub>4</sub>, filtered, and concentrated in vacuo to give the crude product which was purified by flash LC using hexane/ ethyl acetate (0% to 5%) as a colorless oil (581 mg, 62%).

**<sup>1</sup>H NMR (400 MHz, CDCl<sub>3</sub>)** δ 7.26 – 7.20 (m, 2H), 6.89 – 6.81 (m, 2H), 4.11 (dd, *J* = 5.4, 4.1 Hz, 2H), 3.87 (dd, *J* = 5.4, 4.1 Hz, 2H), 3.82 (t, *J* = 5.9 Hz, 2H), 3.65 (t, *J* = 5.8 Hz, 2H).

**<sup>13</sup>C NMR (100 MHz, CDCl<sub>3</sub>)** δ 157.22, 129.23, 125.75, 115.86, 71.47, 69.60, 67.67, 42.64.

**HRMS (EI):** Calculated for C<sub>10</sub>H<sub>12</sub>Cl<sub>2</sub>O<sub>2</sub> [M]<sup>+</sup>: 234.0214; found: 234.0210

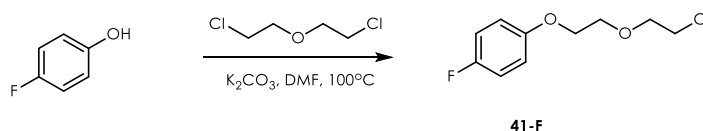

**1-chloro-4-(2-(2-chloroethoxy) ethoxy) benzene(41-F).** The title compound was obtained as a colorless oil (548 mg, 63%) from the same preparation procedure of the compound **41** starting with 4-fluorophenol.

**<sup>1</sup>H NMR (400 MHz, CDCl<sub>3</sub>)** δ 7.00 – 6.91 (m, 2H), 6.91 – 6.81 (m, 2H), 4.11 – 4.05 (m, 2H), 3.87 – 3.83 (m, 2H), 3.81 (t, *J* = 5.8 Hz, 2H), 3.65 (t, *J* = 5.9 Hz, 2H).

**<sup>13</sup>C NMR (100 MHz, CDCl<sub>3</sub>)** δ 157.36 (d, *J* = 238.5 Hz), 154.77 (d, *J* = 2.1 Hz), 115.80 (d, *J* = 17.6 Hz), 115.64 (d, *J* = 2.4 Hz), 71.53, 69.78, 68.10, 42.68.

**<sup>19</sup>F NMR (376 MHz, CDCl<sub>3</sub>)** δ -123.69 – -123.81 (m).

**HRMS (EI):** Calculated for C<sub>10</sub>H<sub>12</sub>ClFO<sub>2</sub> [M]<sup>+</sup>: 218.0510 found: 218.0504

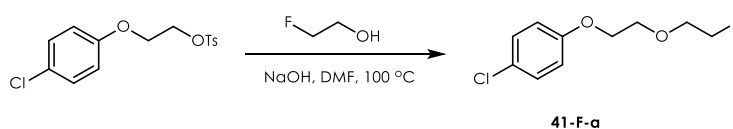

**2-(4-chlorophenoxy) ethyl 4-methylbenzenesulfonate(41-F-a).** To a solution of 2-(4-chlorophenoxy) ethyl 4-methylbenzenesulfonate (164 mg, 0.5 mmol, 1 equiv.) in DMF were added NaOH (49 mg, 1.5 mmol, 3 equiv.) and 2-fluoroethanol (87 μl, 1.5 mmol, 3 equiv.). The reaction was stirred under 100 °C for 1h and then extracted with ethyl acetate and water. The organic phase was washed with water, NaOH solution (10%, w/w), water, saturated brine, dried with Na<sub>2</sub>SO<sub>4</sub>, filtered, and concentrated in vacuo to give the residue which was purified by silica gel chromatography using ethyl acetate/ hexane (10%) as the eluent to afford the title compound as a colorless oil (72 mg, 66%).

**<sup>1</sup>H NMR (400 MHz, CDCl<sub>3</sub>)** δ 7.25 – 7.20 (m, 2H), 6.88 – 6.81 (m, 2H), 4.69 – 4.58 (m, 1H), 4.56 – 4.49 (m, 1H), 4.11 (dd, *J* = 5.4, 4.1 Hz, 2H), 3.90 – 3.86 (m, 2H), 3.86 – 3.83 (m, 1H), 3.73 – 3.80 (m, 1H).

**<sup>13</sup>C NMR (100 MHz, CDCl<sub>3</sub>)** δ 157.30, 129.27, 125.78, 115.90, 83.11 (d, *J* = 169.1 Hz), 70.58 (d, *J* = 19.6 Hz), 69.81, 67.74.

**<sup>19</sup>F NMR (376 MHz, CDCl<sub>3</sub>)** δ -222.74 – -223.15 (m).

**HRMS (EI):** Calculated for C<sub>10</sub>H<sub>12</sub>ClFO<sub>2</sub> [M]<sup>+</sup>: 218.0510 found: 218.0505

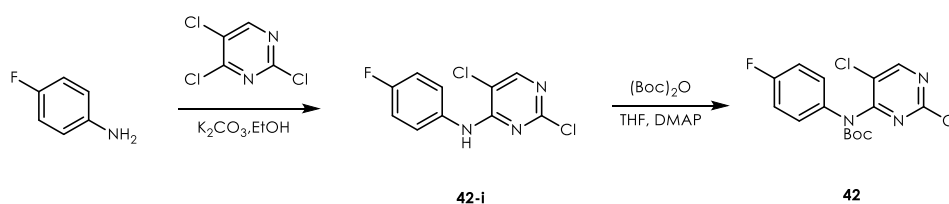

**2,5-dichloro-N-(4-fluorophenyl) pyrimidin-4-amine (42-i).** To a solution of 2,4,5-trichloropyrimidine (1.1 g, 6 mmol, 1.2 equiv.) in ethanol were added potassium carbonate (1.04 g, 7.5 mmol, 1.5 equiv.) and 4-fluoroaniline (555 mg, 5 mmol, 1 equiv.). The mixture was stirred under room temperature for 3 h and then extracted with ethyl acetate and water. The organic phase was washed with 1N HCl solution, saturated brine, dried with Na<sub>2</sub>SO<sub>4</sub>, filtered, and concentrated in vacuo to give the crude solid which was washed with ethyl acetate/hexane (1/10) to give the title compound as an off-white solid after filtration (848 mg, 66%).

**<sup>1</sup>H NMR (400 MHz, CDCl<sub>3</sub>)** δ 8.20 (s, 1H), 7.63 – 7.50 (m, 2H), 7.20 (br, 1H), 7.14 – 7.05 (m, 2H).

**<sup>13</sup>C NMR (100 MHz, CDCl<sub>3</sub>)** δ 159.95 (d, *J* = 245.2 Hz), 158.26, 156.47, 154.64, 132.67 (d, *J* = 3.0 Hz), 123.29 (d, *J* = 8.1 Hz), 115.96 (d, *J* = 22.8 Hz), 113.57.

**<sup>19</sup>F NMR (376 MHz, CDCl<sub>3</sub>)** δ -115.03 – -117.87 (m).

**tert-butyl (2,5-dichloropyrimidin-4-yl)(4-fluorophenyl) carbamate (42).** To a solution of the 2,5-dichloro-N-(4-fluorophenyl) pyrimidin-4-amine (129 mg, 0.5 mmol, 1 equiv.) in THF was added DMAP (61 mg, 0.5 mmol, 1equiv.) and followed by the addition of Boc<sub>2</sub>O (218 mg, 1 mmol, 2 equiv.). The solution was stirred under room temperature for 2 h. After the solvent was removed, the residue was extracted with ethyl acetate and water. The organic phase was washed with water, 1N HCl solution, saturated brine, dried with Na<sub>2</sub>SO<sub>4</sub>, filtered, and concentrated in vacuo to give the title compound (146 mg, 82%) as a solid which was used without further purification.

**<sup>1</sup>H NMR (400 MHz, CDCl<sub>3</sub>)** δ 8.61 (s, 1H), 7.30 – 7.24 (m, 12), 7.11 – 7.01 (m, 2H), 1.46 (s, 9H).

**<sup>13</sup>C NMR (100 MHz, CDCl<sub>3</sub>)** δ 161.65 (d, *J* = 248.0 Hz), 159.97, 158.43, 151.52, 135.08 (d, *J* = 3.2 Hz), 129.44 (d, *J* = 8.7 Hz), 126.97, 116.07 (d, *J* = 22.9 Hz), 83.66, 27.92.

**<sup>19</sup>F NMR (376 MHz, CDCl<sub>3</sub>)** δ -113.50 – -113.63 (m).

**HRMS (EI):** Calculated for C<sub>15</sub>H<sub>14</sub>Cl<sub>2</sub>FN<sub>3</sub>O<sub>2</sub> [M]<sup>+</sup>: 357.0447 found: 357.0443

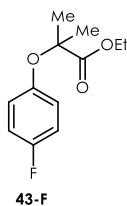

**Ethyl 2-(4-fluorophenoxy)-2-methylpropanoate (43-F).** The title compound was prepared from reported procedure<sup>23</sup>.

**<sup>1</sup>H NMR (400 MHz, CDCl<sub>3</sub>)** δ 6.95-6.88, (m, 2H), 6.79-6.87 (m, 2H), 4.22 (q, *J* = 7.2 Hz, 2H), 3.94 (s, 3H), 1.46(s, 6H), 1.26(t, *J* = 7.2 Hz, 3H).

**<sup>13</sup>C NMR (100 MHz, CDCl<sub>3</sub>)** δ 174.01, 158.31 (d, *J* = 239 Hz), 151.27 (d, *J* = 2.5 Hz), 121.25 (d, *J* = 8.1 Hz), 115.53 (d, *J* = 22.9 Hz), 79.71, 61.40, 25.25, 14.05.

**<sup>19</sup>F NMR (376 MHz, CDCl<sub>3</sub>)** δ -121.42 (ddd, *J* = 14.7, 8.3, 4.6 Hz).

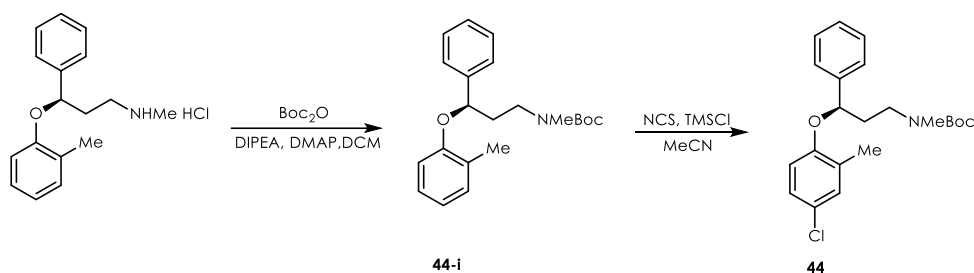

**(R)-tert-butyl methyl(3-phenyl-3-(o-tolyloxy) propyl) carbamate(44-i).** To the solution of atomoxetine hydrochloride (292 mg, 1mmol, 1 equiv.) in dichloromethane were added DIPEA (435 μl, 2.5 mmol, 2.5 equiv.) and DMAP (12.2 mg, 0.1 mmol, 0.1 equiv.) follow by the addition of Boc<sub>2</sub>O (262 mg, 1.2 mmol, 1.2 equiv.). The reaction was stirred under room temperature overnight. The reaction was extracted with ethyl acetate and water. The organic phase was washed with 1N HCl, water, saturated brine, dried over with Na<sub>2</sub>SO<sub>4</sub>, filtered and concentrated in vacuo to give the product as a colorless oil (quantitative yield) which used in the next step without further purification.

**<sup>1</sup>H NMR (400 MHz, CDCl<sub>3</sub>)** δ 7.42 – 7.27(m, 4H), 7.26-7.21 (m, 1H), 7.11 (d, *J* = 7.3 Hz, 1H), 6.95 – 6.90 (m, 1H), 6.77 (t, *J* = 7.1 Hz, 1H), 6.57 (d, *J* = 8.2 Hz, 1H), 5.15 (d, *J* = 4.4 Hz, 1H), 3.44 (s, 2H), 2.84 (s, 3H), 2.34 (s, 3H), 2.27 – 1.97 (m, 2H), 1.38 (s, 9H).

**<sup>13</sup>C NMR (100 MHz, CDCl<sub>3</sub>)** δ 155.76, 141.78, 130.57, 128.63, 127.49, 126.85, 126.53, 125.58, 120.21, 112.50, 79.33, 77.20, 45.97, 37.30, 34.41, 28.34, 16.52.

**HRMS (ESI):** Calculated for C<sub>22</sub>H<sub>30</sub>NO<sub>3</sub> (M+H)<sup>+</sup>: 356.2220; found: 356.2216

**tert-butyl (R)-(3-(4-chloro-2-methylphenoxy)-3-phenylpropyl) (methyl)carbamate (44).** Follow the reported method<sup>17</sup>, the title compound was purified as a colorless oil (323 mg, 83%) by silica gel column using ethyl acetate/ hexane (1/20).

**<sup>1</sup>H NMR (400 MHz, CDCl<sub>3</sub>)** δ 7.36 – 7.21 (m, 5H), 7.08 (d, *J* = 2.2 Hz, 1H), 6.89 (dd, *J* = 8.7, 2.6 Hz, 1H), 6.47 (d, *J* = 8.7 Hz, 1H), 5.10 (d, *J* = 4.2 Hz, 1H), 3.44 (s, 2H), 2.84 (s, 3H), 2.30 (s, 3H), 2.25 – 2.02 (m, 2H), 1.37 (s, 9H).

**<sup>13</sup>C NMR (100 MHz, CDCl<sub>3</sub>)** δ 155.71, 154.33, 141.23, 130.35, 128.73, 127.72, 126.13, 125.56, 124.91, 113.64, 79.40, 77.20, 45.88, 37.20, 34.43, 28.34, 16.40.

**HRMS (ESI):** Calculated for C<sub>22</sub>H<sub>29</sub>ClNO<sub>3</sub> (M+H)<sup>+</sup>: 390.1830; found: 390.1826

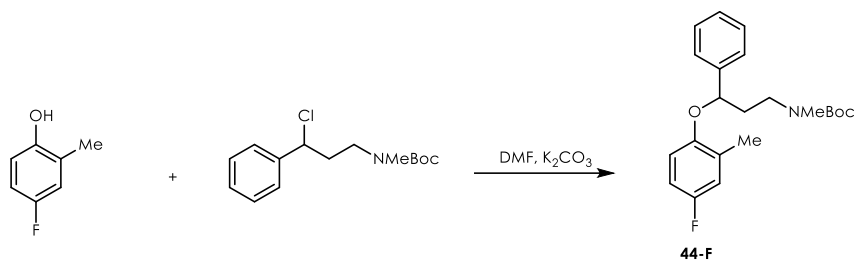

**tert-butyl (3-(4-fluoro-2-methylphenoxy)-3-phenylpropyl) (methyl)carbamate (44-F).** To a solution of tert-butyl (3-chloro-3-phenylpropyl) (methyl)carbamate (284 mg, 1 mmol, 1 equiv.) in DMF were added 4-fluoro-2-methylphenol (256 mg, 2 mmol, 2 equiv.) and potassium carbonate (276 mg, 2 mmol, 2 equiv.). The reaction was stirred under 100°C overnight and then extracted with ethyl acetate and water. The organic phase was washed with water, NaOH solution (10%, w/w), water, saturated brine, dried with Na<sub>2</sub>SO<sub>4</sub>, filtered, and concentrated in vacuo to give residue which was purified by silica gel chromatography with ethyl acetate/ hexane (1/20) to afford the title compound as a colorless oil (82 mg, 22%).

**<sup>1</sup>H NMR (400 MHz, CDCl<sub>3</sub>)** δ 7.40 – 7.21 (m, 5H), 6.83 (dd, *J* = 8.9, 2.8 Hz, 1H), 6.61 (td, *J* = 8.5, 3.0 Hz, 1H), 6.47 (dd, *J* = 8.8, 4.6 Hz, 1H), 5.07 (dd, *J* = 8.3, 3.8 Hz, 1H), 3.44 (br, 2H), 2.84 (s, 3H), 2.31 (s, 3H), 2.24 – 1.98 (m, 2H), 1.37 (s, 9H).

**<sup>13</sup>C NMR (100 MHz, CDCl<sub>3</sub>)** δ 156.62 (d, *J* = 236.7 Hz), 155.72, 151.80, 141.47, 128.68, 127.65, 125.62, 117.23 (d, *J* = 22.5 Hz), 113.22, 112.15 (d, *J* = 22.4 Hz), 79.37, 77.20, 45.90, 37.17, 34.36, 28.33, 16.59.

**<sup>19</sup>F NMR (376 MHz, CDCl<sub>3</sub>)** δ -124.73.

**HRMS (ESI):** Calculated for C<sub>22</sub>H<sub>29</sub>FNO<sub>3</sub> (M+H)<sup>+</sup>: 374.2126; found: 374.2121

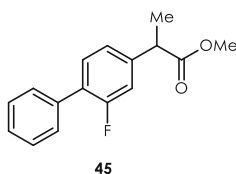

**methyl 2-(2-fluoro-[1,1'-biphenyl]-4-yl) propanoate (45).** The title compound was prepared from reported procedure. Spectral data matched literature data<sup>24</sup>.

**<sup>1</sup>H NMR (400 MHz, CDCl<sub>3</sub>)** δ 7.61 – 7.52 (m, 2H), 7.49 – 7.34 (m, 4H), 7.20 – 7.12 (m, 2H), 3.79 (q, *J*

= 7.2 Hz, 1H), 3.72 (s, 3H), 1.56 (d,  $J = 7.2$  Hz, 3H).

**$^{13}\text{C}$  NMR (100 MHz,  $\text{CDCl}_3$ )**  $\delta$  174.35, 159.62 (d,  $J = 248.4$  Hz), 141.75 (d,  $J = 7.7$  Hz), 135.42 (d,  $J = 1.2$  Hz), 130.76 (d,  $J = 4.0$  Hz), 128.87 (d,  $J = 2.9$  Hz), 128.37, 127.78 (d,  $J = 13.5$  Hz), 127.59, 123.46 (d,  $J = 3.3$  Hz), 115.17 (d,  $J = 23.7$  Hz), 52.12, 44.84 (d,  $J = 1.3$  Hz), 18.37.

**$^{19}\text{F}$  NMR (376 MHz,  $\text{CDCl}_3$ )**  $\delta$  -117.51 – -117.62 (m, 1H).

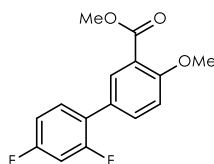

46

**methyl 2',4'-difluoro-4-methoxy-[1,1'-biphenyl]-3-carboxylate (46)**. The title compound was obtained as a white solid from reported procedure<sup>25</sup>. Spectral data matched literature data.

**$^1\text{H}$  NMR (400 MHz,  $\text{CDCl}_3$ )**  $\delta$  7.93 (dd,  $J = 2.2, 1.0$  Hz, 1H), 7.64 – 7.58 (m, 1H), 7.38 (td,  $J = 8.7, 6.5$  Hz, 1H), 7.05 (d,  $J = 8.7$  Hz, 1H), 6.98 – 6.85 (m, 2H), 3.95 (s, 3H), 3.90 (s, 3H).

**$^{13}\text{C}$  NMR (100 MHz,  $\text{CDCl}_3$ )**  $\delta$  166.34, 162.15 (dd,  $J = 249.0, 11.9$  Hz), 159.63 (dd,  $J = 250.2, 11.8$  Hz), 158.67, 133.83 (d,  $J = 3.4$  Hz), 132.01 (d,  $J = 2.4$  Hz), 131.08 (dd,  $J = 9.4, 4.8$  Hz), 126.90 (d,  $J = 1.2$  Hz), 123.93 (dd,  $J = 13.7, 3.9$  Hz), 120.11, 112.13, 111.58 (dd,  $J = 21.1, 3.8$  Hz), 104.35 (dd,  $J = 26.6, 25.3$  Hz), 56.13, 52.11.

**$^{19}\text{F}$  NMR (376 MHz,  $\text{CDCl}_3$ )**  $\delta$  -111.42 (dt,  $J = 15.4, 7.7$  Hz, 1H), -113.74 (dd,  $J = 17.5, 8.8$  Hz, 1H).

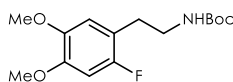

47-F

**tert-butyl (2-fluoro-4,5-dimethoxyphenethyl) carbamate (47-F)**. To a 25 ml round bottom flask with stir bar was added 2-(2-fluoro-4,5-dimethoxyphenyl) ethan-1-amine (173 mg, 0.87 mmol, 1 equiv.) prepared from reported literature<sup>26</sup> and triethylamine (176 mg, 1.74 mmol, 2 equiv.) dissolved in dichloromethane. The flask was sealed with a rubber septum and cooled to 0 °C for 5 minutes, di-tert-butyl decarbonate (228 mg, 1.04 mmol, 1.2 equiv.) was then added. The reaction was stirred at 0 °C for 15 minutes, then warmed to room temperature and stirred overnight. The reaction was quenched with brine and diluted with dichloromethane. After separation, the aqueous layer was extracted with dichloromethane. The combined organic layers were dried over  $\text{Na}_2\text{SO}_4$  and concentrated in vacuo. The title compound was isolated as a brown solid (165.4 mg, 64%).

**$^1\text{H}$  NMR (400 MHz,  $\text{CDCl}_3$ )**  $\delta$  6.65 (d,  $J = 6.8$  Hz, 1H), 6.61 (d,  $J = 11.0$  Hz, 1H), 4.58 (s, 1H), 3.89 – 3.74 (m, 6H), 3.33 (q,  $J = 6.0$  Hz, 2H), 2.76 (t,  $J = 7.0$  Hz, 2H), 1.42 (s, 9H).

**$^{13}\text{C}$  NMR (100 MHz,  $\text{CDCl}_3$ )**  $\delta$  156.34, 154.92 (d,  $J = 189.0$  Hz), 148.31 (d,  $J = 9.2$  Hz), 145.09 (d,  $J = 2.6$  Hz), 116.13 (d,  $J = 17.6$  Hz), 113.12 (d,  $J = 6.6$  Hz), 100.09 (d,  $J = 28.5$  Hz), 79.22, 56.25 (d,  $J = 28.9$  Hz), 40.77, 29.20, 28.38.

$^{19}\text{F}$  NMR (376 MHz,  $\text{CDCl}_3$ )  $\delta$  -125.86 – -126.21 (m).

HRMS (ESI): Calculated for  $\text{C}_{10}\text{H}_{15}\text{FNO}_2$  ( $\text{M}+\text{H}$ ) $^+$ : 200.1081; found: 274.1075

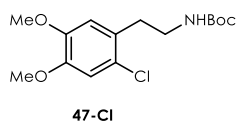

**tert-butyl (2-chloro-4,5-dimethoxyphenethyl) carbamate (47-Cl).** The title compound was obtained as a white solid from reported procedure<sup>14</sup>. Spectral data matched literature value.

$^1\text{H}$  NMR (400 MHz,  $\text{CDCl}_3$ )  $\delta$  6.85 (s, 1H), 6.71 (s, 1H), 4.77 – 4.17 (m, 1H), 3.85 (s, 3H), 3.85 (s, 3H), 3.36 (d,  $J$  = 6.7 Hz, 2H), 2.86 (t,  $J$  = 7.0 Hz, 2H), 1.43 (s, 9H).

$^{13}\text{C}$  NMR (100 MHz,  $\text{CDCl}_3$ )  $\delta$  155.85, 148.11, 147.76, 128.32, 124.89, 113.38, 112.56, 79.19, 56.10, 56.07, 40.32, 33.53, 28.38.

### General procedure to synthesize substrates 48 to 50 and fluorine standards (48-F to 49-F) (General procedure A)

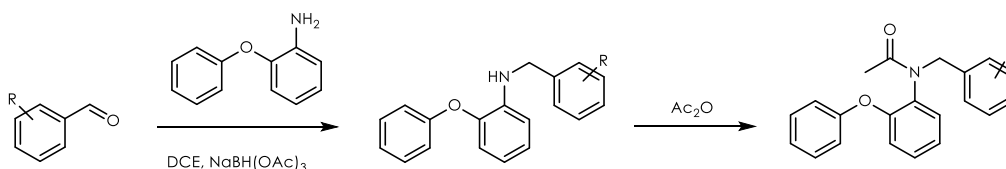

To the solution of the aldehyde (1 mmol, 1 equiv.) in 1,2-dichloroethane (DCE) was added 2-phenoxyaniline (222 mg, 1.2 mmol, 1.2 eq). The solution was stirred under room temperature for 30 min. and  $\text{NaBH}(\text{OAc})_3$  (424 mg, 2 mmol, 2 equiv.) was then added in portion at 0°C. The resulting solution was warmed to room temperature and stirred for additional 3 h. After fully conversion of the aldehyde (monitored by TLC), 1,2-dichloroethane (DCE) was removed under reduce pressure. The residue was extracted with ethyl acetate and water. The organic phase was washed with 1N HCl, saturated brine, dried with  $\text{Na}_2\text{SO}_4$ , filtered, and concentrated in vacuo to give the crude intermediate which were then dissolved in 5 ml acetic anhydride. This solution was then stirred under room temperature for 5 h. After fully conversion of the amine intermediate, most of the acetic anhydride was removed under reduce pressure. The residue was dissolve in ethyl acetate and washed with 10% (w/w) NaOH solution, 1N HCl, water, saturated brine, dried with  $\text{Na}_2\text{SO}_4$ , filtered, and concentrated in vacuo to give the crude product which was then purified by silica gel column with ethyl acetate/ hexane (20% to 50%) as the eluant to afford the target compound as a colorless oil or white solid.

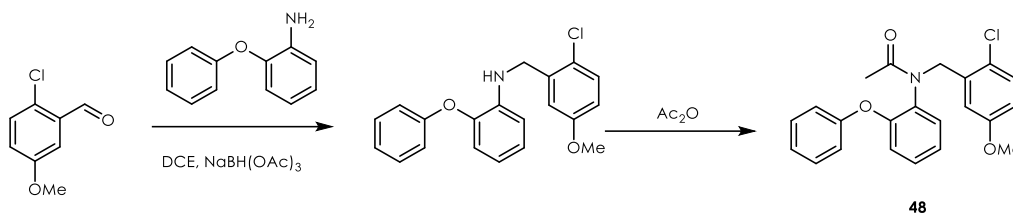

**N-(2-chloro-5-methoxybenzyl)-N-(2-phenoxyphenyl) acetamide (48).** Follow the general procedure **A**, the title compound was obtained as a white solid (313 mg, 82%) from 2-chloro-5-methoxybenzaldehyde.

**<sup>1</sup>H NMR (400 MHz, CDCl<sub>3</sub>)** δ 7.38 – 7.28 (m, 2H), 7.21 (ddd, *J* = 8.3, 7.5, 1.8 Hz, 1H), 7.16 – 7.10 (m, 2H), 7.08 (dd, *J* = 7.9, 1.7 Hz, 1H), 7.04 (d, *J* = 3.1 Hz, 1H), 7.00 (td, *J* = 7.6, 1.3 Hz, 1H), 6.93 – 6.88 (m, 2H), 6.86 (dd, *J* = 8.3, 1.3 Hz, 1H), 6.67 (dd, *J* = 8.8, 3.1 Hz, 1H), 5.22 (d, *J* = 15.0 Hz, 1H), 4.79 (d, *J* = 15.0 Hz, 1H), 3.66 (s, 3H), 1.99 (s, 3H).

**<sup>13</sup>C NMR (100 MHz, CDCl<sub>3</sub>)** δ 171.15, 158.30, 155.78, 153.43, 135.85, 132.71, 130.18, 129.85, 129.72, 129.30, 125.12, 124.04, 123.42, 119.16, 118.47, 115.94, 114.55, 55.39, 48.86, 22.08.

**HRMS (ESI):** Calculated for C<sub>22</sub>H<sub>21</sub>ClNO<sub>3</sub> (M+H)<sup>+</sup>: 382.1204; found: 382.1200.

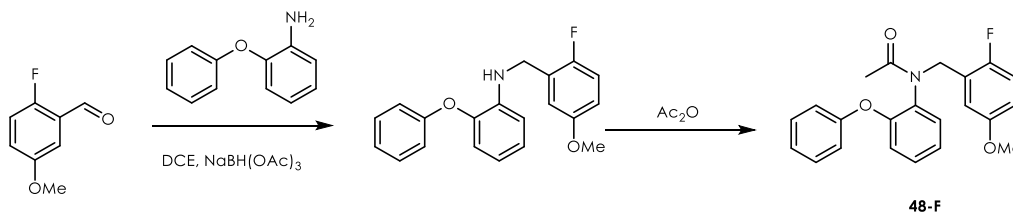

**N-(2-fluoro-5-methoxybenzyl)-N-(2-phenoxyphenyl) acetamide (48-F).** Follow the general procedure **A**, the title compound was obtained as a colorless oil from 2-fluoro-5-methoxybenzaldehyde and gradually solidify after stay (259 mg, 71%).

**<sup>1</sup>H NMR (400 MHz, CDCl<sub>3</sub>)** δ 7.37 – 7.27 (m, 2H), 7.24 – 7.18 (m, 1H), 7.13 (t, *J* = 7.4 Hz, 1H), 7.06 – 6.97 (m, 2H), 6.96 (dd, *J* = 5.9, 3.2 Hz, 1H), 6.91 – 6.83 (m, 3H), 6.81 (t, *J* = 9.1 Hz, 1H), 6.72 – 6.63 (m, 1H), 5.13 (d, *J* = 14.6 Hz, 1H), 4.72 (d, *J* = 14.6 Hz, 1H), 3.66 (s, 3H), 1.96 (s, 3H).

**<sup>13</sup>C NMR (100 MHz, CDCl<sub>3</sub>)** δ 171.13, 155.82, 155.53 (d, *J* = 2.0 Hz), 155.39 (d, *J* = 238 Hz), 153.42, 132.65, 130.17, 129.83, 129.30, 124.86 (d, *J* = 16.5 Hz), 124.00, 123.37, 119.11, 118.48, 115.70 (d, *J* = 3.8 Hz), 115.46 (d, *J* = 23.9 Hz), 114.50 (d, *J* = 8.0 Hz), 55.63, 44.85 (d, *J* = 3.1 Hz), 22.11.

**<sup>19</sup>F NMR (376 MHz, CDCl<sub>3</sub>)** δ -129.80 – -129.92 (m).

**HRMS (ESI):** Calculated for C<sub>22</sub>H<sub>21</sub>FNO<sub>3</sub> (M+H)<sup>+</sup>: 366.1500; found: 366.1497.

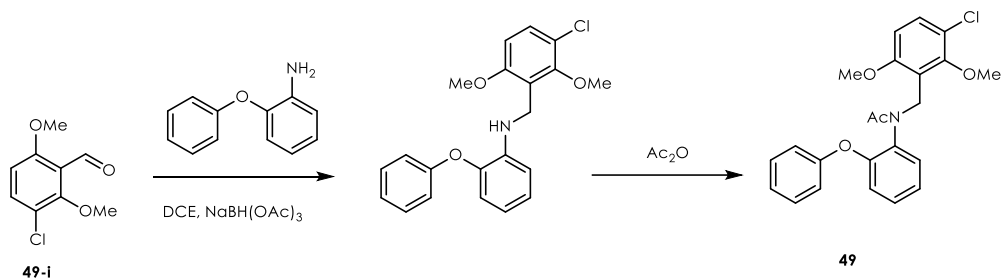

**N-(3-chloro-2,6-dimethoxybenzyl)-N-(2-phenoxyphenyl) acetamide (49).** Follow the general procedure **A**, the title compound was obtained as a colorless oil (362 mg, 88%) from 3-chloro-2,6-dimethoxybenzaldehyde (**49-i**).

**<sup>1</sup>H NMR (400 MHz, CDCl<sub>3</sub>)** δ 7.36 – 7.28 (m, 2H), 7.17 (d, *J* = 8.9 Hz, 1H), 7.15 – 7.09 (m, 2H), 6.92 – 6.84 (m, 3H), 6.82 (dd, *J* = 7.8, 1.7 Hz, 1H), 6.76 (d, *J* = 8.3 Hz, 1H), 6.42 (d, *J* = 8.9 Hz, 1H), 5.33 (d, *J* = 13.5 Hz, 1H), 4.85 (d, *J* = 13.5 Hz, 1H), 3.69 (s, 3H), 3.50 (s, 3H), 1.90 (s, 3H).

**<sup>13</sup>C NMR (100 MHz, CDCl<sub>3</sub>)** δ 170.23, 158.14, 155.99, 155.72, 154.31, 131.92, 130.82, 129.78, 129.53, 129.00, 124.02, 122.54, 120.56, 119.51, 119.36, 117.49, 106.89, 60.98, 55.60, 39.30, 22.27.

**HRMS (ESI):** Calculated for C<sub>23</sub>H<sub>23</sub>ClNO<sub>4</sub> (M+H)<sup>+</sup>: 412.1310; found: 412.1305.

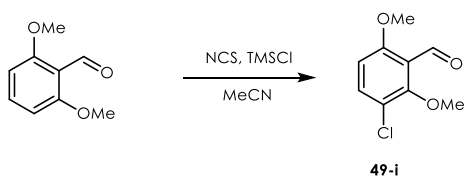

**3-chloro-2,6-dimethoxybenzaldehyde(49-i).** The title compound was prepared from reported chlorination procedure<sup>7</sup>. The crude product was purified by silica gel chromatography purification with ethyl acetate/ hexane (1/10) and give the title compound as a light brown solid (476mg, 79%).

**<sup>1</sup>H NMR (400 MHz, CDCl<sub>3</sub>)** δ 10.41 (s, 1H), 7.50 (d, *J* = 9.0 Hz, 1H), 6.72 (d, *J* = 9.0 Hz, 1H), 3.92 (s, 3H), 3.89 (s, 3H).

**<sup>13</sup>C NMR (100 MHz, CDCl<sub>3</sub>)** δ 188.58, 160.46, 157.95, 135.65, 120.44, 120.27, 108.17, 62.47, 56.29.

**HRMS (ESI):** Calculated for C<sub>9</sub>H<sub>10</sub>ClO<sub>3</sub> (M+H)<sup>+</sup>: 201.0313; found: 201.0311.

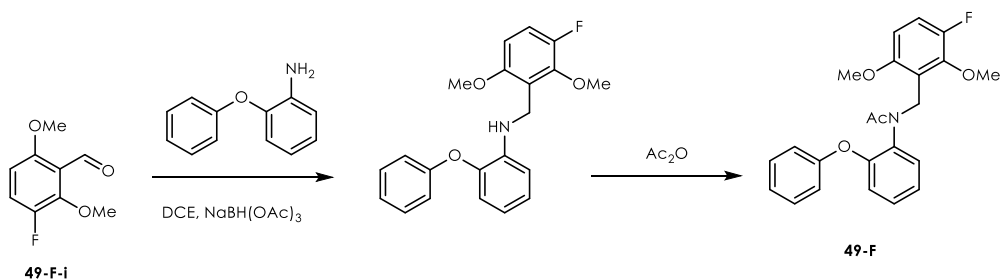

**N-(3-fluoro-2,6-dimethoxybenzyl)-N-(2-phenoxyphenyl)acetamide(49-F).** Follow the general



procedure **A**, the title compound was obtained as a colorless oil (253 mg, 64%) from 3-fluoro-2,6-dimethoxybenzaldehyde (**49-F-i**).

**<sup>1</sup>H NMR (400 MHz, CDCl<sub>3</sub>)** δ 7.37 – 7.29 (m, 2H), 7.16 – 7.09 (m, 2H), 6.93 – 6.82 (m, 5H), 6.76 (dd, *J* = 8.3, 1.0 Hz, 1H), 6.33 (dd, *J* = 9.1, 3.6 Hz, 1H), 5.28 (d, *J* = 13.3 Hz, 1H), 4.86 (d, *J* = 13.3 Hz, 1H), 3.67 (d, *J* = 2.1 Hz, 3H), 3.52 (s, 3H), 1.90 (s, 3H).

**<sup>13</sup>C NMR (100 MHz, CDCl<sub>3</sub>)** δ 170.14, 155.73, 154.97 (d, *J* = 1.8 Hz), 154.34 (s, 3H), 149.94 (d, *J* = 238 Hz), 147.25 (d, *J* = 11.5 Hz), 132.02, 130.83, 129.77, 128.92, 124.02, 122.49, 119.55, 117.41, 115.54, 115.34, 104.66 (d, *J* = 7.4 Hz), 61.03 (d, *J* = 6.7 Hz), 55.73, 39.03 (d, *J* = 2.2 Hz), 22.28.

**<sup>19</sup>F NMR (376 MHz, CDCl<sub>3</sub>)** δ -139.63 – -139.81 (m).

**HRMS (ESI):** Calculated for C<sub>23</sub>H<sub>23</sub>FNO<sub>4</sub> (M+H)<sup>+</sup>: 396.1606; found: 396.1601

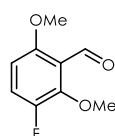

**49-F-i**

**3-fluoro-2,6-dimethoxybenzaldehyde (49-F-i).** To a solution of 2,6-dimethoxybenzaldehyde (332mg, 2 mmol) in acetonitrile was added selectfluor (779 mg, 2.2 mmol, 1.1 equiv.) at -40 °C. The solution was stirred overnight and then extracted with ethyl acetate and water. The organic phase was washed with water, saturated brine, dried over with Na<sub>2</sub>SO<sub>4</sub>, filtered and concentrated in vacuo to give the crude product which was purified by silica gel chromatography with ethyl acetate/hexane (1/4) as the eluant to give the title compound as yellow to brown oil (295 mg, 80%).

**<sup>1</sup>H NMR (400 MHz, CDCl<sub>3</sub>)** δ 10.41 (d, *J* = 1.0 Hz, 1H), 7.24 (dd, *J* = 11.0, 9.2 Hz, 1H), 6.60 (dd, *J* = 9.2, 3.3 Hz, 1H), 4.01 (d, *J* = 2.3 Hz, 3H), 3.87 (s, 3H).

**<sup>13</sup>C NMR (100 MHz, CDCl<sub>3</sub>)** δ 188.77 (d, *J* = 2.7 Hz), 157.25 (d, *J* = 1.8 Hz), 149.56 (d, *J* = 11.6 Hz), 149.42 (d, *J* = 241.4 Hz), 122.17 (d, *J* = 21.0 Hz), 119.17, 105.87 (d, *J* = 6.8 Hz), 62.25 (d, *J* = 6.4 Hz), 56.31.

**<sup>19</sup>F NMR (376 MHz, CDCl<sub>3</sub>)** δ -139.72 – -139.88 (m).

**HRMS (ESI):** Calculated for C<sub>9</sub>H<sub>10</sub>FO<sub>3</sub> (M+H)<sup>+</sup>: 185.0608; found: 185.0609.

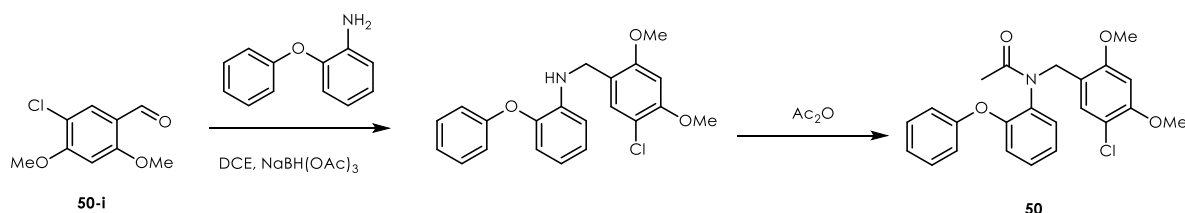

**N-(5-chloro-2,4-dimethoxybenzyl)-N-(2-phenoxyphenyl) acetamide (50).** Follow the general procedure **A**, the title compound was obtained as a white solid (311 mg, 76%) from 5-chloro-

2,4-dimethoxybenzaldehyde (**50-i**).

**<sup>1</sup>H NMR (400 MHz, CDCl<sub>3</sub>)** δ 7.37 – 7.28 (m, 3H), 7.21 – 7.15 (m, 1H), 7.12 (t, *J* = 7.4 Hz, 1H), 7.04 – 6.95 (m, 2H), 6.89 (dt, *J* = 9.2, 1.9 Hz, 2H), 6.86 (dd, *J* = 8.3, 1.0 Hz, 1H), 6.30 (s, 1H), 4.99 (d, *J* = 14.6 Hz, 1H), 4.70 (d, *J* = 14.6 Hz, 1H), 3.84 (s, 3H), 3.57 (s, 3H), 1.93 (s, 3H).

**<sup>13</sup>C NMR (100 MHz, CDCl<sub>3</sub>)** δ 170.84, 157.13, 155.87, 154.86, 153.42, 133.03, 131.60, 130.30, 129.77, 128.97, 123.88, 123.12, 119.05, 118.66, 118.40, 113.28, 96.18, 56.19, 55.56, 45.22, 22.22.

**<sup>19</sup>F NMR (376 MHz, CDCl<sub>3</sub>)** δ -142.91 (dd, *J* = 10.3, 7.3 Hz).

**HRMS (ESI):** Calculated for C<sub>23</sub>H<sub>23</sub>ClNO<sub>4</sub> (M+H)<sup>+</sup>: 412.1310; found: 412.1306.

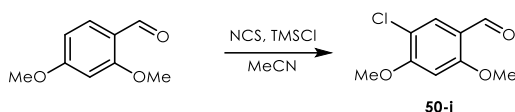

**5-chloro-2,4-dimethoxybenzaldehyde (50-i).** The title compound was prepared from reported chlorination procedure<sup>7</sup>. The crude product after work-up was purified by stirring in the ethyl acetate/ hexane (1/10) solution. The title compound was obtained as a white solid after filtration (605 mg, 75%).

**<sup>1</sup>H NMR (400 MHz, CDCl<sub>3</sub>)** δ 10.25 (s, 1H), 7.83 (s, 1H), 6.47 (s, 1H), 3.98 (s, 3H), 3.95 (s, 3H).

**<sup>13</sup>C NMR (100 MHz, CDCl<sub>3</sub>)** δ 187.18, 162.34, 160.81, 129.71, 118.75, 115.35, 95.65, 56.42, 56.00

**HRMS (EI):** Calculated for C<sub>9</sub>H<sub>9</sub>ClO<sub>3</sub> [M]<sup>+</sup>: 200.0240; found: 200.0236

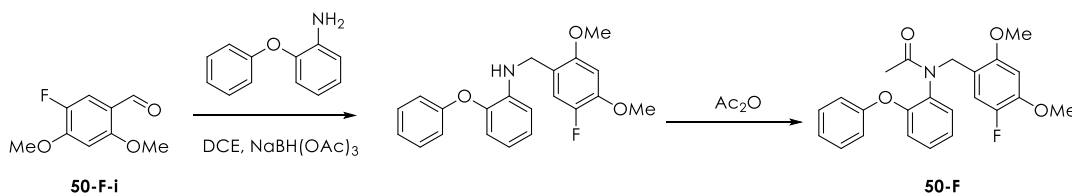

**N-(5-fluoro-2,4-dimethoxybenzyl)-N-(2-phenoxyphenyl) acetamide (50-F).** Follow the general procedure **A**, the title compound was obtained as a colorless oil (359 mg, 91%) from 5-fluoro-2,4-dimethoxybenzaldehyde (**50-F-i**).

**<sup>1</sup>H NMR (400 MHz, CDCl<sub>3</sub>)** δ 7.36 – 7.28 (m, 2H), 7.22 – 7.15 (m, 1H), 7.15 – 7.08 (m, 2H), 7.04 – 6.94 (m, 2H), 6.90 (dd, *J* = 9.9, 2.2 Hz, 2H), 6.87 – 6.82 (m, 1H), 6.35 (d, *J* = 7.1 Hz, 1H), 5.01 (d, *J* = 14.6 Hz, 1H), 4.68 (d, *J* = 14.6 Hz, 1H), 3.84 (s, 3H), 3.54 (s, 3H), 1.94 (s, 3H).

**<sup>13</sup>C NMR (100 MHz, CDCl<sub>3</sub>)** δ 170.91, 155.91, 153.76 (d, *J* = 2.1 Hz), 153.39, 146.91 (d, *J* = 11.8 Hz), 146.56 (d, *J* = 236.5 Hz), 133.13, 130.28, 129.79, 128.98, 123.91, 123.16, 119.04, 118.46, 117.85 (d, *J* = 19.9 Hz), 117.83 (d, *J* = 5.7 Hz), 98.00 (d, *J* = 1.8 Hz), 56.60, 55.96, 45.30, 22.19.

**<sup>19</sup>F NMR (376 MHz, CDCl<sub>3</sub>)** δ -145.34 – -145.45(m).

**HRMS (ESI):** Calculated for C<sub>23</sub>H<sub>23</sub>FNO<sub>4</sub> (M+H)<sup>+</sup>: 396.1606; found: 396.1601

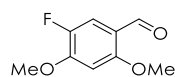

**50-F-i**

**5-fluoro-2,4-dimethoxybenzaldehyde (50-F-i).** The title compound was prepared from reported literature<sup>27</sup>.

**<sup>1</sup>H NMR (400 MHz, CDCl<sub>3</sub>)** δ 10.28 (d, *J* = 3.2 Hz, 1H), 7.54 (d, *J* = 11.2 Hz, 1H), 6.51 (d, *J* = 6.5 Hz, 1H), 3.97 (s, 3H), 3.93 (s, 3H).

**<sup>13</sup>C NMR (100 MHz, CDCl<sub>3</sub>)** δ 188.77 (d, *J* = 2.7 Hz), 157.25 (d, *J* = 1.8 Hz), 149.56 (d, *J* = 11.6 Hz), 149.42 (d, *J* = 241.4 Hz), 122.17 (d, *J* = 21.0 Hz), 119.17 (d, *J* = 1.2 Hz), 105.87 (d, *J* = 6.8 Hz), 62.25 (d, *J* = 6.4 Hz), 56.31.

**<sup>19</sup>F NMR (376 MHz, CDCl<sub>3</sub>)** δ -139.72 – -139.88 (m).

**HRMS (ESI):** Calculated for C<sub>9</sub>H<sub>10</sub>FO<sub>3</sub> (M+H)<sup>+</sup>: 185.0608; found: 185.0607.

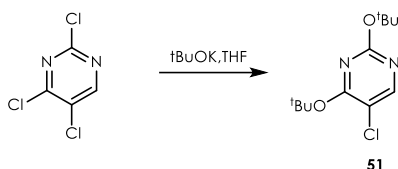

**51**

**2,4-di-tert-butoxy-5-chloropyrimidine (51).** To a solution of 2,4,5-trichloropyrimidine (550 mg, 3 mmol, 1 equiv.) in anhydrous THF was added potassium tert-butoxide (tBuOK, 1.34 g, 12 mmol, 4 equiv.) portion-wise at 0°C. The reaction was warm to room temperature and stirred for additional 5h. The reaction was quenched by addition of water and extracted with ethyl acetate. The organic phase was washed with water, saturated brine, dried over with Na<sub>2</sub>SO<sub>4</sub>, filtered and concentrated in vacuo to give the crude product which purified by silica gel chromatography using ethyl acetate/hexane (0% to 5%) to afford the title compound as white solid (498 mg, 64%).

**<sup>1</sup>H NMR (400 MHz, CDCl<sub>3</sub>)** δ 8.13 (s, 1H), 1.65 (s, 9H), 1.59 (s, 9H).

**<sup>13</sup>C NMR (100 MHz, CDCl<sub>3</sub>)** δ 164.93, 162.14, 156.27, 111.09, 83.19, 80.72, 28.33, 28.29.

**HRMS (ESI):** Calculated for C<sub>12</sub>H<sub>20</sub>ClN<sub>2</sub>O<sub>2</sub><sup>+</sup> (M+H)<sup>+</sup>: 259.1208; found: 259.1204.

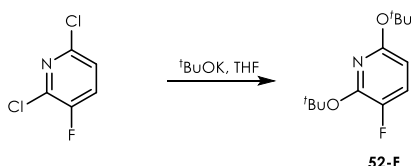

**52-F**

**2,4-di-tert-butoxy-5-fluoropyrimidine (52-F).** Follow the preparation procedure of compound **51**, the title compound was obtained as a colorless liquid (100 mg, 42%) from 2,4-dichloro-5-fluoropyrimidine. Spectral data matched literature data<sup>15</sup>.

**<sup>1</sup>H NMR (400 MHz, CDCl<sub>3</sub>)** δ 8.00 (d, *J* = 2.6 Hz, 1H), 1.65 (s, 9H), 1.58 (s, 9H).

**<sup>13</sup>C NMR (100 MHz, CDCl<sub>3</sub>)** δ 158.96 (d, *J* = 3.4 Hz), 158.74 (d, *J* = 10.1 Hz), 143.46 (d, *J* = 252.2 Hz), 142.93 (d, *J* = 20.9 Hz), 83.14, 80.36, 28.37, 28.31.

**<sup>19</sup>F NMR (376 MHz, CDCl<sub>3</sub>)** δ -163.58 (d, *J* = 2.6 Hz).

### General procedure to synthesize tyrosine and DOPA derivatives (General procedure B)

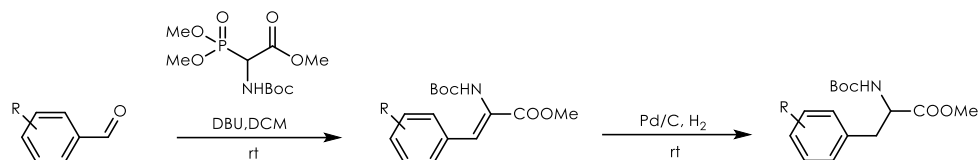

Follow the reported procedure<sup>28</sup>, to a solution of methyl 2-((*tert*-butoxycarbonyl) amino)-2-(dimethoxyphosphoryl) acetate (713 mg, 2.4 mmol, 1.2 equiv.) in 10 ml dry dichloromethane, was added DBU (358 ml, 2.4 mmol, 1.2 equiv.). The mixture solution was stirred at room temperature for 5 minutes. Then the aldehyde (2 mmol, 1 equiv.) in 5 ml dichloromethane was added dropwise to the solution. The reaction was monitored by TLC. After the reaction is finished (usually in 3 to 4h.), the solution was concentrated and extracted with ethyl acetate and water. The organic phase was separated and washed with 1N HCl, saturated brine, dried with Na<sub>2</sub>SO<sub>4</sub>, filtered and concentrated in vacuo to give the crude product which was then purified by silica gel column with ethyl acetate/ hexane (10% to 20%) or stirred in the ethyl acetate/ hexane when solid crude products were obtained to give the intermediate in 65-90% yield. To a round bottomed flask equipped with a stir bar was added the intermediate obtained above (1 mmol, 1.0 equiv.), which was then dissolved in 20 ml of methanol (THF or EA was added when the material is not soluble in methanol). 10% Pd/C (30-40 mg) was added to the solution and the reaction was placed under N<sub>2</sub>. The solution was purged and backfilled with H<sub>2</sub> and then stirred under H<sub>2</sub> atmosphere (1 atm) overnight at room temperature (reaction is typically done in about 2-3 hours). Once the reaction was complete, the solution was passed through a Celite plug and concentrated. The crude mixture was then purified by either silica gel chromatography or flash LC using ethyl acetate/ hexane (1/10 to 2/10) to yield the tyrosine derivatives in 90-98% yield.

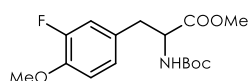

54

**methyl 2-((*tert*-butoxycarbonyl)amino)-3-(3-fluoro-4-methoxyphenyl)propanoate (54)**. Follow the general procedure **B**, the title compound was obtained as a white solid from 3-fluoro-4-methoxybenzaldehyde.

**<sup>1</sup>H NMR (400 MHz, CDCl<sub>3</sub>)** δ 6.99 – 6.67 (m, 3H), 5.10 – 4.65 (m, 1H), 4.58 – 4.28 (m, 1H), 3.86 (s, 3H), 3.72 (s, 3H), 3.15 – 2.76 (m, 1H), 1.42 (s, 9H).

**<sup>13</sup>C NMR (100 MHz, CDCl<sub>3</sub>)** δ 172.10, 154.99, 152.13 (d, *J* = 245.8 Hz), 146.57, 128.93 (d, *J* = 6.1 Hz), 124.96, 116.98 (d, *J* = 18.2 Hz), 113.41 (d, *J* = 2.0 Hz), 80.02, 56.23, 54.36, 52.27, 37.40, 28.26.

**<sup>19</sup>F NMR (376 MHz, CDCl<sub>3</sub>)** δ -134.80 – -135.40 (m).

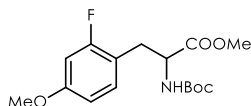

55

**methyl 2-((tert-butoxycarbonyl)amino)-3-(2-fluoro-4-methoxyphenyl)propanoate (55).** Follow the general procedure **B**, the title compound was obtained as a white solid from 2-fluoro-4-methoxybenzaldehyde.

**<sup>1</sup>H NMR (400 MHz, CDCl<sub>3</sub>)** δ 7.02 (t, *J* = 8.5 Hz, 1H), 6.69 – 6.48 (m, 2H), 5.11 – 4.64 (m, 1H), 4.62 – 4.23 (m, 1H), 3.76 (s, 3H), 3.71 (s, 3H), 3.19 – 2.75 (m, 2H), 1.40 (s, 9H).

**<sup>13</sup>C NMR (100 MHz, CDCl<sub>3</sub>)** δ 172.28, 161.82 (d, *J* = 245.1 Hz), 160.03 (d, *J* = 10.6 Hz), 155.00, 131.84 (d, *J* = 6.5 Hz), 114.78 (d, *J* = 16.6 Hz), 109.88 (d, *J* = 3.0 Hz), 101.51 (d, *J* = 26.1 Hz), 79.81, 55.49, 53.74, 52.27, 31.28, 28.25.

**<sup>19</sup>F NMR (376 MHz, CDCl<sub>3</sub>)** δ -115.45 – -115.65 (m).

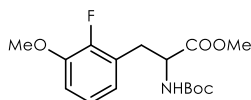

56

**methyl 2-((tert-butoxycarbonyl)amino)-3-(2-fluoro-3-methoxyphenyl)propanoate (56).** Follow the general procedure **B**, the title compound was obtained as a white solid from 2-fluoro-3-methoxybenzaldehyde.

**<sup>1</sup>H NMR (400 MHz, CDCl<sub>3</sub>)** δ 6.99 (td, *J* = 8.0, 1.4 Hz, 1H), 6.86 (t, *J* = 7.5 Hz, 1H), 6.72 (t, *J* = 6.7 Hz, 1H), 5.15 – 4.70 (m, 1H), 4.64 – 4.37 (m, 1H), 3.86 (s, 3H), 3.73 (s, 3H), 3.26 – 2.86 (m, 2H), 1.40 (s, 9H).

**<sup>13</sup>C NMR (100 MHz, CDCl<sub>3</sub>)** δ 172.15, 155.03, 151.12 (d, *J* = 244.9 Hz), 147.68 (d, *J* = 11.2 Hz), 124.03 (d, *J* = 13.4 Hz), 123.77 (d, *J* = 4.6 Hz), 122.73 (d, *J* = 3.4 Hz), 112.19, 79.88, 56.18, 53.64, 52.35, 31.55, 28.24.

**<sup>19</sup>F NMR (376 MHz, CDCl<sub>3</sub>)** δ -140.36 (t, *J* = 6.9 Hz).

**HRMS (ESI):** Calculated for C<sub>11</sub>H<sub>15</sub>NO<sub>3</sub>F (M+H)<sup>+</sup>: 228.1030; found: 228.1028.

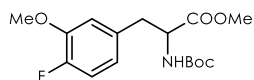

57

**methyl 2-((tert-butoxycarbonyl) amino)-3-(4-fluoro-3-methoxyphenyl) propanoate (57).**

Follow the general procedure **B**, the title compound was obtained as a white solid from 4-fluoro-3-methoxybenzaldehyde.

**<sup>1</sup>H NMR (400 MHz, CDCl<sub>3</sub>)** δ 6.98 (dd, *J* = 11.2, 8.2 Hz, 1H), 6.72 (dd, *J* = 8.1, 2.0 Hz, 1H), 6.68 – 6.56 (m, 1H), 5.05 – 4.67 (m, 1H), 4.64 – 4.22 (m, 1H), 3.86 (s, 3H), 3.71 (s, 3H), 3.18 – 2.75 (m, 2H), 1.42 (s, 9H).

**<sup>13</sup>C NMR (100 MHz, CDCl<sub>3</sub>)** δ 172.16, 154.98, 151.60 (d, *J* = 244.9 Hz), 147.43 (d, *J* = 10.6 Hz), 132.29 (d, *J* = 3.9 Hz), 121.47 (d, *J* = 6.8 Hz), 115.90 (d, *J* = 18.4 Hz), 114.37 (d, *J* = 1.9 Hz), 80.02, 56.15, 54.37, 52.26, 38.03, 28.28.

**<sup>19</sup>F NMR (376 MHz, CDCl<sub>3</sub>)** δ -137.52 – -137.94(m).

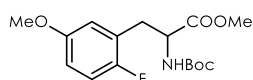

58-F

**methyl 2-((tert-butoxycarbonyl)amino)-3-(2-fluoro-5-methoxyphenyl)propanoate(58-F).**

Follow the general procedure **B**, the title compound was obtained as a white solid from 2-fluoro-5-methoxybenzaldehyde. Spectral data matched literature data<sup>28</sup>.

**<sup>1</sup>H NMR (400 MHz, CDCl<sub>3</sub>)** δ 6.94 (t, *J* = 9.1 Hz, 1H), 6.73 (dt, *J* = 8.9, 3.6 Hz, 1H), 6.65 (dd, *J* = 5.9, 3.1 Hz, 1H), 5.13 – 4.71 (m, 1H), 4.68 – 4.30 (m, 1H), 3.76 (s, 3H), 3.73 (s, 3H), 3.29 – 2.84 (m, 2H), 1.40 (s, 9H).

**<sup>13</sup>C NMR (100 MHz, CDCl<sub>3</sub>)** δ 172.13, 155.76 (d, *J* = 237.8 Hz), 155.50 (d, *J* = 1.6 Hz), 154.99, 123.77 (d, *J* = 17.8 Hz), 116.39 (d, *J* = 4.1 Hz), 115.74 (d, *J* = 24.3 Hz), 113.66 (d, *J* = 8.1 Hz), 79.90, 55.68, 53.59, 52.34, 32.06, 28.25.

**<sup>19</sup>F NMR (376 MHz, CDCl<sub>3</sub>)** δ -137.52 – -137.94(m).

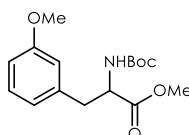

58-Cl-i

**methyl 2-((tert-butoxycarbonyl)amino)-3-(3-methoxyphenyl)propanoate(58-Cl-i).**

The title compound was prepared according to reported procedure. Spectral data matched literature data<sup>28</sup>

**<sup>1</sup>H NMR (400 MHz, CDCl<sub>3</sub>)** δ 7.20 (t, *J* = 7.9 Hz, 1H), 6.78 (dd, *J* = 8.2, 2.4 Hz, 1H), 6.71 (d, *J* = 7.5

Hz, 1H), 6.66 (s, 1H), 5.14 – 4.63 (m,  $J = 57.5$  Hz, 1H), 4.63 – 4.27 (m, 1H), 3.78 (s, 3H), 3.72 (s, 3H), 3.16 – 2.76 (m, 2H).

**$^{13}\text{C}$  NMR (100 MHz,  $\text{CDCl}_3$ )**  $\delta$  172.28, 159.64, 155.05, 137.47, 129.50, 121.57, 114.93, 112.44, 79.90, 55.11, 54.31, 52.19, 38.29, 28.27.

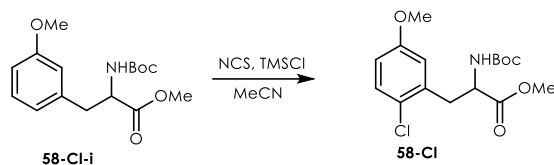

**methyl 2-((tert-butoxycarbonyl)amino)-3-(2-chloro-5-methoxyphenyl)propanoate (58-Cl).**

Follow the reported chlorination method<sup>17</sup>, the title compound was obtained as a white solid (234 mg, 68%) from compound **58-Cl-i** (309 mg, 1 mmol) and purified by flash LC using ethyl acetate/ hexane (1/20 to 1/10).

**$^1\text{H}$  NMR (400 MHz,  $\text{CDCl}_3$ )**  $\delta$  7.24 (d,  $J = 9.3$  Hz, 1H), 6.76 – 6.68 (m, 2H), 5.13 – 4.78 (m, 1H), 4.67 – 4.43 (m, 1H), 3.76 (s, 3H), 3.72 (s, 3H), 3.25 (dd,  $J = 13.8, 5.8$  Hz, 1H), 3.12 – 2.80 (m, 1H), 1.38 (s, 9H).

**$^{13}\text{C}$  NMR (100 MHz,  $\text{CDCl}_3$ )**  $\delta$  172.28, 158.17, 154.92, 135.08, 130.10, 125.81, 116.56, 114.06, 79.86, 55.43, 53.42, 52.35, 36.25, 28.21.

**HRMS (ESI):** Calculated for  $\text{C}_{16}\text{H}_{23}\text{ClNO}_5$  ( $\text{M}+\text{H}$ )<sup>+</sup>: 344.1259; found: 344.1255.

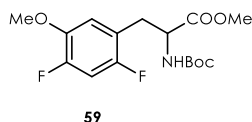

**methyl 2-((tert-butoxycarbonyl)amino)-3-(2,4-difluoro-5-methoxyphenyl)propanoate (59).**

Follow the general procedure **B**, the title compound was obtained as a white solid from 2,4-difluoro-5-methoxybenzaldehyde.

**$^1\text{H}$  NMR (400 MHz,  $\text{CDCl}_3$ )**  $\delta$  6.90 – 6.76 (m, 1H), 6.77 – 6.64 (m, 1H), 5.15 – 4.68 (m, 1H), 4.63 – 4.29 (m, 1H), 3.84 (s, 3H), 3.73 (s, 3H), 3.20 – 2.75 (m, 2H), 1.41 (s, 9H).

**$^{13}\text{C}$  NMR (100 MHz,  $\text{CDCl}_3$ )**  $\delta$  171.99, 154.92, 154.47 (dd,  $J = 240.9, 10.3$  Hz), 151.20 (dd,  $J = 248.6, 12.5$  Hz), 143.95 (dd,  $J = 10.8, 3.0$  Hz), 118.31 (dd,  $J = 17.3, 4.2$  Hz), 115.68 (dd,  $J = 5.4, 2.8$  Hz), 104.58 (dd,  $J = 28.2, 22.4$  Hz), 80.01, 56.83, 53.54, 52.42, 31.63, 28.25.

**$^{19}\text{F}$  NMR (376 MHz,  $\text{CDCl}_3$ )**  $\delta$  -124.12 – -124.28 (m), -131.8 – -132.64 (m)

**HRMS (ESI):** Calculated for  $\text{C}_{11}\text{H}_{14}\text{F}_2\text{NO}_3$  ( $\text{M}+\text{H}$ )<sup>+</sup>: 246.0936; found: 246.0934.

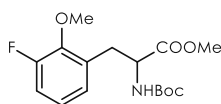

60

**methyl 2-((tert-butoxycarbonyl)amino)-3-(3-fluoro-2-methoxyphenyl)propanoate (60).** Follow the general procedure **B**, the title compound was obtained as a white solid from 3-fluoro-2-methoxybenzaldehyde.

**<sup>1</sup>H NMR (400 MHz, CDCl<sub>3</sub>)** δ 7.04 – 6.82 (m, 3H), 5.29 – 4.85 (m, 1H), 4.60 – 4.23 (m, 1H), 3.94 (d, *J* = 2.0 Hz, 3H), 3.71 (s, 3H), 3.19 – 2.83 (m, 2H), 1.38 (s, 9H).

**<sup>13</sup>C NMR (100 MHz, CDCl<sub>3</sub>)** δ 172.49, 155.22 (d, *J* = 246.7 Hz), 155.15, 145.97 (d, *J* = 10.4 Hz), 130.70, 126.10 (d, *J* = 3.1 Hz), 123.25 (d, *J* = 8.0 Hz), 115.97 (d, *J* = 19.4 Hz), 79.76, 61.15 (d, *J* = 6.9 Hz), 54.15, 52.21, 32.71, 28.24.

**<sup>19</sup>F NMR (376 MHz, CDCl<sub>3</sub>)** δ -129.90 – -130.40(m)

**HRMS (ESI):** Calculated for C<sub>11</sub>H<sub>15</sub>FNO<sub>3</sub> (M+H)<sup>+</sup>: 228.1030; found: 228.1026.

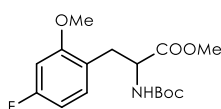

61

**methyl 2-((tert-butoxycarbonyl)amino)-3-(4-fluoro-2-methoxyphenyl)propanoate (61).** Follow the general procedure **B**, the title compound was obtained as a white solid from 4-fluoro-2-methoxybenzaldehyde. Spectral data matched literature data<sup>16</sup>.

**<sup>1</sup>H NMR (400 MHz, CDCl<sub>3</sub>)** δ 7.10 – 6.93 (m, 1H), 6.71 – 6.35 (m, 2H), 5.14 – 4.78 (m, 1H), 4.67 – 4.18 (m, 1H), 3.81 (s, 3H), 3.69 (s, 3H), 3.15 – 2.83 (m, 2H), 1.38 (s, 9H).

**<sup>13</sup>C NMR (100 MHz, CDCl<sub>3</sub>)** δ 172.73, 162.87 (d, *J* = 244.9 Hz), 158.64 (d, *J* = 9.8 Hz), 155.11, 131.63 (d, *J* = 9.9 Hz), 120.28 (d, *J* = 3.3 Hz), 106.73 (d, *J* = 21.1 Hz), 98.87 (d, *J* = 25.8 Hz), 79.63, 55.57, 53.73, 52.05, 32.46, 28.24.

**<sup>19</sup>F NMR (376 MHz, CDCl<sub>3</sub>)** δ -112.06 – -112.81 (m).

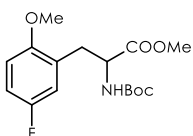

62

**methyl 2-((tert-butoxycarbonyl)amino)-3-(5-fluoro-2-methoxyphenyl)propanoate (62).** Follow the general procedure **B**, the title compound was obtained as a white solid from 5-fluoro-2-methoxybenzaldehyde. Spectral data matched literature data<sup>21</sup>.

**<sup>1</sup>H NMR (400 MHz, CDCl<sub>3</sub>)** δ 6.90 (td, *J* = 8.7, 2.4 Hz, 1H), 6.82 (dd, *J* = 8.8, 2.4 Hz, 1H), 6.77 (dd, *J*



= 8.7, 4.3 Hz, 1H), 5.30 – 4.90 (m, 1H), 4.63 – 4.22 (m, 1H), 3.80 (s, 3H), 3.71 (s, 3H), 3.15 – 2.83 (m, 2H), 1.38 (s, 9H).

**<sup>13</sup>C NMR (100 MHz, CDCl<sub>3</sub>)** δ 172.53, 156.50 (d, *J* = 281.7 Hz), 155.52, 153.75 (d, *J* = 1.8 Hz), 126.36 (d, *J* = 7.3 Hz), 117.83 (d, *J* = 23.3 Hz), 114.07 (d, *J* = 22.7 Hz), 111.08 (d, *J* = 8.3 Hz), 79.68, 55.84, 53.64, 52.11, 32.88, 28.22.

**<sup>19</sup>F NMR (376 MHz, CDCl<sub>3</sub>)** δ -123.69 – -124.43 (m).

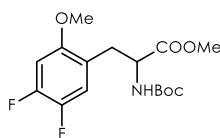

63

**methyl 2-((tert-butoxycarbonyl)amino)-3-(4,5-difluoro-2-methoxyphenyl)propanoate (63).**

Follow the general procedure **B**, the title compound was obtained as a white solid from 4,5-difluoro-2-methoxybenzaldehyde.

**<sup>1</sup>H NMR (400 MHz, CDCl<sub>3</sub>)** δ 6.84 (dd, *J* = 11.3, 6.9 Hz, 1H), 6.66 (dd, *J* = 10.8, 7.1 Hz, 1H), 5.19 – 4.69 (m, 1H), 4.60 – 4.27 (m, 1H), 3.84 (s, 3H), 3.72 (d, *J* = 11.3 Hz, 3H), 3.11 (dd, *J* = 14.0, 5.4 Hz, 1H), 2.95 (dd, *J* = 13.9, 6.2 Hz, 1H), 1.40 (s, 9H).

**<sup>13</sup>C NMR (100 MHz, CDCl<sub>3</sub>)** δ 171.98, 157.01 (dd, *J* = 241.7, 2.5 Hz), 154.92, 148.25 (dd, *J* = 241.8, 2.9 Hz), 147.48 – 147.19 (m), 117.79 (dd, *J* = 20.3, 6.2 Hz), 114.37 (dd, *J* = 18.7, 6.2 Hz), 101.39 (d, *J* = 28.2 Hz), 79.98, 56.37, 53.51, 52.38, 31.21, 28.20.

**<sup>19</sup>F NMR (376 MHz, CDCl<sub>3</sub>)** δ -120.26 – -120.60 (m), -140.17 – -141.11 (m).

**HRMS (ESI):** Calculated for C<sub>11</sub>H<sub>14</sub>F<sub>2</sub>NO<sub>3</sub> (M+H)<sup>+</sup>: 246.0936; found: 246.0931.

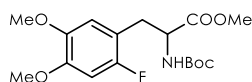

64-F

**methyl 2-((tert-butoxycarbonyl)amino)-3-(2-fluoro-4,5-dimethoxyphenyl)propanoate (64-F).**

Follow the general procedure **B**, the title compound was obtained as a white solid (341 mg) from 2-fluoro-4,5-dimethoxybenzaldehyde.

**<sup>1</sup>H NMR (400 MHz, CDCl<sub>3</sub>)** δ 6.68 – 6.52 (m, 2H), 5.16 – 4.68 (m, 1H), 4.61 – 4.25 (m, 1H), 3.84 (s, 3H), 3.83 (s, 3H), 3.73 (s, 3H), 3.18 – 2.78 (m, 2H), 1.41 (s, 9H).

**<sup>13</sup>C NMR (100 MHz, CDCl<sub>3</sub>)** δ 172.23, 155.40 (d, *J* = 238.2 Hz), 154.97, 148.86 (d, *J* = 10.8 Hz), 145.06, 113.44 (d, *J* = 6.1 Hz), 113.27 (d, *J* = 17.5 Hz), 99.92 (d, *J* = 28.3 Hz), 79.87, 56.36, 56.07, 53.72, 52.33, 31.44, 28.27.

**<sup>19</sup>F NMR (376 MHz, CDCl<sub>3</sub>)** δ -125.04 (dd, *J* = 10.7, 7.2 Hz).

**HRMS (ESI):** Calculated for C<sub>12</sub>H<sub>17</sub>FNO<sub>4</sub> (M+H)<sup>+</sup>: 258.1136; found: 258.1131.

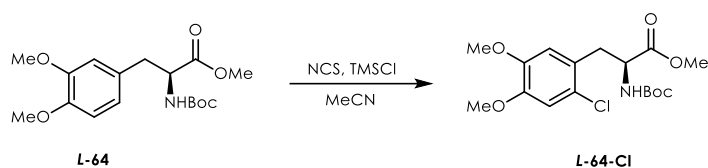

**methyl (S)-2-((tert-butoxycarbonyl)amino)-3-(2-chloro-4,5-dimethoxyphenyl)propanoate (L-64-Cl).** Follow the reported chlorination method<sup>17</sup>, the title compound was prepared as a white solid (190 mg, 42%) from compound **L-64** (407 mg, 1.2 mmol) and purified by silica gel chromatography using ethyl acetate/ hexane (1/3) as eluent.

**<sup>1</sup>H NMR (400 MHz, CDCl<sub>3</sub>)** δ 6.85 (s, 1H), 6.67 (s, 1H), 5.20 – 4.70 (m, 1H), 4.72 – 4.35 (m, *J* = 6.6 Hz, 1H), 3.85 (s, 6H), 3.73 (s, 3H), 3.20 (dd, *J* = 14.0, 6.1 Hz, 1H), 3.13 – 2.81 (m, *J* = 14.0, 7.6 Hz, 1H), 1.39 (s, 9H).

**<sup>13</sup>C NMR (100 MHz, CDCl<sub>3</sub>)** δ 172.37, 154.92, 148.50, 147.70, 125.79, 125.49, 113.54, 112.46, 79.89, 56.08, 53.58, 52.37, 35.66, 28.26.

**HRMS (ESI):** Calculated for C<sub>10</sub>H<sub>12</sub>F<sub>2</sub>NO<sub>3</sub> (M+H)<sup>+</sup>: 274.0841; found: 274.0831

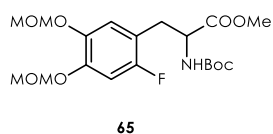

**methyl 2-((tert-butoxycarbonyl)amino)-3-(2-fluoro-4,5-bis(methoxymethoxy)phenyl)propanoate (65).** Follow the general procedure **B**, the title compound was obtained as a white solid from 2-fluoro-4,5-bis(methoxymethoxy)benzaldehyde which obtained from literature procedure<sup>29</sup>.

**<sup>1</sup>H NMR (400 MHz, CDCl<sub>3</sub>)** δ 7.00 – 6.73 (m, 2H), 5.19 (s, 2H), 5.14 (q, *J* = 6.7 Hz, 2H), 5.10 – 4.64 (m, 1H), 4.64 – 4.25 (m, 1H), 3.74 (s, 3H), 3.53 – 3.47 (m, 6H), 3.18 – 2.62 (m, 2H), 1.41 (s, 9H).

**<sup>13</sup>C NMR (100 MHz, CDCl<sub>3</sub>)** δ 172.10, 156.32 (d, *J* = 240.5 Hz), 154.97, 147.19 (d, *J* = 10.3 Hz), 143.14, 119.41 (d, *J* = 5.8 Hz), 115.63 (d, *J* = 17.5 Hz), 104.37 (d, *J* = 28.1 Hz), 96.06, 95.38, 79.83, 56.18 (d, *J* = 9.3 Hz), 53.63, 52.28, 31.30, 28.24.

**<sup>19</sup>F NMR (376 MHz, CDCl<sub>3</sub>)** δ -122.51 – -122.91 (m).

**HRMS (ESI):** Calculated for C<sub>19</sub>H<sub>29</sub>FNO<sub>8</sub> (M+H)<sup>+</sup>: 418.1872; found: 418.1869.

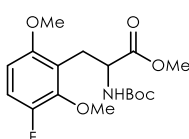

**methyl 2-((tert-butoxycarbonyl)amino)-3-(3-fluoro-2,6-dimethoxyphenyl)propanoate(66-F).**

Follow the general procedure **B**, the title compound was obtained as a white solid from 3-fluoro-2,6-dimethoxybenzaldehyde(**49-F-i**).

**<sup>1</sup>H NMR (400 MHz, CDCl<sub>3</sub>)** δ 6.93 (dd, *J* = 11.3, 9.2 Hz, 1H), 6.49 (dd, *J* = 9.1, 3.6 Hz, 1H), 5.38 – 5.04(m, 1H), 4.54 – 4.17 (m, 1H), 3.94 (d, *J* = 2.2 Hz, 3H), 3.80 (s, 3H), 3.73 (s, 3H), 3.02 – 3.21 (m, 1H), 2.97 (dd, *J* = 13.1, 9.6 Hz, 1H), 1.35 (s, 9H).

**<sup>13</sup>C NMR (100 MHz, CDCl<sub>3</sub>)** δ 173.08, 155.39, 154.09, 149.93 (d, *J* = 238.1Hz), 146.42 (d, *J* = 11.2Hz), 118.97, 114.81 (d, *J* = 20.5Hz), 110.00, 104.70 (d, *J* = 7.6 Hz), 79.46, 77.20, 61.15 (d, *J* = 7.2 Hz, 4H), 55.90, 53.59, 52.14, 28.24, 26.31.

**<sup>19</sup>F NMR (376 MHz, CDCl<sub>3</sub>)** δ -139.00 – -139.40 (m).

**HRMS (ESI):** Calculated for C<sub>12</sub>H<sub>17</sub>FNO<sub>4</sub> (M+H)<sup>+</sup>: 258.1136; found: 258.1131.

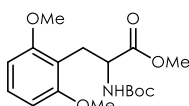

**66-F-i**

**methyl 2-((tert-butoxycarbonyl)amino)-3-(2,6-dimethoxyphenyl)propanoate(66-CI-i).**

Follow the general procedure **B**, the title compound was prepared as a white solid from 2,6-dimethoxybenzaldehyde.

**<sup>1</sup>H NMR (400 MHz, CDCl<sub>3</sub>)** δ 7.16 (t, *J* = 8.3 Hz, 1H), 6.53 (d, *J* = 8.4 Hz, 2H), 5.45 – 5.14 (m, 1H), 4.46 – 4.15 (m, 1H), 3.80 (s, 6H), 3.71 (s, 3H), 3.20 – 2.92 (m, 2H), 1.34 (s, 9H).

**<sup>13</sup>C NMR (100 MHz, CDCl<sub>3</sub>)** δ 173.33, 158.39, 155.43, 128.10, 112.86, 103.49, 79.12, 55.56, 53.72, 51.89, 28.18, 25.17.

**HRMS (ESI):** Calculated for C<sub>12</sub>H<sub>18</sub>NO<sub>4</sub> (M+H)<sup>+</sup>: 240.1230; found: 240.1226.

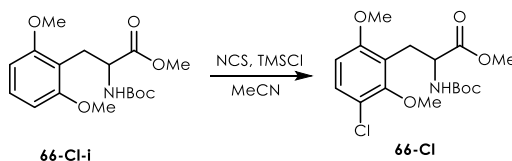

**66-CI-i**

**66-Cl**

**methyl 2-((tert-butoxycarbonyl)amino)-3-(3-chloro-2,6-dimethoxyphenyl)propanoate(66-Cl).**

Follow the reported chlorination method<sup>17</sup>, the title compound was obtained as a white solid (284 mg, 76%) from compound **66-CI-i** (339 mg, 1 mmol) and purified by flash LC using ethyl acetate/ hexane (1/20 to 1/10).

**<sup>1</sup>H NMR (400 MHz, CDCl<sub>3</sub>)** δ 7.19 (d, *J* = 8.9 Hz, 1H), 6.58 (d, *J* = 8.9 Hz, 1H), 5.38 – 5.00 (m, 1H), 4.55 – 4.15 (m, 1H), 3.83 (s, 3H), 3.80 (s, 3H), 3.71 (s, 3H), 3.23 – 3.00 (m, 1H), 2.95 (dd, *J* = 13.2, 9.5 Hz, 1H), 1.32 (s, 9H).

**<sup>13</sup>C NMR (100 MHz, CDCl<sub>3</sub>)** δ 172.90, 157.27, 155.28, 155.10, 128.83, 120.24, 119.32, 107.01, 79.42,

60.83, 55.81, 53.47, 52.08, 28.14, 26.72.

**HRMS (ESI):** Calculated for C<sub>12</sub>H<sub>17</sub>ClNO<sub>4</sub> (M+H)<sup>+</sup>: 274.0841; found: 274.0836.

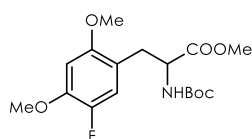

67-F

**methyl 2-((tert-butoxycarbonyl)amino)-3-(5-fluoro-2,4-dimethoxyphenyl)propanoate (67-F).**

Follow the general procedure **B**, the title compound was obtained as a white solid from 5-fluoro-2,4-dimethoxybenzaldehyde (**50-F-i**).

**<sup>1</sup>H NMR (400 MHz, CDCl<sub>3</sub>)** δ 6.81 (d, *J* = 11.5 Hz, 1H), 6.50 (d, *J* = 7.2 Hz, 1H), 5.31 – 4.87 (m, 1H), 4.56 – 4.18 (m, 1H), 3.89 (s, 3H), 3.81 (s, 3H), 3.71 (s, 3H), 3.10 – 2.78 (m, 2H), 1.39 (s, 9H).

**<sup>13</sup>C NMR (100 MHz, CDCl<sub>3</sub>)** δ 172.62, 155.14, 153.81, 146.79 (d, *J* = 10.8 Hz), 146.48 (d, *J* = 238.2 Hz), 118.25 (d, *J* = 18.7 Hz), 116.58 (d, *J* = 5.8 Hz), 98.20, 79.69, 56.71, 56.03, 53.80, 52.11, 32.16, 28.25.

**<sup>19</sup>F NMR (376 MHz, CDCl<sub>3</sub>)** δ -145.09 – -145.73 (m).

**HRMS (EI):** Calculated for C<sub>12</sub>H<sub>15</sub>FNO<sub>4</sub> [M]<sup>+</sup>: 256.0985; found: 256.0981.

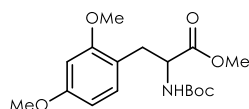

67-Cl-i

**methyl 2-((tert-butoxycarbonyl)amino)-3-(2,4-dimethoxyphenyl)propanoate (67-Cl-i).**

Follow the general procedure **B**, the title compound was prepared as a white solid from 2,4-dimethoxybenzaldehyde.

**<sup>1</sup>H NMR (400 MHz, CDCl<sub>3</sub>)** δ 6.98 (d, *J* = 8.0 Hz, 1H), 6.54 – 6.27 (m, 2H), 5.26 – 4.88 (m, 1H), 4.62 – 4.17 (m, 1H), 3.80 (s, 3H), 3.78 (s, 3H), 3.69 (s, 3H), 3.13 – 2.74 (m, 2H), 1.39 (s, 9H).

**<sup>13</sup>C NMR (100 MHz, CDCl<sub>3</sub>)** δ 172.92, 160.07, 158.49, 155.24, 131.43, 116.93, 104.20, 98.49, 79.49, 55.32, 55.30, 54.18, 51.98, 32.16, 28.28.

**HRMS (ESI):** Calculated for C<sub>12</sub>H<sub>18</sub>NO<sub>4</sub><sup>+</sup> (M+H)<sup>+</sup>: 240.1230; found: 240.1225.

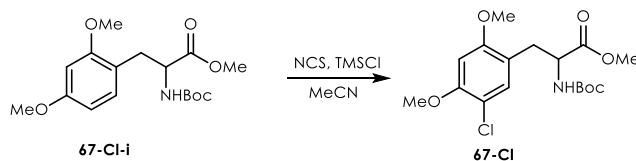

**methyl 2-((tert-butoxycarbonyl)amino)-3-(5-chloro-2,4-dimethoxyphenyl)propanoate (67-Cl).**

Follow the reported chlorination method<sup>17</sup>, the title compound was prepared as a white solid

(280 mg, 75%) from compound **67-Cl-i** (339 mg, 1 mmol) and purified by flash LC using ethyl acetate/ hexane (5% to 10%)

**<sup>1</sup>H NMR (400 MHz, CDCl<sub>3</sub>)** δ 7.04 (s, 1H), 6.46 (s, 1H), 5.15 – 4.92 (m, 1H), 4.53 – 4.16 (m, 1H), 3.89 (s, 3H), 3.83 (s, 3H), 3.70 (s, 3H), 3.03 (dd, *J* = 13.7, 5.4 Hz, 1H), 2.89 (dd, *J* = 13.6, 7.5 Hz, 1H), 1.38 (s, 9H).

**<sup>13</sup>C NMR (100 MHz, CDCl<sub>3</sub>)** δ 172.60, 157.15, 155.08, 154.78, 131.89, 117.60, 113.24, 96.48, 79.67, 56.28, 55.75, 53.67, 52.08, 32.15, 28.23.

**HRMS (ESI):** Calculated for C<sub>12</sub>H<sub>17</sub>ClNO<sub>4</sub> (M+H)<sup>+</sup>: 274.0841; found: 274.0836.

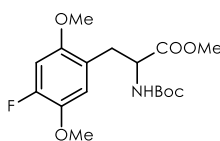

**68**

**methyl 2-((tert-butoxycarbonyl)amino)-3-(4-fluoro-2,5-dimethoxyphenyl)propanoate (68).**

Follow the general procedure, the title compound was obtained as a white solid from 4-fluoro-2,5-dimethoxybenzaldehyde (**68-i**).

**<sup>1</sup>H NMR (400 MHz, CDCl<sub>3</sub>)** δ 6.74 (d, *J* = 9.4 Hz, 1H), 6.66 (d, *J* = 12.8 Hz, 1H), 3.15 – 2.74 (m, 1H), 4.54 – 4.16 (m, 1H), 3.83 (d, *J* = 0.7 Hz, 3H), 3.77 (s, 3H), 3.71 (s, 3H), 3.15 – 2.74 (m, 2H), 1.39 (s, 10H).

**<sup>13</sup>C NMR (100 MHz, CDCl<sub>3</sub>)** δ 172.64, 155.14, 151.82 (d, *J* = 244.7 Hz), 151.71 (d, *J* = 8.1 Hz), 140.92 (d, *J* = 11.0 Hz), 119.84 (d, *J* = 3.8 Hz), 117.17 (d, *J* = 3.1 Hz), 100.49 (d, *J* = 22.4 Hz), 79.69, 57.25, 56.03, 53.93, 52.12, 32.46, 28.27.

**<sup>19</sup>F NMR (376 MHz, CDCl<sub>3</sub>)** δ -133.20 – -133.76 (m).

**HRMS (ESI):** Calculated for C<sub>12</sub>H<sub>17</sub>FNO<sub>4</sub> (M+H)<sup>+</sup>: 258.1136; found: 258.1130.

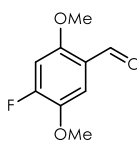

**68-i**

**4-fluoro-2,5-dimethoxybenzaldehyde (68-i).** The title compound was prepared from reported procedure<sup>27</sup>.

**<sup>1</sup>H NMR (400 MHz, CDCl<sub>3</sub>)** δ 10.36 (s, 1H), 7.44 (d, *J* = 9.7 Hz, 1H), 6.78 (d, *J* = 12.4 Hz, 1H), 3.882 (s, 3H), 3.879 (s, 3H).

**<sup>13</sup>C NMR (100 MHz, CDCl<sub>3</sub>)** δ 188.05 (d, *J* = 1.3 Hz), 157.36 (d, *J* = 9.1 Hz), 157.27 (d, *J* = 256.6 Hz), 142.17 (d, *J* = 11.4 Hz), 120.65 (d, *J* = 3.3 Hz), 112.00 (d, *J* = 4.7 Hz), 101.33 (d, *J* = 22.6 Hz) 56.59,

56.32.

$^{19}\text{F}$  NMR (376 MHz,  $\text{CDCl}_3$ )  $\delta$  -120.04 (dd,  $J = 12.4, 9.7$  Hz)

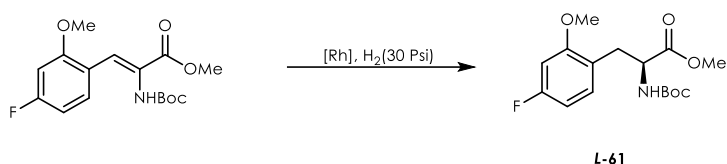

**methyl (S)-2-((tert-butoxycarbonyl)amino)-3-(4-fluoro-2-methoxyphenyl)propanoate (L-61).**

To a solution of methyl (Z)-2-((tert-butoxycarbonyl)amino)-3-(4-fluoro-2-methoxyphenyl)acrylate (150 mg, 0.46 mmol) in MeOH was added 1,2-Bis((2S,5S)-2,5-diethylphospholano)benzene(cyclooctadiene)rhodium(I) tetrafluoroborate (10 mg, 0.015mmol, 0.033 equiv. ). The solution was purged and backfilled with  $\text{H}_2$  and then stirred under  $\text{H}_2$  atmosphere (30 psi) for 16 h at room temperature. The reaction solution was then concentrated in vacuo and purified by silica gel chromatography using ethyl acetate/hexane (1/10) to afford the title compound as a white solid (150 mg, 99% yield). Spectral data matched racemic compound **61**. The enantiomeric excess was determined to be 98% by HPLC equipped with a chiral column.

HPLC conditions: Column: Phenomenex, Lux® 5  $\mu\text{m}$  Cellulose-1, 250 x 4.6 mm LC Column. Solvent A: Hexane; Solvent B: isopropanol. Isocratic elution at 10 % solvent B. Flow rate: 1 ml/min.

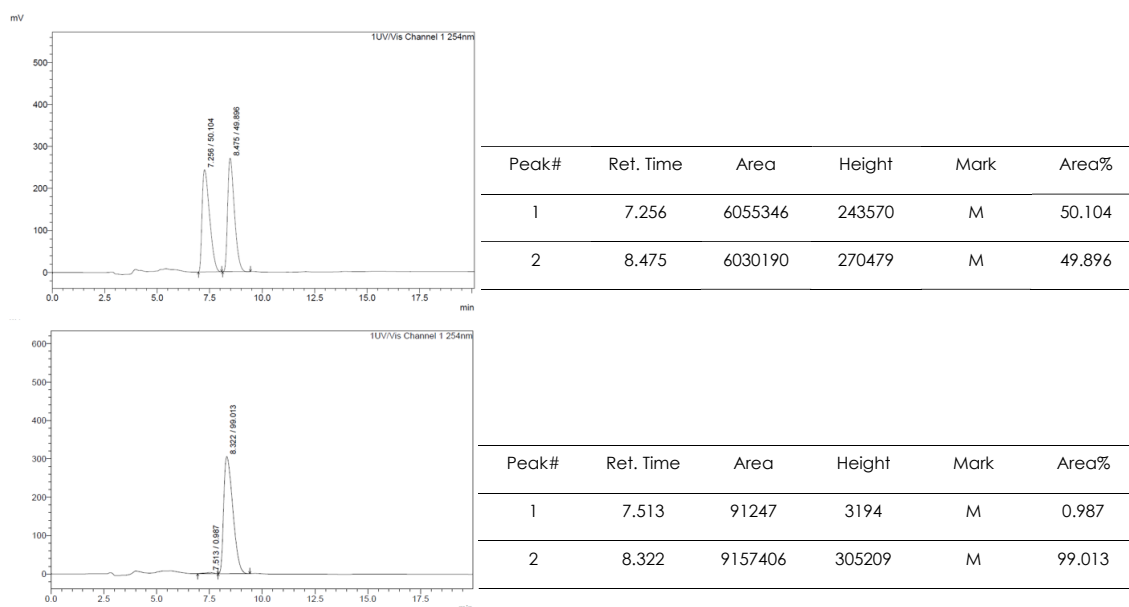

**Supplementary Figure 1.** Determination of enantiomeric excess of **L-61**

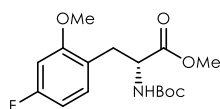

**D-61**

**methyl (R)-2-((tert-butoxycarbonyl)amino)-3-(4-fluoro-2-methoxyphenyl)propanoate (D-61).**

Follow the same preparation procedure of compound **L-61**, the title compound was obtained as a white solid (136 mg, 90% yield) with catalyst 1,2-Bis((2R,5R)-2,5-diethylphospholano)benzene(cyclooctadiene)rhodium(I) tetrafluoroborate (10 mg, 3.3% mmol). Spectral data matched racemic compound **61**. The enantiomeric excess was determined to be 97% under the same HPLC conditions with **L-61**.

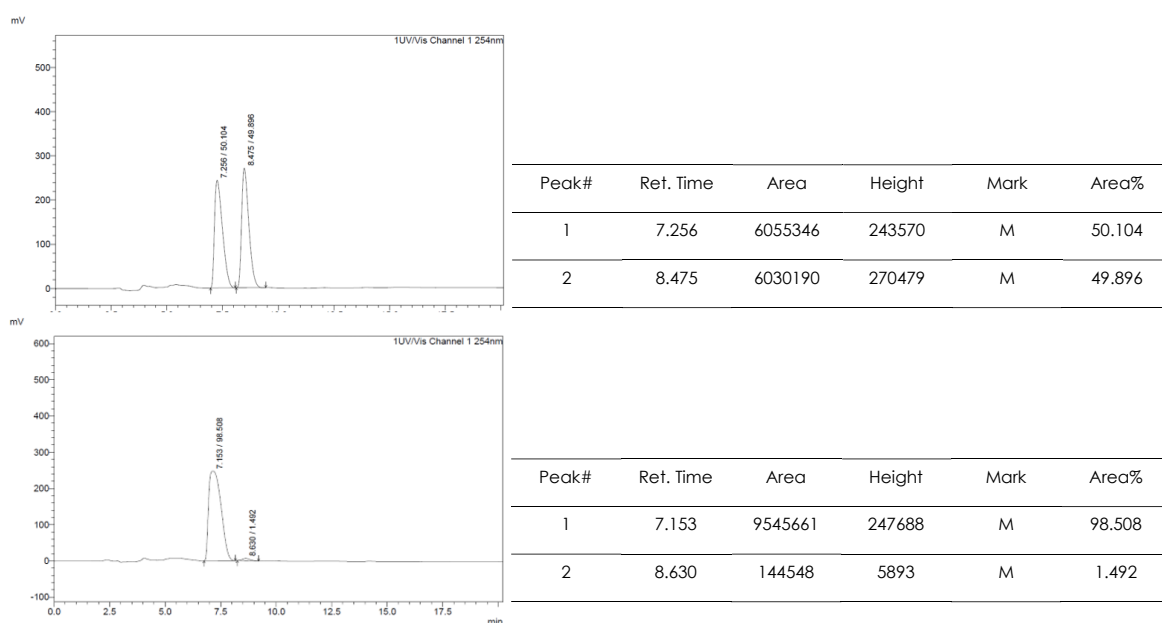

**Supplementary Figure 2.** Determination of enantiomeric excess of **D-61**

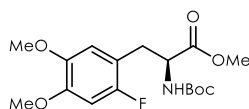

**L-64-F**

**methyl (S)-2-((tert-butoxycarbonyl)amino)-3-(2-fluoro-4,5-dimethoxyphenyl)propanoate (L-64-F).**

Follow the preparation procedure of compound **L-61**, the title compound was obtained as a white solid (168 mg, 93%) from the asymmetric reduction of methyl (Z)-2-((tert-butoxycarbonyl)amino)-3-(2-fluoro-4,5-dimethoxyphenyl)acrylate (180 mg, 0.51 mmol) with the same rhodium catalyst (11 mg, 3.3% mmol). The enantiomeric excess was determined to be 99% under the same HPLC conditions with **L-61**. Spectral data matched racemic compound **64**.

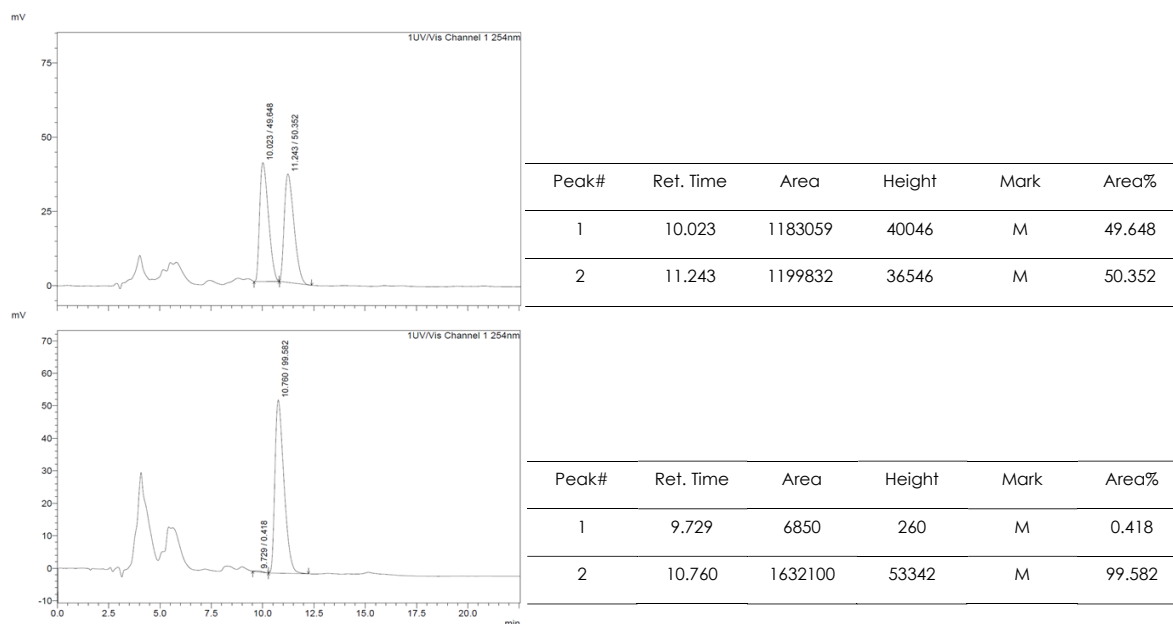

**Supplementary Figure 3.** Determination of enantiomeric excess of **L-64-F**

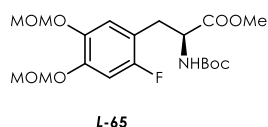

**methyl (S)-2-((tert-butoxycarbonyl)amino)-3-(2-fluoro-4,5-bis(methoxymethoxy)phenyl)propanoate (L-65).** Follow the same preparation procedure of compound **L-61**, the title compound was obtained as a colorless oil (478 mg, 95%) from the asymmetric reduction of methyl (Z)-2-((tert-butoxycarbonyl)amino)-3-(2-fluoro-4,5-bis(methoxymethoxy)phenyl)acrylate (500 mg, 1.2 mmol) with the same rhodium catalyst (26 mg, 3.3% mmol). Spectral data matched racemic compound **65**. The enantiomeric excess was determined to be > 99%.

HPLC conditions: Column: Phenomenex, Lux® 5 µm Cellulose-2, 250 x 4.6 mm LC Column. Solvent A: Hexane; Solvent B: isopropanol. Isocratic elution at 10 % solvent B. Flow rate: 1 ml/min.



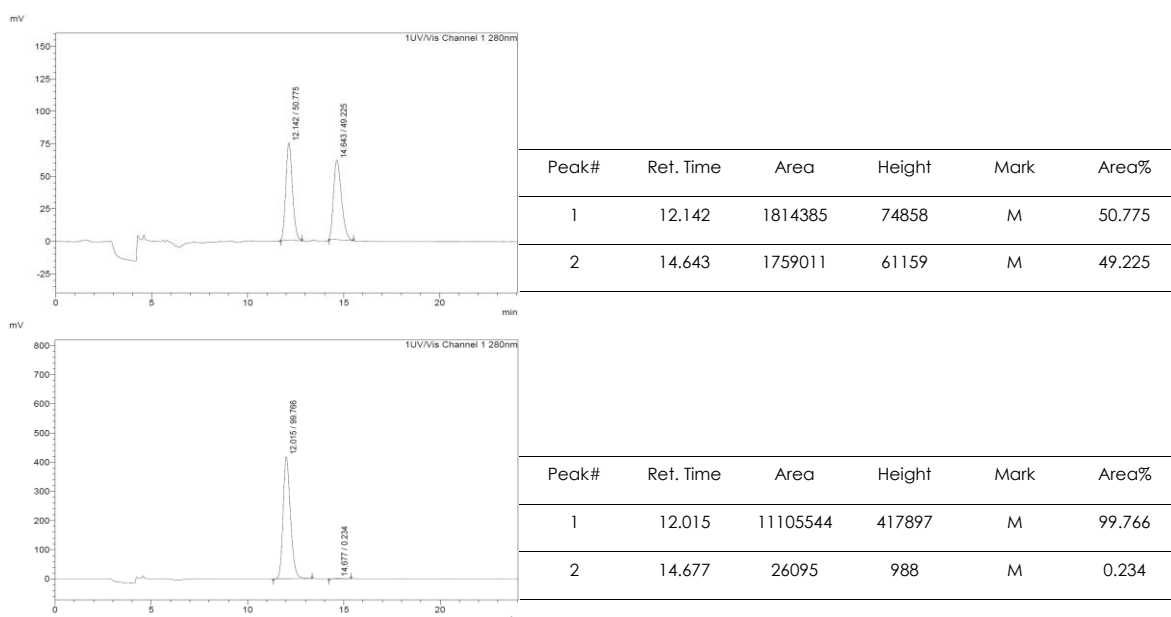

**Supplementary Figure 4.** Determination of enantiomeric excess of **L-65**

### General procedure for deprotection of tyrosine derivatives (general procedure C)

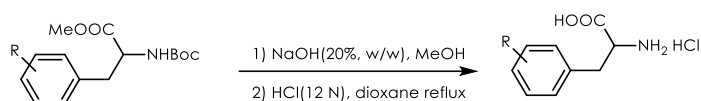

To a solution of tyrosine derivatives (**54-63**) in methanol (10 ml) was added NaOH solution (20%, 2 ml). The solution was stirred for 4 h and then concentrated to remove the methanol. Water and Et<sub>2</sub>O was added to the resulted solution. The aqueous phase was collected and neutralize with HCl (aq. 1N). The solution was extracted with ethyl acetate (3 x15 ml). The organic phase was combined and washed with brine, dried over Na<sub>2</sub>SO<sub>4</sub>, filtered, and concentrated under reduced pressure to give the hydrolysis product which was dissolved in dioxane (10 ml). After adding HCl (12 N, 2 mL), the solution was refluxed for 2h and then concentrated. The crude product was triturated with Et<sub>2</sub>O and filtered to give the amino acid hydrochloride salt.

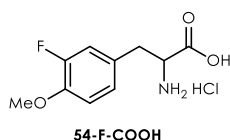

**2-amino-3-(3-fluoro-4-methoxyphenyl)propanoic acid hydrochloride(54-F-COOH).** Follow the general procedure **C**, the title compound was obtained as a white solid (218 mg, 88%) from **54** (327 mg, 1mmol).

**<sup>1</sup>H NMR (400 MHz, D<sub>2</sub>O)** δ 7.24 – 6.90 (m, 3H), 4.26 (dt, *J* = 34.2, 17.2 Hz, 1H), 3.85 (s, 3H), 3.24 (dd, *J* = 14.7, 5.6 Hz, 1H), 3.13 (dd, *J* = 14.7, 7.5 Hz, 1H).

**<sup>13</sup>C NMR (100 MHz, D<sub>2</sub>O)** δ 171.22, 151.72 (d, *J* = 243.4 Hz), 146.26 (d, *J* = 10.6 Hz), 126.92 (d, *J* = 6.5 Hz), 125.61 (d, *J* = 3.5 Hz), 116.60 (d, *J* = 18.6 Hz), 114.13 (d, *J* = 2.0 Hz), 56.03, 53.91, 34.54.

**<sup>19</sup>F NMR (376 MHz, D<sub>2</sub>O)** δ -103.59 – -161.95 (m).

**HRMS (ESI):** Calculated for C<sub>10</sub>H<sub>13</sub>FNO<sub>3</sub> (M+H)<sup>+</sup>: 214.0874; found: 214.0866.

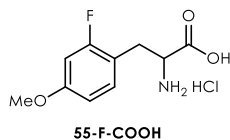

**2-amino-3-(2-fluoro-4-methoxyphenyl)propanoic acid hydrochloride(55-F-COOH).** Follow the general procedure **C**, the title compound was obtained as a light-brown solid (64 mg, 85%) from compound **55** (98 mg, 0.3 mmol).

**<sup>1</sup>H NMR (400 MHz, D<sub>2</sub>O)** δ 7.32 – 7.18 (m, 1H), 6.87 – 6.74 (m, 2H), 4.28 (dd, *J* = 7.3, 5.9 Hz, 1H), 3.86 – 3.76 (m, 3H), 3.34 (dd, *J* = 14.8, 5.5 Hz, 1H), 3.19 (dd, *J* = 14.8, 7.3 Hz, 1H).

**<sup>13</sup>C NMR (100 MHz, D<sub>2</sub>O)** δ 171.43, 161.67 (d, *J* = 244.0 Hz), 160.08 (d, *J* = 10.0 Hz), 132.14 (d, *J* = 6.1 Hz), 112.91 (d, *J* = 16.3 Hz), 110.54 (d, *J* = 2.9 Hz), 101.82 (d, *J* = 25.9 Hz), 55.61, 53.41, 28.87.

**<sup>19</sup>F NMR (376 MHz, D<sub>2</sub>O)** δ -115.50 – -115.67 (m).

**HRMS (ESI):** Calculated for C<sub>10</sub>H<sub>13</sub>FNO<sub>3</sub> (M+H)<sup>+</sup>: 214.0874; found: 214.0868.

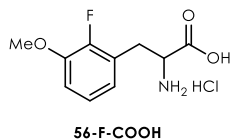

**2-amino-3-(2-fluoro-3-methoxyphenyl)propanoic acid hydrochloride(56-F-COOH).** Follow the general procedure **C**, the title compound was obtained as a light-brown solid (60 mg, 80%) from compound **56** (98 mg, 0.3 mmol).

**<sup>1</sup>H NMR (400 MHz, D<sub>2</sub>O)** δ 7.20 – 7.10 (m, 2H), 6.92 (td, *J* = 6.9, 2.3 Hz, 1H), 4.30 (dd, *J* = 7.4, 6.0 Hz, 1H), 3.91 (s, 3H), 3.40 (dd, *J* = 15.1, 5.4 Hz, 1H), 3.32 – 3.16 (m, 1H).

**<sup>13</sup>C NMR (100 MHz, D<sub>2</sub>O)** δ 171.39, 150.68 (d, *J* = 242.6 Hz), 146.94 (d, *J* = 10.8 Hz), 124.79 (d, *J* = 4.6 Hz), 122.87 (d, *J* = 3.1 Hz, 16H), 121.80 (d, *J* = 13.1 Hz, 7H), 113.61 (d, *J* = 1.6 Hz, 16H), 56.13 (s, 14H), 53.31 (s, 18H), 29.25 (d, *J* = 3.1 Hz, 17H).

**<sup>19</sup>F NMR (376 MHz, D<sub>2</sub>O)** δ -140.99 (t, *J* = 6.9 Hz).

**HRMS (ESI):** Calculated for C<sub>10</sub>H<sub>13</sub>FNO<sub>3</sub> (M+H)<sup>+</sup>: 214.0874; found: 214.0867.

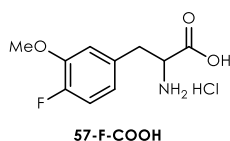

**2-amino-3-(4-fluoro-3-methoxyphenyl)propanoic acid hydrochloride(57-F-COOH).** Follow the

general procedure **C**, the title compound was obtained as a white solid (223 mg, 90%) from compound **57** (327 mg, 1 mmol)

**<sup>1</sup>H NMR (400 MHz, D<sub>2</sub>O)** δ 7.14 (dd, *J* = 11.6, 8.3 Hz, 1H), 7.03 (dd, *J* = 8.2, 1.9 Hz, 1H), 6.94 – 6.80 (m, 1H), 4.31 (dd, *J* = 7.6, 5.7 Hz, 1H), 3.87 (s, 3H), 3.30 (dd, *J* = 14.6, 5.6 Hz, 1H), 3.18 (dd, *J* = 14.7, 7.6 Hz, 1H).

**<sup>13</sup>C NMR (100 MHz, D<sub>2</sub>O)** δ 171.39, 151.47 (d, *J* = 242.8 Hz), 146.92 (d, *J* = 10.9 Hz), 130.56 (d, *J* = 3.8 Hz), 122.09 (d, *J* = 7.3 Hz), 116.19 (d, *J* = 18.4 Hz), 114.58, 56.04, 54.07, 35.18.

**<sup>19</sup>F NMR (376 MHz, D<sub>2</sub>O)** δ -137.79 – -137.93 (m).

**HRMS (ESI):** Calculated for C<sub>10</sub>H<sub>13</sub>FNO<sub>3</sub> (M+H)<sup>+</sup>: 214.0874; found: 214.0868.

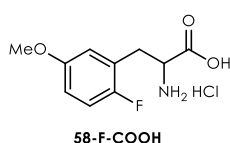

**2-amino-3-(2-fluoro-5-methoxyphenyl)propanoic acid hydrochloride(58-F-COOH).** Follow the general procedure **C**, the title compound was obtained as a white solid (70 mg, 90%) from compound **58-F** (100 mg, 0.31 mmol).

**<sup>1</sup>H NMR (400 MHz, D<sub>2</sub>O)** δ 7.13 (t, *J* = 9.3 Hz, 1H), 6.95 (dt, *J* = 9.0, 3.7 Hz, 1H), 6.90 (dd, *J* = 6.0, 3.1 Hz, 1H), 4.32 (t, *J* = 6.6 Hz, 1H), 3.80 (s, 3H), 3.37 (dd, *J* = 14.8, 5.8 Hz, 1H), 3.21 (dd, *J* = 14.7, 7.5 Hz, 1H).

**<sup>13</sup>C NMR (100 MHz, D<sub>2</sub>O)** δ 171.28, 155.73 (d, *J* = 236.7 Hz), 155.08 (d, *J* = 1.9 Hz), 121.72 (d, *J* = 17.9 Hz), 116.50 (d, *J* = 4.1 Hz), 116.32 (d, *J* = 23.9 Hz), 114.98 (d, *J* = 8.4 Hz), 55.81, 53.27, 29.61.

**<sup>19</sup>F NMR (376 MHz, D<sub>2</sub>O)** δ -127.93 – -128.46 (m).

**HRMS (ESI):** Calculated for C<sub>10</sub>H<sub>13</sub>FNO<sub>3</sub> (M+H)<sup>+</sup>: 214.0874; found: 214.0867.

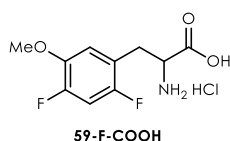

**2-amino-3-(2,4-difluoro-5-methoxyphenyl)propanoic acid hydrochloride(59-F-COOH).** Follow the general procedure **C**, the title compound was obtained as a light-brown solid (69 mg, 89%) from compound **59** (100 mg, 0.29 mmol).

**<sup>1</sup>H NMR (400 MHz, D<sub>2</sub>O)** δ 7.13 – 6.99 (m, *J* = 9.6, 2.1 Hz, 2H), 4.30 (dd, *J* = 7.2, 6.0 Hz, 1H), 3.87 (s, 3H), 3.36 (dd, *J* = 14.9, 5.8 Hz, 1H), 3.22 (dd, *J* = 15.0, 7.4 Hz, 1H).

**<sup>13</sup>C NMR (100 MHz, D<sub>2</sub>O)** δ 171.26, 154.50 (dd, *J* = 239.7, 10.9 Hz), 151.26 (dd, *J* = 246.7, 12.4 Hz), 143.56 (dd, *J* = 10.7, 3.0 Hz), 116.51 (dd, *J* = 17.2, 4.1 Hz), 115.87 (dd, *J* = 5.2, 2.7 Hz), 104.72 (dd, *J* = 28.0, 22.6 Hz), 56.68, 53.32, 29.11.

**<sup>19</sup>F NMR (376 MHz, D<sub>2</sub>O)** δ -123.67 – -124.01 (m), -132.28 (ddd, *J* = 11.4, 9.6, 3.5 Hz).

**HRMS (ESI):** Calculated for C<sub>10</sub>H<sub>12</sub>F<sub>2</sub>NO<sub>3</sub> (M+H)<sup>+</sup>: 232.0780; found: 232.0774.

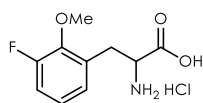

**60-F-COOH**

**2-amino-3-(3-fluoro-2-methoxyphenyl)propanoic acid hydrochloride (60-F-COOH).** Follow the general procedure **C**, the title compound was obtained as a white solid (62 mg, 83%) from compound **60** (98 mg, 0.3 mmol).

**<sup>1</sup>H NMR (400 MHz, D<sub>2</sub>O)** δ 7.25 – 7.02 (m, 3H), 4.37 – 4.26 (m, 1H), 3.42 (dd, *J* = 14.4, 6.0 Hz, 1H), 3.24 (dd, *J* = 14.4, 7.4 Hz, 1H).

**<sup>13</sup>C NMR (100 MHz, D<sub>2</sub>O)** δ 171.36, 155.12 (d, *J* = 245.9 Hz), 145.35 (d, *J* = 9.9 Hz), 128.44 (d, *J* = 2.2 Hz), 126.47 (d, *J* = 3.1 Hz), 124.52 (d, *J* = 8.2 Hz), 116.91 (d, *J* = 19.1 Hz), 61.29 (d, *J* = 6.2 Hz), 53.49, 30.48 (d, *J* = 2.5 Hz).

**<sup>19</sup>F NMR (376 MHz, D<sub>2</sub>O)** δ -130.45 – -130.64 (m).

**HRMS (ESI):** Calculated for C<sub>10</sub>H<sub>13</sub>FNO<sub>3</sub> (M+H)<sup>+</sup>: 214.0874; found: 214.0867.

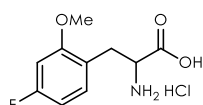

**61-F-COOH**

**2-amino-3-(4-fluoro-2-methoxyphenyl)propanoic acid hydrochloride (61-F-COOH).** Follow the general procedure **C**, the title compound was obtained as a white solid (65 mg, 87%) from compound **61** (98 mg, 0.3 mmol).

**<sup>1</sup>H NMR (400 MHz, D<sub>2</sub>O)** δ 7.22 (t, *J* = 7.5 Hz, 1H), 6.86 (dd, *J* = 11.2, 2.3 Hz, 1H), 6.73 (td, *J* = 8.5, 2.4 Hz, 1H), 4.37 – 4.25 (m, 1H), 3.85 (s, 3H), 3.34 (dd, *J* = 14.5, 5.5 Hz, 1H), 3.15 (dd, *J* = 14.5, 7.2 Hz, 1H).

**<sup>13</sup>C NMR (100 MHz, D<sub>2</sub>O)** δ 171.67, 163.27 (d, *J* = 243.7 Hz), 158.69 (d, *J* = 10.4 Hz), 132.09 (d, *J* = 10.3 Hz), 117.77 (d, *J* = 3.1 Hz), 107.03 (d, *J* = 21.4 Hz), 99.47 (d, *J* = 26.3 Hz), 55.41, 53.28, 30.25.

**<sup>19</sup>F NMR (376 MHz, D<sub>2</sub>O)** δ -111.69 – -111.88 (m).

**HRMS (ESI):** Calculated for C<sub>10</sub>H<sub>13</sub>FNO<sub>3</sub> (M+H)<sup>+</sup>: 214.0874; found: 214.0867.

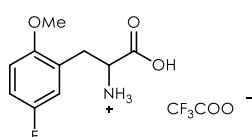

**62-F-COOH**

**2-amino-3-(5-fluoro-2-methoxyphenyl)propanoic acid trifluoroacetic acid(62-F-COOH).** The title compound was obtained from our reported procedure<sup>21</sup>.

**<sup>1</sup>H NMR (400 MHz, D<sub>2</sub>O)** δ 7.10 (td, *J* = 8.6, 3.0 Hz, 1H), 7.05 – 6.96 (m, 2H), 4.30 (dd, *J* = 6.9, 5.9 Hz, 1H), 3.84 (s, 3H), 3.36 (dd, *J* = 14.4, 5.5 Hz, 1H), 3.15 (dd, *J* = 14.4, 7.3 Hz, 1H).

**<sup>13</sup>C NMR (100 MHz, D<sub>2</sub>O)** δ 171.65, 162.87 (q, *J* = 35.5 Hz), 156.51 (d, *J* = 236.5 Hz), 153.69 (d, *J* = 2.1 Hz), 123.64 (d, *J* = 7.7 Hz), 117.75 (d, *J* = 23.7 Hz), 116.24 (q, *J* = 291.7 Hz), 115.25 (d, *J* = 22.8 Hz), 112.20 (d, *J* = 8.5 Hz), 55.62, 53.31, 30.71.

**<sup>19</sup>F NMR (376 MHz, D<sub>2</sub>O)** δ -75.65, -124.19 (td, *J* = 8.7, 4.6 Hz).

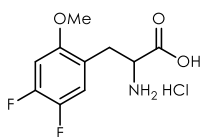

**63-F-COOH**

**2-amino-3-(4,5-difluoro-2-methoxyphenyl)propanoic acid hydrochloride(63-F-COOH).** Follow the general procedure **C**, the title compound was obtained as a white solid (68 mg, 88%) from compound **62** (100 mg, 0.29 mmol).

**<sup>1</sup>H NMR (400 MHz, D<sub>2</sub>O)** δ 7.12 (dd, *J* = 11.6, 7.0 Hz, 1H), 7.00 (dd, *J* = 11.3, 7.2 Hz, 1H), 4.28 (dd, *J* = 7.2, 5.9 Hz, 1H), 3.89 (s, 3H), 3.32 (dd, *J* = 14.9, 5.7 Hz, 1H), 3.17 (dd, *J* = 14.9, 7.2 Hz, 1H).

**<sup>13</sup>C NMR (100 MHz, D<sub>2</sub>O)** δ 171.27, 157.16 (dd, *J* = 240.5, 2.4 Hz), 148.09 (dd, *J* = 239.3, 2.2 Hz), 147.44 (t, *J* = 12.1 Hz), 117.46 (dd, *J* = 20.8, 6.1 Hz), 112.35 (dd, *J* = 18.6, 6.7 Hz), 102.01 (d, *J* = 29.9 Hz), 56.35, 53.26, 28.67.

**<sup>19</sup>F NMR (376 MHz, D<sub>2</sub>O)** δ -119.85 – -120.25 (m), -141.09 (ddd, *J* = 15.3, 11.6, 7.3 Hz).

**HRMS (ESI):** Calculated for C<sub>10</sub>H<sub>12</sub>F<sub>2</sub>NO<sub>3</sub> (M+H)<sup>+</sup>: 232.0780; found: 232.0774.

### 3. Radiolabeling experiments

#### 3.1 Reagents and equipment information

All chemicals are analytical grade and used without further purification. Ultrapure water was obtained from a Millipore MilliQ Gradient A10 system. Pre-conditioned Sep-PAK® light QMA cartridge were purchased from ABX Corporation and were flushed with 10 ml of water before use. Photocatalyst **S1** was obtained from our previous reported procedure<sup>21</sup>. Tetrabutylammonium bicarbonate (TBAHCO<sub>3</sub>) solution (20%, w/w) was prepared by bubbling CO<sub>2</sub> to the tetrabutylammonium hydroxide solution (20%, w/w) diluted from the tetrabutylammonium hydroxide solution (54~56%, w/w) which was purchased from sigma-Aldrich. The pH of the TBAHCO<sub>3</sub> solution was in the range of 9.0 to 10.0. TBAHCO<sub>3</sub> MeCN solution (~60 mg/ml) was prepared as follows: 300 μl of TBAB solution (20%, w/w) was transferred into a 5 ml V-vial. The water was removed by lyophilization. The TBAHCO<sub>3</sub> concentrate was

azeotropically dried with anhydrous MeCN (1 ml) under a stream of argon gas at 100°C and then dissolved in 1ml anhydrous MeCN and stored under N<sub>2</sub> for use.

The 450 nm blue diode laser (MDL-D-450, 450nm, the power rating was set to 3.5W after fiber coupling) used for the labeling reaction was purchased from Changchun New Industries Optoelectronics Tech. Co., Ltd. The blue LED lamp (A160WE TUNA BLUE, 40W) was purchased from Kessil. The irradiation wavelengths observed are centered around 456 nm, 390 nm and 427 nm, with the major irradiation peak centered around 456 nm. (Supplementary Figure 5).

<sup>18</sup>F activity was counted using a CRC-25 PET detector from Capintec. High-performance liquid chromatography (HPLC) was accomplished on a SHIMADZU chromatography system (Model CBM-20A) and analyzed using LabSolutions software. The λ absorbance detector and the model 2200 scaler ratemeter radiation detector was added to the HPLC system.

[<sup>18</sup>F]FDOPA scale up synthesis was isolated on a PeakSimple chromatography system using peakSimple software(version 4.44) with a semi-preparation HPLC column.

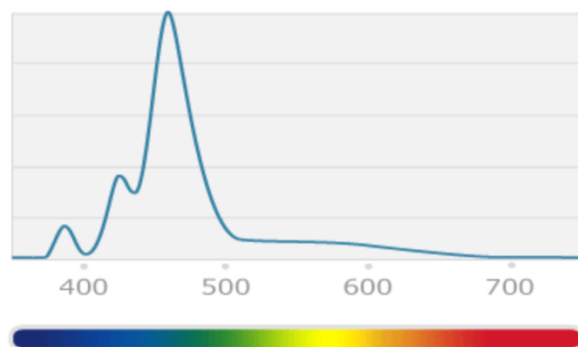

**Supplementary Figure 5.** Irradiation profile for A160WE TUNA BLUE lamp.

### 3.2 General procedure for the preparation of [<sup>18</sup>F]TBAF

Anhydrous [<sup>18</sup>F]TBAF was obtained from our reported procedure<sup>15</sup>. [<sup>18</sup>F]Fluoride was produced via the <sup>18</sup>O(p,n)<sup>18</sup>F reaction by proton irradiation (40 μA, 45 min) of [<sup>18</sup>O]H<sub>2</sub>O. The aqueous solution of [<sup>18</sup>F]fluoride was delivered into a hot cell and passed through a QMA cartridge (water preconditioning) to trap the [<sup>18</sup>F]fluoride. The [<sup>18</sup>F]fluoride was eluted into a 5 ml V-vial which sealed with a Teflon-lined septum screw cap with 600 μL solution of 70 μL tetrabutylammonium bicarbonate (TBAHCO<sub>3</sub>) solution (20%, w/w), 53 μL H<sub>2</sub>O and 477 μL MeCN. This solution was azeotropically dried with MeCN (1 ml x 3) under stream of Argon at 100°C and then put under vacuum for 3 min. The resulting residue was diluted with ~1 ml anhydrous MeCN to obtain the [<sup>18</sup>F]TBAF solution (typically 1.6 -1.8 Ci) which was used for the labeling reaction.

### 3.3 General HPLC conditions

#### General HPLC conditions for crude reaction analysis (Radiochemical conversion calculation)

Column: Phenomenex, Kinetex® 5 μm EVO C18 100 Å, 250 x 4.6 mm LC Column. Solvent A:

0.1%TFA water; Solvent B: 0.1%TFA acetonitrile.

Grad/isocrat: 0 to 2 min: isocratic elution at 5% solvent B, 2 to 22 min: 5% to 95% solvent B, 22 to 28.1 min: isocratic elution at 95% solvent B, 28.1 to 30 min: 95% to 5% solvent B, 30 to 35 min: isocratic elution at 5% solvent B. Flow rate: 1 ml/min.

### General HPLC conditions for purification and co-injection

Column: Phenomenex, Kinetex® 5 µm F5 100 Å, 250 x 4.6 mm LC Column. Solvent A: 0.1%TFA water; Solvent B: 0.1%TFA acetonitrile; Isocratic elution at **x %** solvent B. Flow rate: 1 ml/min.

**x % = 35%** for **36-<sup>18</sup>F**, **38-<sup>18</sup>F**; **x %= 40%** for **1-<sup>18</sup>F**, **14-<sup>18</sup>F**, **31-<sup>18</sup>F**, **32-<sup>18</sup>F**, **37-<sup>18</sup>F**; **x %= 45%** for **5-<sup>18</sup>F**, **12-<sup>18</sup>F**, **41-<sup>18</sup>F-α**; **x %= 50%** for **3-<sup>18</sup>F**, **6-<sup>18</sup>F**, **8-<sup>18</sup>F**, **11-<sup>18</sup>F**, **13-<sup>18</sup>F**, **26-<sup>18</sup>F**, **35-<sup>18</sup>F**, **43-<sup>18</sup>F**, **47-<sup>18</sup>F**, **L-64-<sup>18</sup>F**; **x %= 55%** for **2-<sup>18</sup>F**, **4-<sup>18</sup>F**, **7-<sup>18</sup>F**, **15-<sup>18</sup>F**, **16-<sup>18</sup>F**, **19-<sup>18</sup>F**, **27-<sup>18</sup>F**, **33-<sup>18</sup>F**, **40-<sup>18</sup>F**, **41-<sup>18</sup>F**, **48-<sup>18</sup>F**, **54-<sup>18</sup>F**, **55-<sup>18</sup>F**, **56-<sup>18</sup>F**, **57-<sup>18</sup>F**, **58-<sup>18</sup>F**, **59-<sup>18</sup>F**, **60-<sup>18</sup>F**, **61-<sup>18</sup>F**, **62-<sup>18</sup>F**, **63-<sup>18</sup>F**, **L-65-<sup>18</sup>F**, **66-<sup>18</sup>F**, **67-<sup>18</sup>F**, **68-<sup>18</sup>F**; **x %= 60%** for **9-<sup>18</sup>F**, **20-<sup>18</sup>F**, **21-<sup>18</sup>F**, **24-<sup>18</sup>F**, **25-<sup>18</sup>F**, **29-<sup>18</sup>F**, **42-<sup>18</sup>F**, **45-<sup>18</sup>F**, **46-<sup>18</sup>F**, **49-<sup>18</sup>F**, **50-<sup>18</sup>F**; **x %= 65%** for **52-<sup>18</sup>F**; **x %= 70%** for **23-<sup>18</sup>F**, **34-<sup>18</sup>F**, **44-<sup>18</sup>F**; **x % = 75%** for **28-<sup>18</sup>F**.

Compound **10-<sup>18</sup>F** was purified and characterized by isocratic elution at 30% solvent B using the crude analysis conditions; compound **30-<sup>18</sup>F** was purified and characterized using the same condition as the crude analysis HPLC conditions.

All the radiochemical reactions were subjected to radio-HPLC using this general HPLC condition unless otherwise noted.

### 3.4 General procedure for photoredox-mediated halide/<sup>18</sup>F interconversion

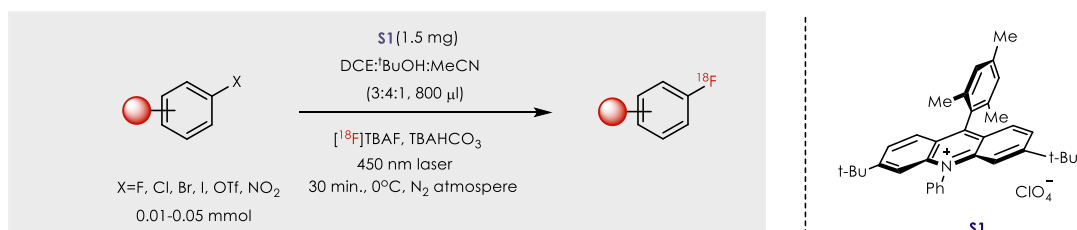

Follow the modified reported procedure<sup>15</sup>, the substrate (0.01 - 0.05 mmol) and photocatalyst (**S1**, 1.5 mg) were weighed into a 1.5 ml eppendorf tube and transferred (with solvent when the substrate is liquid or oil) into a 5 ml V-vial via pipette. DCE (300 µl), anhydrous MeCN (45-65 µl), <sup>t</sup>BuOH(400 µl) and 25 µl of TBAB in MeCN solution (~60 mg/ml) were sequentially added to the V-vial. Then a 10 - 30 µl aliquot of [<sup>18</sup>F]TBAF in MeCN (typically 10-30 mCi) was added to the reaction vial via pipette. The reaction V-vial was then either fixed on an iron support and cooled using an ice bath or on a block without cooling. A needle connected to an N<sub>2</sub> filled balloon was inserted to the bottom of the V-vial and the reaction medium was continuously sparged throughout the entire reaction time. The reaction was then irradiated top-down with a laser (MDL-D-450, 450 nm, 3.5 W after fibre coupling) (Supplementary Figure 6) or a A160WE Tuna Blue Kessil LED lamp (Supplementary Figure 7) for 30 min. The resulting solution was diluted

and evenly mixed with MeCN (0.5 -1ml). An aliquot of the reaction mixture (typically 300-1000  $\mu\text{Ci}$ ) was taken for radio-HPLC analysis. The activity injected into HPLC was measured (this activity was denoted by  $\alpha$ ) and the time was recorded. The fraction corresponding to radiolabeled product was collected and the activity was measured (this activity was denoted by  $\beta$ ) and the time was recorded. The decay-corrected  $\beta$  could be calculated from the recorded isolation time of each substrate. The radiochemical conversion (RCC) was obtained by dividing the decay-corrected  $\beta$  by  $\alpha$ . Co-injection of the purified  $^{18}\text{F}$ -labeled compound with commercial or synthesized  $^{19}\text{F}$  standard via HPLC was used to confirm the identity of the radiolabeled compound.

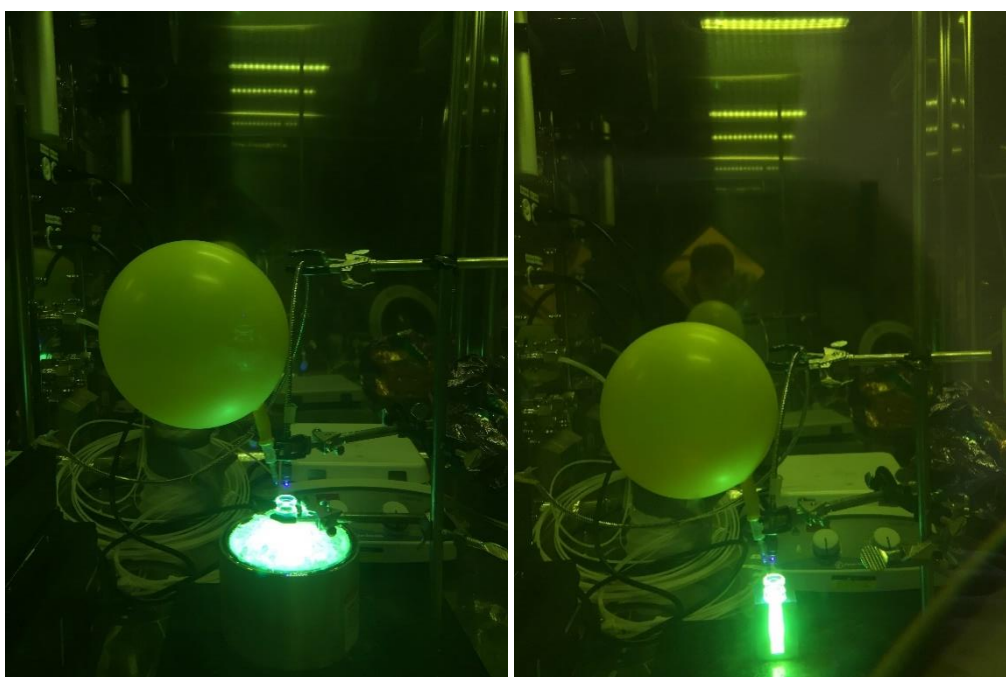

**Supplementary Figure 6.** Reaction set-up with laser under ice cooling(left) and room temperature(right)



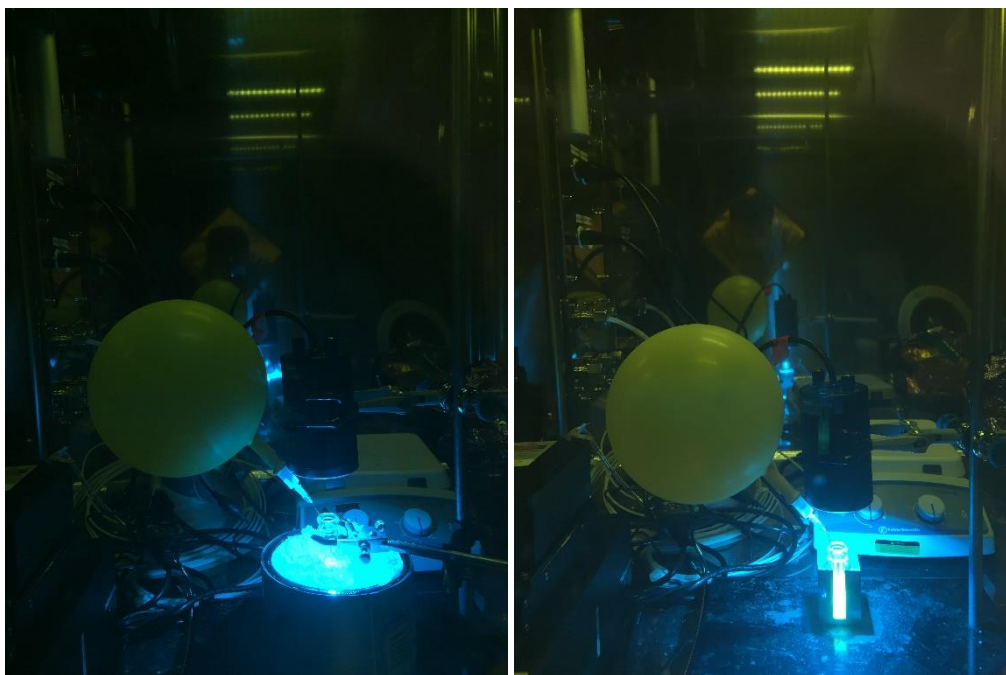

**Supplementary Figure 7.** Reaction set-up with LED under ice cooling(left) and room temperature(right)

### 3.5. Radio-HPLC analysis and characterization for $^{18}\text{F}$ -radiolabeled arenes

All  $^{18}\text{F}$ -labelling reactions were performed according to general procedure at section 3.4 unless otherwise noted. Each labeling reaction, starting activity ( $[^{18}\text{F}]\text{TBAF}$ ), injected and collected activities, isolation time, decay corrected activity and calculated radiochemical conversion (RCC) are summarized in a table for each substrate. All  $^{18}\text{F}$ -labeled products were analyzed and characterized according to the general HPLC conditions listed in Section 3.3. Crude radio-HPLC traces of each reaction (labeled with reaction number), HPLC traces of purification and co-injection were listed. The collected  $^{18}\text{F}$ -labeled product from crude HPLC analysis may require further HPLC-purification before co-injection with its corresponding  $^{19}\text{F}$  standard. The red HPLC traces in the following spectra were obtained with a UV signal at 212 nm unless otherwise noted. The black HPLC traces represent the radio signal.

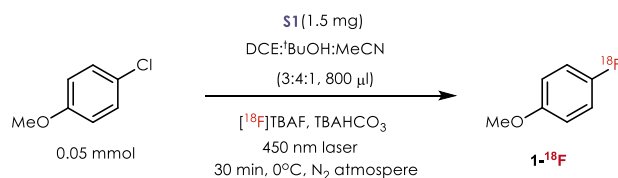

| Reaction | Substrate | Activity ( $[^{18}\text{F}]\text{TBAF}$ ) | Injected dose | Collected dose | Isolation time | Decay corrected dose | Radiochemical conversion (RCC) |
|----------|-----------|-------------------------------------------|---------------|----------------|----------------|----------------------|--------------------------------|
|----------|-----------|-------------------------------------------|---------------|----------------|----------------|----------------------|--------------------------------|

|                                                                     |             |           |              |             |        |               |                   |
|---------------------------------------------------------------------|-------------|-----------|--------------|-------------|--------|---------------|-------------------|
| <b>1</b>                                                            |             | 11.04 mCi | 600 $\mu$ Ci | 9 $\mu$ Ci  | 18 min | 10.1 $\mu$ Ci | 1.7% <sup>a</sup> |
| <b>2</b>                                                            | <b>1-Cl</b> | 7.84 mCi  | 279 $\mu$ Ci | 33 $\mu$ Ci | 17 min | 36.7 $\mu$ Ci | 13.2%             |
| <b>3</b>                                                            |             | 7.51 mCi  | 585 $\mu$ Ci | 68 $\mu$ Ci | 17 min | 75.7 $\mu$ Ci | 12.9%             |
| <b>4</b>                                                            |             | 7.52 mCi  | 755 $\mu$ Ci | 84 $\mu$ Ci | 17 min | 93.5 $\mu$ Ci | 12.4%             |
| Average RCC: <b>12.8<math>\pm</math>0.3%</b> (n=3, N <sub>2</sub> ) |             |           |              |             |        |               |                   |

<sup>a</sup>Reaction was conducted in the air.

**Supplementary Table 1.** HPLC-isolated RCCs of **1-<sup>18</sup>F**

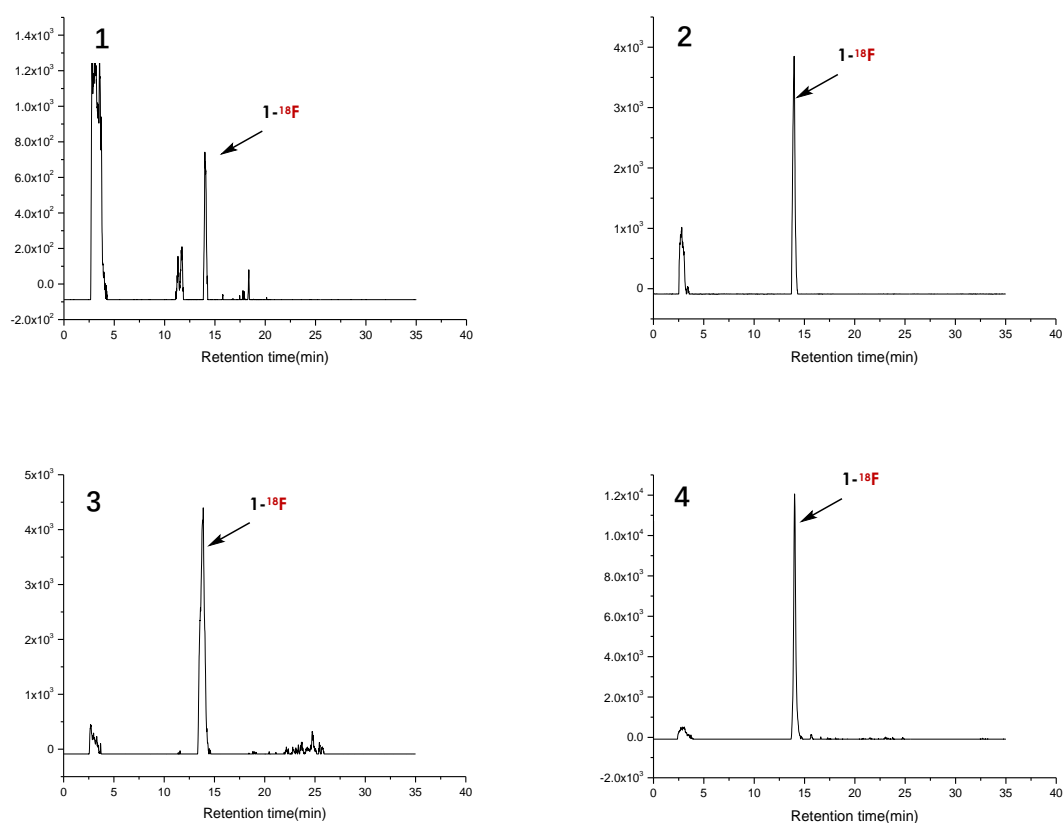

**Supplementary Figure 8.** Crude radio-HPLC traces from **1-Cl** to **1-<sup>18</sup>F**

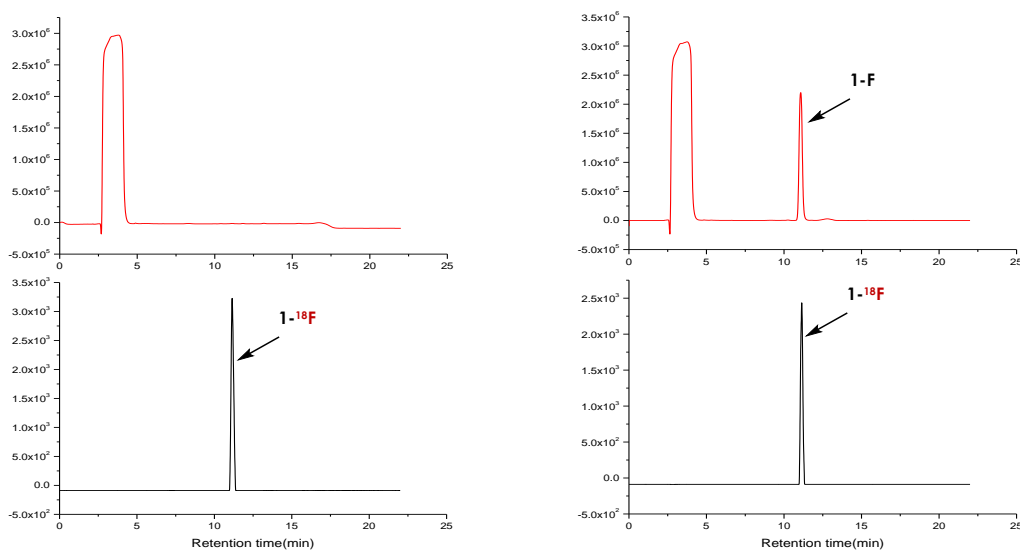

**Supplementary Figure 9.** Purification(left) and co-injection(right) of **1-<sup>18</sup>F**

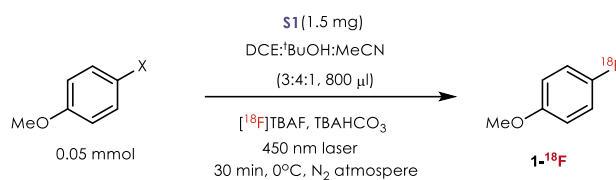

| Reaction                                                                         | Substrate                                    | Activity ([ <sup>18</sup> F]TBAF) | Injected dose | Collected dose | Isolation time | Decay corrected dose | Radiochemical conversion (RCC) |
|----------------------------------------------------------------------------------|----------------------------------------------|-----------------------------------|---------------|----------------|----------------|----------------------|--------------------------------|
| 1                                                                                |                                              | 9.64 mCi                          | 442 μCi       | 54 μCi         | 16 min         | 59.7 μCi             | 13.5%                          |
| 2                                                                                | <b>1-Br</b> (X=Br)                           | 8.58 mCi                          | 341 μCi       | 30 μCi         | 16 min         | 33.2 μCi             | 9.7%                           |
| 3                                                                                |                                              | 7.5 mCi                           | 324 μCi       | 32 μCi         | 16 min         | 35.4 μCi             | 10.9%                          |
| Average RCC of <b>1-<sup>18</sup>F</b> from <b>1-Br</b> : <b>11.4±1.6%</b> (n=3) |                                              |                                   |               |                |                |                      |                                |
| 4                                                                                | <b>1-I</b> (X=I)                             | 12.42 mCi                         | 668 μCi       | 9 μCi          | 16 min         | 10 μCi               | <b>1.5%</b>                    |
| 5                                                                                |                                              | 11.53 mCi                         | 540 μCi       | 386 μCi        | 20 min         | 432.5 μCi            | 80.1%                          |
| 6                                                                                | <b>1-F</b> (X=F)                             | 7.14 mCi                          | 432 μCi       | 304 μCi        | 17 min         | 338.4 μCi            | 78.3%                          |
| 7                                                                                |                                              | 6.93 mCi                          | 426 μCi       | 309 μCi        | 17 min         | 344.0 μCi            | 80.8%                          |
| Average RCC of <b>1-<sup>18</sup>F</b> from <b>1-F</b> : <b>79.7±1.1%</b> (n=3)  |                                              |                                   |               |                |                |                      |                                |
| 8                                                                                | <b>1-NO<sub>2</sub></b> (X=NO <sub>2</sub> ) | 12.44 mCi                         | 496 μCi       | --             | --             | --                   | n.d.                           |
| 9                                                                                |                                              | 16.11 mCi                         | 501 μCi       | --             | --             | --                   | n.d.                           |
| 10                                                                               |                                              | 8.24 mCi                          | 313 μCi       | 29 μCi         | 16 min         | 32.1 μCi             | 10.3%                          |
| 11                                                                               | <b>1-OTf</b> (X=OTf)                         | 12.10 mCi                         | 357 μCi       | 42 μCi         | 16 min         | 46.5 μCi             | 13.0%                          |
| 12                                                                               |                                              | 12.06 mCi                         | 369 μCi       | 38 μCi         | 17 min         | 42.3 μCi             | 11.5%                          |

---

Average RCC of **1-<sup>18</sup>F** from **1-OTf**: **11.6±1.1%** (n=3)

---

n.d., not detected

**Supplementary Table 2.** HPLC-isolated RCCs for **1-<sup>18</sup>F**

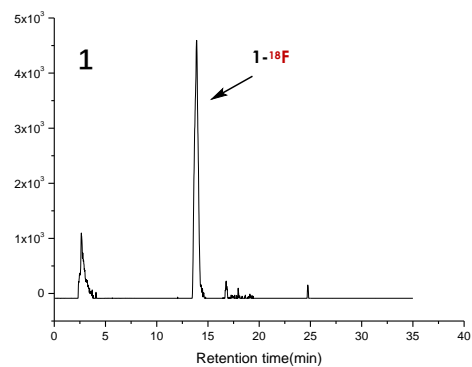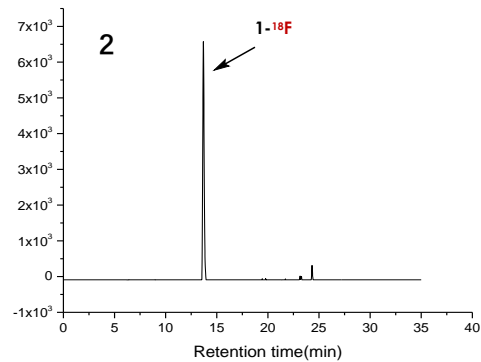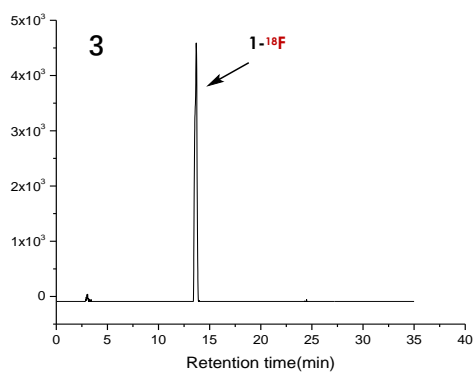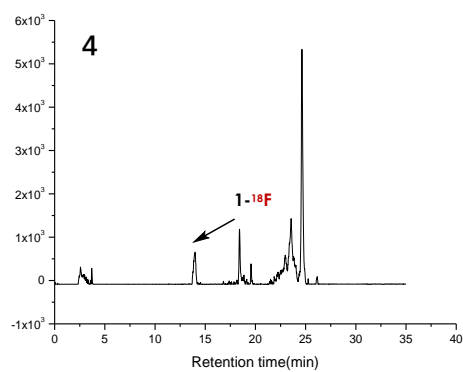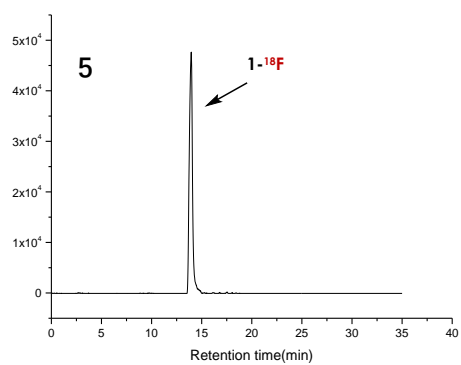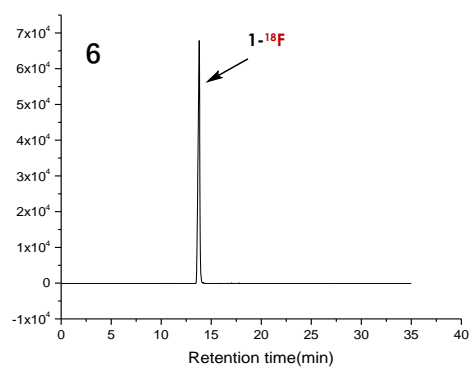

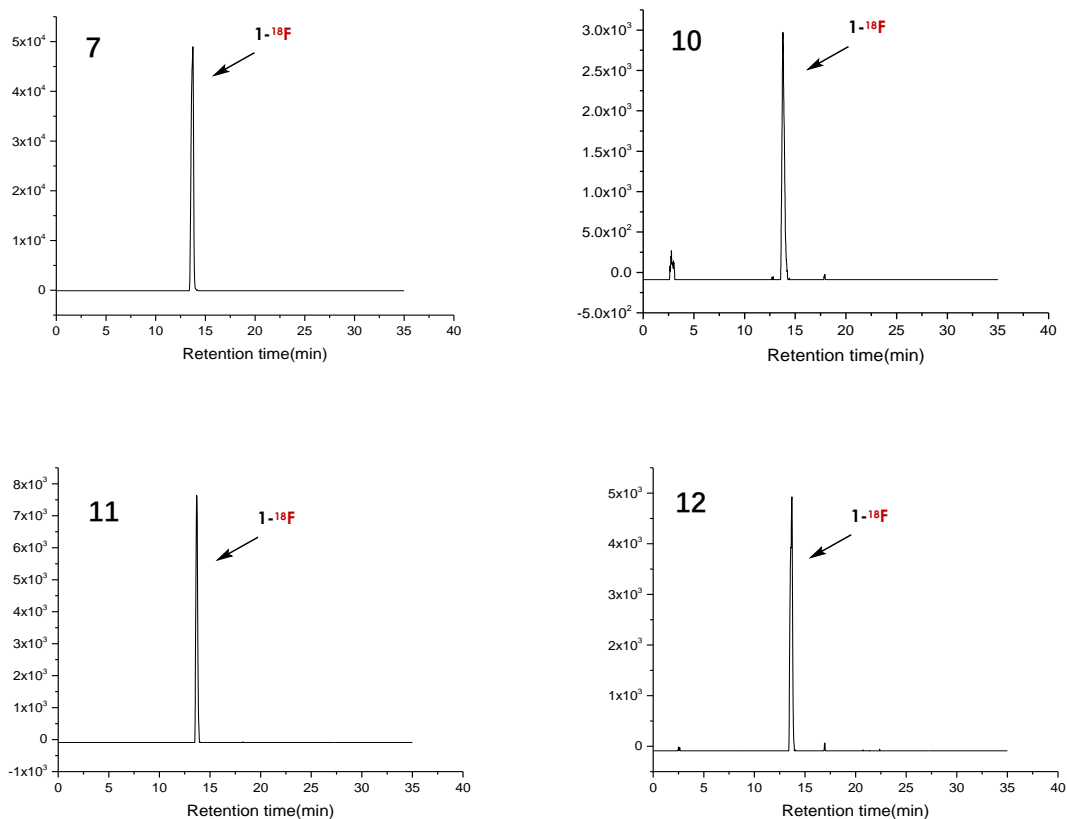

**Supplementary Figure 10.** Crude radio-HPLC traces from **1-Br,1-I, 1-F,1-OTf** to **1-<sup>18</sup>F**

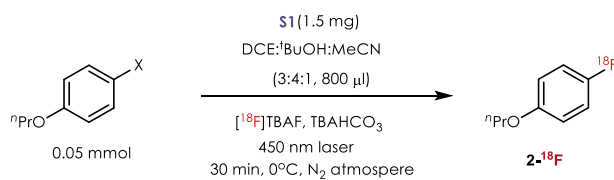

| Reaction                                           | Substrate | Activity ([ <sup>18</sup> F]TBAF) | Injected dose | Collected dose | Isolation time | Decay corrected dose | Radiochemical conversion (RCC) |
|----------------------------------------------------|-----------|-----------------------------------|---------------|----------------|----------------|----------------------|--------------------------------|
| 1                                                  | 2         | 10.56 mCi                         | 536 $\mu$ Ci  | 62 $\mu$ Ci    | 20 min         | 70.3 $\mu$ Ci        | 13.1%                          |
| 2                                                  |           | 10.76 mCi                         | 482 $\mu$ Ci  | 64 $\mu$ Ci    | 21 min         | 73.1 $\mu$ Ci        | 15.2%                          |
| 3                                                  |           | 11.39 mCi                         | 679 $\mu$ Ci  | 68 $\mu$ Ci    | 20 min         | 77.2 $\mu$ Ci        | 11.4%                          |
| Average RCC: <b>13.2<math>\pm</math>1.6%</b> (n=3) |           |                                   |               |                |                |                      |                                |

**Supplementary Table 3.** HPLC-isolated RCCs of **2-<sup>18</sup>F**

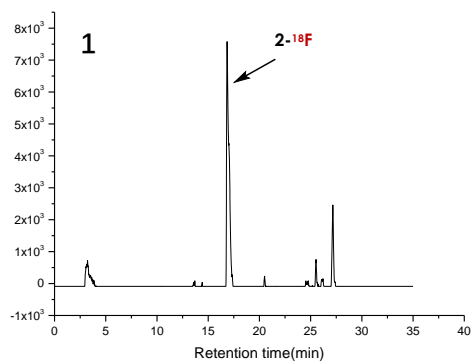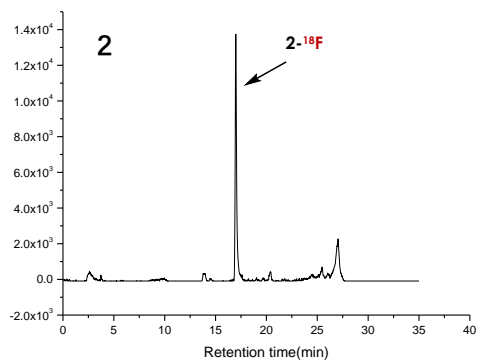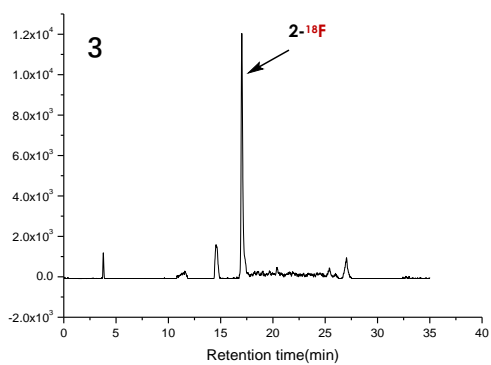

Supplementary Figure 11. Crude radio-HPLC traces from **2** to  $2\text{-}^{18}\text{F}$

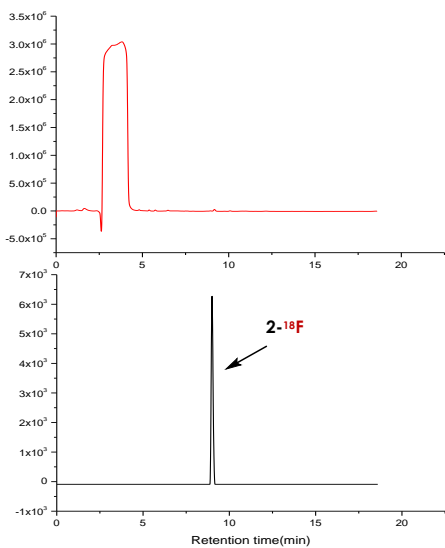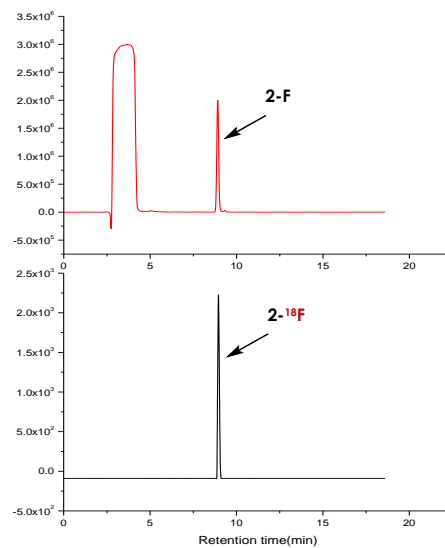

Supplementary Figure 12. Purification (left) and co-injection(right) for  $2\text{-}^{18}\text{F}$

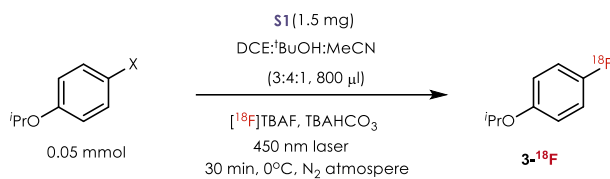

| Reaction                            | Substrate | Activity ( $[^{18}\text{F}]\text{TBAF}$ ) | Injected dose      | Collected dose     | Isolation time | Decay corrected dose | Radiochemical conversion (RCC) |
|-------------------------------------|-----------|-------------------------------------------|--------------------|--------------------|----------------|----------------------|--------------------------------|
| 1                                   | 3         | 8.42 mCi                                  | 867 $\mu\text{Ci}$ | 212 $\mu\text{Ci}$ | 20 min         | 240.5 $\mu\text{Ci}$ | 27.7%                          |
| 2                                   |           | 8.97 mCi                                  | 619 $\mu\text{Ci}$ | 201 $\mu\text{Ci}$ | 20 min         | 228.1 $\mu\text{Ci}$ | 36.8%                          |
| 3                                   |           | 13.87 mCi                                 | 671 $\mu\text{Ci}$ | 138 $\mu\text{Ci}$ | 21 min         | 157.6 $\mu\text{Ci}$ | 23.5%                          |
| Average RCC: $29.3 \pm 5.6\%$ (n=3) |           |                                           |                    |                    |                |                      |                                |

**Supplementary Table 4.** HPLC-isolated RCCs of  $3\text{-}^{18}\text{F}$

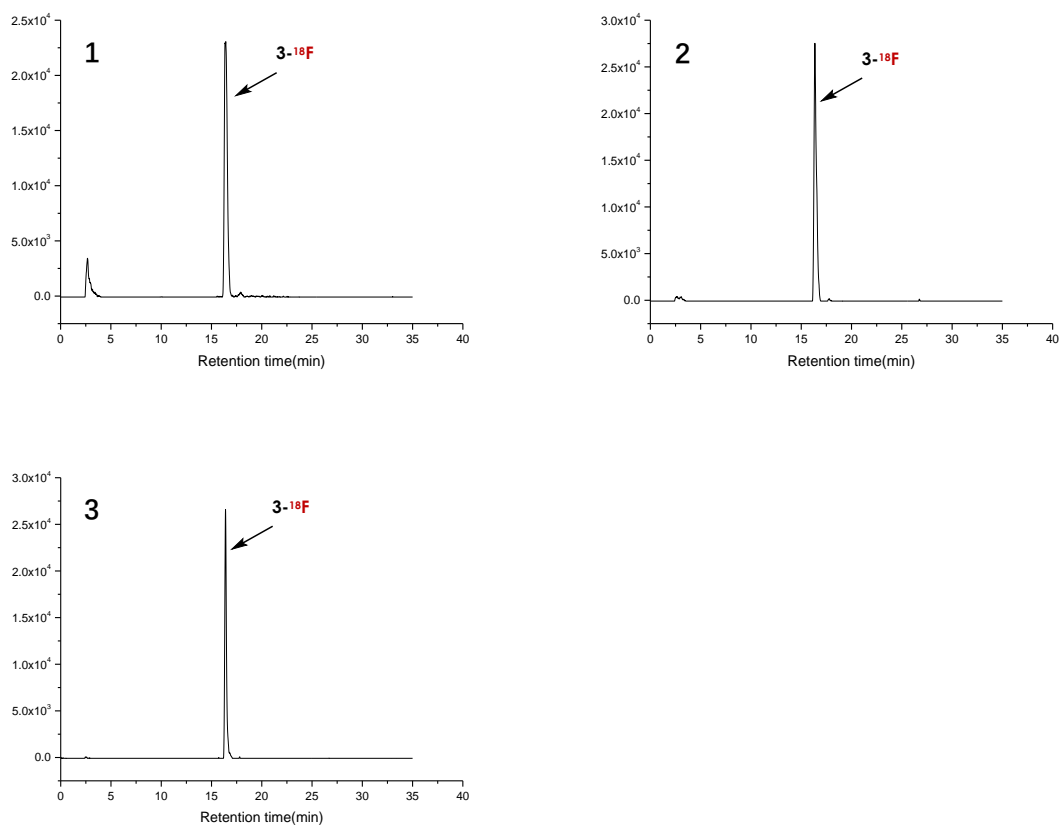

**Supplementary Figure 13.** Crude radio-HPLC traces from **3** to  $3\text{-}^{18}\text{F}$

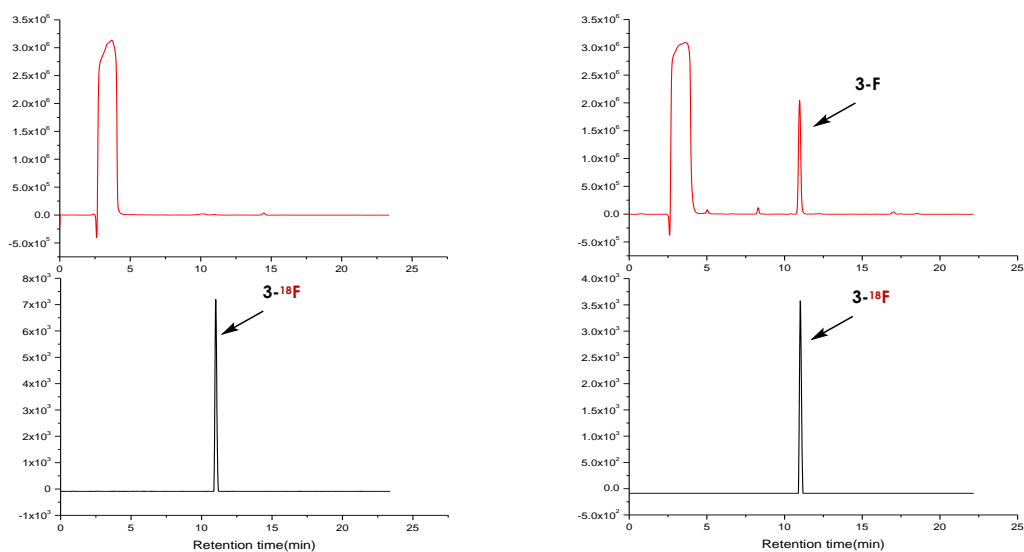

Supplementary Figure 14. Purification (left) and co-injection(right) for **3-<sup>18</sup>F**

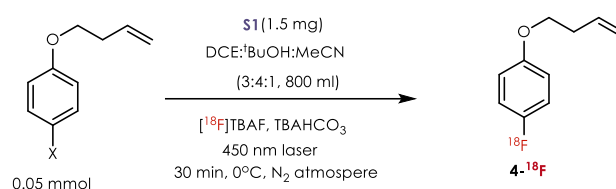

| Reaction                                                                         | Substrate          | Activity ([ <sup>18</sup> F]TBAF) | Injected dose | Collected dose | Isolation time | Decay corrected dose | Radiochemical conversion (RCC) |
|----------------------------------------------------------------------------------|--------------------|-----------------------------------|---------------|----------------|----------------|----------------------|--------------------------------|
| 1                                                                                |                    | 8.73 mCi                          | 409 μCi       | 46 μCi         | 24 min         | 53.5 μCi             | 13.1%                          |
| 2                                                                                | <b>4-Cl (X=Cl)</b> | 9.85 mCi                          | 302 μCi       | 34 μCi         | 19 min         | 38.3 μCi             | 12.6%                          |
| 3                                                                                |                    | 8.41 mCi                          | 354 μCi       | 36 μCi         | 19 min         | 40.6 μCi             | 11.5%                          |
| Average RCC of <b>4-<sup>18</sup>F</b> from <b>4-Cl</b> : <b>12.4±0.7%</b> (n=3) |                    |                                   |               |                |                |                      |                                |
| 4                                                                                | <b>4-F (X=F)</b>   | 12.99 mCi                         | 811 μCi       | 577 μCi        | 21 min         | 658.8 μCi            | 81.2%                          |
| 5                                                                                |                    | 6.82 mCi                          | 235 μCi       | 156 μCi        | 20 min         | 177.0 μCi            | 75.3%                          |
| 6                                                                                |                    | 6.79 mCi                          | 310 μCi       | 216 μCi        | 20 min         | 245.1 μCi            | 79.1%                          |
| Average RCC of <b>4-<sup>18</sup>F</b> from <b>4-F</b> : <b>78.5±2.4%</b> (n=3)  |                    |                                   |               |                |                |                      |                                |

Supplementary Table 5. HPLC-isolated RCCs of **4-<sup>18</sup>F**



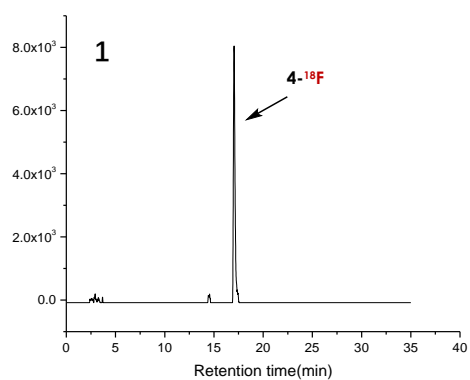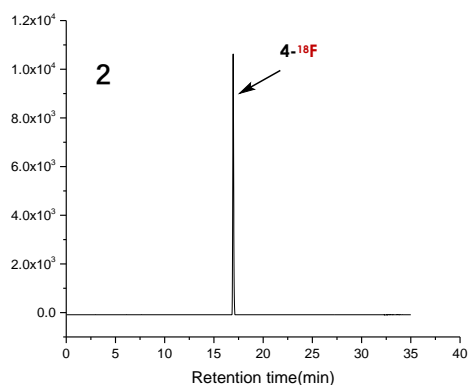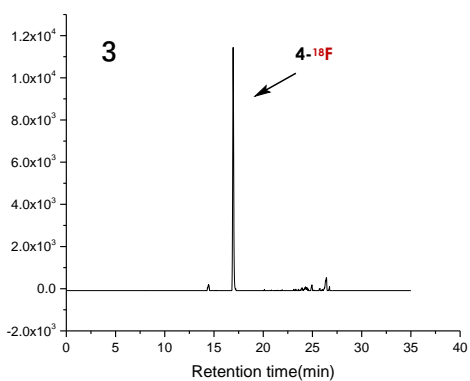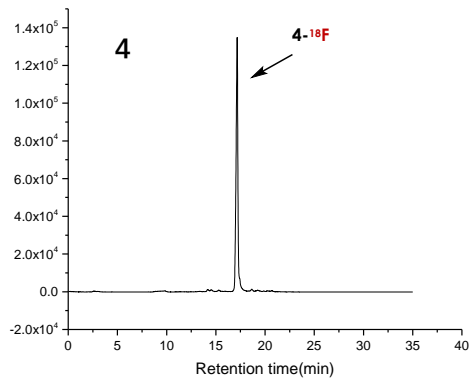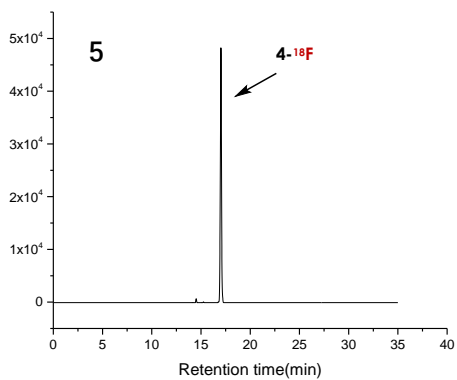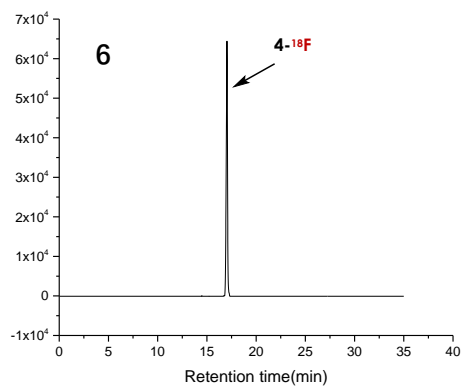

Supplementary Figure 15. Crude radio-HPLC traces from **4-Cl** and **4-F** to **4-<sup>18</sup>F**

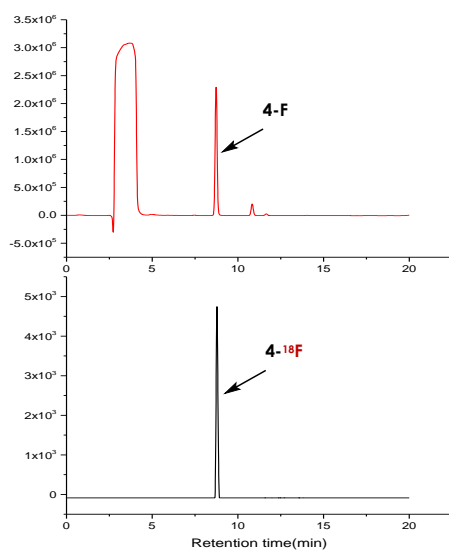

Supplementary Figure 16. HPLC trace of purification of **4-<sup>18</sup>F** from **4-F**

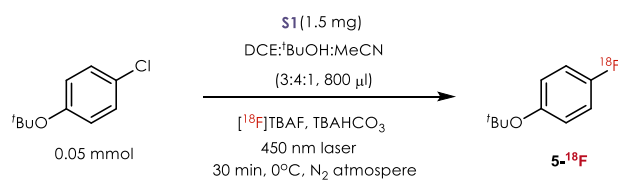

| Reaction                                 | Substrate               | Activity ([ <sup>18</sup> F]TBAF) | Injected dose | Collected dose | Isolation time | Decay corrected dose | Radiochemical conversion (RCC) |
|------------------------------------------|-------------------------|-----------------------------------|---------------|----------------|----------------|----------------------|--------------------------------|
| 1                                        |                         | 11.68 mCi                         | 445 μCi       | 238 μCi        | 19 min         | 268.3 μCi            | 60.3%                          |
| 2                                        | <b>5-Cl</b>             | 11.55 mCi                         | 540 μCi       | 242 μCi        | 19 min         | 272.8 μCi            | 50.5%                          |
| 3                                        |                         | 10.56 mCi                         | 443 μCi       | 263 μCi        | 20 min         | 298.4 μCi            | 67.4%                          |
| Average RCC: <b>59.4±6.6%</b> (n=3)      |                         |                                   |               |                |                |                      |                                |
| 4                                        | <b>5-Cl<sup>a</sup></b> | 12.03 mCi                         | 747 μCi       | 165 μCi        | 20 min         | 187.2 μCi            | 25.1%                          |
| 5                                        |                         | 7.99 mCi                          | 374 μCi       | 166 μCi        | 20 min         | 188.3 μCi            | 50.4%                          |
| 6                                        |                         | 6.70 mCi                          | 348 μCi       | 113 μCi        | 19 min         | 133.0 μCi            | 38.2%                          |
| 7                                        |                         | 9.35 mCi                          | 348 μCi       | 130 μCi        | 18 min         | 145.6 μCi            | 41.9%                          |
| Average RCC: <b>38.9±9.1%</b> (n=4, LED) |                         |                                   |               |                |                |                      |                                |

<sup>a</sup>Blue LED was used instead of laser.

Supplementary Table 6. HPLC-isolated RCCs of **5-<sup>18</sup>F**

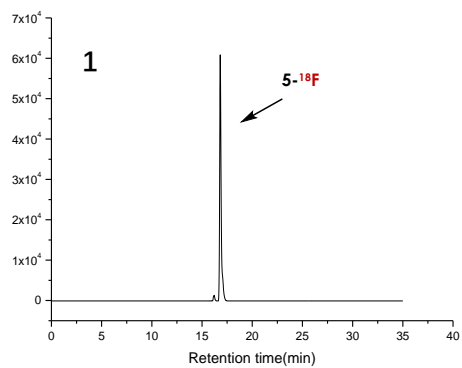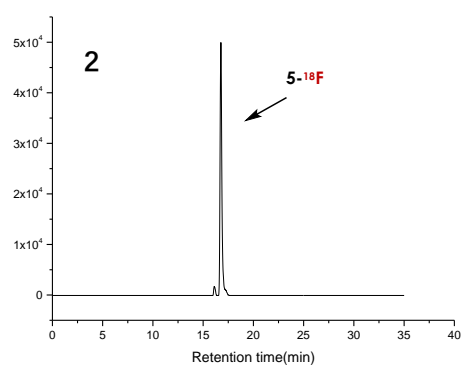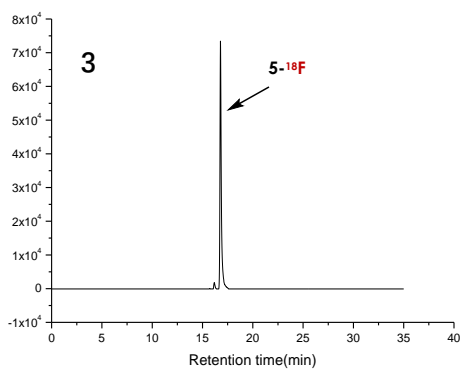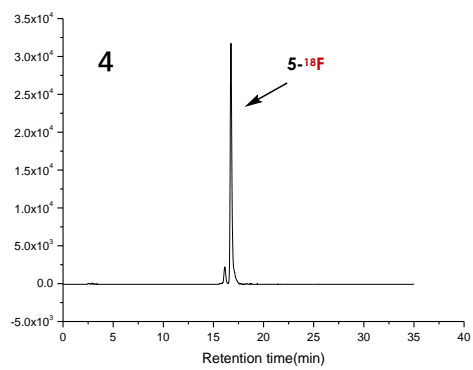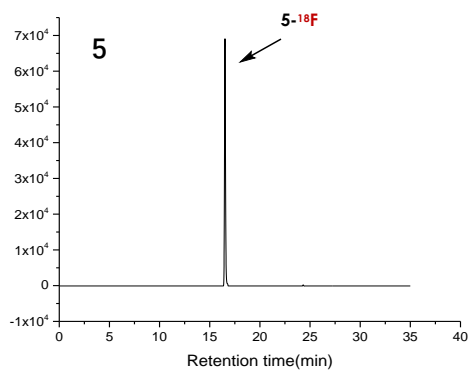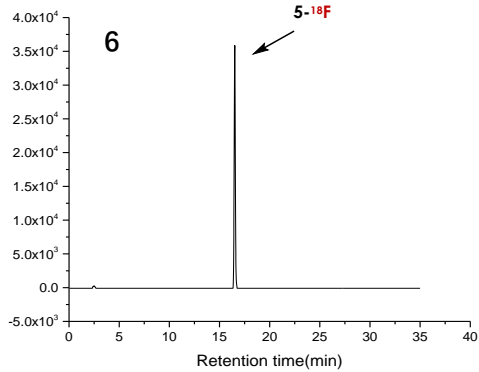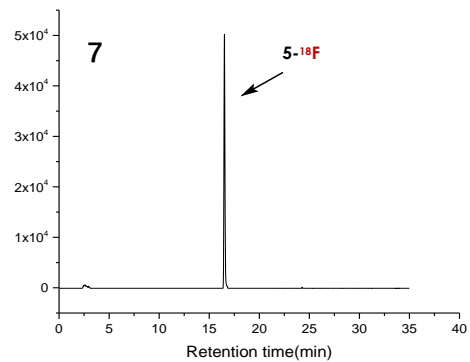

Supplementary Figure 17. Crude radio-HPLC traces from 5-Cl to 5-<sup>18</sup>F

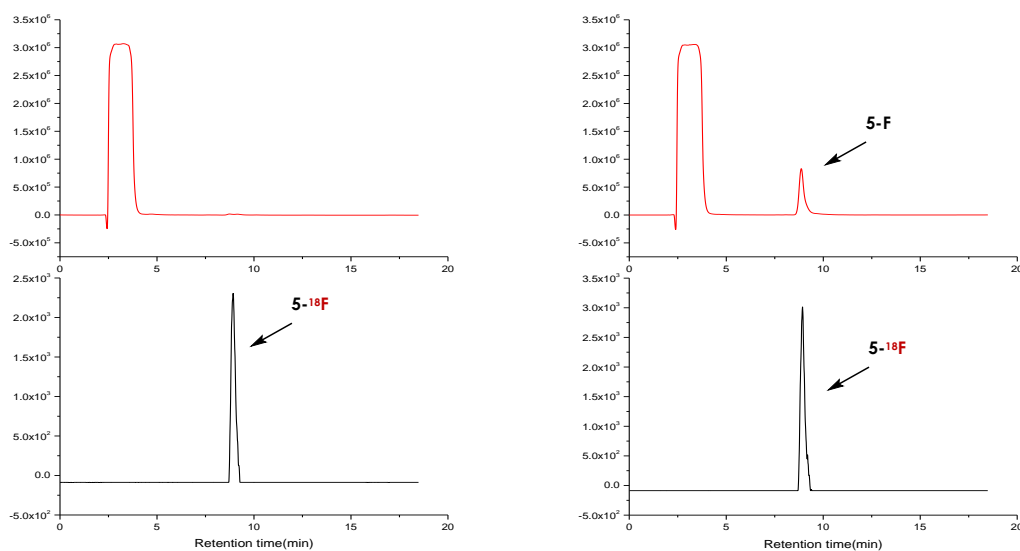

Supplementary Figure 18. Purification (left) and co-injection(right) for 5-<sup>18</sup>F

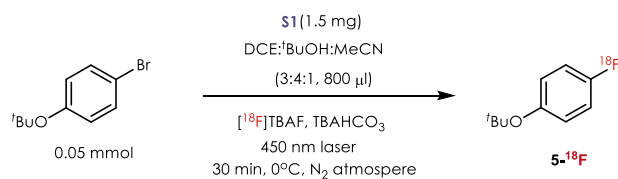

| Reaction | Substrate | Activity ([ <sup>18</sup> F]TBAF) | Injected dose | Collected dose | Isolation time | Decay corrected dose | Radiochemical conversion (RCC) |
|----------|-----------|-----------------------------------|---------------|----------------|----------------|----------------------|--------------------------------|
| 1        |           | 13.05 mCi                         | 446 $\mu$ Ci  | 179 $\mu$ Ci   | 20 min         | 203.1 $\mu$ Ci       | 45.5%                          |
| 2        | 5-Br      | 9.95 mCi                          | 410 $\mu$ Ci  | 200 $\mu$ Ci   | 19 min         | 225.5 $\mu$ Ci       | 55%                            |
| 3        |           | 9.2 mCi                           | 273 $\mu$ Ci  | 93 $\mu$ Ci    | 21 min         | 106.2 $\mu$ Ci       | 38.9%                          |

Average RCC: **46.5 $\pm$ 7.0%** (n=3)

Supplementary Table 7. HPLC-isolated RCCs of 5-<sup>18</sup>F

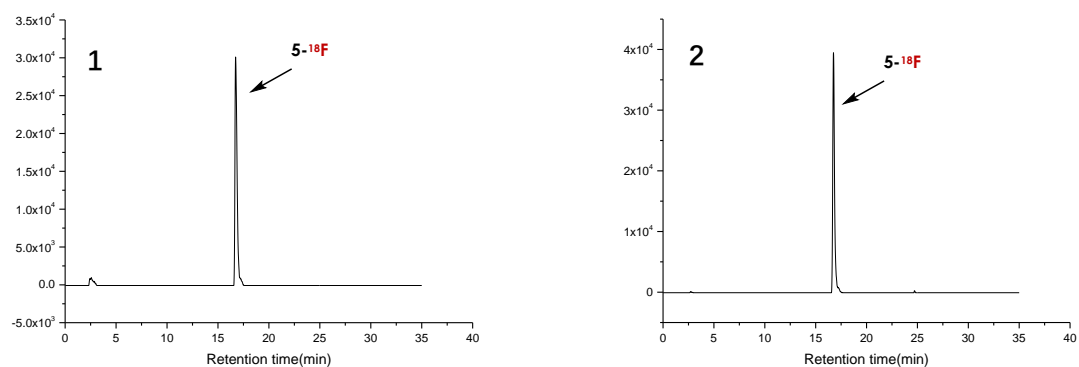

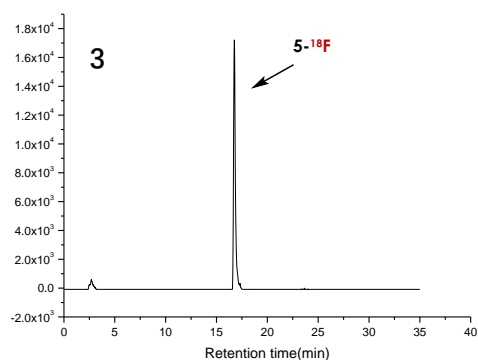

**Supplementary Figure 19.** Crude radio-HPLC traces from **5-Br** to **5-<sup>18</sup>F**

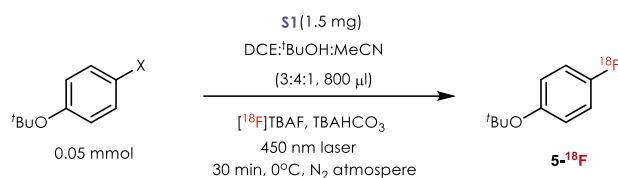

| Reaction                                                                               | Substrate              | Activity ([ <sup>18</sup> F]TBAF) | Injected dose | Collected dose | Isolation time | Decay corrected dose | Radiochemical conversion (RCC) |
|----------------------------------------------------------------------------------------|------------------------|-----------------------------------|---------------|----------------|----------------|----------------------|--------------------------------|
| 1                                                                                      | 5-I (X=I)              | 14.71 mCi                         | 778 μCi       | 21 μCi         | 20 min         | 23.8 μCi             | 3.1%                           |
| 2                                                                                      |                        | 10.68 mCi                         | 775 μCi       | 599 μCi        | 20 min         | 679.6 μCi            | 87.7%                          |
| 3                                                                                      | 5-F (X=F)              | 5.90 mCi                          | 336 μCi       | 268 μCi        | 19 min         | 302.2 μCi            | 89.9%                          |
| 4                                                                                      |                        | 11.98 mCi                         | 489 μCi       | 366 μCi        | 20 min         | 415.3 μCi            | 84.9%                          |
| Average RCC of <b>5-<sup>18</sup>F</b> from <b>5-F</b> : <b>87.5±2.0%</b> (n=3, laser) |                        |                                   |               |                |                |                      |                                |
| 5                                                                                      |                        | 11.64 mCi                         | 322 uCi       | 233 uCi        | 20 min         | 264.4 uCi            | 82.1%                          |
| 6                                                                                      | 5-F (X=F) <sup>a</sup> | 9.53 mCi                          | 403 uCi       | 301 uCi        | 19 min         | 339.4 uCi            | 84.2%                          |
| 7                                                                                      |                        | 6.52 mCi                          | 435 uCi       | 298 uCi        | 20 min         | 338.1 uCi            | 77.7%                          |
| Average RCC of <b>5-<sup>18</sup>F</b> from <b>5-F</b> : <b>81.3±2.7%</b> (n=3, LED)   |                        |                                   |               |                |                |                      |                                |

<sup>a</sup>Blue LED was used instead of laser.

**Supplementary Table 8.** HPLC-isolated RCCs of **5-<sup>18</sup>F**

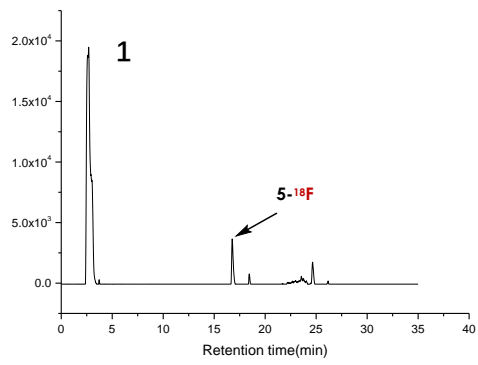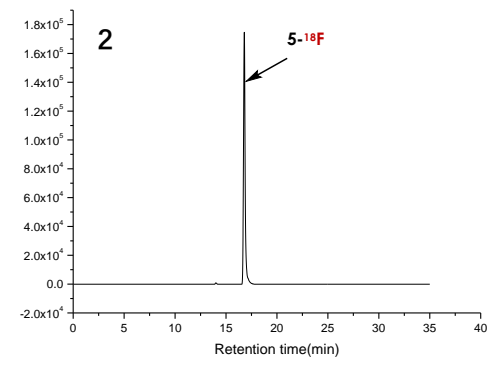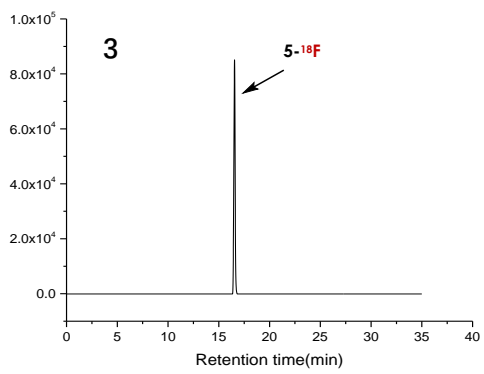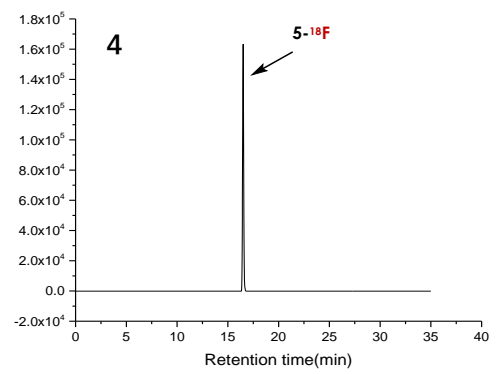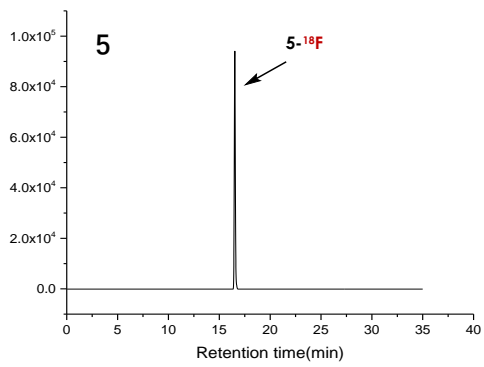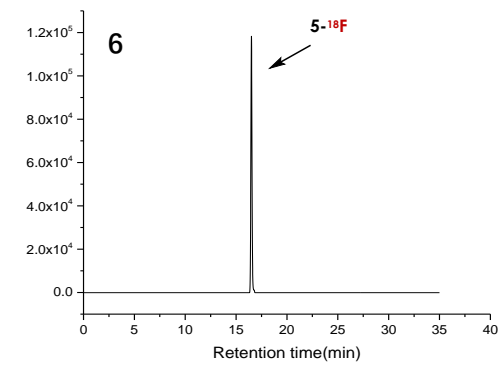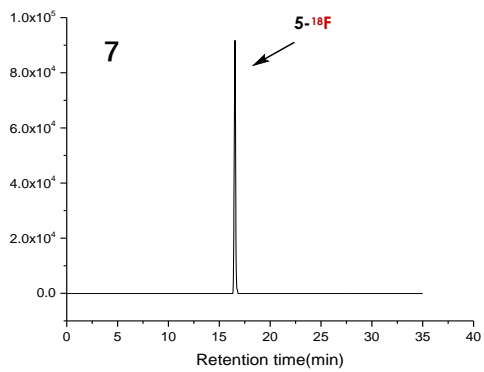

**Supplementary Figure 20.** Crude radio-HPLC traces from **5-I** and **5-F** to **6-<sup>18</sup>F**

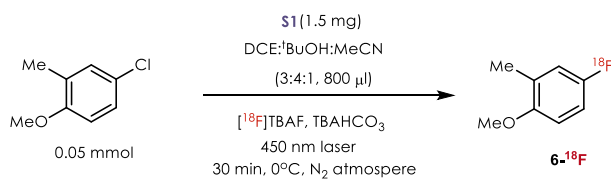

| Reaction | Substrate | Activity ([ <sup>18</sup> F]TBAF) | Injected dose | Collected dose | Isolation time | Decay corrected dose | Radiochemical conversion (RCC) |
|----------|-----------|-----------------------------------|---------------|----------------|----------------|----------------------|--------------------------------|
| 1        |           | 10.89 mCi                         | 344 $\mu$ Ci  | 46 $\mu$ Ci    | 19 min         | 51.9 $\mu$ Ci        | 15.1%                          |
| 2        | <b>6</b>  | 10.97 mCi                         | 588 $\mu$ Ci  | 75 $\mu$ Ci    | 19 min         | 84.6 $\mu$ Ci        | 14.4%                          |
| 3        |           | 21.2 mCi                          | 611 $\mu$ Ci  | 87 $\mu$ Ci    | 19 min         | 98.1 $\mu$ Ci        | 16.1%                          |

Average RCC: **15.2 $\pm$ 0.7%** (n=3)

**Supplementary Table 9.** HPLC-isolated RCCs of **6-<sup>18</sup>F**

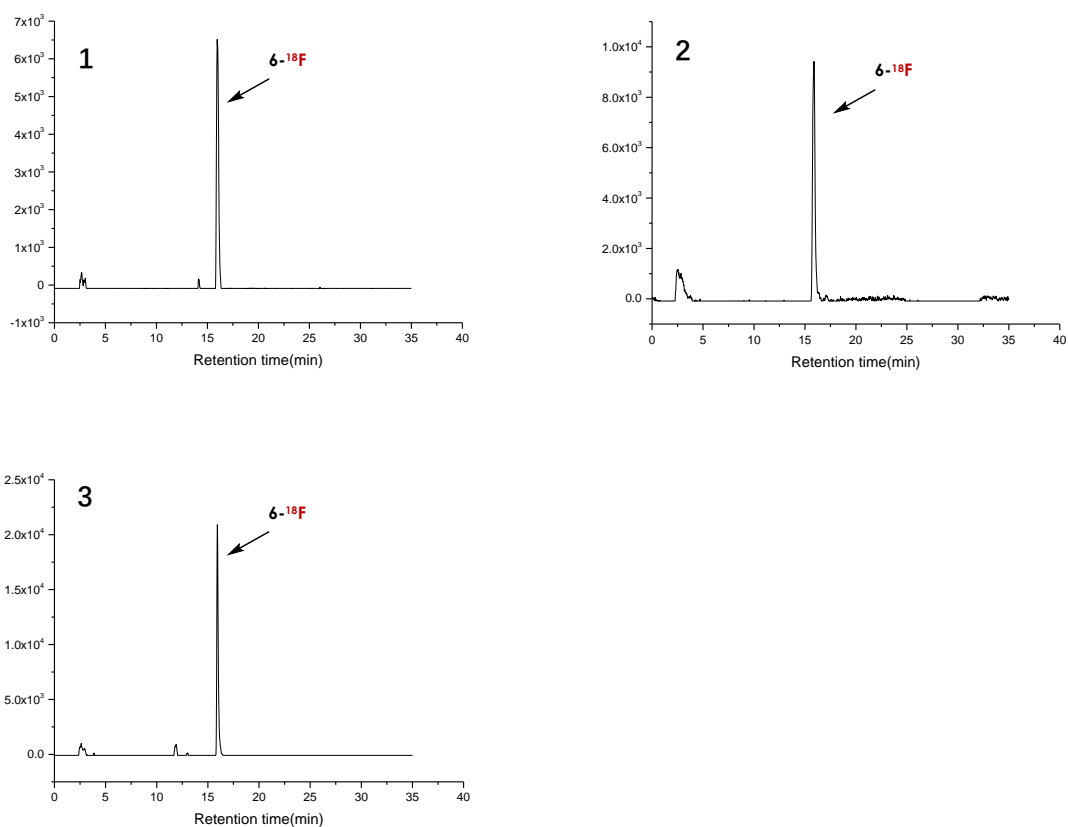

**Supplementary Figure 21.** Crude radio-HPLC traces from **6** to **6-<sup>18</sup>F**

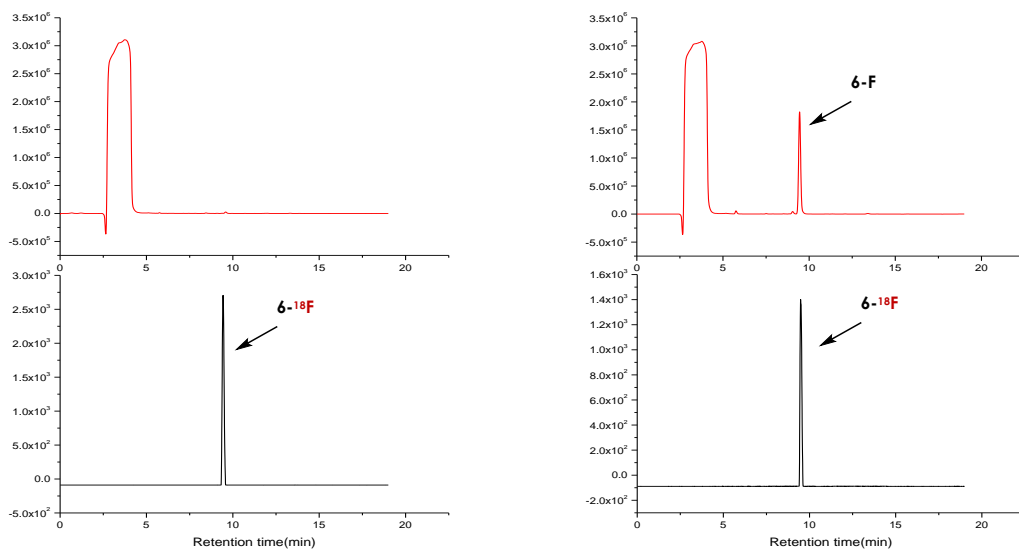

Supplementary Figure 22. Purification (left) and co-injection(right) for **6-<sup>18</sup>F**

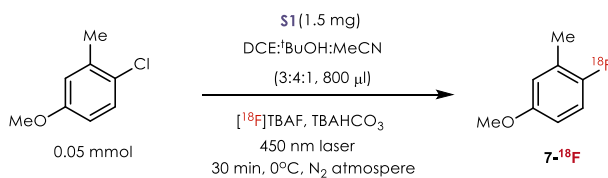

| Reaction | Substrate | Activity ([ <sup>18</sup> F]TBAF) | Injected dose | Collected dose | Isolation time | Decay corrected dose | Radiochemical conversion (RCC) |
|----------|-----------|-----------------------------------|---------------|----------------|----------------|----------------------|--------------------------------|
| 1        |           | 9.38 mCi                          | 524 $\mu$ Ci  | 172 $\mu$ Ci   | 19 min         | 193.9 $\mu$ Ci       | 37%                            |
| 2        | 7         | 9.01 mCi                          | 784 $\mu$ Ci  | 310 $\mu$ Ci   | 18 min         | 347.3 $\mu$ Ci       | 44.3%                          |
| 3        |           | 15.32 mCi                         | 538 $\mu$ Ci  | 155 $\mu$ Ci   | 18 min         | 173.7 $\mu$ Ci       | 32.3%                          |

Average RCC: **37.9 $\pm$ 5.0%** (n=3)

Supplementary Table 10. HPLC-isolated RCCs of **7-<sup>18</sup>F**

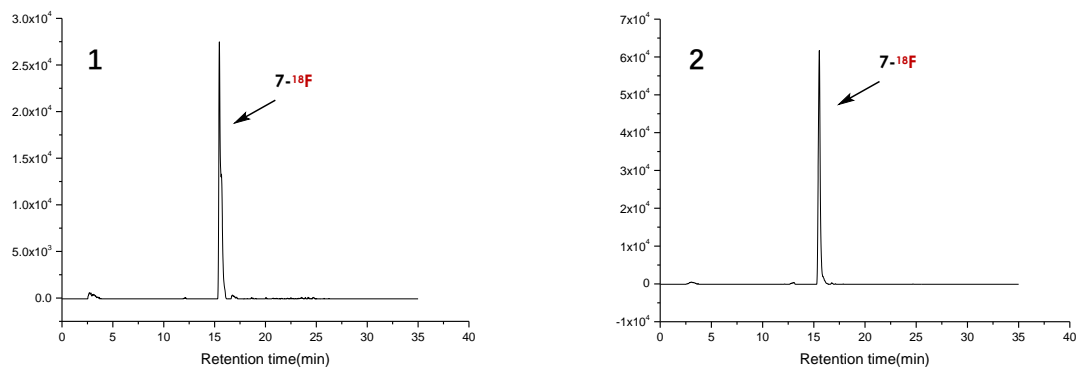



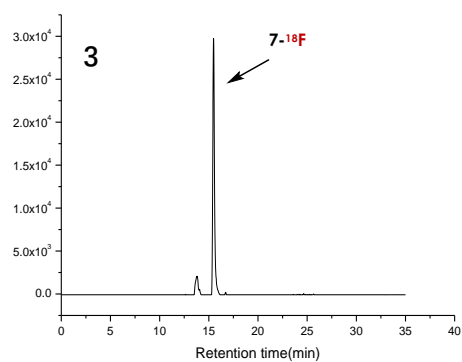

Supplementary Figure 23. Crude radio-HPLC traces from **7** to **7-<sup>18</sup>F**

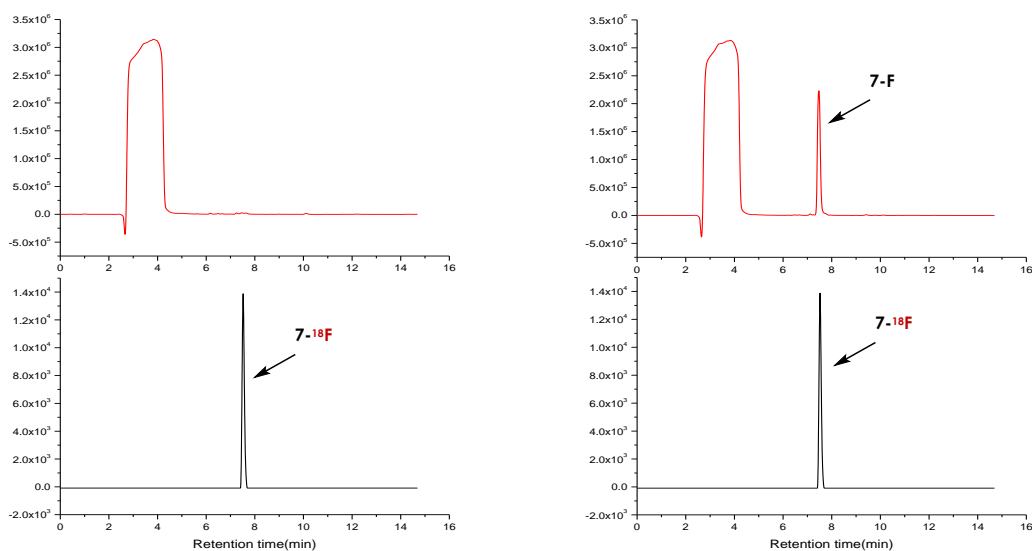

Supplementary Figure 24. Purification (left) and co-injection(right) for **7-<sup>18</sup>F**

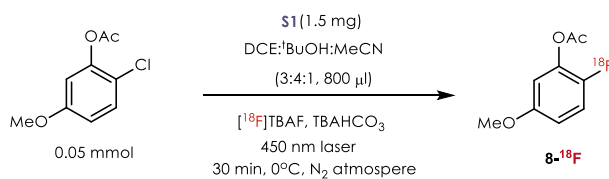

| Reaction                                           | Substrate | Activity ([ <sup>18</sup> F]TBAF) | Injected dose | Collected dose | Isolation time | Decay corrected dose | Radiochemical conversion (RCC) |
|----------------------------------------------------|-----------|-----------------------------------|---------------|----------------|----------------|----------------------|--------------------------------|
| 1                                                  |           | 10.94 mCi                         | 463 $\mu$ Ci  | 74 $\mu$ Ci    | 17 min         | 82.4 $\mu$ Ci        | 17.8%                          |
| 2                                                  | <b>8</b>  | 11.43 mCi                         | 932 $\mu$ Ci  | 151 $\mu$ Ci   | 16 min         | 167.1 $\mu$ Ci       | 17.9%                          |
| 3                                                  |           | 8.47 mCi                          | 412 $\mu$ Ci  | 100 $\mu$ Ci   | 16 min         | 110.6 $\mu$ Ci       | 26.8%                          |
| Average RCC: <b>20.8<math>\pm</math>4.0%</b> (n=3) |           |                                   |               |                |                |                      |                                |

Supplementary Table 11. HPLC-isolated RCCs of **8-<sup>18</sup>F**

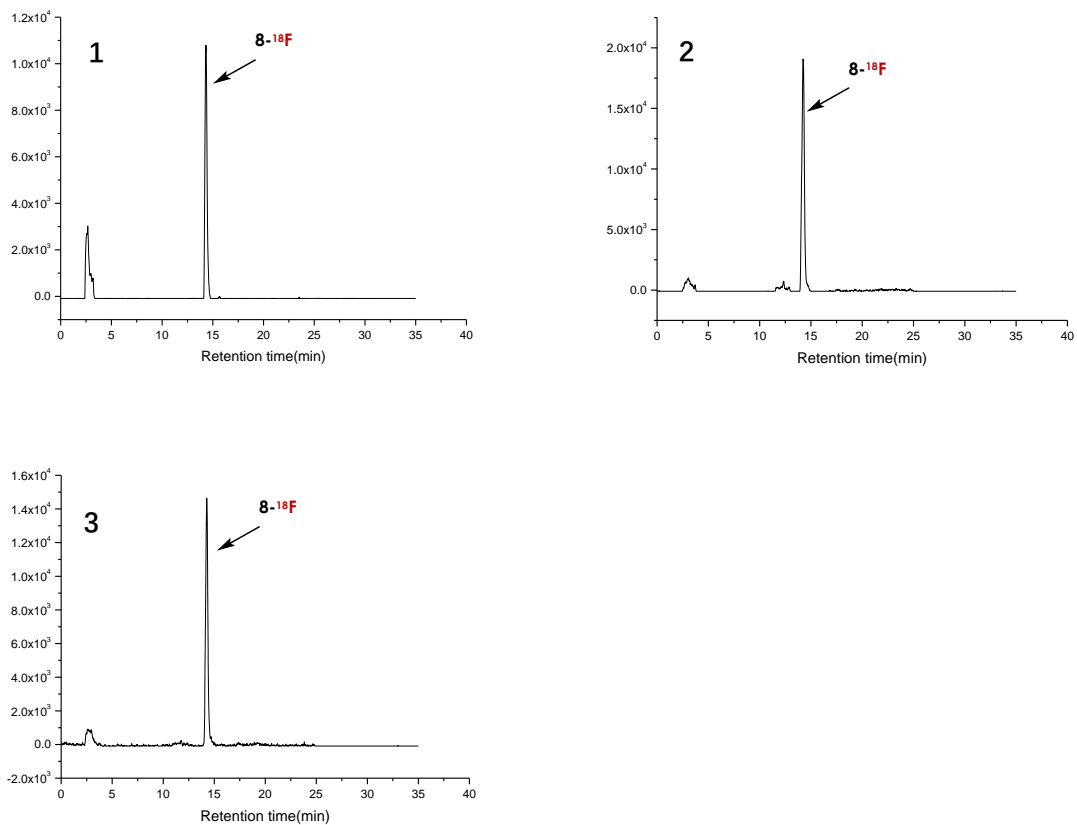

Supplementary Figure 25. Crude radio-HPLC traces from **8** to **8-<sup>18</sup>F**

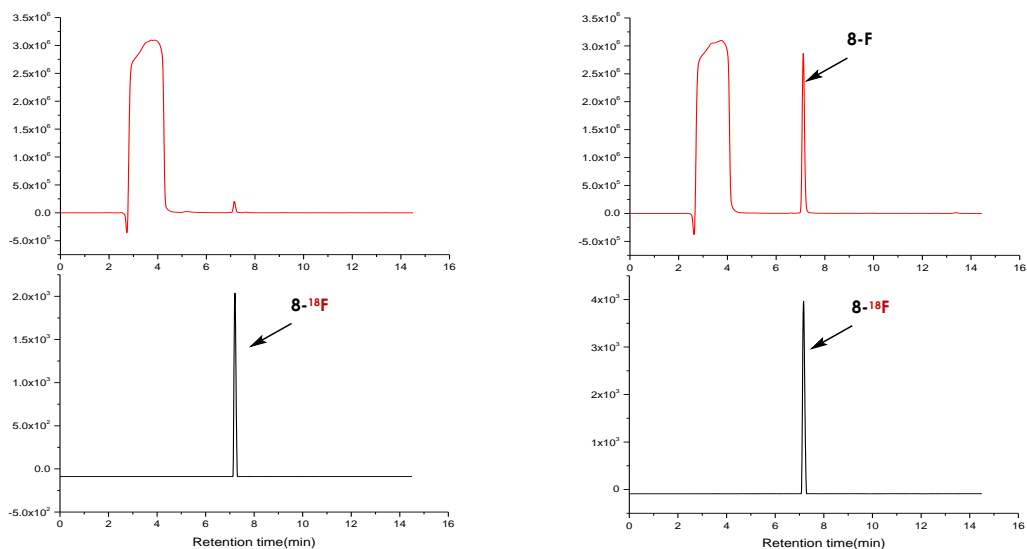

Supplementary Figure 26. Purification (left) and co-injection(right) for **8-<sup>18</sup>F**

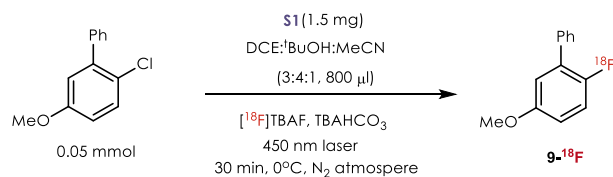

| Reaction | Substrate | Activity ( $[^{18}\text{F}]\text{TBAF}$ ) | Injected dose      | Collected dose     | Isolation time | Decay corrected dose | Radiochemical conversion (RCC) |
|----------|-----------|-------------------------------------------|--------------------|--------------------|----------------|----------------------|--------------------------------|
| 1        | 9         | 12.07 mCi                                 | 518 $\mu\text{Ci}$ | 180 $\mu\text{Ci}$ | 22 min         | 206.8 $\mu\text{Ci}$ | 39.9%                          |
| 2        |           | 11.84 mCi                                 | 702 $\mu\text{Ci}$ | 244 $\mu\text{Ci}$ | 22 min         | 280.4 $\mu\text{Ci}$ | 39.9%                          |
| 3        |           | 10.21 mCi                                 | 668 $\mu\text{Ci}$ | 240 $\mu\text{Ci}$ | 21 min         | 274.0 $\mu\text{Ci}$ | 41.0%                          |

Average RCC:  $40.3 \pm 0.5\%$  (n=3)

**Supplementary Table 12.** HPLC-isolated RCCs of  $9\text{-}^{18}\text{F}$

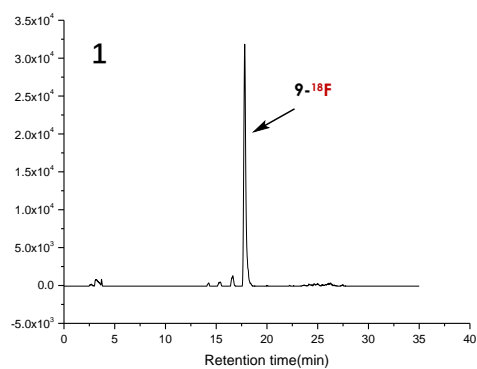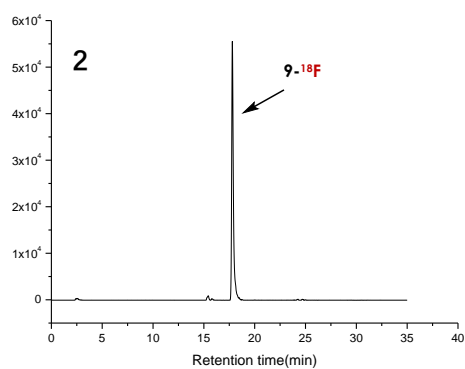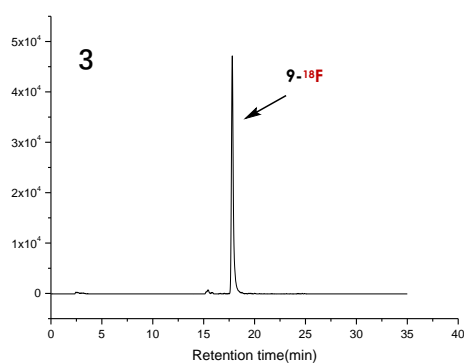

**Supplementary Figure 27.** Crude radio-HPLC traces from 9 to  $9\text{-}^{18}\text{F}$

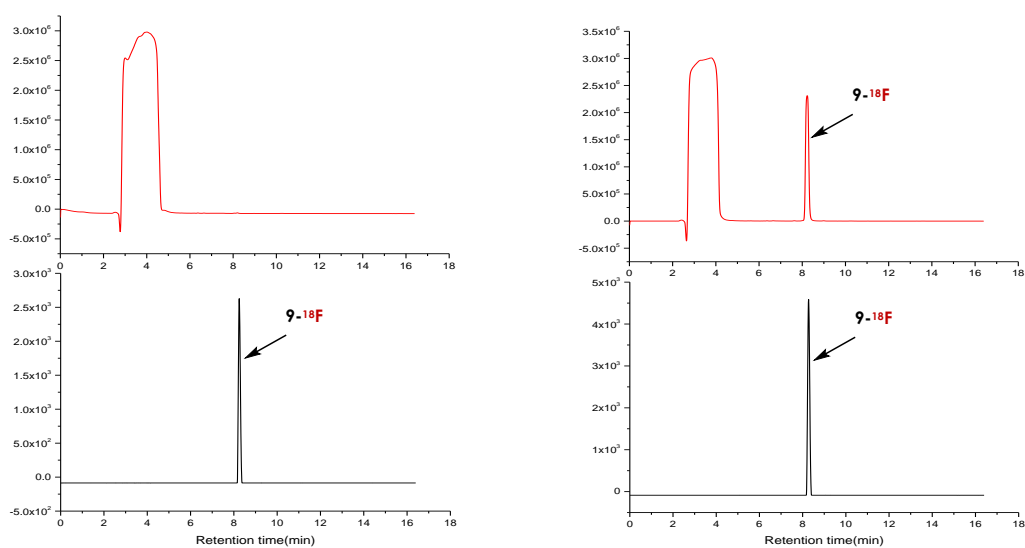

**Supplementary Figure 28.** Purification (left) and co-injection(right) for **9-<sup>18</sup>F**

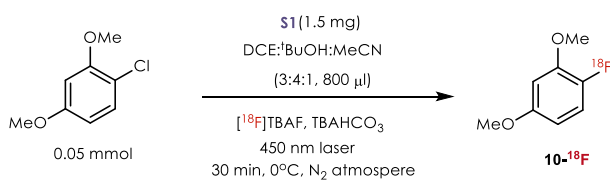

| Reaction | Substrate    | Activity ([ <sup>18</sup> F]TBAF) | Injected dose | Collected dose | Isolation time | Decay corrected dose | Radiochemical conversion (RCC) |
|----------|--------------|-----------------------------------|---------------|----------------|----------------|----------------------|--------------------------------|
| 1        |              | 12.32 mCi                         | 506 $\mu$ Ci  | 364 $\mu$ Ci   | 17 min         | 405.2 $\mu$ Ci       | 80.1%                          |
| 2        | <b>10-Cl</b> | 9.82 mCi                          | 520 $\mu$ Ci  | 336 $\mu$ Ci   | 17 min         | 225.5 $\mu$ Ci       | 71.9%                          |
| 3        |              | 14.71 mCi                         | 450 $\mu$ Ci  | 301 $\mu$ Ci   | 16 min         | 333.0 $\mu$ Ci       | 74.0%                          |

Average RCC: **75.3 $\pm$ 3.5%** (n=3)

**Supplementary Table 13.** HPLC-isolated RCCs of **10-<sup>18</sup>F**

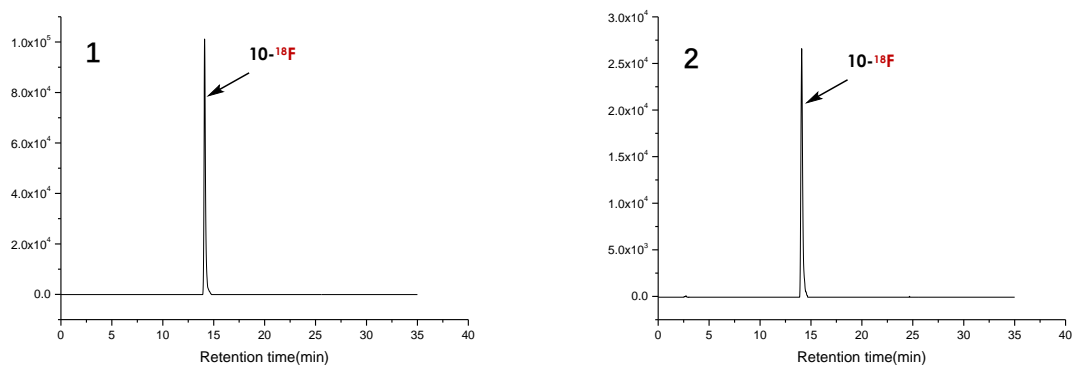

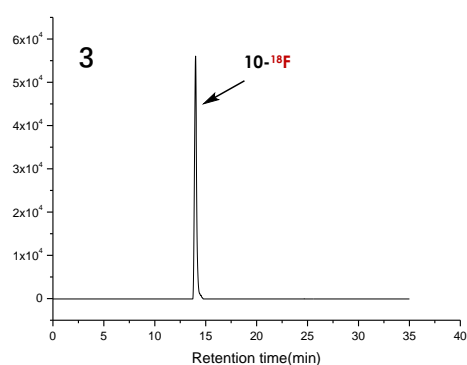

Supplementary Figure 29. Crude radio-HPLC traces from **10-Cl** to **10-<sup>18</sup>F**

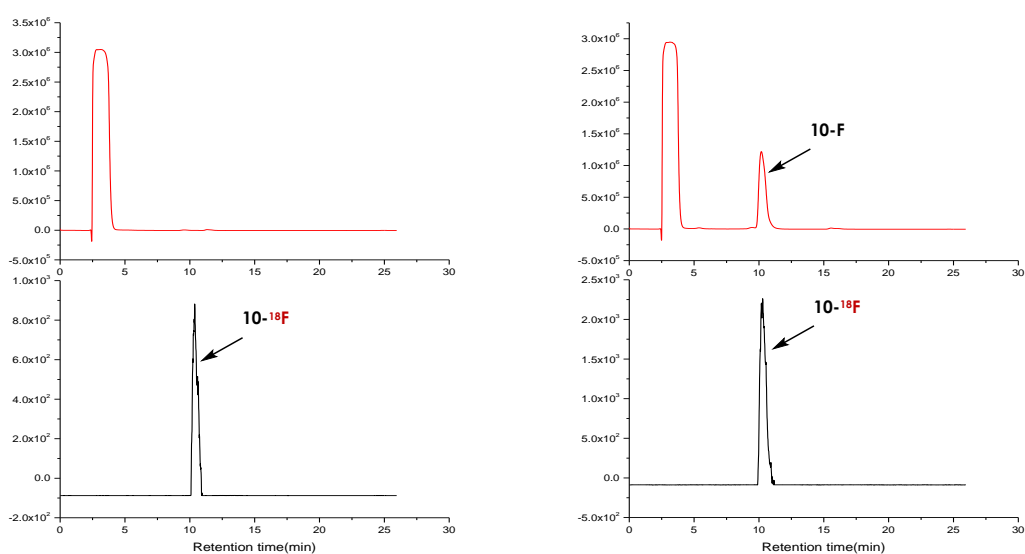

Supplementary Figure 30. Purification (left) and co-injection(right) for **10-<sup>18</sup>F**

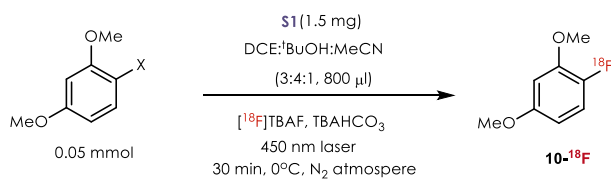

| Reaction                                                                                          | Substrate           | Activity ([ <sup>18</sup> F]TBAF) | Injected dose | Collected dose | Isolation time | Decay corrected dose | Radiochemical conversion (RCC) |
|---------------------------------------------------------------------------------------------------|---------------------|-----------------------------------|---------------|----------------|----------------|----------------------|--------------------------------|
| 1                                                                                                 |                     | 8.93 mCi                          | 386 $\mu$ Ci  | 140 $\mu$ Ci   | 17 min         | 155.9 $\mu$ Ci       | 40.4%                          |
| 2                                                                                                 | <b>10-Br (X=Br)</b> | 11.93 mCi                         | 377 $\mu$ Ci  | 126 $\mu$ Ci   | 15 min         | 138.5 $\mu$ Ci       | 36.7%                          |
| 3                                                                                                 |                     | 8.98 mCi                          | 415 $\mu$ Ci  | 154 $\mu$ Ci   | 16 min         | 170.4 $\mu$ Ci       | 41.1%                          |
| Average RCC of <b>10-<sup>18</sup>F</b> from <b>10-Br</b> : <b>39.4<math>\pm</math>1.9%</b> (n=3) |                     |                                   |               |                |                |                      |                                |
| 4                                                                                                 | <b>10-I (X=I)</b>   | 12.52 mCi                         | 346 $\mu$ Ci  | 16 $\mu$ Ci    | 17 min         | 17.8 $\mu$ Ci        | <b>5.1%</b>                    |

|                                                                                     |                                         |           |              |              |        |                |       |
|-------------------------------------------------------------------------------------|-----------------------------------------|-----------|--------------|--------------|--------|----------------|-------|
| 5                                                                                   |                                         | 12.48 mCi | 712 $\mu$ Ci | 315 $\mu$ Ci | 17 min | 432.5 $\mu$ Ci | 49.3% |
| 6                                                                                   | 10-NO <sub>2</sub> (X=NO <sub>2</sub> ) | 11.28 mCi | 333 $\mu$ Ci | 134 $\mu$ Ci | 16 min | 148.2 $\mu$ Ci | 44.5% |
| 7                                                                                   |                                         | 16.05 mCi | 412 $\mu$ Ci | 192 $\mu$ Ci | 16 min | 212.4 $\mu$ Ci | 51.2% |
| Average RCC of 10- <sup>18</sup> F from 10- NO <sub>2</sub> : 48.3 $\pm$ 2.8% (n=3) |                                         |           |              |              |        |                |       |

**Supplementary Table 14. HPLC-isolated RCCs of 10-<sup>18</sup>F**

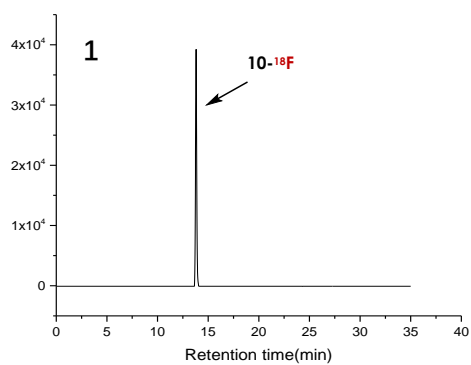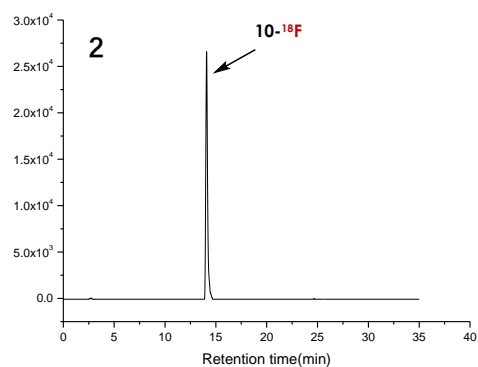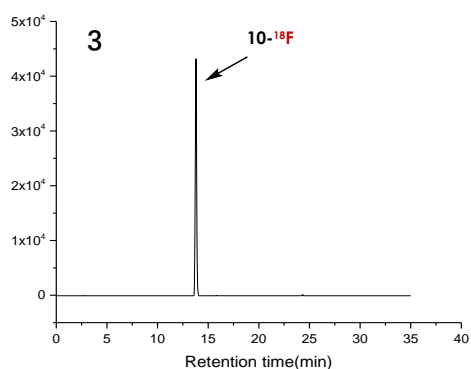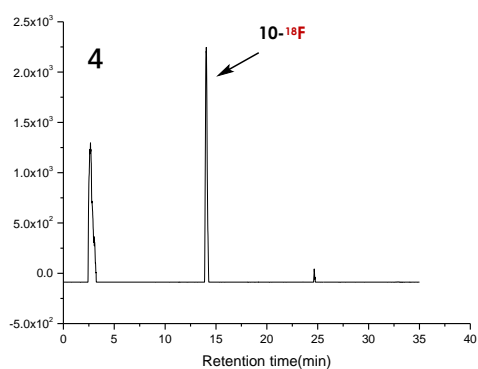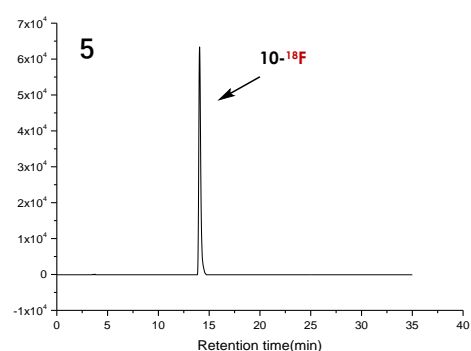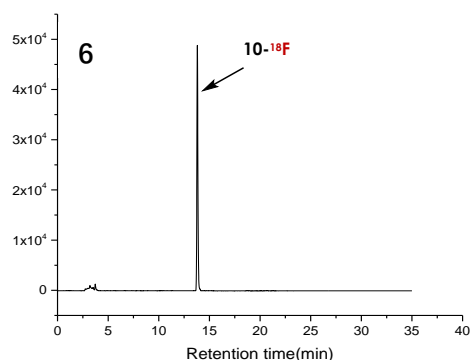

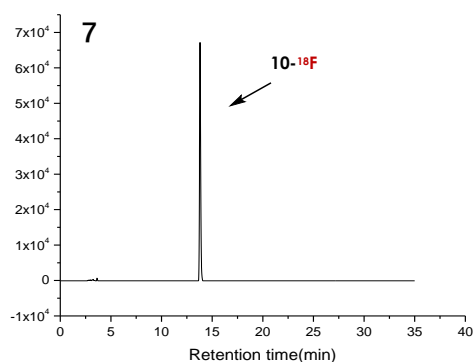

Supplementary Figure 31. Crude radio-HPLC traces from **10-Br**, **10-I**, **10-NO<sub>2</sub>** to **10-<sup>18</sup>F**

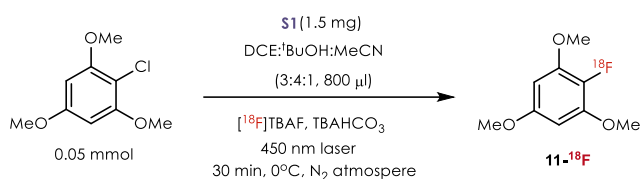

| Reaction                                           | Substrate | Activity ([ <sup>18</sup> F]TBAF) | Injected dose | Collected dose | Isolation time | Decay corrected dose | Radiochemical conversion (RCC) |
|----------------------------------------------------|-----------|-----------------------------------|---------------|----------------|----------------|----------------------|--------------------------------|
| 1                                                  | 11        | 10.66 mCi                         | 491 $\mu$ Ci  | 71 $\mu$ Ci    | 18 min         | 79.5 $\mu$ Ci        | 16.2%                          |
| 2                                                  |           | 9.53 mCi                          | 526 $\mu$ Ci  | 84 $\mu$ Ci    | 16 min         | 92.9 $\mu$ Ci        | 17.7%                          |
| 3                                                  |           | 11.79 mCi                         | 736 $\mu$ Ci  | 81 $\mu$ Ci    | 16 min         | 90.8 $\mu$ Ci        | 12.3%                          |
| Average RCC: <b>15.4<math>\pm</math>2.3%</b> (n=3) |           |                                   |               |                |                |                      |                                |

Supplementary Table 15. HPLC-isolated RCCs of **11-<sup>18</sup>F**

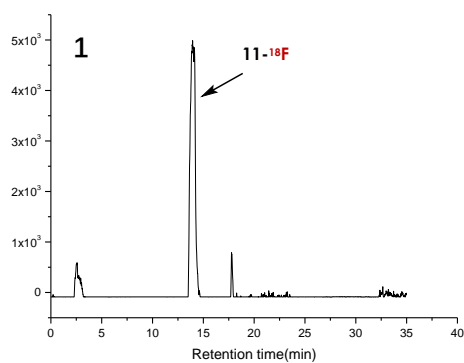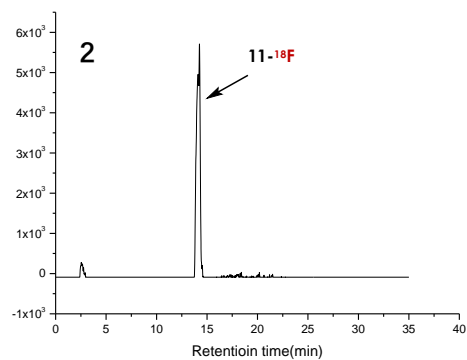

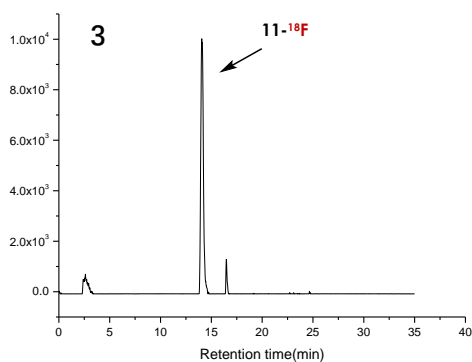

Supplementary Figure 32. Crude radio-HPLC traces from 11 to 11-<sup>18</sup>F

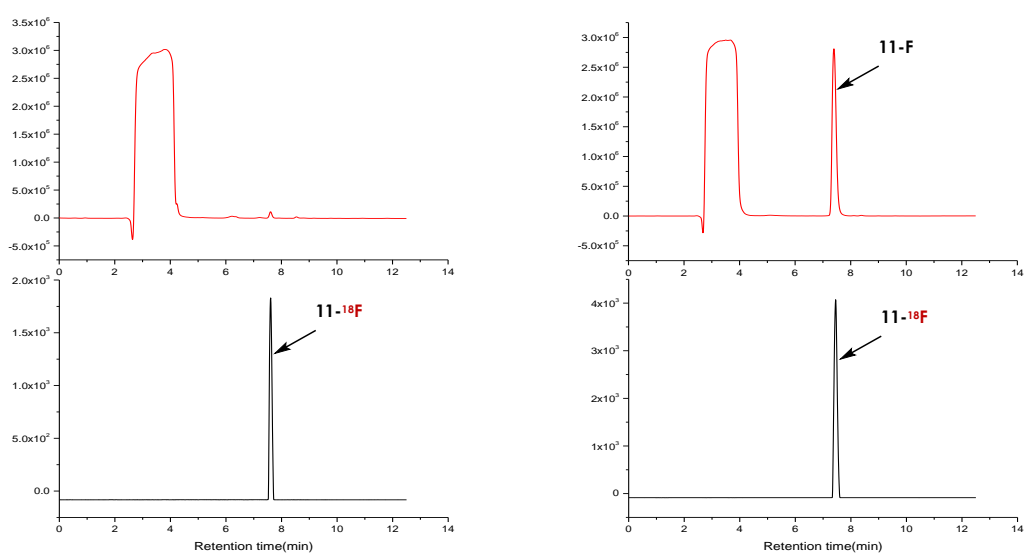

Supplementary Figure 33. Purification (left) and co-injection for 11-<sup>18</sup>F

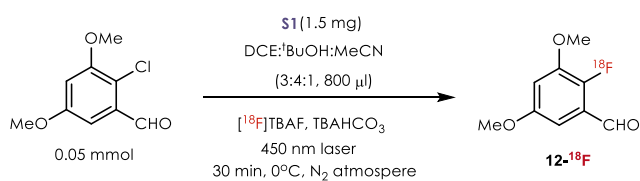

| Reaction                                           | Substrate | Activity ([ <sup>18</sup> F]TBAF) | Injected dose | Collected dose | Isolation time | Decay corrected dose | Radiochemical conversion (RCC) |
|----------------------------------------------------|-----------|-----------------------------------|---------------|----------------|----------------|----------------------|--------------------------------|
| 1                                                  |           | 9.95 mCi                          | 372 $\mu$ Ci  | 135 $\mu$ Ci   | 17 min         | 150.3 $\mu$ Ci       | 40.4%                          |
| 2                                                  | 12        | 11.22 mCi                         | 355 $\mu$ Ci  | 129 $\mu$ Ci   | 17 min         | 143.6 $\mu$ Ci       | 40.5%                          |
| 3                                                  |           | 9.64 mCi                          | 451 $\mu$ Ci  | 127 $\mu$ Ci   | 17 min         | 141.4 $\mu$ Ci       | 31.4%                          |
| Average RCC: <b>37.4<math>\pm</math>4.3%</b> (n=3) |           |                                   |               |                |                |                      |                                |

Supplementary Table 16. HPLC-isolated RCCs of 12-<sup>18</sup>F



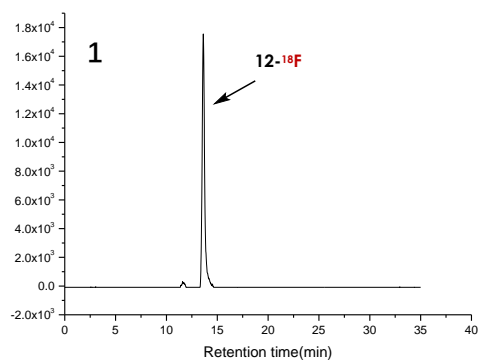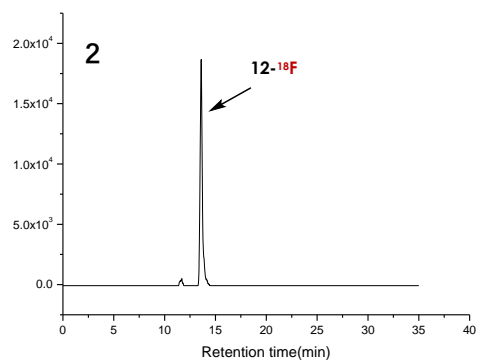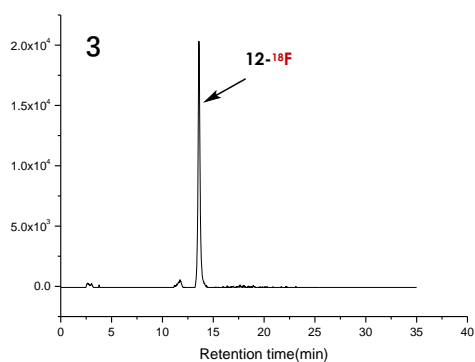

Supplementary Figure 34. Crude radio-HPLC traces from 12 to 12-<sup>18</sup>F

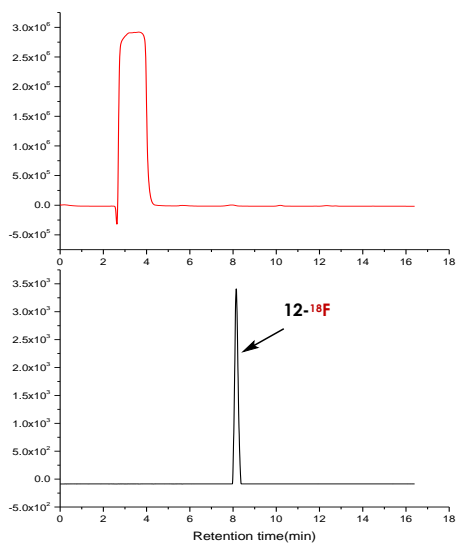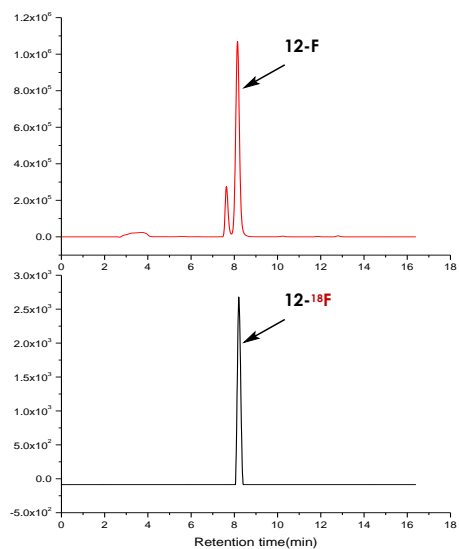

Supplementary Figure 35. Purification (left) and co-injection(right) for 12-<sup>18</sup>F

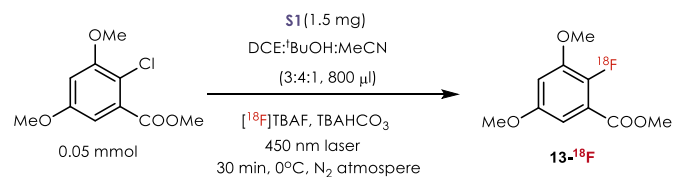

| Reaction                                           | Substrate | Activity ([ $^{18}\text{F}$ ]TBAF) | Injected dose      | Collected dose     | Isolation time | Decay corrected dose | Radiochemical conversion (RCC) |
|----------------------------------------------------|-----------|------------------------------------|--------------------|--------------------|----------------|----------------------|--------------------------------|
| 1                                                  | 13        | 12.18 mCi                          | 503 $\mu\text{Ci}$ | 328 $\mu\text{Ci}$ | 16 min         | 362.9 $\mu\text{Ci}$ | 72.1%                          |
| 2                                                  |           | 8.98 mCi                           | 800 $\mu\text{Ci}$ | 565 $\mu\text{Ci}$ | 17 min         | 629.0 $\mu\text{Ci}$ | 78.6%                          |
| 3                                                  |           | 13.71 mCi                          | 902 $\mu\text{Ci}$ | 688 $\mu\text{Ci}$ | 17 min         | 766.0 $\mu\text{Ci}$ | 84.9%                          |
| Average RCC: <b>78.5<math>\pm</math>5.2%</b> (n=3) |           |                                    |                    |                    |                |                      |                                |

**Supplementary Table 17.** HPLC-isolated RCCs of **13- $^{18}\text{F}$**

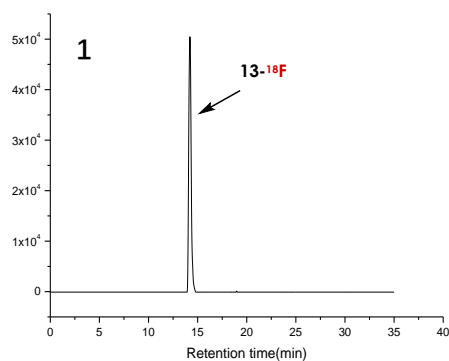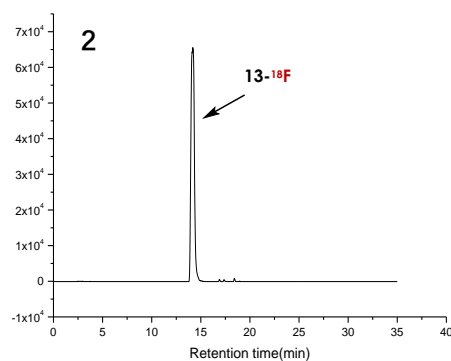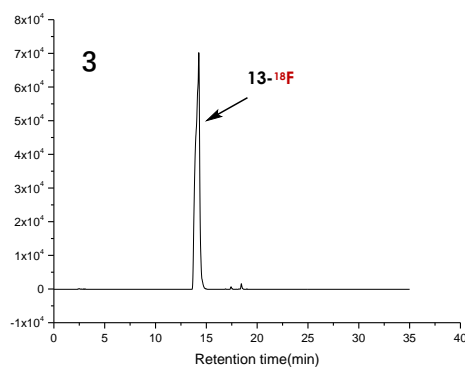

**Supplementary Figure 36.** Crude radio-HPLC traces from **13** to **13- $^{18}\text{F}$**

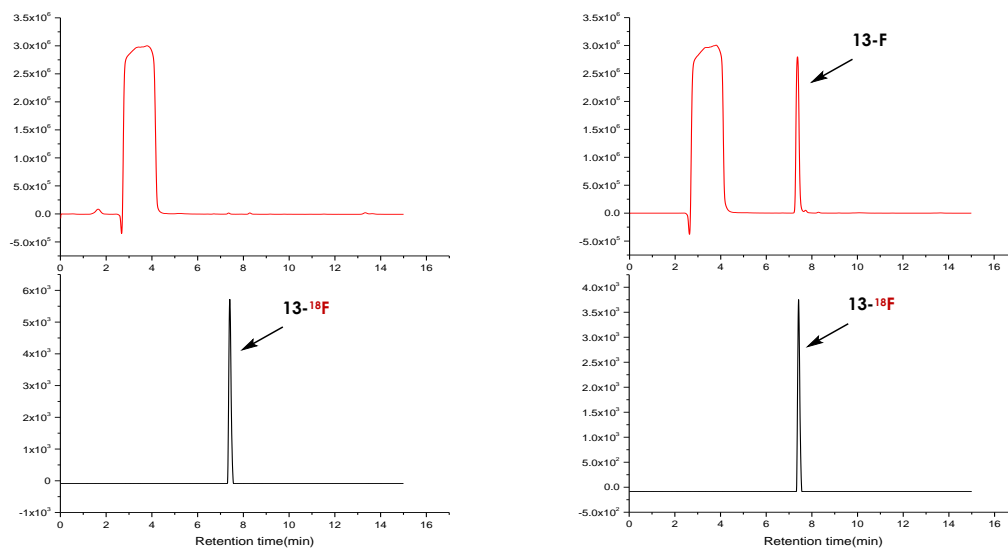

**Supplementary Figure 37.** Purification (left) and co-injection(right) for **13-<sup>18</sup>F**

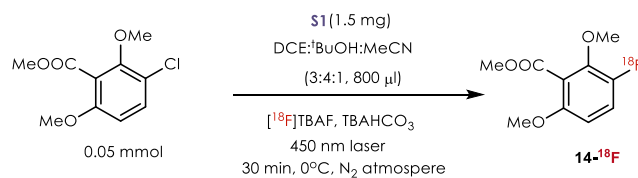

| Reaction | Substrate | Activity ([ <sup>18</sup> F]TBAF) | Injected dose | Collected dose | Isolation time | Decay corrected dose | Radiochemical conversion (RCC) |
|----------|-----------|-----------------------------------|---------------|----------------|----------------|----------------------|--------------------------------|
| 1        |           | 13.02 mCi                         | 524 $\mu$ Ci  | 214 $\mu$ Ci   | 16 min         | 236.8 $\mu$ Ci       | 45.2%                          |
| 2        | 14        | 8.35 mCi                          | 308 $\mu$ Ci  | 92 $\mu$ Ci i  | 16 min         | 101.8 $\mu$ Ci       | 33%                            |
| 3        |           | 6.68 mCi                          | 476 $\mu$ Ci  | 192 $\mu$ Ci   | 17 min         | 213.8 $\mu$ Ci       | 44.9%                          |

Average RCC: **41.0 $\pm$ 4.7%** (n=3)

**Supplementary Table 18.** HPLC-isolated RCCs of **14-<sup>18</sup>F**

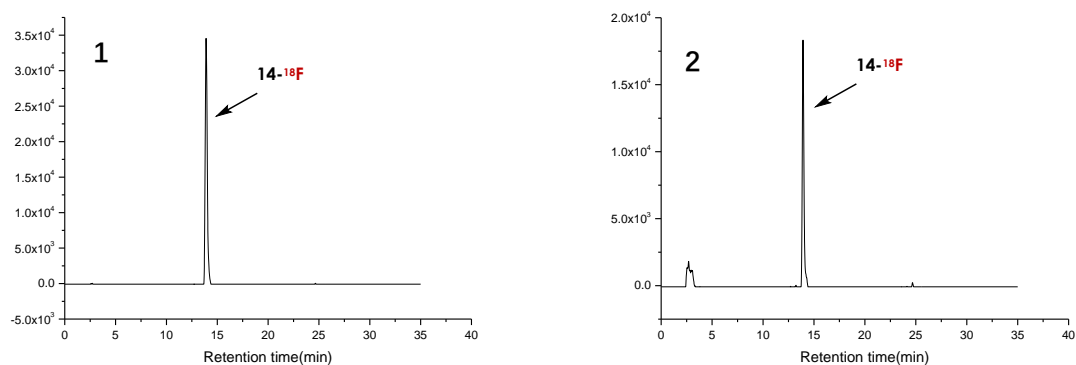

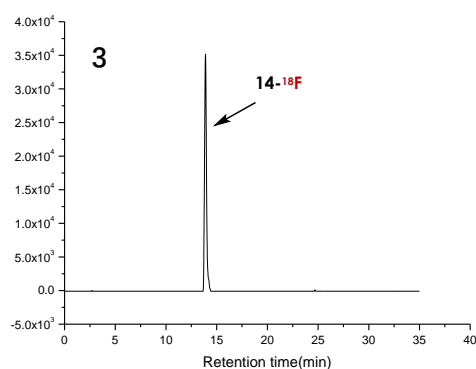

Supplementary Figure 38. Crude radio-HPLC traces from **14** to **14-<sup>18</sup>F**

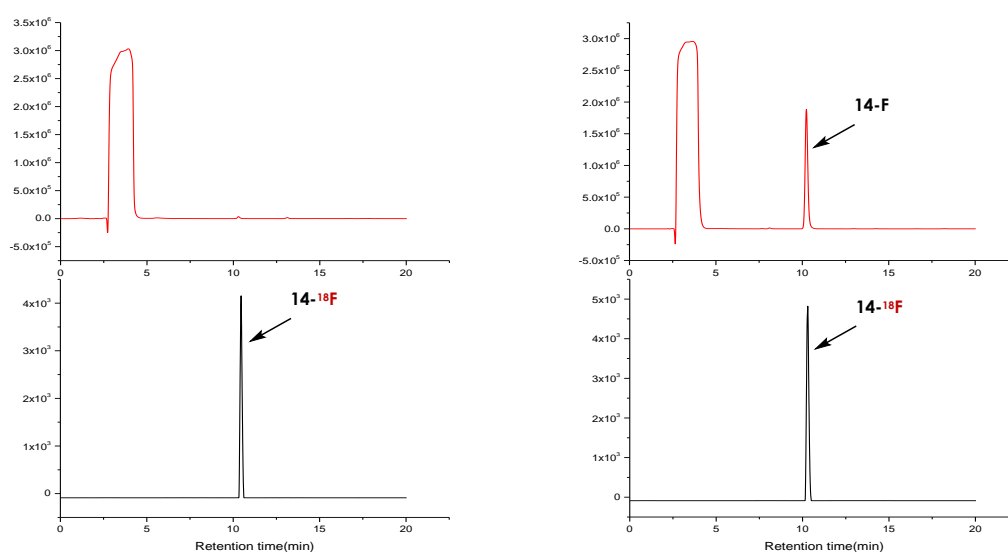

Supplementary Figure 39. Purification (left) and co-injection(right) for **14-<sup>18</sup>F**

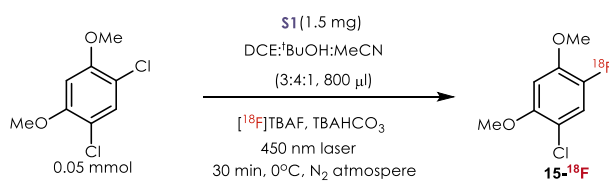

| Reaction                                           | Substrate | Activity ([ <sup>18</sup> F]TBAF) | Injected dose | Collected dose | Isolation time | Decay corrected dose | Radiochemical conversion (RCC) |
|----------------------------------------------------|-----------|-----------------------------------|---------------|----------------|----------------|----------------------|--------------------------------|
| 1                                                  |           | 9.79 mCi                          | 328 $\mu$ Ci  | 187 $\mu$ Ci   | 19 min         | 210.8 $\mu$ Ci       | 64.3%                          |
| 2                                                  | <b>15</b> | 8.91 mCi                          | 566 $\mu$ Ci  | 283 $\mu$ Ci   | 19 min         | 319.1 $\mu$ Ci       | 56.4%                          |
| 3                                                  |           | 12.10 mCi                         | 520 $\mu$ Ci  | 271 $\mu$ Ci   | 19 min         | 305.5 $\mu$ Ci       | 58.8%                          |
| Average RCC: <b>59.8<math>\pm</math>3.3%</b> (n=3) |           |                                   |               |                |                |                      |                                |

Supplementary Table 19. HPLC-isolated RCCs of **15-<sup>18</sup>F**

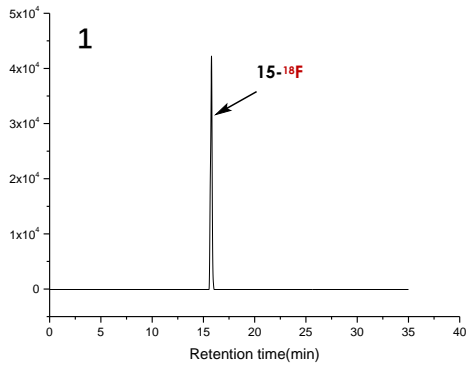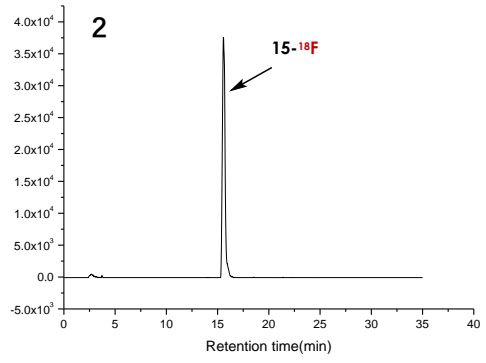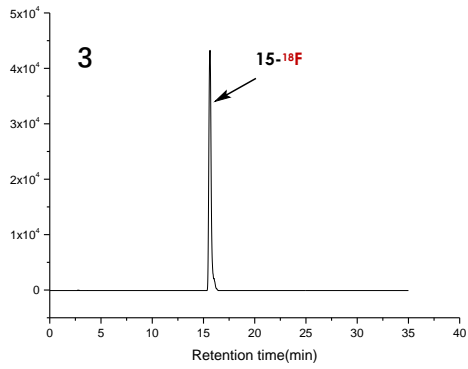

Supplementary Figure 40. Crude radio-HPLC traces from 15 to  $15\text{-}^{18}\text{F}$

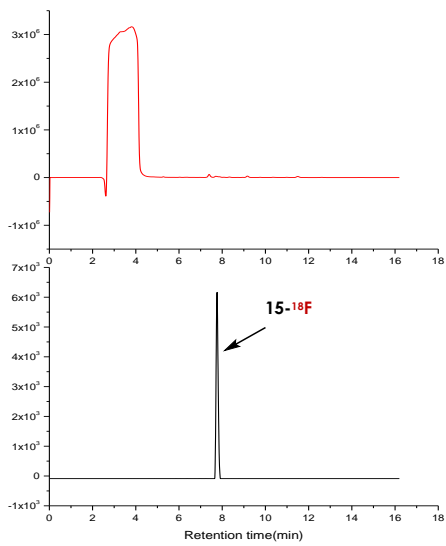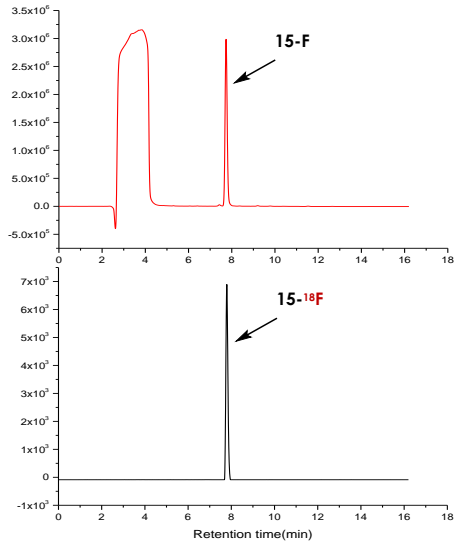

Supplementary Figure 41. Purification (left) and co-injection(right) for  $15\text{-}^{18}\text{F}$

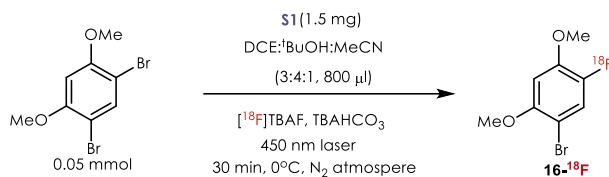

| Reaction | Substrate       | Activity ([ <sup>18</sup> F]TBAF) | Injected dose | Collected dose | Isolation time | Decay corrected dose | Radiochemical conversion (RCC) |
|----------|-----------------|-----------------------------------|---------------|----------------|----------------|----------------------|--------------------------------|
| 1        | 16 <sup>a</sup> | 10.09 mCi                         | 477 μCi       | 48 μCi         | 19 min         | 54.1 μCi             | 11.3%                          |
| 2        |                 | 11.26 mCi                         | 350 μCi       | 44 μCi         | 19 min         | 49.6 μCi             | 14.2%                          |
| 3        |                 | 9.13 mCi                          | 395 μCi       | 64 μCi         | 18 min         | 71.7 μCi             | 18.2%                          |

Average RCC: **14.6±2.8%** (n=3)

<sup>a</sup>Substrate precipitated out during the reaction.

**Supplementary Table 20.** HPLC-isolated RCCs of **16-<sup>18</sup>F**

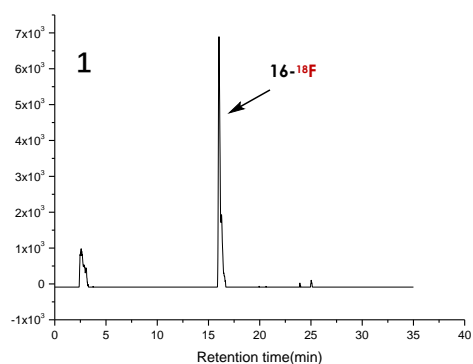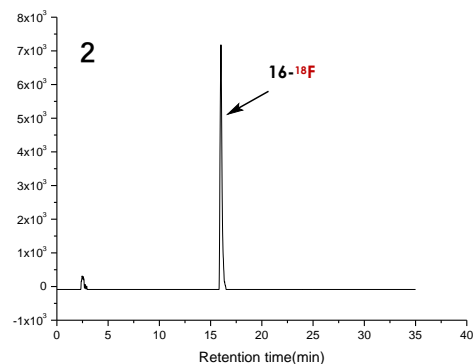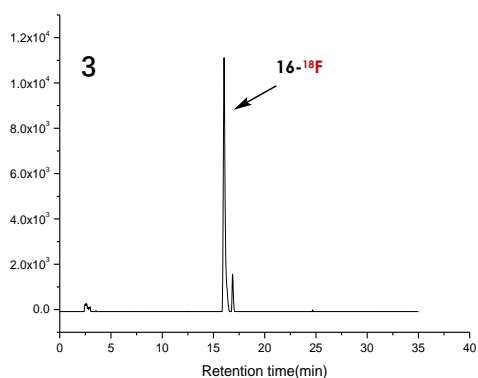

**Supplementary Figure 42.** Crude radio-HPLC traces from **16** to **16-<sup>18</sup>F**

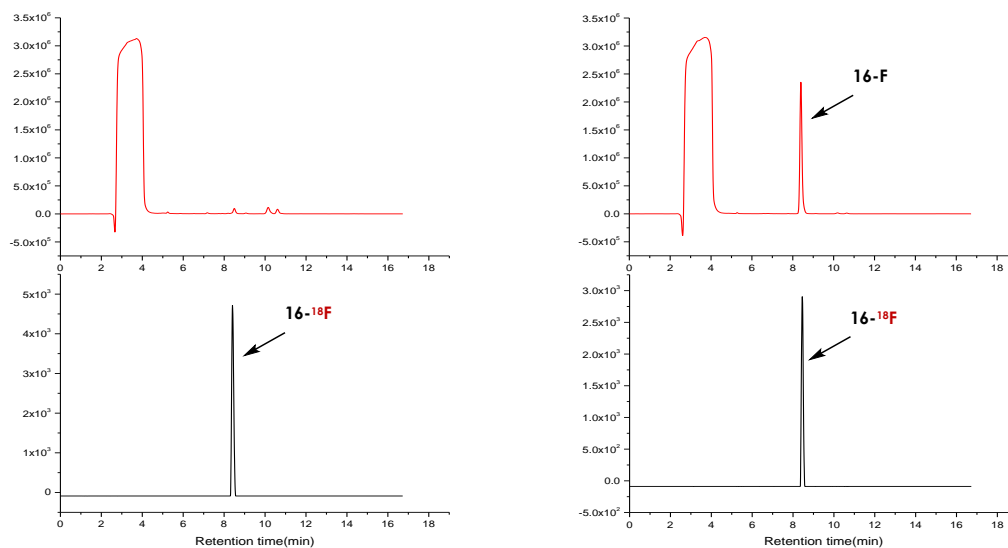

**Supplementary Figure 43.** Purification (left) and co-injection(right) for **16-<sup>18</sup>F**

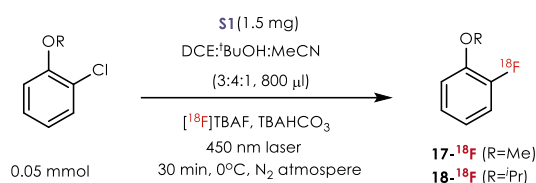

| Reaction | Substrate | Activity ([ <sup>18</sup> F]TBAF) | Injected dose | Collected dose | Isolation time | Decay corrected dose | Radiochemical conversion (RCC) |
|----------|-----------|-----------------------------------|---------------|----------------|----------------|----------------------|--------------------------------|
| 1        | 17 (R=Me) | 12.69 mCi                         | 533 μCi       | ---            | ---            | ---                  | trace                          |
| 2        | 18 (R=Pr) | 9.39 mCi                          | 519 μCi       | 33 μCi         | 19 min         | 37.2 μCi             | 7.2%                           |

**Supplementary Table 21.** HPLC-isolated RCCs of **17-<sup>18</sup>F**, **18-<sup>18</sup>F**

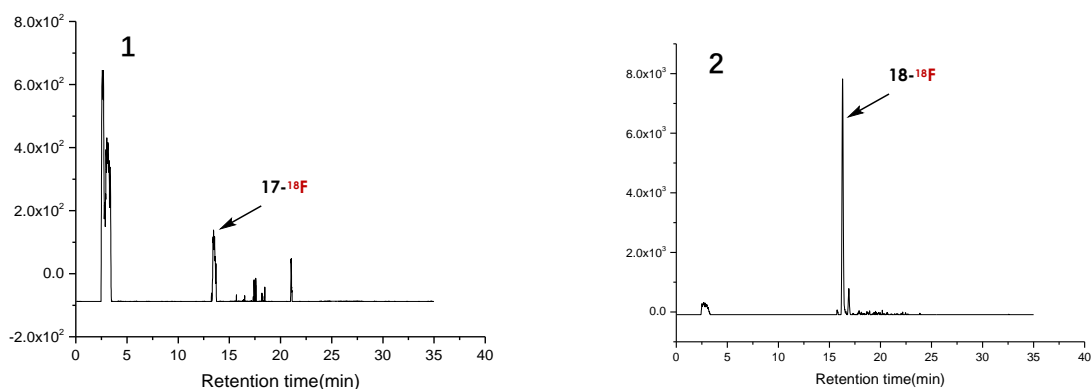

**Supplementary Figure 44.** Crude radio-HPLC traces from **17,18** to **17-<sup>18</sup>F**, **18-<sup>18</sup>F**.

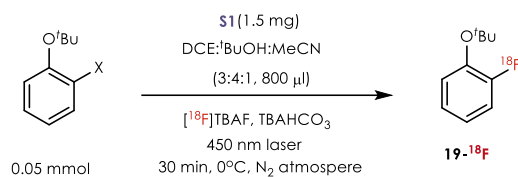

| Reaction                                                      | Substrate                                   | Activity ([ <sup>18</sup> F]TBAF) | Injected dose | Collected dose | Isolation time | Decay corrected dose | Radiochemical conversion (RCC) |
|---------------------------------------------------------------|---------------------------------------------|-----------------------------------|---------------|----------------|----------------|----------------------|--------------------------------|
| 1                                                             | 19-Cl                                       | 9.21 mCi                          | 729 μCi       | 68 μCi         | 19 min         | 77.2 μCi             | 10.5%                          |
| 2                                                             |                                             | 9.40 mCi                          | 837 μCi       | 53 μCi         | 20 min         | 60.1 μCi             | 7.2%                           |
| 3                                                             |                                             | 9.83 mCi                          | 451 μCi       | 37 μCi         | 19 min         | 41.7 μCi             | 9.2%                           |
| Average RCC of 19- <sup>18</sup> F from 19-Cl: 9.0±1.4% (n=3) |                                             |                                   |               |                |                |                      |                                |
| 4                                                             | 19-F <sup>a</sup> (X=F, R= <sup>t</sup> Bu) | 15.13 mCi                         | 624 μCi       | 183 μCi        | 20 min         | 207.6 μCi            | 33.3%                          |
| 5                                                             |                                             | 11.71 mCi                         | 726 μCi       | 237 μCi        | 19 min         | 267.2 μCi            | 36.8%                          |
| 6                                                             |                                             | 9.45 mCi                          | 285 μCi       | 71 μCi         | 19 min         | 80.1 μCi             | 28.1%                          |
| Average RCC of 19- <sup>18</sup> F from 19-F: 32.7±3.6% (n=3) |                                             |                                   |               |                |                |                      |                                |

**Supplementary Table 22.** HPLC-isolated RCCs of 19-<sup>18</sup>F

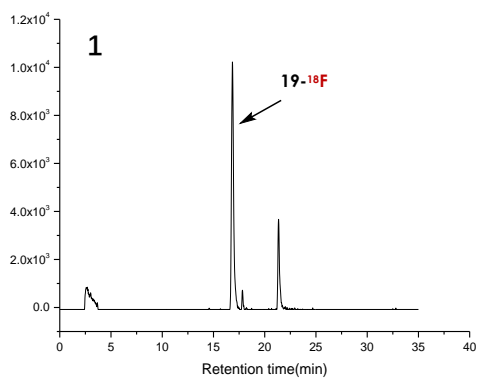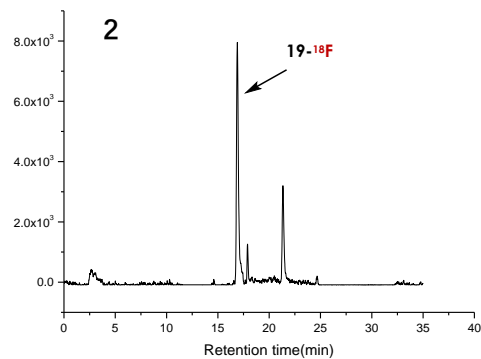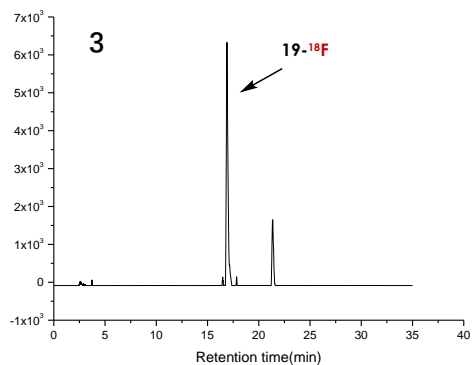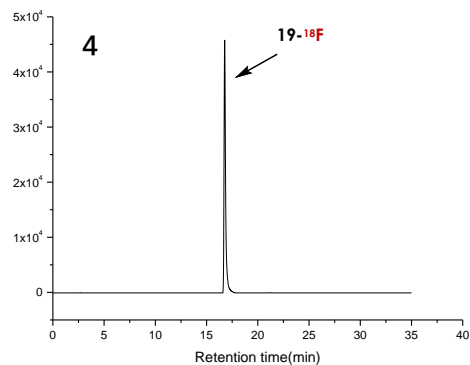



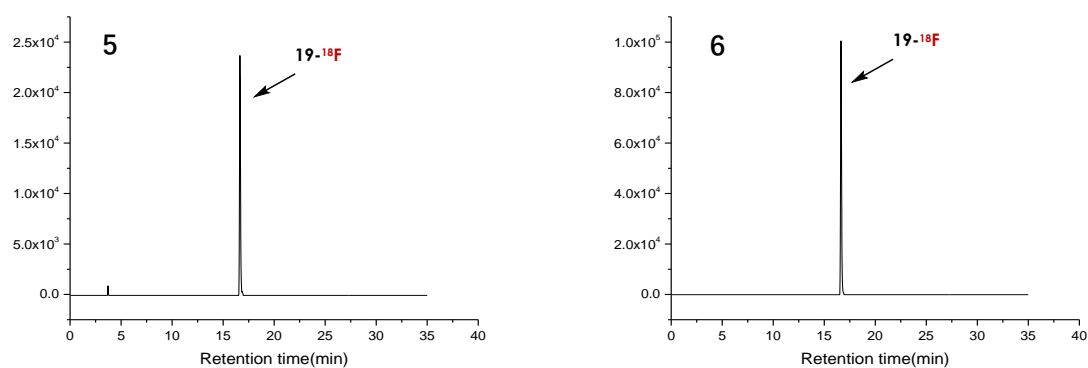

Supplementary Figure 45. Crude radio-HPLC traces from **19-Cl** to **19-<sup>18</sup>F**

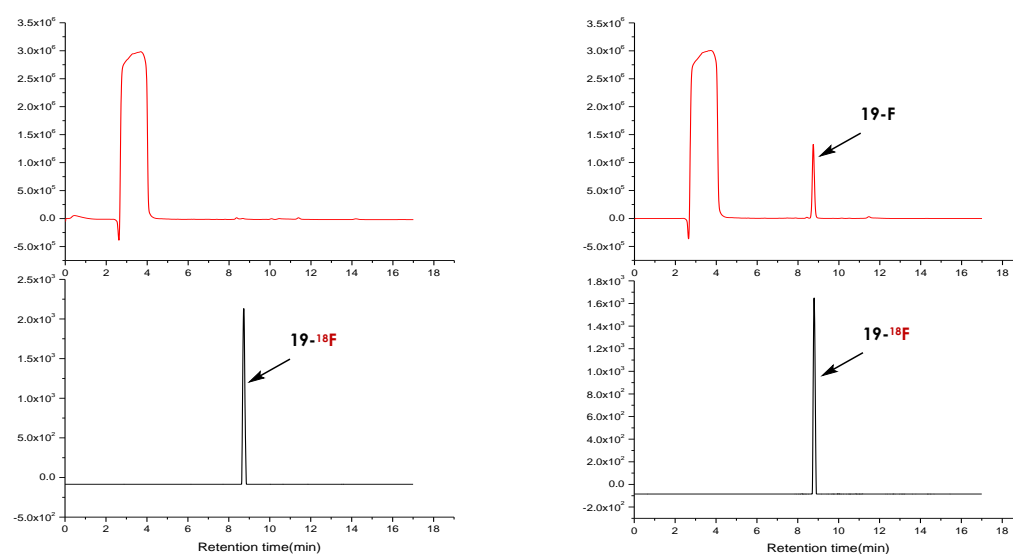

Supplementary Figure 46. Purification (left) and co-injection(right) for **19-<sup>18</sup>F**

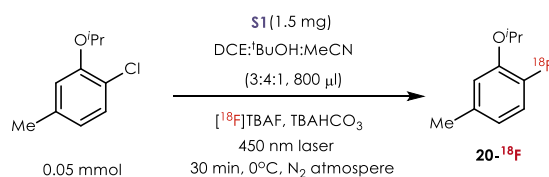

| Reaction                                           | Substrate | Activity ([ <sup>18</sup> F]TBAF) | Injected dose | Collected dose | Isolation time | Decay corrected dose | Radiochemical conversion (RCC) |
|----------------------------------------------------|-----------|-----------------------------------|---------------|----------------|----------------|----------------------|--------------------------------|
| 1                                                  |           | 9.55 mCi                          | 437 $\mu$ Ci  | 119 $\mu$ Ci   | 20 min         | 135 $\mu$ Ci         | 30.9%                          |
| 2                                                  | <b>20</b> | 10.96 mCi                         | 459 $\mu$ Ci  | 110 $\mu$ Ci   | 21 min         | 125.6 $\mu$ Ci       | 27.4%                          |
| 3                                                  |           | 8.89 mCi                          | 609 $\mu$ Ci  | 159 $\mu$ Ci   | 21 min         | 181.5 $\mu$ Ci       | 29.8%                          |
| Average RCC: <b>29.4<math>\pm</math>1.5%</b> (n=3) |           |                                   |               |                |                |                      |                                |

Supplementary Table 23. HPLC-isolated RCCs of **20-<sup>18</sup>F**

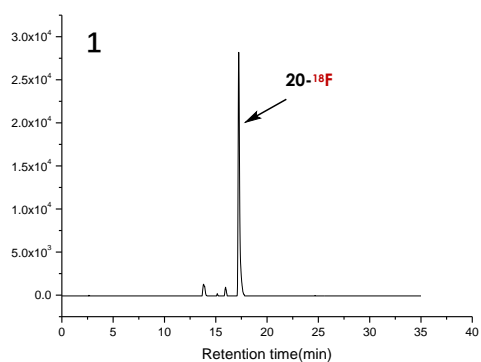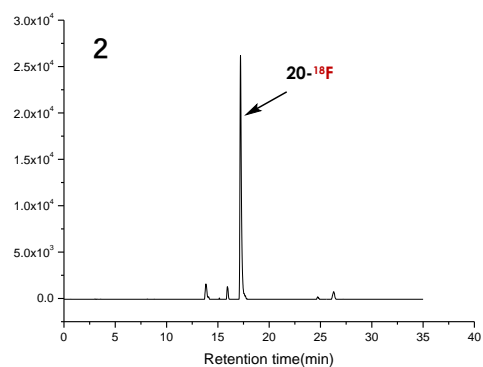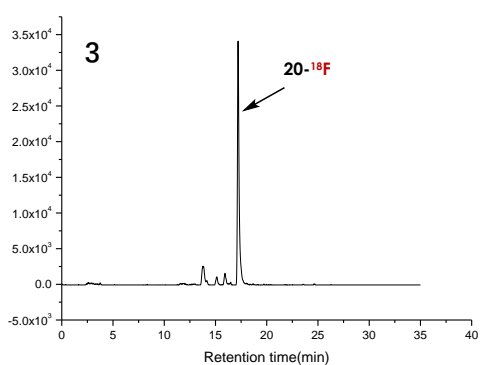

Supplementary Figure 47. Crude radio-HPLC traces from **20** to  $20\text{-}^{18}\text{F}$

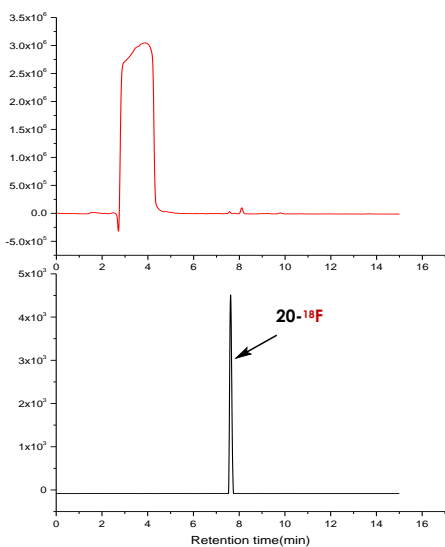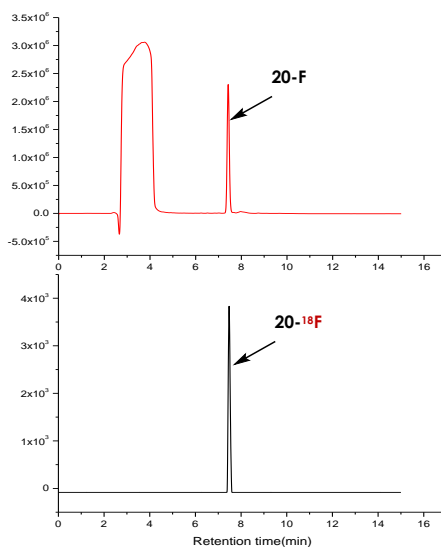

Supplementary Figure 48. Purification (left) and co-injection for  $20\text{-}^{18}\text{F}$

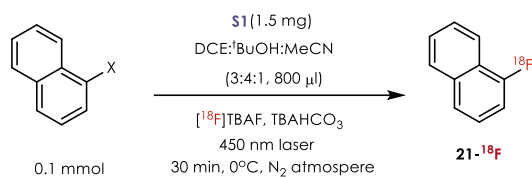

| Reaction                                                       | Substrate               | Activity ([ <sup>18</sup> F]TBAF) | Injected dose | Collected dose | Isolation time | Decay corrected dose | Radiochemical conversion (RCC) |
|----------------------------------------------------------------|-------------------------|-----------------------------------|---------------|----------------|----------------|----------------------|--------------------------------|
| 1                                                              |                         | 12.59 mCi                         | 541 μCi       | 72 μCi         | 20 min         | 81.7 μCi             | 15.1%                          |
| 2                                                              | 21-Cl (X=Cl)            | 12.06 mCi                         | 415 μCi       | 43 μCi         | 20 min         | 48.8 μCi             | 11.8%                          |
| 3                                                              |                         | 10.86 mCi                         | 355 μCi       | 35 μCi         | 19 min         | 39.5 μCi             | 11.1%                          |
| Average RCC of 21- <sup>18</sup> F from 21-Cl: 12.7±1.7% (n=3) |                         |                                   |               |                |                |                      |                                |
| 4                                                              |                         | 5.23 mCi                          | 300 μCi       | 150 μCi        | 20 min         | 170.2 μCi            | 56.7%                          |
| 5                                                              | 21-F <sup>d</sup> (X=F) | 6.67 mCi                          | 329 μCi       | 138 μCi        | 20 min         | 156.6 μCi            | 47.6%                          |
| 6                                                              |                         | 10.79 mCi                         | 338 μCi       | 151 μCi        | 20 min         | 171.3 μCi            | 50.7%                          |
| Average RCC of 21- <sup>18</sup> F from 21-F: 51.7±3.8% (n=3)  |                         |                                   |               |                |                |                      |                                |

≈0.02 mmol substrate.

#### Supplementary Table 24. HPLC-isolated RCCs of 21-<sup>18</sup>F

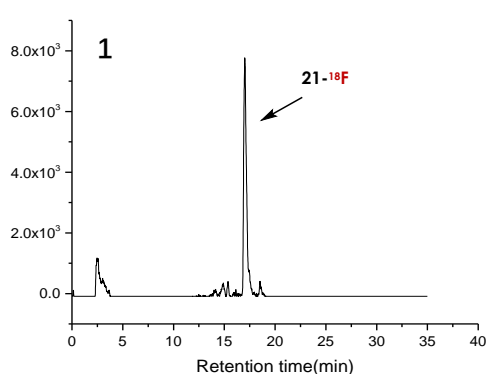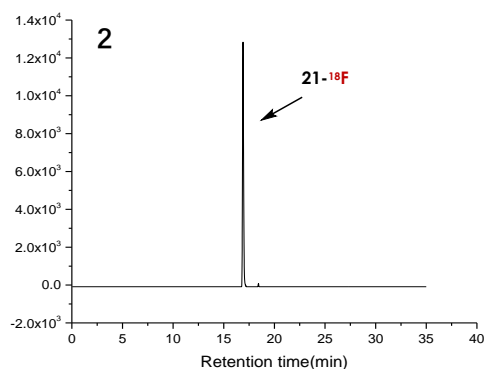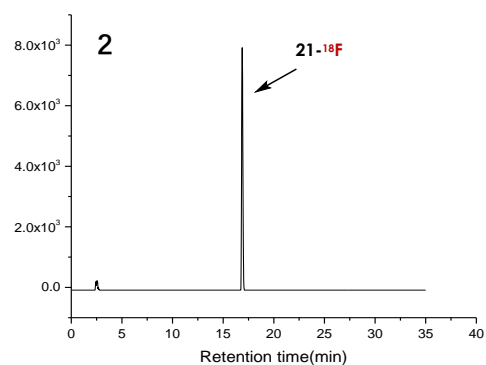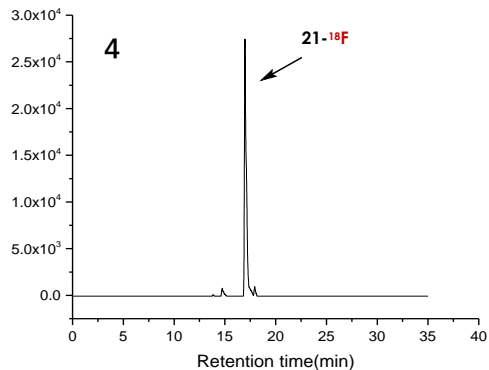

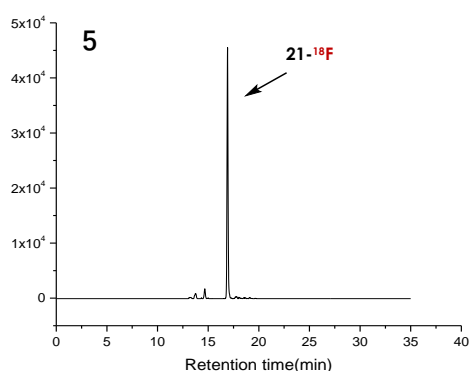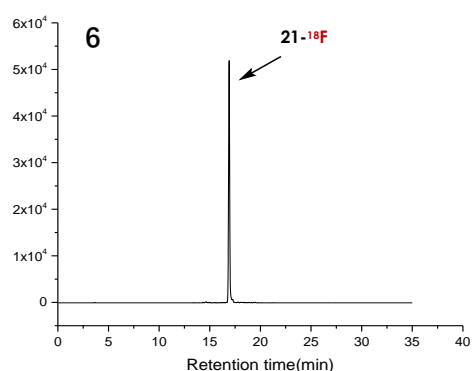

Supplementary Figure 49. Crude radio-HPLC traces from **21-Cl** and **21-F** to **21-<sup>18</sup>F**

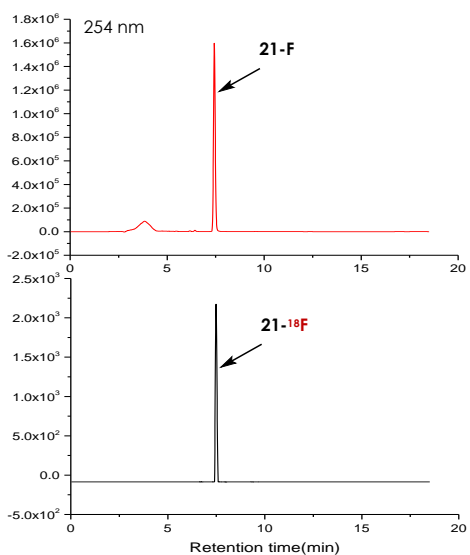

Supplementary Figure 50. Purification of **21-<sup>18</sup>F**

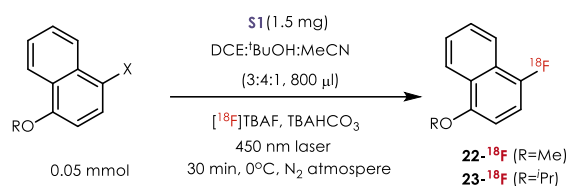

| Reaction | Substrate       | Activity ([ <sup>18</sup> F]TBAF) | Injected dose | Collected dose | Isolation time | Decay corrected dose | Radiochemical conversion (RCC) |
|----------|-----------------|-----------------------------------|---------------|----------------|----------------|----------------------|--------------------------------|
| 1        | <b>22(R=Me)</b> | 12.07 mCi                         | 321 μCi       | 13 μCi         | 21 min         | 37.2 μCi             | 4.6%                           |
| 2        |                 | 13.69 mCi                         | 374 μCi       | 51 μCi         | 22 min         | 58.6 μCi             | 15.7%                          |
| 3        | <b>23(R=Pr)</b> | 11.28 mCi                         | 307 μCi       | 34 μCi         | 22 min         | 39.1 μCi             | 12.7%                          |
| 4        |                 | 10.20 mCi                         | 439 μCi       | 47 μCi         | 22 min         | 54.0 μCi             | 12.3%                          |

Average RCC ( $^{23}\text{-}^{18}\text{F}$ ):  $13.6 \pm 1.5\%$  (n=3)

Supplementary Table 25. HPLC-isolated RCCs of  $^{22}\text{-}^{18}\text{F}$  and  $^{23}\text{-}^{18}\text{F}$

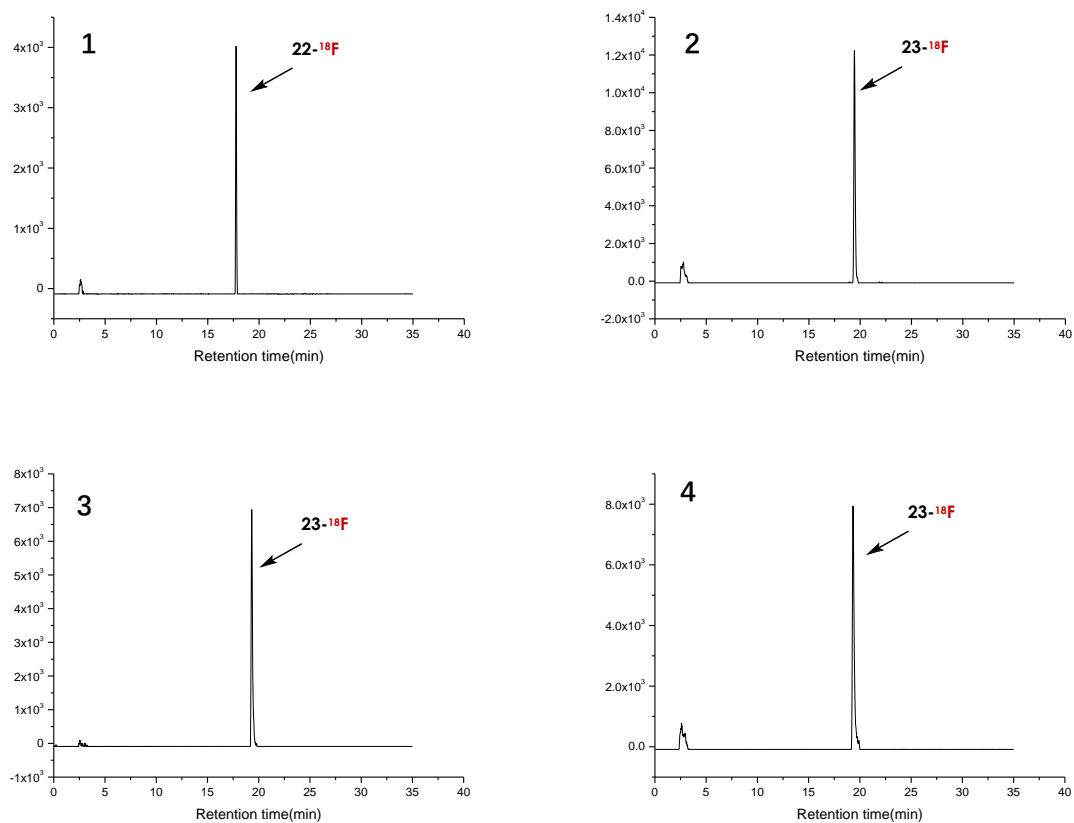

Supplementary Figure 51. Crude radio-HPLC traces from  $^{22}$  and  $^{23}$  to  $^{22}\text{-}^{18}\text{F}$  and  $^{23}\text{-}^{18}\text{F}$

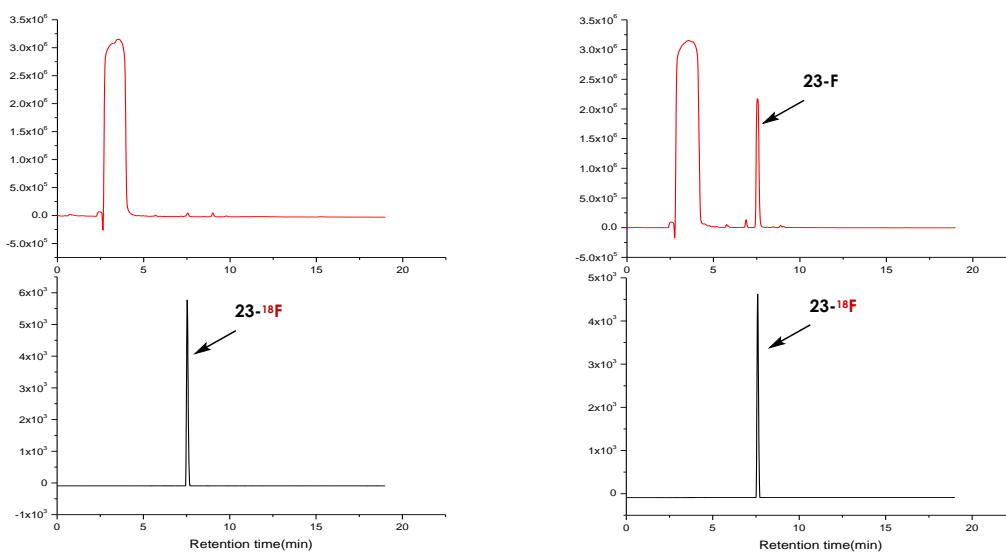

Supplementary Figure 52. Purification (left) and co-injection(right) for  $^{23}\text{-}^{18}\text{F}$

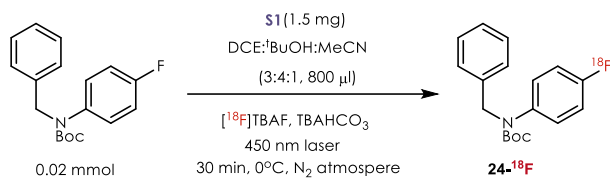

| Reaction | Substrate   | Activity ([ <sup>18</sup> F]TBAF) | Injected dose | Collected dose | Isolation time | Decay corrected dose | Radiochemical conversion (RCC) |
|----------|-------------|-----------------------------------|---------------|----------------|----------------|----------------------|--------------------------------|
| 1        | <b>24-F</b> | 9.33 mCi                          | 725 $\mu$ Ci  | 87 $\mu$ Ci    | 21 min         | 99.3 $\mu$ Ci        | 13.2%                          |
| 2        |             | 12.11 mCi                         | 362 $\mu$ Ci  | 44 $\mu$ Ci    | 20 min         | 49.9 $\mu$ Ci        | 13.8 %                         |
| 3        |             | 12.26 mCi                         | 492 $\mu$ Ci  | 101 $\mu$ Ci   | 20 min         | 114.6 $\mu$ Ci       | 23.3%                          |

Average RCC: **16.8 $\pm$ 4.6%** (n=3)

**Supplementary Table 26.** HPLC-isolated RCCs of **24-<sup>18</sup>F**

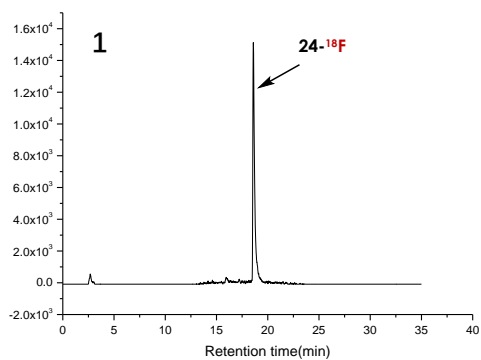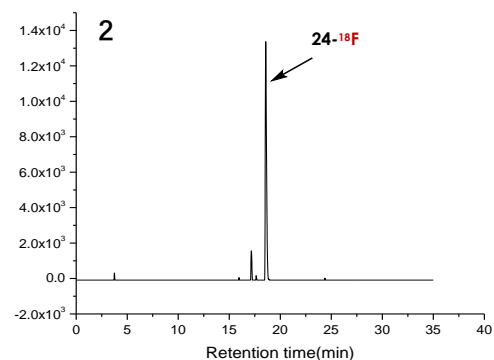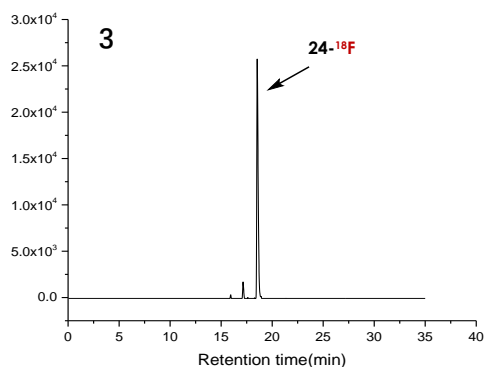

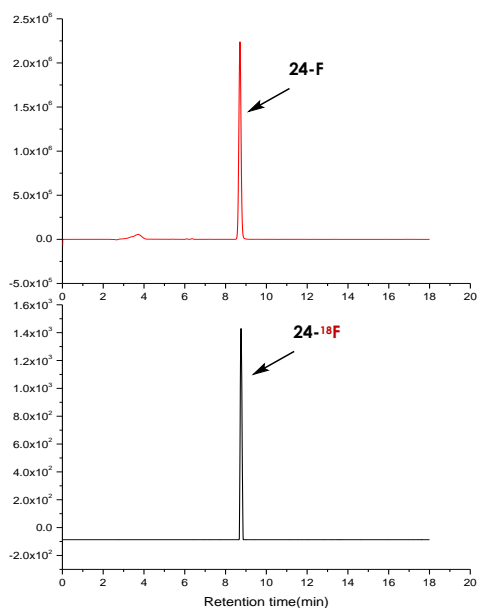

**Supplementary Figure 53.** Crude radio-HPLC traces and purification of **24-<sup>18</sup>F**

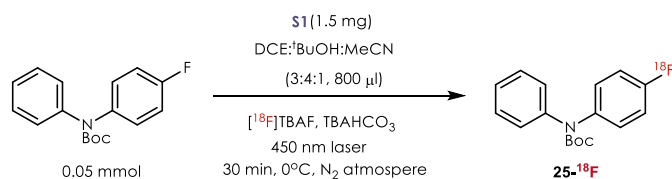

| Reaction                                                                             | Substrate           | Activity<br>([ <sup>18</sup> F]TBAF) | Injected<br>dose | Collected<br>dose | Isolation<br>time | Decay<br>corrected<br>dose | Radiochemical<br>conversion<br>(RCC) |
|--------------------------------------------------------------------------------------|---------------------|--------------------------------------|------------------|-------------------|-------------------|----------------------------|--------------------------------------|
| 1 <sup>a</sup>                                                                       | <b>25-F (X-F)</b>   | 16.00 mCi                            | 920 $\mu$ Ci     | 425 $\mu$ Ci      | 21 min            | 485.3 $\mu$ Ci             | 52.7%                                |
| 2 <sup>a</sup>                                                                       |                     | 6.59 mCi                             | 396 $\mu$ Ci     | 259 $\mu$ Ci      | 21 min            | 295.7 $\mu$ Ci             | 74.7%                                |
| 3 <sup>a</sup>                                                                       |                     | 5.94 mCi                             | 314 $\mu$ Ci     | 162 $\mu$ Ci      | 21 min            | 185.0 $\mu$ Ci             | 58.9%                                |
| 4                                                                                    |                     | 11.21 mCi                            | 749 $\mu$ Ci     | 491 $\mu$ Ci      | 23 min            | 567.7 $\mu$ Ci             | 75.8%                                |
| Average RCC of 25- <sup>18</sup> F from 25-F: <b>62.1<math>\pm</math>9.2%</b> (n=3)  |                     |                                      |                  |                   |                   |                            |                                      |
| 5                                                                                    | <b>25-Cl (X-Cl)</b> | 8.75 mCi                             | 641 $\mu$ Ci     | 74 $\mu$ Ci       | 21 min            | 84.5 $\mu$ Ci              | 13.2%                                |
| 6                                                                                    |                     | 12.55 mCi                            | 976 $\mu$ Ci     | 77 $\mu$ Ci       | 21 min            | 87.9 $\mu$ Ci              | 9.0%                                 |
| 7                                                                                    |                     | 16.47 mCi                            | 733 $\mu$ Ci     | 69 $\mu$ Ci       | 22 min            | 79.3 $\mu$ Ci              | 10.8%                                |
| Average RCC of 25- <sup>18</sup> F from 25-Cl: <b>11.0<math>\pm</math>1.7%</b> (n=3) |                     |                                      |                  |                   |                   |                            |                                      |

<sup>a</sup>0.01 mmol substrate.

**Supplementary Table 27.** HPLC-isolated RCCs of **25-<sup>18</sup>F**

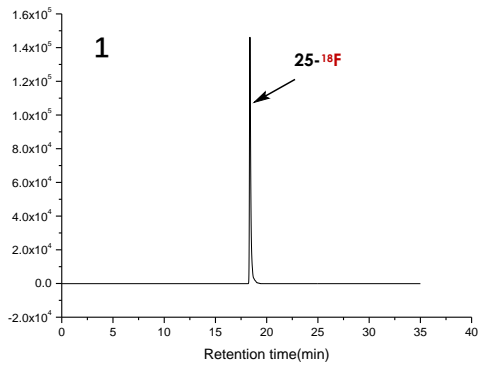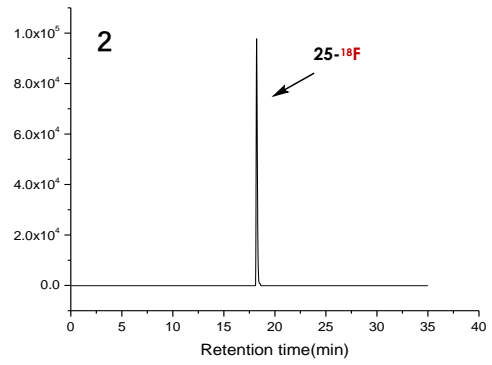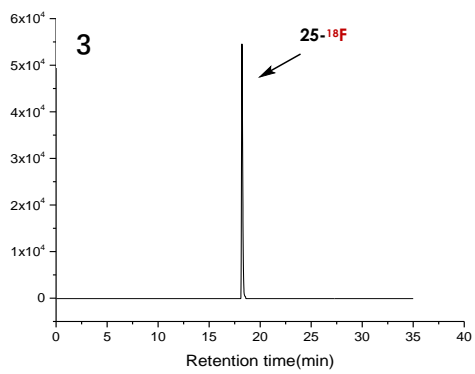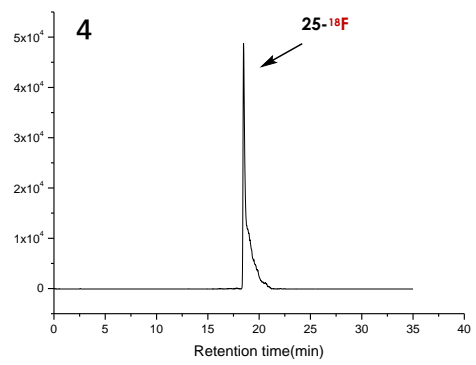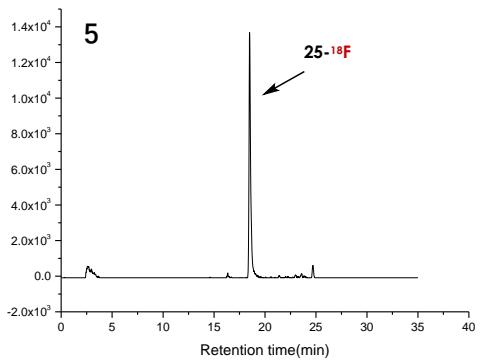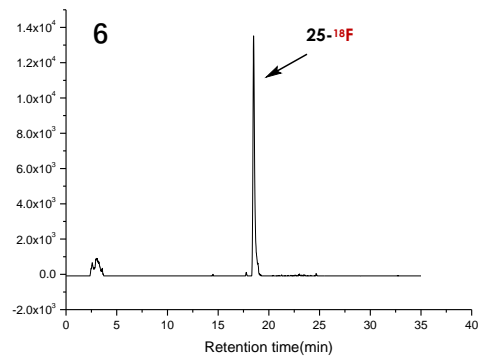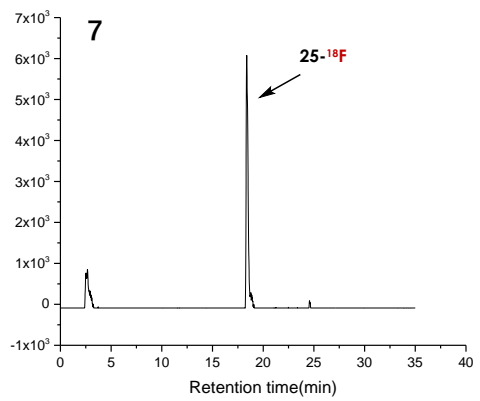



**Supplementary Figure 54.** Crude radio-HPLC traces from **25-Cl** and **25-F** to **25-<sup>18</sup>F**

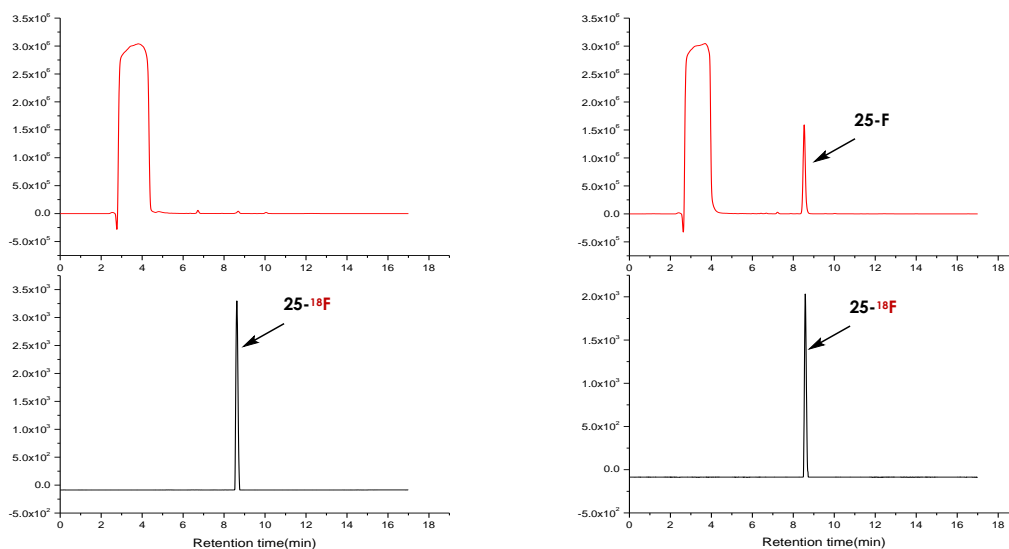

**Supplementary Figure 55.** Purification (left) and co-injection (right) for **25-<sup>18</sup>F**

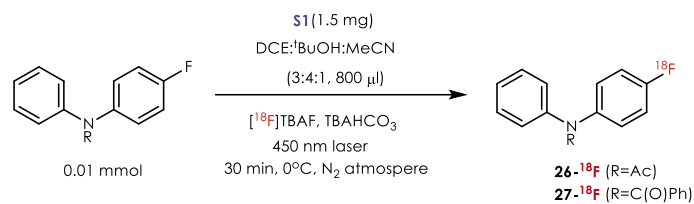

| Reaction                                                          | Substrate          | Activity ([ <sup>18</sup> F]TBAF) | Injected dose | Collected dose | Isolation time | Decay corrected dose | Radiochemical conversion (RCC) |
|-------------------------------------------------------------------|--------------------|-----------------------------------|---------------|----------------|----------------|----------------------|--------------------------------|
| 1                                                                 |                    | 8.59 mCi                          | 492 μCi       | 178 μCi        | 17 min         | 198.2 μCi            | 40.3%                          |
| 2                                                                 | <b>26</b> (R=Ac)   | 10.61 mCi                         | 427 μCi       | 164 μCi        | 16 min         | 181.4 μCi            | 42.5%                          |
| 3                                                                 |                    | 7.67 mCi                          | 308 μCi       | 90 μCi         | 16 min         | 99.6 μCi             | 32.3%                          |
| Average RCC of <b>26-<sup>18</sup>F</b> : <b>38.4%±4.4%</b> (n=3) |                    |                                   |               |                |                |                      |                                |
| 4                                                                 | <b>27</b> (R=COPh) | 16.61 mCi                         | 750 μCi       | 217 μCi        | 20 min         | 246.2 μCi            | 32.8%                          |
| 5                                                                 |                    | 17.46 mCi                         | 523 μCi       | 104 μCi        | 21 min         | 118.7 μCi            | 22.7%                          |
| 6                                                                 |                    | 11.55 mCi                         | 396 μCi       | 147 μCi        | 19 min         | 165.7 μCi            | 41.8%                          |
| Average RCC of <b>27-<sup>18</sup>F</b> : <b>32.4%±7.8%</b> (n=3) |                    |                                   |               |                |                |                      |                                |

**Supplementary Table 28.** HPLC-isolated RCCs of **26-<sup>18</sup>F** and **27-<sup>18</sup>F**

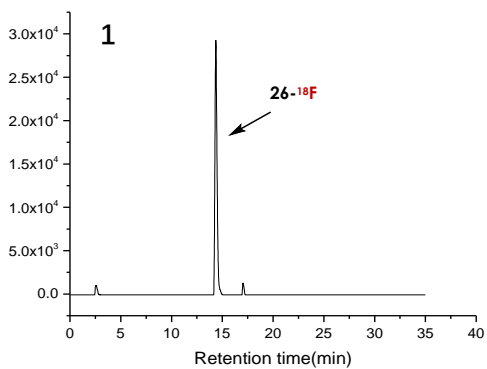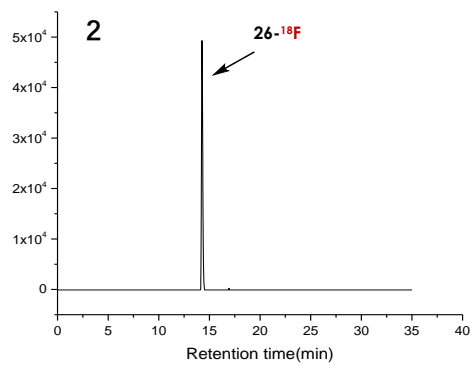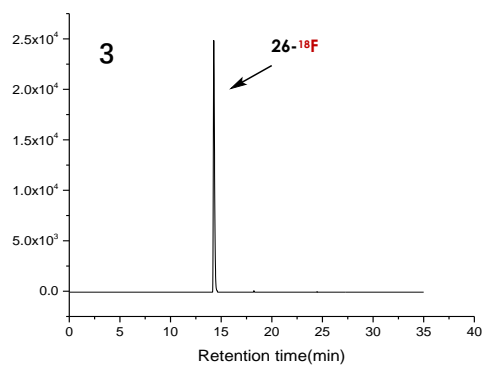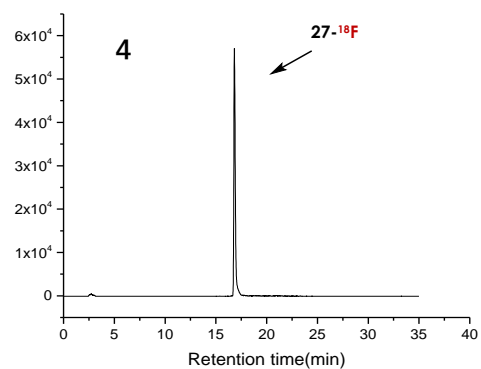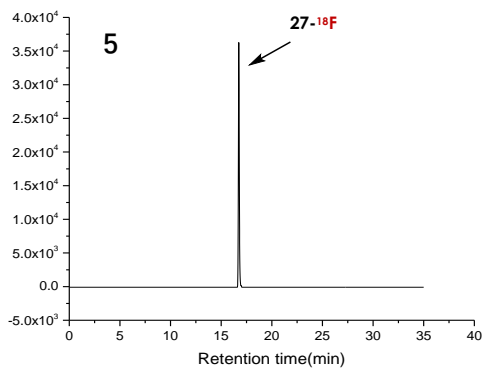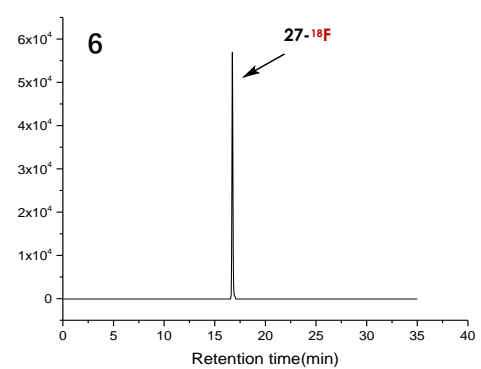

**Supplementary Figure 56.** Crude radio-HPLC traces for **26-<sup>18</sup>F** and **27-<sup>18</sup>F**

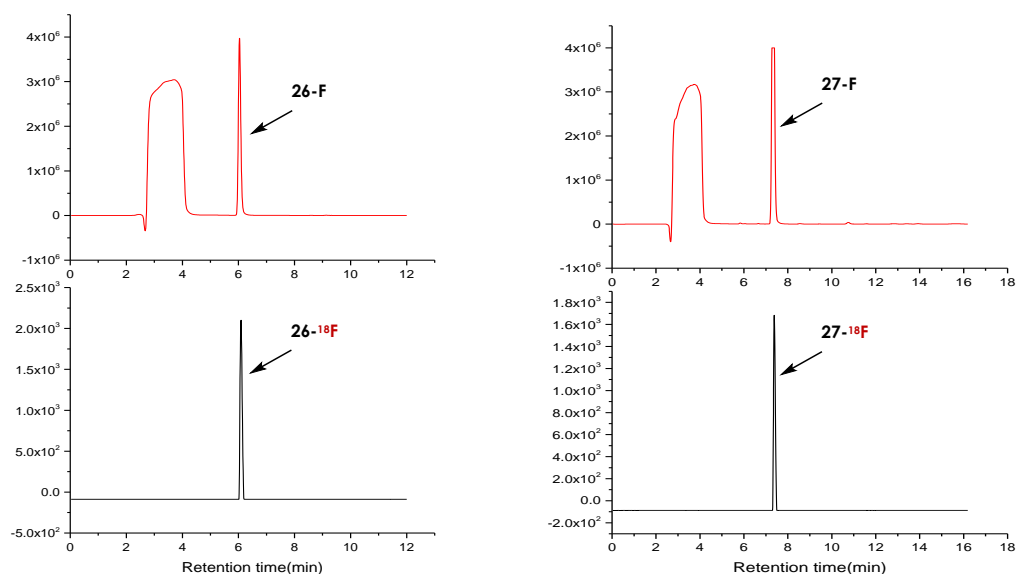

Supplementary Figure 57. HPLC traces of purification of **26-<sup>18</sup>F** and **27-<sup>18</sup>F**

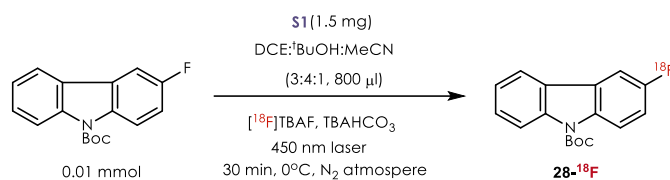

| Reaction                                                                                          | Substrate                     | Activity ([ <sup>18</sup> F]TBAF) | Injected dose | Collected dose | Isolation time | Decay corrected dose | Radiochemical conversion (RCC) |
|---------------------------------------------------------------------------------------------------|-------------------------------|-----------------------------------|---------------|----------------|----------------|----------------------|--------------------------------|
| 1                                                                                                 |                               | 15.18 mCi                         | 558 $\mu$ Ci  | 205 $\mu$ Ci   | 25 min         | 240.1 $\mu$ Ci       | 43.0%                          |
| 2                                                                                                 | <b>28-F<sup>a</sup></b> (X=F) | 8.98 mCi                          | 535 $\mu$ Ci  | 224 $\mu$ Ci   | 24 min         | 260.7 $\mu$ Ci       | 48.7%                          |
| 3                                                                                                 |                               | 7.03 mCi                          | 472 $\mu$ Ci  | 238 $\mu$ Ci   | 23 min         | 275.2 $\mu$ Ci       | 58.3%                          |
| Average RCC of <b>28-<sup>18</sup>F</b> from <b>28-F</b> : <b>50.0%<math>\pm</math>6.3%</b> (n=3) |                               |                                   |               |                |                |                      |                                |
| 4                                                                                                 |                               | 9.88 mCi                          | 602 $\mu$ Ci  | 54 $\mu$ Ci    | 25 min         | 63.2 $\mu$ Ci        | 10.5%                          |
| 5                                                                                                 | <b>28-Cl</b> (X=Cl)           | 10.68 mCi                         | 499 $\mu$ Ci  | 39 $\mu$ Ci    | 25 min         | 45.7 $\mu$ Ci        | 9.2%                           |
| 6                                                                                                 |                               | 15.66 mCi                         | 742 $\mu$ Ci  | 77 $\mu$ Ci    | 25 min         | 90.2 $\mu$ Ci        | 12.2%                          |
| Average RCC of <b>28-<sup>18</sup>F</b> from <b>28-Cl</b> : <b>10.7<math>\pm</math>1.2%</b> (n=3) |                               |                                   |               |                |                |                      |                                |

<sup>a</sup>0.01 mmol substrate.

Supplementary Table 29. HPLC-isolated RCCs of **28-<sup>18</sup>F**

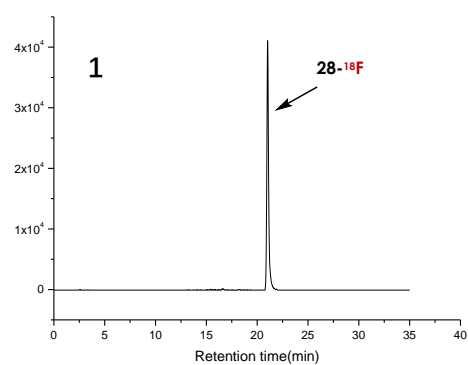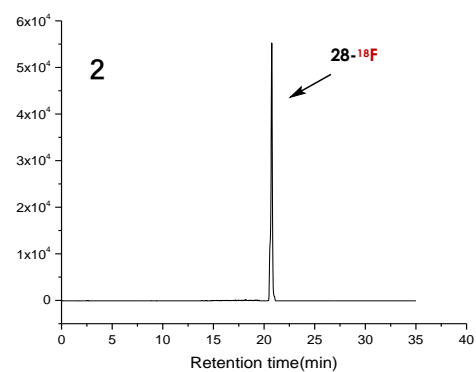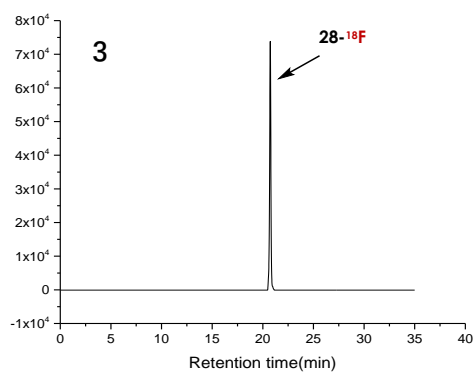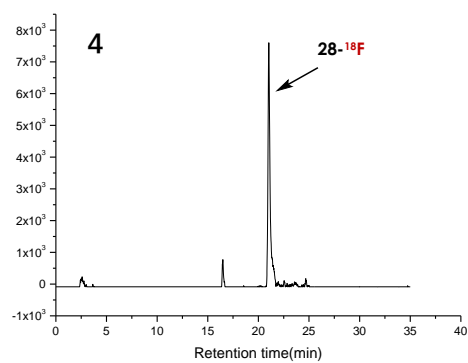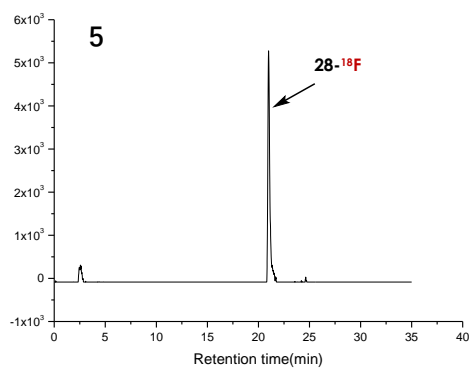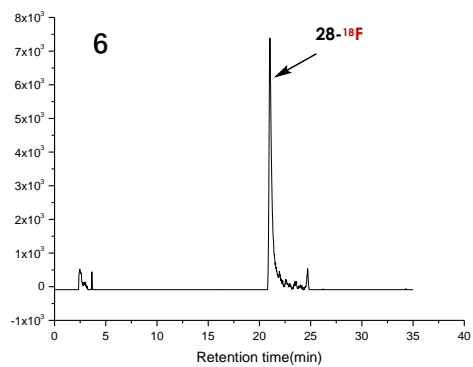

Supplementary Figure 58. Crude radio-HPLC traces from  $28\text{-F}$  and  $28\text{-Cl}$  to  $28-^{18}\text{F}$

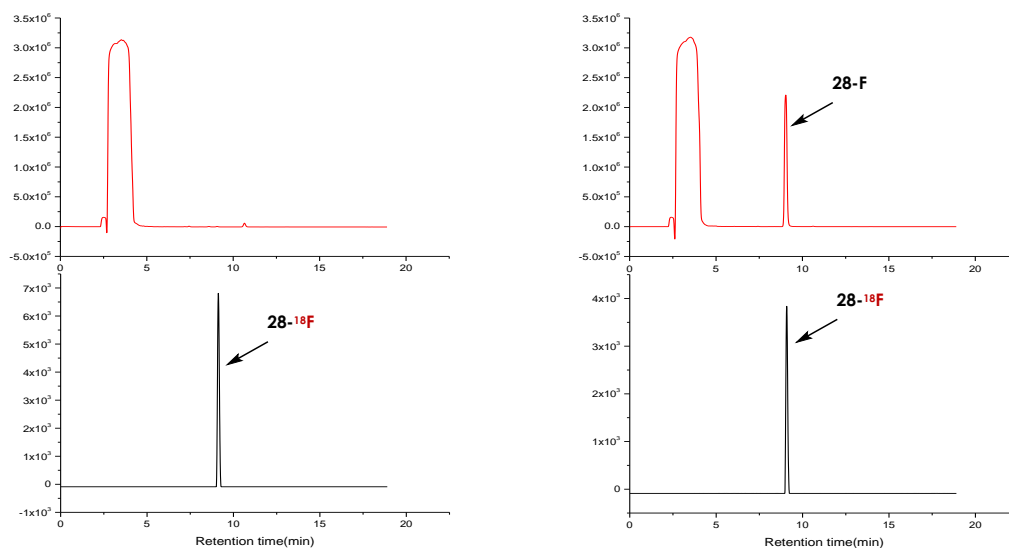

**Supplementary Figure 59.** Purification (left) and co-injection (right) for **28-<sup>18</sup>F**

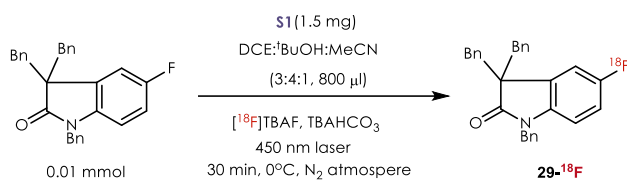

| Reaction | Substrate | Activity ([ <sup>18</sup> F]TBAF) | Injected dose | Collected dose | Isolation time | Decay corrected dose | Radiochemical conversion (RCC) |
|----------|-----------|-----------------------------------|---------------|----------------|----------------|----------------------|--------------------------------|
| 1        |           | 14.86 mCi                         | 555 $\mu$ Ci  | 188 $\mu$ Ci   | 25 min         | 220.1 $\mu$ Ci       | 39.7%                          |
| 2        | <b>29</b> | 9.16 mCi                          | 298 $\mu$ Ci  | 75 $\mu$ Ci    | 22 min         | 86.2 $\mu$ Ci        | 28.9%                          |
| 3        |           | 10.37 mCi                         | 382 $\mu$ Ci  | 108 $\mu$ Ci   | 23 min         | 124.9 $\mu$ Ci       | 32.7%                          |

Average RCC: **33.8 $\pm$ 4.5%** (n=3)

**Supplementary Table 30.** HPLC-isolated RCCs of **29-<sup>18</sup>F**

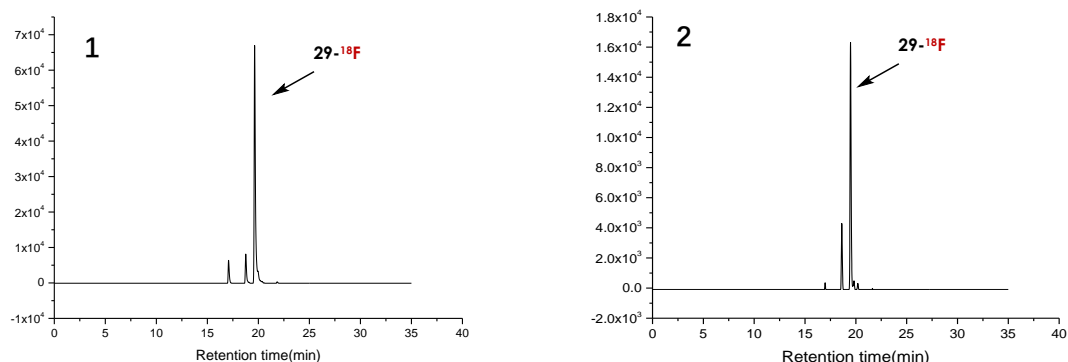

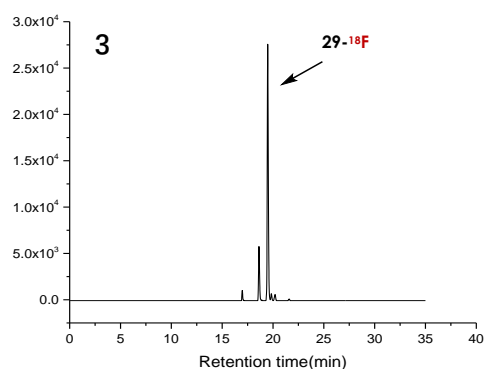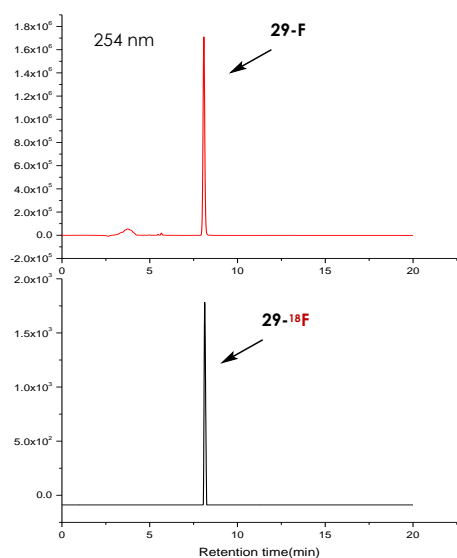

**Supplementary Figure 60.** Radio-HPLC traces and purification of **29-<sup>18</sup>F**

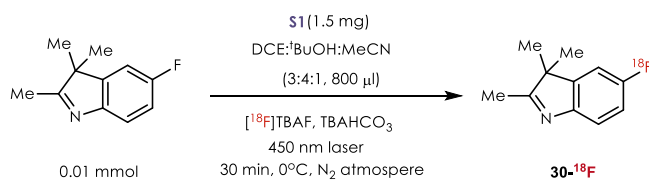

| Reaction                                                                                          | Substrate                       | Activity ([ <sup>18</sup> F]TBAF) | Injected dose | Collected dose | Isolation time | Decay corrected dose | Radiochemical conversion (RCC) |
|---------------------------------------------------------------------------------------------------|---------------------------------|-----------------------------------|---------------|----------------|----------------|----------------------|--------------------------------|
| 1                                                                                                 |                                 | 15.66 mCi                         | 349 $\mu$ Ci  | 231 $\mu$ Ci   | 12 min         | 249.2 $\mu$ Ci       | 71.4%                          |
| 2                                                                                                 | <b>30-F</b> (X=F)               | 11.33 mCi                         | 405 $\mu$ Ci  | 260 $\mu$ Ci   | 12 min         | 280.5 $\mu$ Ci       | 69.3%                          |
| 3                                                                                                 |                                 | 9.28 mCi                          | 459 $\mu$ Ci  | 266 $\mu$ Ci   | 14 min         | 290.6 $\mu$ Ci       | 63.3%                          |
| Average RCC of <b>30-<sup>18</sup>F</b> from <b>30-F</b> : <b>68.0%<math>\pm</math>3.4%</b> (n=3) |                                 |                                   |               |                |                |                      |                                |
| 4                                                                                                 | <b>30-Cl<sup>o</sup></b> (X=Cl) | 12.81 mCi                         | 449 $\mu$ Ci  | 59 $\mu$ Ci    | 12 min         | 63.6 $\mu$ Ci        | 14.2%                          |
| 5                                                                                                 |                                 | 6.59 mCi                          | 286 $\mu$ Ci  | 42 $\mu$ Ci    | 12 min         | 46.5 $\mu$ Ci        | 16.1%                          |

|                                                                                                    |           |              |             |        |               |       |
|----------------------------------------------------------------------------------------------------|-----------|--------------|-------------|--------|---------------|-------|
| 6                                                                                                  | 11.87 mCi | 338 $\mu$ Ci | 57 $\mu$ Ci | 11 min | 61.1 $\mu$ Ci | 18.1% |
| Average RCC of <b>30-<sup>18</sup>F</b> from <b>30-Cl</b> : <b>16.1%<math>\pm</math>1.6%</b> (n=3) |           |              |             |        |               |       |

$\approx$ 0.05 mmol substrate.

**Supplementary Table 31.** HPLC-isolated RCCs of **30-<sup>18</sup>F**

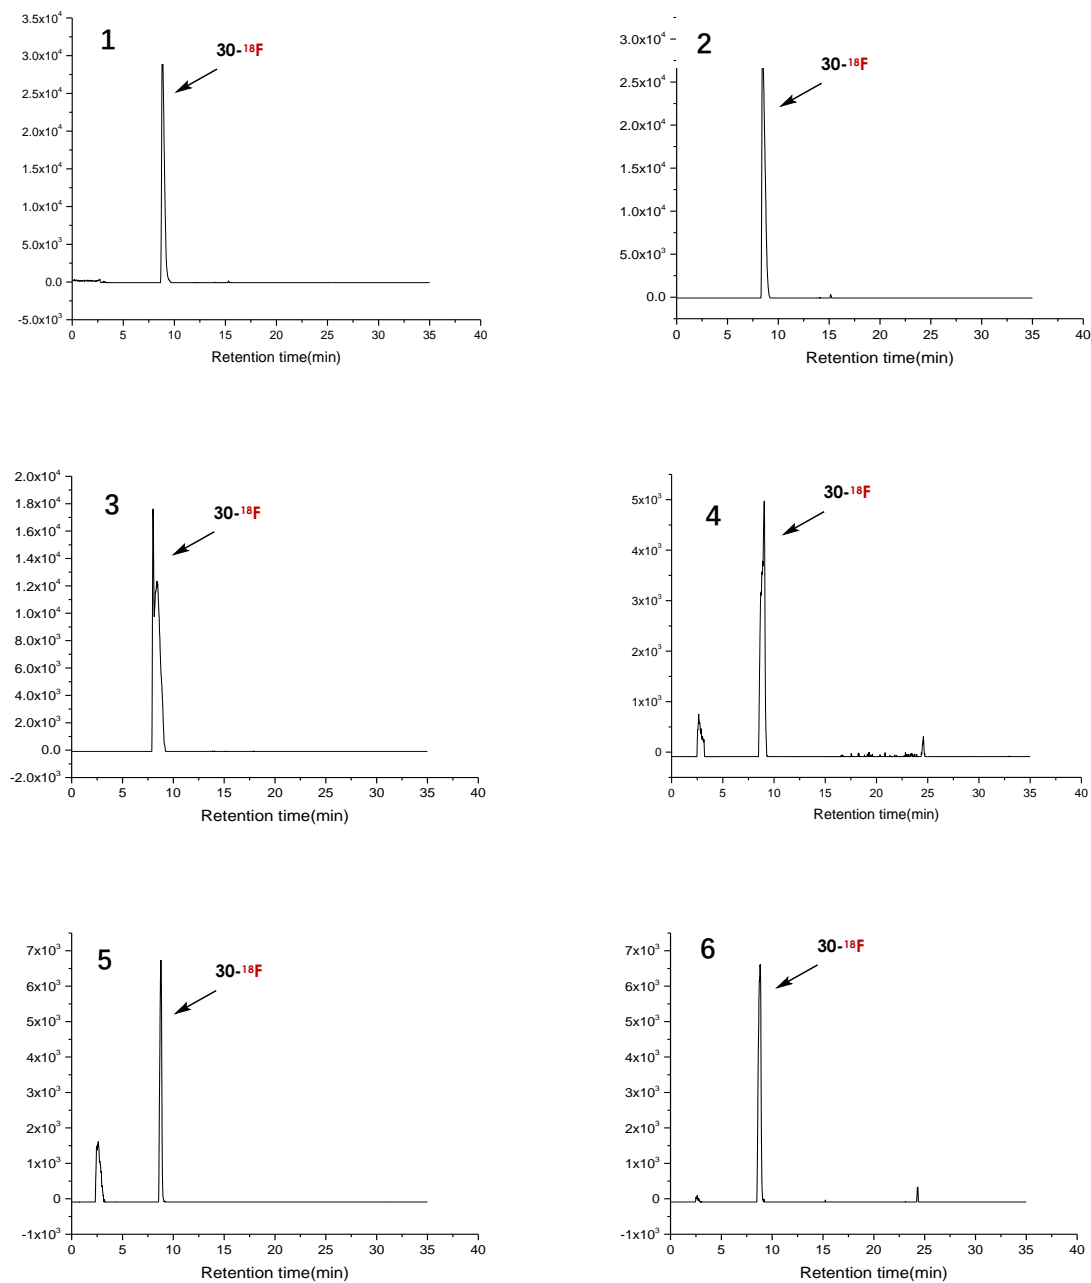

**Supplementary Figure 61.** Radio-HPLC traces from **30-F** and **30-Cl** to **30-<sup>18</sup>F**

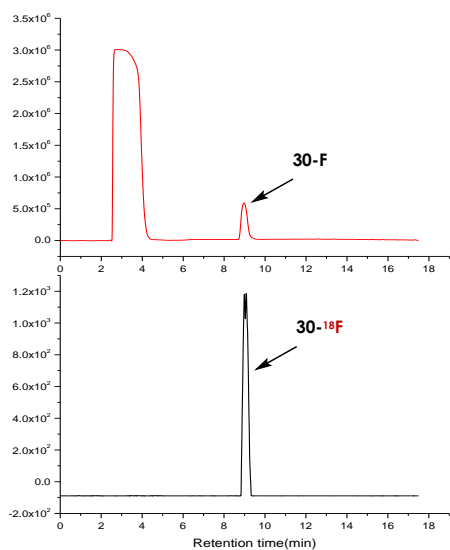

Supplementary Figure 62. Purification of **30-<sup>18</sup>F**

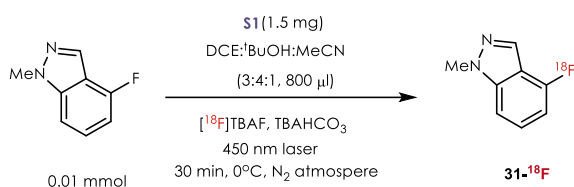

| Reaction | Substrate | Activity ([ <sup>18</sup> F]TBAF) | Injected dose | Collected dose | Isolation time | Decay corrected dose | Radiochemical conversion (RCC) |
|----------|-----------|-----------------------------------|---------------|----------------|----------------|----------------------|--------------------------------|
| 1        |           | 16.44 mCi                         | 863 $\mu$ Ci  | 361 $\mu$ Ci   | 15 min         | 396.9 $\mu$ Ci       | 46%                            |
| 2        | <b>31</b> | 5.91 mCi                          | 339 $\mu$ Ci  | 106 $\mu$ Ci   | 15 min         | 116.5 $\mu$ Ci       | 34.4%                          |
| 3        |           | 12.62 mCi                         | 489 $\mu$ Ci  | 149 $\mu$ Ci   | 16 min         | 164.8 $\mu$ Ci       | 33.7%                          |

Average RCC: **38.0% $\pm$ 5.6%** (n=3)

Supplementary Table 32. HPLC-isolated RCCs of **31-<sup>18</sup>F**

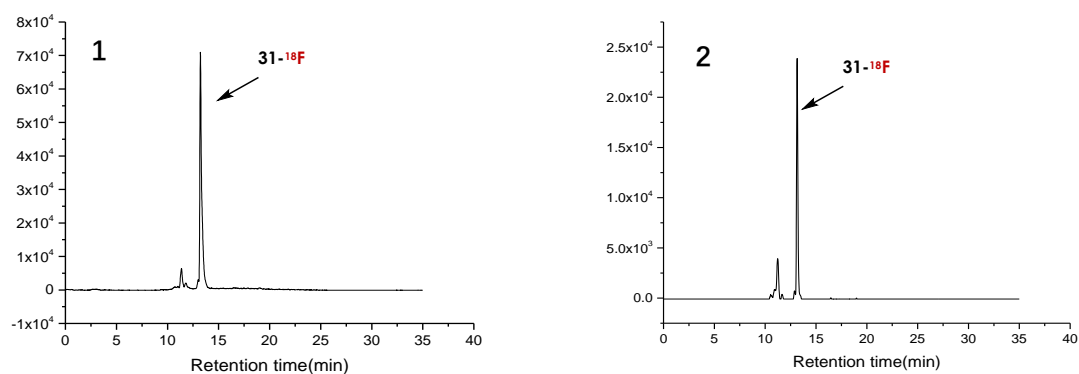



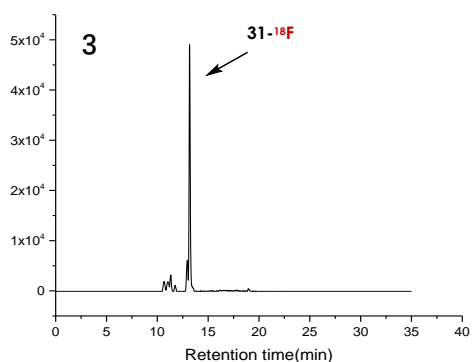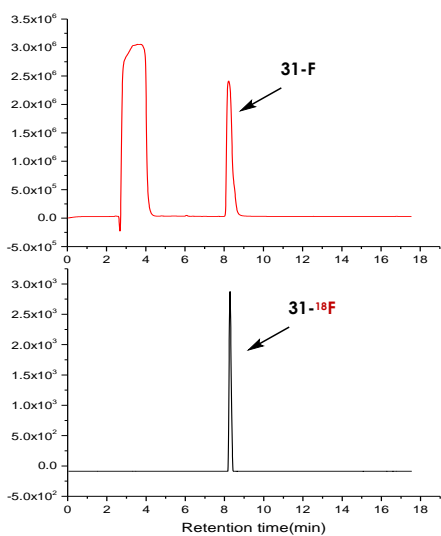

Supplementary Figure 63. Radio-HPLC traces and purification of **31-<sup>18</sup>F**

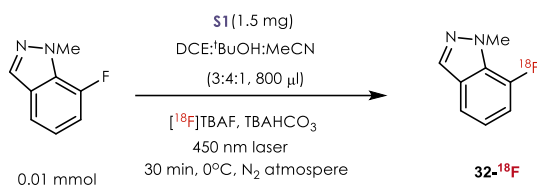

| Reaction | Substrate | Activity ([ <sup>18</sup> F]TBAF) | Injected dose | Collected dose | Isolation time | Decay corrected dose | Radiochemical conversion (RCC) |
|----------|-----------|-----------------------------------|---------------|----------------|----------------|----------------------|--------------------------------|
| 1        |           | 9.54 mCi                          | 528 $\mu$ Ci  | 189 $\mu$ Ci   | 17 min         | 210.4 $\mu$ Ci       | 39.9%                          |
| 2        | <b>32</b> | 7.95 mCi                          | 448 $\mu$ Ci  | 133 $\mu$ Ci   | 16 min         | 147.1 $\mu$ Ci       | 32.8%                          |
| 3        |           | 6.39 mCi                          | 366 $\mu$ Ci  | 149 $\mu$ Ci   | 16 min         | 164.8 $\mu$ Ci       | 45.0%                          |

Average RCC: **39.2% $\pm$ 5.0%** (n=3)

Supplementary Table 33. HPLC-isolated RCCs of **32-<sup>18</sup>F**

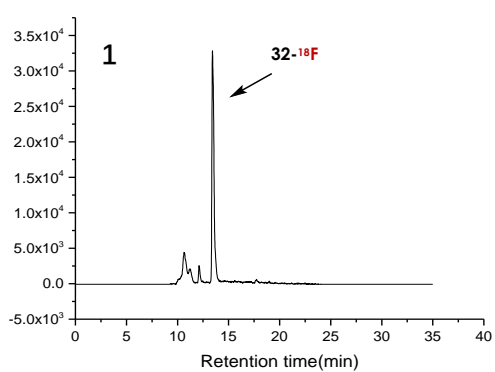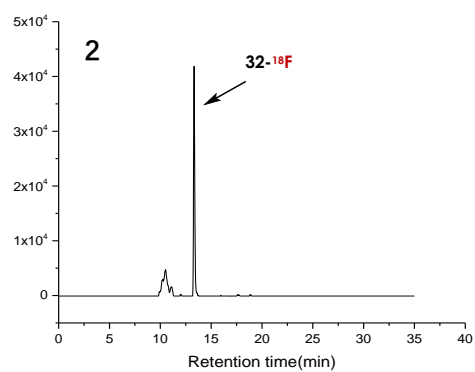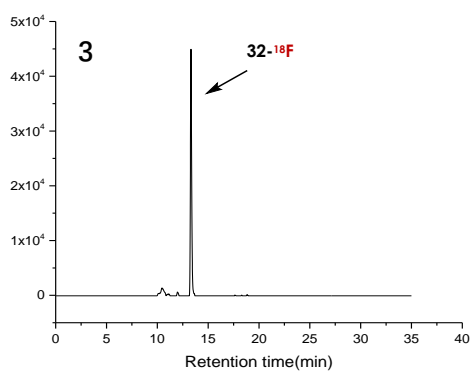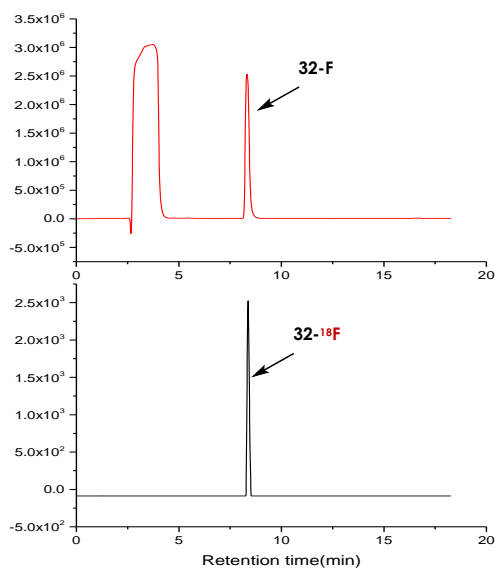

Supplementary Figure 64. Crude radio-HPLC traces and purification of  $^{32}\text{-}^{18}\text{F}$

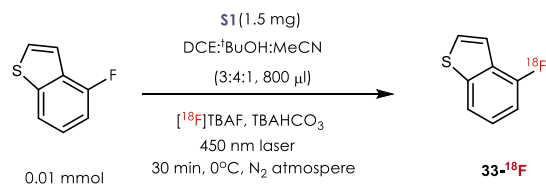

| Reaction | Substrate | Activity ([ <sup>18</sup> F]TBAF) | Injected dose | Collected dose | Isolation time | Decay corrected dose | Radiochemical conversion (RCC) |
|----------|-----------|-----------------------------------|---------------|----------------|----------------|----------------------|--------------------------------|
| 1        | 33        | 10.94 mCi                         | 421 $\mu$ Ci  | 108 $\mu$ Ci   | 19 min         | 121.8 $\mu$ Ci       | 28.9%                          |
| 2        |           | 14.56 mCi                         | 638 $\mu$ Ci  | 171 $\mu$ Ci   | 19 min         | 192.8 $\mu$ Ci       | 30.2%                          |
| 3        |           | 8.05 mCi                          | 364 $\mu$ Ci  | 110 $\mu$ Ci   | 19 min         | 124.0 $\mu$ Ci       | 34.1%                          |

Average RCC: **31.1% $\pm$ 2.2%** (n=3)

**Supplementary Table 34.** HPLC-isolated RCCs of **33-<sup>18</sup>F**

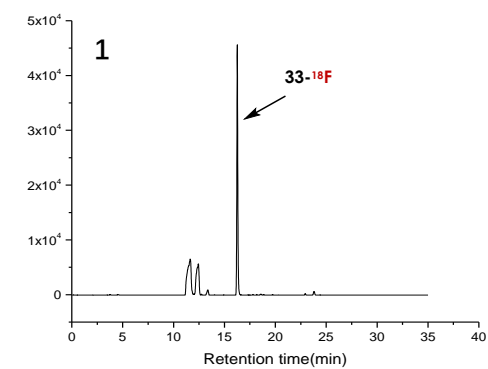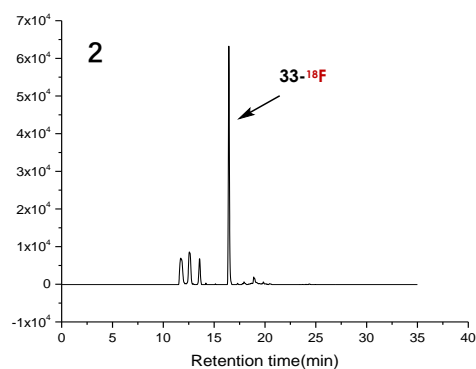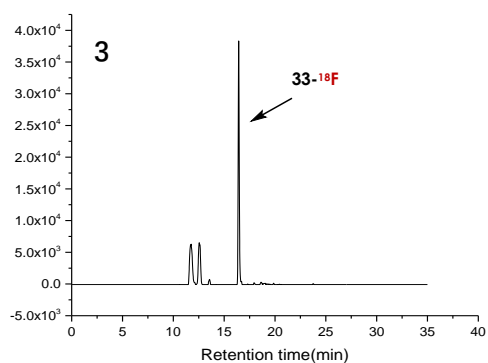

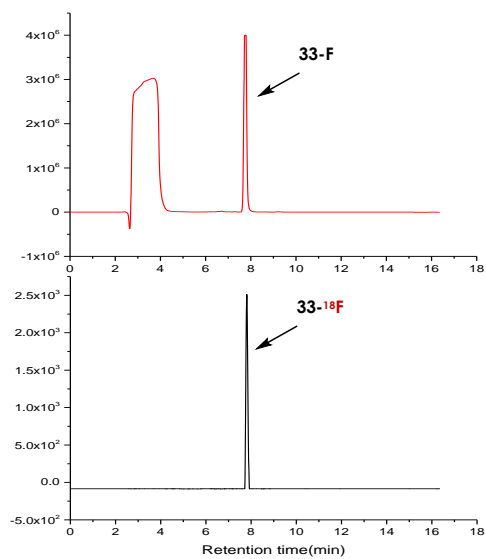

Supplementary Figure 65. Crude radio-HPLC traces and purification of **33-<sup>18</sup>F**

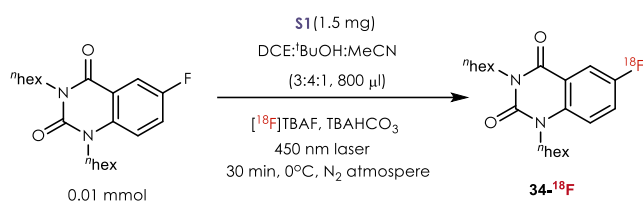

| Reaction | Substrate | Activity ([ <sup>18</sup> F]TBAF) | Injected dose | Collected dose | Isolation time | Decay corrected dose | Radiochemical conversion (RCC) |
|----------|-----------|-----------------------------------|---------------|----------------|----------------|----------------------|--------------------------------|
| 1        |           | 15.81 mCi                         | 903 $\mu$ Ci  | 369 $\mu$ Ci   | 25 min         | 432.1 $\mu$ Ci       | 47.9%                          |
| 2        | <b>34</b> | 11.04 mCi                         | 493 $\mu$ Ci  | 255 $\mu$ Ci   | 24 min         | 296.7 $\mu$ Ci       | 60.2%                          |
| 3        |           | 9.16 mCi                          | 317 $\mu$ Ci  | 129 $\mu$ Ci   | 24 min         | 150.1 $\mu$ Ci       | 47.4%                          |

Average RCC: **51.8% $\pm$ 5.9%** (n=3)

Supplementary Table 35. HPLC-isolated RCCs of **34-<sup>18</sup>F**

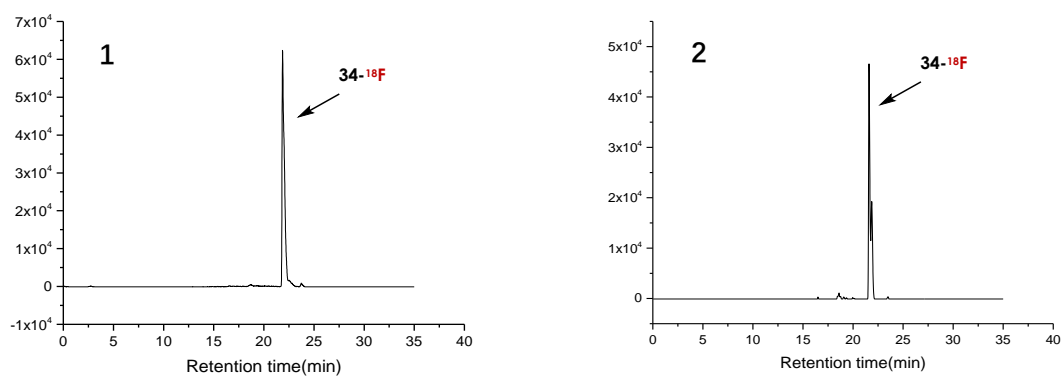

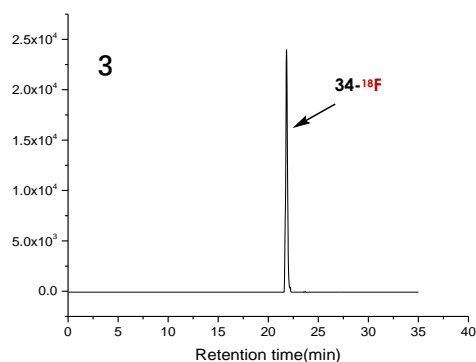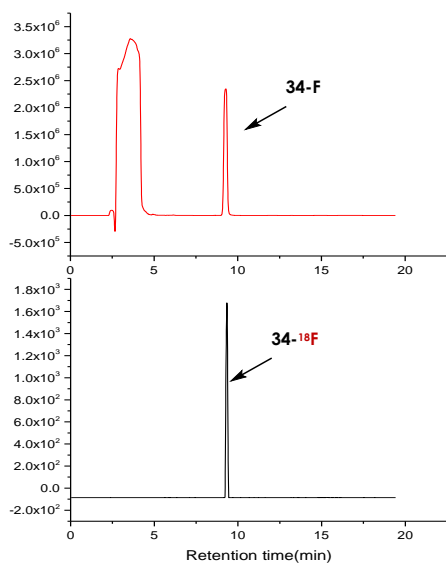

**Supplementary Figure 66.** Crude radio-HPLC traces and purification of **34-<sup>18</sup>F**

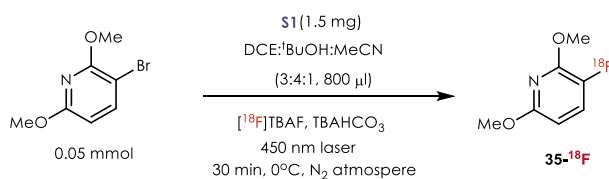

| Reaction                                           | Substrate | Activity ([ <sup>18</sup> F]TBAF) | Injected dose | Collected dose | Isolation time | Decay corrected dose | Radiochemical conversion (RCC) |
|----------------------------------------------------|-----------|-----------------------------------|---------------|----------------|----------------|----------------------|--------------------------------|
| 1                                                  |           | 10.08 mCi                         | 463 $\mu$ Ci  | 72 $\mu$ Ci    | 17 min         | 80.2 $\mu$ Ci        | 17.3%                          |
| 2                                                  | <b>35</b> | 9.22 mCi                          | 465 $\mu$ Ci  | 68 $\mu$ Ci    | 17 min         | 75.7 $\mu$ Ci        | 16.3%                          |
| 3                                                  |           | 11.48 mCi                         | 636 $\mu$ Ci  | 147 $\mu$ Ci   | 17 min         | 163.7 $\mu$ Ci       | 25.7%                          |
| Average RCC: <b>19.8<math>\pm</math>4.2%</b> (n=3) |           |                                   |               |                |                |                      |                                |

**Supplementary Table 36.** HPLC-isolated RCCs of **35-<sup>18</sup>F**

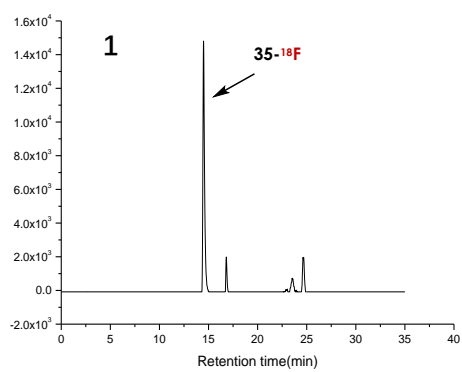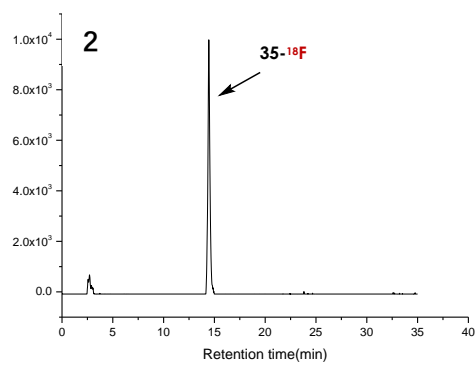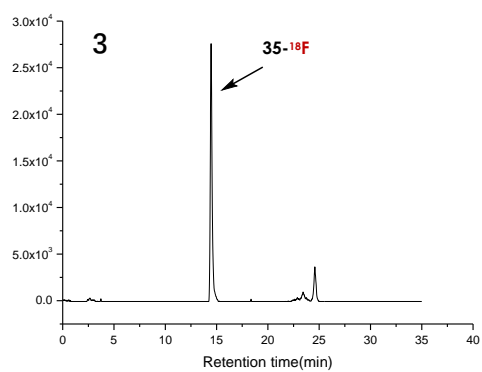

Supplementary Figure 67. Crude radio-HPLC traces from 35 to  $^{35}\text{-}^{18}\text{F}$

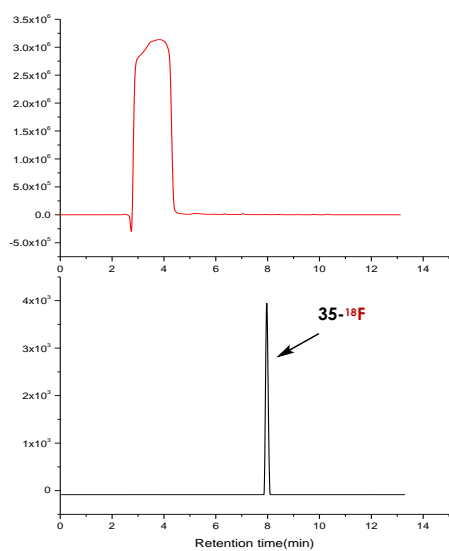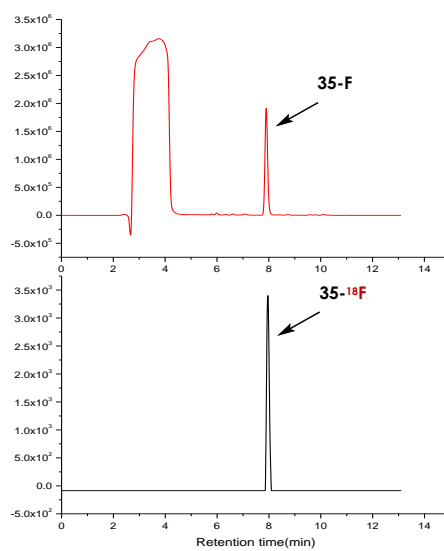

Supplementary Figure 68. Purification (left) and co-injection for  $^{35}\text{-}^{18}\text{F}$

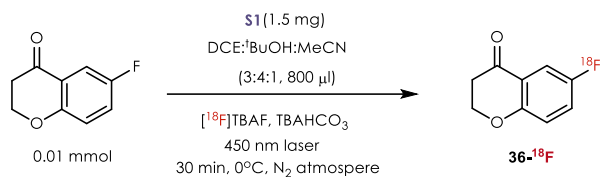

| Reaction       | Substrate | Activity ([ $^{18}\text{F}$ ]TBAF) | Injected dose      | Collected dose     | Isolation time | Decay corrected dose | Radiochemical conversion (RCC) |
|----------------|-----------|------------------------------------|--------------------|--------------------|----------------|----------------------|--------------------------------|
| 1              | 36        | 17.33 mCi                          | 821 $\mu\text{Ci}$ | 86 $\mu\text{Ci}$  | 15 min         | 94.5 $\mu\text{Ci}$  | 11.5%                          |
| 2 <sup>a</sup> |           | 13.30 mCi                          | 600 $\mu\text{Ci}$ | 150 $\mu\text{Ci}$ | 16 min         | 165.9 $\mu\text{Ci}$ | 27.7%                          |
| 3 <sup>a</sup> |           | 8.74 mCi                           | 352 $\mu\text{Ci}$ | 72 $\mu\text{Ci}$  | 15 min         | 79.2 $\mu\text{Ci}$  | 22.5%                          |
| 4 <sup>a</sup> |           | 3.36 mCi                           | 218 $\mu\text{Ci}$ | 65 $\mu\text{Ci}$  | 15 min         | 71.5 $\mu\text{Ci}$  | 32.8%                          |

Average RCC from 0.05mmol substrate: **27.7 $\pm$ 4.2%** (n=3)

<sup>a</sup>0.05 mmol substrate.

**Supplementary Table 37.** HPLC-isolated RCCs of **36- $^{18}\text{F}$**

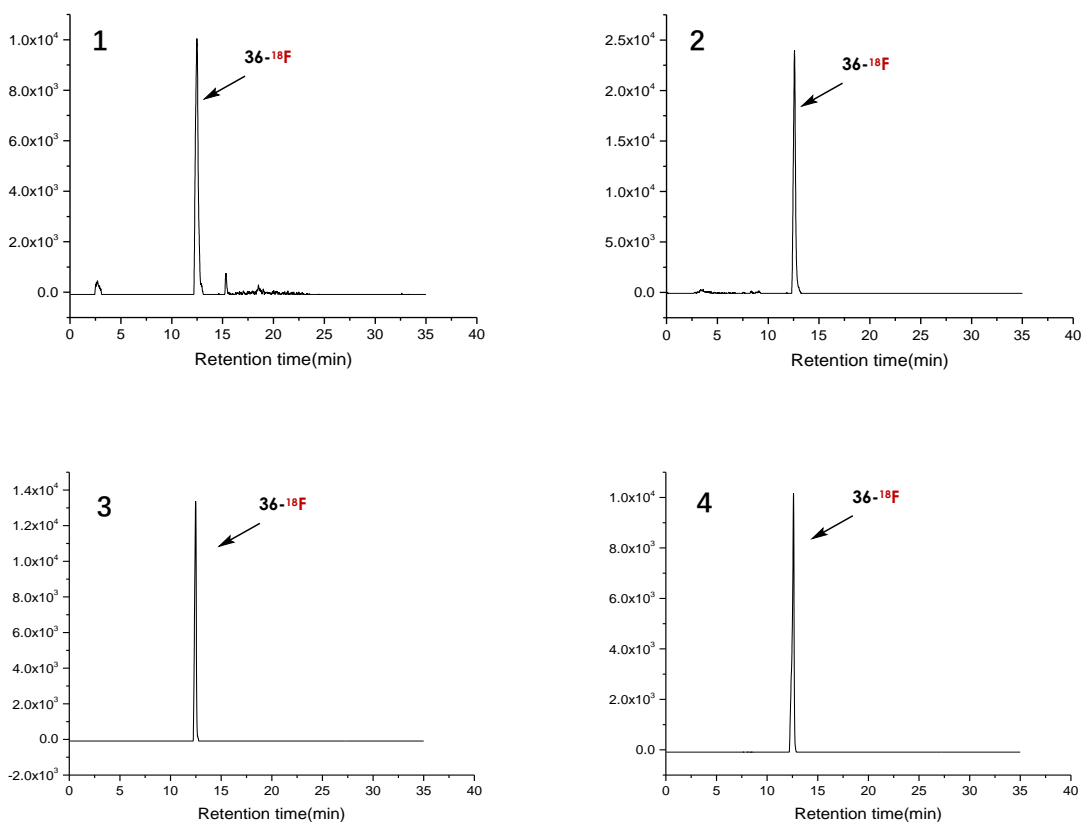

**Supplementary Figure 69.** Crude radio-HPLC traces from **36** to **36- $^{18}\text{F}$**

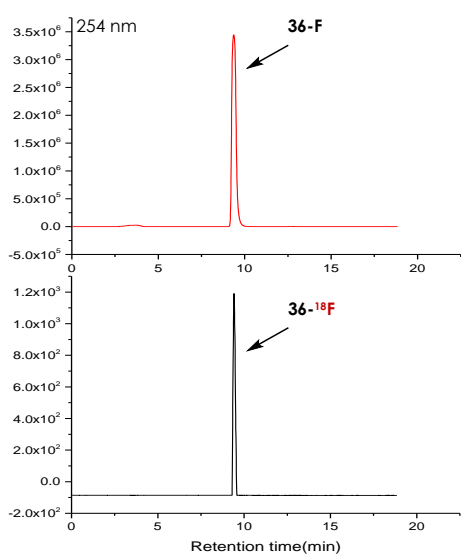

Supplementary Figure 70. Purification of **36-<sup>18</sup>F**

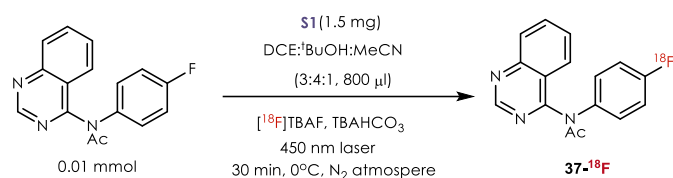

| Reaction                                           | Substrate | Activity ([ <sup>18</sup> F]TBAF) | Injected dose | Collected dose | Isolation time | Decay corrected dose | Radiochemical conversion (RCC) |
|----------------------------------------------------|-----------|-----------------------------------|---------------|----------------|----------------|----------------------|--------------------------------|
| 1                                                  | 37        | 20.0 mCi                          | 584 $\mu$ Ci  | 76 $\mu$ Ci    | 16 min         | 84.1 $\mu$ Ci        | 14.4%                          |
| 2                                                  |           | 12.36 mCi                         | 508 $\mu$ Ci  | 61 $\mu$ Ci    | 16 min         | 67.5 $\mu$ Ci        | 13.3 %                         |
| 3                                                  |           | 8.18 mCi                          | 437 $\mu$ Ci  | 87 $\mu$ Ci    | 16 min         | 96.2 $\mu$ Ci        | 22.0%                          |
| Average RCC: <b>16.6<math>\pm</math>3.9%</b> (n=3) |           |                                   |               |                |                |                      |                                |

Supplementary Table 38. HPLC-isolated RCC of **37-<sup>18</sup>F**

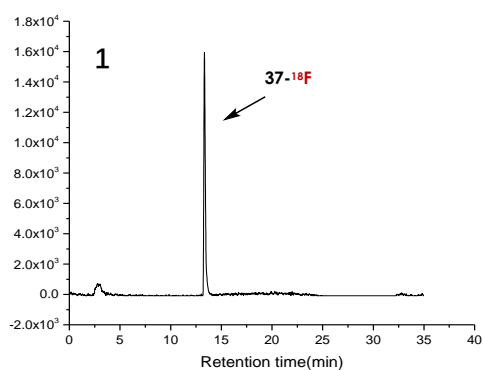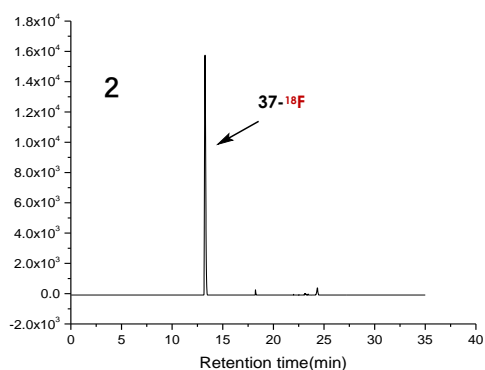



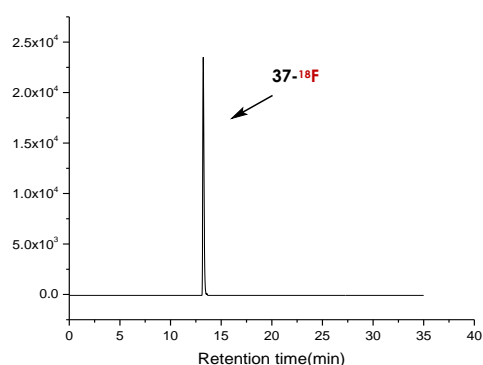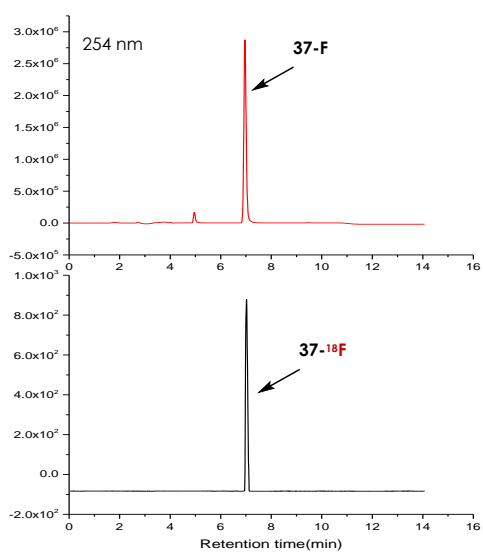

**Supplementary Figure 71.** Crude radio-HPLC traces and purification of **37-<sup>18</sup>F**

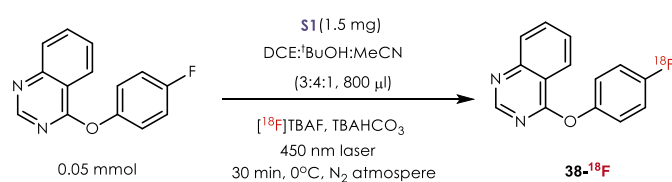

| Reaction                                           | Substrate | Activity ([ <sup>18</sup> F]TBAF) | Injected dose | Collected dose | Isolation time | Decay corrected dose | Radiochemical conversion (RCC) |
|----------------------------------------------------|-----------|-----------------------------------|---------------|----------------|----------------|----------------------|--------------------------------|
| 1                                                  | <b>38</b> | 16.32 mCi                         | 848 $\mu$ Ci  | 46 $\mu$ Ci    | 18 min         | 51.5 $\mu$ Ci        | 6.1%                           |
| 2 <sup>a</sup>                                     |           | 12.65 mCi                         | 833 $\mu$ Ci  | 103 $\mu$ Ci   | 18 min         | 115.4 $\mu$ Ci       | 13.9%                          |
| 3 <sup>a</sup>                                     |           | 10.01 mCi                         | 350 $\mu$ Ci  | 33 $\mu$ Ci    | 17 min         | 36.7 $\mu$ Ci        | 10.5%                          |
| 4 <sup>a</sup>                                     |           | 8.35 mCi                          | 427 $\mu$ Ci  | 47 $\mu$ Ci    | 16 min         | 52.0 $\mu$ Ci        | 12.2%                          |
| Average RCC: <b>12.2<math>\pm</math>1.4%</b> (n=3) |           |                                   |               |                |                |                      |                                |

<sup>a</sup>reaction was performed under air.

Supplementary Table 39. HPLC-isolated RCCs of **38-<sup>18</sup>F**

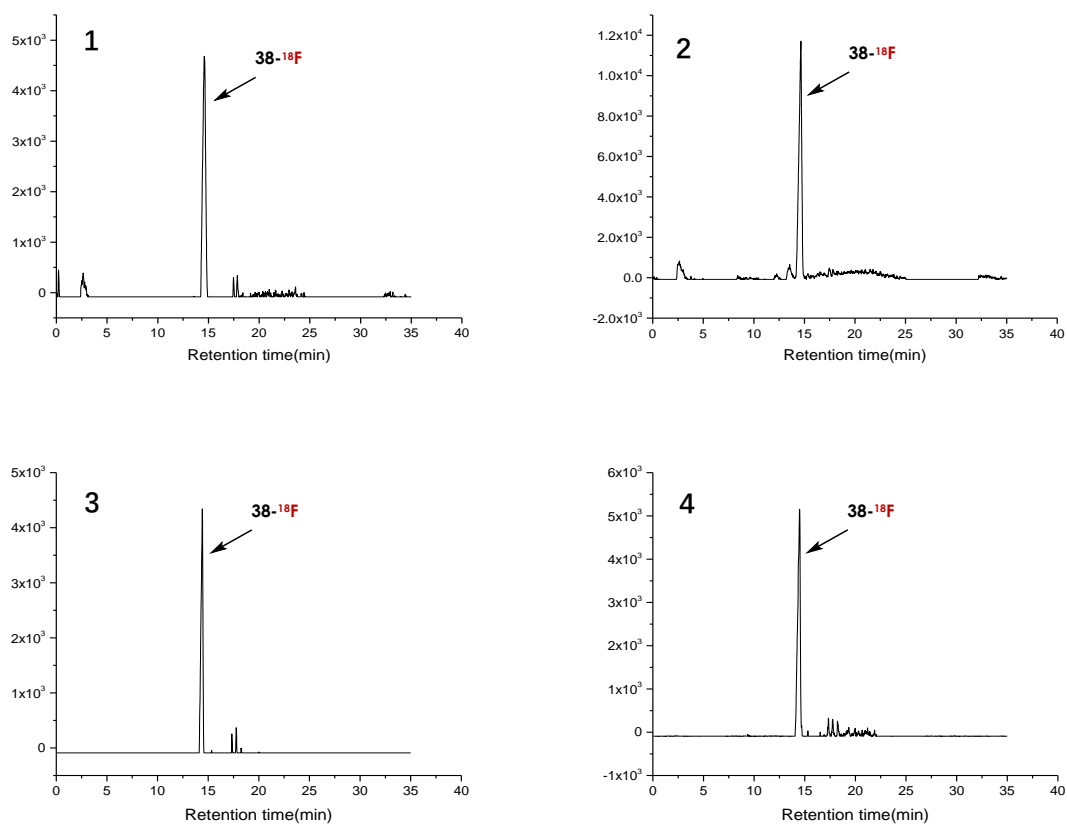

Supplementary Figure 72. Crude radio-HPLC traces from **38** to **38-<sup>18</sup>F**

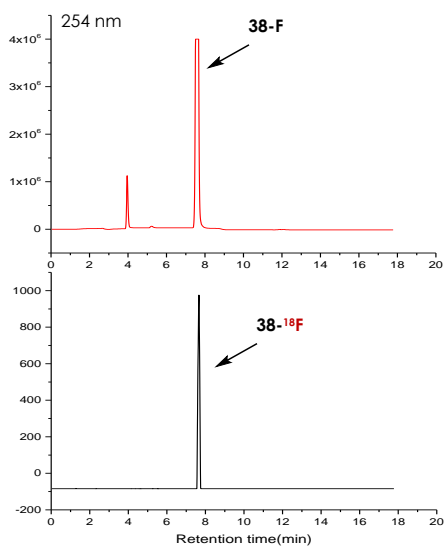

Supplementary Figure 73. Purification for **38-<sup>18</sup>F**

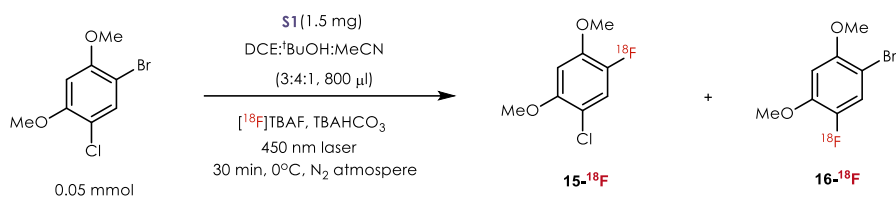

| Reaction | Substrate | Activity ([ <sup>18</sup> F]TBAF) | Injected dose | Collected dose | Isolation time | Decay corrected dose | Radiochemical conversion (RCC) |
|----------|-----------|-----------------------------------|---------------|----------------|----------------|----------------------|--------------------------------|
| 1        | 39        | 12.93 mCi                         | 456 µCi       | 121 µCi        | 19 min         | 136.4 µCi            | 29.9% (16- <sup>18</sup> F)    |
|          |           |                                   |               | 85 µCi         | 20 min         | 96.4 µCi             | 21.1% (15- <sup>18</sup> F)    |

Supplementary Table 40. HPLC-isolated RCCs of 16-<sup>18</sup>F and 15-<sup>18</sup>F

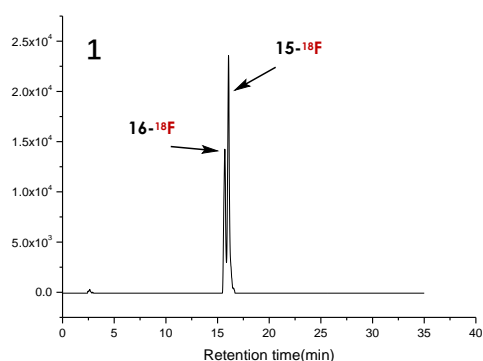

Supplementary Figure 74. Crude radio-HPLC trace from 40 to 16-<sup>18</sup>F and 15-<sup>18</sup>F

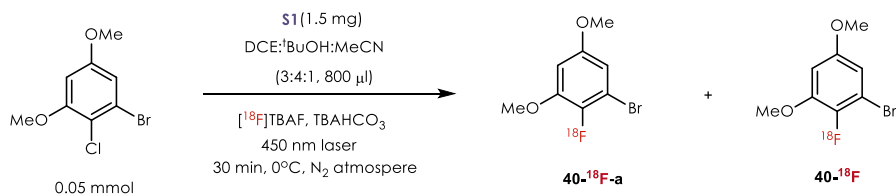

| Reaction                     | Substrate | Activity ([ <sup>18</sup> F]TBAF) | Injected dose | Collected dose | Isolation time | Decay corrected dose | Radiochemical conversion (RCC) |
|------------------------------|-----------|-----------------------------------|---------------|----------------|----------------|----------------------|--------------------------------|
| 1                            | 40        | 9.10 mCi                          | 650 µCi       | 408 µCi        | 20 min         | 462.9 µCi            | 71.2%                          |
| 2                            |           | 12.68 mCi                         | 581 µCi       | 403 µCi        | 19 min         | 454.4 µCi            | 78.2%                          |
| 3                            |           | 9.06 mCi                          | 408 µCi       | 263 µCi        | 19 min         | 296.5 µCi            | 72.7%                          |
| Average RCC: 74.0±3.0% (n=3) |           |                                   |               |                |                |                      |                                |

Supplementary Table 41. HPLC-isolated RCCs of 40-<sup>18</sup>F-a

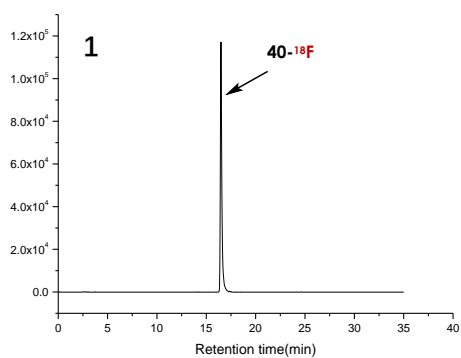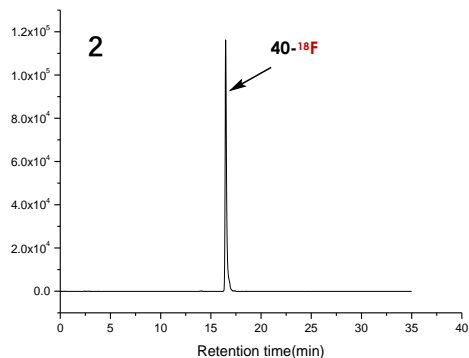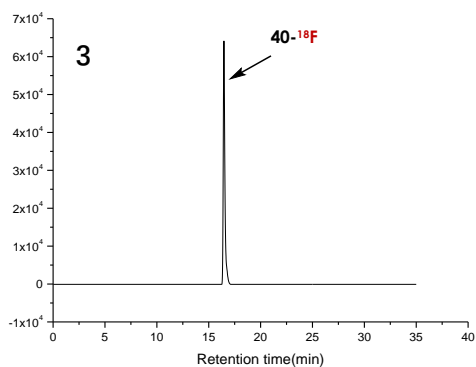

Supplementary Figure 75. Crude radio-HPLC traces from **40** to  **$40\text{-}^{18}\text{F}$**

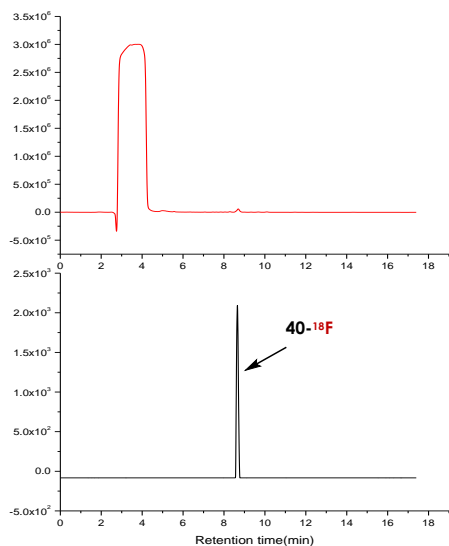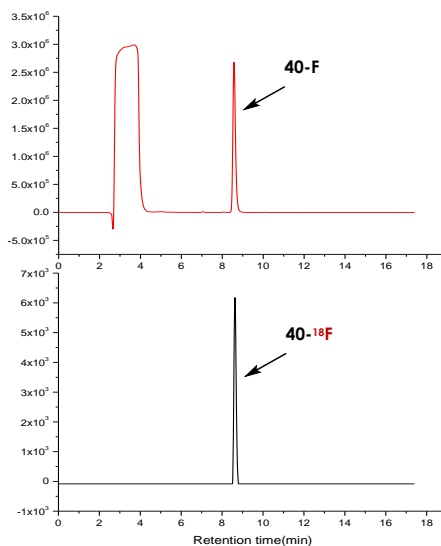

Supplementary Figure 76. Purification (left) and co-injection(right) for  **$40\text{-}^{18}\text{F}$**

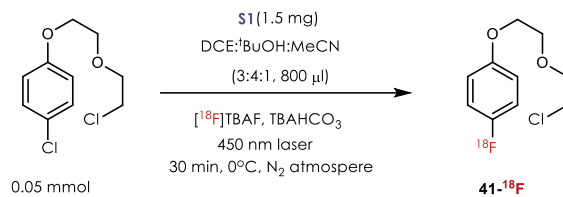

| Reaction | Substrate | Activity ([ <sup>18</sup> F]TBAF) | Injected dose | Collected dose | Isolation time | Decay corrected dose | Radiochemical conversion (RCC) |
|----------|-----------|-----------------------------------|---------------|----------------|----------------|----------------------|--------------------------------|
| 1        |           | 10.20 mCi                         | 480 μCi       | 62 μCi         | 18 min         | 69.5 μCi             | 14.5%                          |
| 2        | 41        | 9.32 mCi                          | 1332 μCi      | 188 μCi        | 20 min         | 213.3 μCi            | 16%                            |
| 3        |           | 10.11 mCi                         | 481 μCi       | 57 μCi         | 18 min         | 63.9 μCi             | 13.3%                          |

Average RCC: **14.6±1.1%** (n=3)

**Supplementary Table 42.** HPLC-isolated RCCs of **41-<sup>18</sup>F**

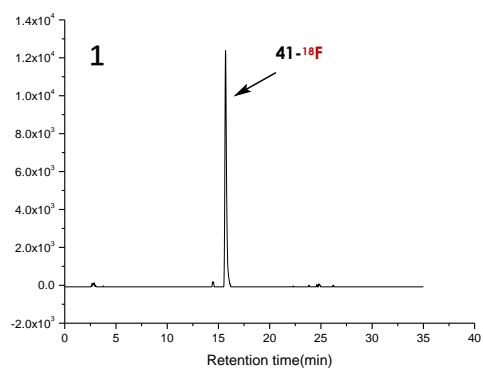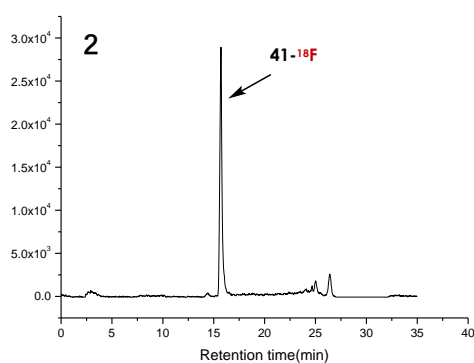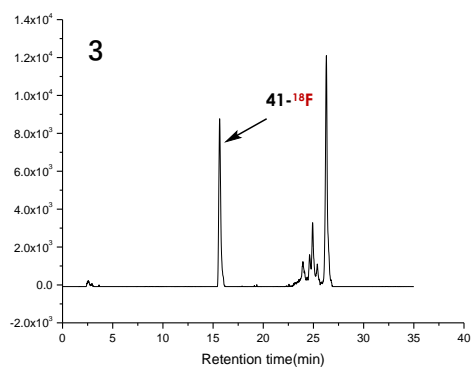

**Supplementary Figure 77.** Crude radio-HPLC traces from **41** to **41-<sup>18</sup>F**

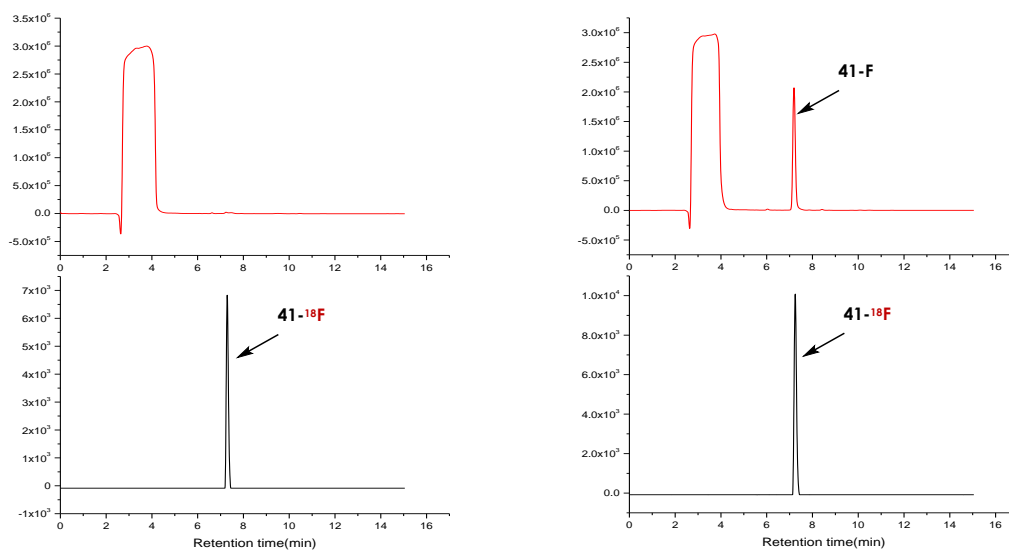

**Supplementary Figure 78.** Purification (left) and co-injection for **41-<sup>18</sup>F**

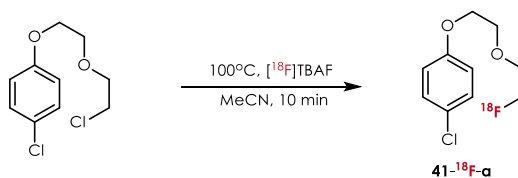

The MeCN solution (~200  $\mu$ l) of compound **41** (11.7 mg, 0.05 mmol) and [<sup>18</sup>F][TBAF] (21 mCi) were added to a 5 mL v-vial which was sealed with a Teflon-lined septum screw cap. The vial was heated in a heating block under 100°C for 10 min. The reaction was then diluted with MeCN and analyzed on HPLC. The data were summarized below.

**HPLC condition:**

Column: Phenomenex, Kinetex® 5  $\mu$ m F5 100 Å, 250 x 4.6 mm LC Column. Solvent A: 0.1%TFA water; Solvent B: 0.1%TFA acetonitrile; Isocratic elution at **55%** solvent B. Flow rate: 1 mL/min.

| Reaction | Substrate | Activity ([ <sup>18</sup> F]TBAF) | Injected dose | Collected dose | Isolation time | Decay corrected dose | Radiochemical conversion (RCC) |
|----------|-----------|-----------------------------------|---------------|----------------|----------------|----------------------|--------------------------------|
| 1        | 41        | 21 mCi                            | 417 $\mu$ Ci  | 149 $\mu$ Ci   | 10 min         | 158.7 $\mu$ Ci       | 38.1%                          |

**Supplementary Table 43.** HPLC-isolated RCC of **41-<sup>18</sup>F-a**

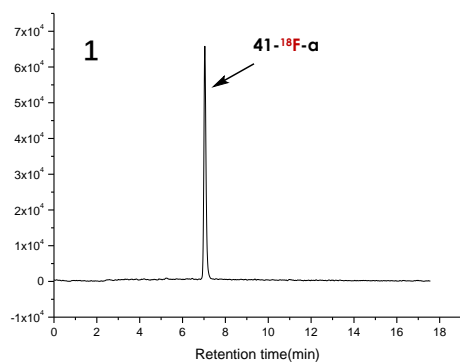

Supplementary Figure 79. Crude radio-HPLC traces from **41** to **41-<sup>18</sup>F-a**

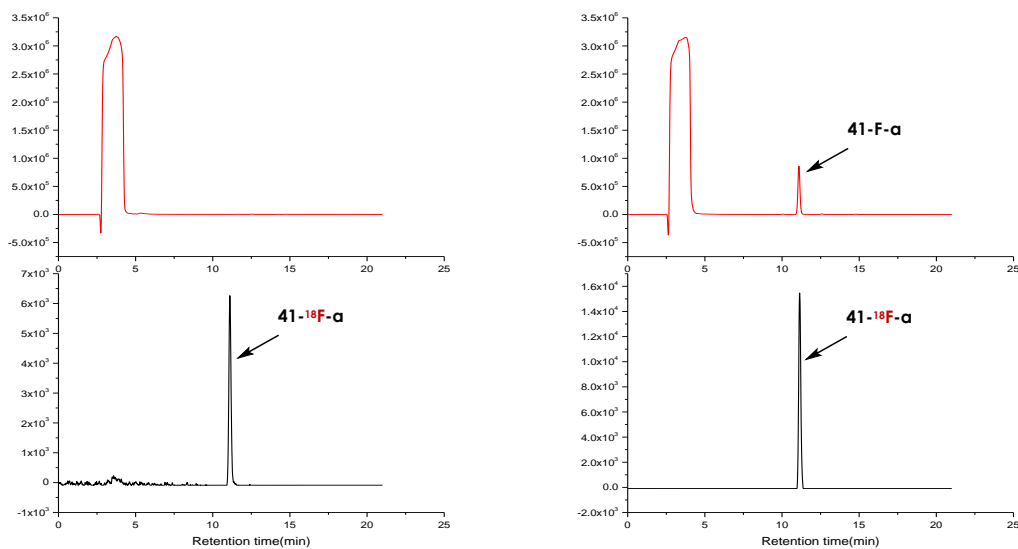

Supplementary Figure 80. Purification (left) and co-injection(right) for **41-<sup>18</sup>F-a**

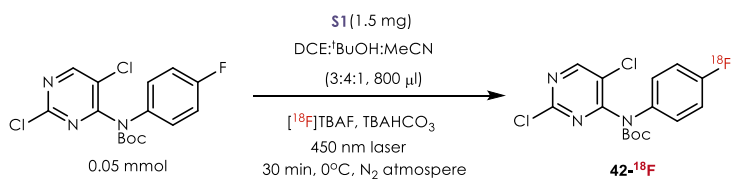

| Reaction | Substrate | Activity ([ <sup>18</sup> F]TBAF) | Injected dose | Collected dose | Isolation time | Decay corrected dose | Radiochemical conversion (RCC) |
|----------|-----------|-----------------------------------|---------------|----------------|----------------|----------------------|--------------------------------|
| 1        | <b>42</b> | 15.98 mCi                         | 777 μCi       | 83 μCi         | 22 min         | 95.4 μCi             | 12.3%                          |

Supplementary Table 44. HPLC-isolated RCC of **42-<sup>18</sup>F**

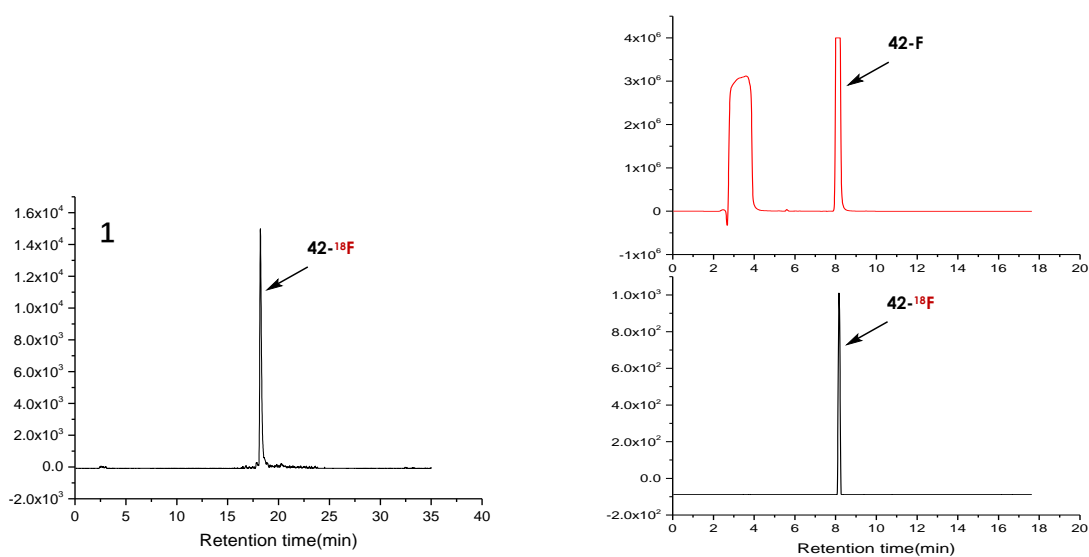

Supplementary Figure 81. Crude radio-HPLC trace(left) and purification (right) of **42-<sup>18</sup>F**

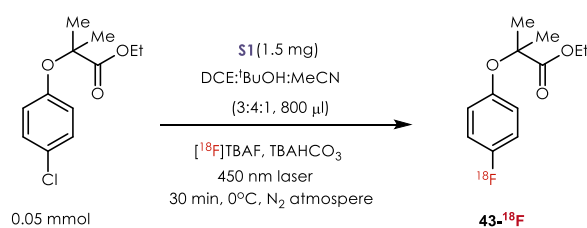

| Reaction                                           | Substrate | Activity<br>([ <sup>18</sup> F]TBAF) | Injected<br>dose | Collected<br>dose | Isolation<br>time | Decay<br>corrected<br>dose | Radiochemical<br>conversion<br>(RCC) |
|----------------------------------------------------|-----------|--------------------------------------|------------------|-------------------|-------------------|----------------------------|--------------------------------------|
| 1                                                  |           | 12.48 mCi                            | 396 $\mu$ Ci     | 150 $\mu$ Ci      | 20 min            | 170.2 $\mu$ Ci             | 43%                                  |
| 2                                                  | <b>43</b> | 12.12 mCi                            | 488 $\mu$ Ci     | 158 $\mu$ Ci      | 20 min            | 179.3 $\mu$ Ci             | 36.7%                                |
| 3                                                  |           | 8.81 mCi                             | 478 $\mu$ Ci     | 164 $\mu$ Ci      | 20 min            | 186.1 $\mu$ Ci             | 38.9%                                |
| Average RCC: <b>39.5<math>\pm</math>2.6%</b> (n=3) |           |                                      |                  |                   |                   |                            |                                      |

Supplementary Table 45. HPLC-isolated RCCs of **43-<sup>18</sup>F**

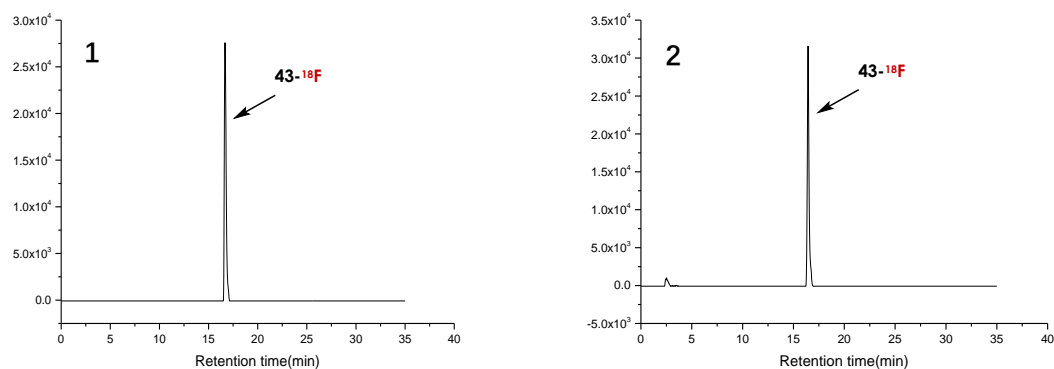



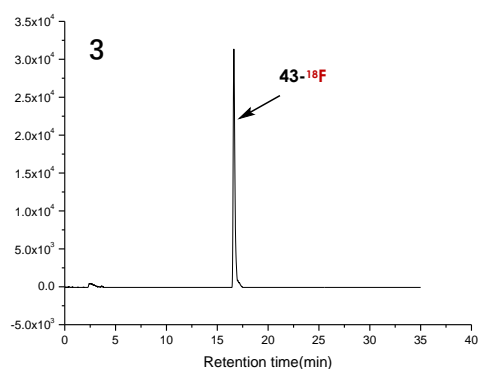

Supplementary Figure 82. Crude radio-HPLC traces from **43** to **43-<sup>18</sup>F**

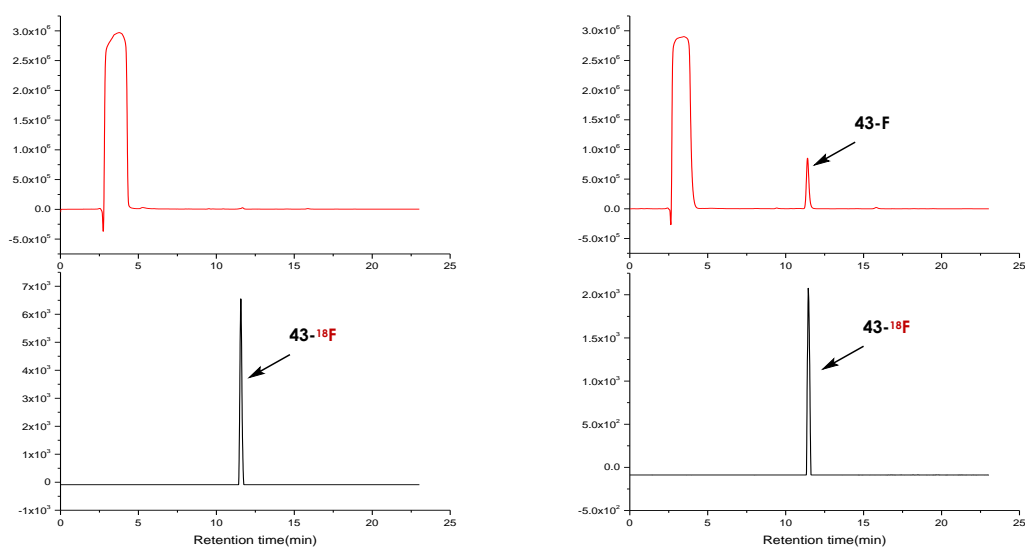

Supplementary Figure 83. Purification (left) and co-injection(right) for **43-<sup>18</sup>F**

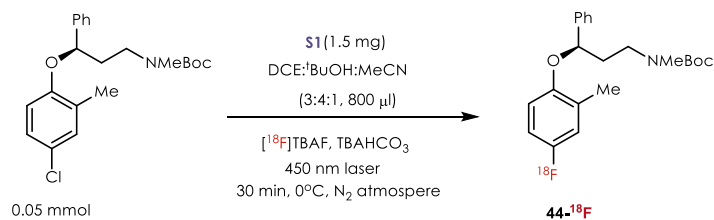

| Reaction                            | Substrate | Activity ([ <sup>18</sup> F]TBAF) | Injected dose | Collected dose | Isolation time | Decay corrected dose | Radiochemical conversion (RCC) |
|-------------------------------------|-----------|-----------------------------------|---------------|----------------|----------------|----------------------|--------------------------------|
| 1                                   | <b>44</b> | 15.46 mCi                         | 419 μCi       | 68 μCi         | 26 min         | 80.1 μCi             | 19.1%                          |
| 2                                   |           | 10.42 mCi                         | 781 μCi       | 99 μCi         | 23 min         | 114.5 μCi            | 14.7%                          |
| 3                                   |           | 13.22 mCi                         | 604 μCi       | 102 μCi        | 23 min         | 117.9 μCi            | 19.5%                          |
| Average RCC: <b>17.8±2.2%</b> (n=3) |           |                                   |               |                |                |                      |                                |

Supplementary Table 46. HPLC-isolated RCCs of **44-<sup>18</sup>F**

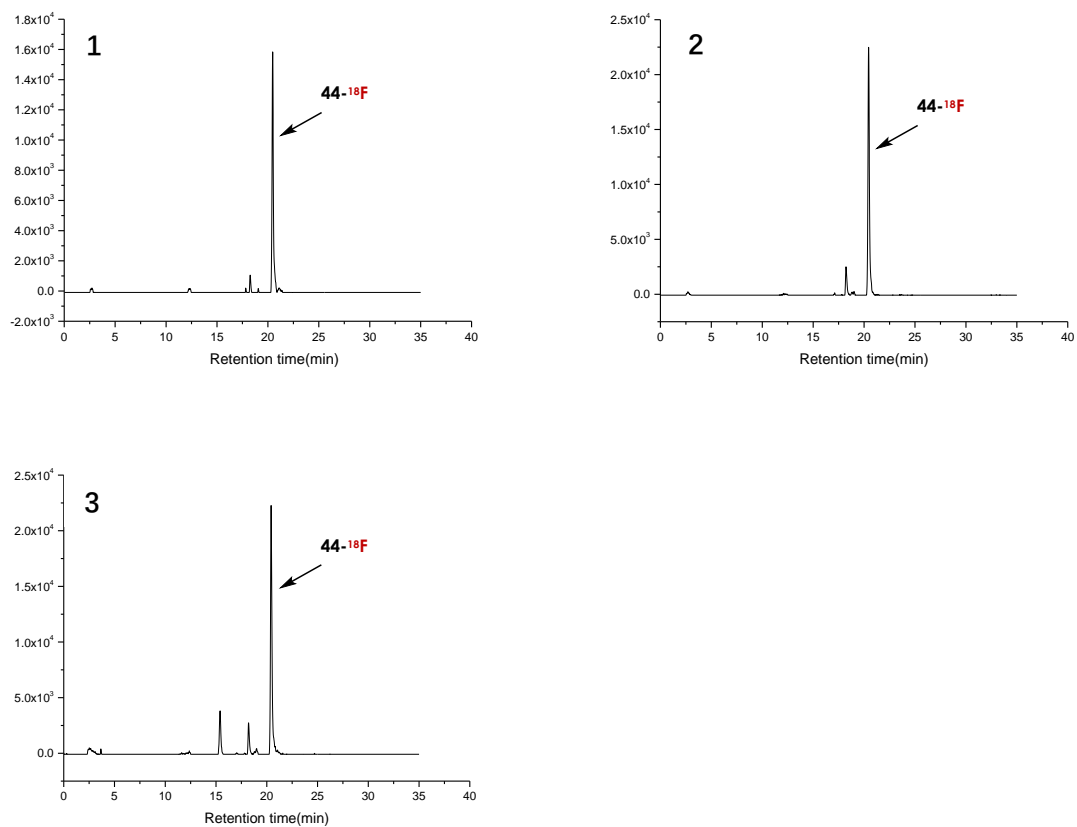

Supplementary Figure 84. Crude radio-HPLC traces from **44** to **44-<sup>18</sup>F**

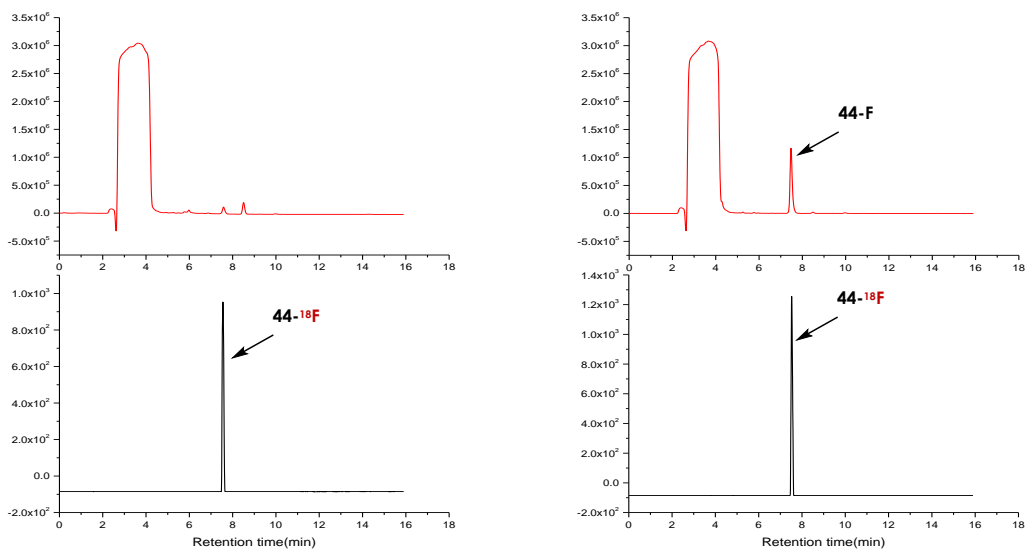

Supplementary Figure 85. Purification (left) and co-injection(right) for **44-<sup>18</sup>F**

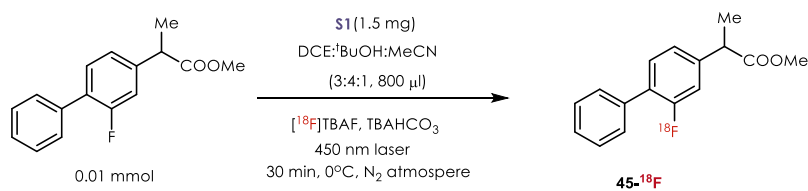

| Reaction | Substrate | Activity ([ <sup>18</sup> F]TBAF) | Injected dose | Collected dose | Isolation time | Decay corrected dose | Radiochemical conversion (RCC) |
|----------|-----------|-----------------------------------|---------------|----------------|----------------|----------------------|--------------------------------|
| 1        | 45        | 11.36 mCi                         | 545 µCi       | 79 µCi         | 20 min         | 89.6 µCi             | 16.4%                          |

Supplementary Table 47. HPLC-isolated RCC of **45-<sup>18</sup>F**

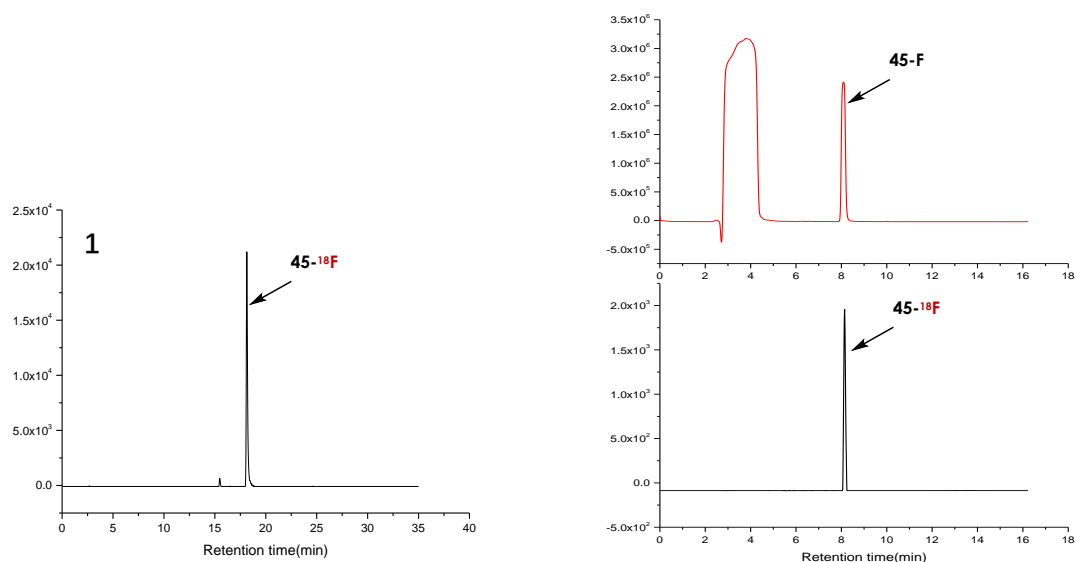

Supplementary Figure 86. Crude radio-HPLC trace(left) and Purification (right)of **45-<sup>18</sup>F**

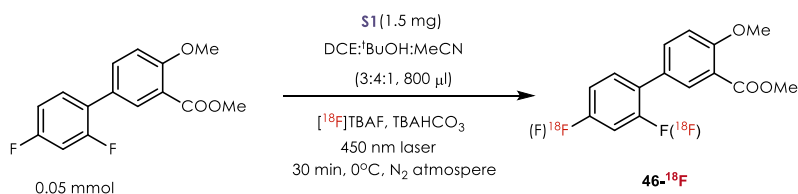

| Reaction | Substrate | Activity ([ <sup>18</sup> F]TBAF) | Injected dose | Collected dose | Isolation time | Decay corrected dose | Radiochemical conversion (RCC) |
|----------|-----------|-----------------------------------|---------------|----------------|----------------|----------------------|--------------------------------|
| 1        | 47        | 11.48 mCi                         | 665 µCi       | 59 µCi         | 20 min         | 66.9 µCi             | 10.1%                          |

Supplementary Table 48. HPLC-isolated RCC of **46-<sup>18</sup>F**

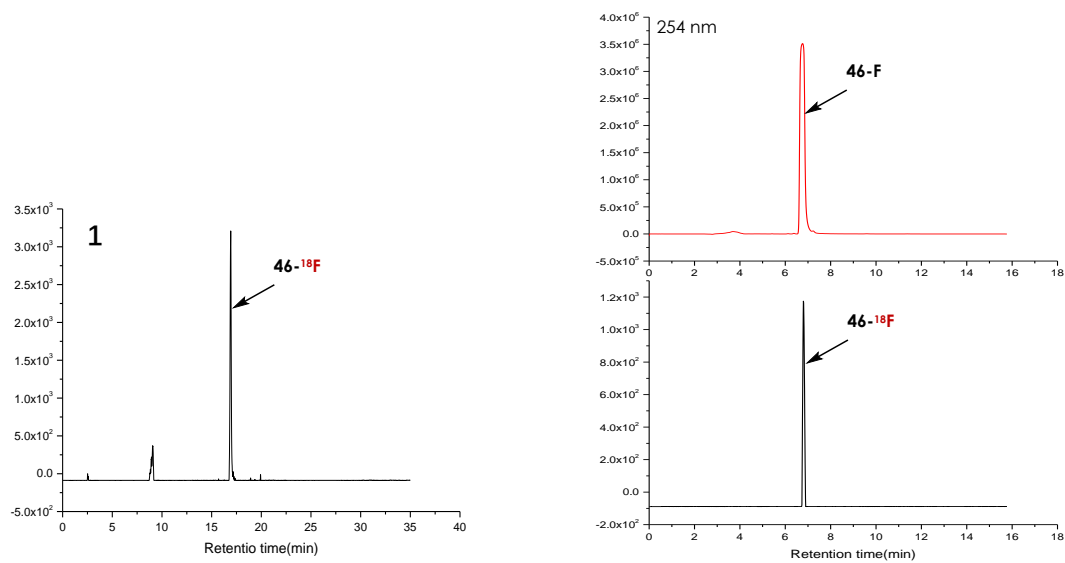

Supplementary Figure 87. Crude radio-HPLC trace(left) and purification (right) of **46-<sup>18</sup>F**

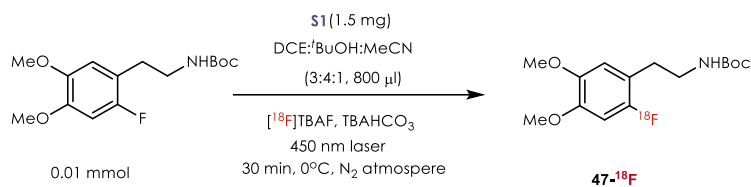

| Reaction       | Substrate           | Activity ([ <sup>18</sup> F]TBAF) | Injected dose | Collected dose | Isolation time | Decay corrected dose | Radiochemical conversion (RCC) |
|----------------|---------------------|-----------------------------------|---------------|----------------|----------------|----------------------|--------------------------------|
| 1              | <b>47-F</b> (X=F)   | 14.46 mCi                         | 984 μCi       | 632 μCi        | 18 min         | 708.1 μCi            | <b>72%</b>                     |
| 2 <sup>a</sup> | <b>47-Cl</b> (X=Cl) | 9.93 mCi                          | 317 μCi       | 11 μCi         | 18 min         | 12.3 μCi             | <b>3.9%</b>                    |

0.05 mmol substrate were used.

Supplementary Table 49. HPLC-isolated RCCs of **47-<sup>18</sup>F**

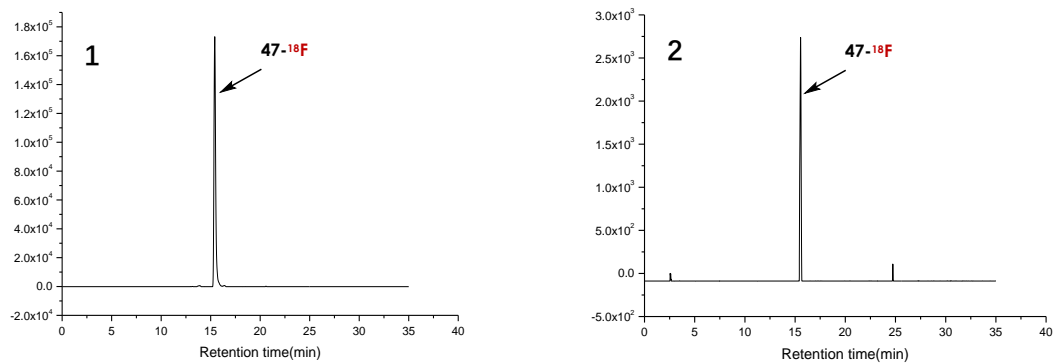

Supplementary Figure 88. Crude radio-HPLC traces from **48-F** and **48-Cl** to **47-<sup>18</sup>F**

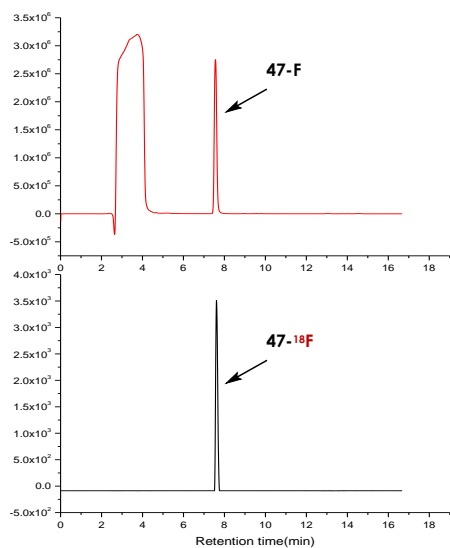

Supplementary Figure 89. Purification of **47-<sup>18</sup>F**

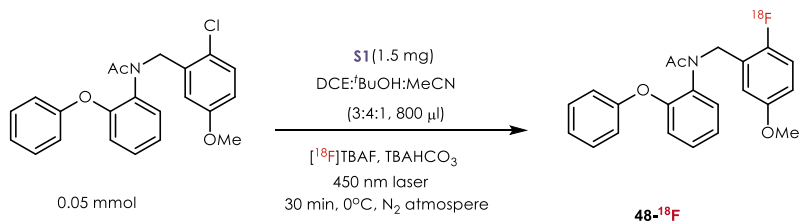

| Reaction                                           | Substrate | Activity ([ <sup>18</sup> F]TBAF) | Injected dose | Collected dose | Isolation time | Decay corrected dose | Radiochemical conversion (RCC) |
|----------------------------------------------------|-----------|-----------------------------------|---------------|----------------|----------------|----------------------|--------------------------------|
| 1                                                  | <b>48</b> | 19.6 mCi                          | 483 $\mu$ Ci  | 62 $\mu$ Ci    | 20 min         | 70.3 $\mu$ Ci        | 14.6%                          |
| 2                                                  |           | 47.7 mCi                          | 1306 $\mu$ Ci | 203 $\mu$ Ci   | 21 min         | 231.8 $\mu$ Ci       | 17.7%                          |
| 3                                                  |           | 48.4 mCi                          | 662 $\mu$ Ci  | 145 $\mu$ Ci   | 20 min         | 164.5 $\mu$ Ci       | 24.9%                          |
| Average RCC: <b>19.1<math>\pm</math>4.3%</b> (n=3) |           |                                   |               |                |                |                      |                                |

Supplementary Table 50. HPLC-isolated RCCs of **48-<sup>18</sup>F**

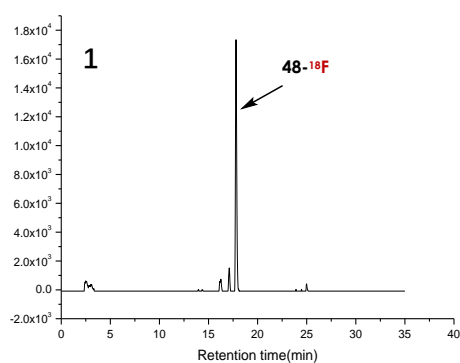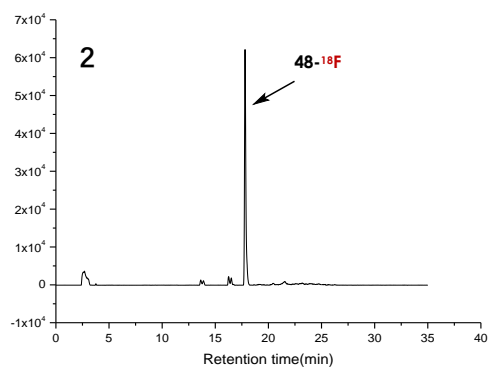

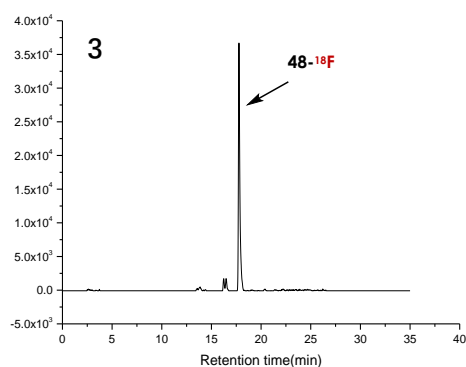

Supplementary Figure 90. Crude radio-HPLC traces from **48** to **48-<sup>18</sup>F**

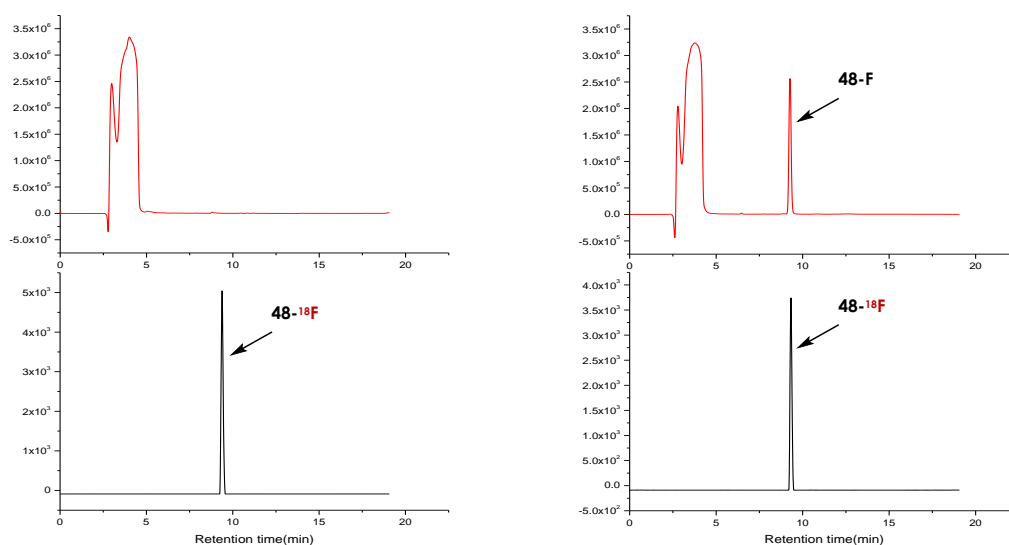

Supplementary Figure 91. Purification (left) and co-injection (right) for **48-<sup>18</sup>F**

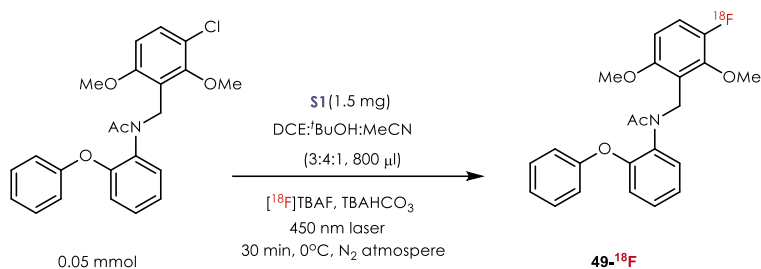

| Reaction | Substrate | Activity ( $[^{18}\text{F}]\text{TBAF}$ ) | Injected dose       | Collected dose     | Isolation time | Decay corrected dose | Radiochemical conversion (RCC) |
|----------|-----------|-------------------------------------------|---------------------|--------------------|----------------|----------------------|--------------------------------|
| 1        |           | 9.89 mCi                                  | 452 $\mu\text{Ci}$  | 165 $\mu\text{Ci}$ | 21 min         | 188.4 $\mu\text{Ci}$ | 41.7%                          |
| 2        | <b>49</b> | 10.63 mCi                                 | 979 $\mu\text{Ci}$  | 318 $\mu\text{Ci}$ | 21 min         | 363.1 $\mu\text{Ci}$ | 37.1%                          |
| 3        |           | 11.90 mCi                                 | 1161 $\mu\text{Ci}$ | 542 $\mu\text{Ci}$ | 20 min         | 615 $\mu\text{Ci}$   | 53%                            |

Average RCY (decay-corrected): **43.9±6.6%** (n=3)

Supplementary Table 51. HPLC-isolated RCYs of **49-<sup>18</sup>F**

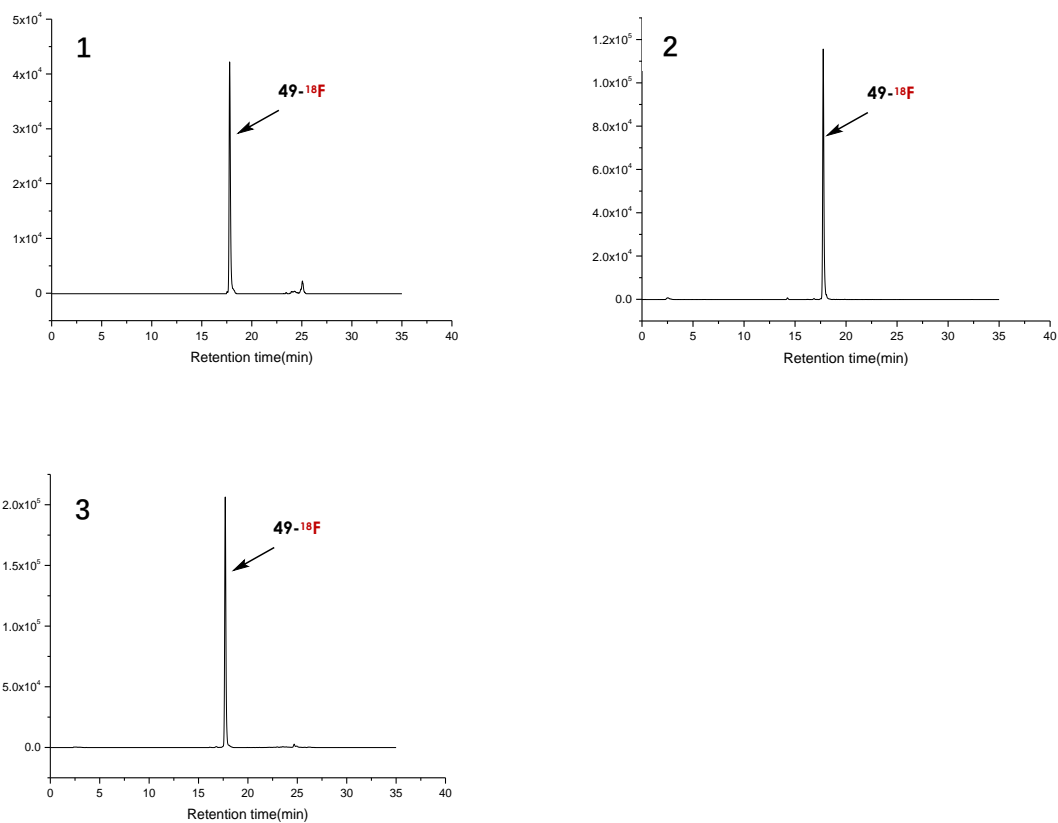

Supplementary Figure 92. Crude radio-HPLC traces from **49** to **49-<sup>18</sup>F**

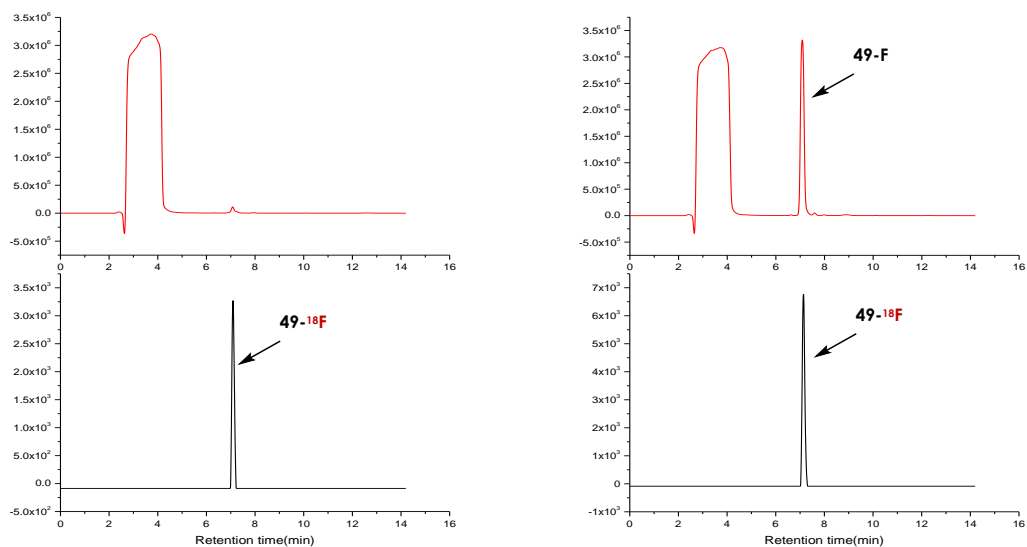

Supplementary Figure 93. Purification (left) and co-injection(right) for **49-<sup>18</sup>F**

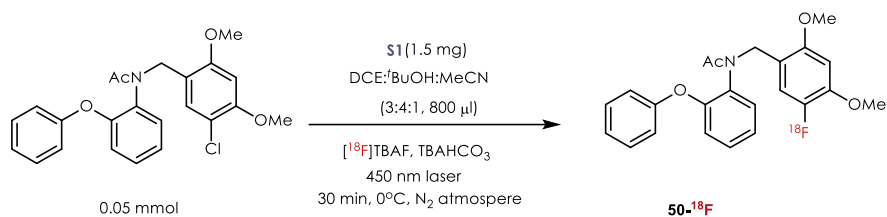

| Reaction | Substrate | Activity ([ $^{18}\text{F}$ ]TBAF) | Injected dose      | Collected dose    | Isolation time | Decay corrected dose | Radiochemical conversion (RCC) |
|----------|-----------|------------------------------------|--------------------|-------------------|----------------|----------------------|--------------------------------|
| 1        |           | 15.59 mCi                          | 409 $\mu\text{Ci}$ | 33 $\mu\text{Ci}$ | 21 min         | 37.7 $\mu\text{Ci}$  | 9.2%                           |
| 2        | 50        | 11.67 mCi                          | 617 $\mu\text{Ci}$ | 75 $\mu\text{Ci}$ | 21 min         | 85.6 $\mu\text{Ci}$  | 13.9%                          |
| 3        |           | 10.46 mCi                          | 465 $\mu\text{Ci}$ | 35 $\mu\text{Ci}$ | 21 min         | 40 $\mu\text{Ci}$    | 8.6%                           |

Average RCC:  $10.6 \pm 2.4\%$  (n=3)

Supplementary Table 52. HPLC-isolated RCCs of  $^{18}\text{F}$ -50

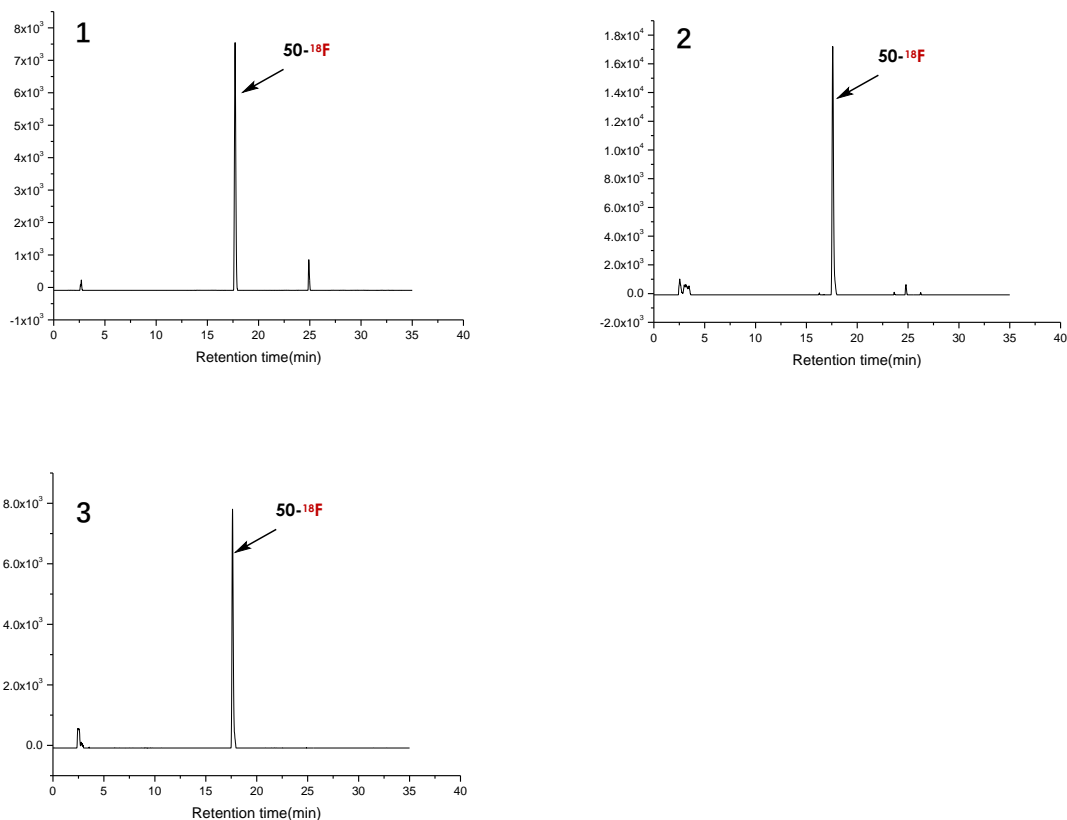

Supplementary Figure 94. Crude radio-HPLC traces from 50 to  $^{18}\text{F}$ -50



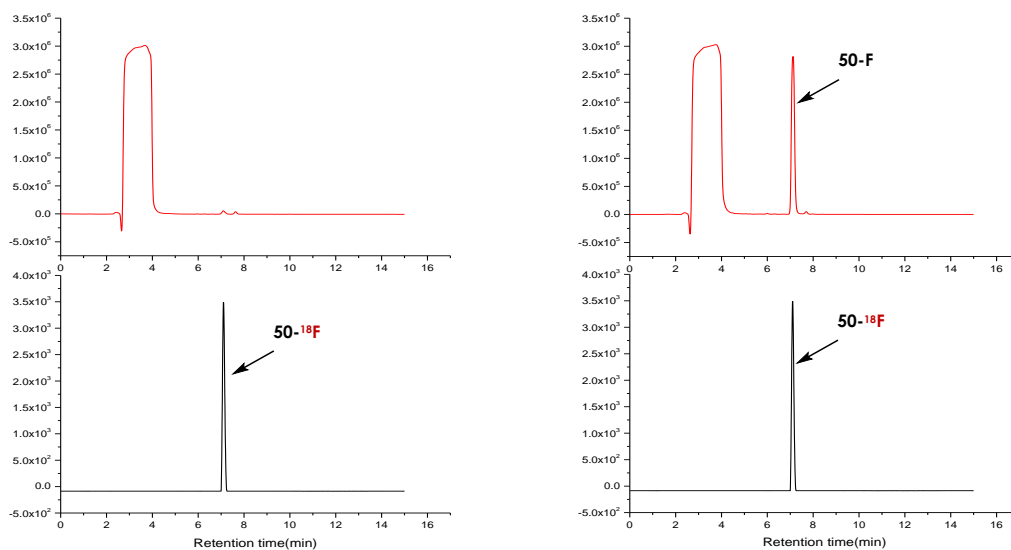

**Supplementary Figure 95.** Purification (left) and co-injection (right) for **50-<sup>18</sup>F**

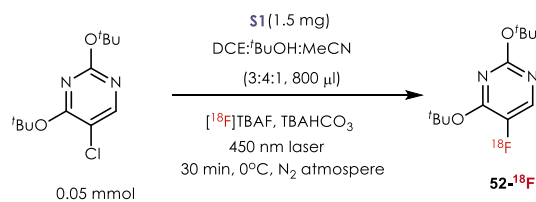

| Reaction                            | Substrate | Activity ([ <sup>18</sup> F]TBAF) | Injected dose | Collected dose | Isolation time | Decay corrected dose | Radiochemical conversion (RCC) |
|-------------------------------------|-----------|-----------------------------------|---------------|----------------|----------------|----------------------|--------------------------------|
| 1                                   | <b>51</b> | 17.95 mCi                         | 455 μCi       | 235 μCi        | 13 min         | 255.1 μCi            | 56.1%                          |
| 2                                   |           | 6.09 mCi                          | 337 μCi       | 203 μCi        | 12 min         | 219 μCi              | 65%                            |
| 3                                   |           | 5.7 mCi                           | 425 μCi       | 198 μCi        | 13 min         | 214.9 μCi            | 50.6%                          |
| 4                                   |           | 26.4 mCi                          | 1082 μCi      | 558 μCi        | 14 min         | 609.6 μCi            | 56.3%                          |
| Average RCC: <b>57.0±5.2%</b> (n=4) |           |                                   |               |                |                |                      |                                |

**Supplementary Table 53.** HPLC-isolated RCCs of **52-<sup>18</sup>F**

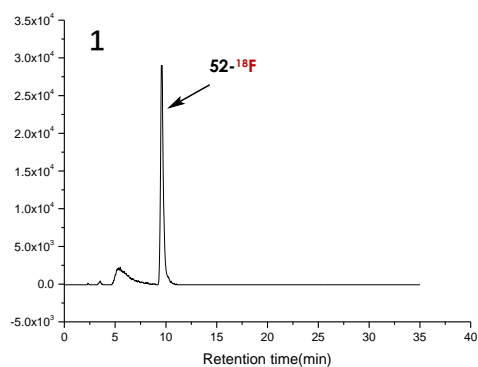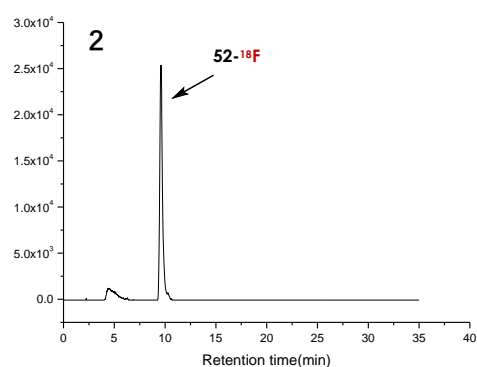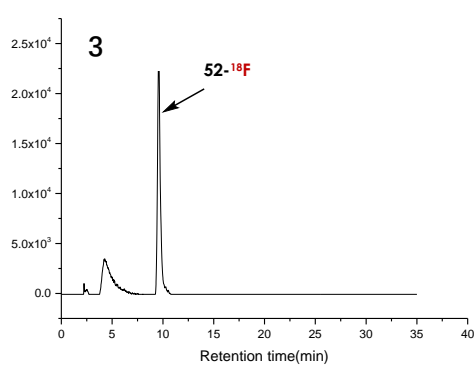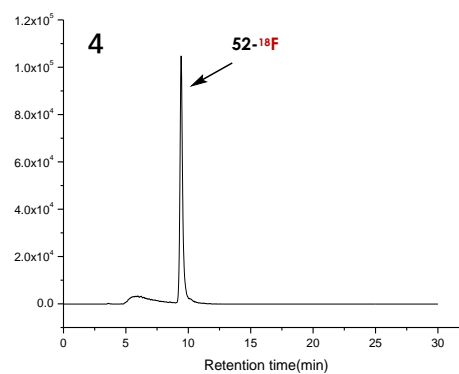

**Supplementary Figure 96.** Crude radio-HPLC traces from **52** to **52-<sup>18</sup>F**

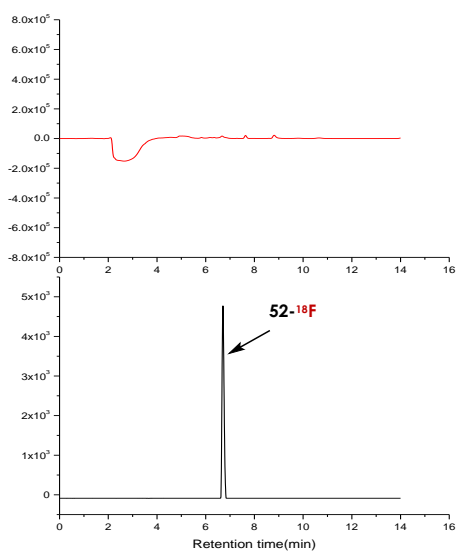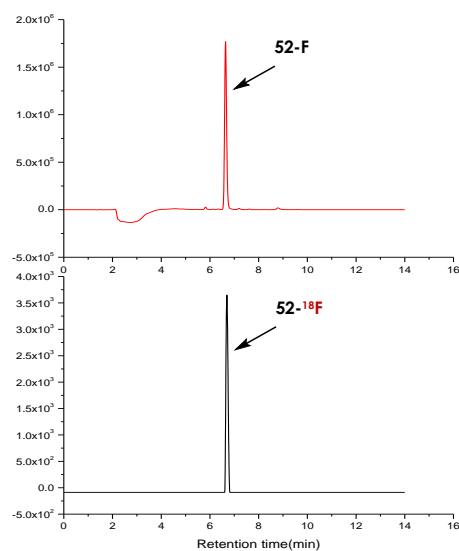

**Supplementary Figure 97.** Purification (left) and co-injection(right) for **52-<sup>18</sup>F**

**Deprotection of 52-<sup>18</sup>F to 53-<sup>18</sup>F ([<sup>18</sup>F]fluoroursail)**



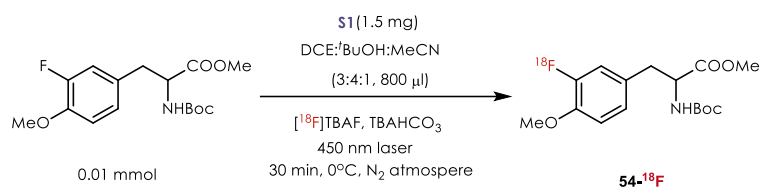

| Reaction | Substrate | Activity ([ <sup>18</sup> F]TBAF) | Injected dose | Collected dose | Isolation time | Decay corrected dose | Radiochemical conversion (RCC) |
|----------|-----------|-----------------------------------|---------------|----------------|----------------|----------------------|--------------------------------|
| 1        | 54        | 13.59 mCi                         | 593 μCi       | 206 μCi        | 19 min         | 232.3 μCi            | 39.2%                          |

Supplementary Table 55. HPLC-isolated RCC of 54-<sup>18</sup>F

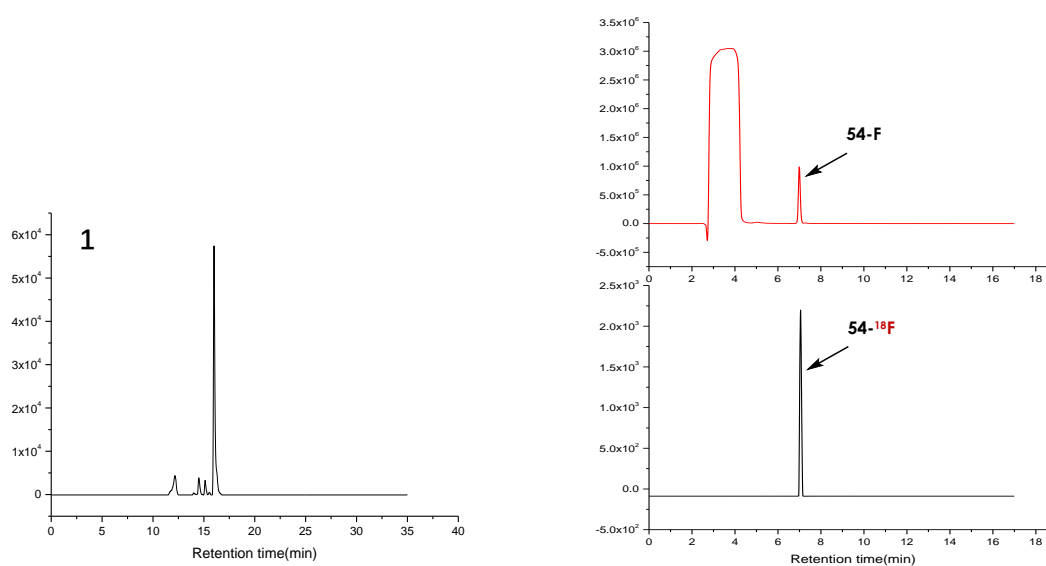

Supplementary Figure 100. Crude radio-HPLC trace(left) and purification (right) of 54-<sup>18</sup>F

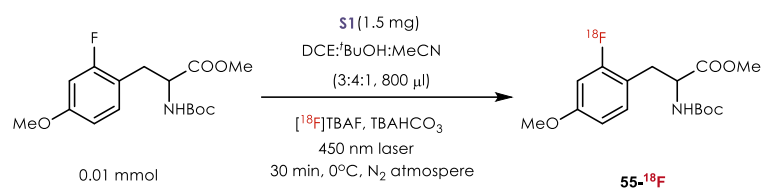

| Reaction | Substrate | Activity ([ <sup>18</sup> F]TBAF) | Injected dose | Collected dose | Isolation time | Decay corrected dose | Radiochemical conversion (RCC) |
|----------|-----------|-----------------------------------|---------------|----------------|----------------|----------------------|--------------------------------|
| 1        | 55        | 9.83 mCi                          | 696 μCi       | 78 μCi         | 20 min         | 88.5 μCi             | 12.7%                          |

Supplementary Table 56. HPLC-isolated RCC of 55-<sup>18</sup>F

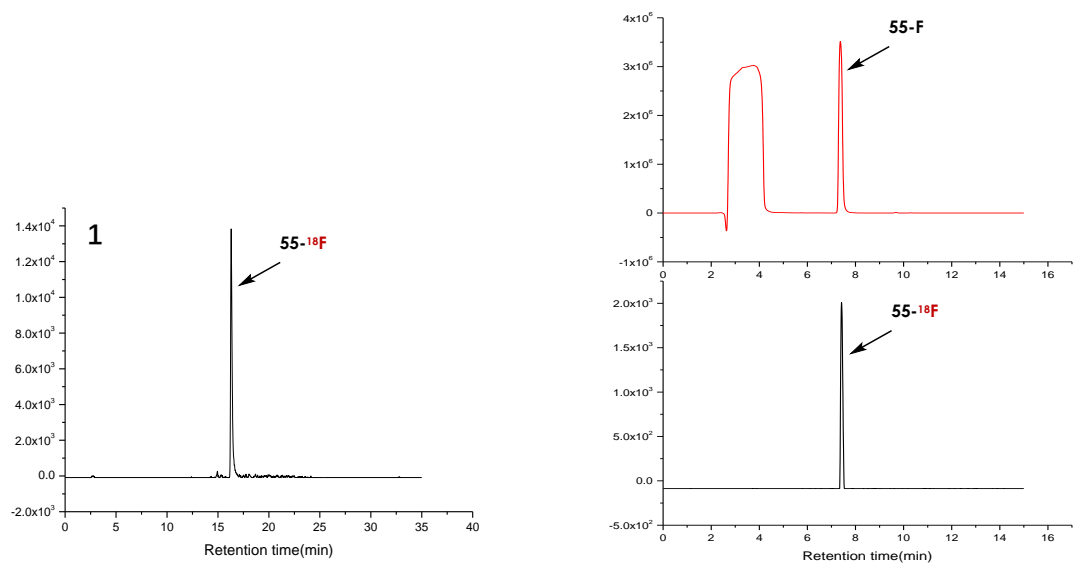

Supplementary Figure 101. Crude radio-HPLC trace(left) and purification (right) of **57-<sup>18</sup>F**

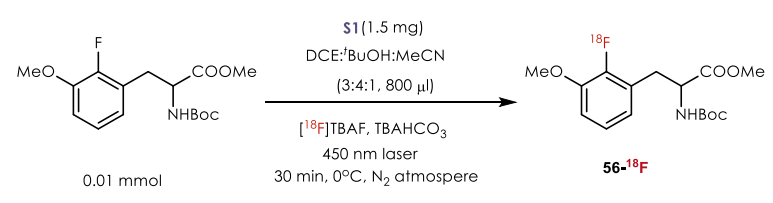

| Reaction | Substrate | Activity ([ <sup>18</sup> F]TBAF) | Injected dose | Collected dose | Isolation time | Decay corrected dose | Radiochemical conversion (RCC) |
|----------|-----------|-----------------------------------|---------------|----------------|----------------|----------------------|--------------------------------|
| 1        | 56        | 5.57 mCi                          | 512 $\mu$ Ci  | 356 $\mu$ Ci   | 19 min         | 401.4 $\mu$ Ci       | 78.4%                          |

Supplementary Table 57. HPLC-isolated RCC of **56-<sup>18</sup>F**

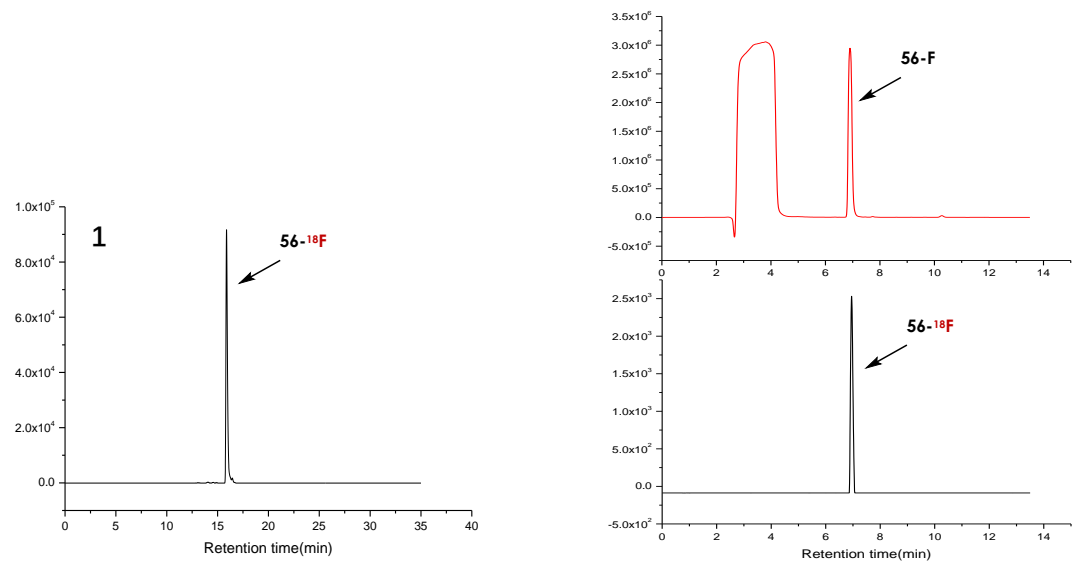

Supplementary Figure 102. Crude radio-HPLC trace(left) and purification (right) of **56-<sup>18</sup>F**

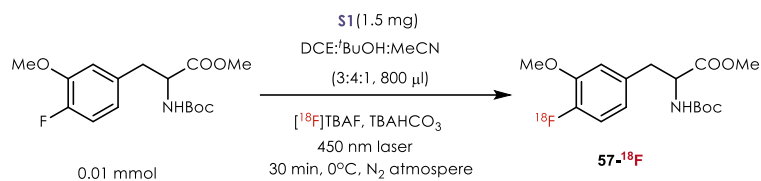

| Reaction | Substrate | Activity ([ <sup>18</sup> F]TBAF) | Injected dose | Collected dose | Isolation time | Decay corrected dose | Radiochemical conversion (RCC) |
|----------|-----------|-----------------------------------|---------------|----------------|----------------|----------------------|--------------------------------|
| 1        | 57        | 12.08 mCi                         | 560 μCi       | 376 μCi        | 18 min         | 421.3 μCi            | 75.2%                          |

Supplementary Table 58. HPLC-isolated RCC of **57-<sup>18</sup>F**

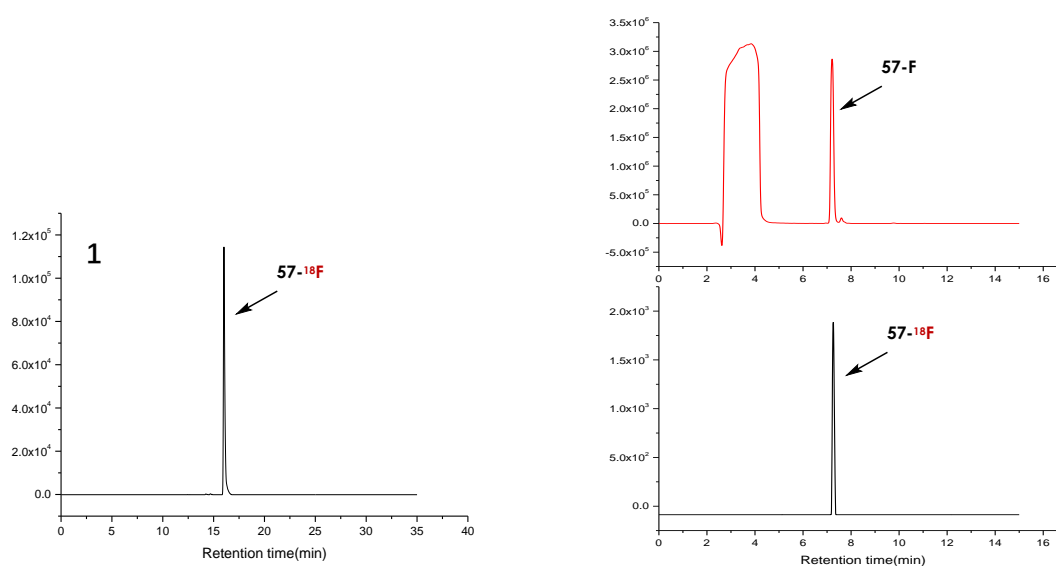

Supplementary Figure 103. Crude radio-HPLC trace (left) and purification (right) of **57-<sup>18</sup>F**

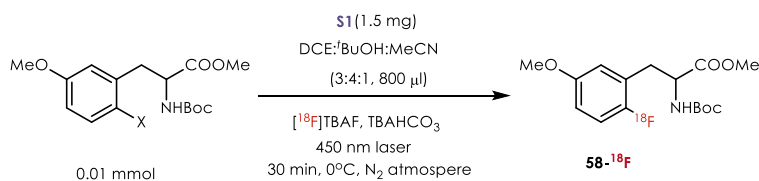

| Reaction | Substrate                 | Activity ([ <sup>18</sup> F]TBAF) | Injected dose | Collected dose | Isolation time | Decay corrected dose | Radiochemical conversion (RCC) |
|----------|---------------------------|-----------------------------------|---------------|----------------|----------------|----------------------|--------------------------------|
| 1        | 58-F (X=F)                | 11.95 mCi                         | 998 μCi       | 675 μCi        | 20 min         | 765.9 μCi            | 76.7%                          |
| 2        | 58-Cl (X=Cl) <sup>a</sup> | 9.54 mCi                          | 890 μCi       | 290 μCi        | 19 min         | 327 μCi              | 36.7%                          |

<sup>a</sup>0.05 mmol substrate.

Supplementary Table 59. HPLC-isolated RCCs of **58-<sup>18</sup>F**

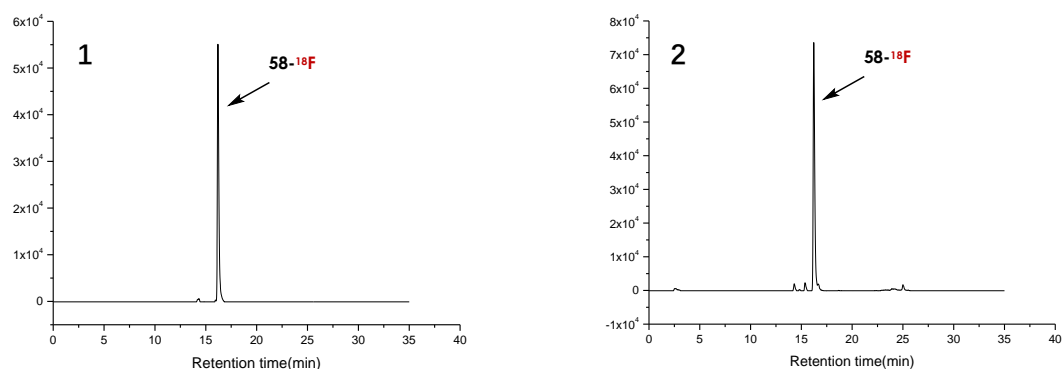

Supplementary Figure 104. Crude radio-HPLC traces from **58-F** and **58-Cl** to **58-<sup>18</sup>F**

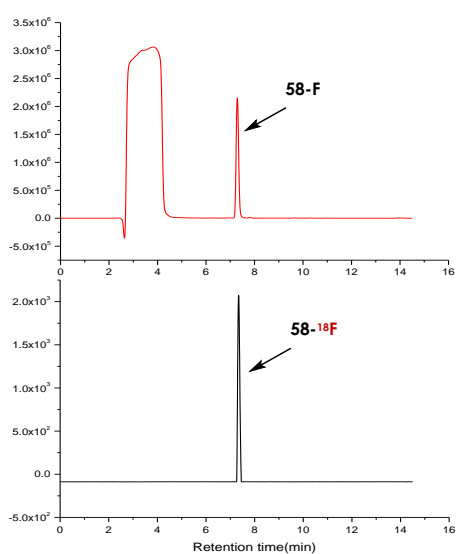

Supplementary Figure 105. HPLC traces of purification of **58-<sup>18</sup>F** from reaction 1.

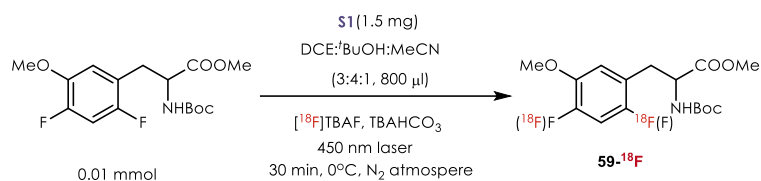

| Reaction | Substrate | Activity ([ <sup>18</sup> F]TBAF) | Injected dose | Collected dose | Isolation time | Decay corrected dose | Radiochemical conversion (RCC) |
|----------|-----------|-----------------------------------|---------------|----------------|----------------|----------------------|--------------------------------|
| 1        | 59        | 5.95 mCi                          | 495 μCi       | 367 μCi        | 20 min         | 416.4 μCi            | 84.1%                          |

Supplementary Table 60. HPLC-isolated RCC of **59-<sup>18</sup>F**

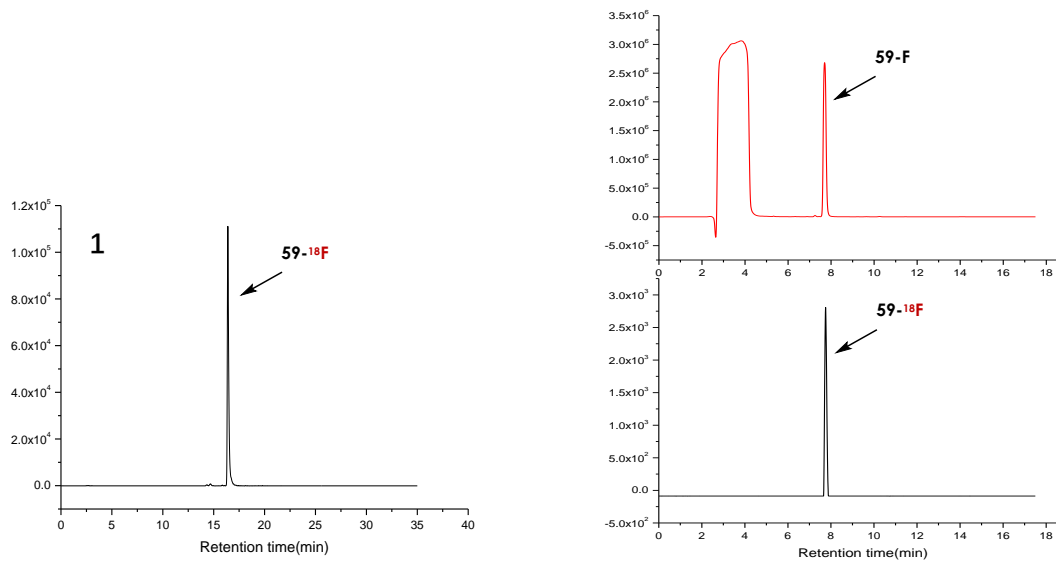

Supplementary Figure 106. Crude radio-HPLC trace(left) and purification (right) of **59-<sup>18</sup>F**

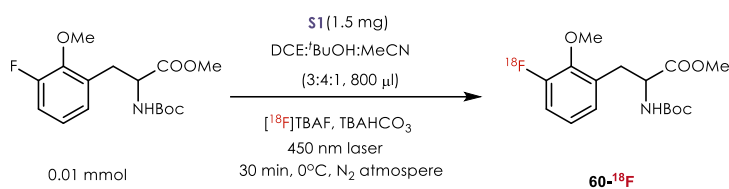

| Reaction | Substrate | Activity ([ <sup>18</sup> F]TBAF) | Injected dose | Collected dose | Isolation time | Decay corrected dose | Radiochemical conversion (RCC) |
|----------|-----------|-----------------------------------|---------------|----------------|----------------|----------------------|--------------------------------|
| 1        | 60        | 7.69 mCi                          | 612 $\mu$ Ci  | 207 $\mu$ Ci   | 19 min         | 233.4 $\mu$ Ci       | 38.1%                          |

Supplementary Table 61. HPLC-isolated RCC of **60-<sup>18</sup>F**

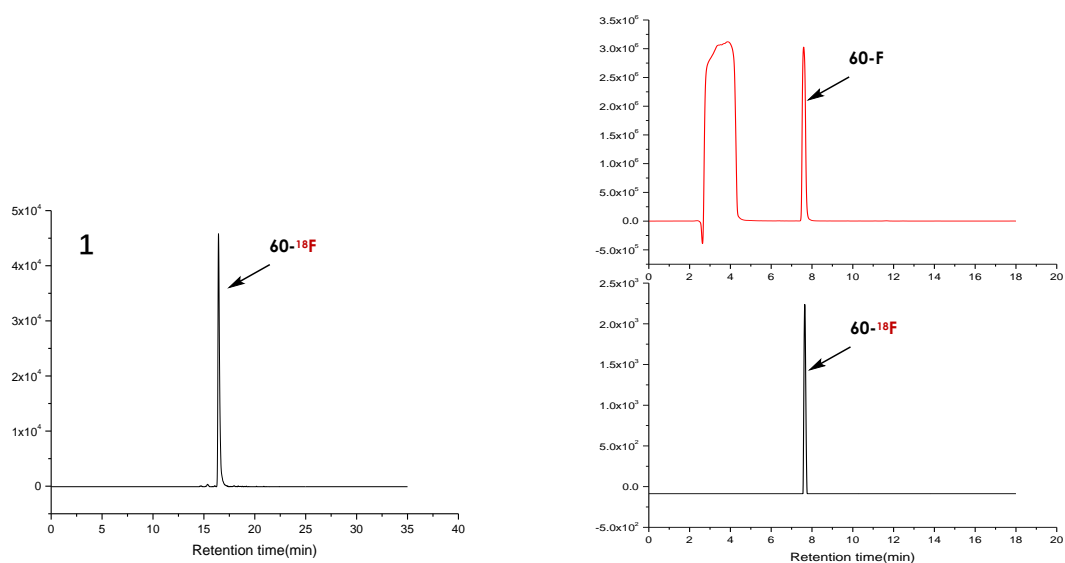

Supplementary Figure 107. Crude radio-HPLC trace(left) and purification (right) of **60-<sup>18</sup>F**



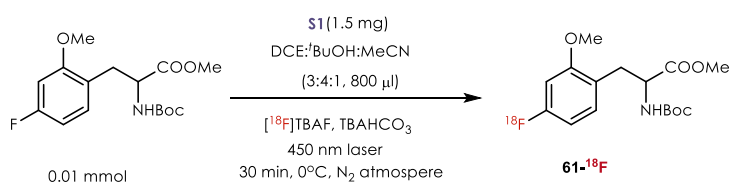

| Reaction | Substrate | Activity ([ $^{18}$ F]TBAF) | Injected dose | Collected dose | Isolation time | Decay corrected dose | Radiochemical conversion (RCC) |
|----------|-----------|-----------------------------|---------------|----------------|----------------|----------------------|--------------------------------|
| 1        | 61        | 6.47 mCi                    | 577 $\mu$ Ci  | 124 $\mu$ Ci   | 19 min         | 139.8 $\mu$ Ci       | 24.2%                          |

Supplementary Table 62. HPLC-isolated RCC of **61- $^{18}$ F**

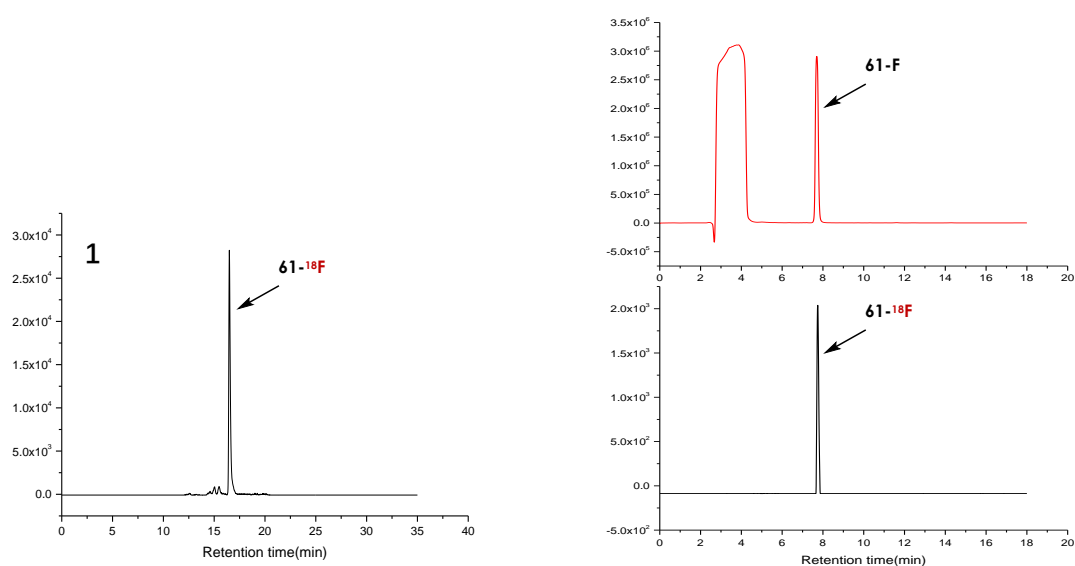

Supplementary Figure 108. Crude radio-HPLC trace(left) and purification (right) of **61- $^{18}$ F**

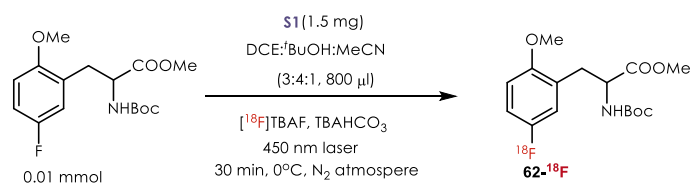

| Reaction | Substrate | Activity ([ $^{18}$ F]TBAF) | Injected dose | Collected dose | Isolation time | Decay corrected dose | Radiochemical conversion (RCC) |
|----------|-----------|-----------------------------|---------------|----------------|----------------|----------------------|--------------------------------|
| 1        | 62        | 8.05 mCi                    | 550 $\mu$ Ci  | 389 $\mu$ Ci   | 20 min         | 441.4 $\mu$ Ci       | 80.2%                          |

Supplementary Table 63. HPLC-isolated RCC of **62- $^{18}$ F**

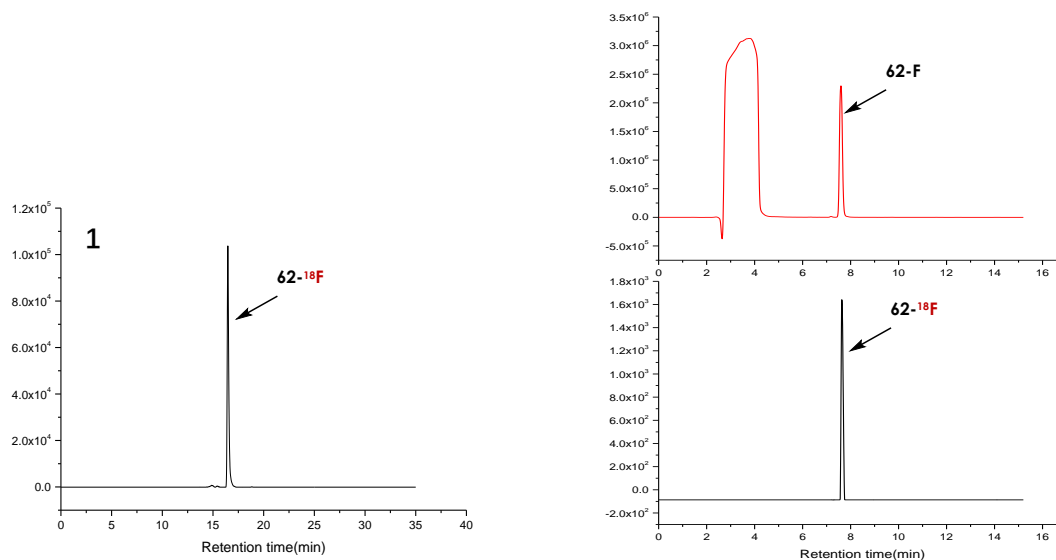

Supplementary Figure 109. Crude radio-HPLC trace(left) and Purification (right) of **62-<sup>18</sup>F**

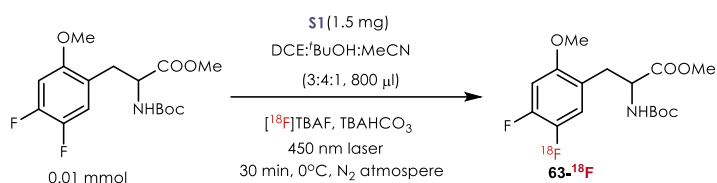

| Reaction | Substrate | Activity ([ <sup>18</sup> F]TBAF) | Injected dose       | Collected dose     | Isolation time | Decay corrected dose | Radiochemical conversion (RCC) |
|----------|-----------|-----------------------------------|---------------------|--------------------|----------------|----------------------|--------------------------------|
| 1        | 63        | 31.4 mCi                          | 2009 $\mu\text{Ci}$ | 328 $\mu\text{Ci}$ | 20 min         | 372.2 $\mu\text{Ci}$ | 18.5%                          |

Supplementary Table 64. HPLC-isolated RCC of **63-<sup>18</sup>F**

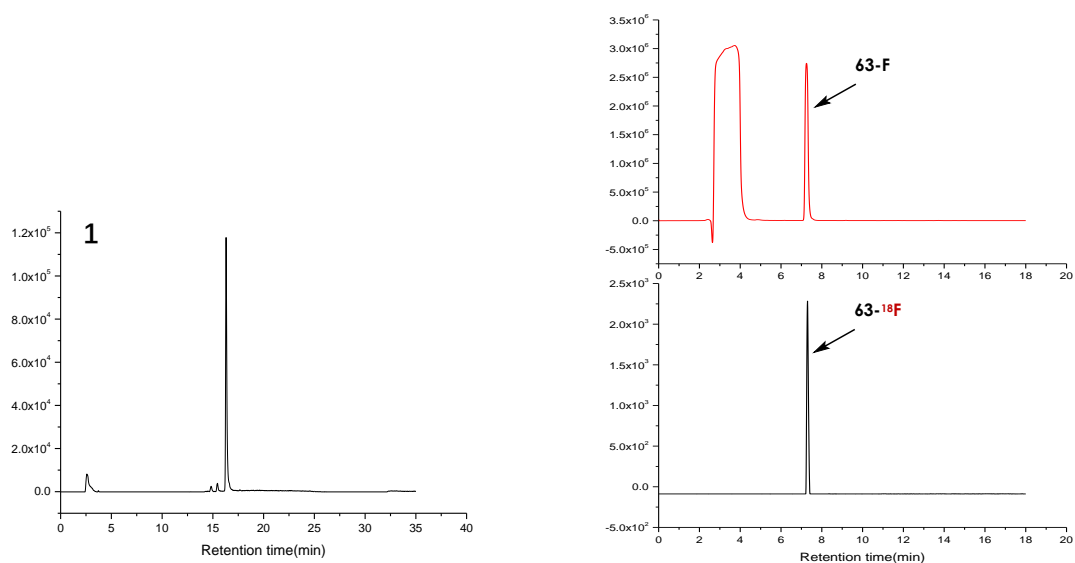

Supplementary Figure 110. Crude radio-HPLC trace(left) and purification (right) of **63-<sup>18</sup>F**

### 3.6 General procedure for deprotection of $^{18}\text{F}$ -labeled tyrosine derivatives

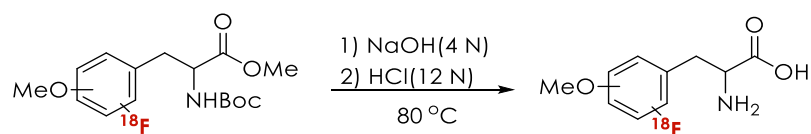

The  $^{18}\text{F}$ -fluorinated tyrosine derivatives (**54- $^{18}\text{F}$**  to **63- $^{18}\text{F}$** ) from the  $^{19}\text{F}/^{18}\text{F}$  isotopic exchange reactions were isolated on radio-HPLC and directly transferred into a 5 ml V-vial. 200  $\mu\text{l}$  of 4N NaOH solution was added to the vial. The V-vial was then sealed with a Teflon-lined septum screw cap equipped with a vent needle. The solution was heated at 80°C with a positive argon flow for 5 min. Argon flow was then stopped and the vent needle was removed. 300  $\mu\text{l}$  of concentrated HCl was then added via a syringe and the solution was kept at 80°C for 2 min. The solution was diluted with DI  $\text{H}_2\text{O}$  before being analyzed and purified on HPLC. The  $^{18}\text{F}$ -fluorinated tyrosines were collected and the acetonitrile from the mobile phase was removed under reduced pressure. The resulting water solution was neutralized to pH 7 by adding NaOH (1N) and phosphate-buffered saline (PBS, 10X). The tracers were eventually reformulated in a 1X PBS solution for use in the following PET imaging studies.

Note: For compound **D-64- $^{18}\text{F}$**  and **L-64- $^{18}\text{F}$** , 200  $\mu\text{l}$  con. HCl (12 N) was employed only for the deprotection under 120°C for 10 min. to avoid potential racemization.

#### HPLC condition:

Column: Phenomenex, Kinetex® 5  $\mu\text{m}$  EVO C18 100 Å, 250 x 4.6 mm LC Column. Solvent A: 0.1%TFA water; Solvent B: 0.1%TFA acetonitrile. Isocratic elution at 10% solvent B. Flow rate: 1 mL/min.

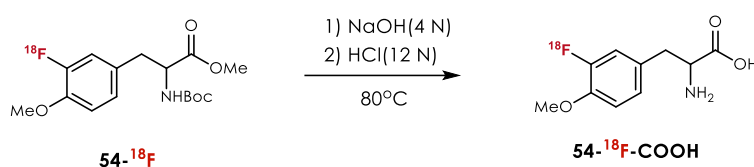

| Tracer                                    | Activity ( <b>54-<math>^{18}\text{F}</math></b> ) | Injected dose      | Collected dose                       | Isolation time | Decay corrected      | Radiochemical conversion (RCC) |
|-------------------------------------------|---------------------------------------------------|--------------------|--------------------------------------|----------------|----------------------|--------------------------------|
| <b>54-<math>^{18}\text{F}</math>-COOH</b> | 948 $\mu\text{Ci}$                                | 815 $\mu\text{Ci}$ | <b>619 <math>\mu\text{Ci}</math></b> | 11 min         | 663.5 $\mu\text{Ci}$ | <b>81.4%</b>                   |

**Supplementary Table 65.** HPLC-isolated RCC of **54- $^{18}\text{F}$ -COOH**

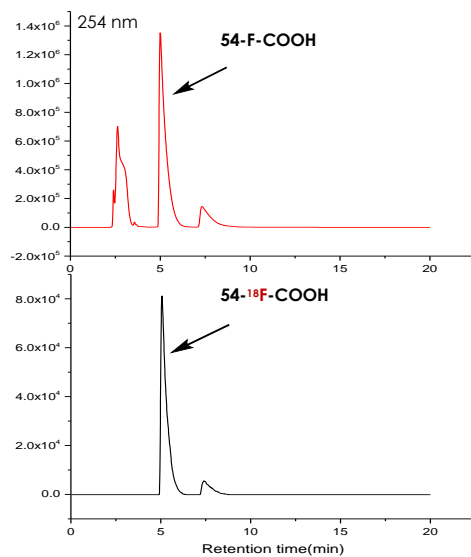

Supplementary Figure 111. HPLC trace of isolation of **54-<sup>18</sup>F-COOH**

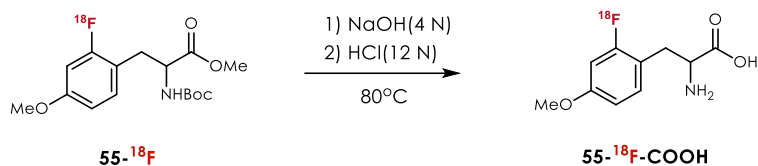

| Tracer                        | Activity<br>( <b>55-<sup>18</sup>F</b> ) | Injected<br>dose | Collected<br>dose | Isolation<br>time | Decay<br>corrected | Radiochemical<br>conversion<br>(RCC) |
|-------------------------------|------------------------------------------|------------------|-------------------|-------------------|--------------------|--------------------------------------|
| <b>55-<sup>18</sup>F-COOH</b> | 1.15 mCi                                 | 826 μCi          | 751 μCi           | 9 min             | 794.9 μCi          | <b>96.2%</b>                         |

Supplementary Table 66. HPLC-isolated RCC of **55-<sup>18</sup>F-COOH**

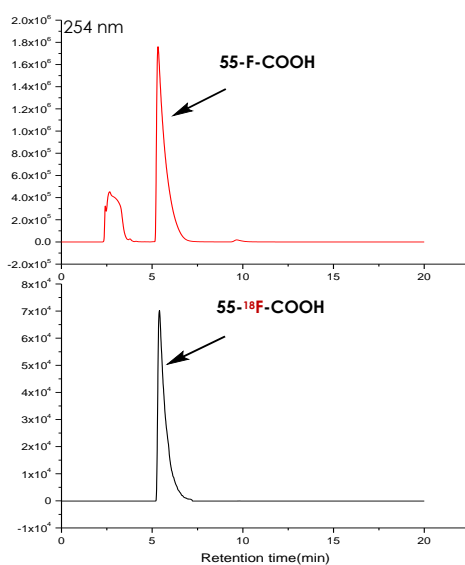

Supplementary Figure 112. HPLC trace of isolation of **55-<sup>18</sup>F-COOH**

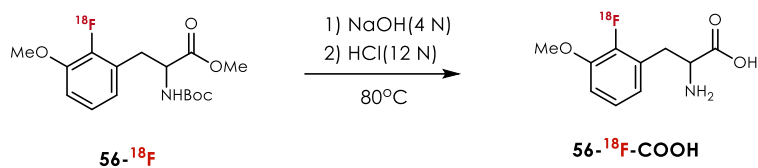

| Tracer                        | Activity ( <b>56-<sup>18</sup>F</b> ) | Injected dose | Collected dose   | Isolation time | Decay corrected | Radiochemical conversion (RCC) |
|-------------------------------|---------------------------------------|---------------|------------------|----------------|-----------------|--------------------------------|
| <b>56-<sup>18</sup>F-COOH</b> | 2.04 mCi                              | 1 678 μCi     | <b>1 534 μCi</b> | 10 min         | 1 634 μCi       | <b>97.4%</b>                   |

**Supplementary Table 67.** HPLC-isolated RCC of **56-<sup>18</sup>F-COOH**

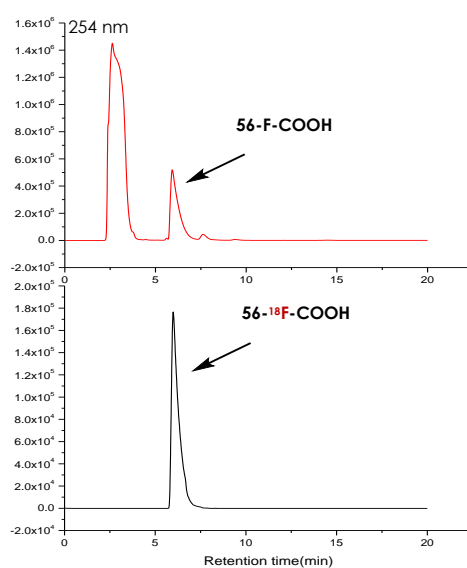

**Supplementary Figure 113.** HPLC trace of isolation of **56-<sup>18</sup>F-COOH**

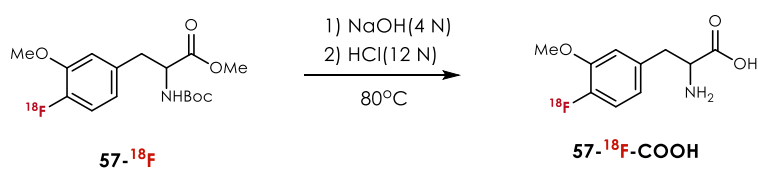

| Tracer                        | Activity ( <b>57-<sup>18</sup>F</b> ) | Injected dose | Collected dose   | Isolation time | Decay corrected | Radiochemical conversion (RCC) |
|-------------------------------|---------------------------------------|---------------|------------------|----------------|-----------------|--------------------------------|
| <b>57-<sup>18</sup>F-COOH</b> | 2.0 mCi                               | 1 675 μCi     | <b>1 536 μCi</b> | 10 min         | 1 636.1 μCi     | <b>97.7%</b>                   |

**Supplementary Table 68.** HPLC-isolated RCC of **57-<sup>18</sup>F-COOH**



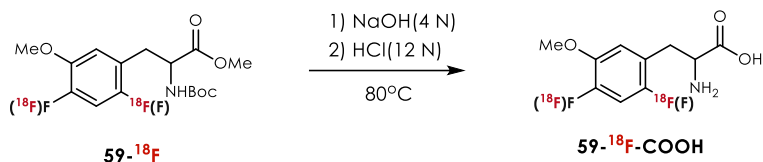

| Tracer                        | Activity ( <b>59-<sup>18</sup>F</b> ) | Injected dose       | Collected dose                        | Isolation time | Decay corrected       | Radiochemical conversion (RCC) |
|-------------------------------|---------------------------------------|---------------------|---------------------------------------|----------------|-----------------------|--------------------------------|
| <b>59-<sup>18</sup>F-COOH</b> | 1.721 mCi                             | 1434 $\mu\text{Ci}$ | <b>1323 <math>\mu\text{Ci}</math></b> | 10 min         | 1409.2 $\mu\text{Ci}$ | <b>98.3%</b>                   |

Supplementary Table 70. HPLC-isolated RCC of **59-<sup>18</sup>F-COOH**

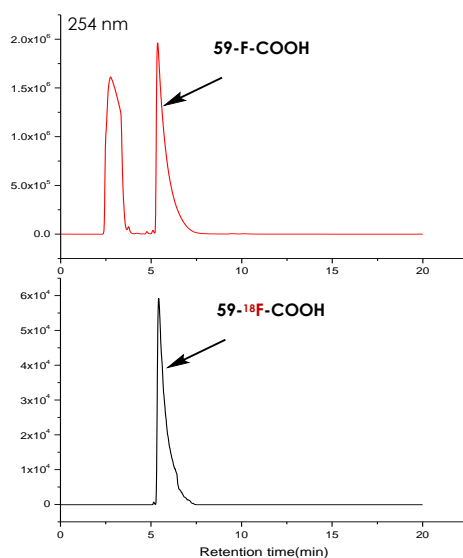

Supplementary Figure 116. HPLC trace of isolation of **59-<sup>18</sup>F-COOH**

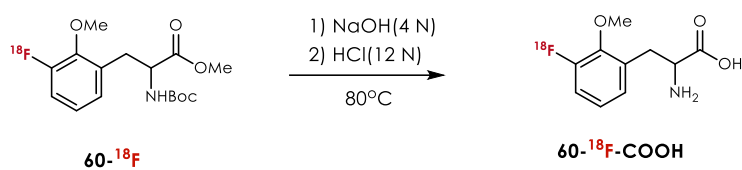

| Tracer                        | Activity ( <b>60-<sup>18</sup>F</b> ) | Injected dose      | Collected dose                       | Isolation time | Decay corrected      | Radiochemical conversion (RCC) |
|-------------------------------|---------------------------------------|--------------------|--------------------------------------|----------------|----------------------|--------------------------------|
| <b>60-<sup>18</sup>F-COOH</b> | 965 $\mu\text{Ci}$                    | 787 $\mu\text{Ci}$ | <b>688 <math>\mu\text{Ci}</math></b> | 8 min          | 723.6 $\mu\text{Ci}$ | <b>92%</b>                     |

Supplementary Table 71. HPLC-isolated RCC of **60-<sup>18</sup>F-COOH**

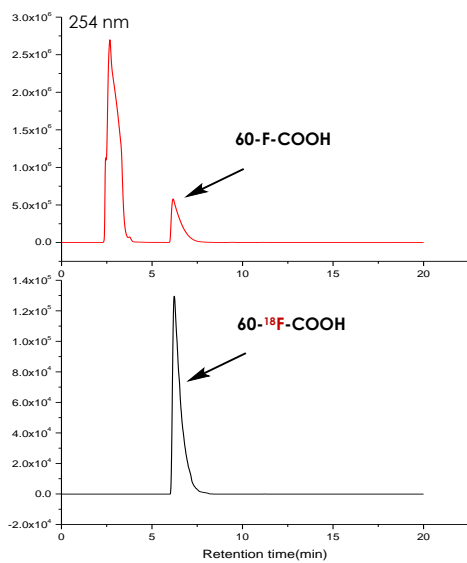

Supplementary Figure 117. HPLC trace of isolation of **60-<sup>18</sup>F-COOH**

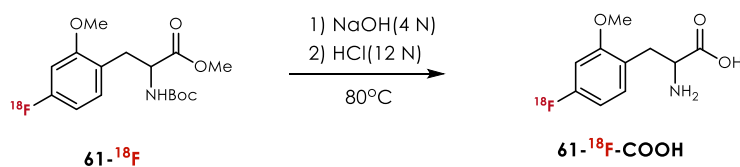

| Tracer                        | Activity ( <b>61-<sup>18</sup>F</b> ) | Injected dose | Collected dose | Isolation time | Decay corrected | Radiochemical conversion |
|-------------------------------|---------------------------------------|---------------|----------------|----------------|-----------------|--------------------------|
| <b>61-<sup>18</sup>F-COOH</b> | 1.183 mCi                             | 997 μCi       | <b>901 μCi</b> | 12 min         | 971.9 μCi       | <b>97.5%</b>             |

Supplementary Table 72. HPLC-isolated RCC of **61-<sup>18</sup>F-COOH**

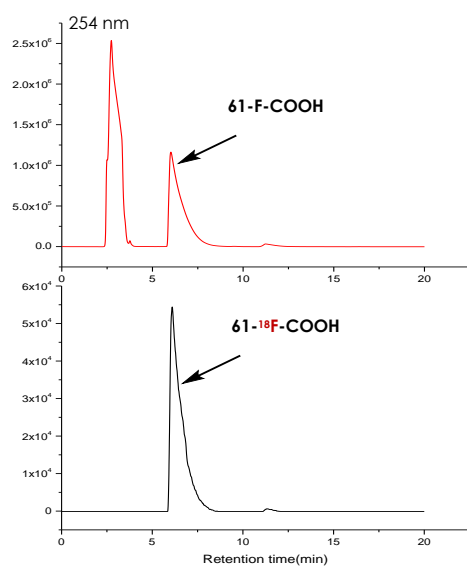

Supplementary Figure 118. HPLC trace of isolation of **61-<sup>18</sup>F-COOH**



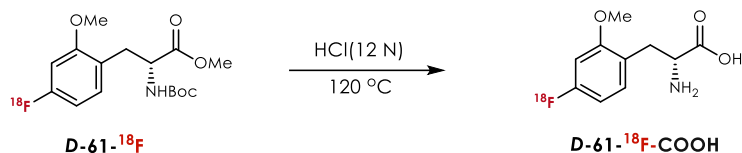

| Tracer                          | Activity (D-61- <sup>18</sup> F) | Injected dose | Collected dose | Isolation time | Decay corrected | Radiochemical conversion |
|---------------------------------|----------------------------------|---------------|----------------|----------------|-----------------|--------------------------|
| <b>D-61-<sup>18</sup>F-COOH</b> | 1.315 mCi                        | 946 μCi       | <b>853 μCi</b> | 10 min         | 908.6 μCi       | <b>96%</b>               |

**Supplementary Table 73.** HPLC-isolated RCC of **D-61-<sup>18</sup>F-COOH**

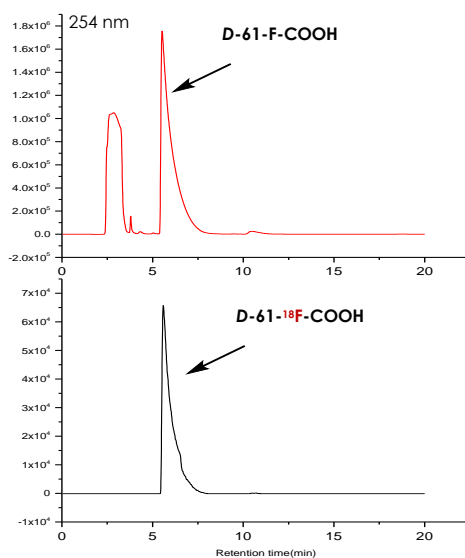

**Supplementary Figure 119.** HPLC trace of isolation of **D-61-<sup>18</sup>F-COOH**

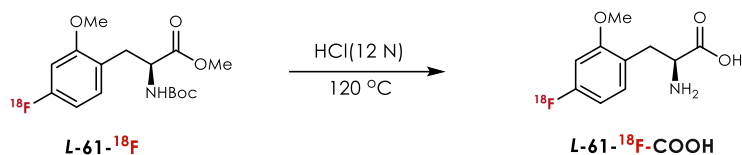

| Tracer                          | Activity (L-61- <sup>18</sup> F) | Injected dose | Collected dose | Isolation time | Decay corrected | Radiochemical conversion |
|---------------------------------|----------------------------------|---------------|----------------|----------------|-----------------|--------------------------|
| <b>L-61-<sup>18</sup>F-COOH</b> | 1.281 mCi                        | 943 μCi       | <b>835 μCi</b> | 10 min         | 889.4 μCi       | <b>94.3%</b>             |

**Supplementary Table 74.** HPLC-isolated RCC of **L-61-<sup>18</sup>F-COOH**

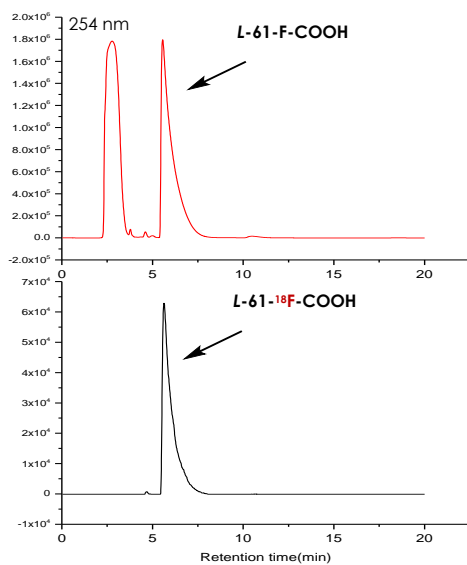

Supplementary Figure 120. HPLC trace of isolation of **L-61-<sup>18</sup>F-COOH**

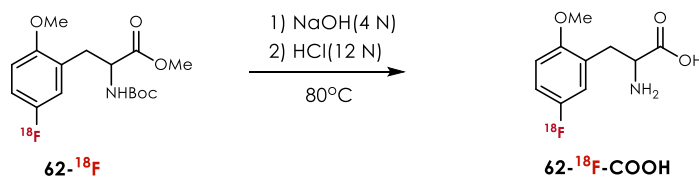

| Tracer                        | Activity ( <b>62-<sup>18</sup>F</b> ) | Injected dose | Collected dose  | Isolation time | Decay corrected | Radiochemical conversion |
|-------------------------------|---------------------------------------|---------------|-----------------|----------------|-----------------|--------------------------|
| <b>62-<sup>18</sup>F-COOH</b> | 1.847 mCi                             | 1541 μCi      | <b>1416 μCi</b> | 11 min         | 1517.9 μCi      | <b>98.5%</b>             |

Supplementary Table 75. HPLC-isolated RCC of **62-<sup>18</sup>F-COOH**

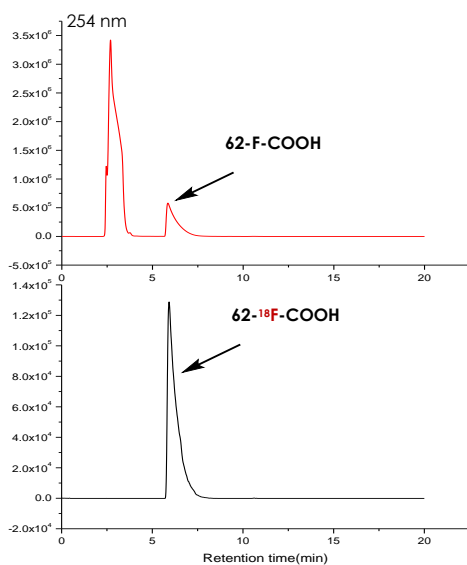

Supplementary Figure 121. HPLC trace of isolation of **62-<sup>18</sup>F-COOH**

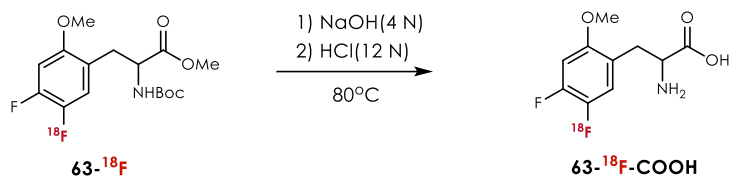

| Tracer                  | Activity ( $63-^{18}\text{F}$ ) | Injected dose       | Collected dose      | Isolation time | Decay corrected     | Radiochemical conversion |
|-------------------------|---------------------------------|---------------------|---------------------|----------------|---------------------|--------------------------|
| $63-^{18}\text{F-COOH}$ | 1.52 mCi                        | 1230 $\mu\text{Ci}$ | 1089 $\mu\text{Ci}$ | 10 min         | 1160 $\mu\text{Ci}$ | 94.3%                    |

Supplementary Table 76. HPLC-isolated RCC of  $63-^{18}\text{F-COOH}$

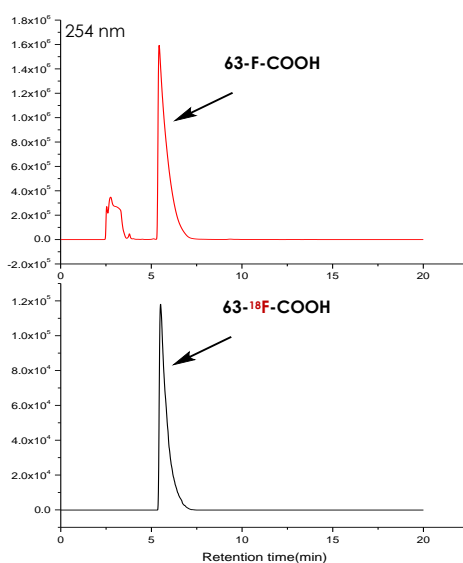

Supplementary Figure 122. HPLC trace of isolation of  $63-^{18}\text{F-COOH}$

### 3.7 Synthesis of $^{18}\text{F}$ -labeled DOPAs via halide/ $^{18}\text{F}$ interconversion

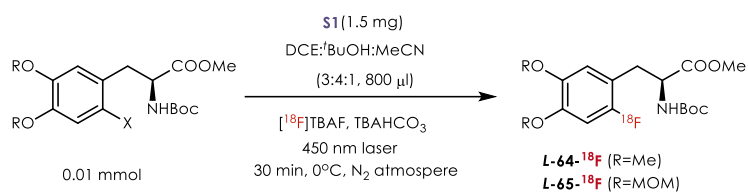

| Reaction | Substrate                        | Activity $[^{18}\text{F}]\text{TBAF}$ | Injected dose      | Collected dose     | Isolation time | Decay corrected dose | Radiochemical conversion (RCC) |
|----------|----------------------------------|---------------------------------------|--------------------|--------------------|----------------|----------------------|--------------------------------|
| 1        | $L-64-\text{Cl}$<br>(R=Me, X=Cl) | 13.75 mCi                             | 368 $\mu\text{Ci}$ | 14 $\mu\text{Ci}$  | 17 min         | 15.6 $\mu\text{Ci}$  | 4.2%                           |
| 2        |                                  | 7.86 mCi                              | 332 $\mu\text{Ci}$ | 216 $\mu\text{Ci}$ | 19 min         | 243.5 $\mu\text{Ci}$ | 73.4%                          |
| 3        | $L-64-\text{F}$ (R=Me,<br>X=F)   | 22.9 mCi                              | 998 $\mu\text{Ci}$ | 388 $\mu\text{Ci}$ | 17 min         | 432 $\mu\text{Ci}$   | 43.3% <sup>a</sup>             |
| 4        |                                  | 12.59 mCi                             | 712 $\mu\text{Ci}$ | 133 $\mu\text{Ci}$ | 19 min         | 150 $\mu\text{Ci}$   | 21.1% <sup>b</sup>             |
| 5        |                                  | 7.64 mCi                              | 485 $\mu\text{Ci}$ | 318 $\mu\text{Ci}$ | 18 min         | 356.3 $\mu\text{Ci}$ | 73.5% <sup>c, d</sup>          |

|           |                         |           |               |              |        |                |                             |
|-----------|-------------------------|-----------|---------------|--------------|--------|----------------|-----------------------------|
| <b>6</b>  |                         | 12.39 mCi | 399 $\mu$ Ci  | 256 $\mu$ Ci | 15 min | 281.4 $\mu$ Ci | 70.5% <sup>c, d, e, g</sup> |
| <b>7</b>  |                         | 13.46 mCi | 311 $\mu$ Ci  | 212 $\mu$ Ci | 14 min | 231.6 $\mu$ Ci | 74.4% <sup>c, f, g</sup>    |
| <b>8</b>  |                         | 10.18 mCi | 247 $\mu$ Ci  | 93 $\mu$ Ci  | 14 min | 101.6 $\mu$ Ci | 41.1% <sup>a, c, f, g</sup> |
| <b>9</b>  |                         | 28.1 mCi  | 1678 $\mu$ Ci | 700 $\mu$ Ci | 20 min | 794.2 $\mu$ Ci | 47.3% <sup>h</sup>          |
| <b>10</b> | <b>L-65-F</b>           | 18.33 mCi | 505 $\mu$ Ci  | 324 $\mu$ Ci | 18 min | 363 $\mu$ Ci   | 71.9%                       |
| <b>11</b> | <b>(R=MOM,<br/>X=F)</b> | 13.68 mCi | 554 $\mu$ Ci  | 335 $\mu$ Ci | 18 min | 40.3 $\mu$ Ci  | 67.7% <sup>c, d</sup>       |

<sup>a</sup>Blue LED was used instead of laser. <sup>b</sup>No DCE were added in the reaction. <sup>c</sup>No ice cooling and 500  $\mu$ l DCE were used.

<sup>d</sup>Reaction ran 20 min. <sup>e</sup>0.005 mmol substrate. <sup>f</sup>Reaction ran 5 min. <sup>g</sup>Isolated under isocratic elution of 35% MeCN. <sup>h</sup>Air bubbling instead of N<sub>2</sub>.

### Supplementary Table 77. HPLC-isolated RCCs of **L-64-<sup>18</sup>F** and **L-65-<sup>18</sup>F**

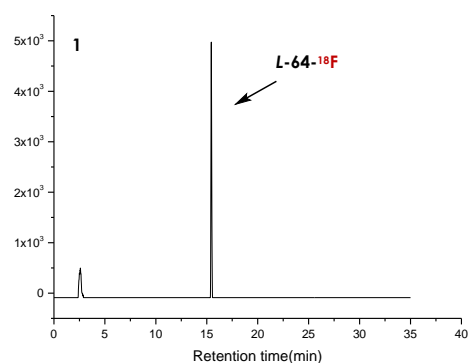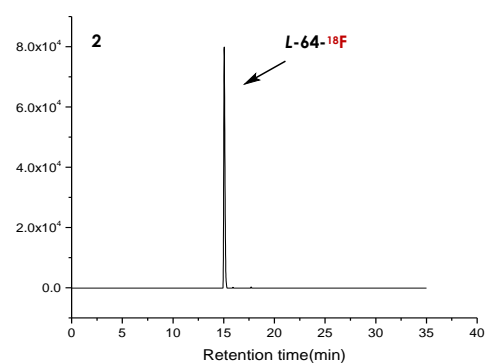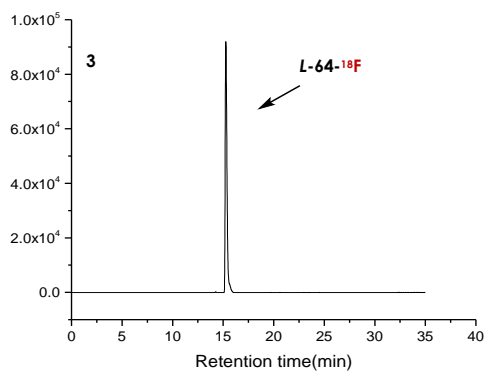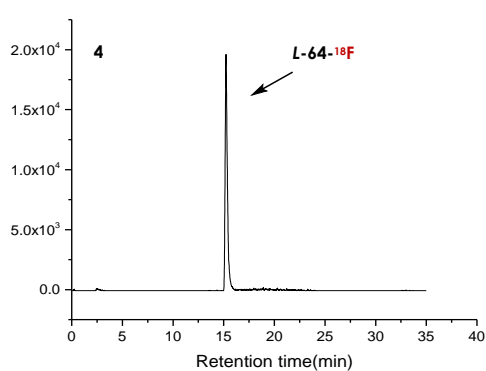

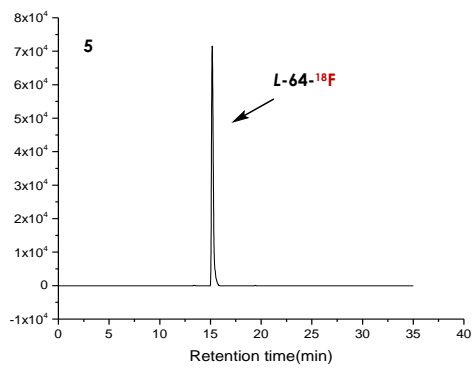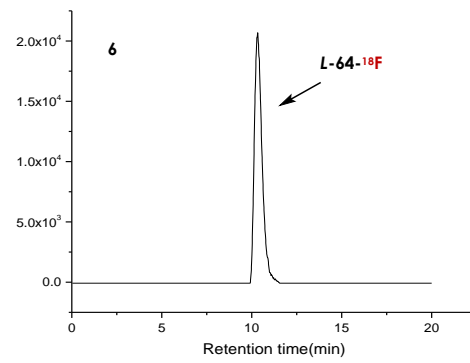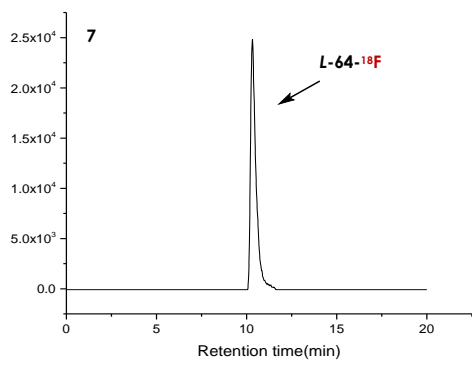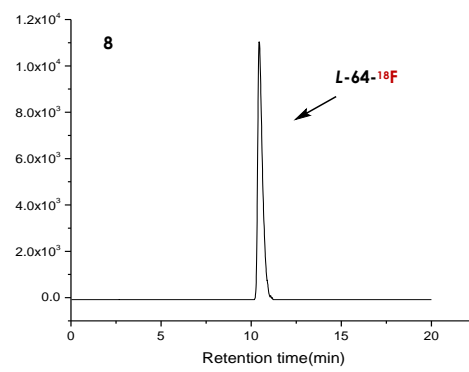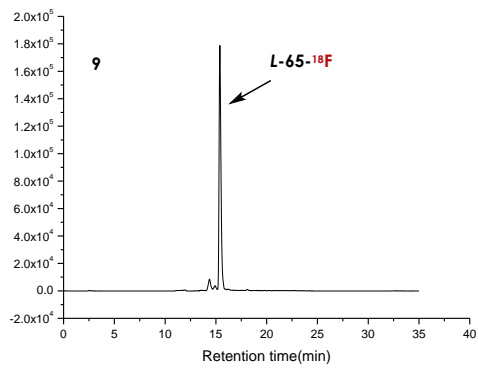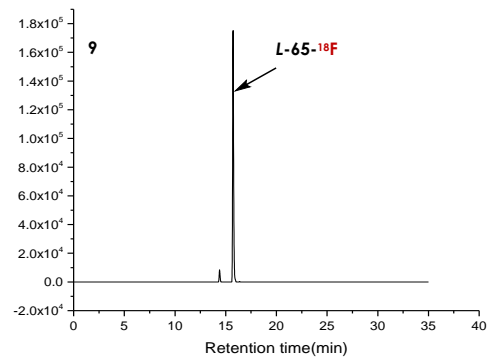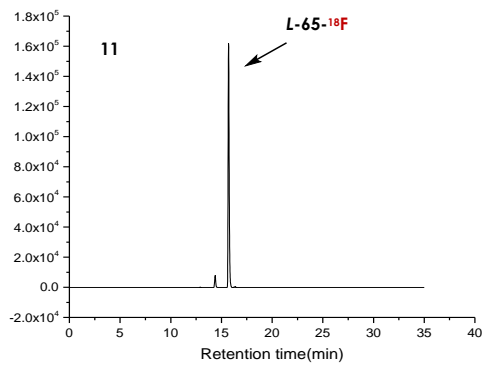

**Supplementary Figure 123.** Crude radio-HPLC traces of synthesis of **L-64-<sup>18</sup>F** and **L-65-<sup>18</sup>F**

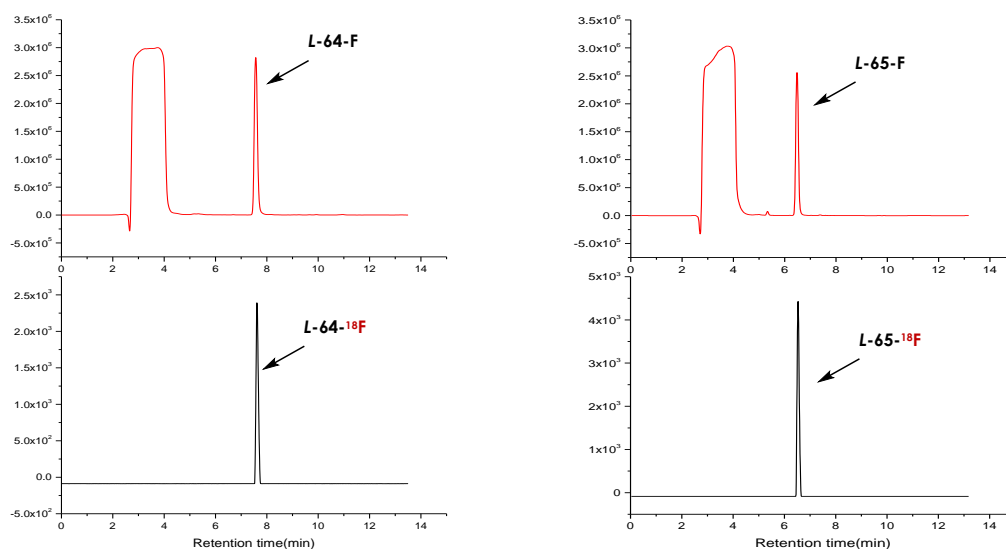

**Supplementary Figure 124.** HPLC traces of purification of **L-64-<sup>18</sup>F** (left) and **L-65-<sup>18</sup>F** (right)

### Deprotection of **L-64-<sup>18</sup>F** to [<sup>18</sup>F]FDOPA

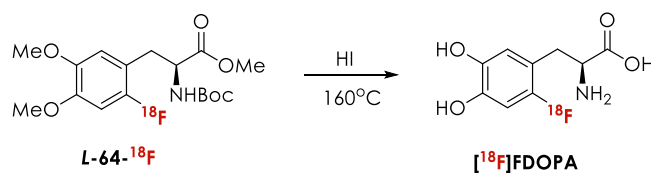

The isolated **L-64-<sup>18</sup>F** from the labeling reaction above was transferred into a 5 ml v-vial and capped with a Teflon-lined septum screw cap equipped with a vent needle. The solvent was removed under 80°C with argon stream. Argon flow was then stopped and the vent needle was removed. 100 µl HI (57 wt.% in H<sub>2</sub>O) was then added into the V-vial via syringe and the mixture was heated under 160°C for 10 min. The V-vial was cooled. The cap was then removed and saturated NaHCO<sub>3</sub> (200 µl) solution was added to the V-vial. The resulted aqueous solution was then purified on the radio-HPLC to afford the [<sup>18</sup>F]FDOPA in 97.1% RCC. The [<sup>18</sup>F]FDOPA was then analyzed on the radio-HPLC with a chiral column. The [<sup>18</sup>F]FDOPA was confirmed by comparison of the radio-HPLC trace with the UV HPLC traces of F-L-DOPA and > 99% ee was further confirmed by comparison and co-injection of the [<sup>18</sup>F]FDOPA with racemic FDOPA on a chiral column.

| Injected dose | Collected dose | Isolation time | Decay corrected dose | Radiochemical conversion (RCC) |
|---------------|----------------|----------------|----------------------|--------------------------------|
| 510 µCi       | 465 µCi        | 10 min         | 495.3 µCi            | 97.1%                          |

**Supplementary Table 78.** HPLC-isolated RCC of deprotection of **L-64-<sup>18</sup>F** to [<sup>18</sup>F]FDOPA

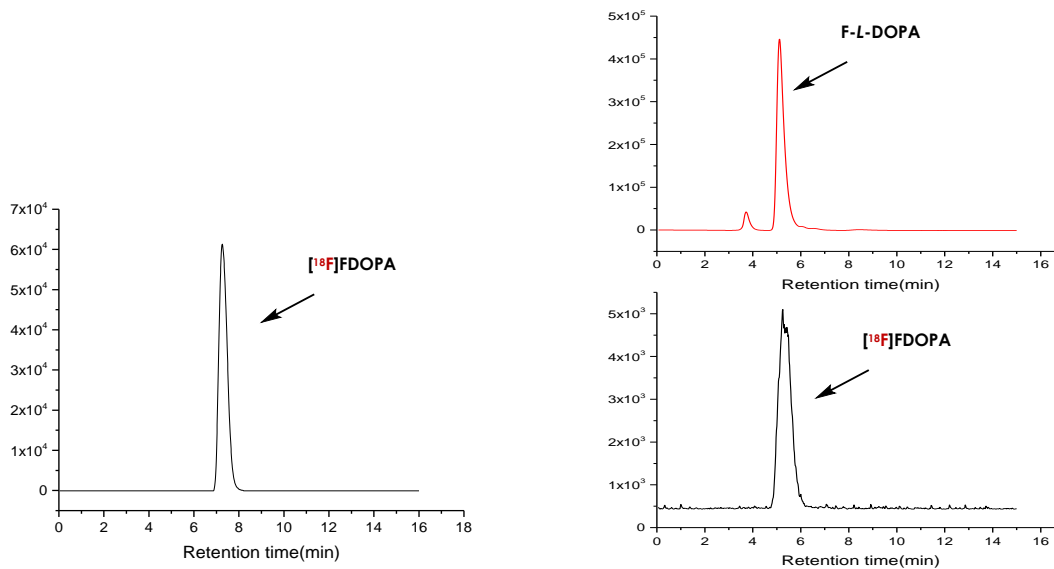

**Supplementary Figure 125.** Crude radio-HPLC trace of  $[^{18}\text{F}]\text{FDOPA}$  (left) and comparison of the  $[^{18}\text{F}]\text{FDOPA}$  with F-L-DOPA (right) on chiral column.

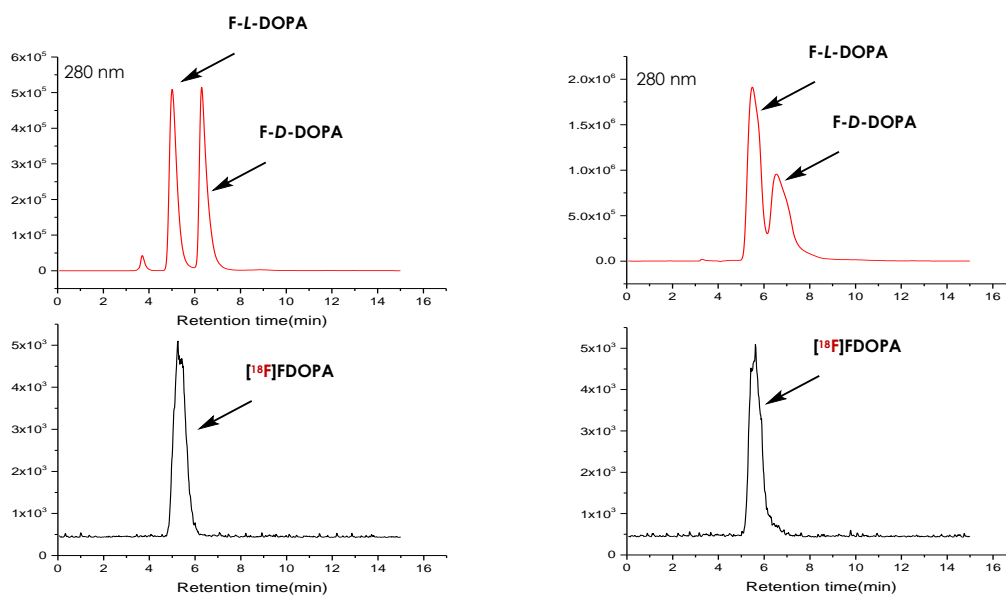

**Supplementary Figure 126.** Comparison(left) and co-injection (right)of  $[^{18}\text{F}]\text{FDOPA}$  with racemic FDOPA.

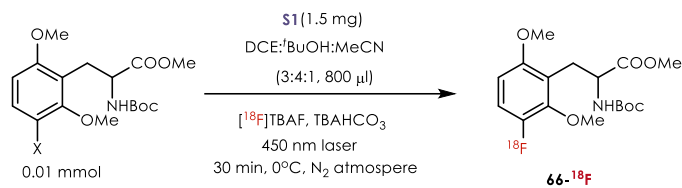

| Reaction | Substrate                       | Activity  | Injected dose | Collected dose | Isolation time | Decay corrected | Radiochemical conversion (RCC) |
|----------|---------------------------------|-----------|---------------|----------------|----------------|-----------------|--------------------------------|
| 1        | <b>66-F (X=F)</b>               | 11.91 mCi | 618 $\mu$ Ci  | 437 $\mu$ Ci   | 20 min         | 495.8 $\mu$ Ci  | <b>80.2%</b>                   |
| 2        | <b>66-Cl (X=Cl)<sup>a</sup></b> | 18.99 mCi | 478 $\mu$ Ci  | 163 $\mu$ Ci   | 20 min         | 184.9 $\mu$ Ci  | 38.7%                          |
| 3        |                                 | 10.11 mCi | 784 $\mu$ Ci  | 357 $\mu$ Ci   | 19 min         | 402.5 $\mu$ Ci  | 51.3%                          |
| 4        |                                 | 14.65 mCi | 781 $\mu$ Ci  | 352 $\mu$ Ci   | 20 min         | 399.4 $\mu$ Ci  | 51.1%                          |

Average RCC from **66-Cl** to **66-<sup>18</sup>F**: **47.0 $\pm$ 5.9%** (n=3)

**Note:** a. 0.05 mmol substrate.

**Supplementary Table 79.** HPLC-isolated RCCs of **66-<sup>18</sup>F**

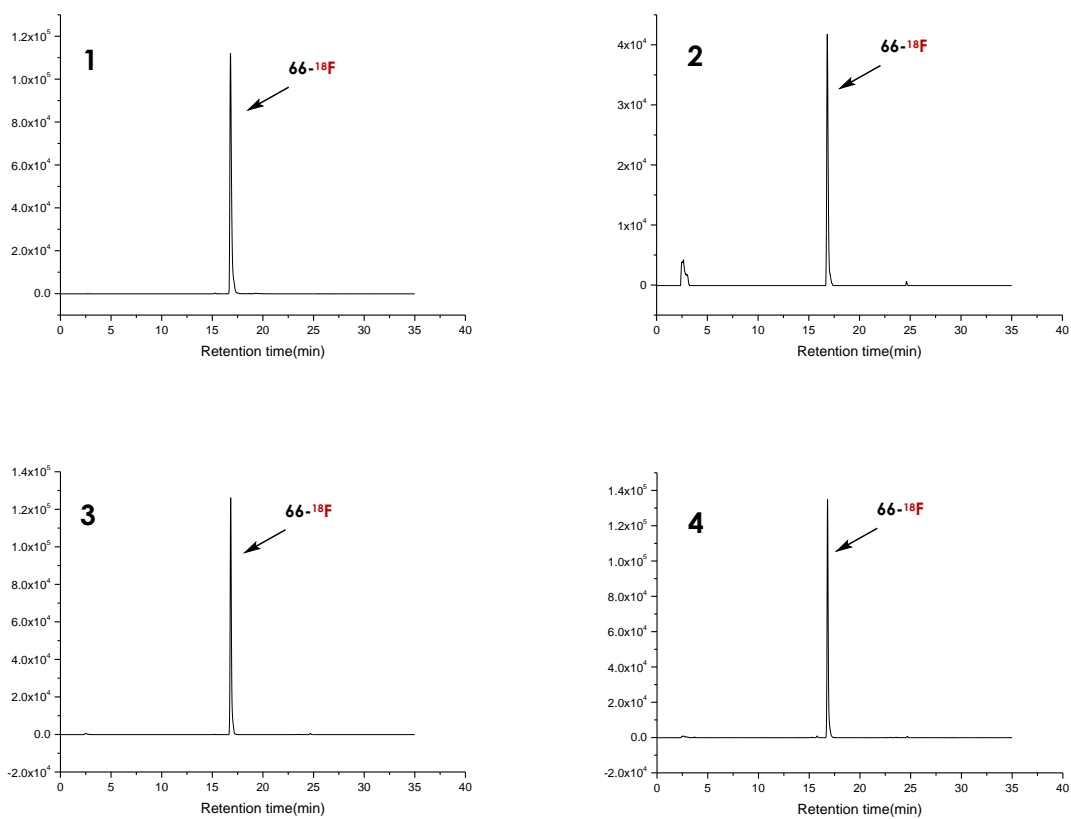

**Supplementary Figure 127.** Crude radio-HPLC traces from **66-F** and **66-Cl** to **66-<sup>18</sup>F**



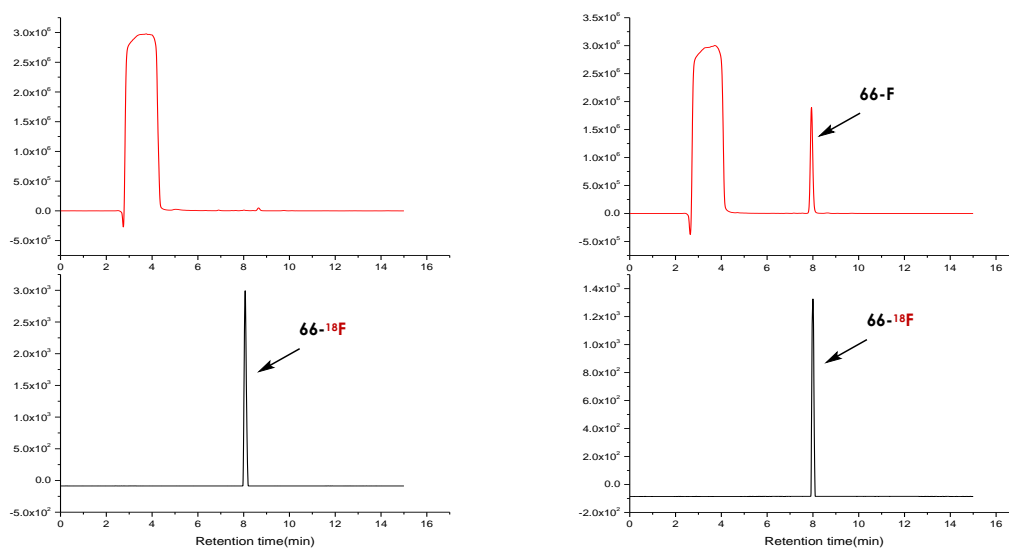

**Supplementary Figure 128.** Purification (left) and co-injection(right) for **66-<sup>18</sup>F**

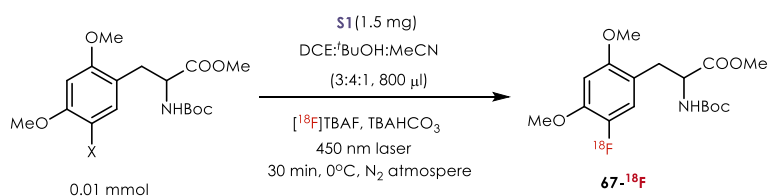

| Reaction | Substrate                       | Activity  | Injected dose | Collected dose | Isolation time | Decay corrected | Radiochemical conversion |
|----------|---------------------------------|-----------|---------------|----------------|----------------|-----------------|--------------------------|
| 1        | <b>67-F (X=F)</b>               | 12.32 mCi | 489 μCi       | 297 μCi        | 20 min         | 337 μCi         | <b>68.9%</b>             |
| 2        |                                 | 13.33 mCi | 507 μCi       | 81 μCi         | 18 min         | 90.8 μCi        | 17.9%                    |
| 3        | <b>67-Cl (X=Cl)<sup>a</sup></b> | 11.35 mCi | 517 μCi       | 88 μCi         | 19 min         | 99.2 μCi        | 19.2%                    |
| 4        |                                 | 9.86 mCi  | 591 μCi       | 81 μCi         | 21 min         | 92.5 μCi        | 15.6%                    |

Average RCC from **67-Cl** to **67-<sup>18</sup>F**: **17.6±1.5%** (n=3)

<sup>a</sup>0.05 mmol substrate.

**Supplementary Table 80.** HPLC-isolated RCCs of **67-<sup>18</sup>F**

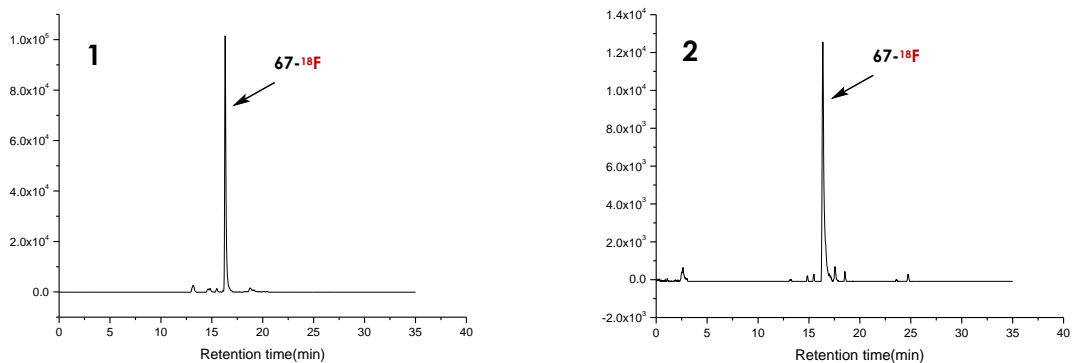

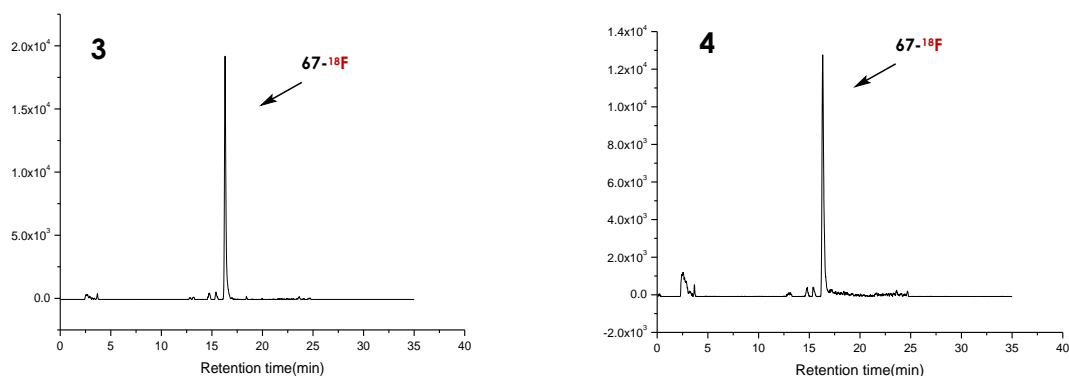

Supplementary Figure 129. Crude radio-HPLC traces from **67-F** and **67-Cl** to **67-18F**

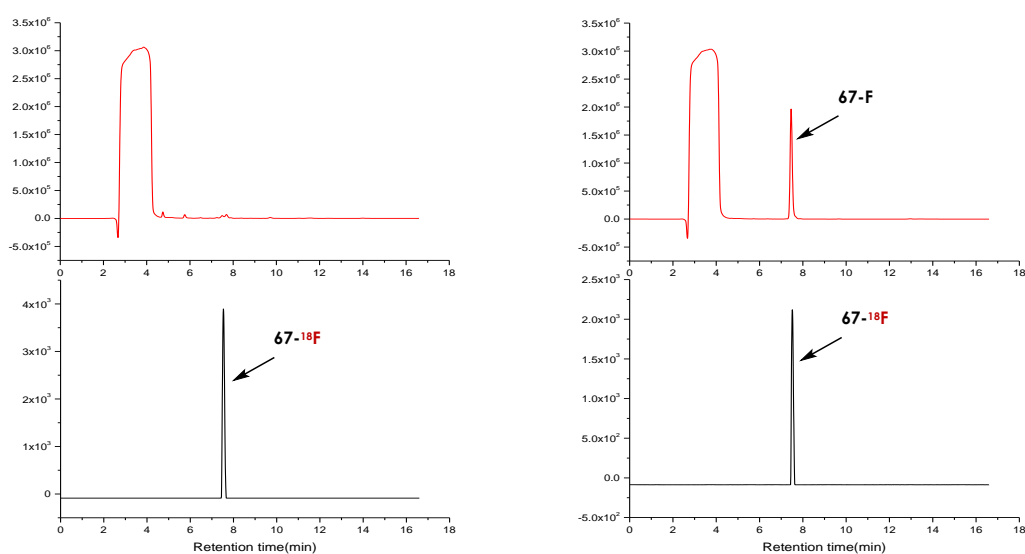

Supplementary Figure 130. Purification (left) and co-injection (right) for **67-18F**

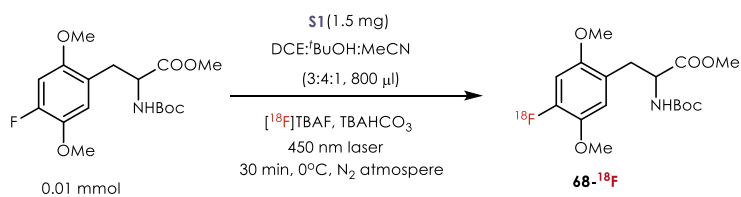

| Reaction | Substrate | Activity  | Injected dose      | Collected dose     | Isolation time | Decay corrected      | Radiochemical conversion (RCC) |
|----------|-----------|-----------|--------------------|--------------------|----------------|----------------------|--------------------------------|
| 1        | <b>68</b> | 11.13 mCi | 737 $\mu\text{Ci}$ | 192 $\mu\text{Ci}$ | 19 min         | 216.5 $\mu\text{Ci}$ | <b>29.4%</b>                   |

Supplementary Table 81. HPLC-isolated RCC of **68-18F**

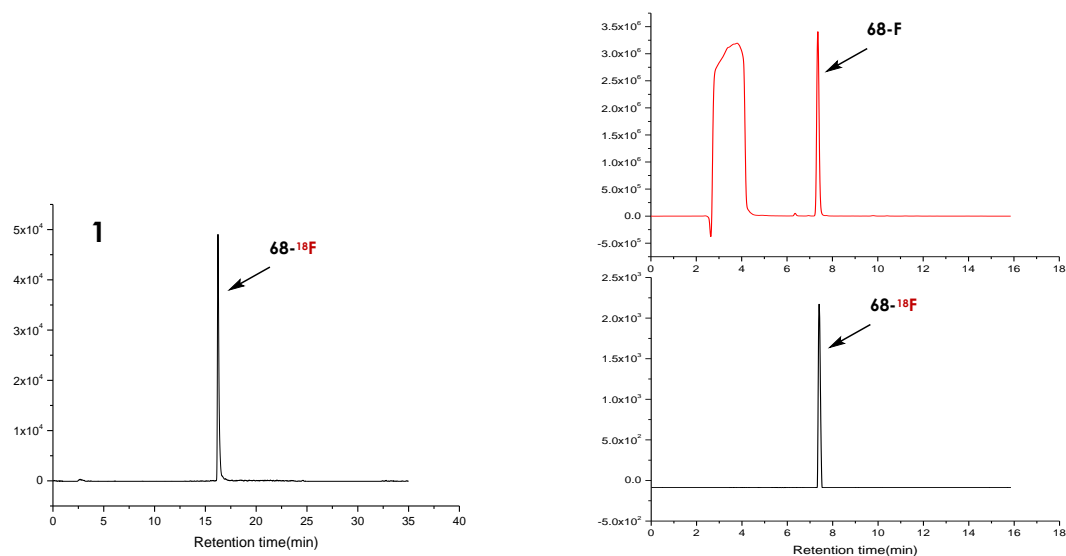

**Supplementary Figure 131.** Crude radio-HPLC trace(left) and purification (right)of **68-<sup>18</sup>F**

### 3.8 Small scale synthesis of [<sup>18</sup>F]FDOPA from preformed [<sup>18</sup>F]TBAF

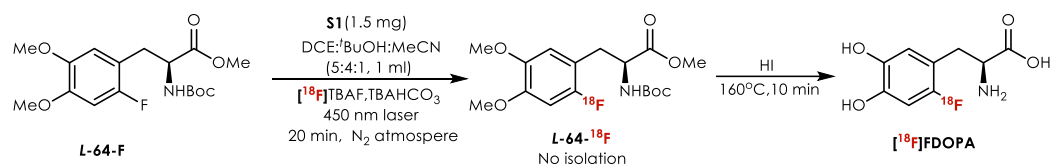

The FDOPA precursor **L-64-F** (0.01 or 0.005 mmol) and Photocatalyst **S1** (1.5 mg) were dissolved in the DCE/*t*BuOH/MeCN in a 5 ml V-vial. After addition of the [<sup>18</sup>F]TBAF and TBAHCO<sub>3</sub> (25 μl), the solution was top-down irradiated for 20 min under 450 nm laser (450 nm, 3.5 W after fibre coupling) with a N<sub>2</sub> balloon sparge at room temperature. The resulting reaction solution was diluted with 1 mL MeCN and passed through an aluminum cartridge (preconditioned with 5 mL DI water) to remove the unconverted <sup>18</sup>F-fluoride. Rinse the reaction vial with another 1 mL MeCN which was then passed through the same aluminum cartridge. The elution was collected in another 5 mL V-Vial and capped with a Teflon-lined septum screw cap equipped with a vent needle. The solvent was removed under 100°C with argon stream. Ar flow was then stopped and the vent needle was removed. 200 μl HI (57 wt.% in H<sub>2</sub>O) were then added into the V-vial and the mixture was heated under 160°C for 10 min. A vent needle was then equipped before water (300 μl) and saturated NaHCO<sub>3</sub> solution (400 μl) was slowly added to the V-vial. The resulting aqueous solution was passed through a HPLC filter to remove the insoluble catalyst residue. The collected solution was then purified on HPLC to give the product [<sup>18</sup>F]FDOPA.

#### HPLC isolation condition for reaction 1 and 2:

Column: Phenomenex, Kinetex® 4 µm Synergi 80 Å, 250 x 10.00 mm LC Column. Solvent: 10 mM KH<sub>2</sub>PO<sub>4</sub>. Flow rate: 5 mL/min.

**HPLC condition for QC of reaction 1:**

Column: Phenomenex, Kinetex® 4 µm Synergi 80 Å, 250 x 10.00 mm LC Column. Solvent: 10 mM KH<sub>2</sub>PO<sub>4</sub>. Flow rate: 5 mL/min.

**HPLC condition for QC of reaction 2:**

Column: Phenomenex, Kinetex® 10 µm Synergi 80 Å, 250 x 10.00 mm LC Column. Solvent: 10 mM KH<sub>2</sub>PO<sub>4</sub>. Flow rate: 3 mL/min.

| Reaction | Substrate           | Activity ([ <sup>18</sup> F]TBAF) | Activity (Isolated [ <sup>18</sup> F]FDOPA) | n.d.c RCY | Total synthesis time |
|----------|---------------------|-----------------------------------|---------------------------------------------|-----------|----------------------|
| 1        | L-64-F (0.01 mmol)  | 30.3 mCi                          | 12.74 mCi                                   | 42%       | 67 min               |
| 2        | L-64-F (0.005 mmol) | 25.5mCi                           | 9.65 mCi                                    | 37.8%     | 66 min               |

**Supplementary Table 82.** HPLC-isolated n.d.c. RCYs of [<sup>18</sup>F]FDOPA

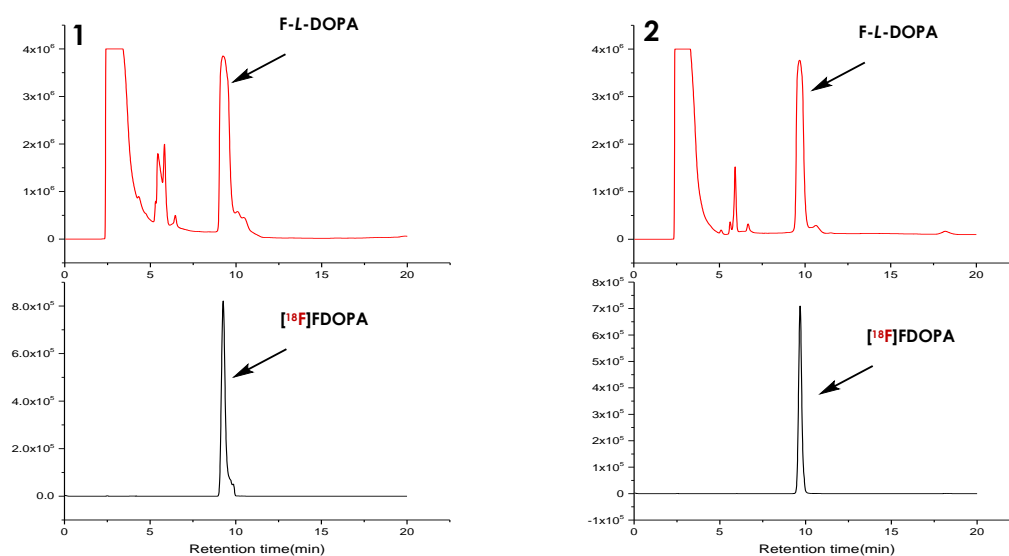

**Supplementary Figure 132.** Crude HPLC trace of isolation of [<sup>18</sup>F]FDOPA from reaction 1 and 2

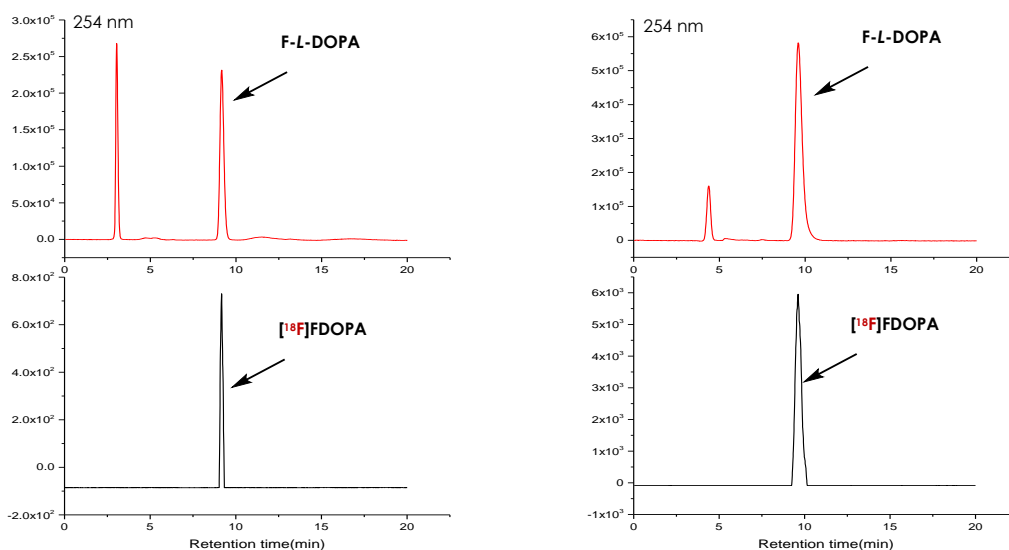

**Supplementary Figure 133.** HPLC trace of isolated  $[^{18}\text{F}]\text{FDOPA}$  from reaction 1 and 2

### 3.9 Scale-up synthesis of $[^{18}\text{F}]\text{FDOPA}$ from $[^{18}\text{F}]\text{F}^-$

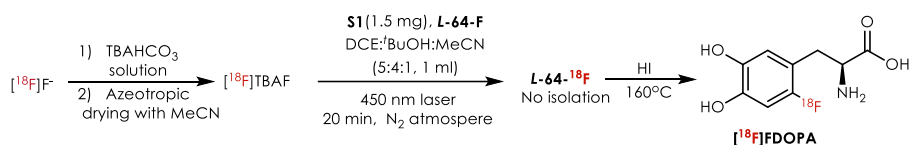

The aqueous solution of  $[^{18}\text{F}]\text{F}^-$  fluoride produced via the  $^{18}\text{O}(\text{p},\text{n})^{18}\text{F}$  reaction by proton irradiation (40  $\mu\text{A}$ ) was delivered to a hot cell equipped with manipulators and collected in a 5 ml V-vial containing 5  $\mu\text{l}$  TBAB (20%) water solution. This aqueous solution was azeotropically dried with anhydrous MeCN (1 ml  $\times$  5) under a stream of Argon at 100°C. After removing the water, the V-vial was removed from the heater. The solution of precursor **L-64-F** (0.01 mmol) and photocatalyst (**S1**, 1.5 mg) in DCE/*i*BuOH/MeCN (5/4/1, 1 ml) was then added into the V-vial. A needle connected to a  $\text{N}_2$  filled balloon was inserted into the bottom of the V-vial and the reaction medium was continuously sparged with  $\text{N}_2$  for the entire reaction time. The reaction was then irradiated top-down with an optic fiber of an OEM diode laser (450 nm, 3.5 W after fibre coupling) for 20 min. The resulting reaction was diluted with 1 ml MeCN and passed through an aluminum cartridge (preconditioned with 5 ml DI water) to remove the unconverted  $^{18}\text{F}$ -fluoride. Rinse the reaction vial with another 1 ml MeCN which was then passed through the same aluminum cartridge. The elution was collected in another 5 ml V-Vial and capped with a Teflon-lined septum screw cap equipped with a vent needle. The solvent was removed under 100°C with argon stream. Ar flow was then stopped and the vent needle was removed. 200  $\mu\text{l}$  HI (57 wt.% in  $\text{H}_2\text{O}$ ) were then added into the V-vial and the mixture was

heated under 160°C for 10 min. A vent needle was then equipped before water (300 µl) and saturated NaHCO<sub>3</sub> solution (400 µl) was slowly added to the V-vial. The resulting aqueous solution was passed through a HPLC filter to remove the insoluble catalyst residue. The collected solution was then purified on HPLC to give the product [<sup>18</sup>F]FDOPA. (Note: all these operation were conducted in the hot cell) .

The isolated [<sup>18</sup>F]FDOPA (> 99% ee) was confirmed by HPLC traces comparison with the racemic FDOPA.

Synthesis data were summarized in the table (Supplementary Table 83) below.

HPLC isolation conditions:

Column: Phenomenex, Kinetex® 4 µm Synergi 80 Å, 250 x 10.00 mm LC Column. Mobile phase: 10 mM KH<sub>2</sub>PO<sub>4</sub>. Flow rate: 5 mL/min.

HPLC conditions for comparison isolated [<sup>18</sup>F]FDOPA with racemic FDOPA:

Column: Astec CHIROBIOTICR T Chiral HPLC Column, 5 µm particle size, 250 mm x 4.6 mm, SUPELCO. Mobile phase: 0.2 mL formic acid in 700 ml MeOH and 300 mL water (Ph=3.5).

Flow rate: 1 ml/min

| Reaction       | Activity ([ <sup>18</sup> F]F-) | Substrate                  | Activity (Isolated [ <sup>18</sup> F]FDOPA) | n.d.c RCY          | Total synthesis time |
|----------------|---------------------------------|----------------------------|---------------------------------------------|--------------------|----------------------|
| 1 <sup>a</sup> | 1.023 Ci                        | <b>L-64-F</b> (0.01 mmol)  | <b>197 mCi</b>                              | 19.3% <sup>a</sup> | 93 min               |
| 2              | 1.12 Ci                         | <b>L-64-F</b> (0.008 mmol) | <b>259 mCi</b>                              | 23.1%              | 87 min               |
| 3 <sup>b</sup> | 1.024 Ci                        | <b>L-64-F</b> (0.01 mmol)  | <b>310 mCi</b>                              | 30.2%              | 87 min               |
| 4              | 1.07 Ci                         | <b>L-64-F</b> (0.01 mmol)  | <b>348 mCi</b>                              | 32.5%              | 98 min               |

<sup>a</sup>100 µl HI was used (incomplete deprotection). <sup>b</sup>Fail to record the isolation HPLC trace.

**Supplementary Table 83.** HPLC-isolated n.d.c. RCYs of [<sup>18</sup>F]FDOPA

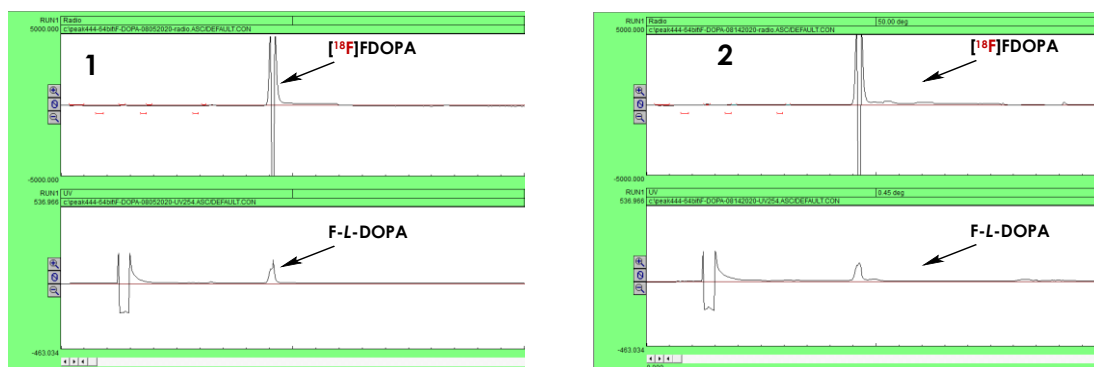

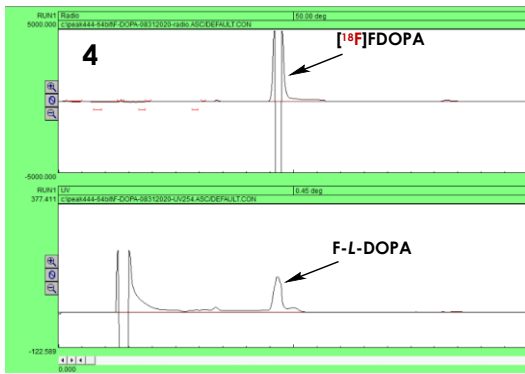

Supplementary Figure 134. HPLC traces of isolation of  $[^{18}\text{F}]\text{FDOPA}$  from reaction 1, 2 and 4

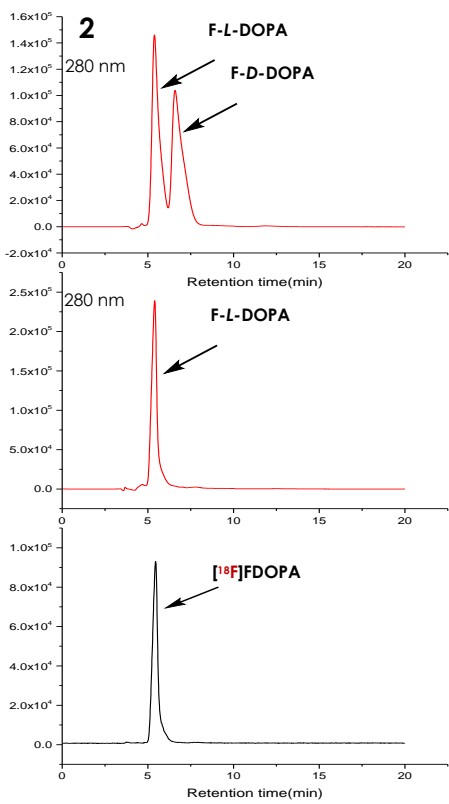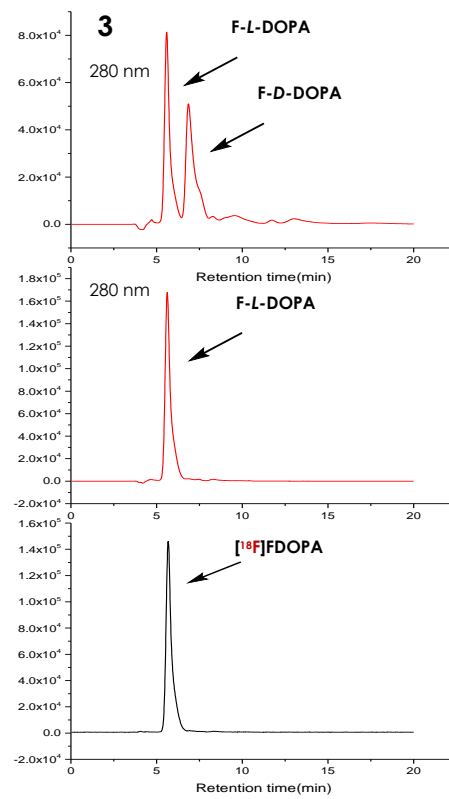

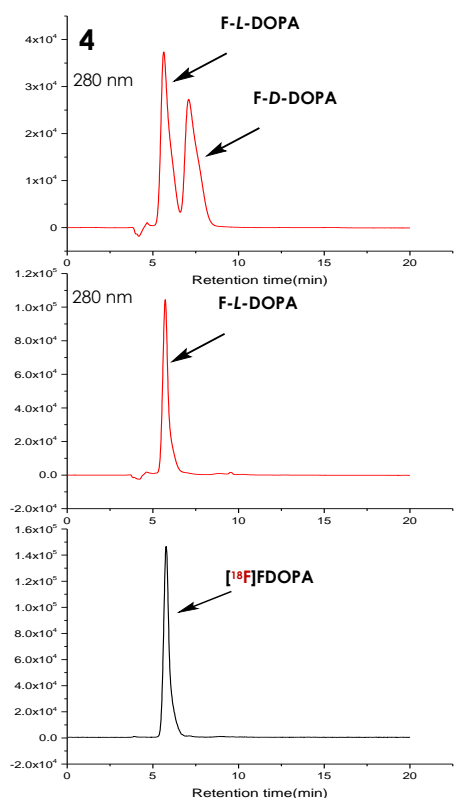

**Supplementary Figure 135.** HPLC traces of comparison of isolated [ $^{18}\text{F}$ ]FDOPA from reaction **2**, **3** and **4** with racemic FDOPA

### 3.10. Molar activity calculation

#### Molar activity calculation for [ $^{18}\text{F}$ ]1-fluoro-4-methoxybenzene (**1- $^{18}\text{F}$** ) obtained from labeling of **1-Cl** (Cl/ $^{18}\text{F}$ exchange).

Molar activity was calculated using a standard curve of the corresponding fluorinated arene. A  $^{19}\text{F}$  standard curve [Y axis = UV area, X axis = mole number ( $\mu\text{mol}$ )] was created from the HPLC trace from a standard solution of 1-fluoro-4-methoxybenzene (**1-F**). The radiolabeled product from the labeling reaction was collected and purified via HPLC; the UV area overlapping with the radio peak was then recorded. The standard curve was used to calculate mole number. Dividing the product decay corrected activity by the mole number gives the molar activity in GBq/ $\mu\text{mol}$ . In this example, the isolated product [ $^{18}\text{F}$ ]1-fluoro-4-methoxybenzene has a molar activity of  $71.25 \pm 4.18$  GBq/ $\mu\text{mol}$ , which is decay corrected to the end of bombardment (EOB).

**a**

| 1-fluoro-4-methoxybenzene ( $10^{-4}$ $\mu\text{mol}$ ) | UV area ( $10^4$ ) |
|---------------------------------------------------------|--------------------|
| 0                                                       | 0                  |



|       |          |
|-------|----------|
| 3.96  | 9.1876   |
| 7.93  | 20.8663  |
| 15.86 | 40.6923  |
| 31.71 | 83.1809  |
| 79.28 | 164.1623 |

**b**

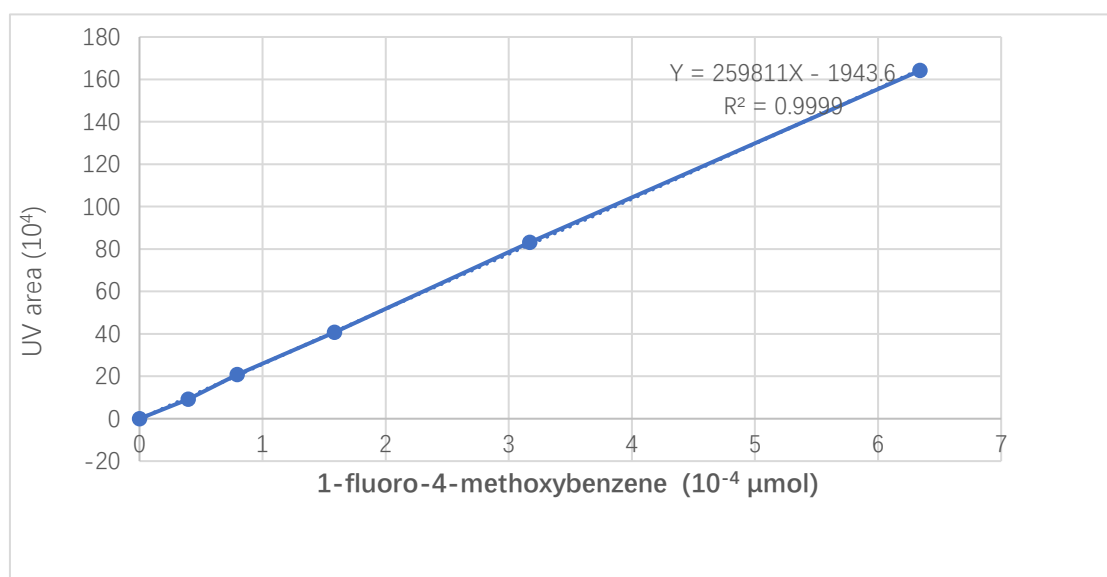

**c**

| Entry | Decay corrected (EOS) Activity (10 <sup>-4</sup> GBq) | UV area (10 <sup>4</sup> ) | 1-fluoro-4-methoxybenzene (10 <sup>-4</sup> μmol) | Molar activity (GBq/μmol) |
|-------|-------------------------------------------------------|----------------------------|---------------------------------------------------|---------------------------|
| 1     | 133                                                   | 4.8396                     | 1.94                                              | 68.56                     |
| 2     | 125                                                   | 4.0045                     | 1.62                                              | 77.16                     |
| 3     | 100                                                   | 3.6343                     | 1.47                                              | 68.03                     |

Average molar activity: 71.25 ± 4.18 GBq/μmol

**Supplementary Figure 136.** **a** and **b**, Standard curve data for **1-F**; **c**, the average molar activity for **1-<sup>18</sup>F** calculated from parts **a** and **b**.

#### Molar activity calculation for [<sup>18</sup>F]FDOPA

Follow the same procedure to calculate the molar activity of [<sup>18</sup>F]1-fluoro-4-methoxybenzene(1-<sup>18</sup>F) above, the standard curve was prepared from the 6-Fluoro-L-FDOPA hydrochloride (purchased from ABX). The dose decay corrected back to end of synthesis of purified [<sup>18</sup>F]FDOPA and corresponding UV area integration were recorded. [<sup>18</sup>F]FDOPA has a

molar activity of 1.51 GBq/ $\mu\text{mol}$  at end of synthesis.

**a**

| 6-Fluoro-L-FDOPA hydrochloride ( $10^{-3} \mu\text{mol}$ ) | UV area ( $10^4$ ) |
|------------------------------------------------------------|--------------------|
| 0                                                          | 0                  |
| 4.37                                                       | 73.8691            |
| 8.74                                                       | 139.4975           |
| 17.48                                                      | 263.2771           |
| 43.7                                                       | 806.2787           |

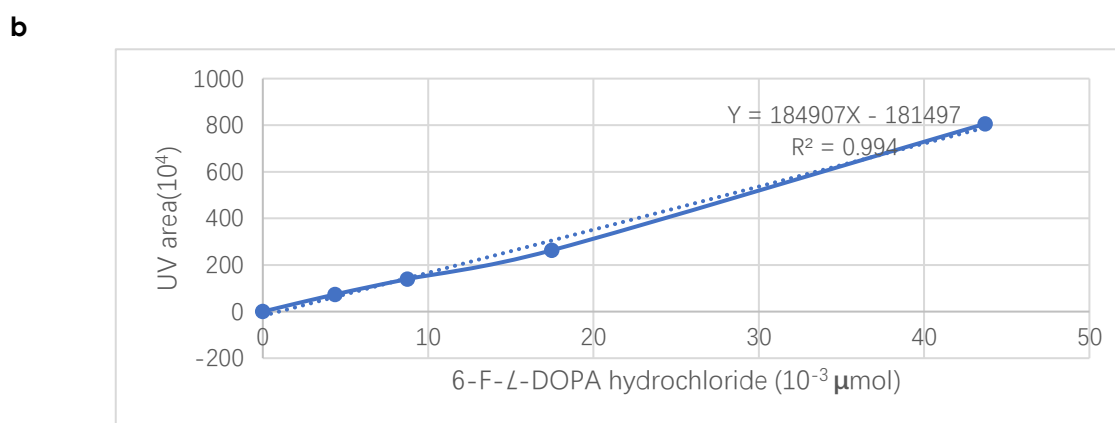

**c**

| Entry | Decay corrected (EOS) Activity ( $10^{-3} \text{GBq}$ ) | UV area ( $10^4$ ) | FDOPA ( $10^{-3} \mu\text{mol}$ ) | Molar activity ( $\text{GBq}/\mu\text{mol}$ ) |
|-------|---------------------------------------------------------|--------------------|-----------------------------------|-----------------------------------------------|
| 1     | 21.9                                                    | 249.2604           | 14.5                              | 1.51                                          |

**Supplementary Figure 137.** **a** and **b**, Standard curve data for FDOPA; **c**, molar activity for  $[^{18}\text{F}]$ FDOPA calculated from parts **a** and **b**.

### 3.11. Less effective substrates for photoredox-mediated halide/ $^{18}\text{F}$ interconversion

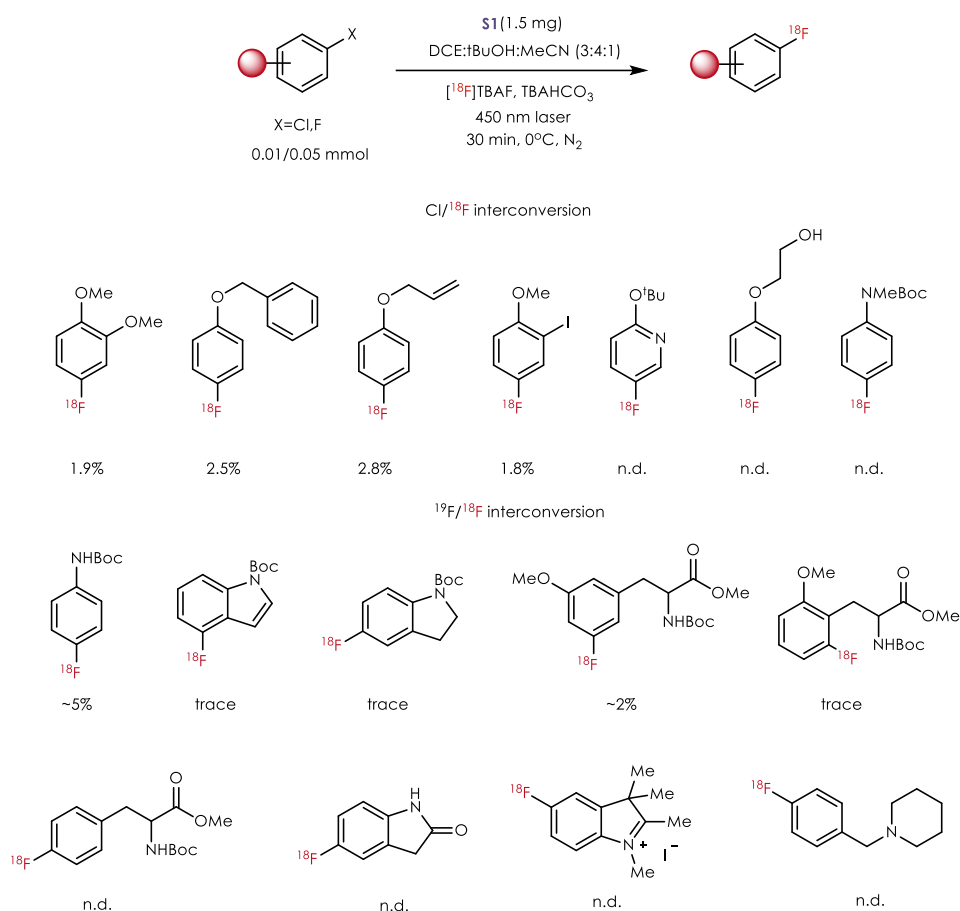

**Supplementary Figure 138.** Less effective substrates for photoredox-mediated halide/<sup>18</sup>F interconversion. All reactions were performed according to the general procedure at section 3.4. n.d., not detected.

#### 4. Positron emission tomography (PET) Imaging Study

##### *In Vivo* PET Imaging in MCF-7 breast cancer xenografts in nude mice

**Materials and methods:** All animal studies were conducted in compliance with the protocol approved by the University of North Carolina Institutional Animal Care and Use Committee. Human breast cancer cells line MCF-7 was obtained from American Type Culture (Manassas, VA, USA) and cultured in Eagle's Minimum Essential Medium (EMEM) (Gibco, Grand Island, NY, USA) supplemented with 10% fetal bovine serum (FBS) (SAFC Bioscience, Lenexa, KS). MCF-7 xenograft was established in 4- to 6-weeks old female nude mice (Division of Comparative Medicine, the University of North Carolina at Chapel Hill) as described (PMID: 31221856). Mice were group housed (no more than five mice per cage) with air temperature 24 ± 3°C, humidity 60 ± 4%, and a 12-hours light/12-hours dark cycle. Food and water were provided ad libitum. The PET imaging studies were conducted when the tumor size was between 250-750 mm<sup>3</sup>. <sup>18</sup>F PET tracers were prepared from section 3.6

## Results of *in vivo* PET Imaging

The MCF-7 tumor-bearing mice received an intravenous injection of the  $^{18}\text{F}$ -PET agent ( $\sim 8.2$  MBq). At 1 h and 3 h post-injection, the animals were anesthetized using 2% isoflurane and subjected to 10 min static PET scan (SuperArgus 4R, SEDECAL, Madrid, Spain). The uptake values (percentage injected dose per gram) were calculated and reported as mean  $\pm$  SD averaged over  $n(n \geq 3)$  tumors. PET images were reconstructed into a single frame by OSEM 3D with random and scatter correction. The reconstructed PET images were analyzed using AMIDE (<http://amide.sourceforge.net/>) software (Supplementary Figure 139). Most of the PET tracers demonstrated initial prominent tumor uptake at 1h post-injection followed by washout at 3h while few tracers (**57- $^{18}\text{F}$ -COOH**, **60- $^{18}\text{F}$ -COOH**, **61- $^{18}\text{F}$ -COOH**) showed high and persistent retention in the MCF-7 tumor model. The *L*-configuration isomer (**L-61- $^{18}\text{F}$ -COOH**) shows higher tumor uptake and longer retention time than the *D*-isomer (**D-61- $^{18}\text{F}$ -COOH**). Besides the tumor accumulation of each tracer at a different time point, we calculated the tumor to muscle ratio to reflect the signal to noise for each tracer. All the  $^{18}\text{F}$ -labeled tyrosine analogs show similar uptake ratio between tumor and muscle except tracer **63- $^{18}\text{F}$ -COOH** which demonstrates relatively higher uptake ratio, especially at 1h post-injection, comparing to other tracers (Supplementary Figure 140).

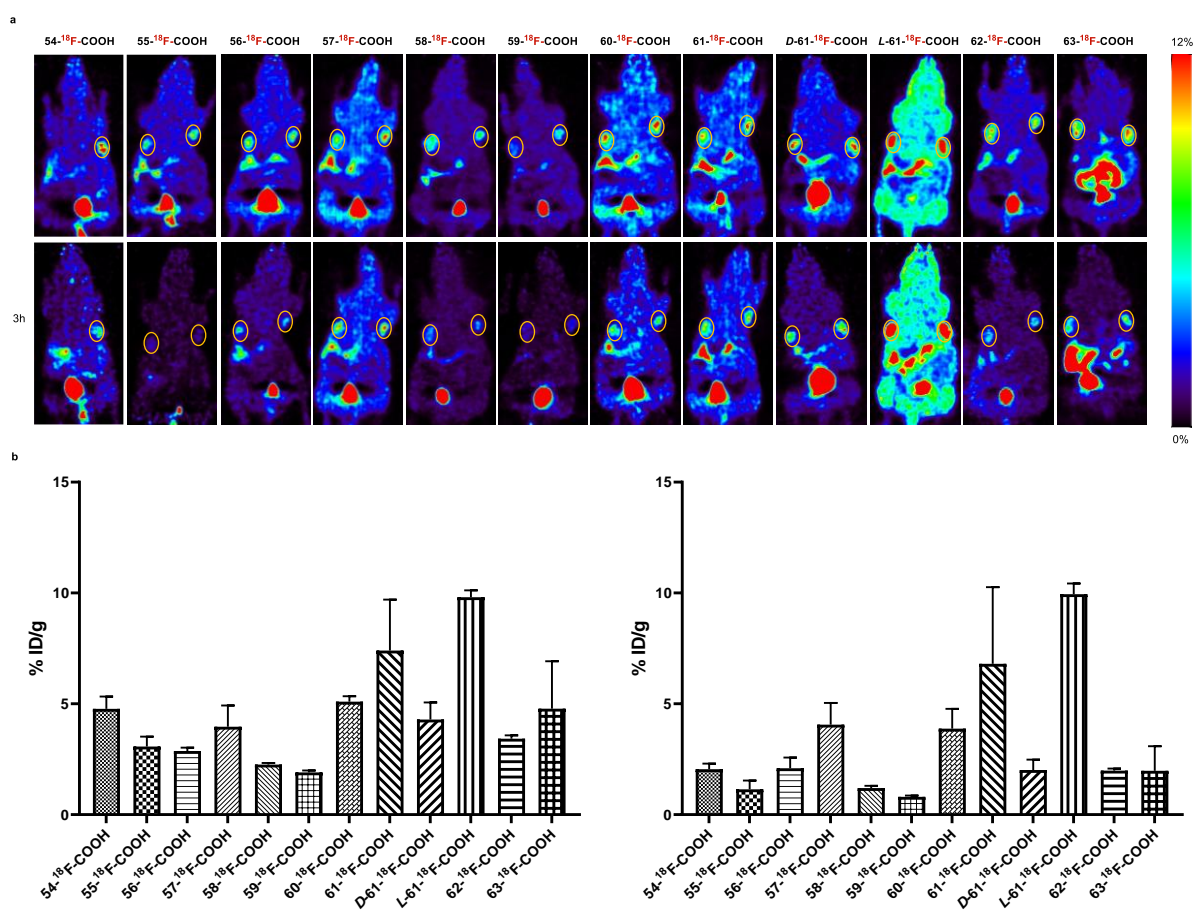

**Supplementary Figure 139. PET imaging study. a,** PET imaging of  $^{18}\text{F}$ -labeled tyrosines in the MCF7 tumor model system (tumors were circled in the pictures). **b,** Tumor uptake (percentage injected dose per gram) of each tracer at 1h post-injection (left) and 3h post-injection (right). Tumor uptake of the each tracer from **54- $^{18}\text{F}$ -COOH** to **63- $^{18}\text{F}$ -COOH** at 1h and 3h post-injection are  $4.77\pm 0.55\%$  (n=3),  $2.05\pm 0.25\%$  (n=3);  $3.07\pm 0.44\%$  (n=4),  $1.14\pm 0.39\%$  (n=4);  $2.87\pm 0.15\%$  (n=4),  $2.09\pm 0.49\%$  (n=4);  $3.96\pm 0.96\%$  (n=7),  $4.06\pm 0.98\%$  (n=4);  $2.26\pm 0.07\%$  (n=4),  $1.20\pm 0.10\%$  (n=3);  $1.91\pm 0.08\%$  (n=4),  $0.80\pm 0.06\%$  (n=4);  $5.10\pm 0.25\%$  (n=4),  $3.88\pm 0.90\%$  (n=4);  $7.41\pm 2.29\%$  (n=10),  $6.80\pm 3.46\%$  (n=10);  $4.29\pm 0.77\%$  (n=6),  $2.02\pm 0.47\%$  (n=6);  $9.81\pm 0.30\%$  (n=6),  $9.95\pm 0.48\%$  (n=6);  $3.43\pm 0.15\%$  (n=3),  $1.98\pm 0.10\%$  (n=3);  $4.78\pm 2.14\%$  (n=6),  $1.98\pm 1.11\%$  (n=6), respectively.

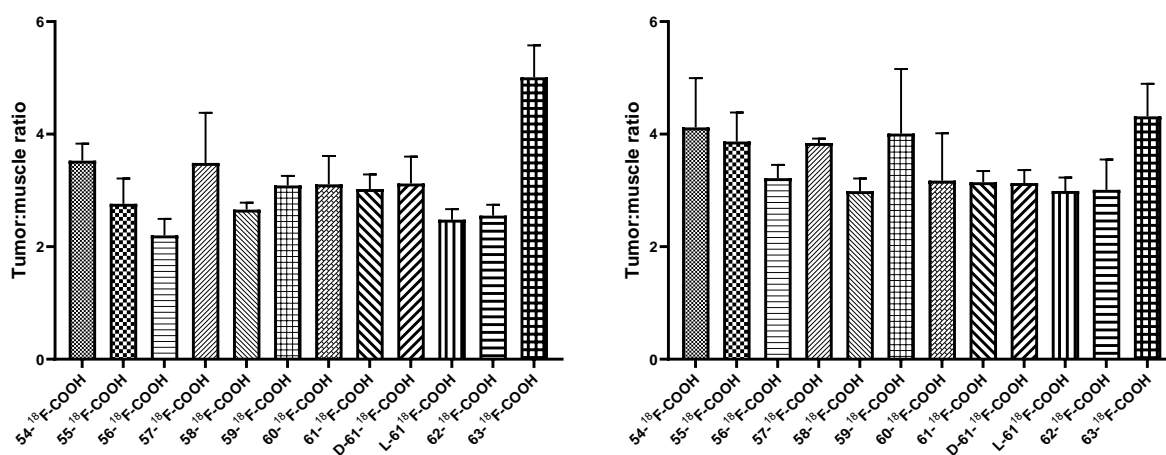

**Supplementary Figure 140. Tracer uptake ratio between tumor and muscle of each tracer at 1h (left) and 3h (right) post-injection.** The ratios were calculated and reported as mean  $\pm$  SD averaged over n (n  $\geq$  3) tumors and muscles. The ratios from **54- $^{18}\text{F}$ -COOH** to **63- $^{18}\text{F}$ -COOH** at 1h and 3h post-injection are  $3.53\pm 0.30$  (n=3),  $4.12\pm 0.88$  (n=3);  $2.76\pm 0.45$  (n=4),  $3.87\pm 0.52$  (n = 4);  $2.20\pm 0.29$  (n = 4),  $3.22\pm 0.24$  (n=4) ;  $3.49 \pm 0.89$  (n=7),  $3.84 \pm 0.08$  (n=4);  $2.66 \pm 0.12$  (n=4),  $2.99 \pm 0.23$  (n=3);  $3.09\pm 0.17$  (n=4),  $4.01\pm 1.15$  (n=4);  $3.11\pm 0.50$ ,  $3.17\pm 0.84$  (n=4);  $2.81\pm 0.34$ (n=10),  $3.04\pm 0.49$  (n=10);  $3.12\pm 0.48$  (n=6),  $3.13\pm 0.23$ (n=6);  $2.45\pm 0.19$  (n=6),  $2.99\pm 0.24$  (n=6);  $2.55\pm 0.19$  (n=3),  $3.01\pm 0.54$  (n=4);  $5.01\pm 0.57$  (n=6)  $4.32\pm 0.58$  (n=6), respectively.

## 5. Reference

- 1 Guo, Y. *et al.* Practical Ligand-Free Copper-Catalysed Short-Chain Alkoxylation of Unactivated Aryl Bromides. *Eur. J. Org. Chem.* **2015**, 4744–4755 (2015).
- 2 Sevov, C. S. & Hartwig, J. F. Iridium-Catalyzed, Intermolecular Hydroetherification of Unactivated Aliphatic Alkenes with Phenols. *J. Am. Chem. Soc.* **135**, 9303–9306 (2013).
- 3 Bartoli, G. *et al.* Unusual and unexpected reactivity of t-butyl dicarbonate (Boc<sub>2</sub>O) with alcohols in the presence of magnesium perchlorate. A new and general route to t-butyl ethers. *Org. Lett.* **7**, 427–430, (2005).
- 4 Hirano, M., Yakabe, S., Monobe, H. & Morimoto, T. Selective aromatic chlorination of activated arenes with sodium chlorite, (salen)manganese(III) complex, and alumina in dichloromethane. *Can. J. Chem.* **75**, 1905–1912, (1997).
- 5 Davidson, J. P., Lubman, O., Rose, T., Waksman, G. & Martin, S. F. Calorimetric and structural studies of 1,2,3-trisubstituted cyclopropanes as conformationally constrained peptide inhibitors of Src SH2 domain binding. *J. Am. Chem. Soc.* **124**, 205–215 (2002).
- 6 Nicolaou, K. C. *et al.* Total Synthesis and Structural Revision of Viridicatumtoxin B. *Angew. Chem. Int. Ed.* **52**, 8736–8741 (2013).
- 7 Maibunkaew, T., Thongsornkleeb, C., Tummatorn, J., Bunrit, A. & Ruchirawat, S. Practical and Metal-Free Electrophilic Aromatic Halogenation by Interhalogen Compounds Generated In Situ from N-Halosuccinimide and Catalytic TMSCl. *Synlett* **25**, 1769–1775 (2014).
- 8 Chun, J. H. & Pike, V. W. Single-step syntheses of no-carrier-added functionalized [<sup>18</sup>F]fluoroarenes as labeling synthons from diaryliodonium salts. *Org. Biomol. Chem.* **11**, 6300–6306 (2013).
- 9 Farmer, J. L., Froese, R. D. J., Lee-Ruff, E. & Organ, M. G. Solvent Choice and Kinetic Isotope Effects (KIEs) Dramatically Alter Regioselectivity in the Directed ortho Metalation (DoM) of 1,5-Dichloro-2,4-dimethoxybenzene. *Chem.–Eur. J.* **21**, 1888–1893 (2015).
- 10 Bugarin, A. & Connell, B. T. Chiral nickel(II) and palladium(II) NCN-pincer complexes based on substituted benzene: Synthesis, structure, and lewis acidity. *Organometallics* **27**, 4357–4369 (2008).
- 11 Tang, R. J., Milcent, T. & Crousse, B. Regioselective Halogenation of Arenes and Heterocycles in Hexafluoroisopropanol. *J. Org. Chem.* **83**, 930–938 (2018).
- 12 Lafrance, M., Gorelsky, S. I. & Fagnou, K. High-yielding palladium-catalyzed intramolecular alkane arylation: Reaction development and mechanistic studies. *J. Am. Chem. Soc.* **129**, 14570–14571 (2007).
- 13 Rana, S., Bag, S., Patra, T. & Maiti, D. Catalytic Electrophilic Halogenations and Haloalkoxylations by Non-Heme Iron Halides. *Adv. Synth. Catal.* **356**, 2453–2458, (2014).
- 14 Jiang, M., Yang, H. J., Li, Y., Jia, Z. Y. & Fu, H. Metal-free synthesis of substituted phenols from arylboronic acids in water at room temperature. *Chin. Chem. Lett.* **25**, 715–719 (2014).
- 15 Tay, N. E. S. *et al.* <sup>19</sup>F- and <sup>18</sup>F-arene deoxyfluorination via organic photoredox-catalysed polarity-reversed nucleophilic aromatic substitution. *Nat. Catal.* **3**, 734–742, (2020).
- 16 Jiang, L. Q. Copper/*N,N*-Dimethylglycine Catalyzed Goldberg Reactions Between Aryl Bromides and Amides, Aryl Iodides and Secondary Acyclic Amides. *Molecules* **19**, 13448–13460 (2014).
- 17 Gan, Z. J., Hu, B., Song, Q. & Xu, Y. G. Convenient Chlorination of Some Special Aromatic Compounds Using N-Chlorosuccinimide. *Synthesis* **44**, 1074–1078 (2012).

- 18 Owens, E. A. *et al.* Near-Infrared Illumination of Native Tissues for Image-Guided Surgery. *J. Med. Chem.* **59**, 5311–5323 (2016).
- 19 Taylor, N. J. *et al.* Derisking the Cu-Mediated <sup>18</sup>F-Fluorination of Heterocyclic Positron Emission Tomography Radioligands. *J. Am. Chem. Soc.* **139**, 8267–8276 (2017).
- 20 Ye, M. C. *et al.* A robust protocol for Pd(II)-catalyzed C-3 arylation of (1H) indazoles and pyrazoles: total synthesis of nigellidine hydrobromide. *Chem. Sci.* **4**, 2374–2379 (2013).
- 21 Chen, W. *et al.* Direct arene C–H fluorination with <sup>18</sup>F<sup>-</sup> via organic photoredox catalysis. *Science* **364**, 1170–1174 (2019).
- 22 Wang, L. L. *et al.* Design and synthesis of novel artemisinin hybrids with potent activities against human colorectal cancer cells *in vitro* and *in vivo*. *Eur. J. Med. Chem.* **194**, 111665 (2020).
- 23 Basu, S. *et al.* Design, Synthesis of Novel, Potent, Selective, Orally Bioavailable Adenosine A2A Receptor Antagonists and Their Biological Evaluation. *J. Med. Chem.* **60**, 681–694 (2017).
- 24 Chen, Y. *et al.* NO-donating tacrine derivatives as potential butyrylcholinesterase inhibitors with vasorelaxation activity. *Bioorg. Med. Chem. Lett.* **23**, 3162–3165 (2013).
- 25 Wang, P. *et al.* Ligand-accelerated non-directed C–H functionalization of arenes. *Nature* **551**, 489–493 (2017).
- 26 Preshlock, S. *et al.* Enhanced copper-mediated <sup>18</sup>F-fluorination of aryl boronic esters provides eight radiotracers for PET applications. *Chem. Commun.* **52**, 8361–8364 (2016).
- 27 Radomkit, S. *et al.* Pt(IV)-catalyzed generation and [4+2]-cycloaddition reactions of o-quinone methides. *Tetrahedron* **67**, 3904–3914 (2011).
- 28 Tredwell, M. *et al.* A General Copper-Mediated Nucleophilic <sup>18</sup>F-Fluorination of Arenes. *Angew. Chem. Int. Ed.* **53**, 7751–7755 (2014).
- 29 Fedorova, O. S. *et al.* An approach to the asymmetric synthesis of <sup>18</sup>F-labeled analog of *L*-threo-3,4-dihydroxyphenylserine (6-*L*-threo-[<sup>18</sup>F]FDOPS) – a new radiotracer for visualization of norepinephrine transporters by positron emission tomography. *Russ. Chem. Bull.* **63**, 1169–1177 (2014).

6. NMR spectra ( $^1\text{H}$  NMR,  $^{13}\text{C}$  NMR,  $^{19}\text{F}$  NMR)

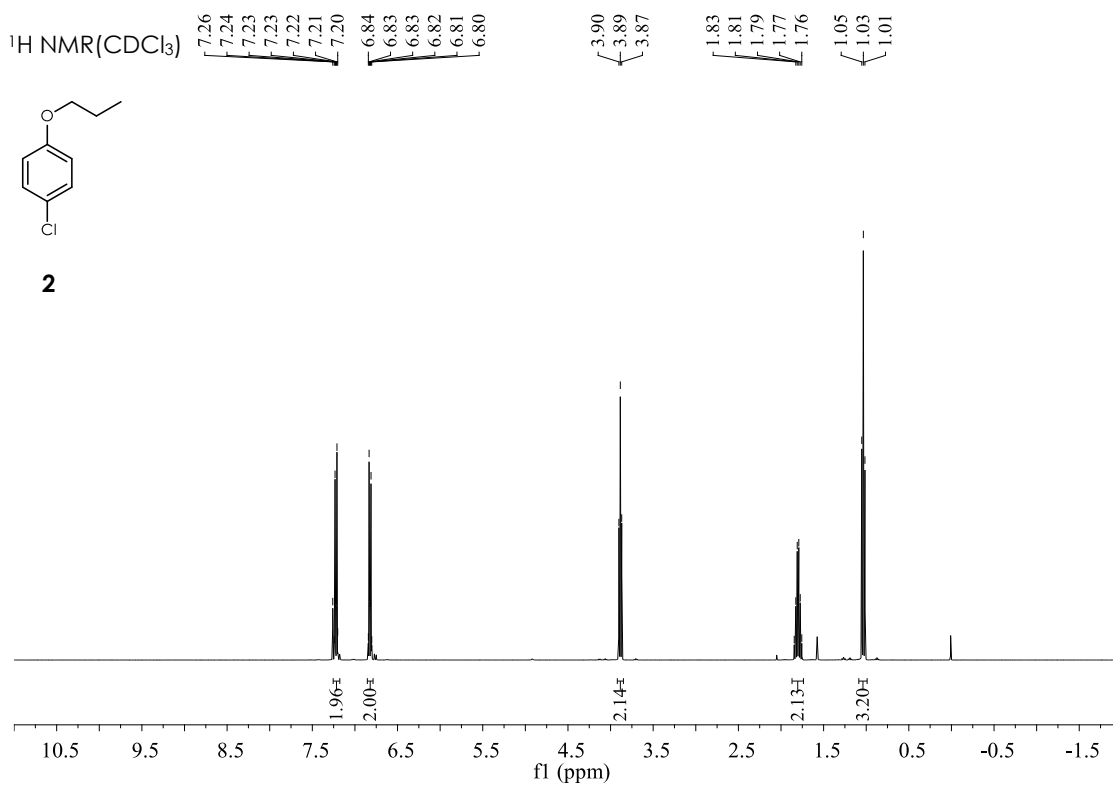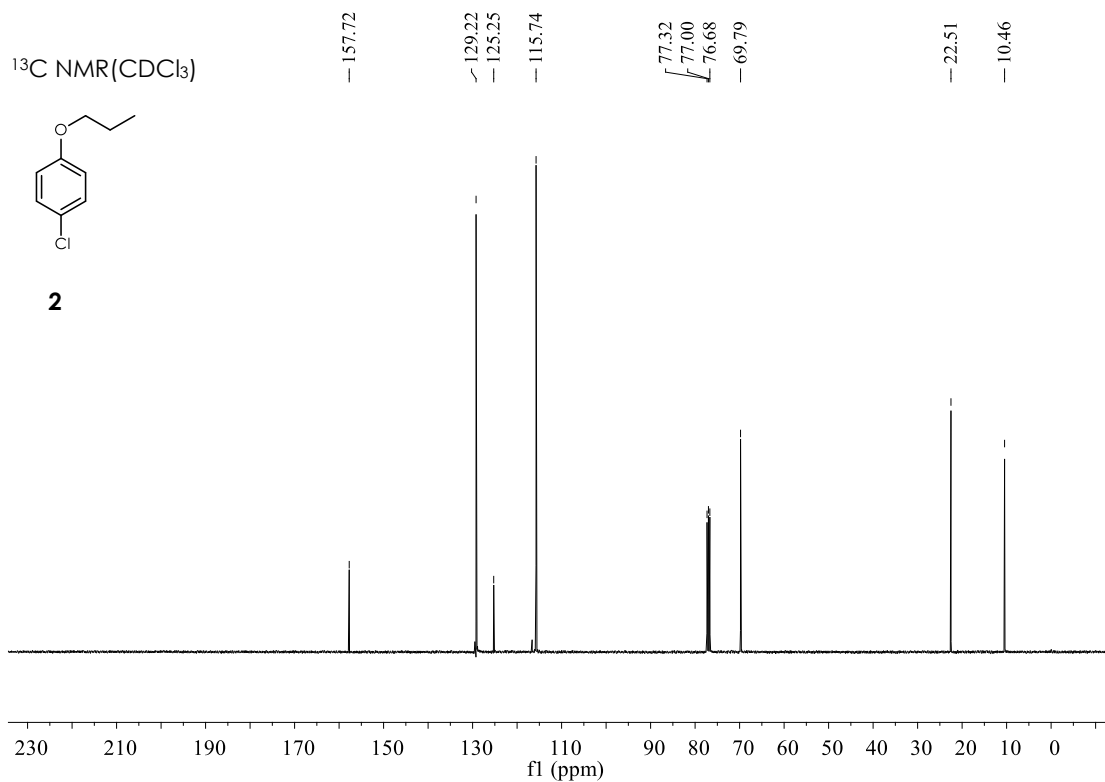



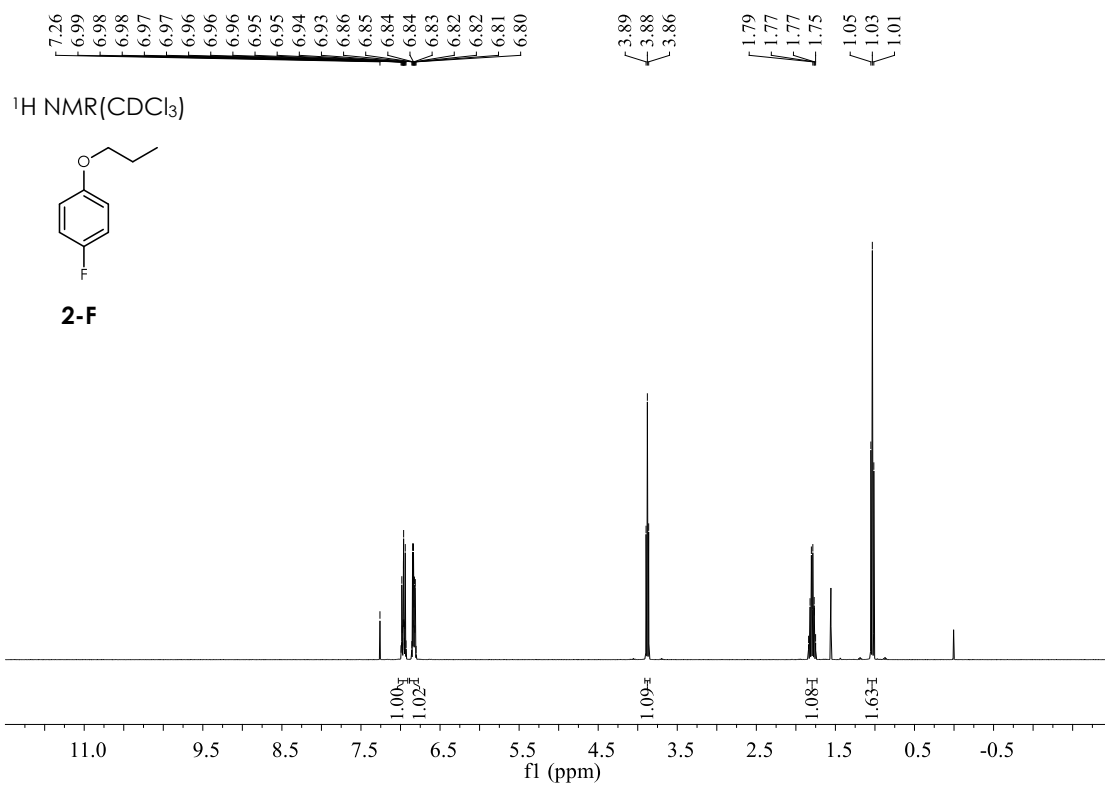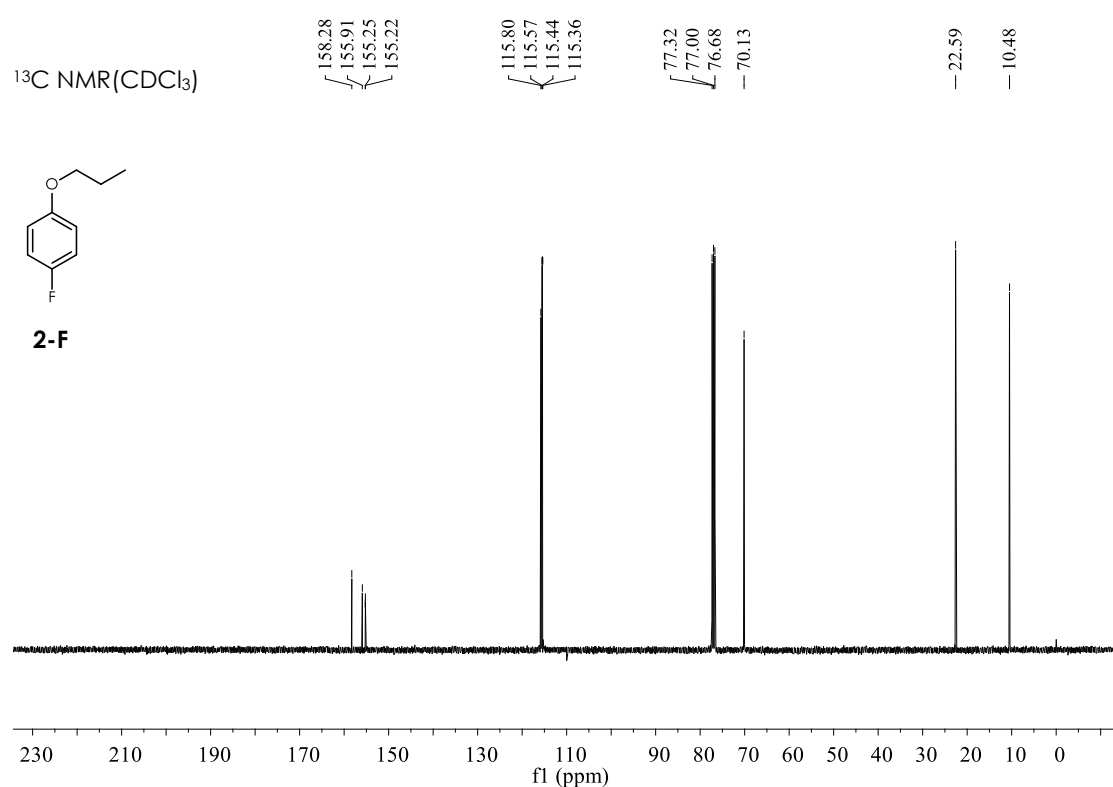

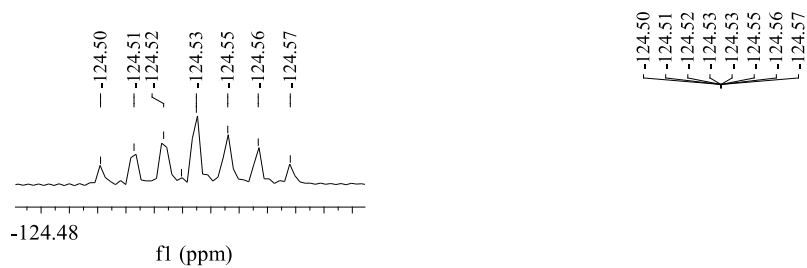

$^{19}\text{F}$  NMR ( $\text{CDCl}_3$ )

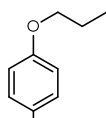

**2-F**

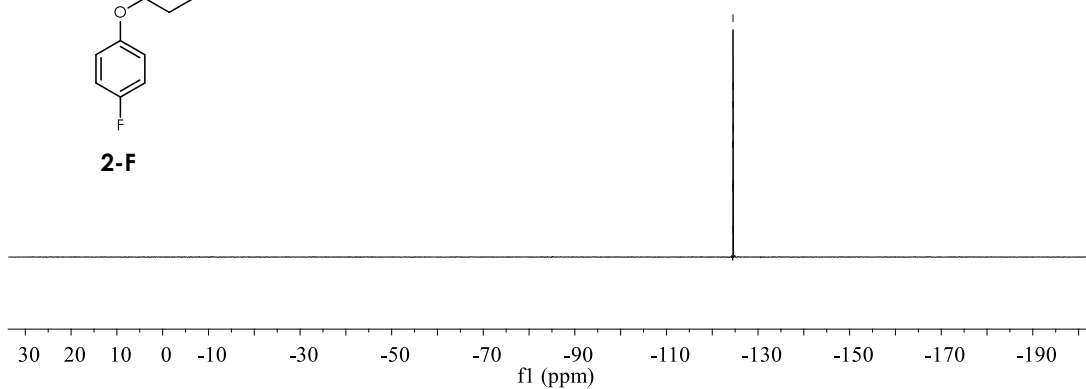

$^1\text{H}$  NMR ( $\text{CDCl}_3$ )

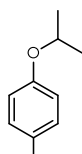

**3**

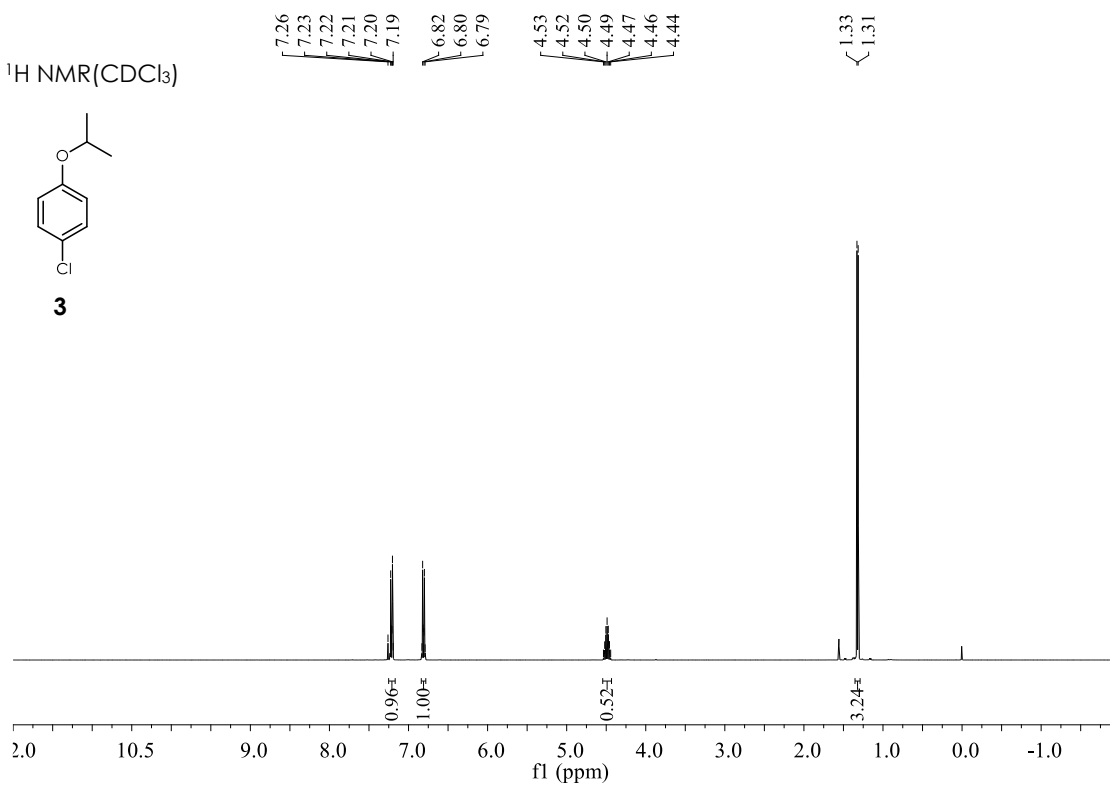

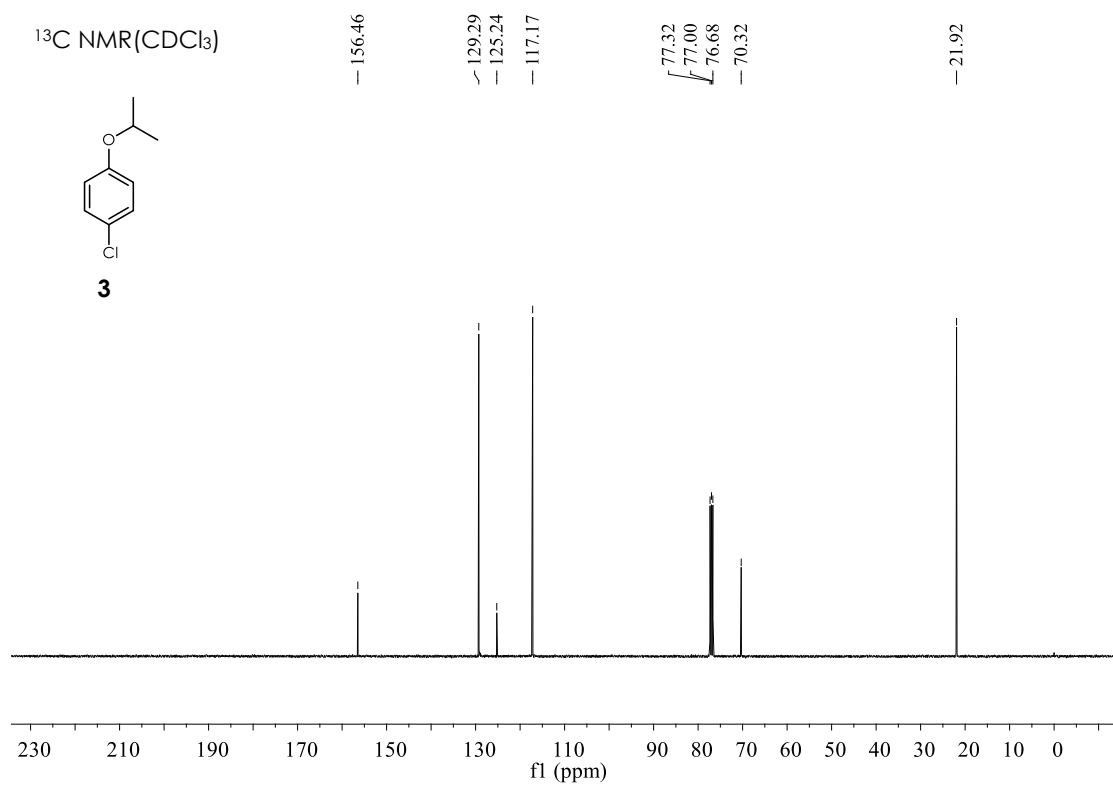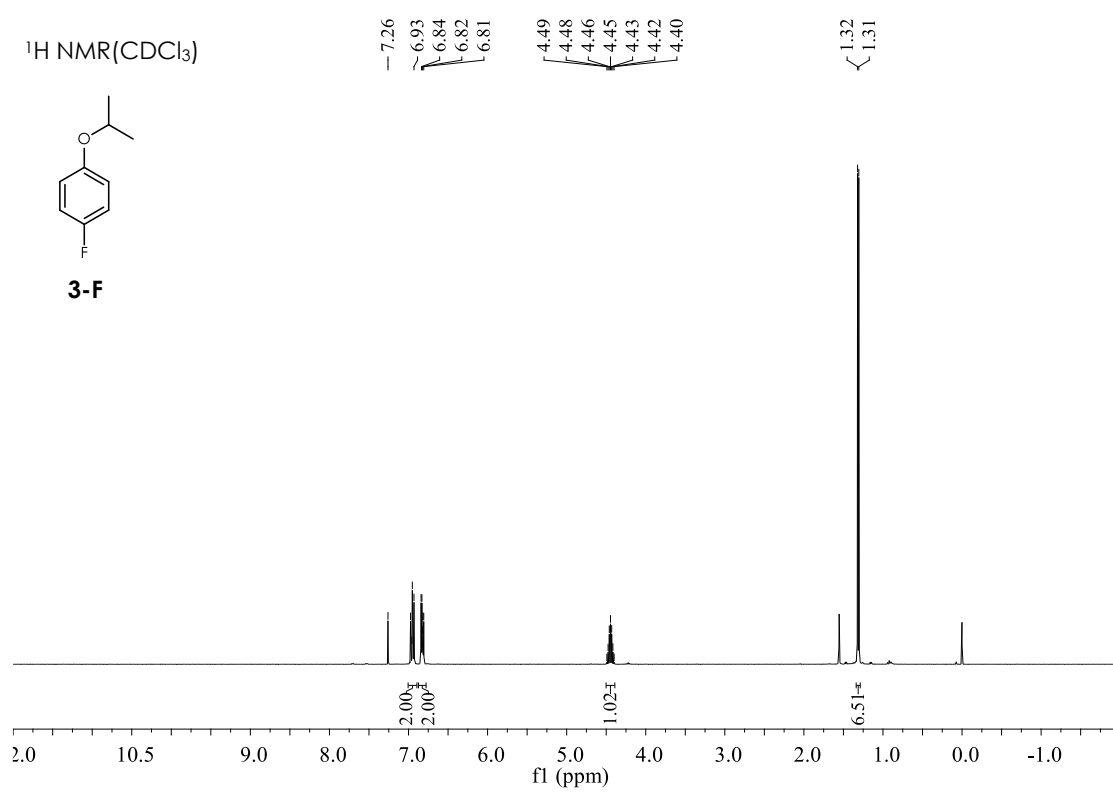

<sup>13</sup>C NMR(CDCl<sub>3</sub>)

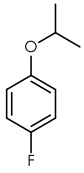

**3-F**

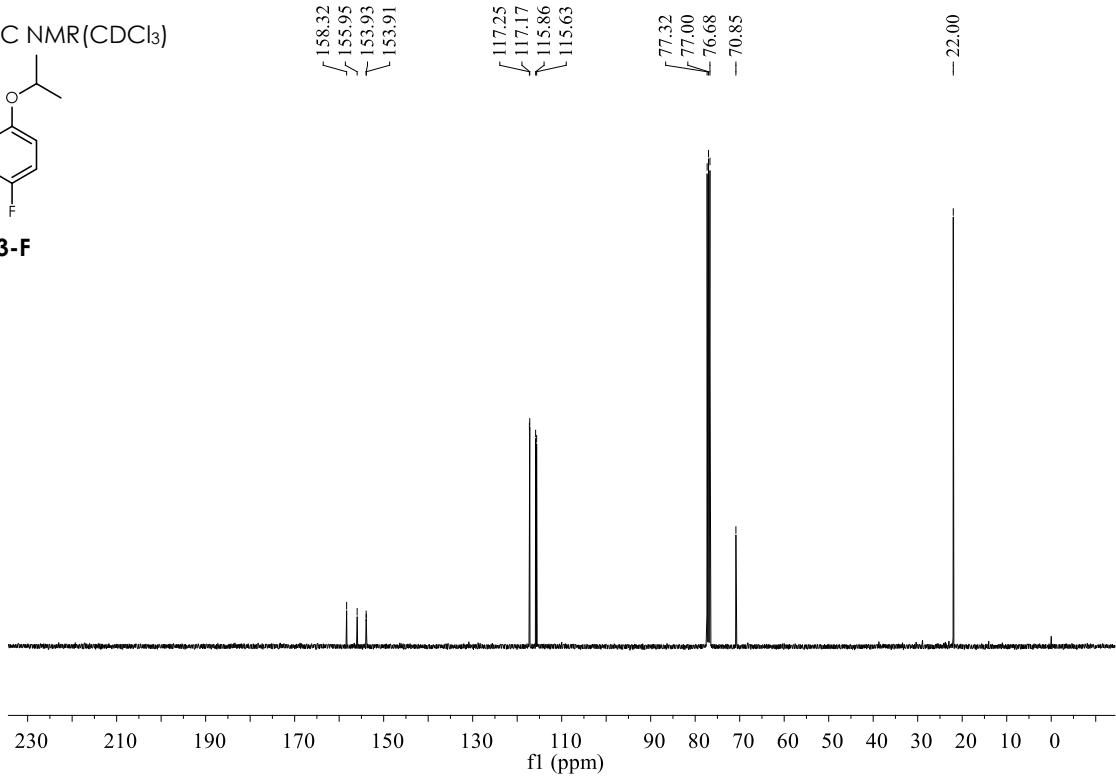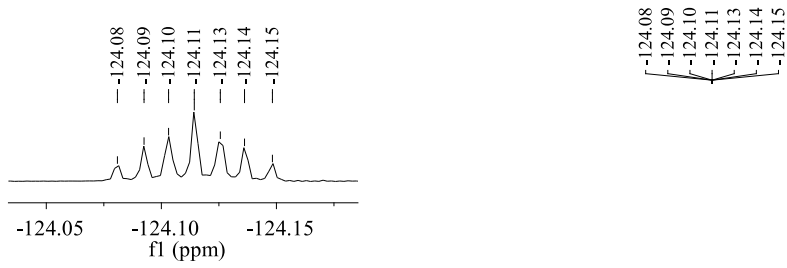

<sup>19</sup>F NMR(CDCl<sub>3</sub>)

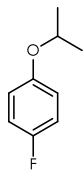

**3-F**

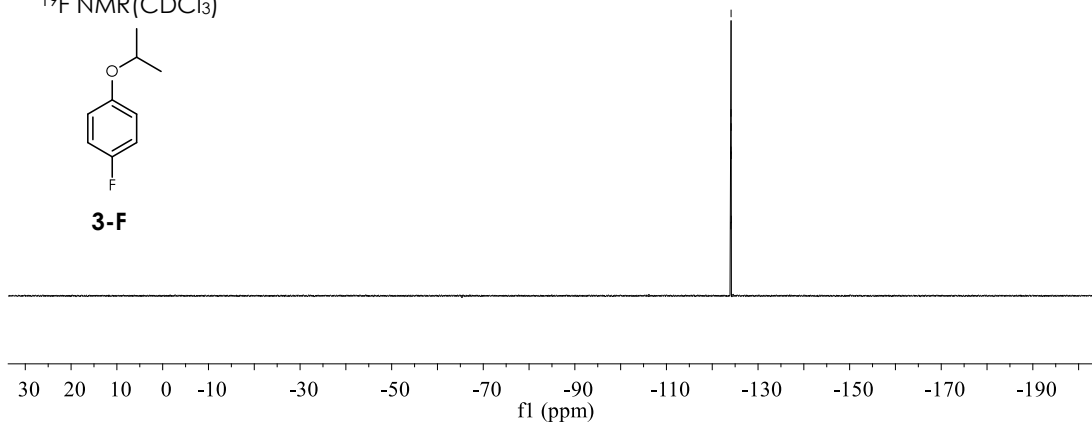

$^1\text{H NMR}(\text{CDCl}_3)$

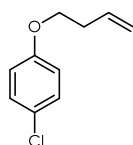

**4**

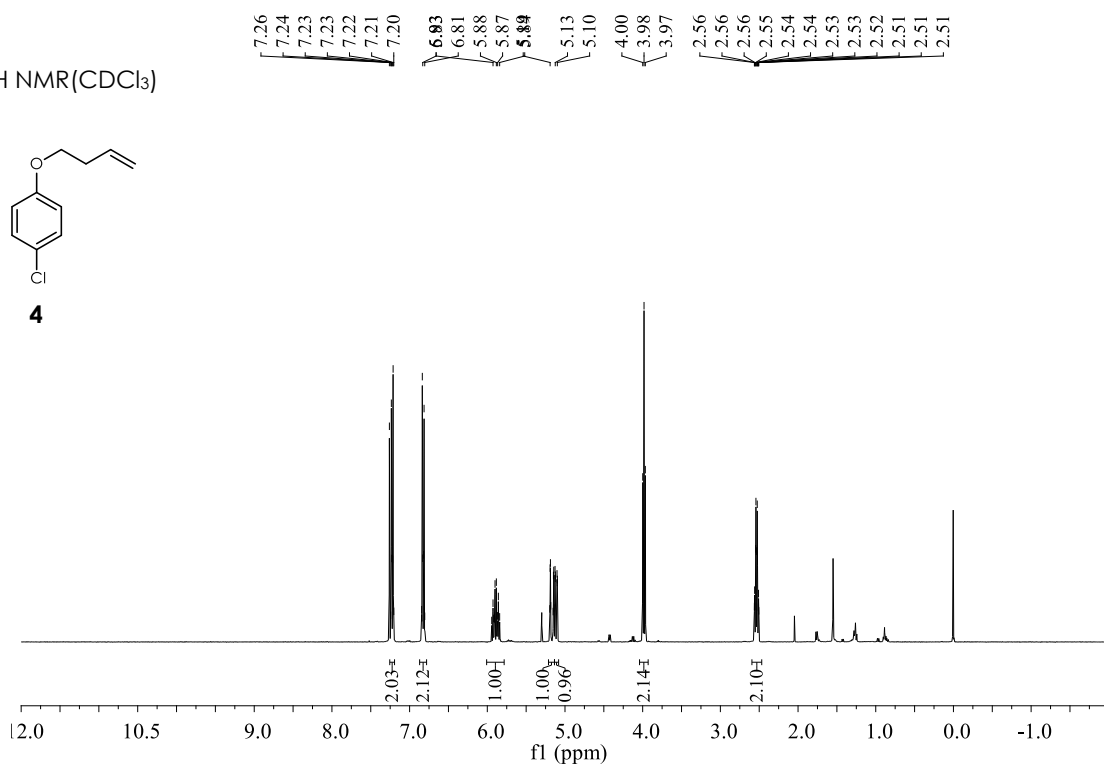

$^{13}\text{C NMR}(\text{CDCl}_3)$

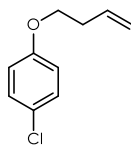

**4**

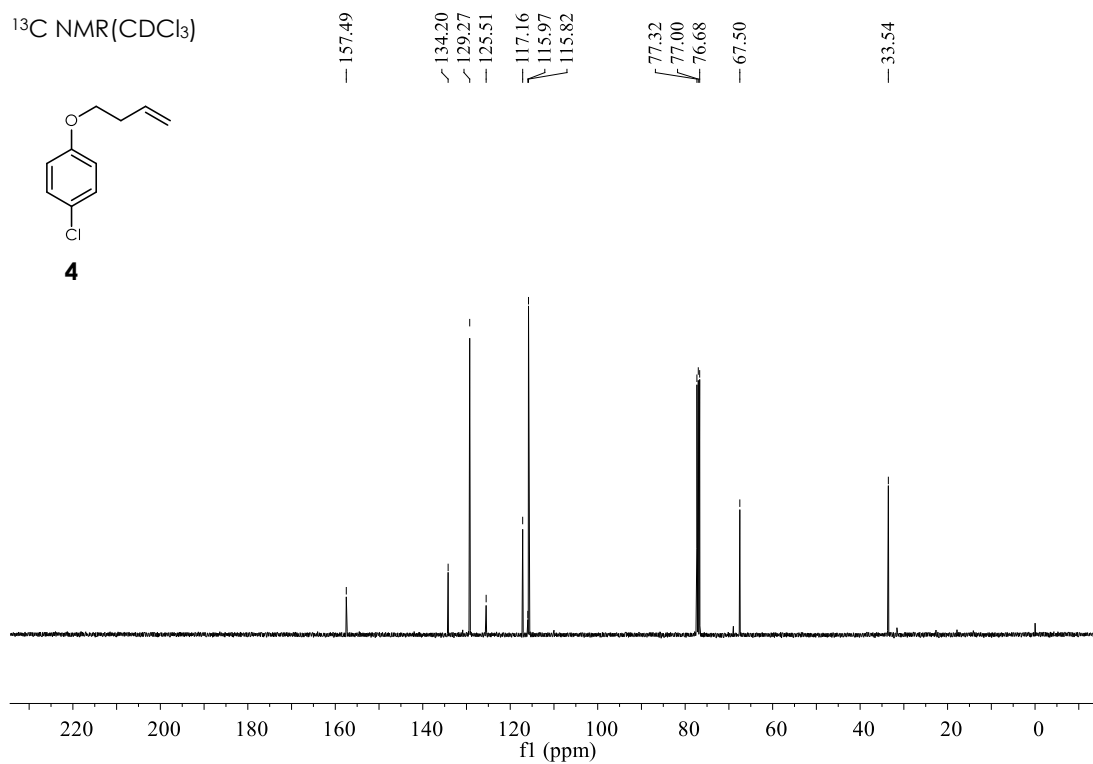

7.00  
6.99  
6.98  
6.98  
6.96  
6.95  
6.95  
6.94  
6.93  
6.86  
6.85  
6.85  
6.84  
6.84  
6.83  
6.83  
6.82  
6.81  
5.89  
5.88  
5.89  
5.13  
5.10  
3.99  
3.98  
3.96  
2.56  
2.56  
2.55  
2.54  
2.54  
2.54  
2.53  
2.52  
2.52  
2.51  
2.51  
2.50

<sup>1</sup>H NMR(CDCl<sub>3</sub>)

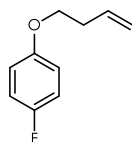

**4-F**

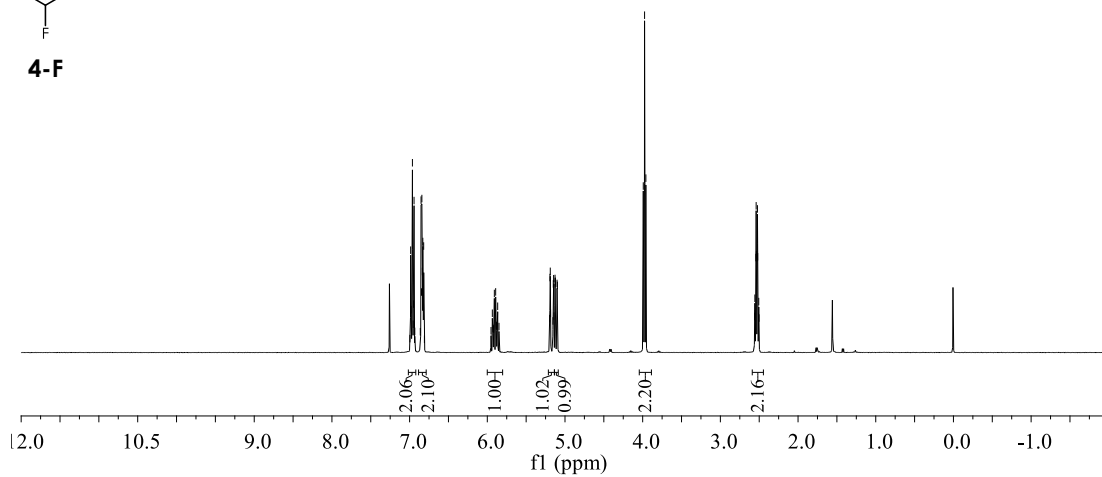

<sup>13</sup>C NMR(CDCl<sub>3</sub>)

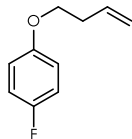

**4-F**

158.39  
156.03  
155.00  
154.98  
-134.33  
117.06  
115.84  
115.61  
115.57  
115.49  
77.32  
77.00  
76.68  
-67.86  
-33.64

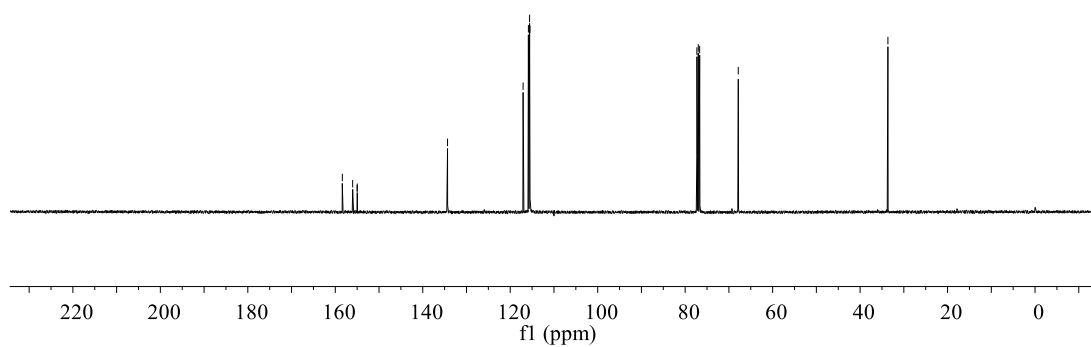

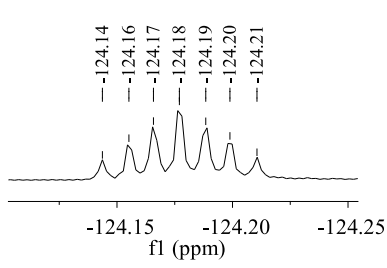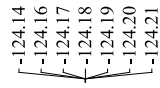

<sup>19</sup>F NMR (CDCl<sub>3</sub>)

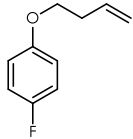

**4-F**

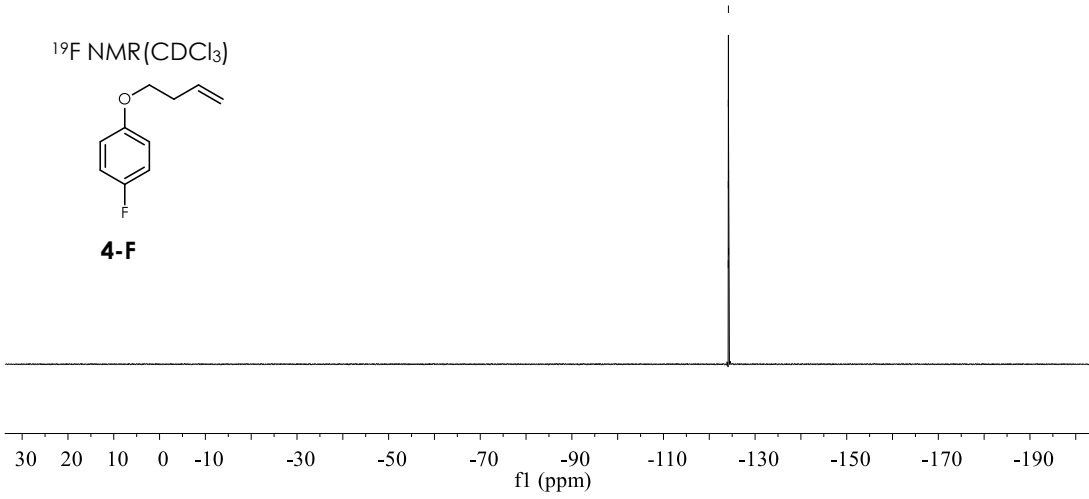

<sup>1</sup>H NMR (CDCl<sub>3</sub>)

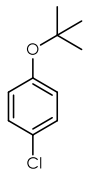

**5-Cl**

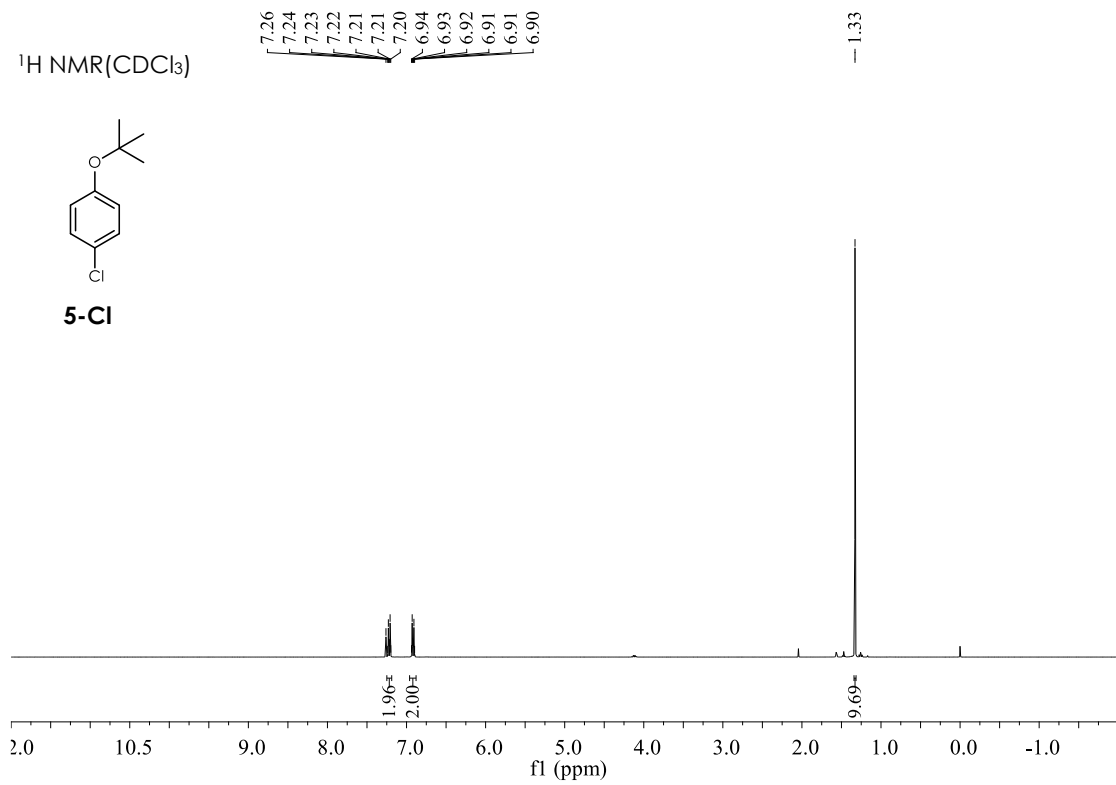

$^{13}\text{C}$  NMR ( $\text{CDCl}_3$ )

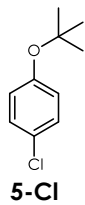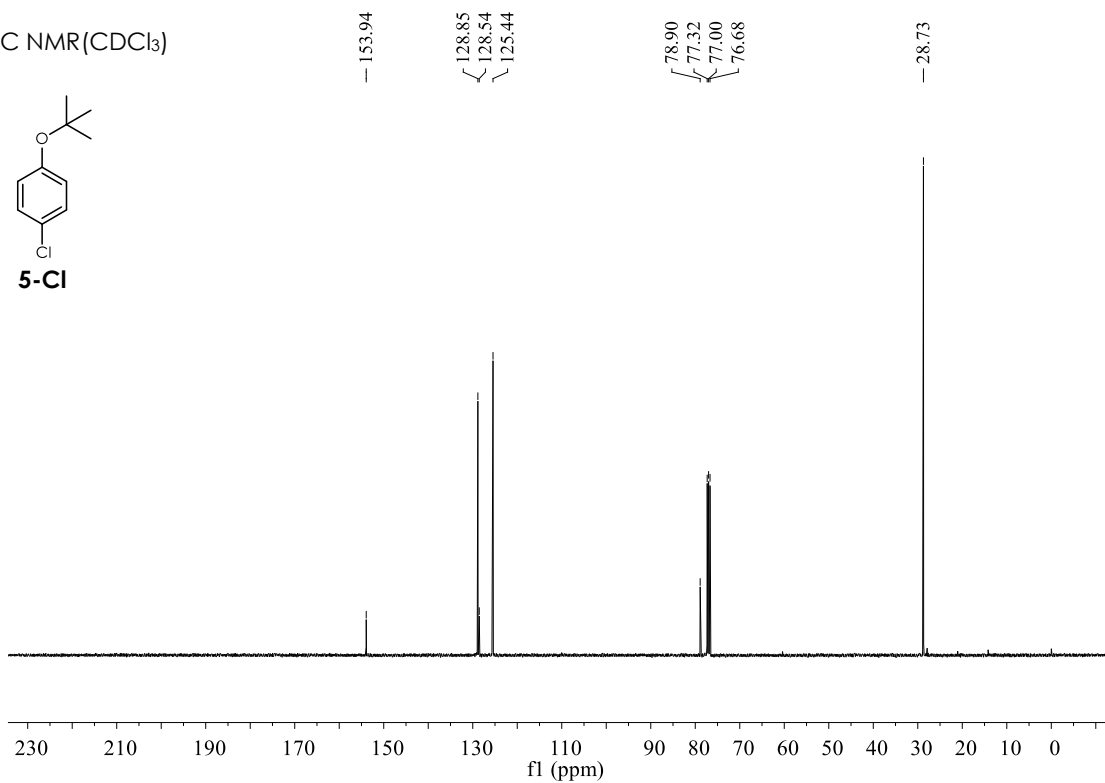

$^1\text{H}$  NMR ( $\text{CDCl}_3$ )

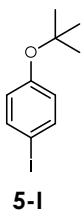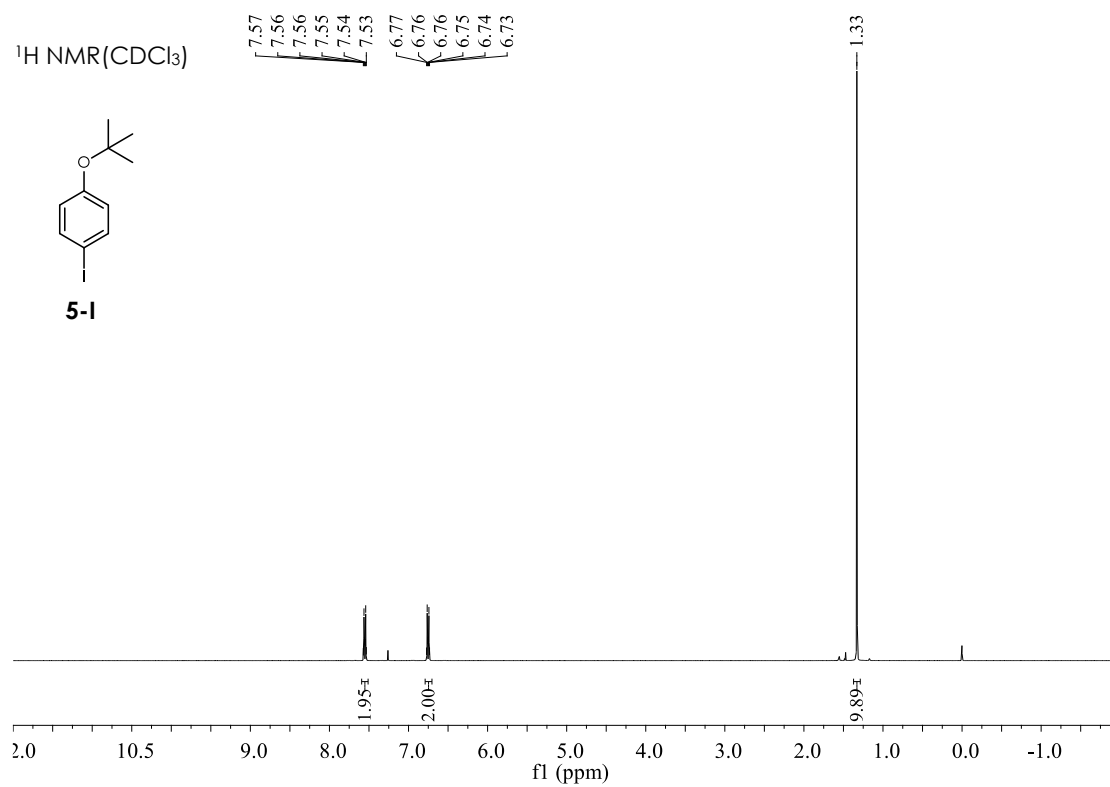



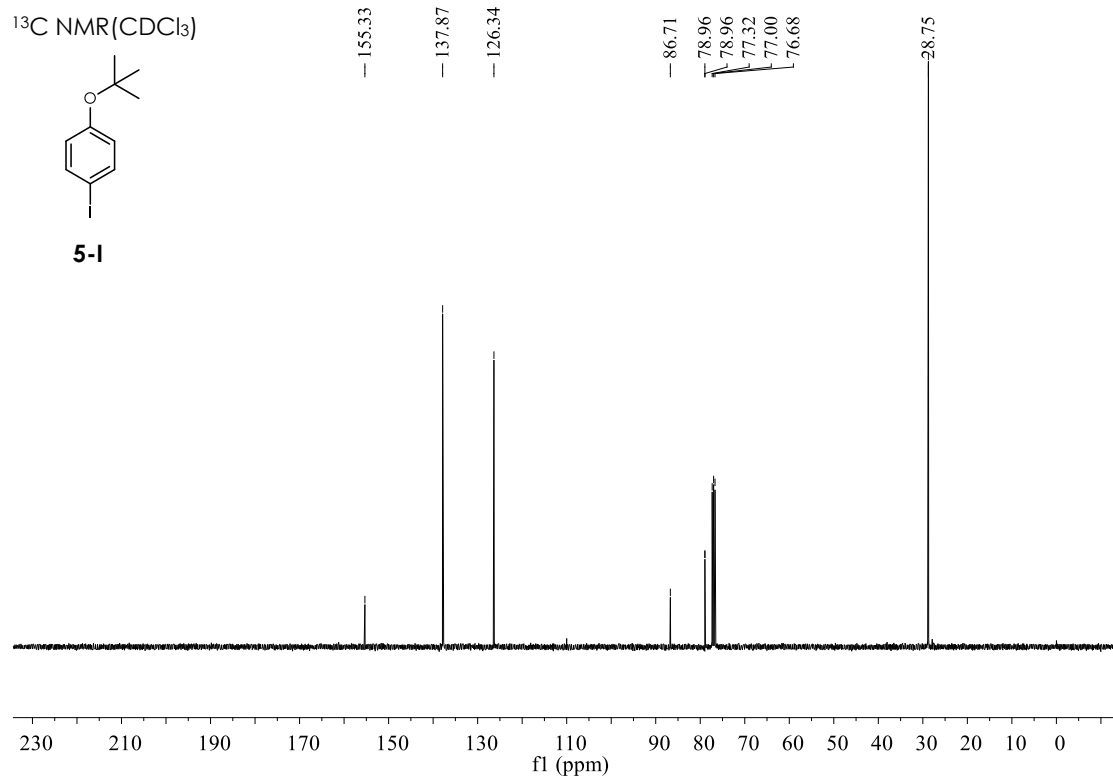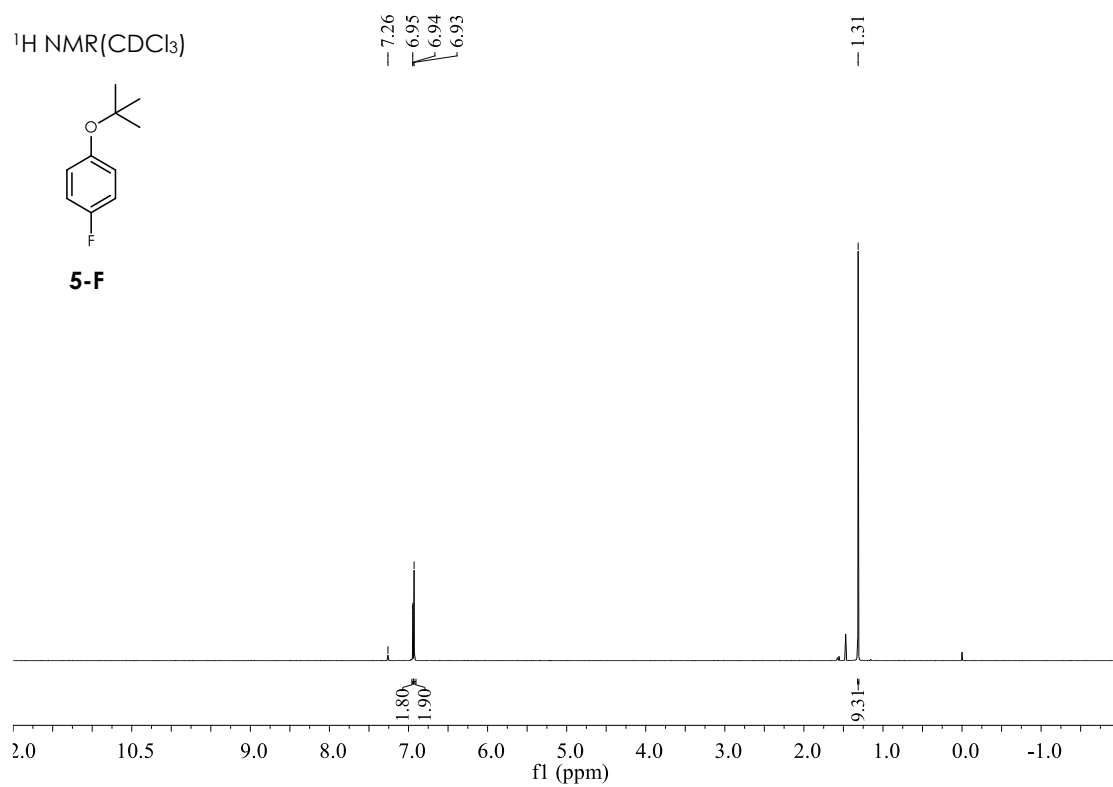

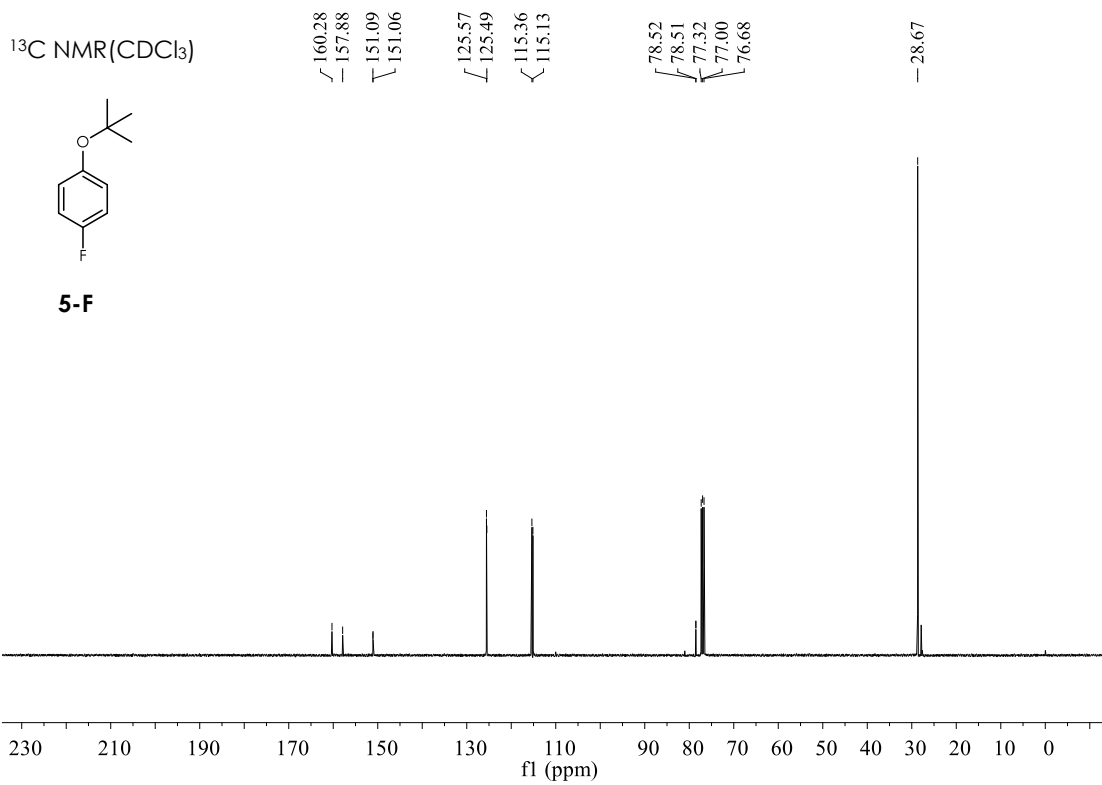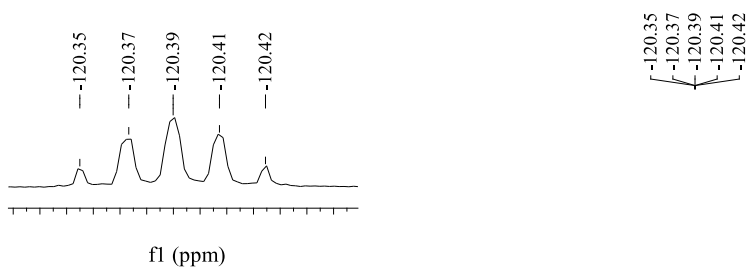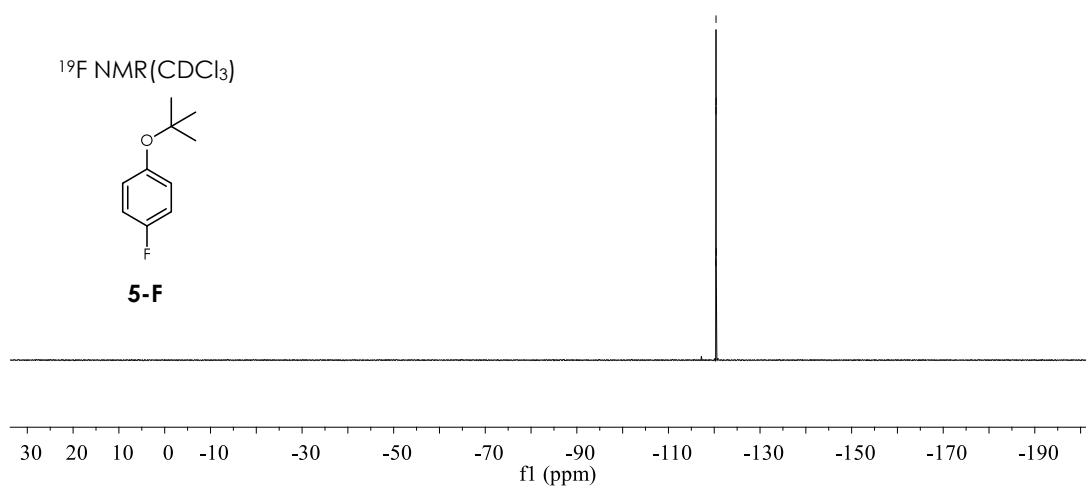

<sup>1</sup>H NMR(CDCl<sub>3</sub>)

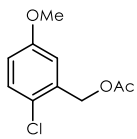

**8**

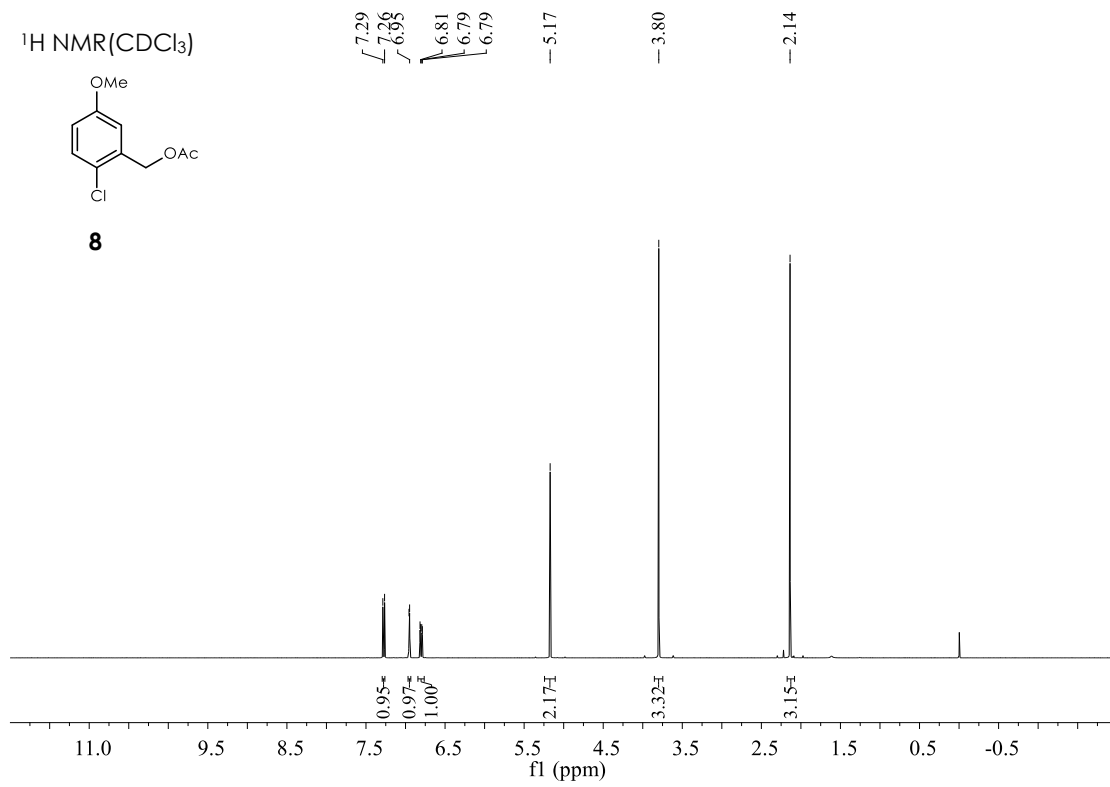

<sup>13</sup>C NMR(CDCl<sub>3</sub>)

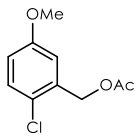

**8**

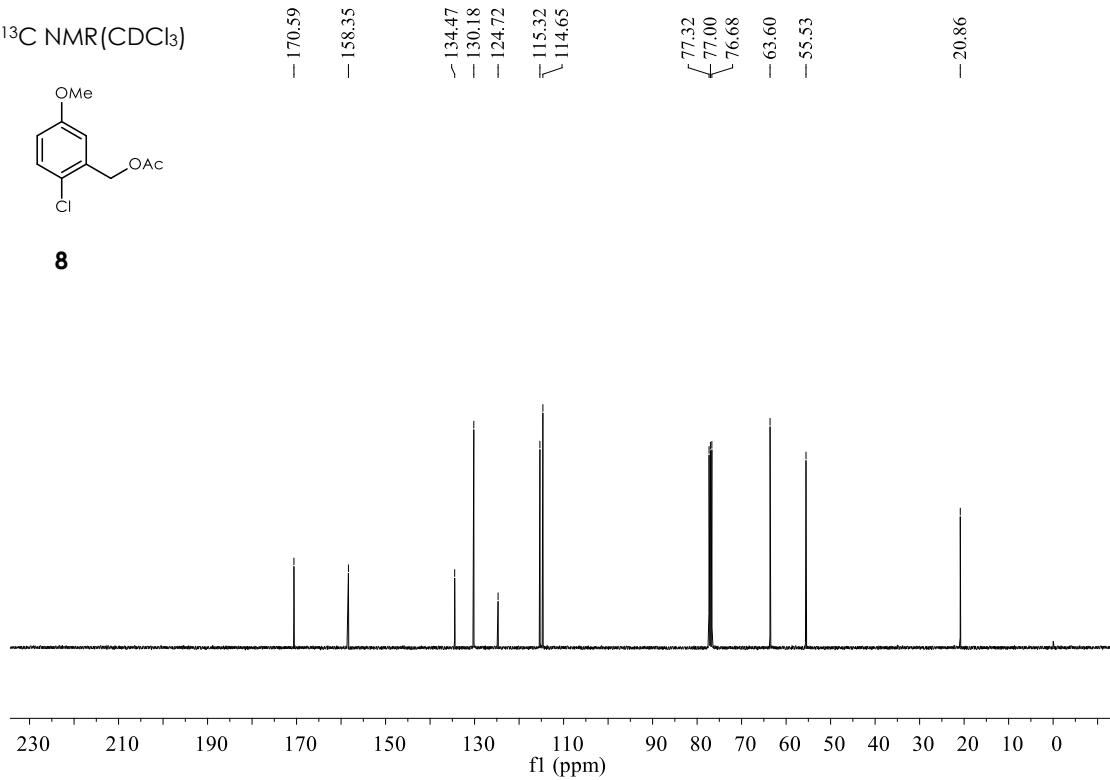

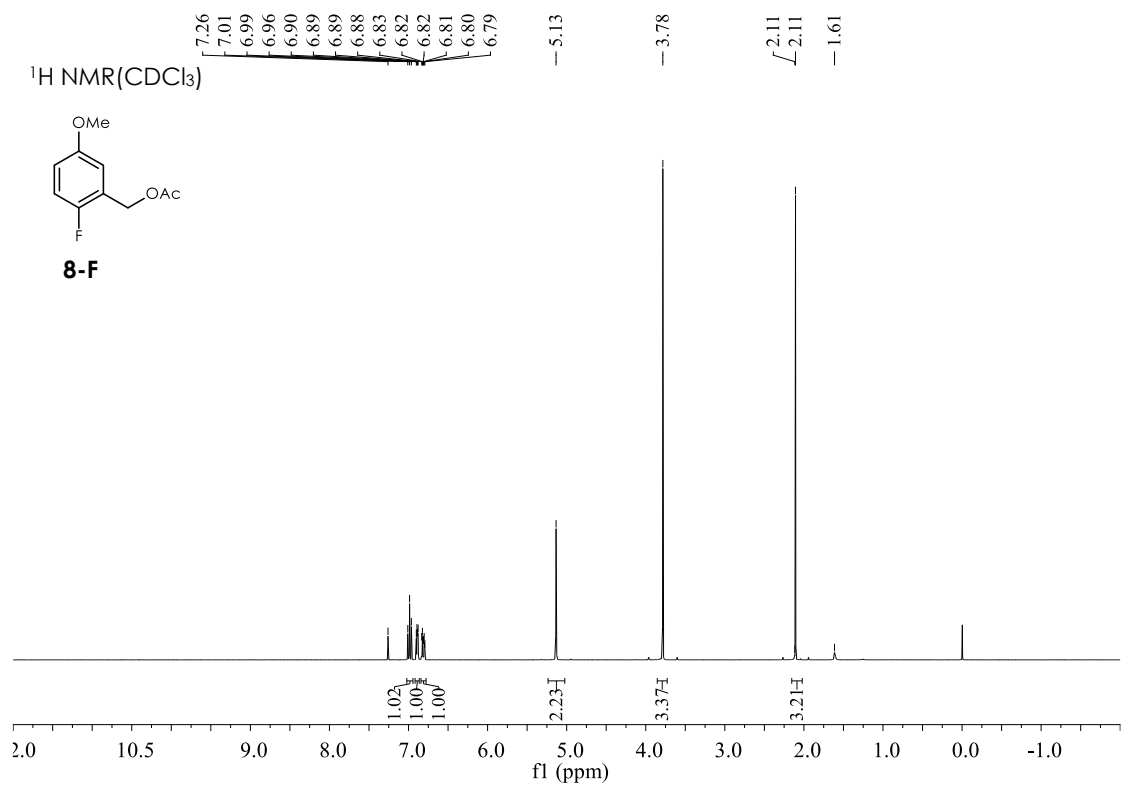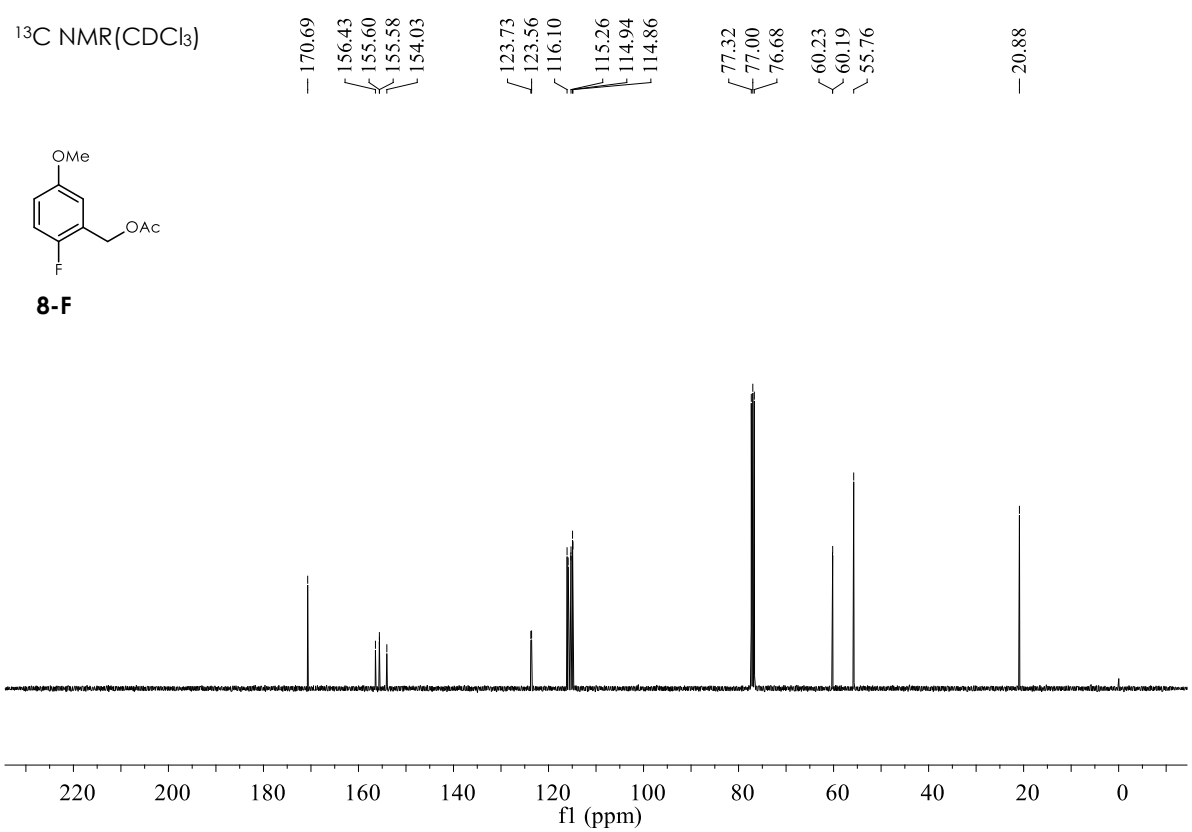

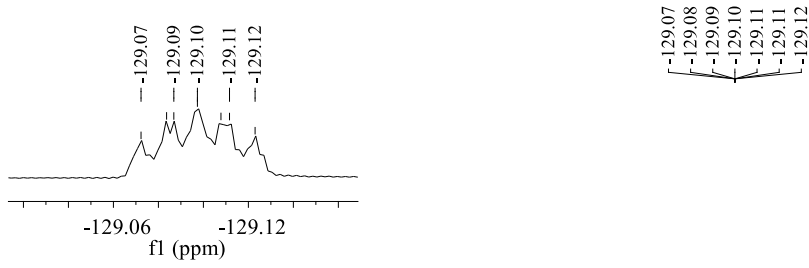

<sup>19</sup>F NMR(CDCl<sub>3</sub>)

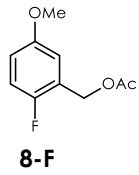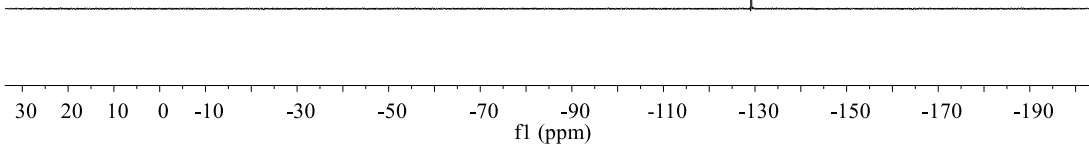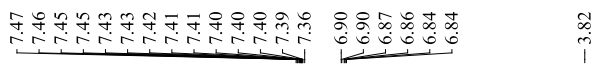

<sup>1</sup>H NMR(CDCl<sub>3</sub>)

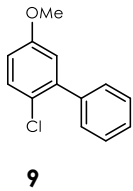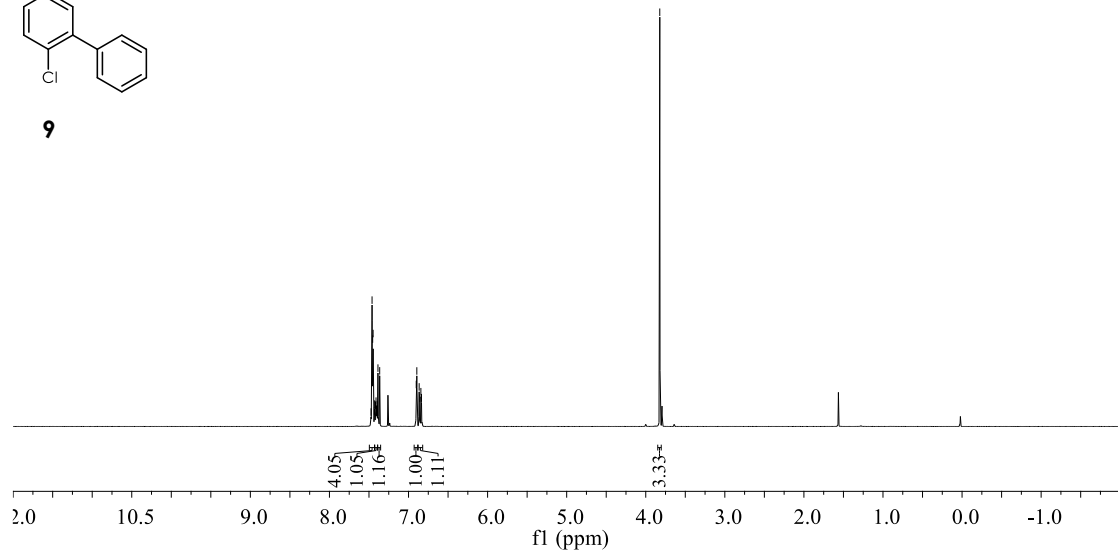

<sup>13</sup>C NMR (CDCl<sub>3</sub>)

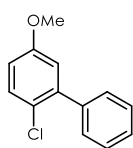

**9**

158.18  
141.27  
139.45  
128.02  
123.87  
116.53  
114.30  
77.32  
77.00  
76.68  
55.54

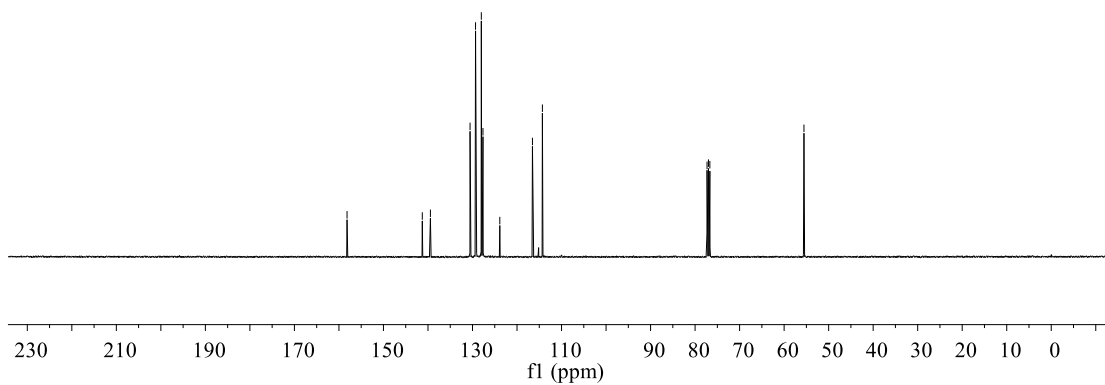

7.41  
7.40  
7.40  
7.39  
7.38  
7.38  
7.37  
7.37  
7.36  
7.11  
7.08  
7.08  
7.06  
6.97  
6.97  
6.96  
6.95  
6.86  
6.85  
6.84  
6.84  
6.83  
6.82  
3.83

<sup>1</sup>H NMR (CDCl<sub>3</sub>)

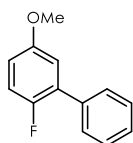

**9-F**

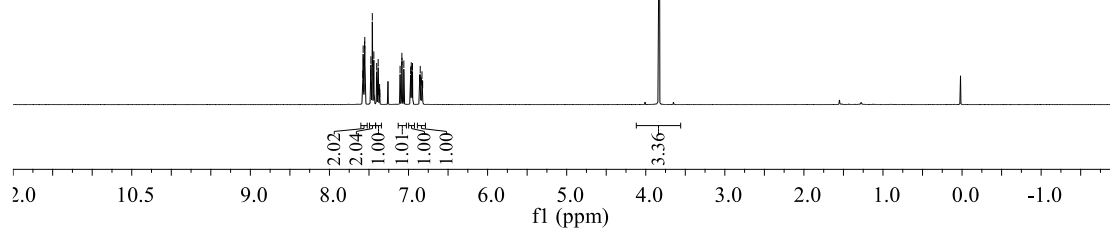

$^{13}\text{C}$  NMR( $\text{CDCl}_3$ )

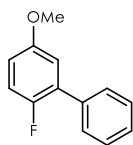

**9-F**

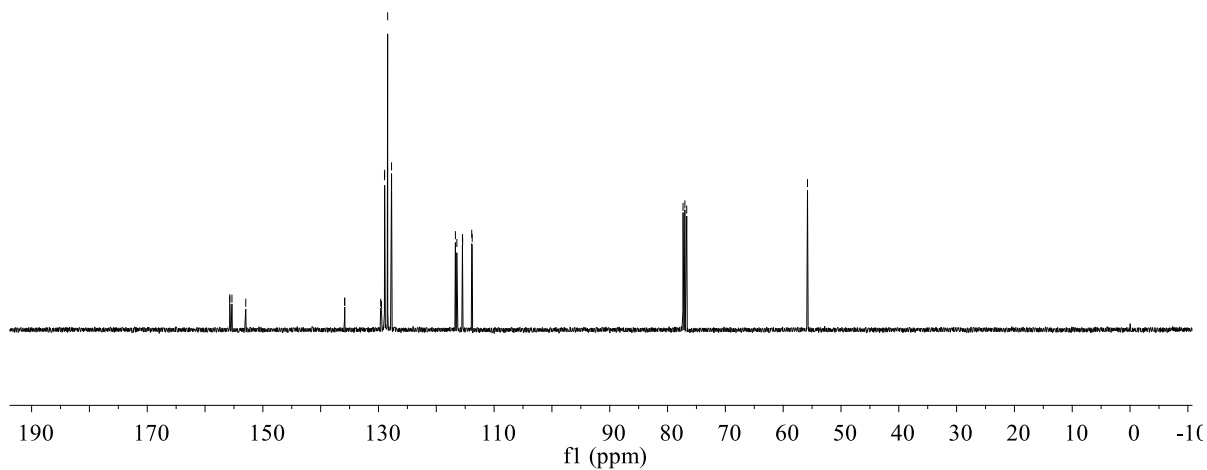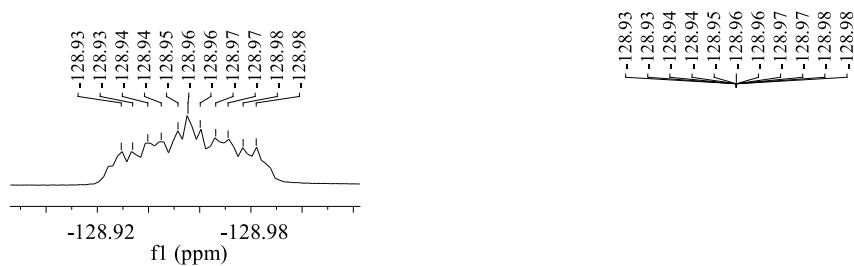

$^{19}\text{F}$  NMR( $\text{CDCl}_3$ )

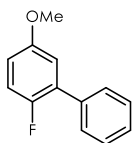

**9-F**

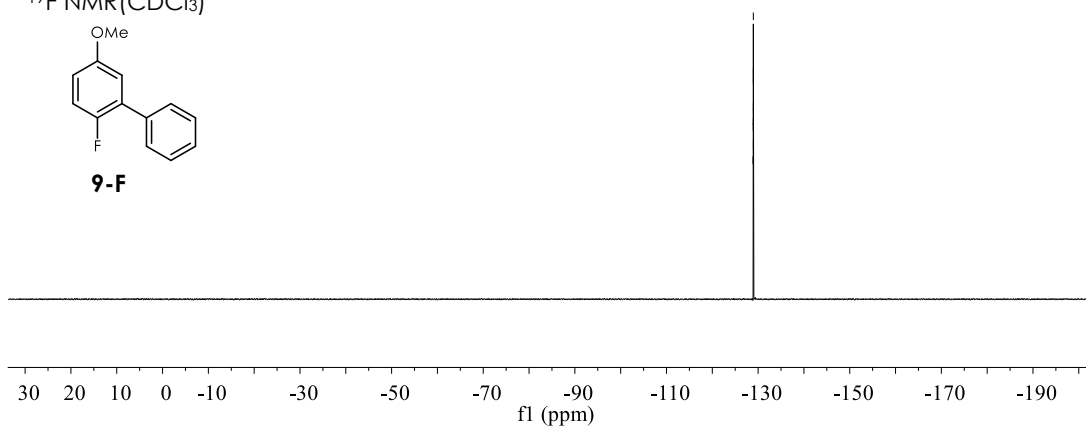

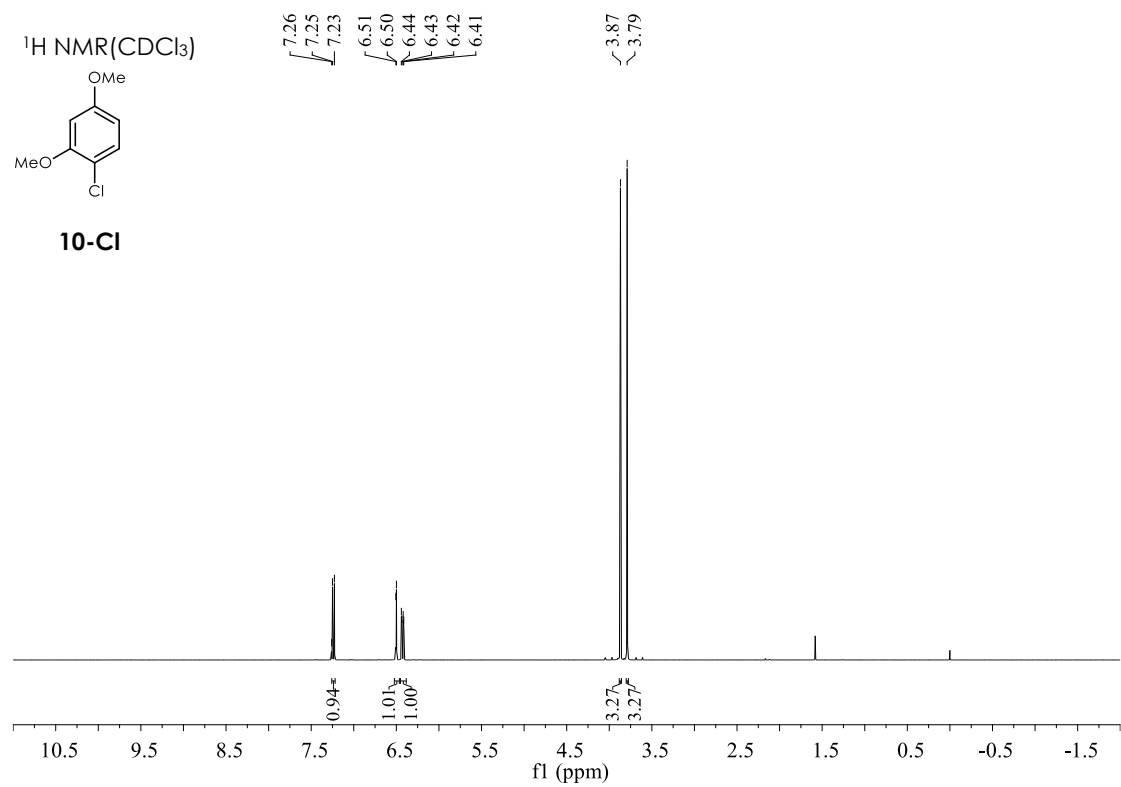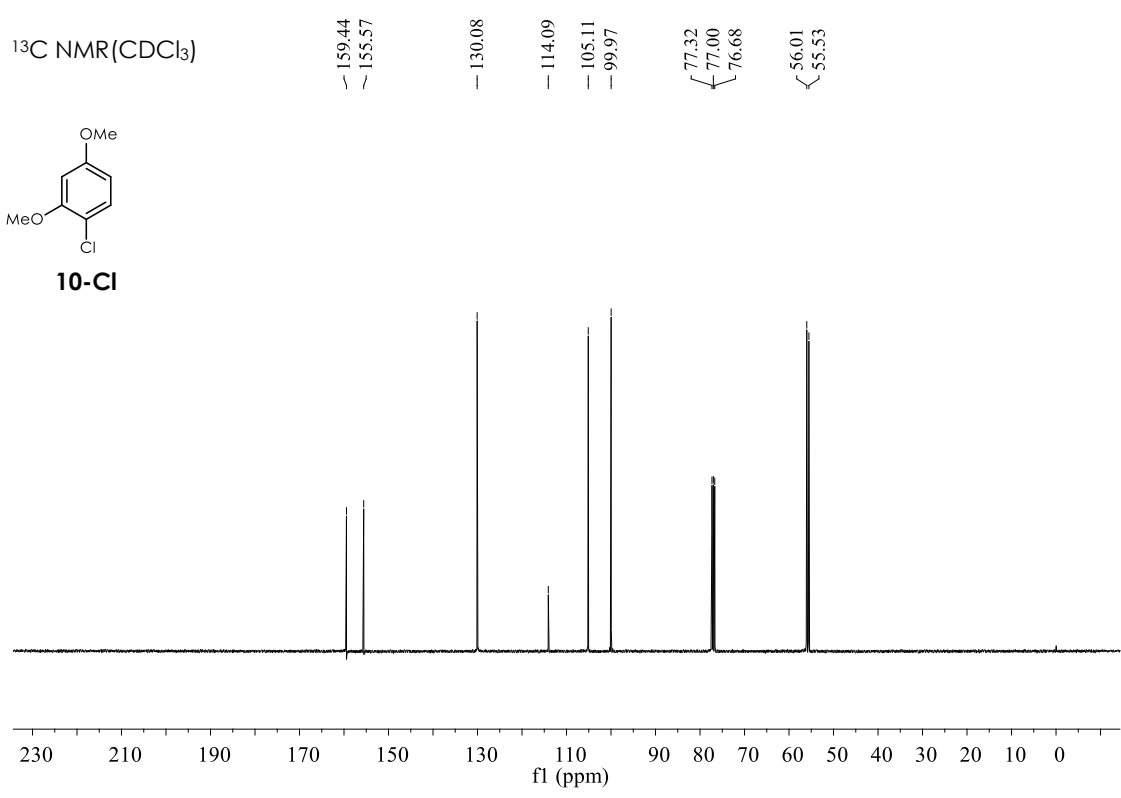



<sup>1</sup>H NMR(CDCl<sub>3</sub>)

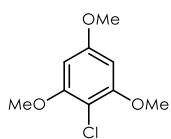

**11**

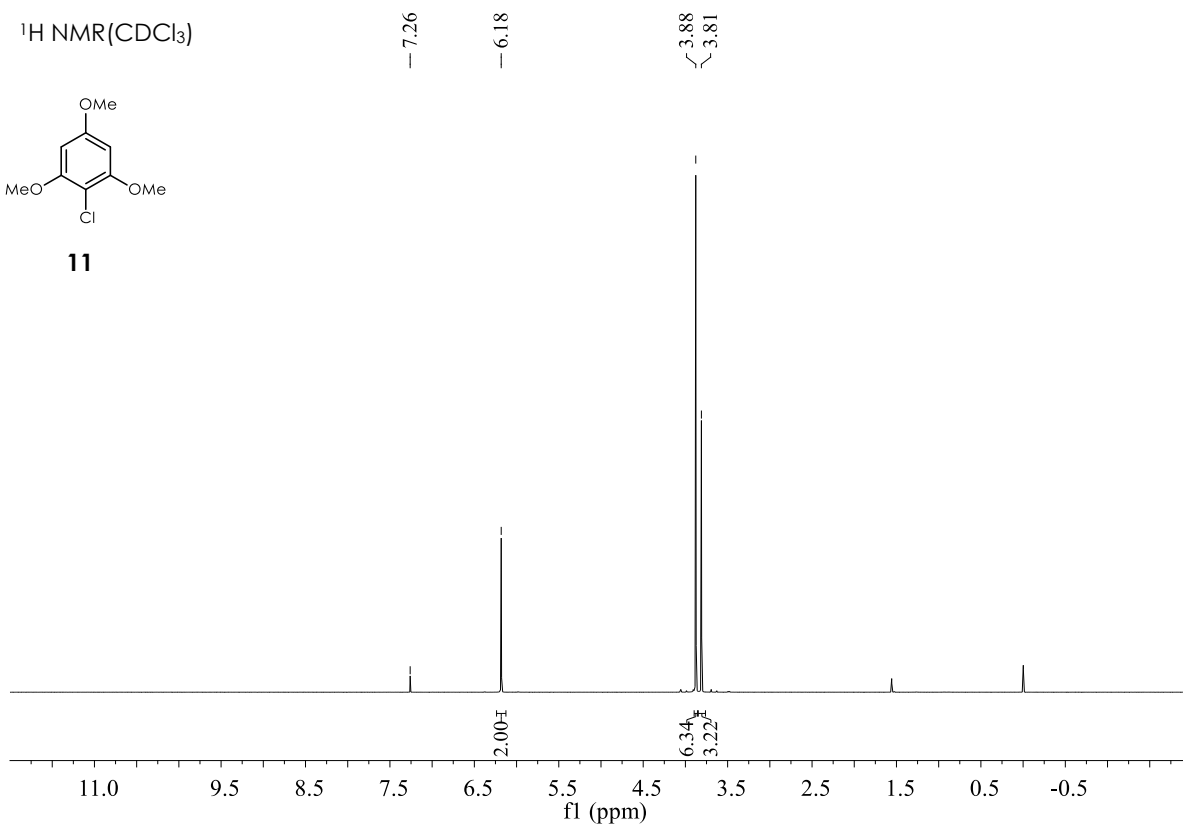

<sup>13</sup>C NMR(CDCl<sub>3</sub>)

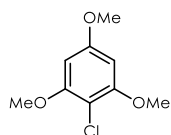

**11**

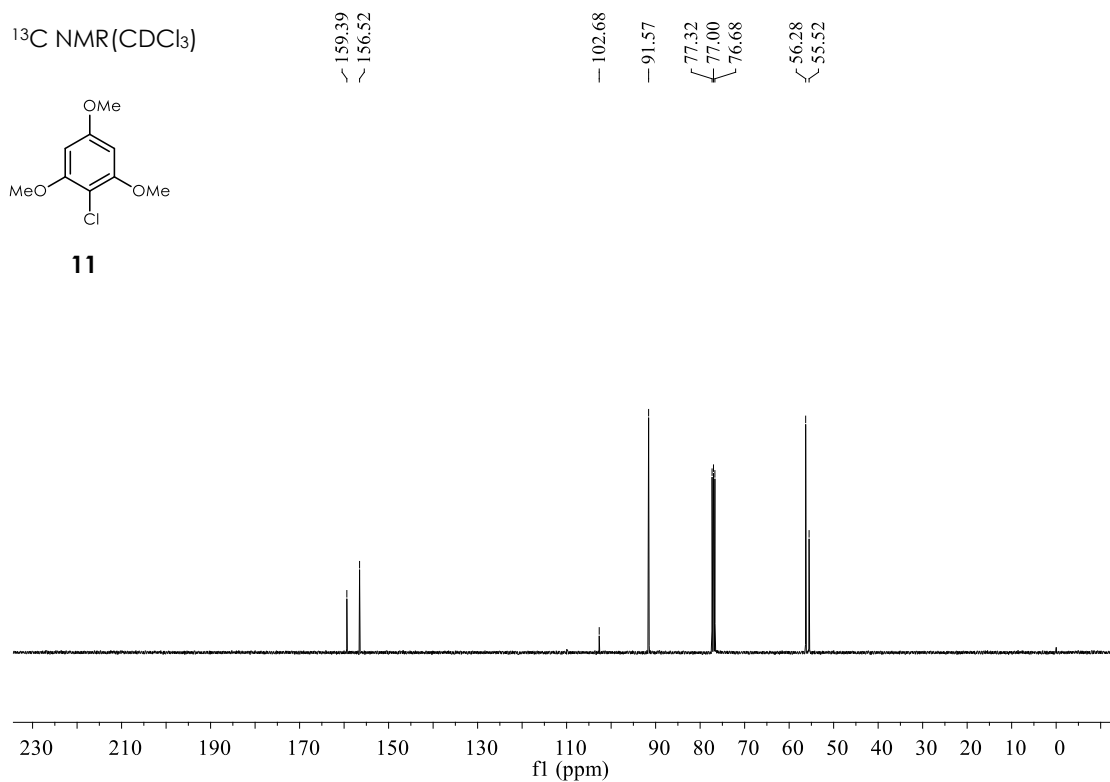

$^1\text{H NMR}(\text{CDCl}_3)$

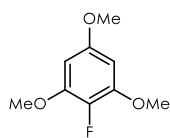

**11-F**

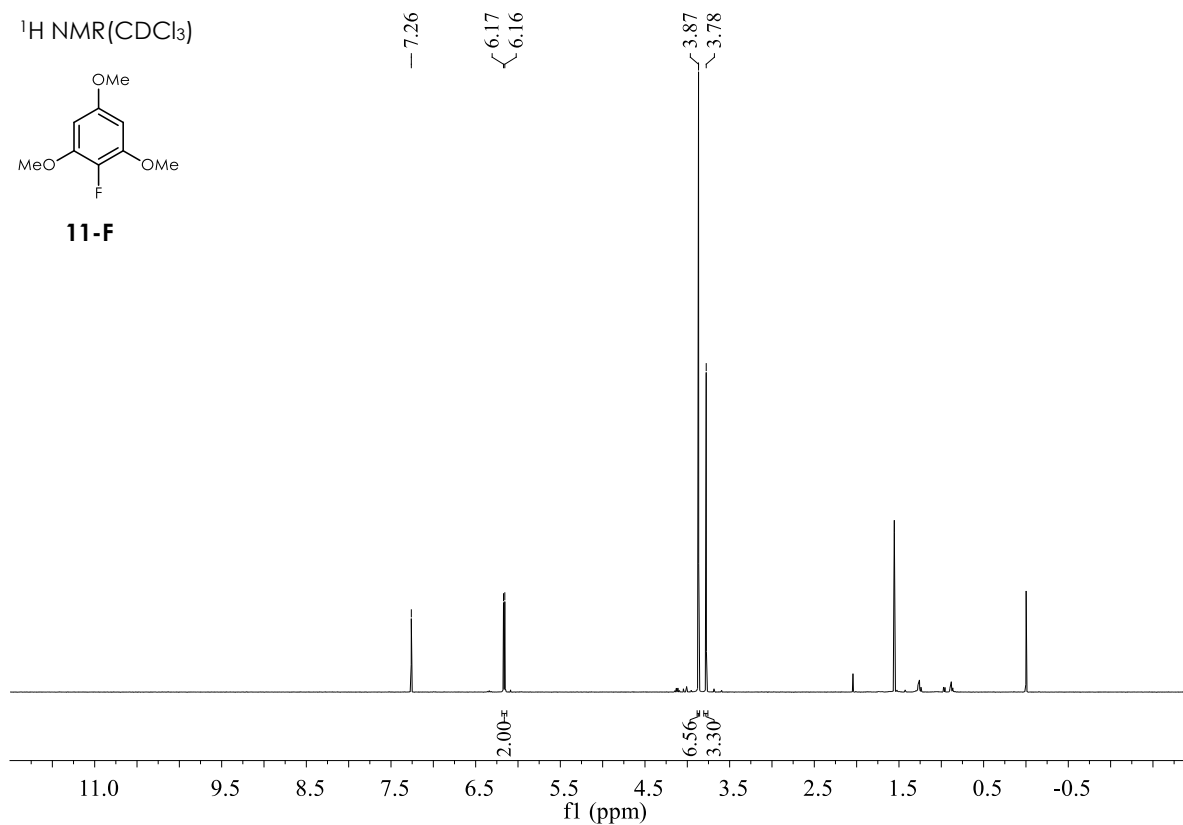

$^{13}\text{C NMR}(\text{CDCl}_3)$

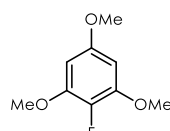

**11-F**

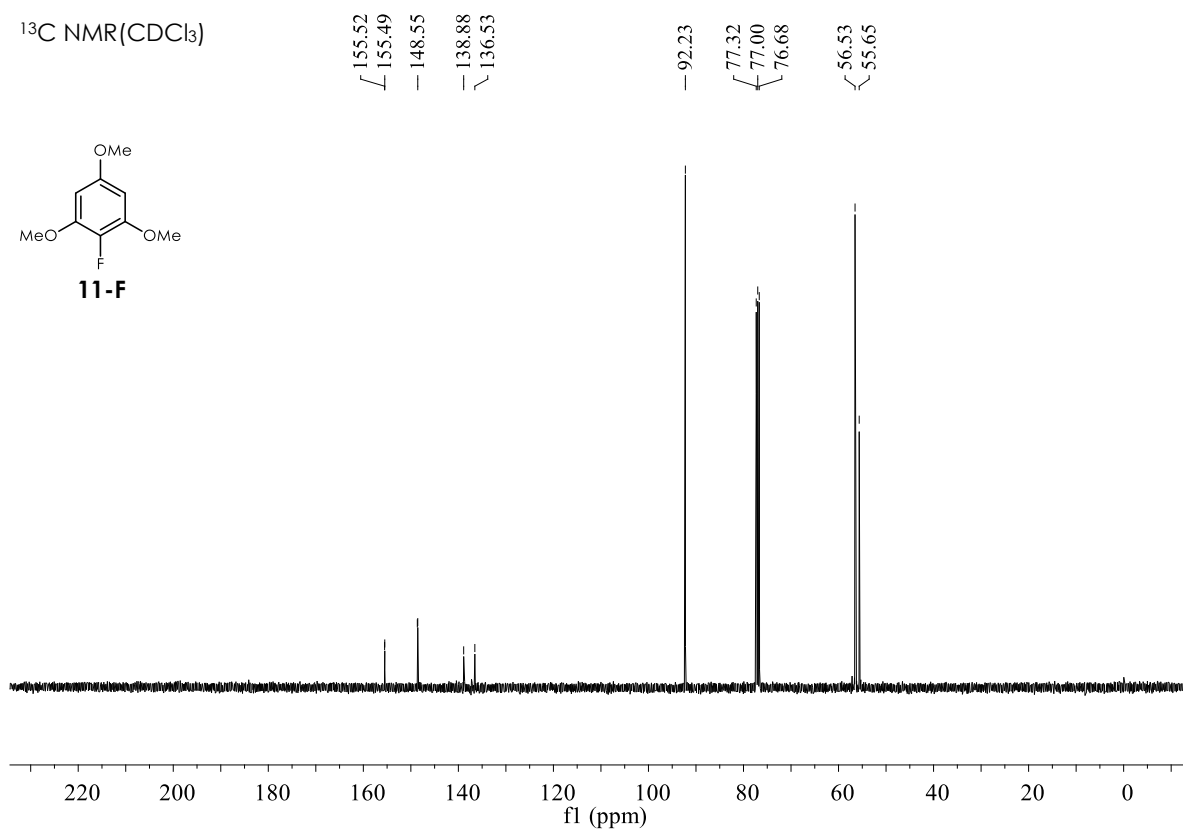

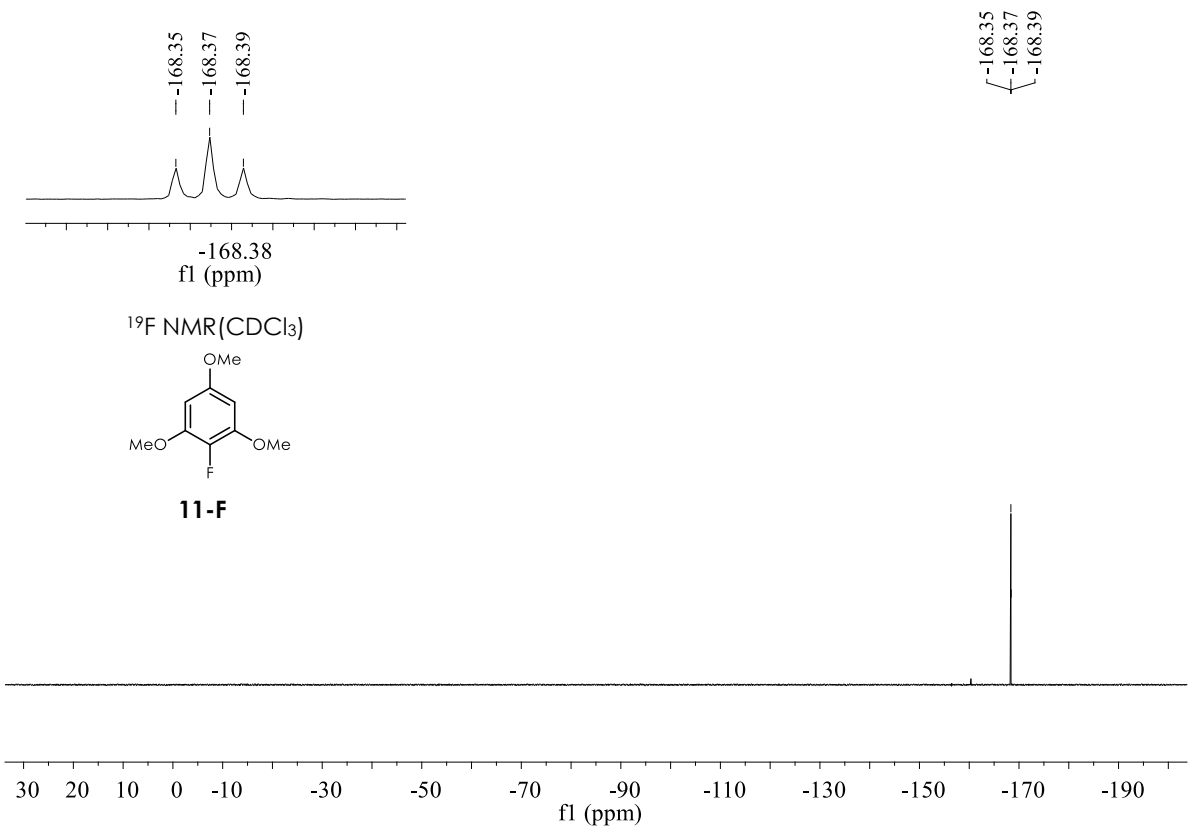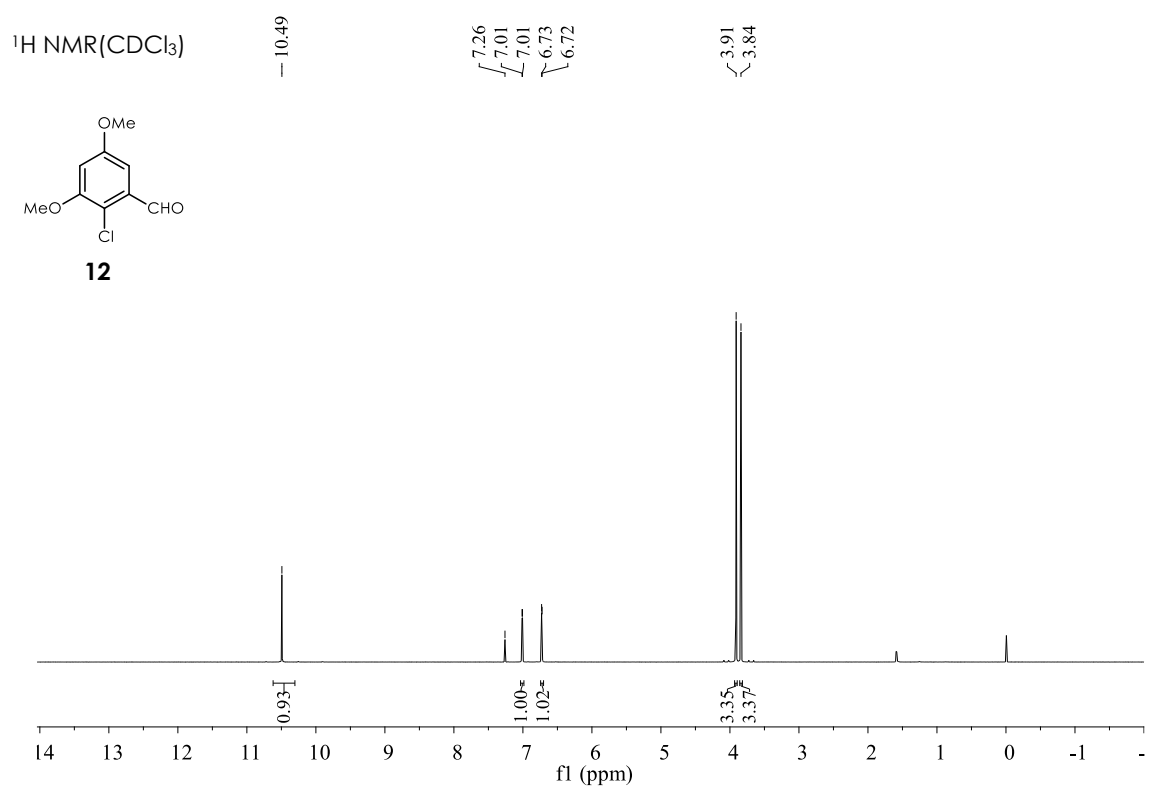

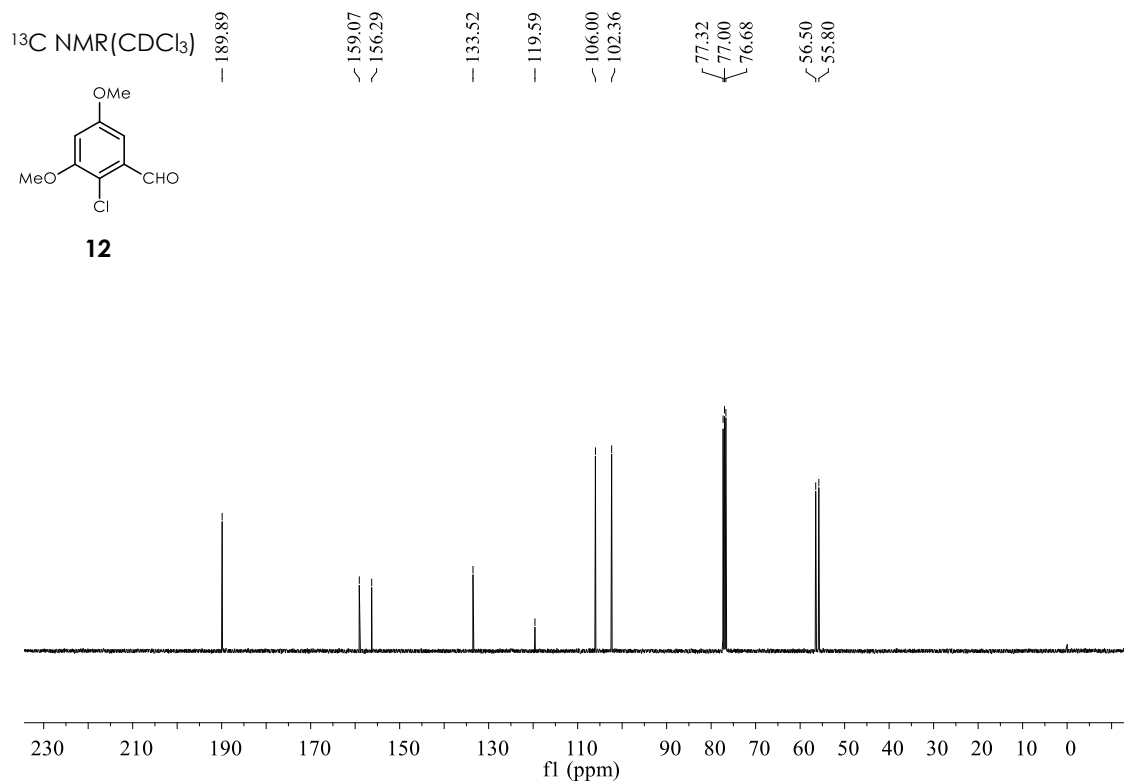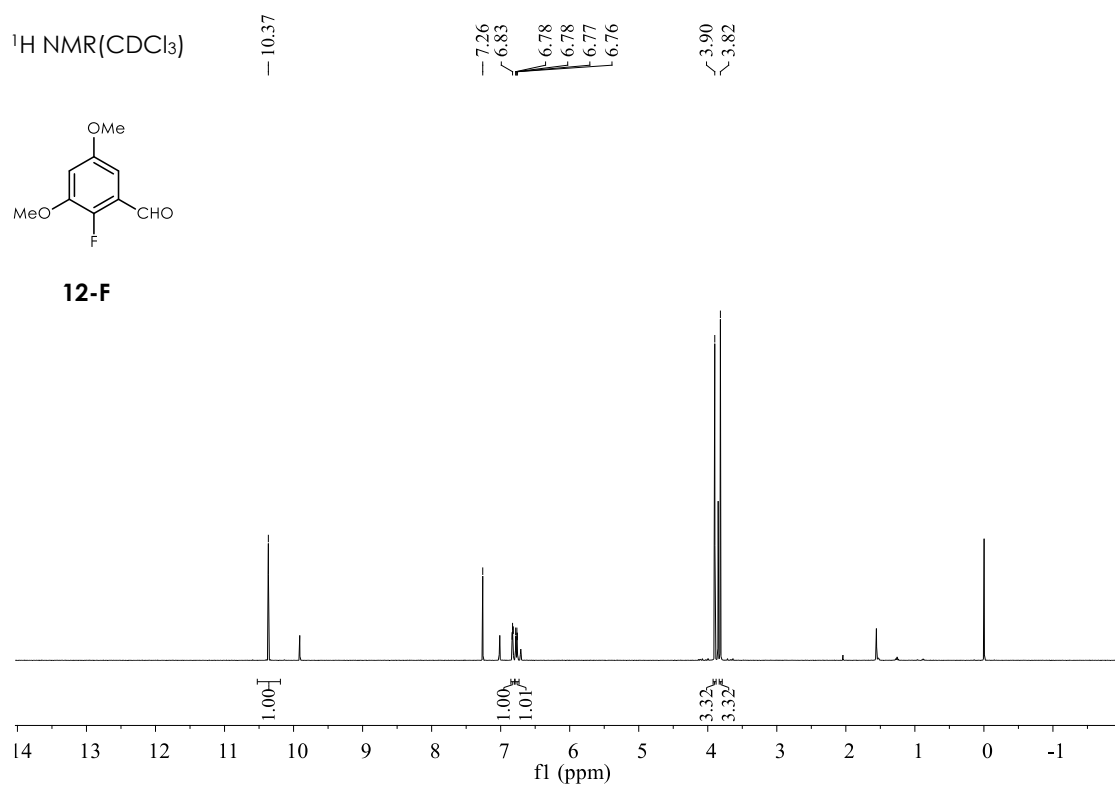

<sup>13</sup>C NMR (CDCl<sub>3</sub>)

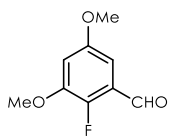

12-F

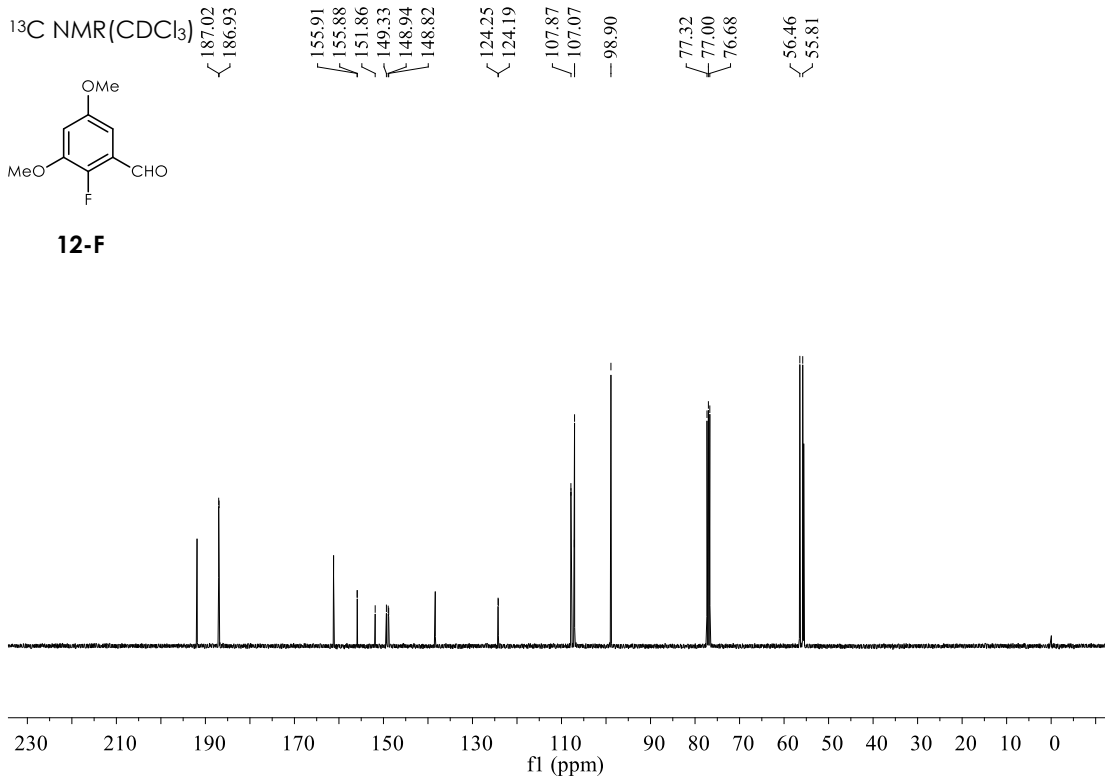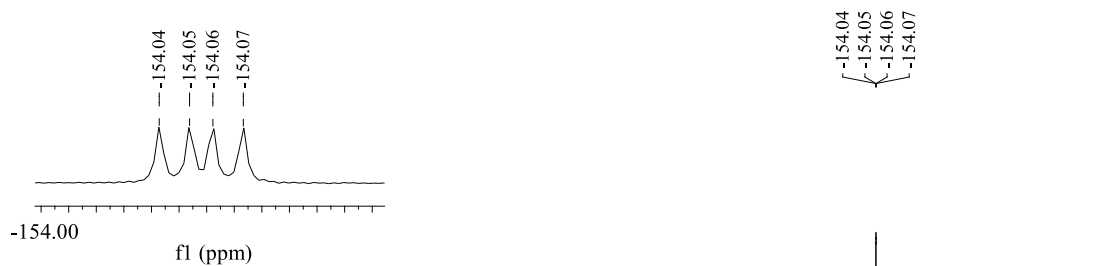

<sup>19</sup>F NMR (CDCl<sub>3</sub>)

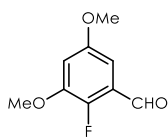

12-F

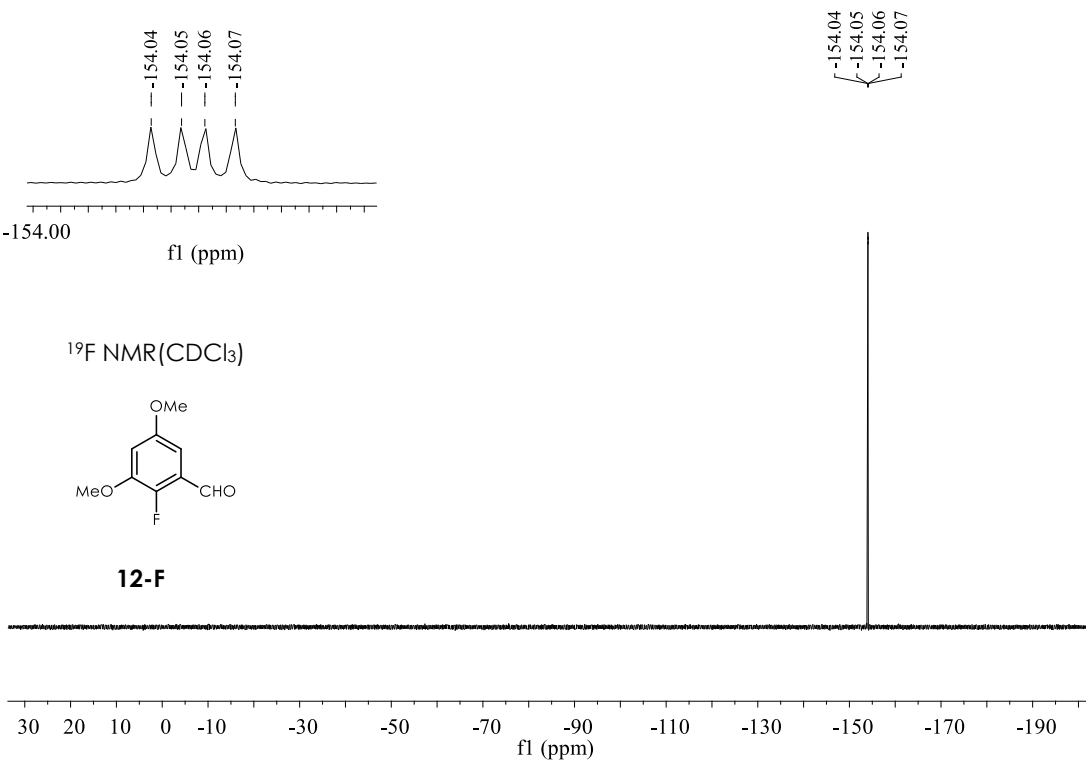

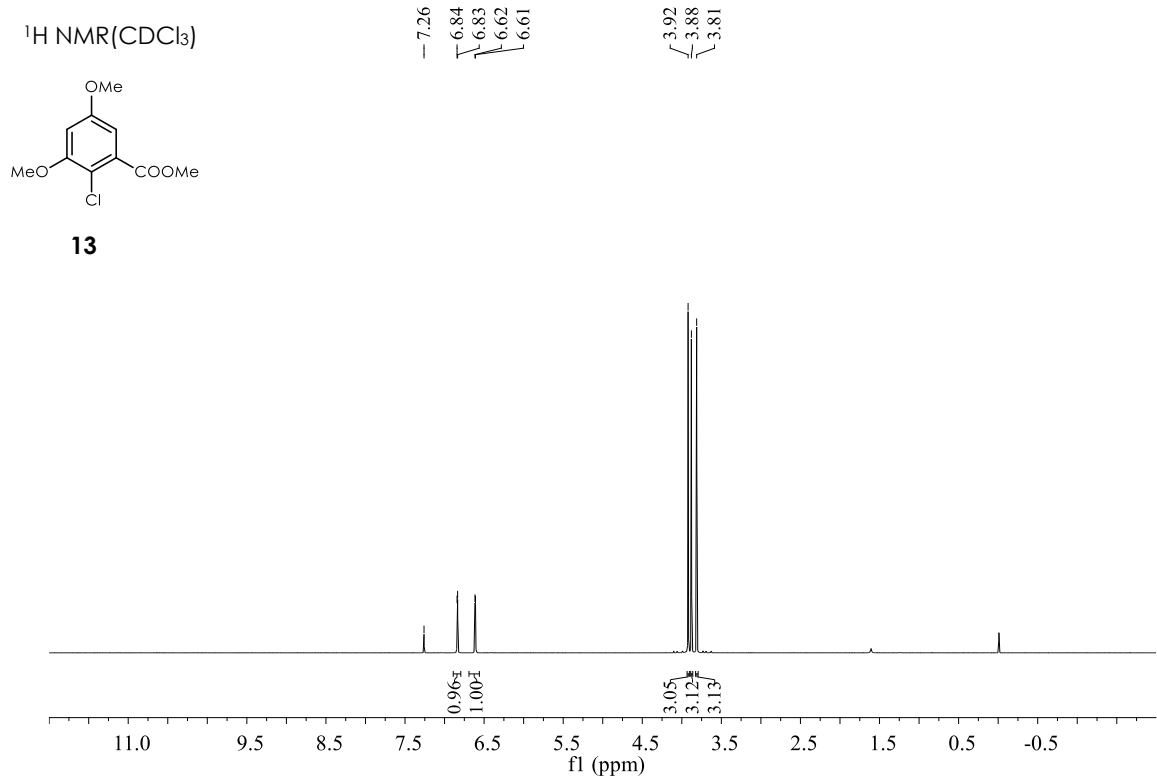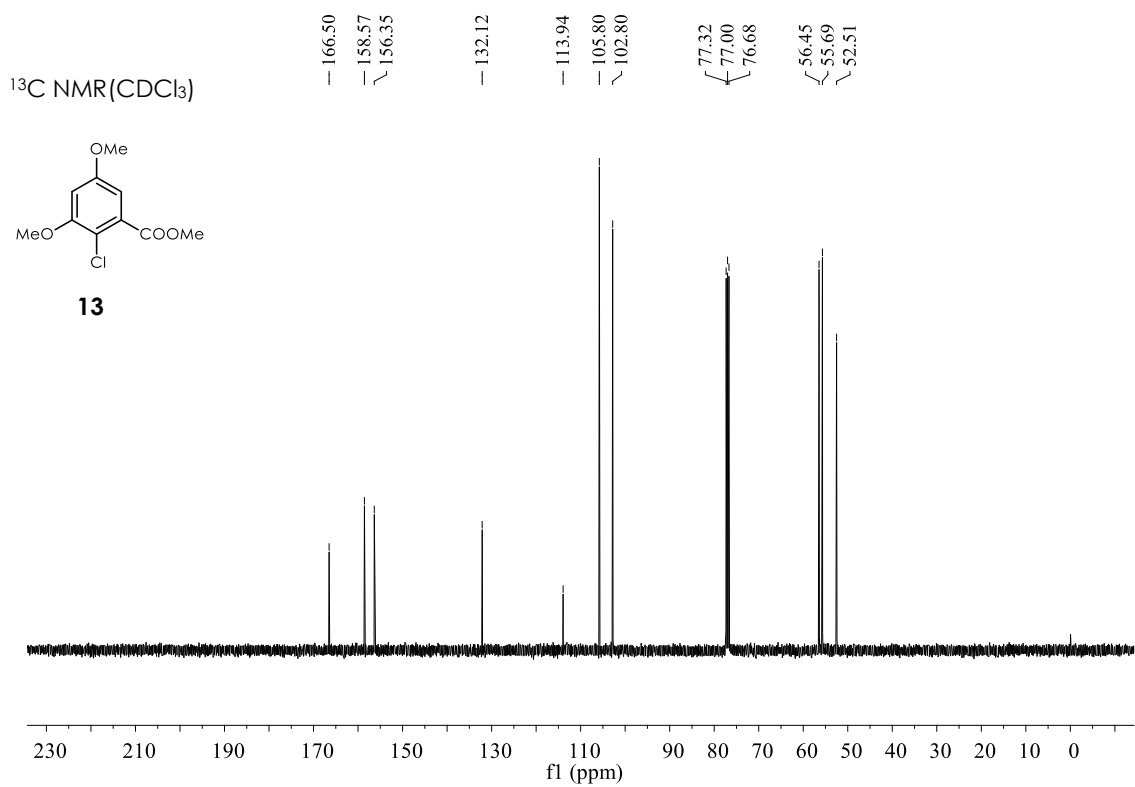

$^1\text{H NMR}(\text{CDCl}_3)$

7.96  
6.89  
6.71  
6.70  
6.69  
6.68  
3.93  
3.87  
3.81

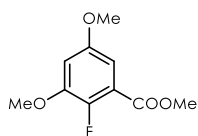

**13-F**

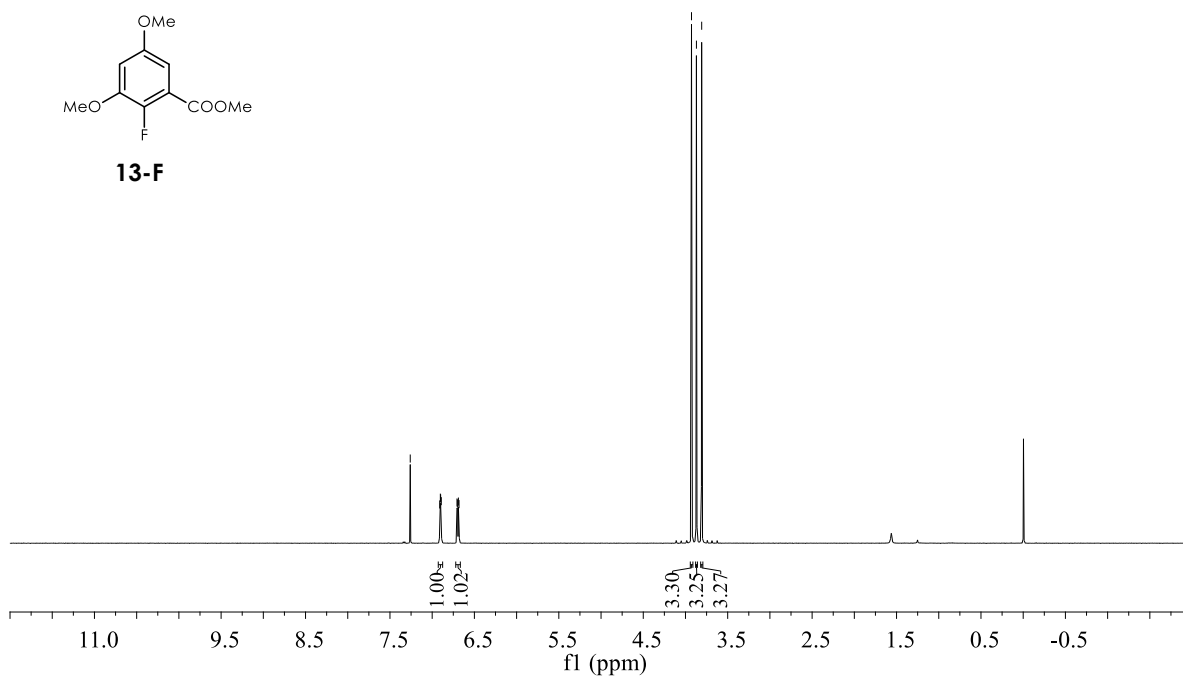

$^{13}\text{C NMR}(\text{CDCl}_3)$

165.01  
164.98  
155.00  
149.05  
148.35  
145.82  
118.80  
118.71  
105.74  
105.73  
104.05  
77.52  
77.00  
76.68  
56.47  
55.75  
52.39

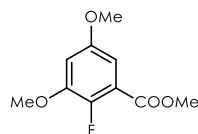

**13-F**

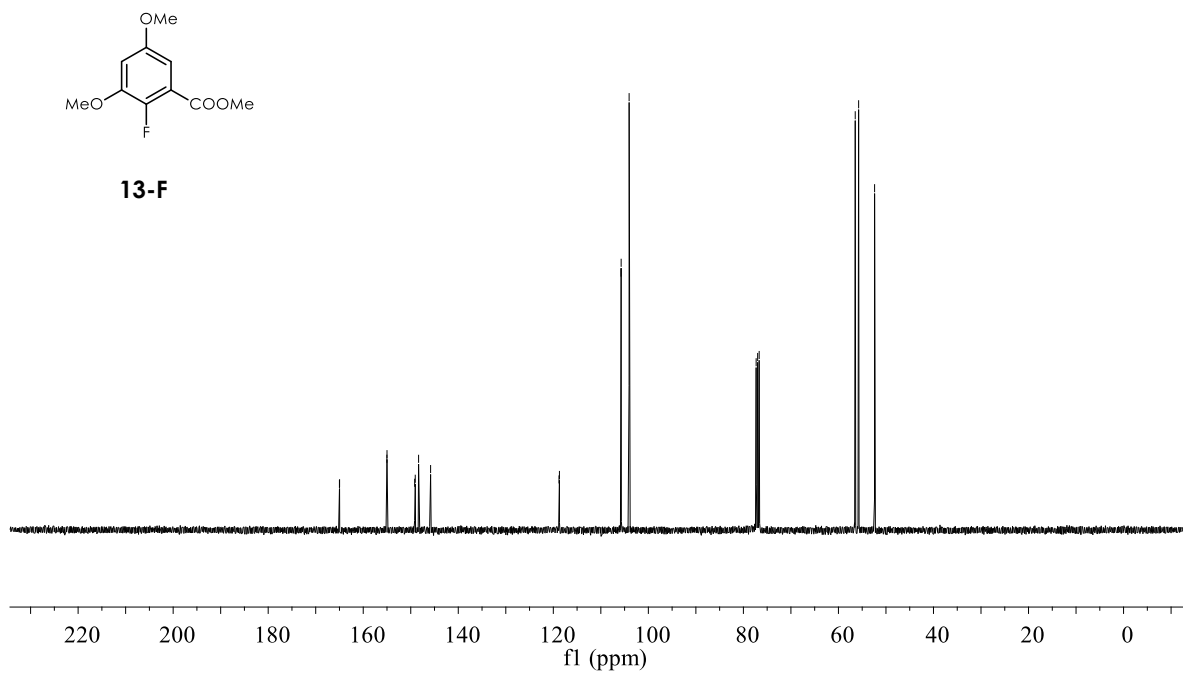

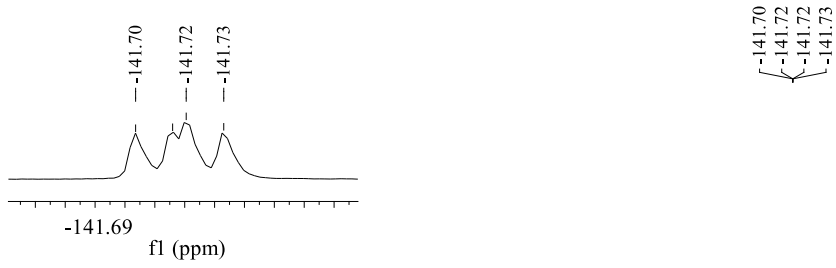

<sup>19</sup>F NMR(CDCl<sub>3</sub>)

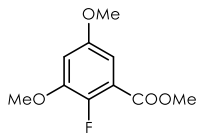

**13-F**

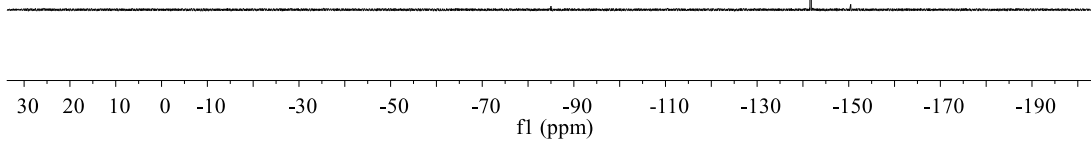

<sup>1</sup>H NMR(CDCl<sub>3</sub>)

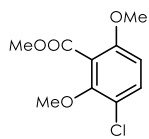

**14**

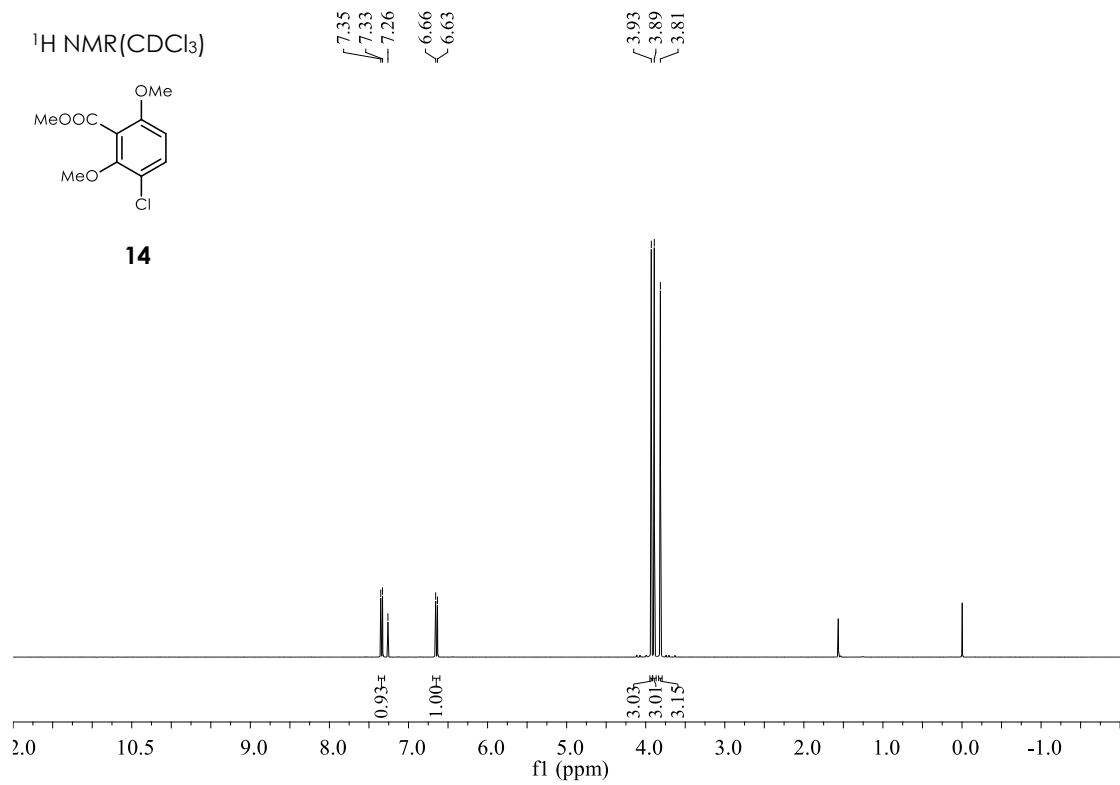



$^{13}\text{C}$  NMR( $\text{CDCl}_3$ )

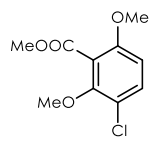

**14**

— 165.81  
~ 155.84  
~ 153.62  
— 131.51  
~ 119.84  
~ 119.48  
— 107.73  
— 77.32  
— 77.00  
— 76.68  
— 61.97  
— 56.26  
~ 52.62

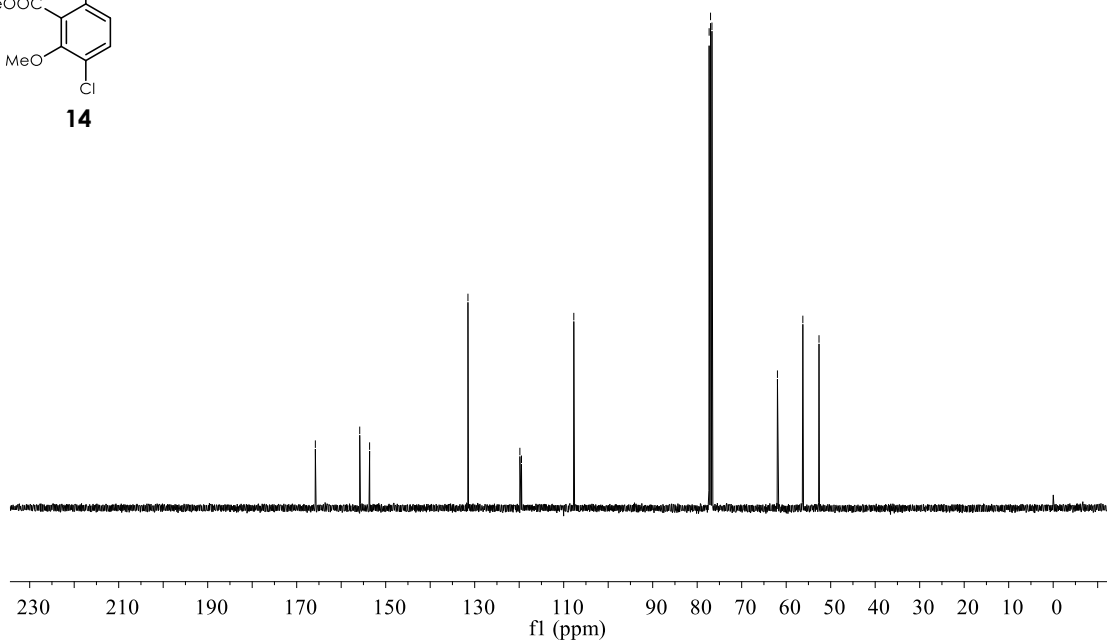

$^1\text{H}$  NMR( $\text{CDCl}_3$ )

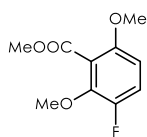

**14-F**

7.26  
7.08  
7.06  
7.03  
6.56  
6.55  
6.53  
6.53  
3.95  
3.94  
3.92  
3.79

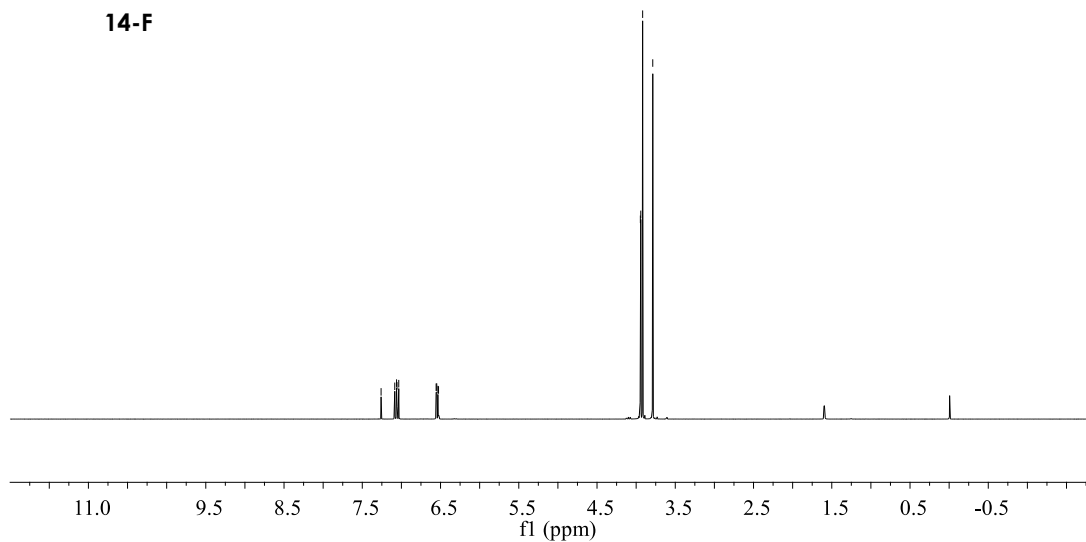

<sup>13</sup>C NMR (CDCl<sub>3</sub>)

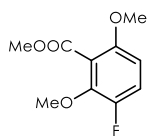

**14-F**

165.66  
165.62  
152.66  
152.64  
150.70  
148.30  
145.21  
145.08  
118.57  
117.81  
117.60  
105.81  
105.74  
77.32  
77.00  
76.68  
61.83  
61.77  
56.34  
52.58

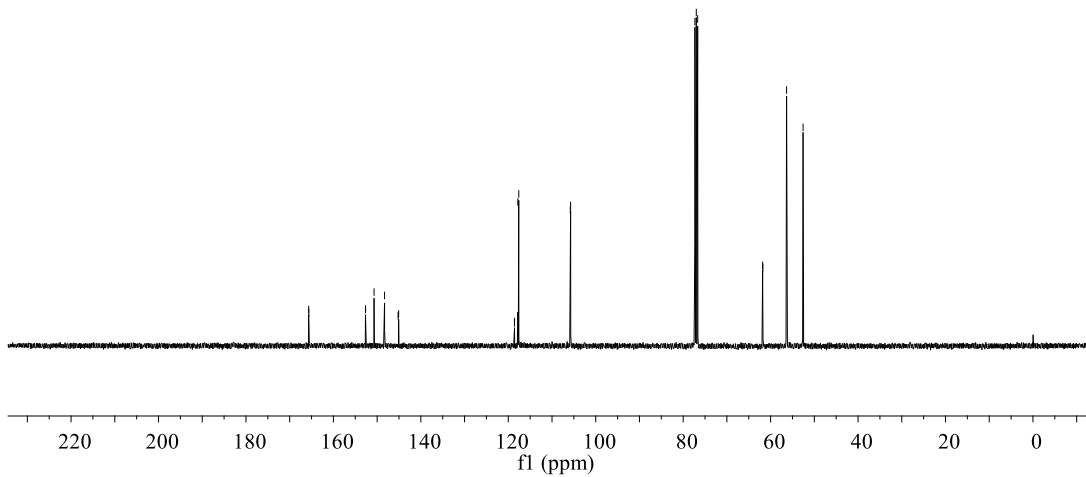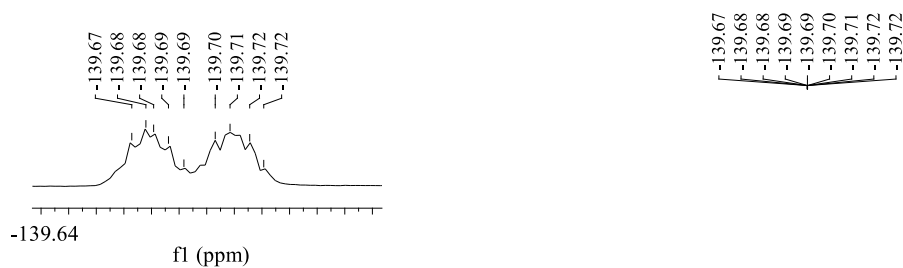

<sup>19</sup>F NMR (CDCl<sub>3</sub>)

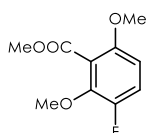

**14-F**

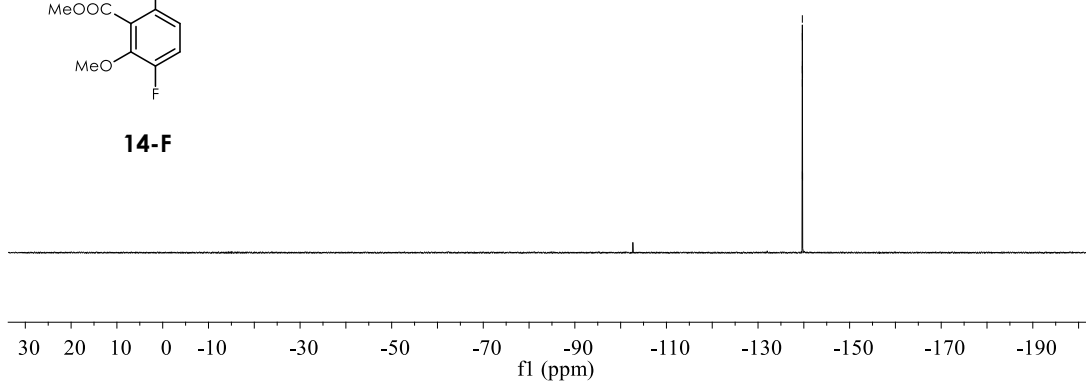

$^1\text{H NMR}(\text{CDCl}_3)$

7.34  
7.26  
6.52  
3.90

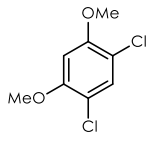

**15**

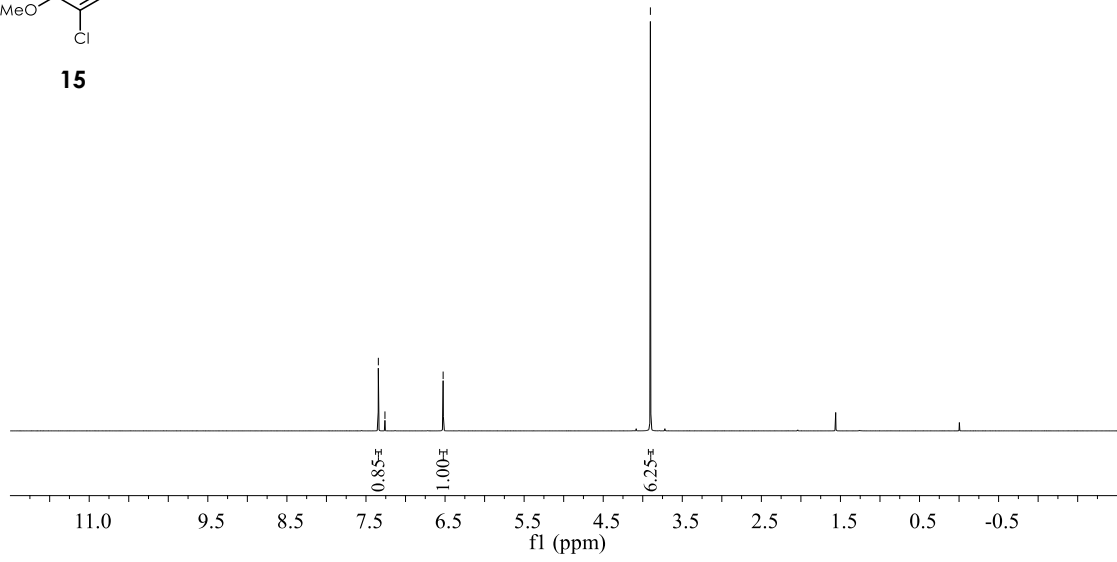

$^{13}\text{C NMR}(\text{CDCl}_3)$

154.50  
130.47  
113.99  
97.72  
77.32  
77.00  
76.68  
56.49

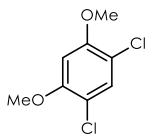

**15**

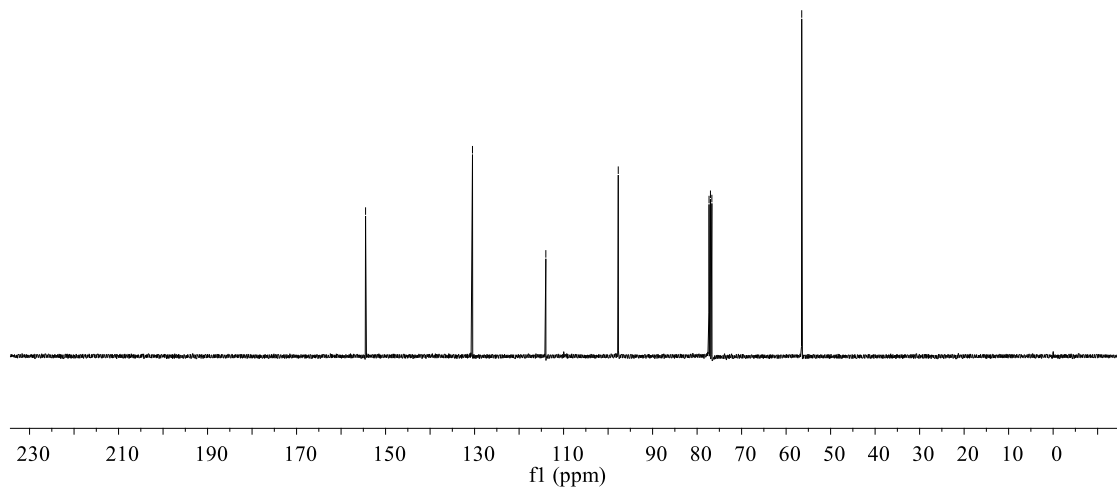

<sup>1</sup>H NMR(CDCl<sub>3</sub>)

7.26  
7.13  
7.11  
6.59  
6.57  
3.90  
3.88

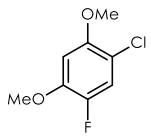

**15-F**

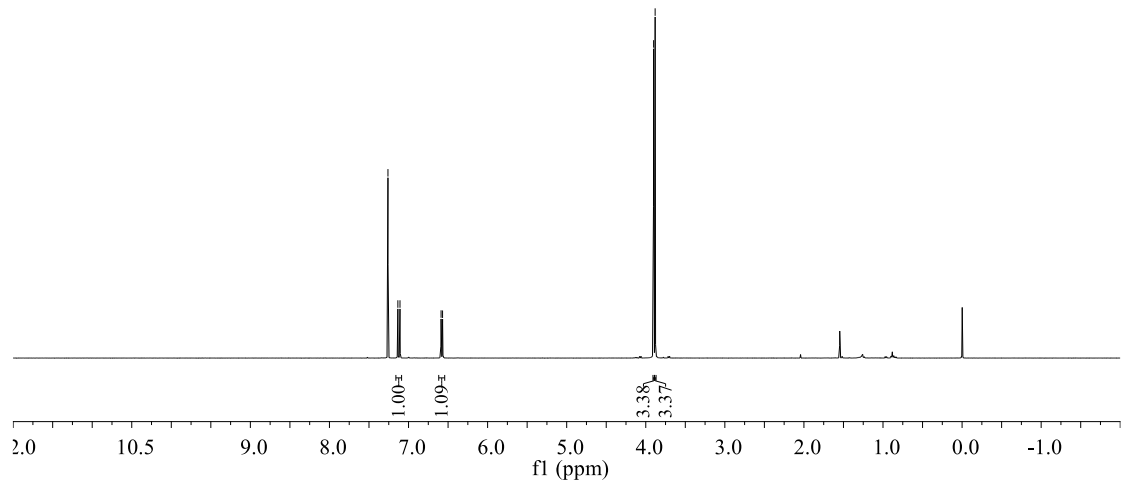

<sup>13</sup>C NMR(CDCl<sub>3</sub>)

151.55  
151.52  
147.59  
146.78  
146.66  
145.18  
117.73  
117.51  
113.11  
113.02  
99.63  
99.61  
77.32  
77.00  
76.68  
-56.88

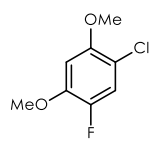

**15-F**

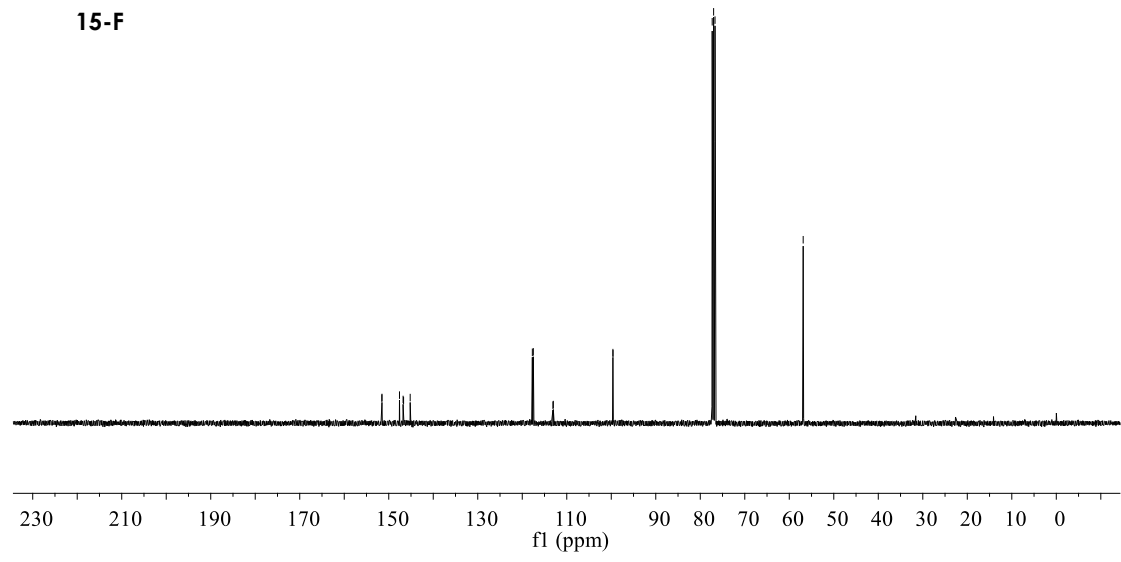

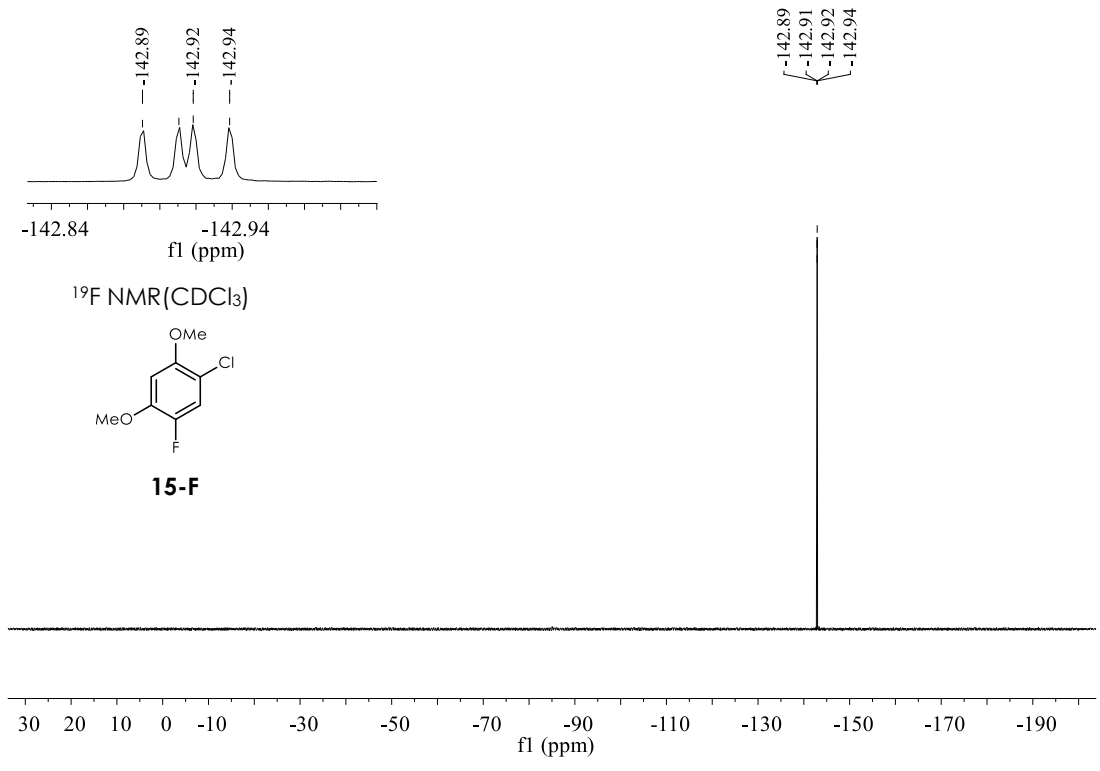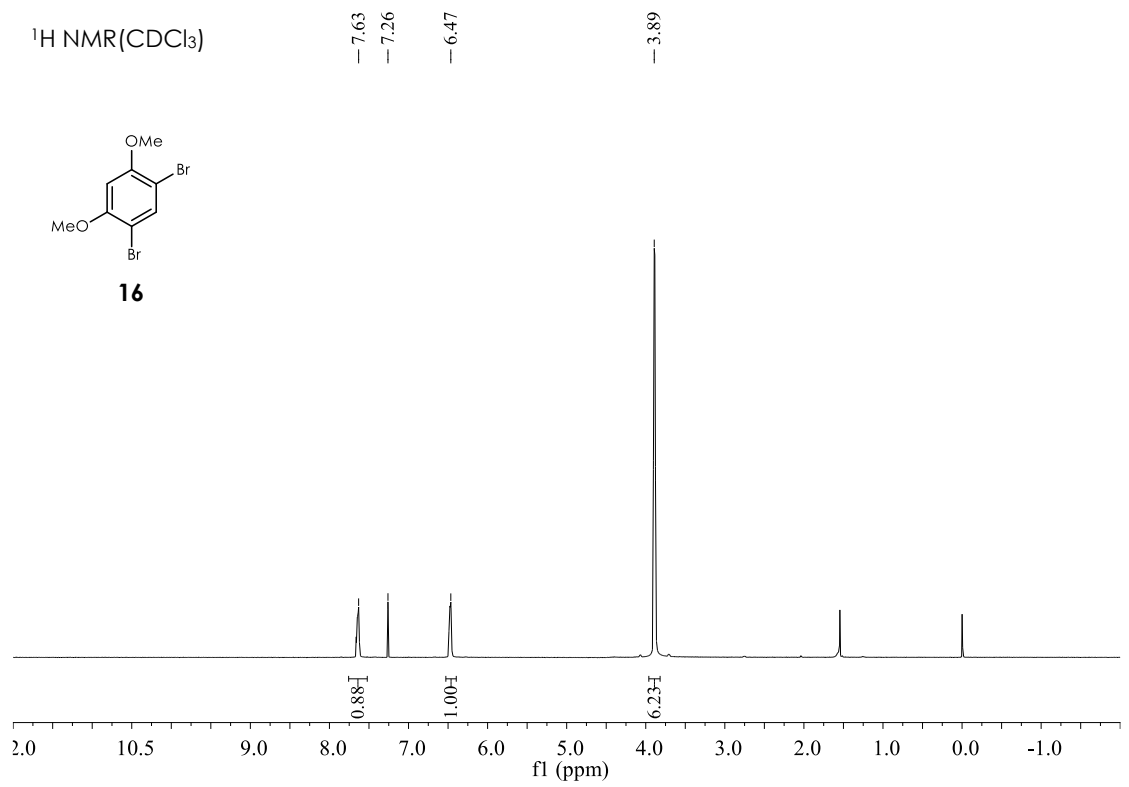

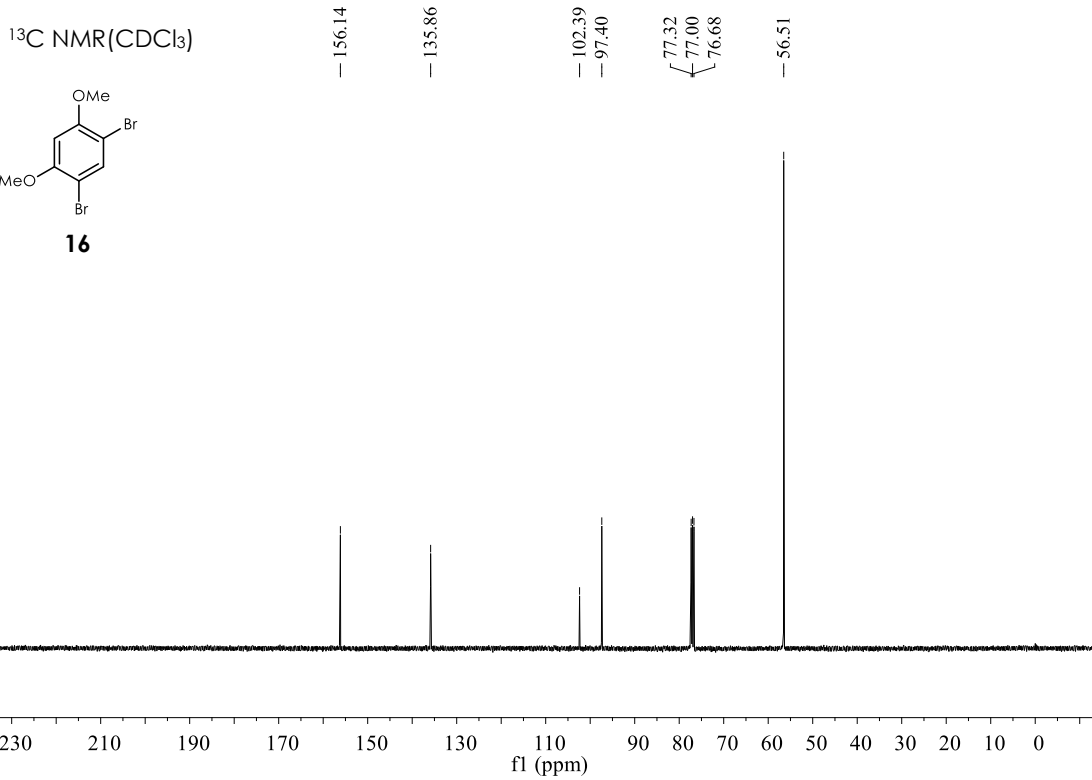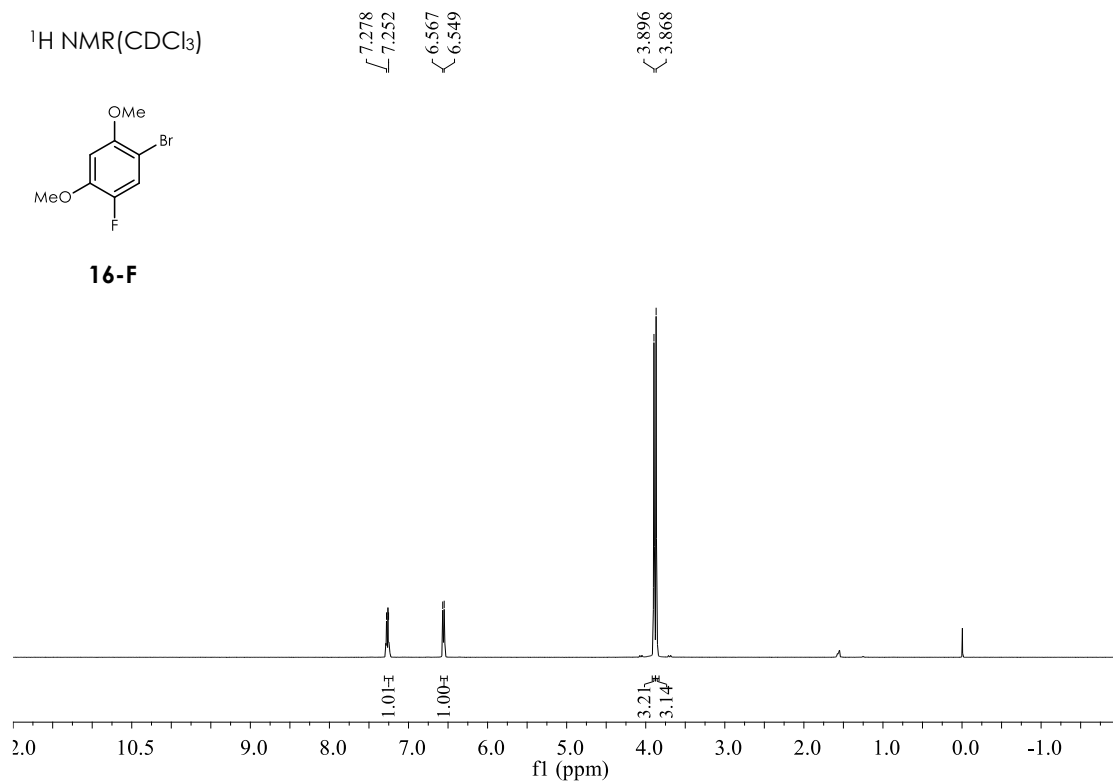

$^{13}\text{C}$  NMR( $\text{CDCl}_3$ )

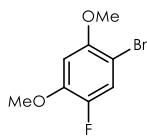

**16-F**

152.50  
152.48  
147.84  
147.40  
147.29  
145.43  
120.38  
120.16  
100.76  
100.68  
99.30  
77.32  
77.00  
76.68  
56.92  
56.75

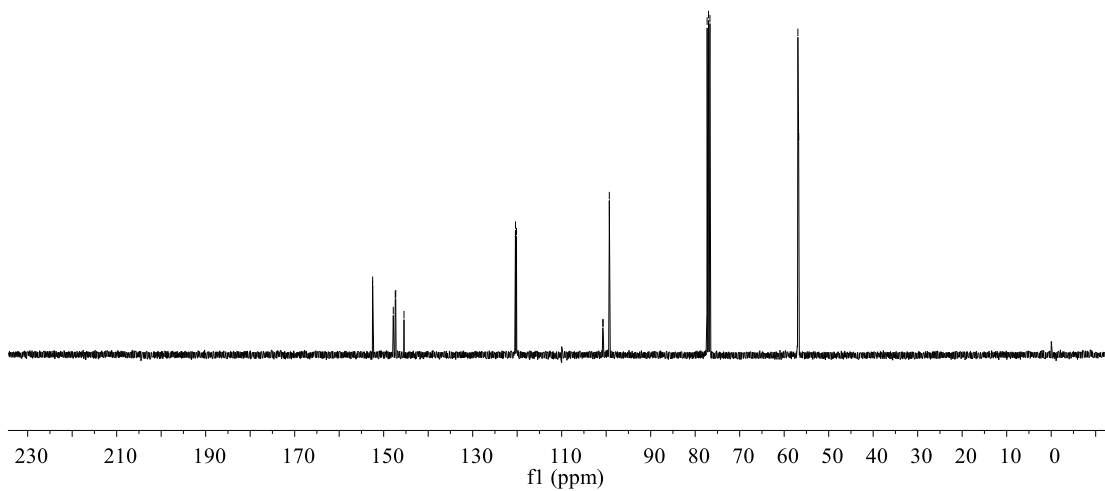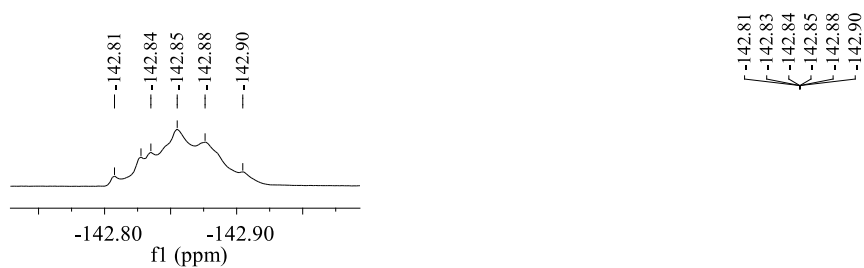

$^{19}\text{F}$  NMR( $\text{CDCl}_3$ )

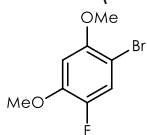

**16-F**

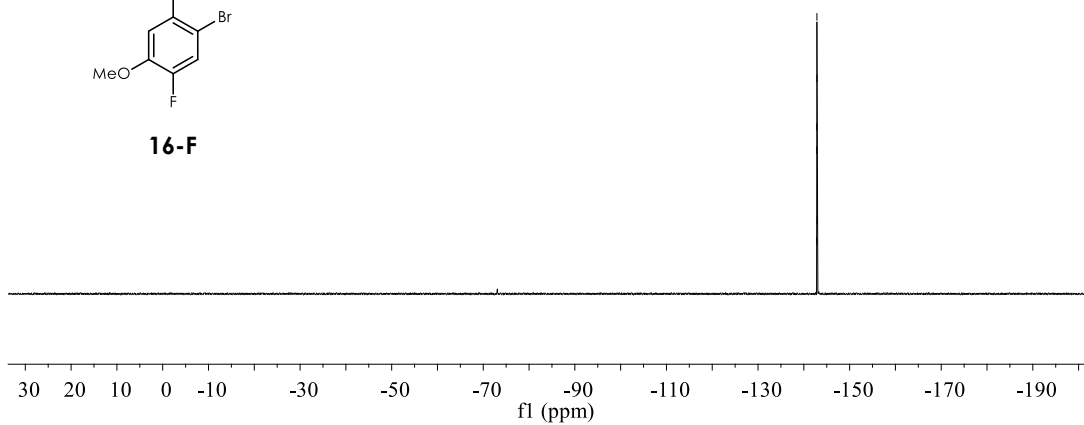

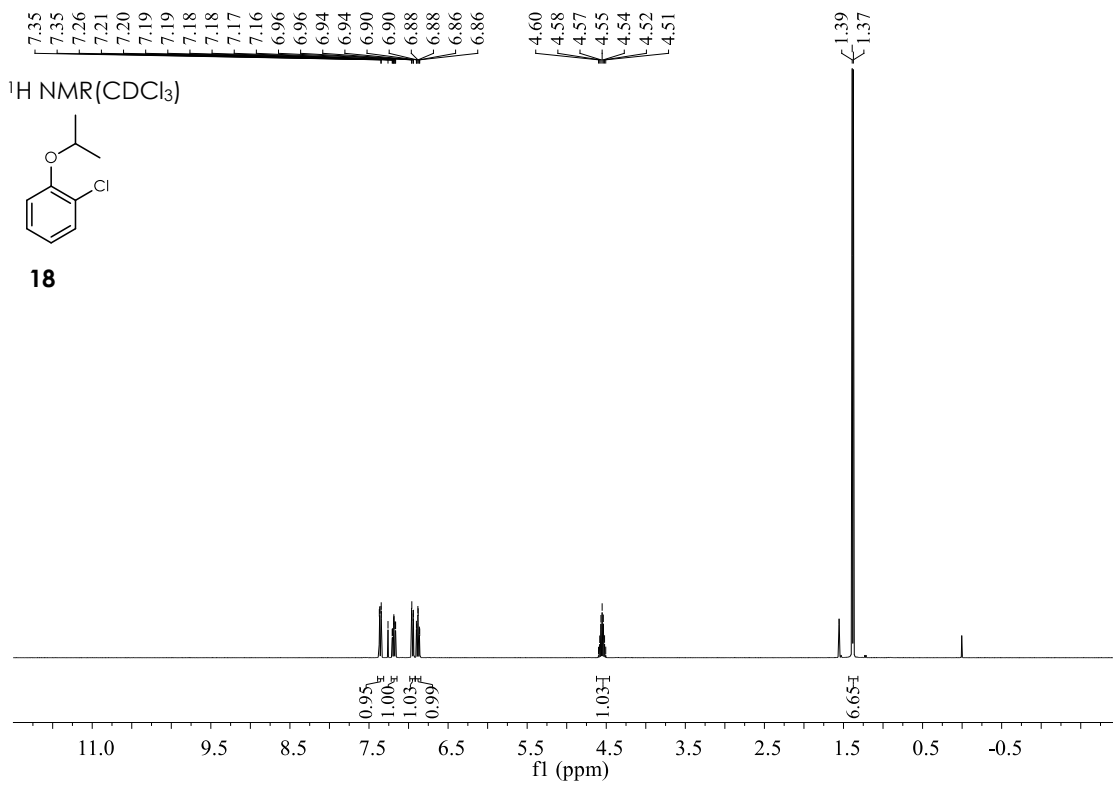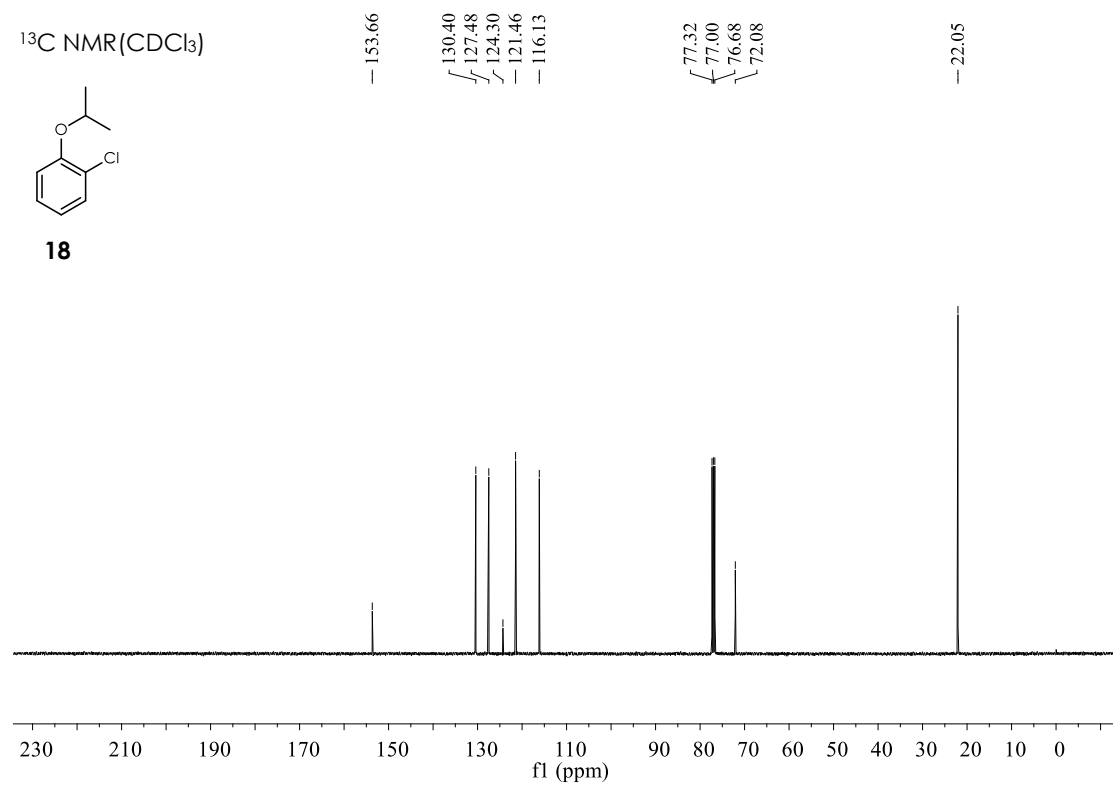



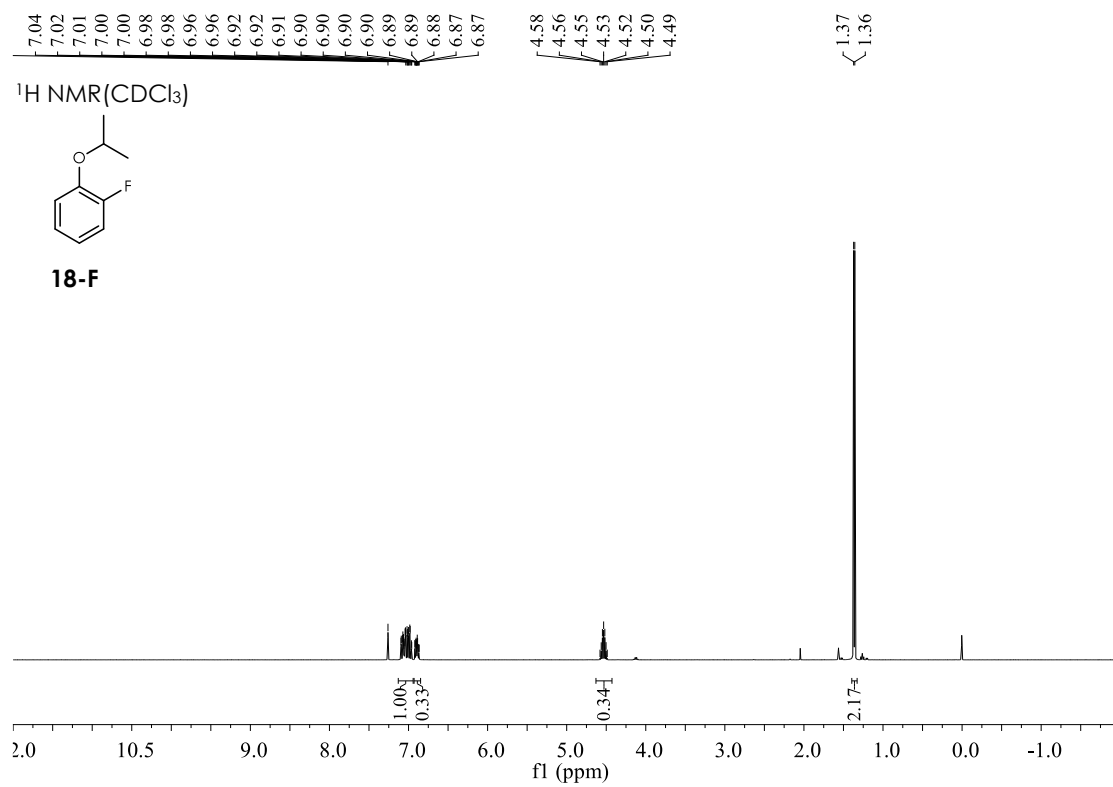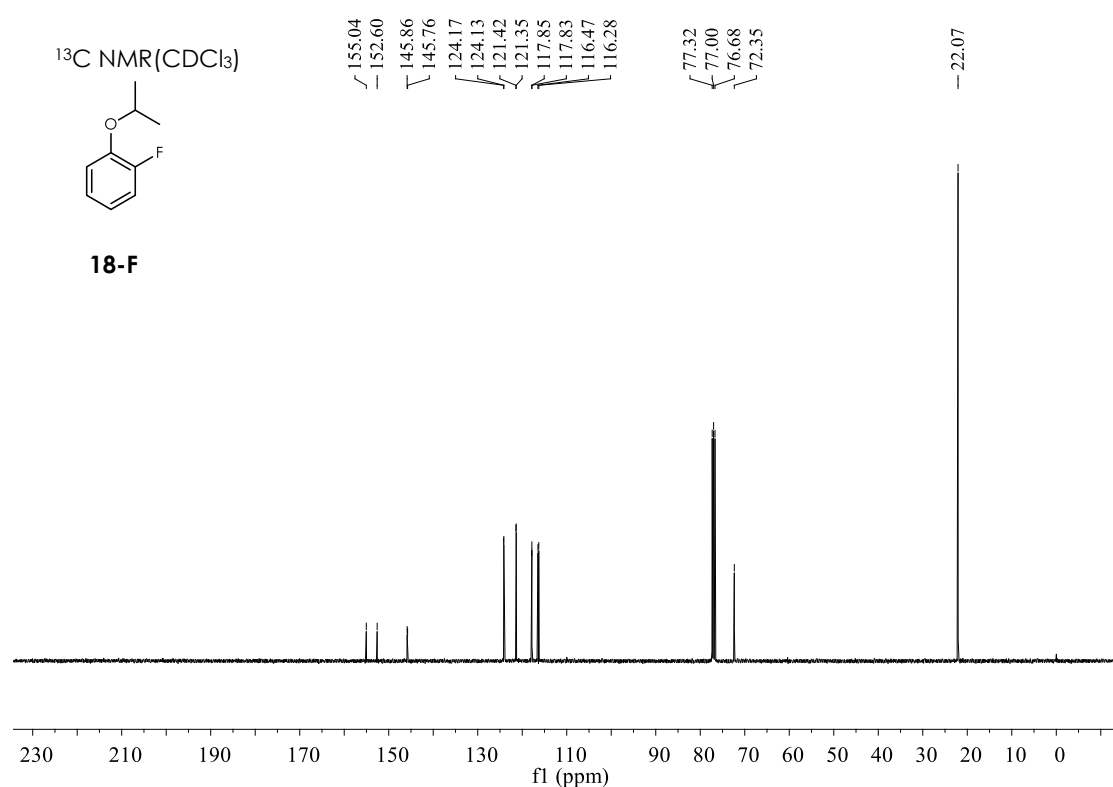

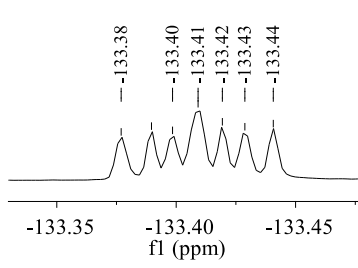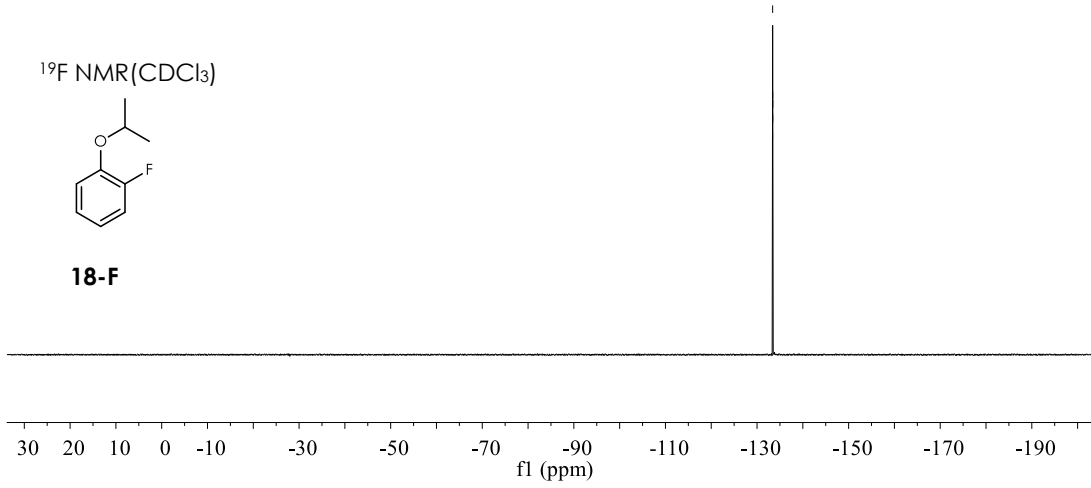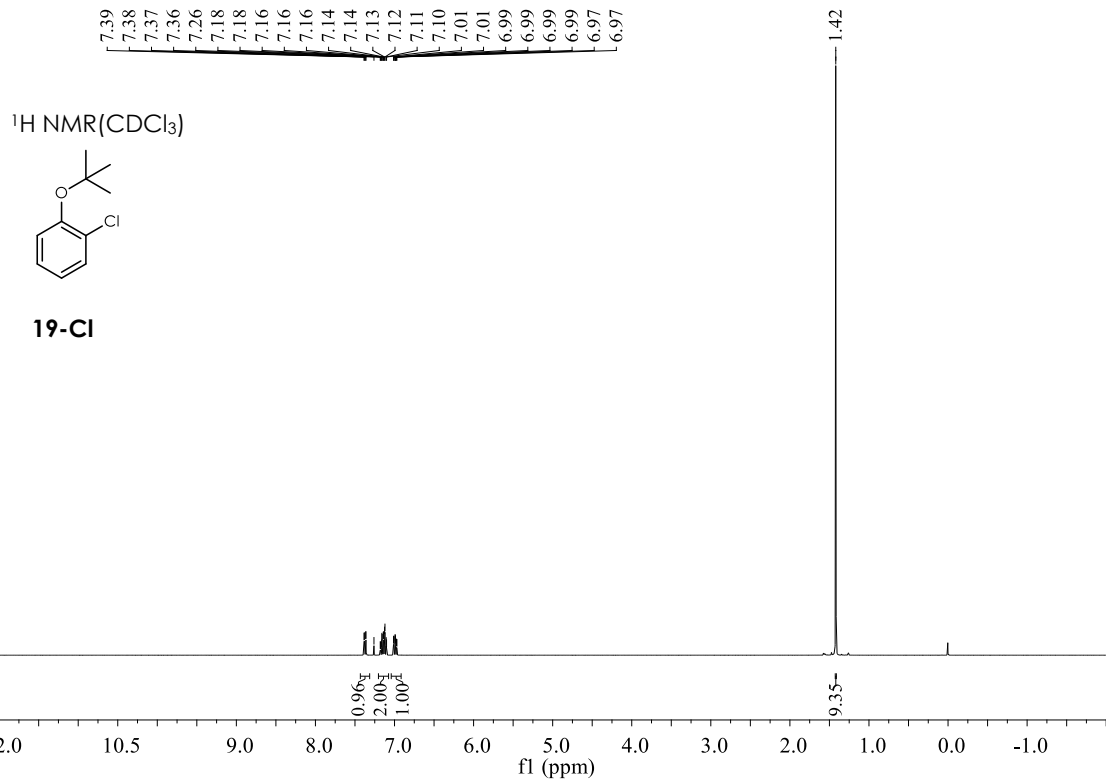

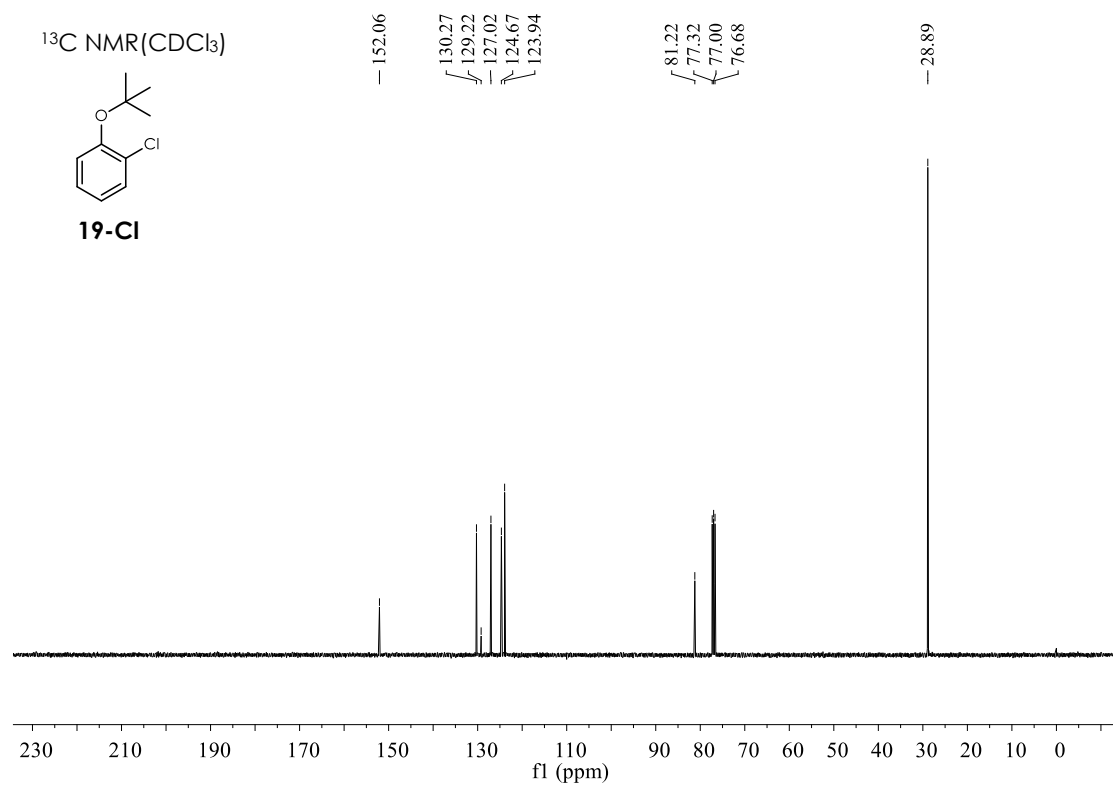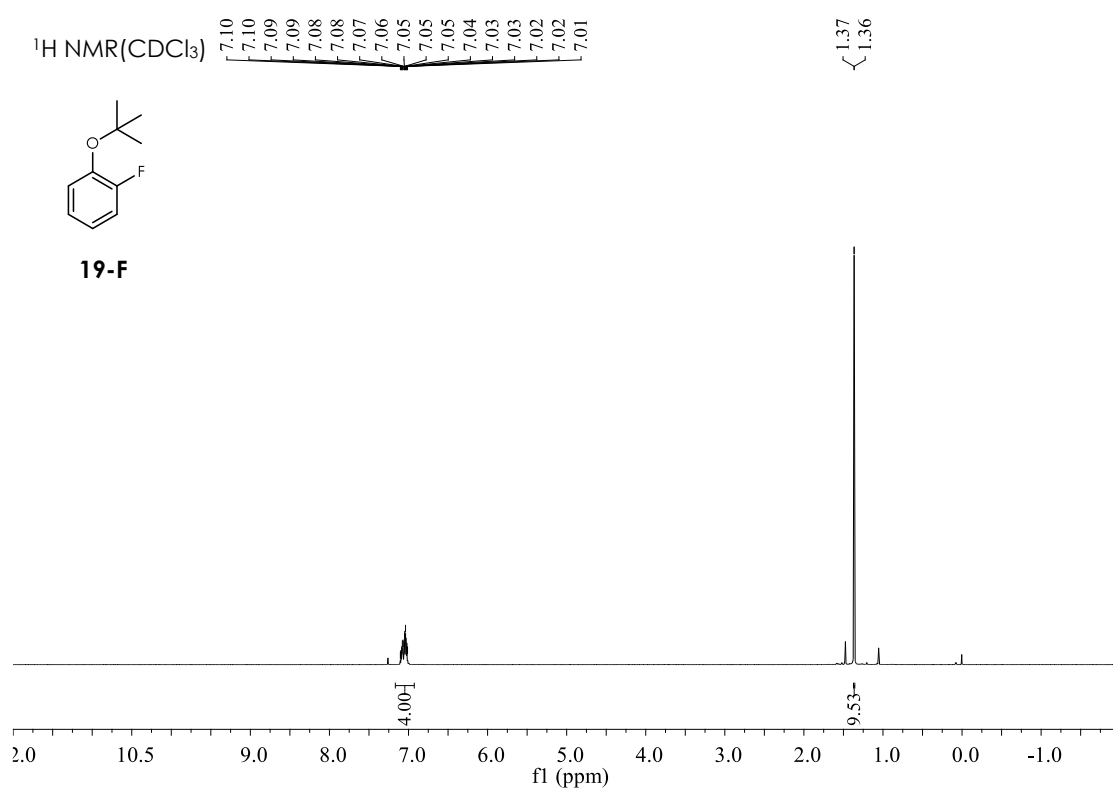

<sup>13</sup>C NMR (CDCl<sub>3</sub>)

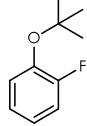

**19-F**

158.32  
155.87  
142.78  
142.66  
126.94  
124.39  
123.75  
116.53  
116.33  
80.48  
77.32  
77.00  
76.68  
28.47  
28.46

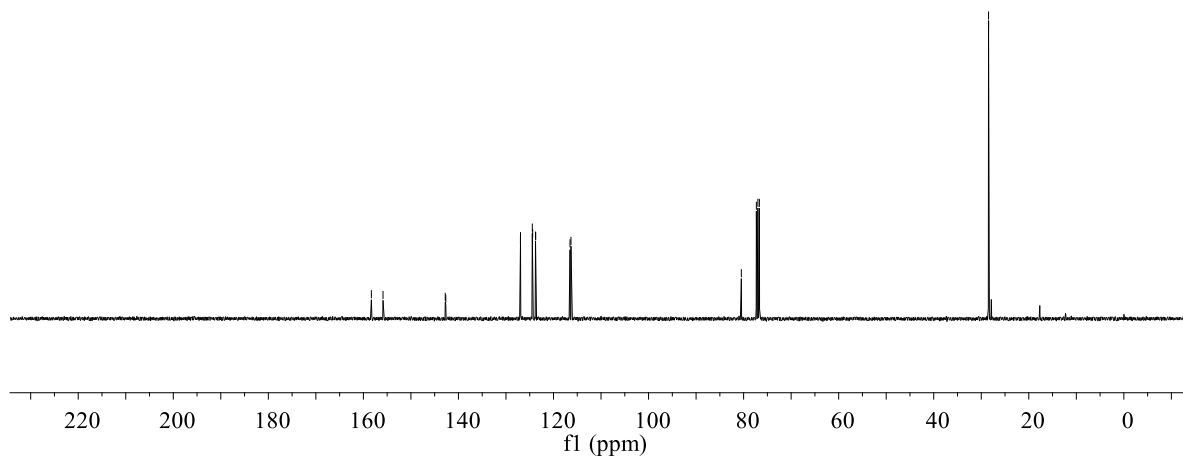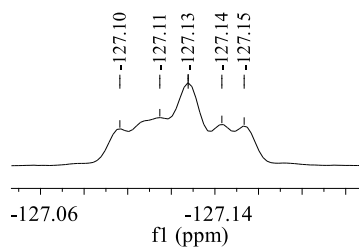

<sup>19</sup>F NMR (CDCl<sub>3</sub>)

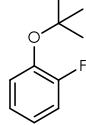

**19-F**

-127.10  
-127.11  
-127.13  
-127.14  
-127.15

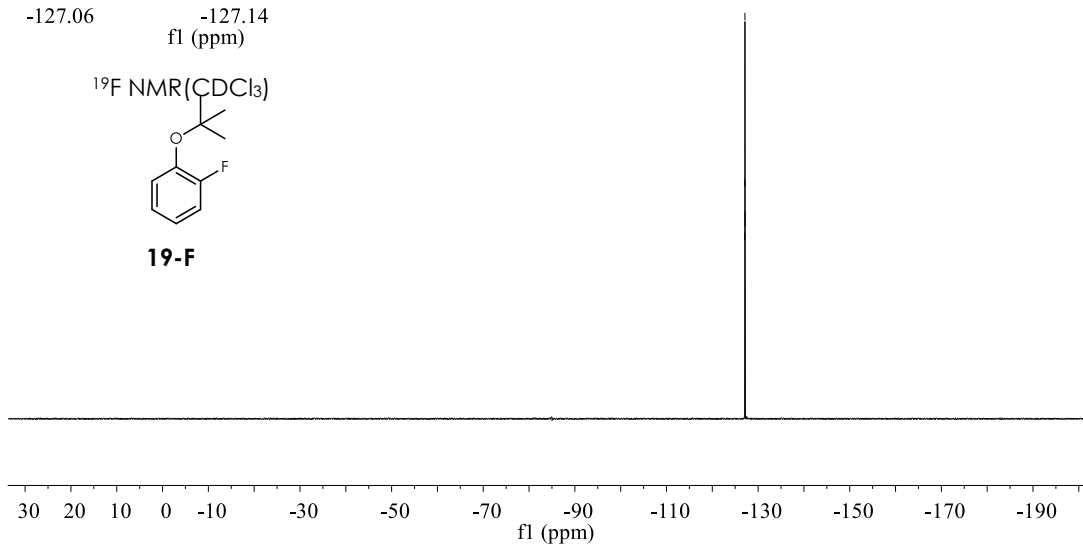

<sup>1</sup>H NMR (CDCl<sub>3</sub>)

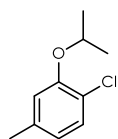

**20**

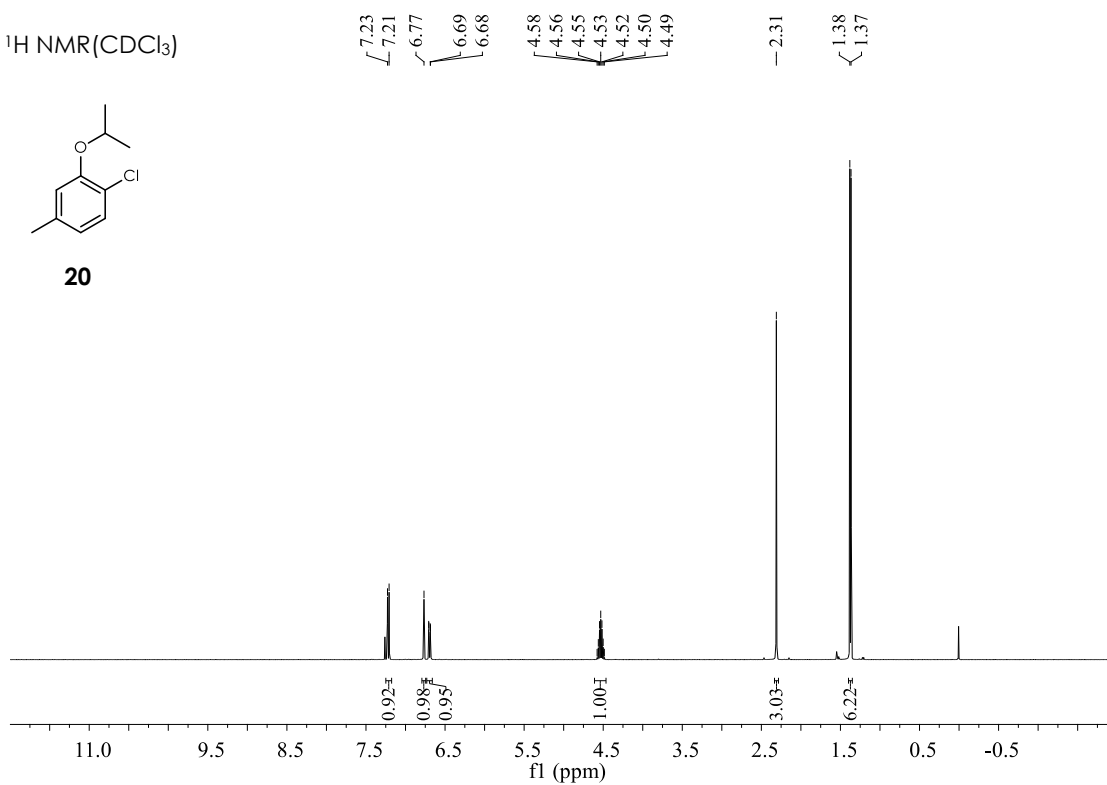

<sup>13</sup>C NMR (CDCl<sub>3</sub>)

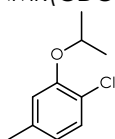

**20**

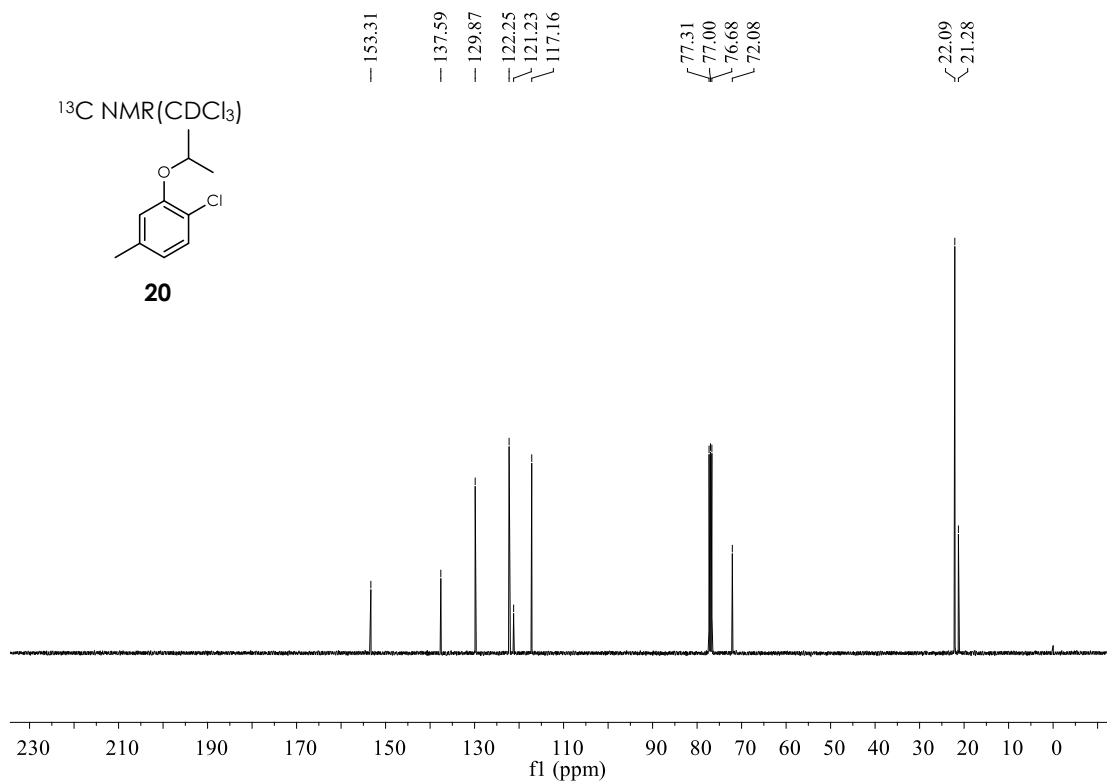

<sup>1</sup>H NMR(CDCl<sub>3</sub>)

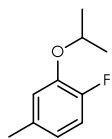

**20-F**

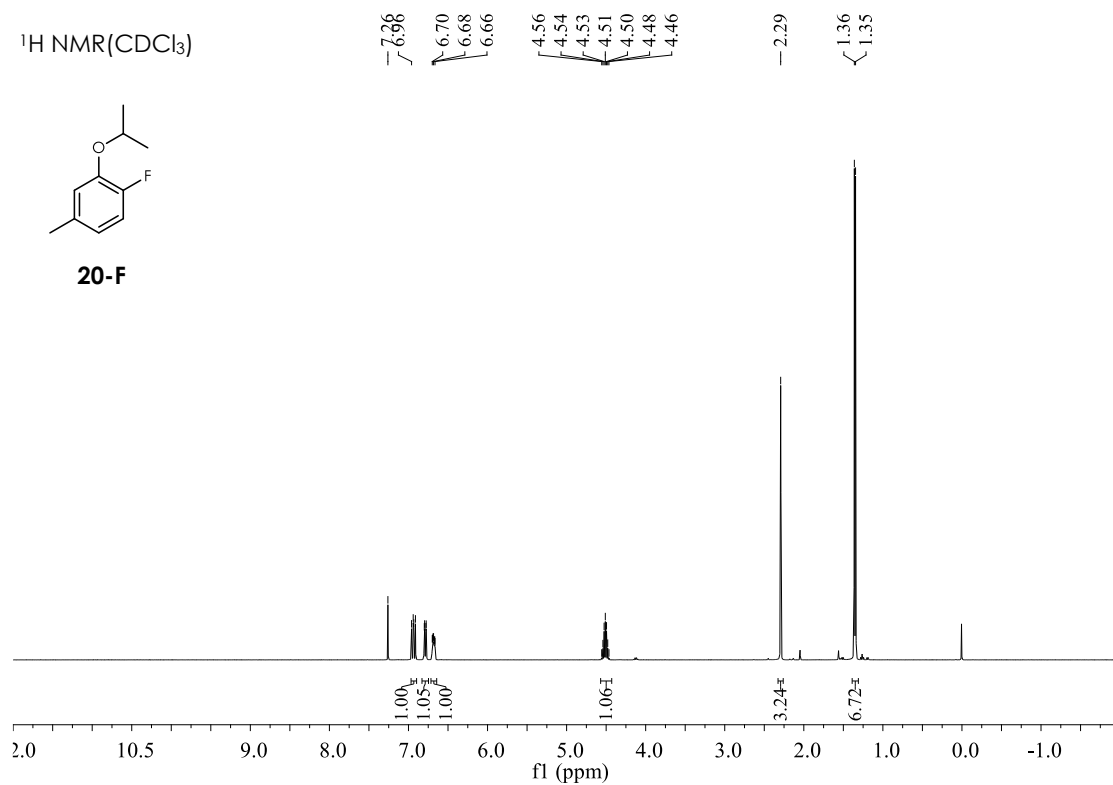

<sup>13</sup>C NMR(CDCl<sub>3</sub>)

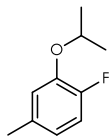

**20-F**

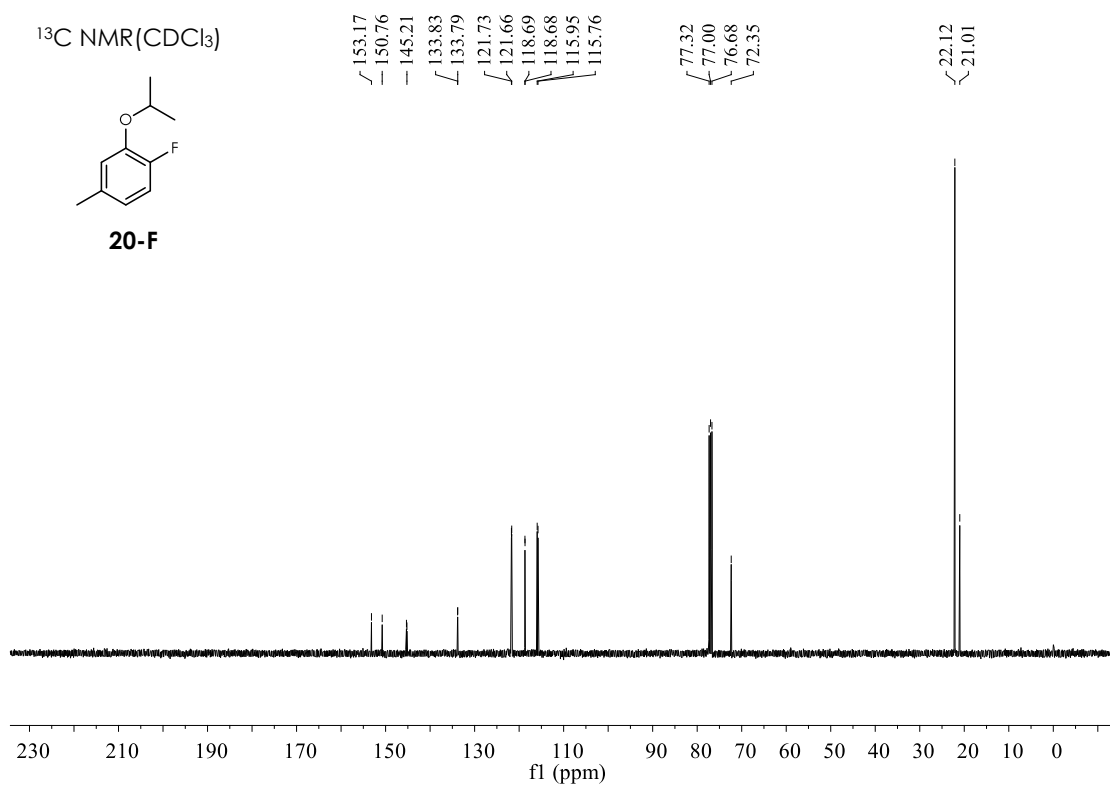

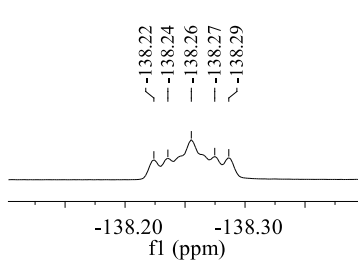

$^{19}\text{F}$  NMR( $\text{CDCl}_3$ )

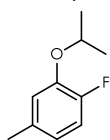

**20-F**

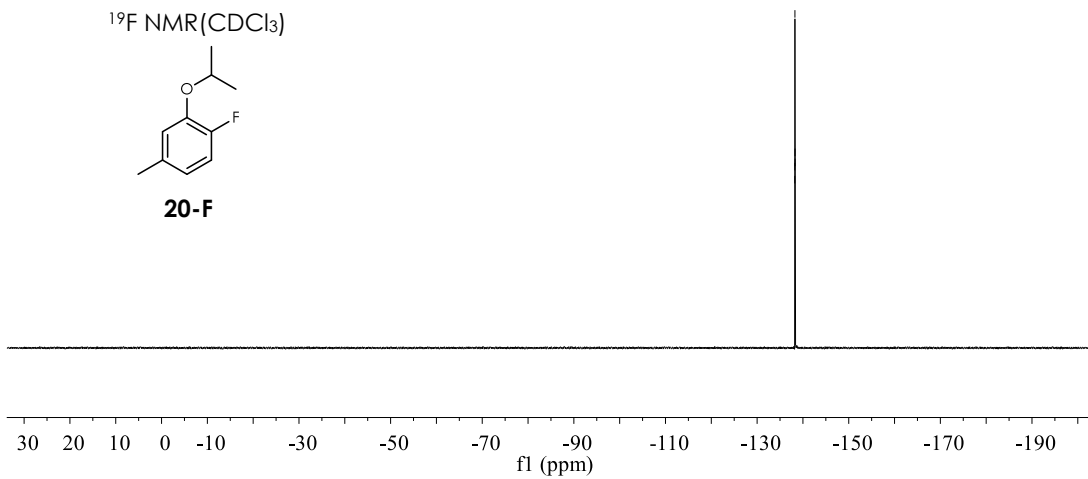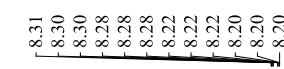

$^1\text{H}$  NMR( $\text{CDCl}_3$ )

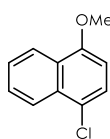

**22**

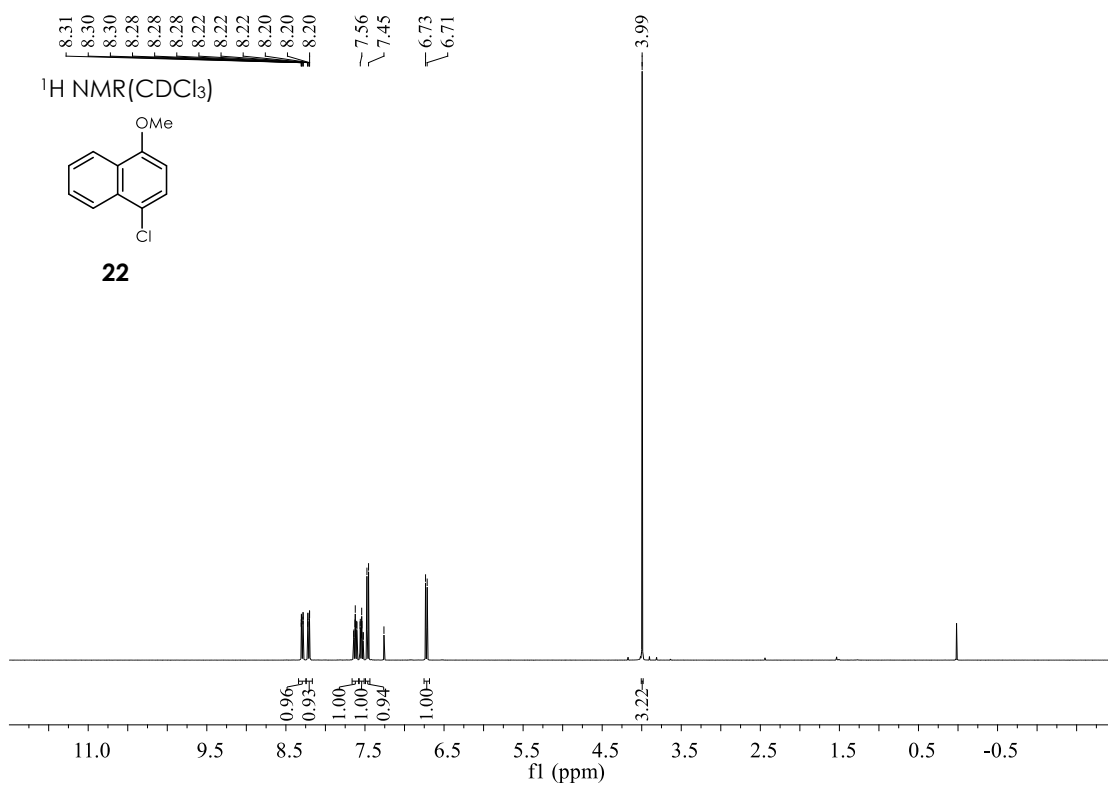

$^{13}\text{C}$  NMR ( $\text{CDCl}_3$ )

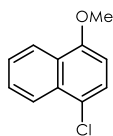

**22**

— 154.55  
— 127.44  
— 125.89  
— 125.72  
— 124.19  
— 123.16  
— 122.38  
— 103.77  
— 77.32  
— 77.00  
— 76.68  
— 55.66

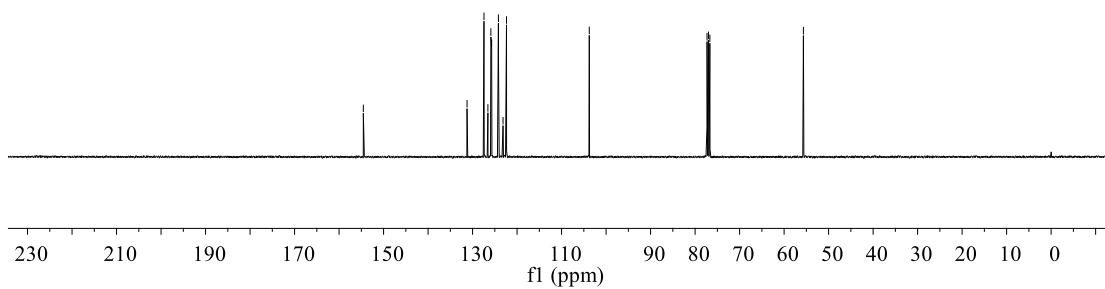

8.32  
8.32  
8.30  
8.30  
8.21  
8.20  
8.18  
8.18  
7.54  
7.26  
6.76  
6.74  
4.77  
4.75  
4.74  
4.72  
4.71  
4.69  
4.68  
1.46  
1.45

$^1\text{H}$  NMR ( $\text{CDCl}_3$ )

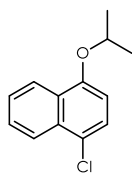

**23**

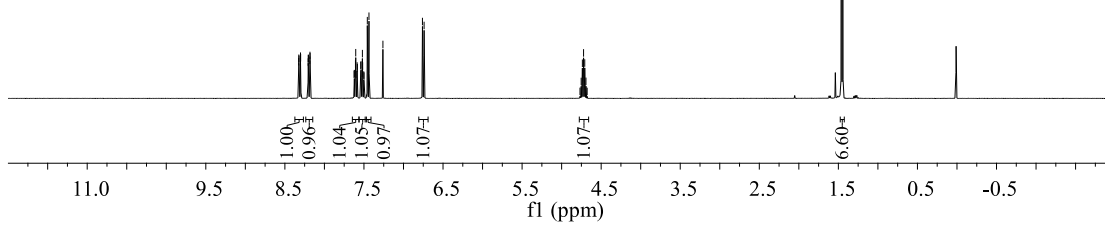



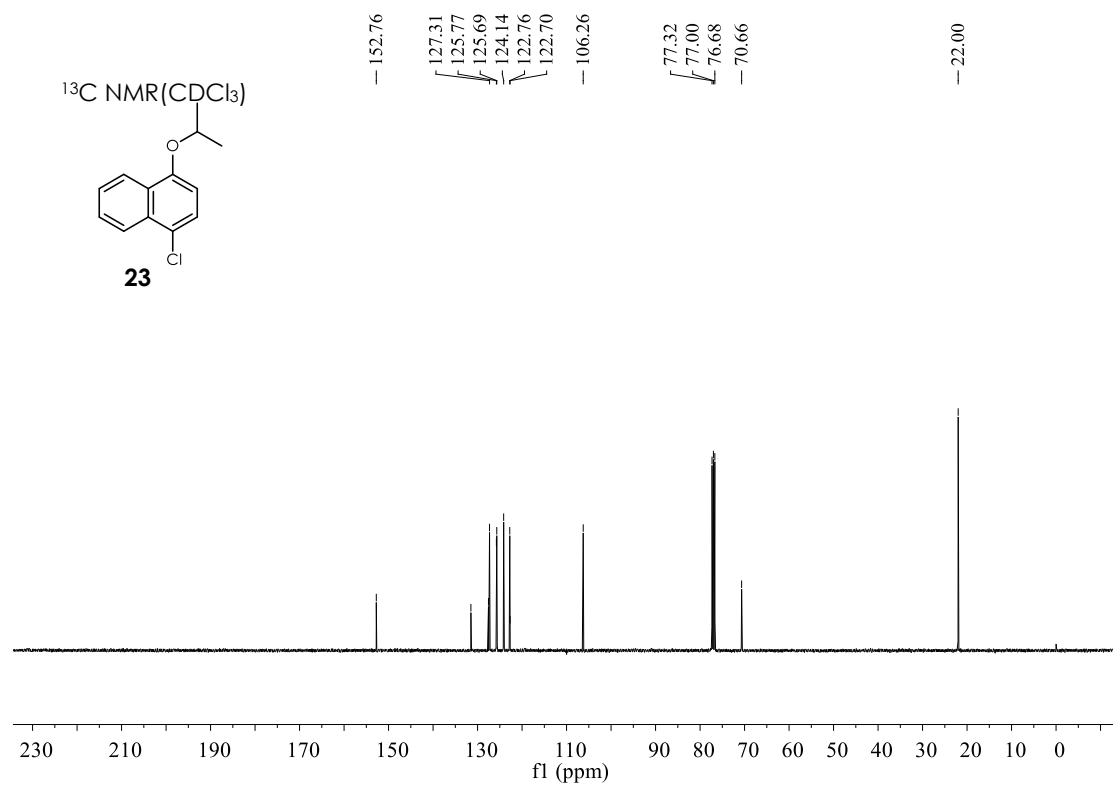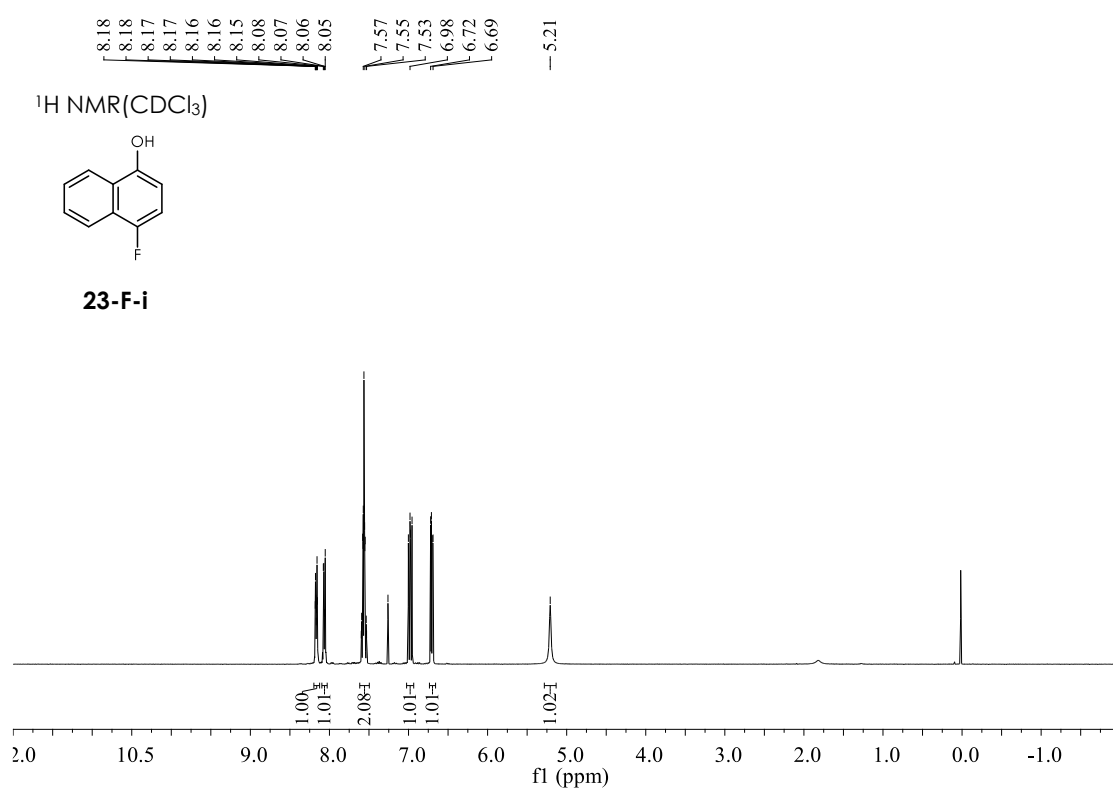

$^{13}\text{C}$  NMR ( $\text{CDCl}_3$ )

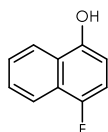

**23-F-i**

154.40  
151.98  
147.33  
147.29  
126.17  
125.04  
121.76  
120.50  
108.82  
108.60  
107.51  
107.43  
77.32  
77.00  
76.68

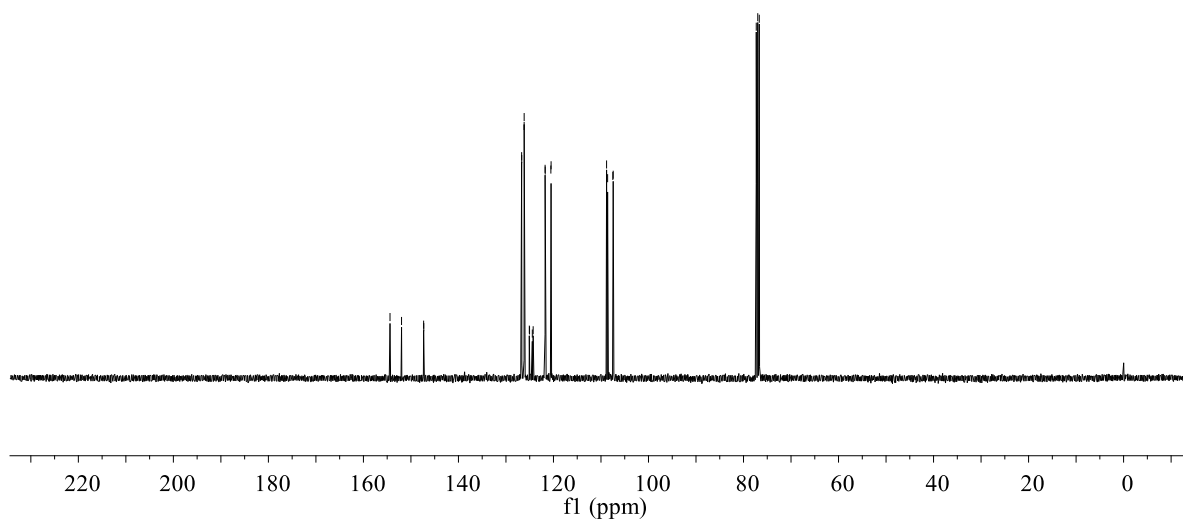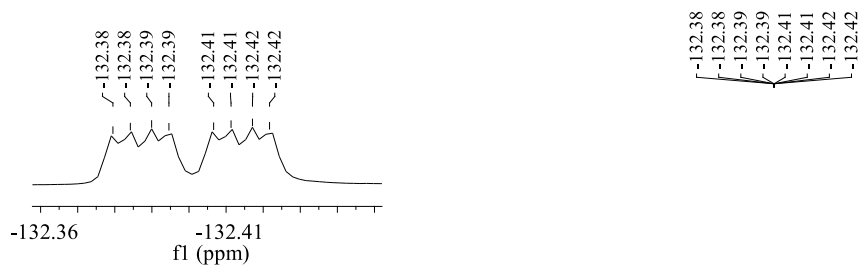

$^{19}\text{F}$  NMR ( $\text{CDCl}_3$ )

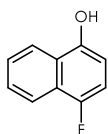

**23-F-i**

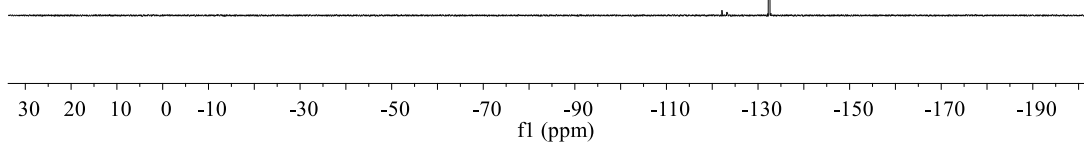

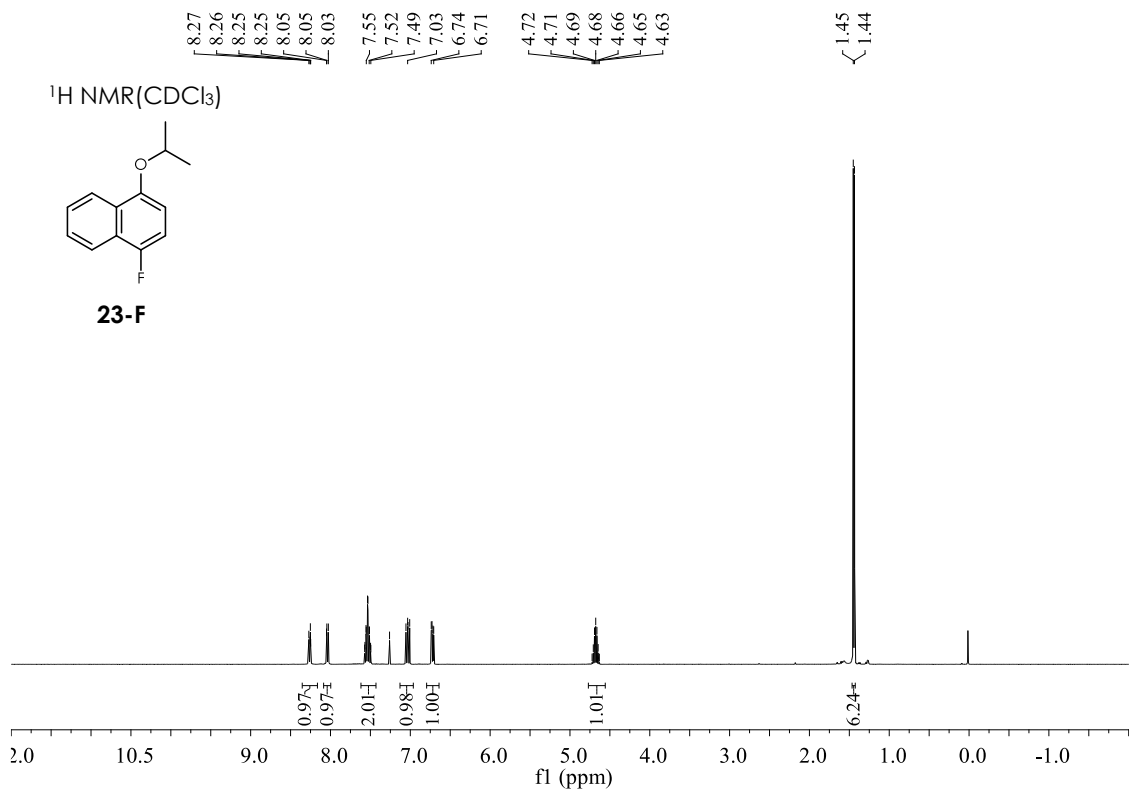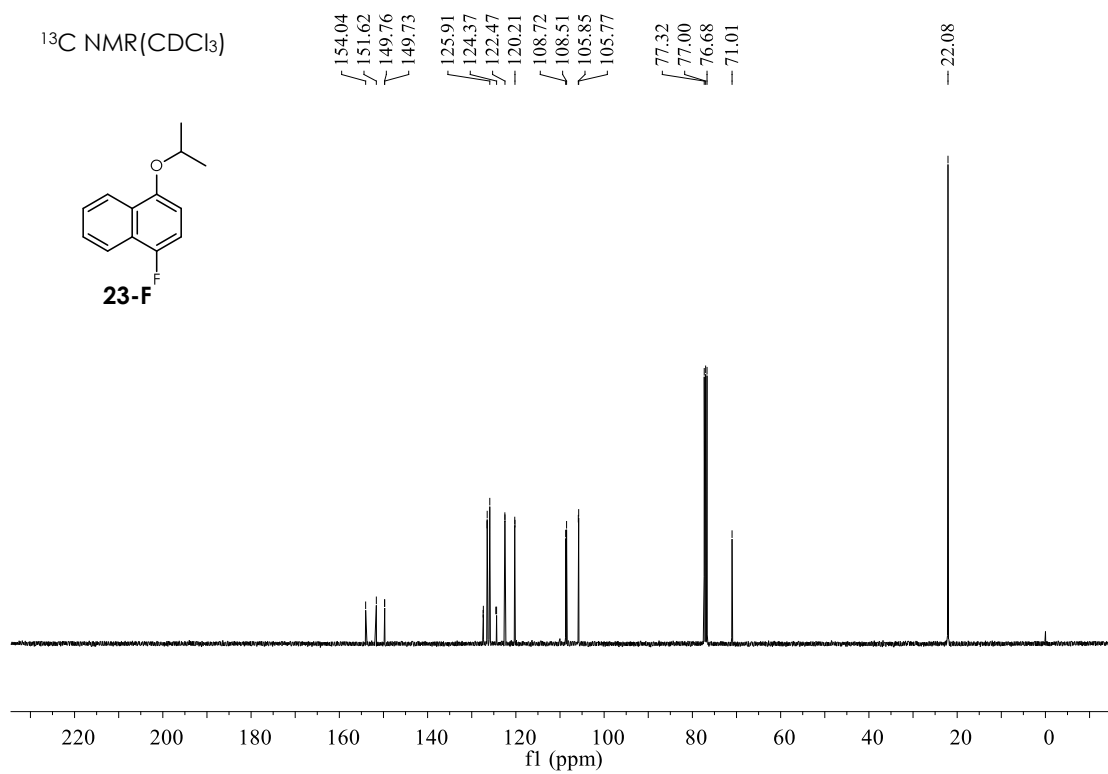

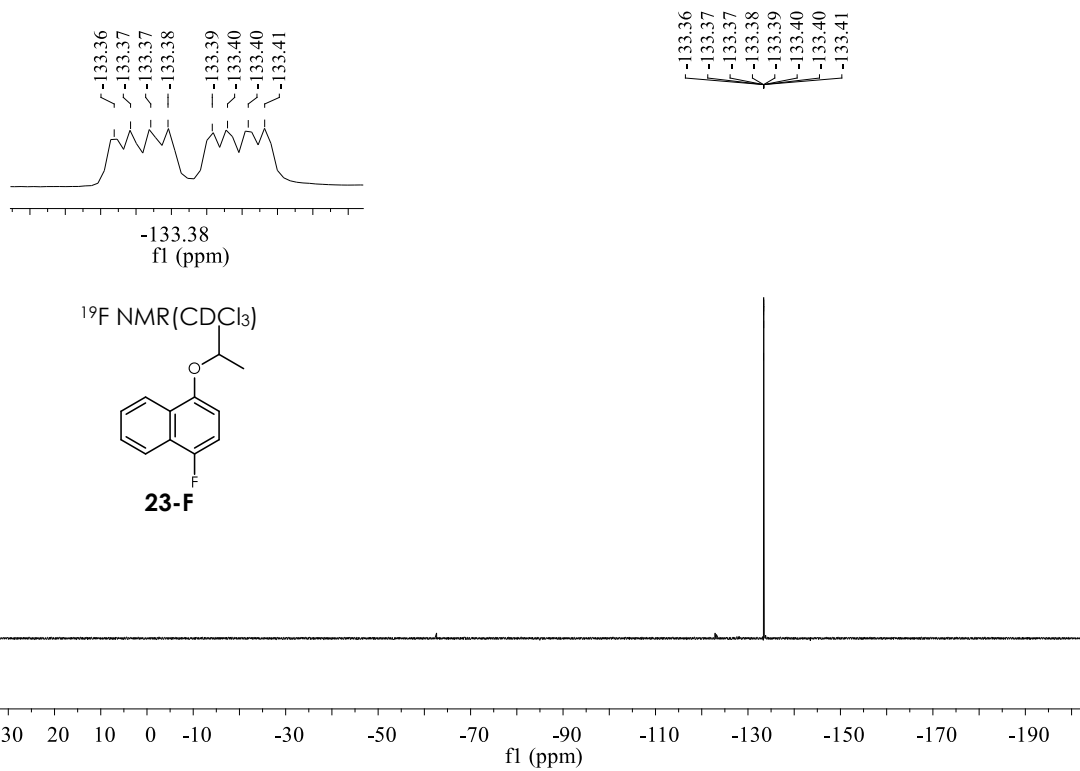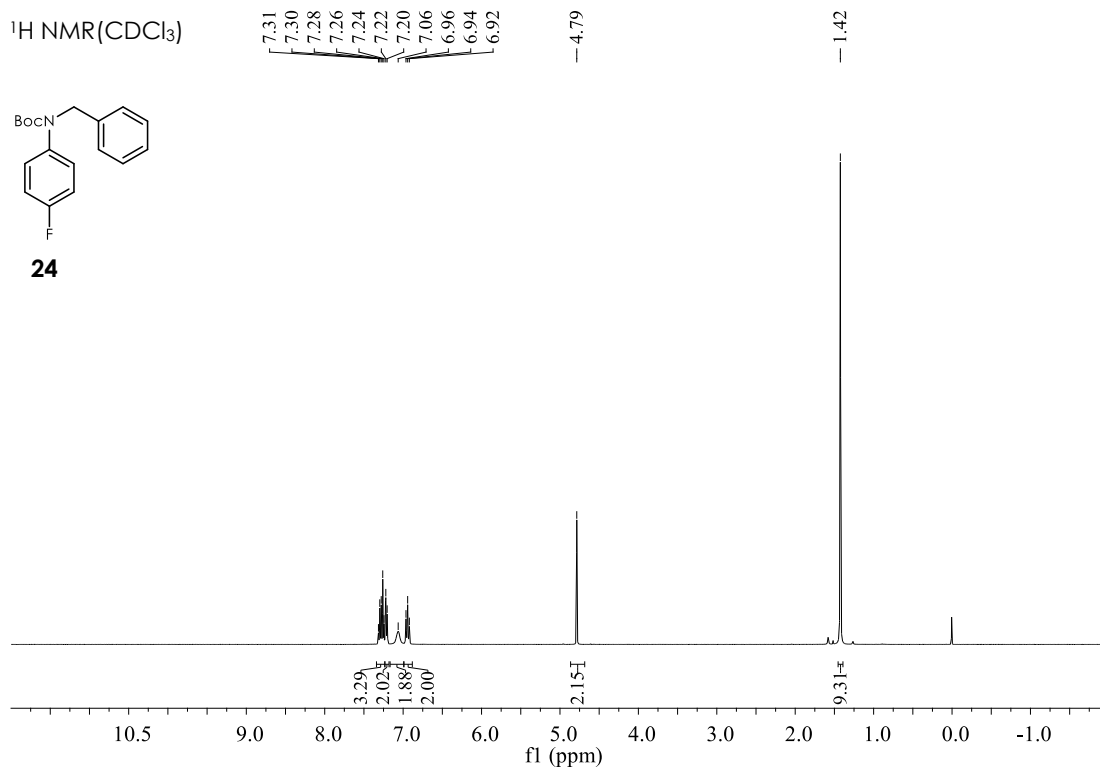

<sup>13</sup>C NMR(CDCl<sub>3</sub>)

161.81  
159.37  
154.83  
138.27  
127.19  
115.50  
115.28  
80.63  
77.32  
77.00  
76.68  
54.03  
28.26

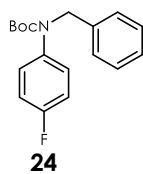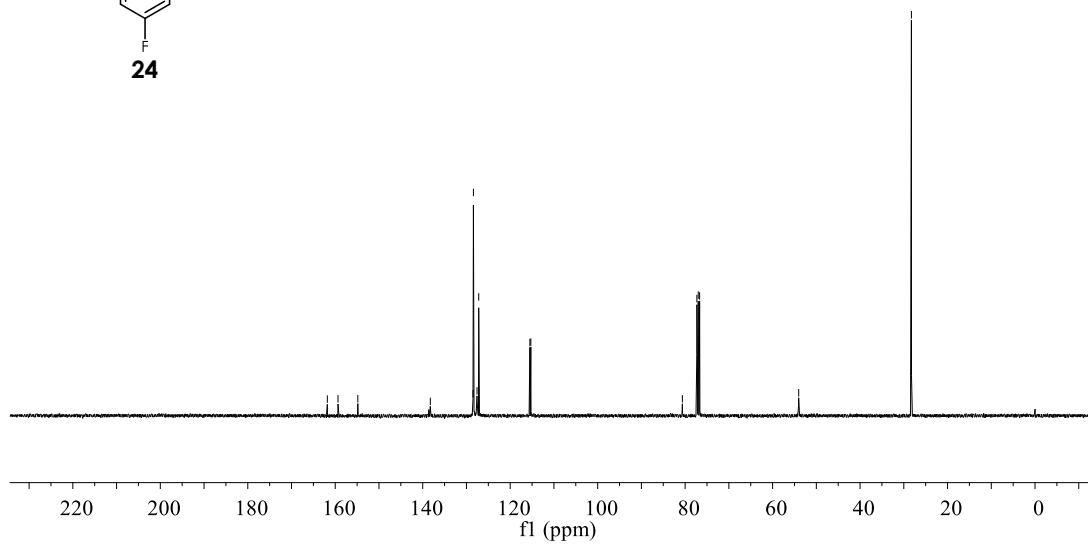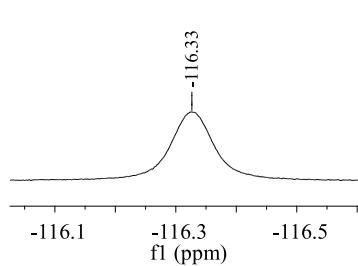

<sup>19</sup>F NMR(CDCl<sub>3</sub>)

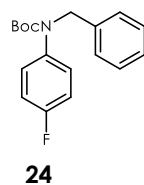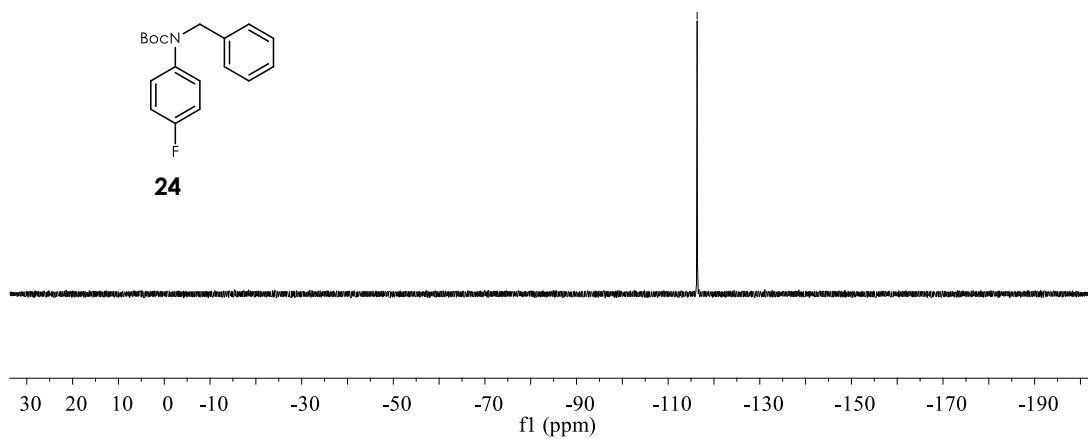

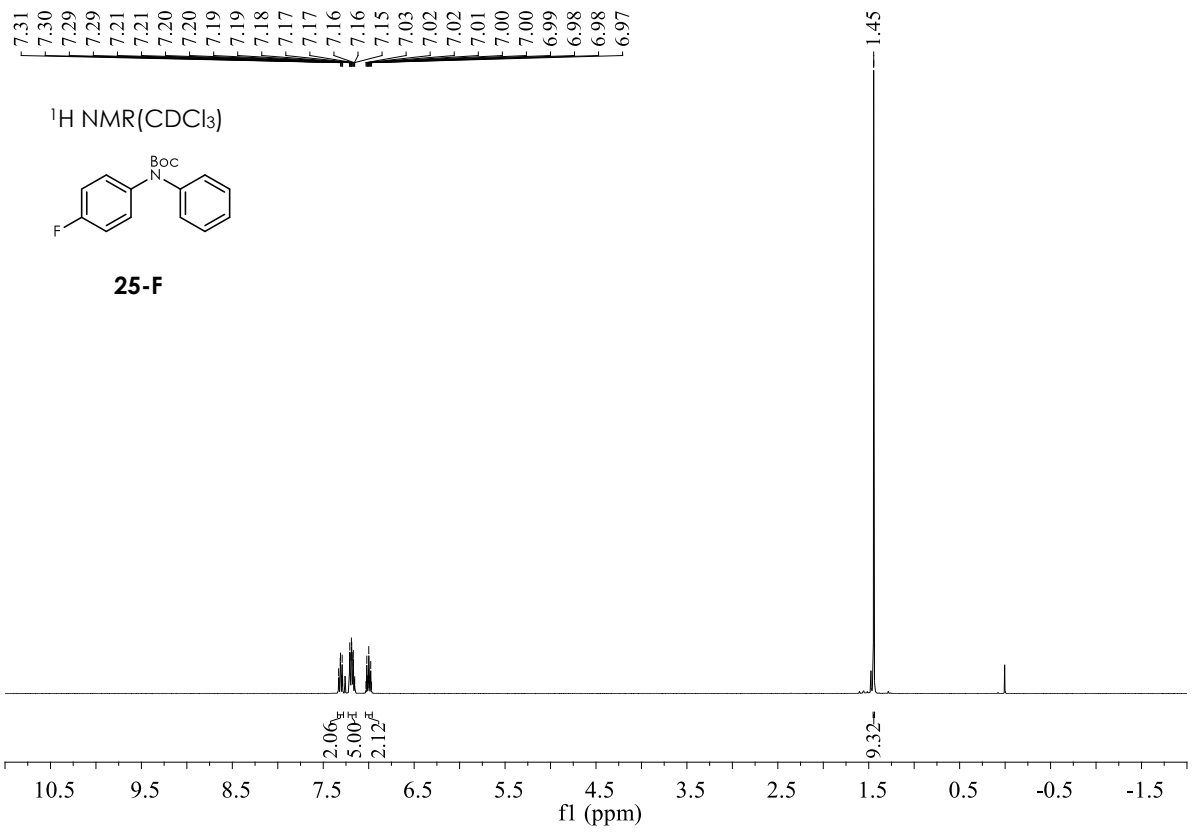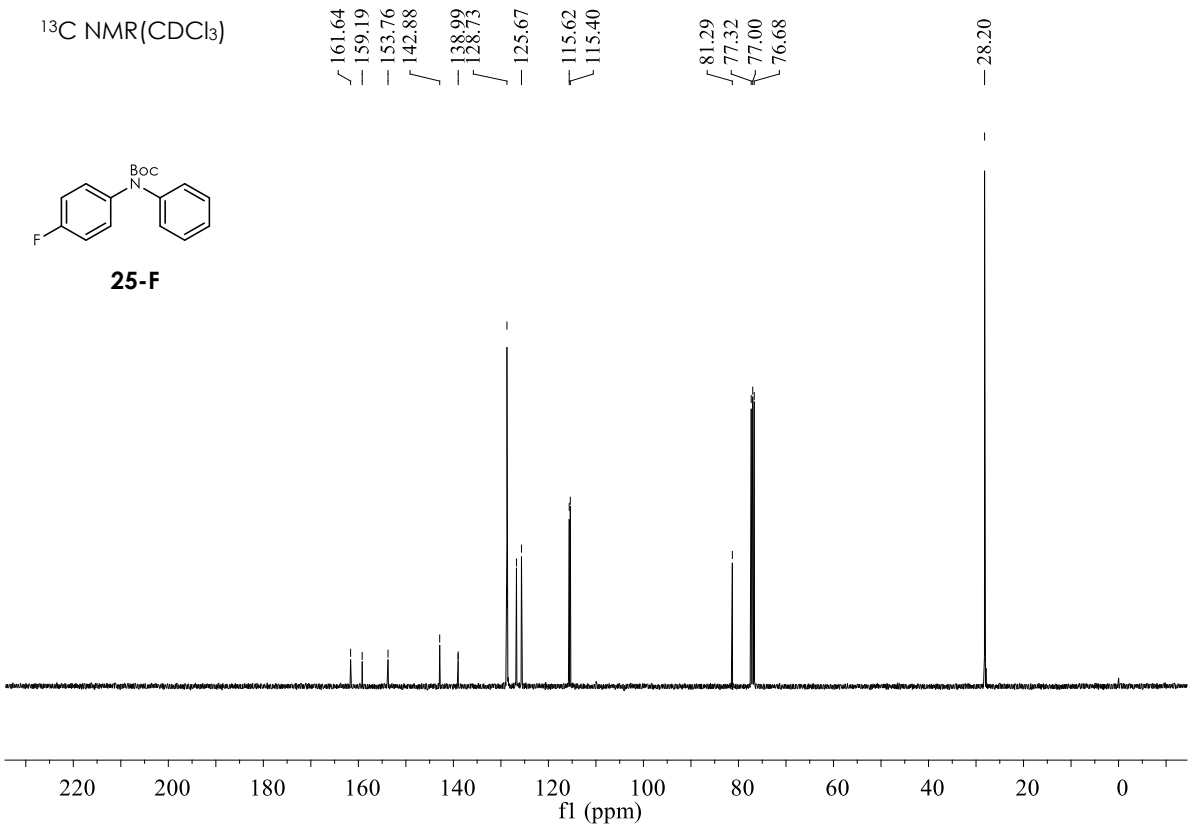

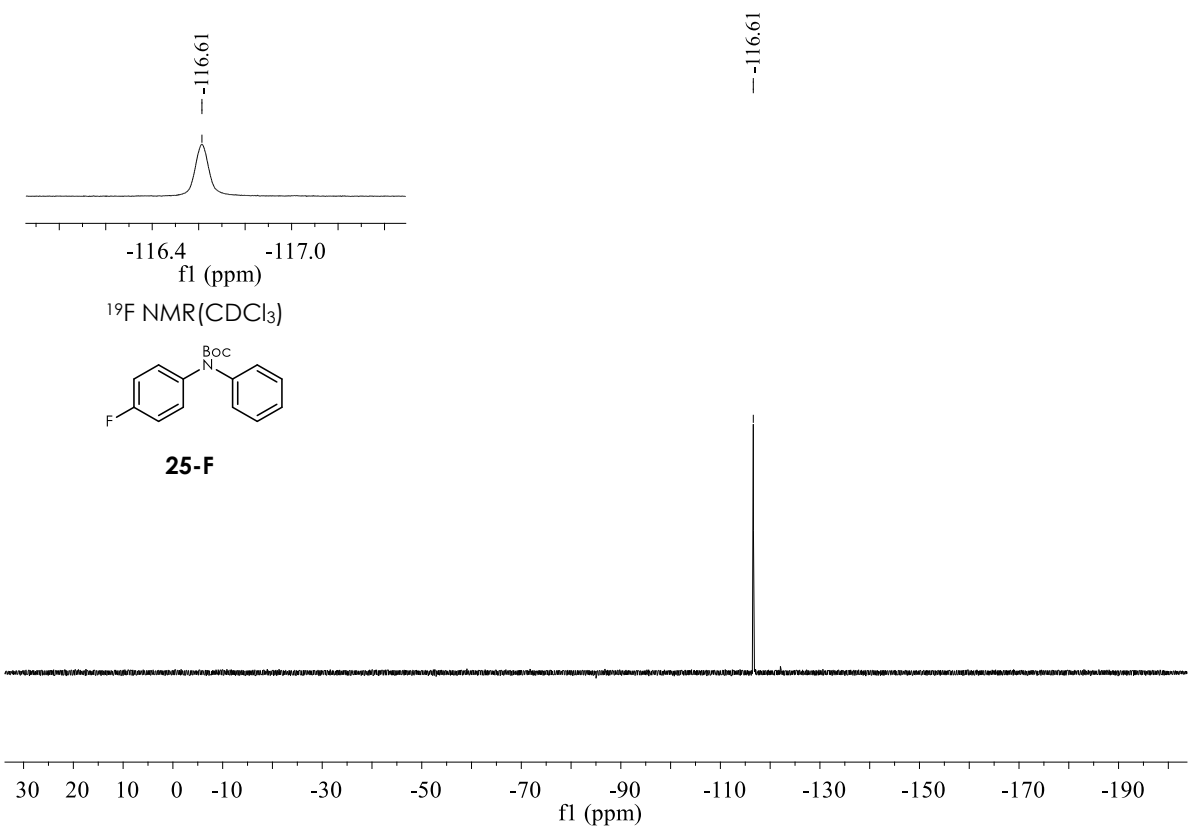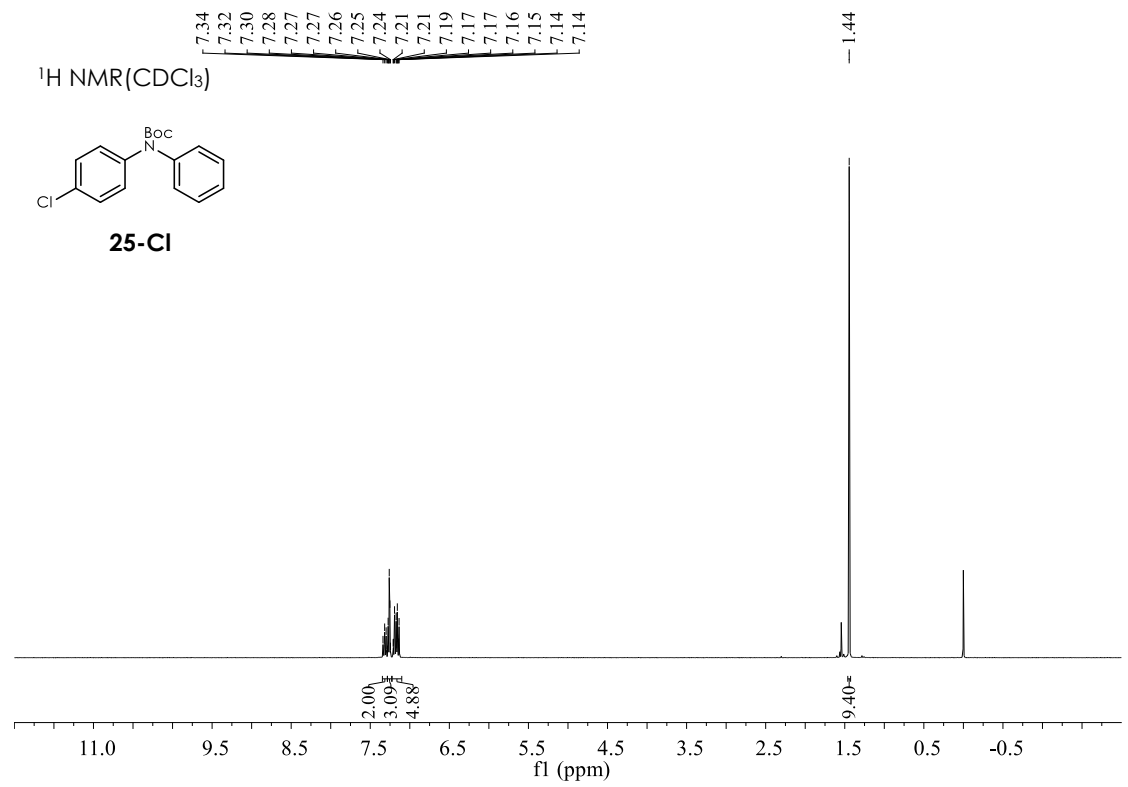

$^{13}\text{C}$  NMR( $\text{CDCl}_3$ )

153.54  
142.62  
141.64  
130.95  
128.83  
128.76  
127.99  
127.05  
125.95

81.49  
77.32  
77.00  
76.68

28.20

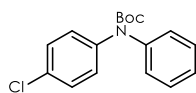

**25-Cl**

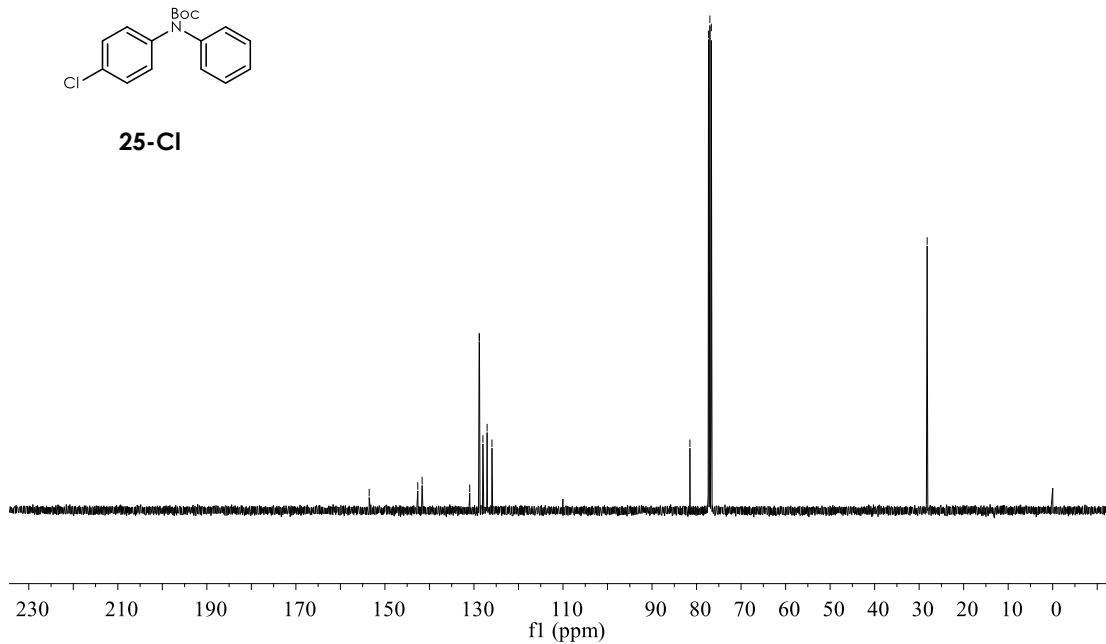

$^1\text{H}$  NMR( $\text{CDCl}_3$ )

7.39  
7.26  
7.24  
7.23  
7.04

2.06

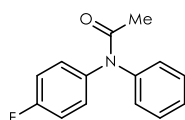

**26**

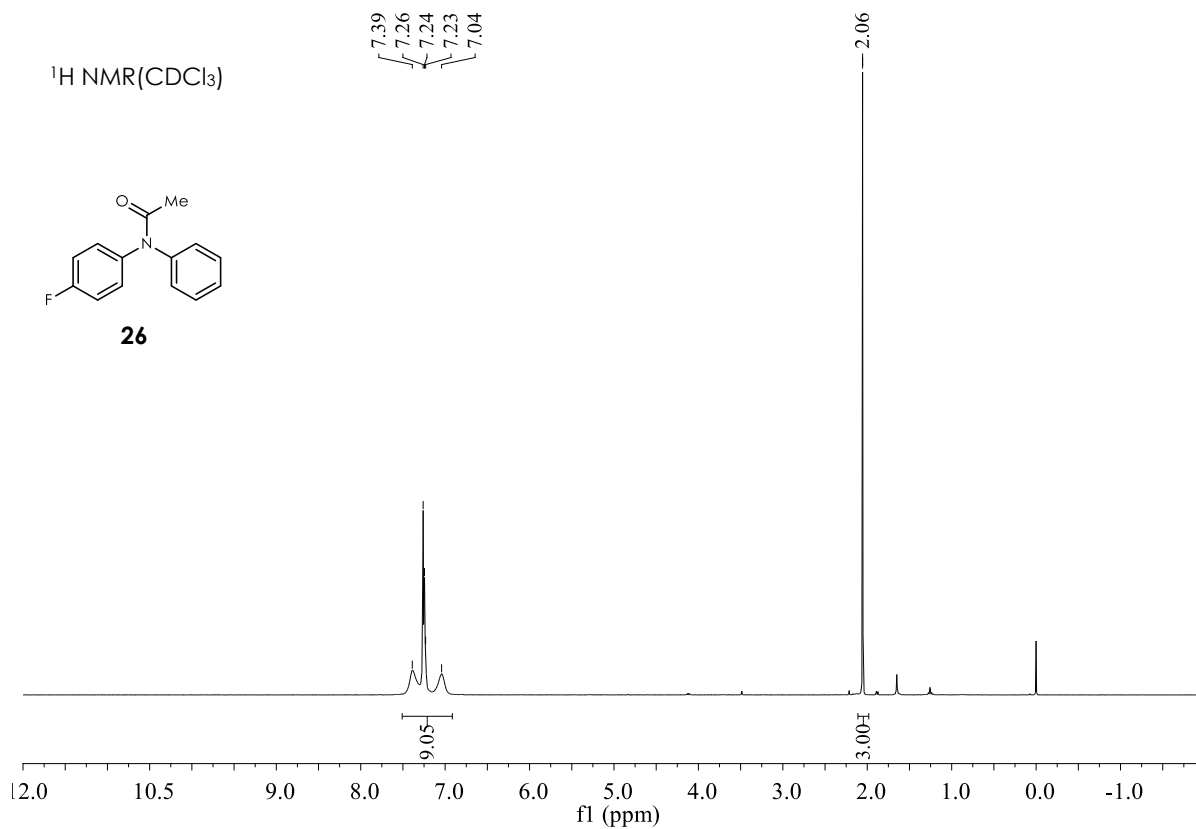



$^{13}\text{C}$  NMR ( $\text{CDCl}_3$ )

170.17  
170.17  
161.93  
159.99  
143.08  
139.07  
139.07  
127.22  
115.87  
115.87  
77.25  
77.00  
76.74  
23.61  
23.55  
23.55  
23.49  
23.49  
23.49  
23.43  
23.43  
23.43  
23.38  
23.38  
23.32

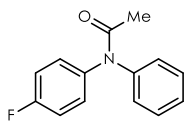

**26**

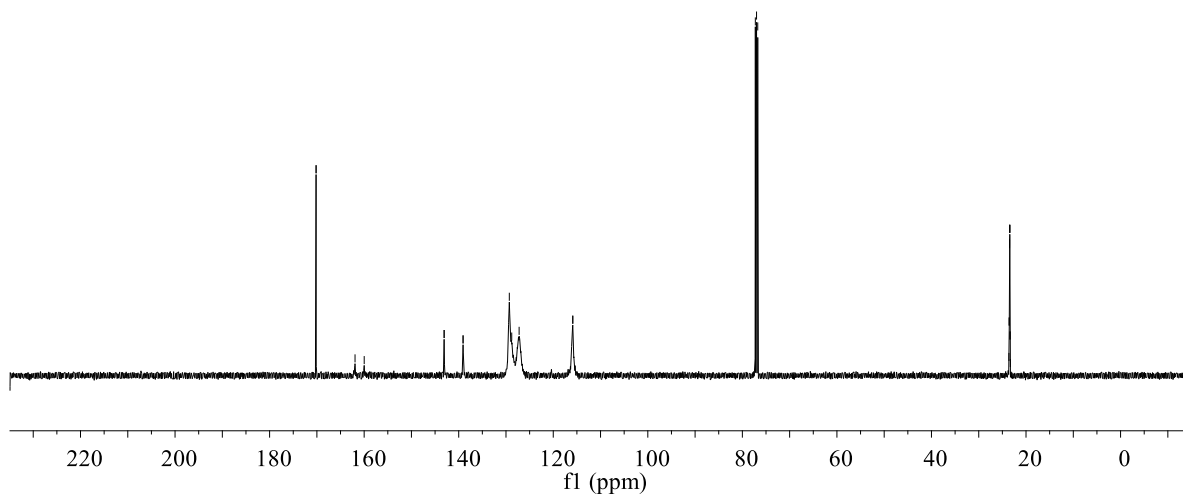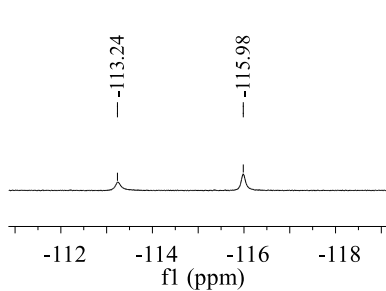

$^{19}\text{F}$  NMR ( $\text{CDCl}_3$ )

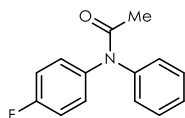

**26**

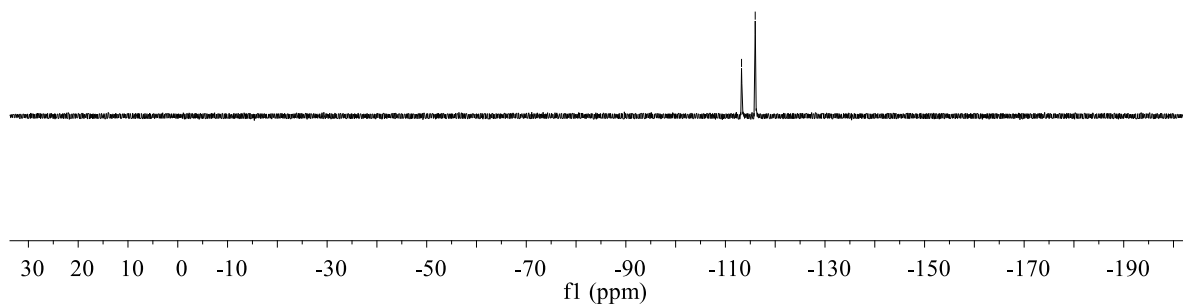

7.45  
7.43  
7.43  
7.32  
7.32  
7.31  
7.30  
7.30  
7.29  
7.29  
7.28  
7.28  
7.26  
7.26  
7.24  
7.24  
7.22  
7.22  
7.20  
7.20  
7.18  
7.16  
7.15  
7.14  
7.13  
7.11  
7.01  
7.01  
6.99  
6.98  
6.97

<sup>1</sup>H NMR(CDCl<sub>3</sub>)

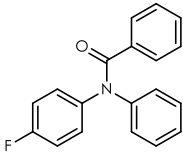

**27**

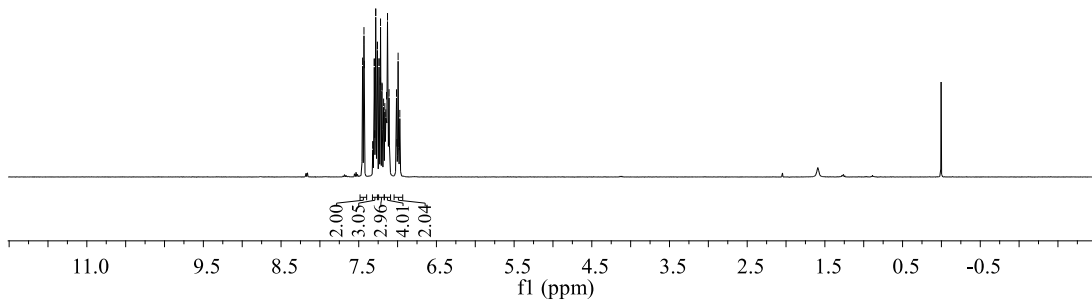

<sup>13</sup>C NMR(CDCl<sub>3</sub>)

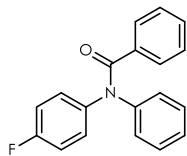

**27**

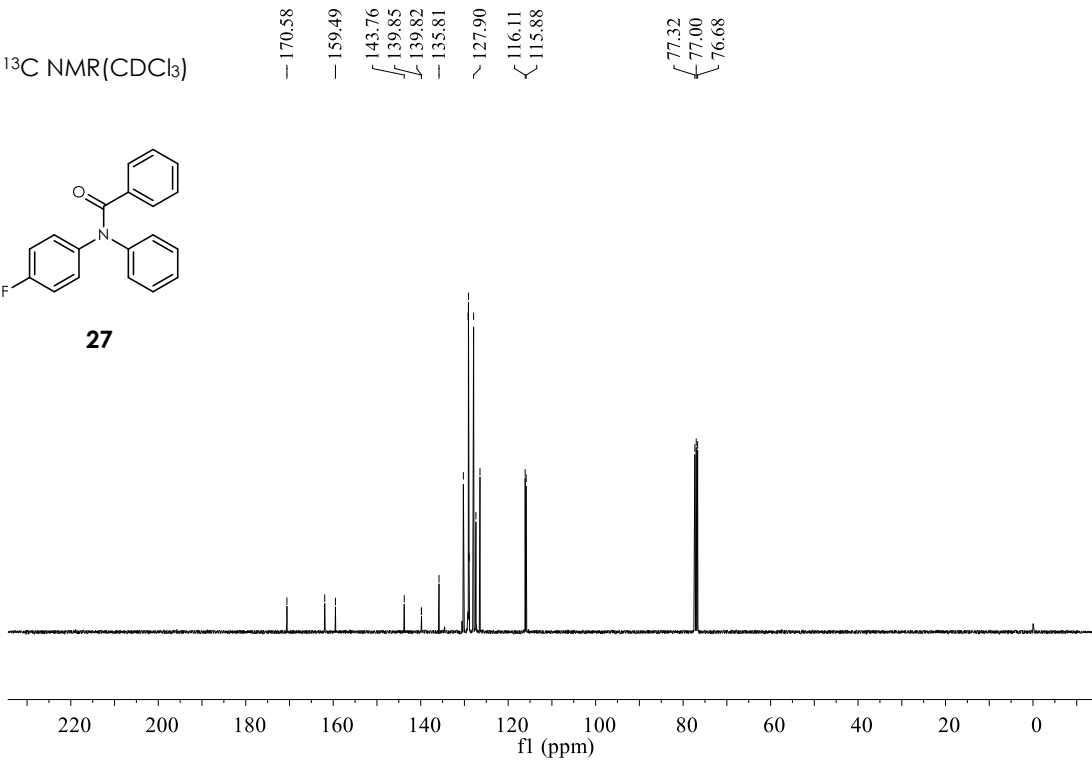

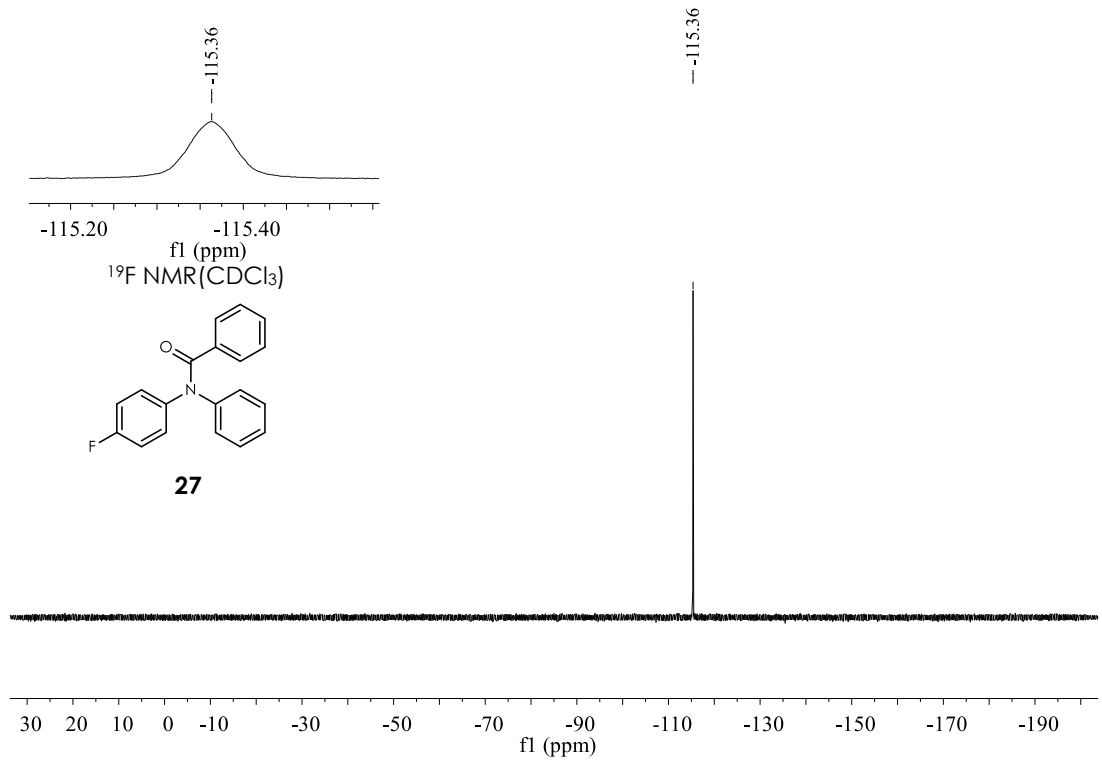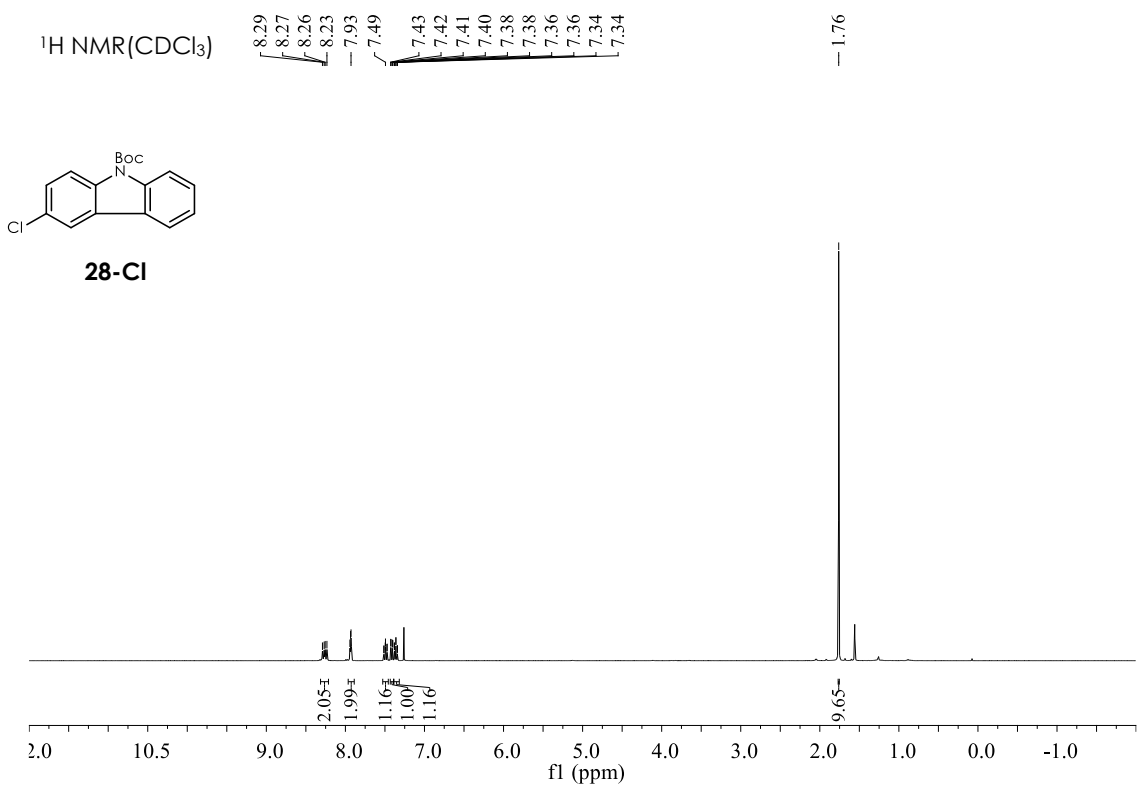

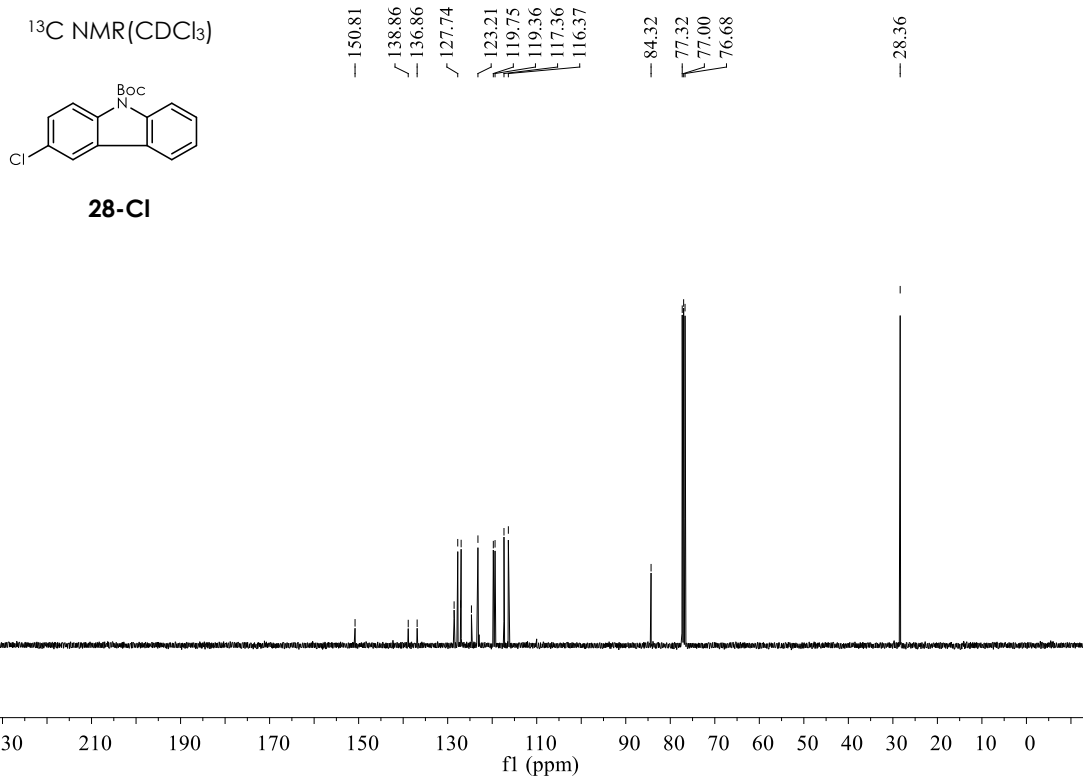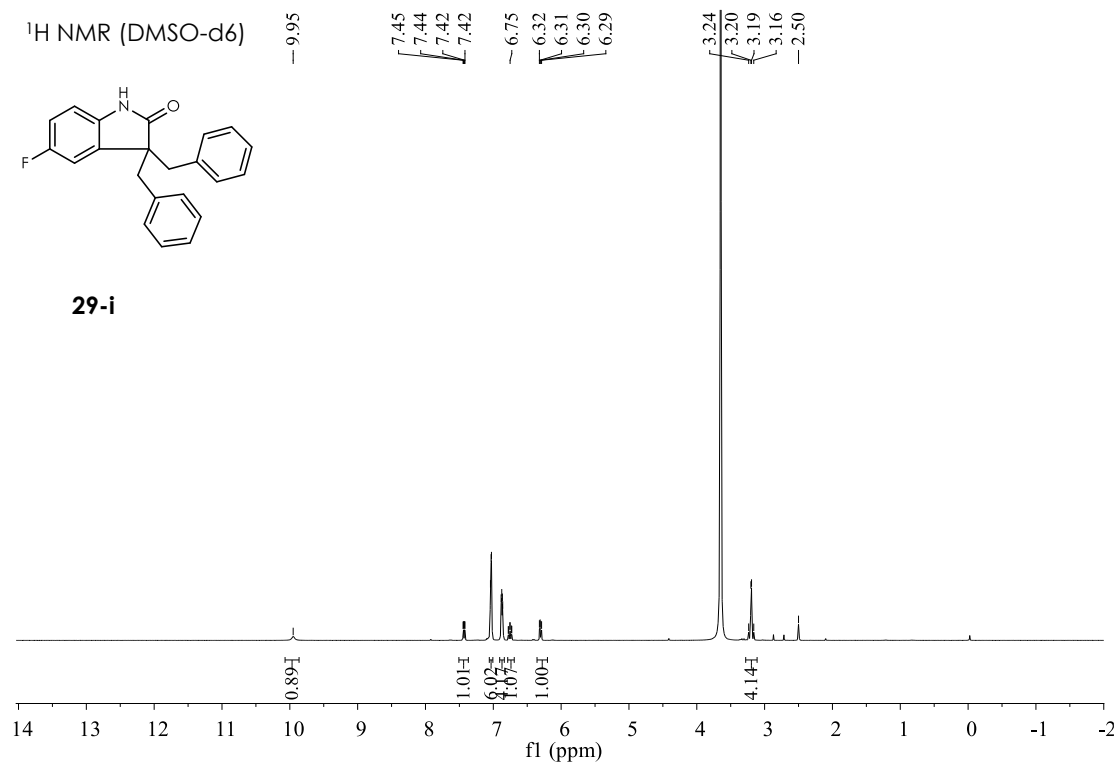

<sup>13</sup>C NMR (DMSO-d<sub>6</sub>)

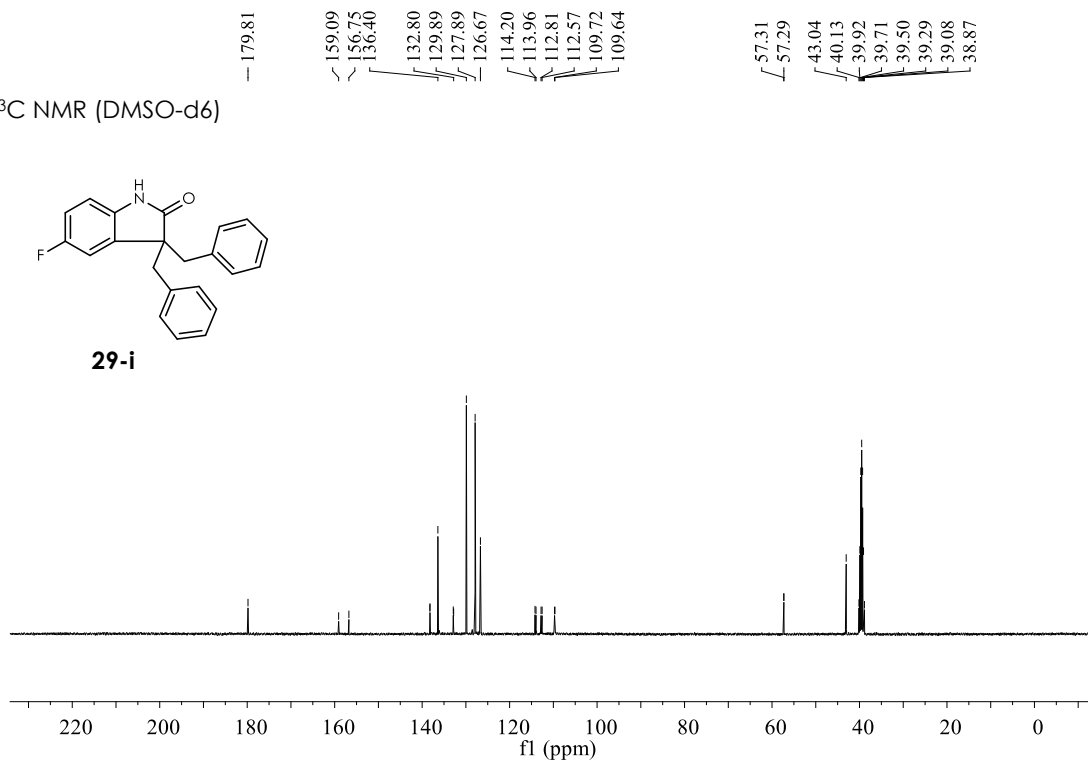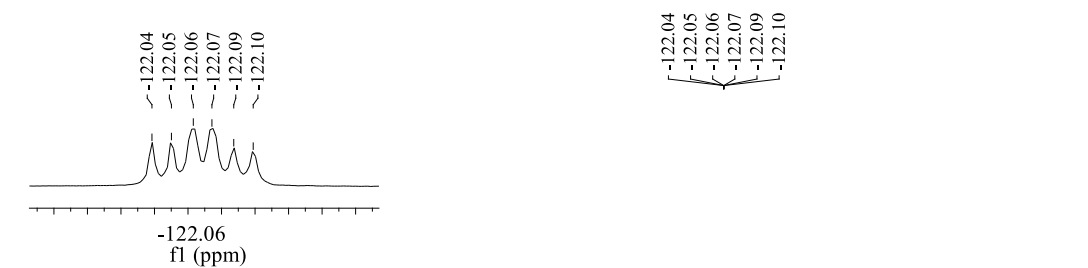

<sup>19</sup>F NMR (DMSO-d<sub>6</sub>)

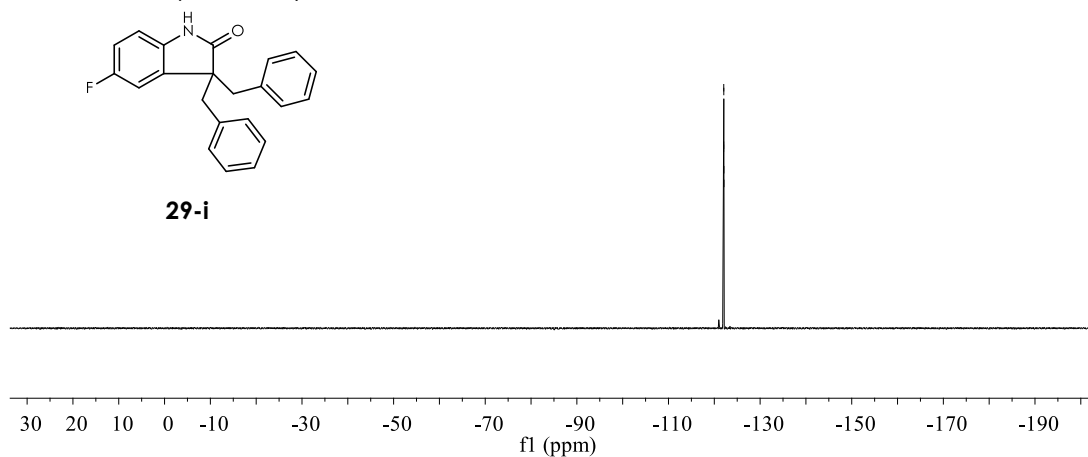

7.13  
7.11  
7.09  
7.08  
7.07  
7.06  
7.05  
7.04  
7.02  
6.97  
6.95  
6.95  
6.68  
6.67  
6.66  
6.65  
6.64  
6.63  
6.37  
6.36  
6.03  
6.02  
6.01  
-4.50  
3.44  
3.41  
3.24  
3.21

<sup>1</sup>H NMR(CDCl<sub>3</sub>)

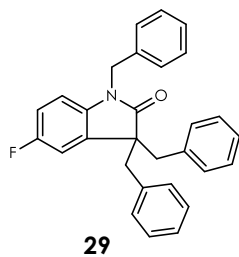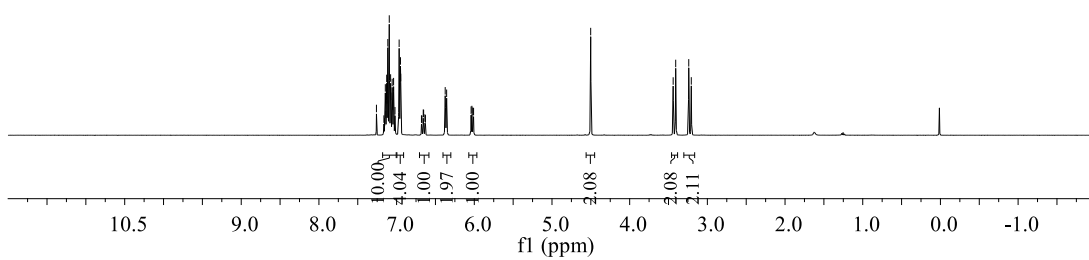

<sup>13</sup>C NMR(CDCl<sub>3</sub>)

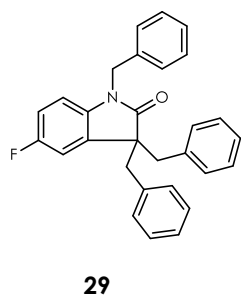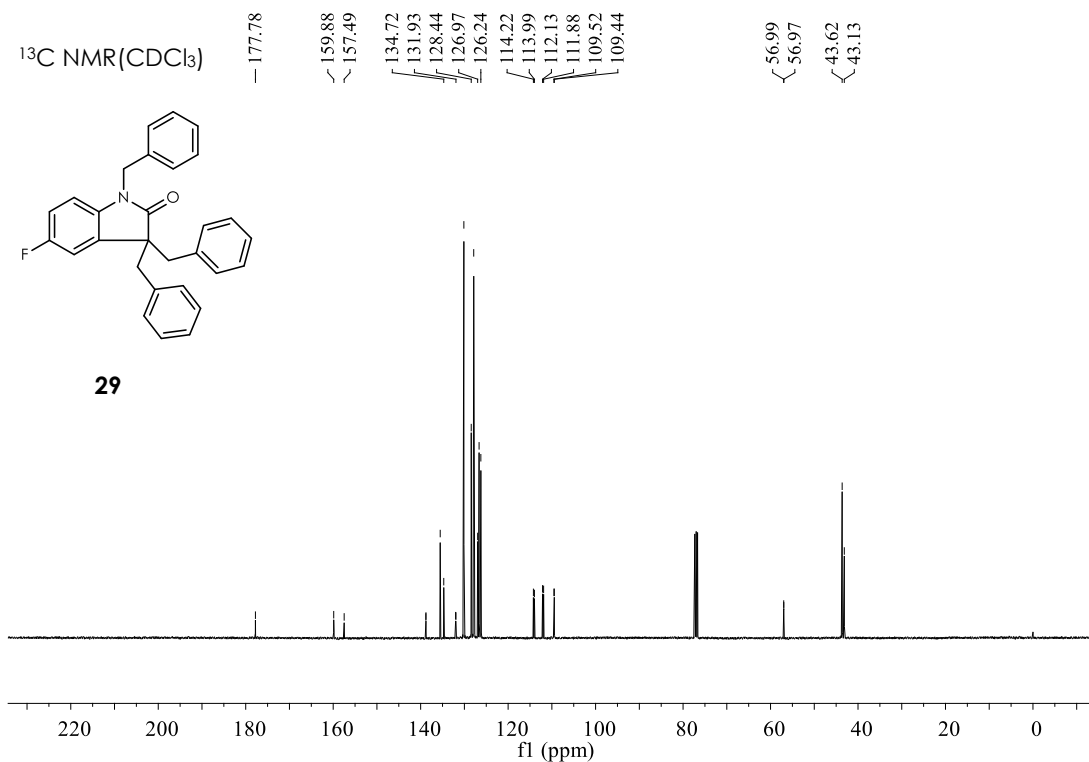

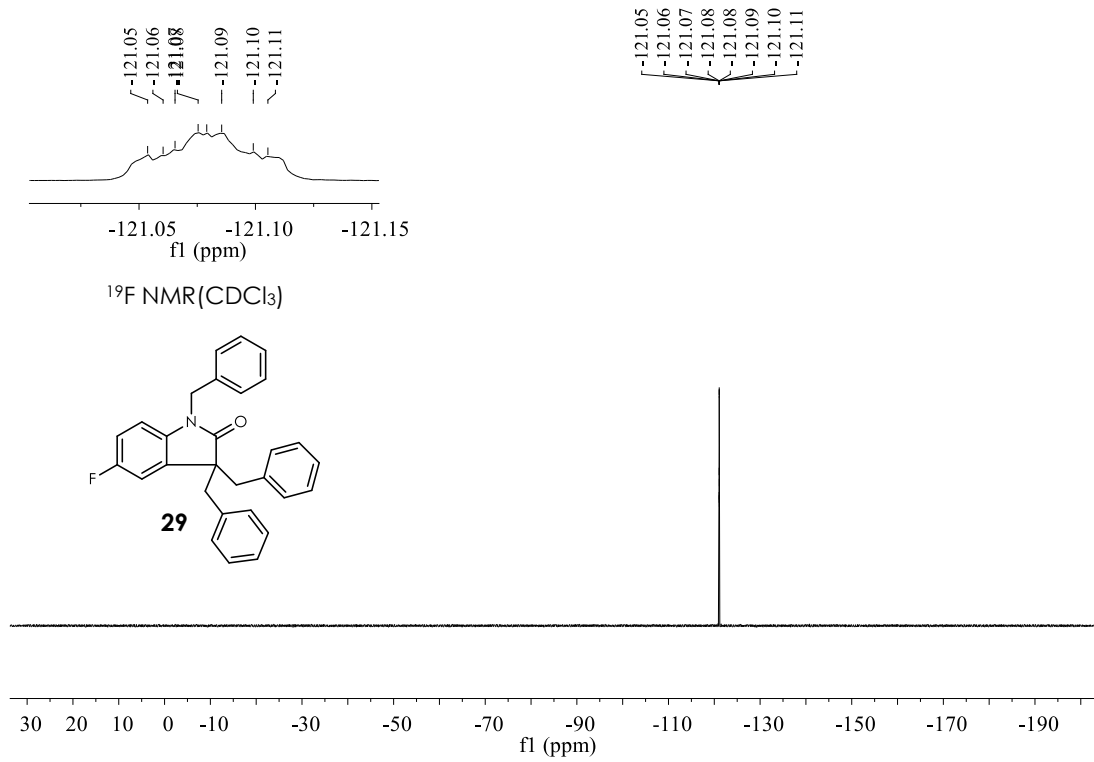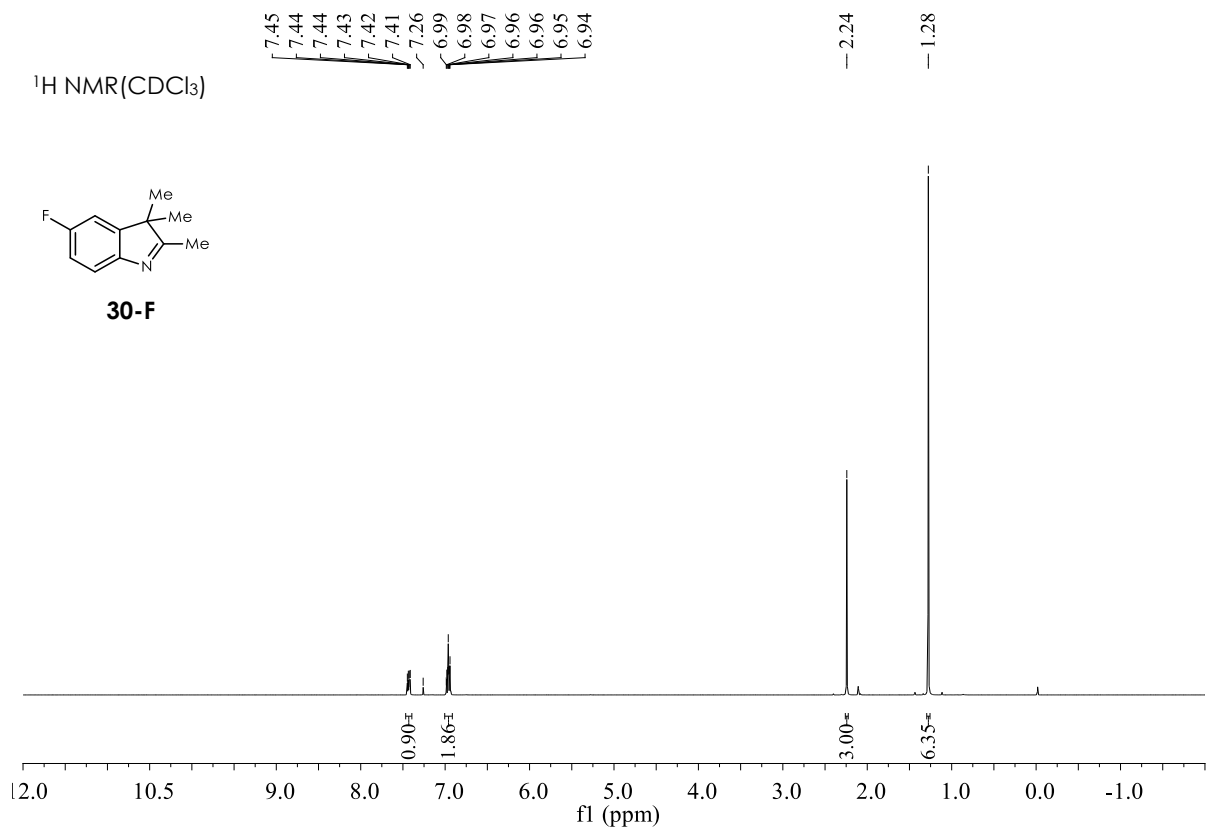

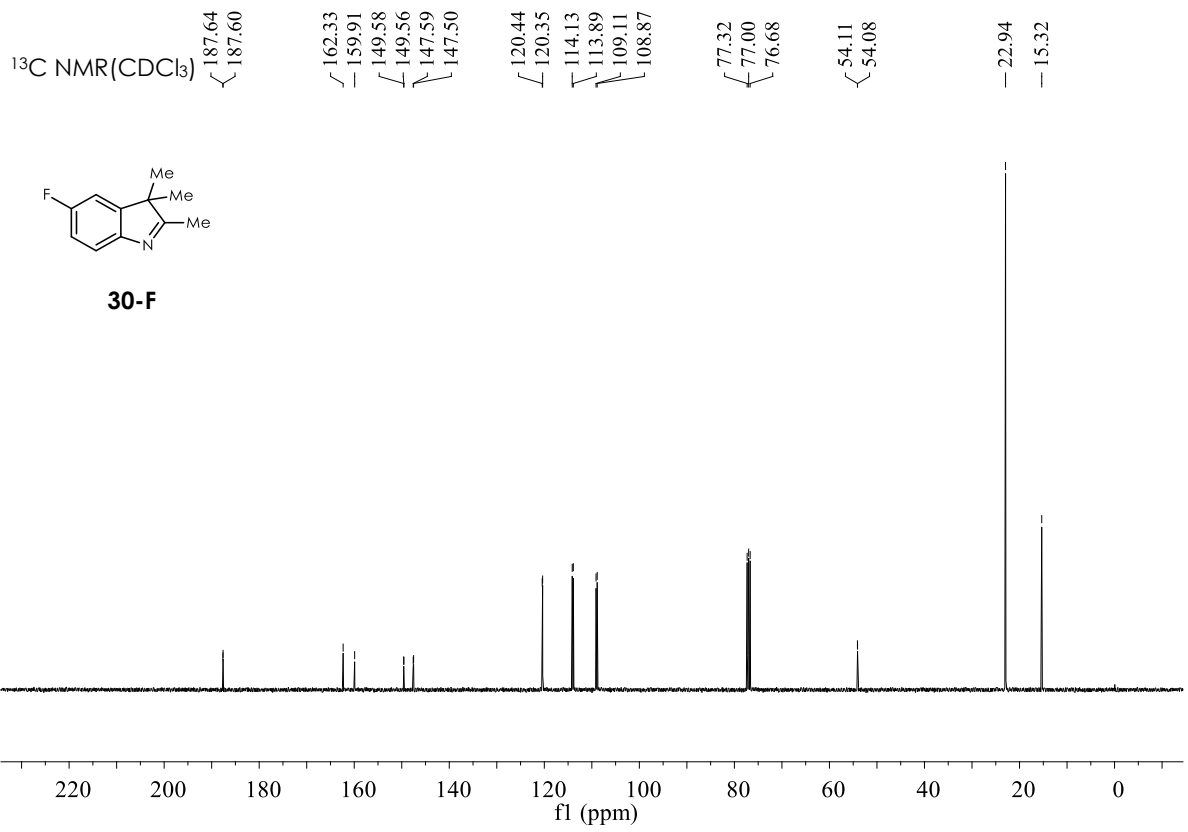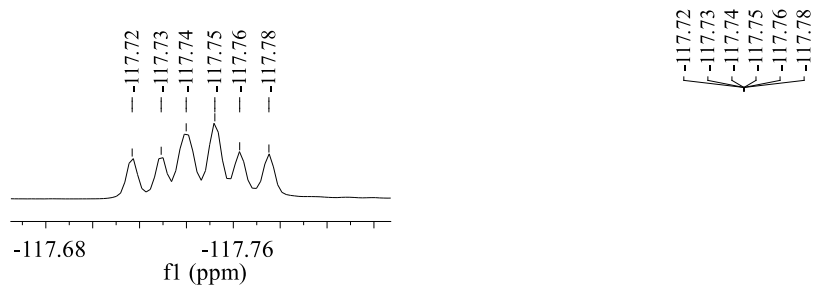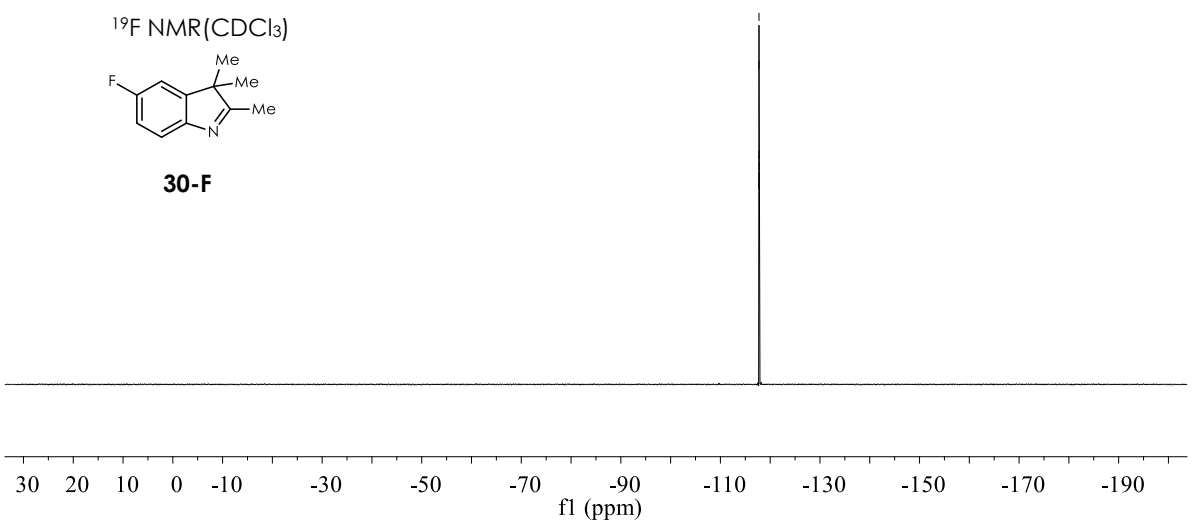



$^1\text{H NMR}(\text{CDCl}_3)$

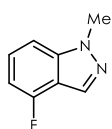

**31**

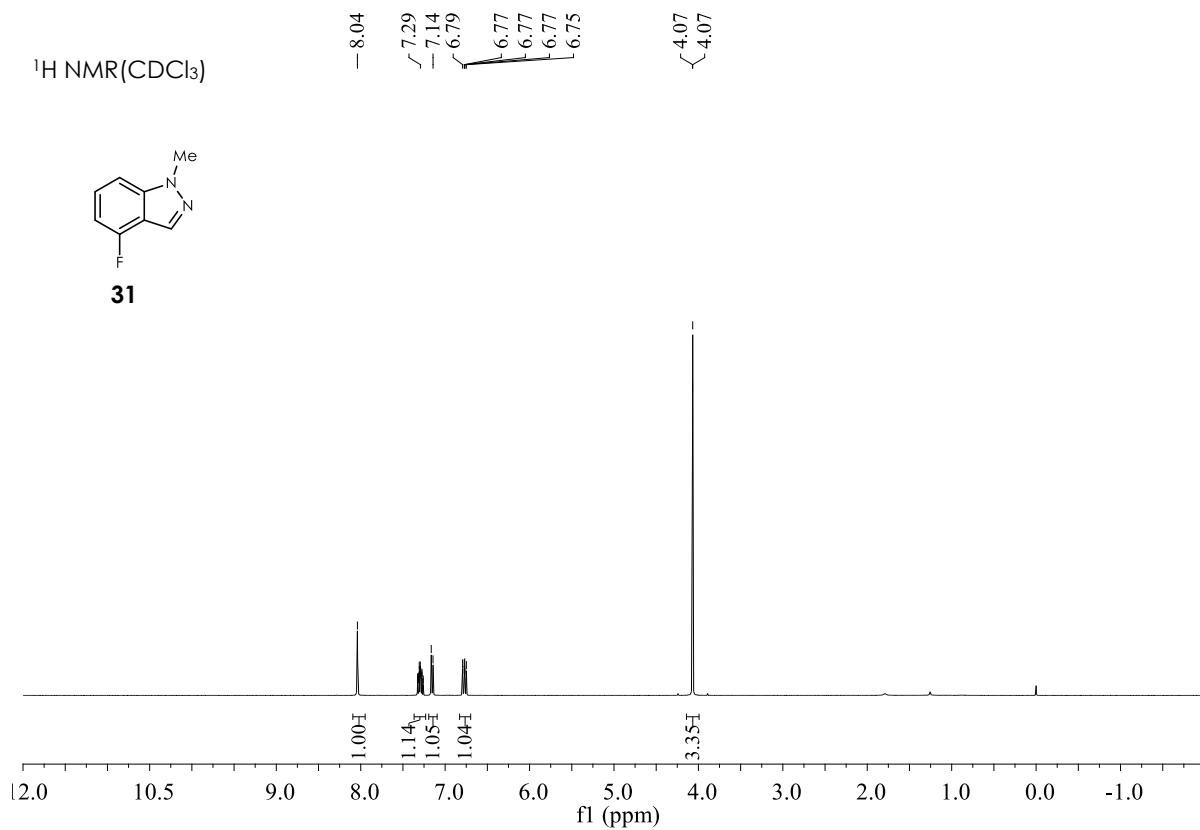

$^{13}\text{C NMR}(\text{CDCl}_3)$

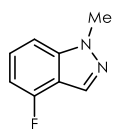

**31**

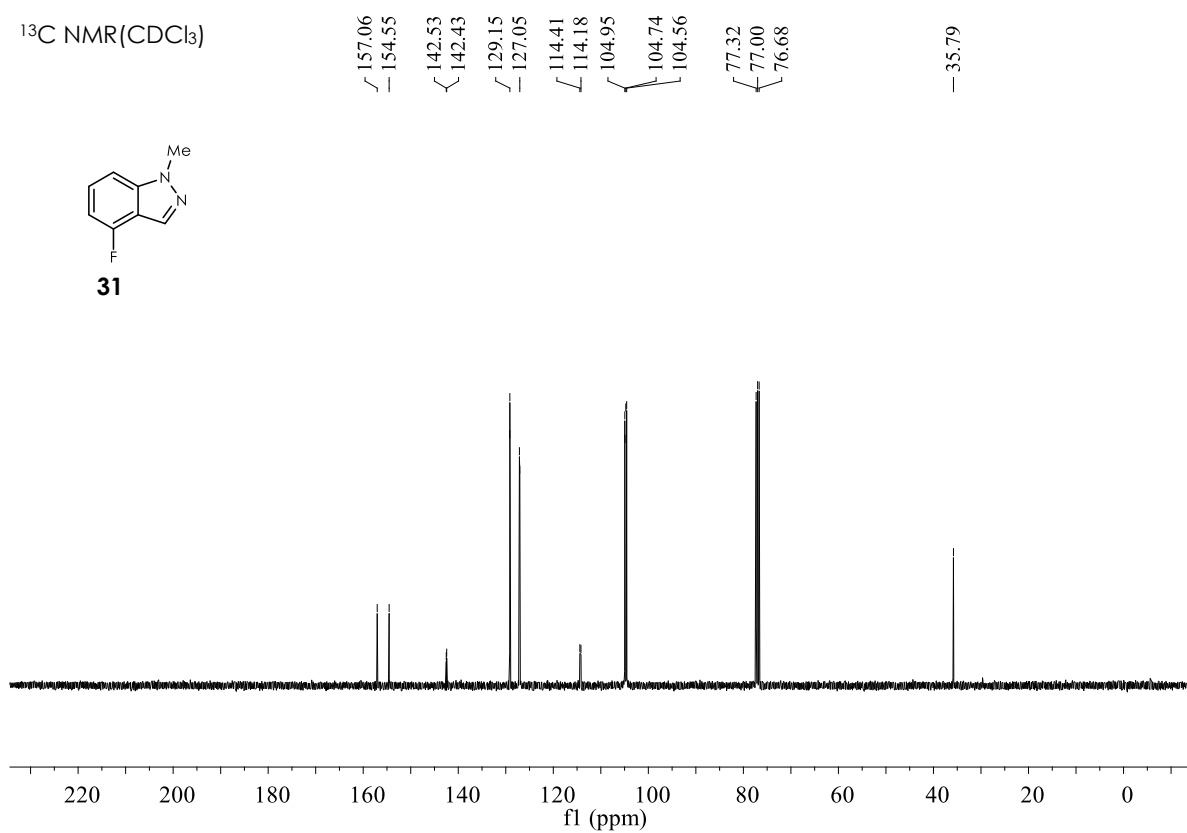

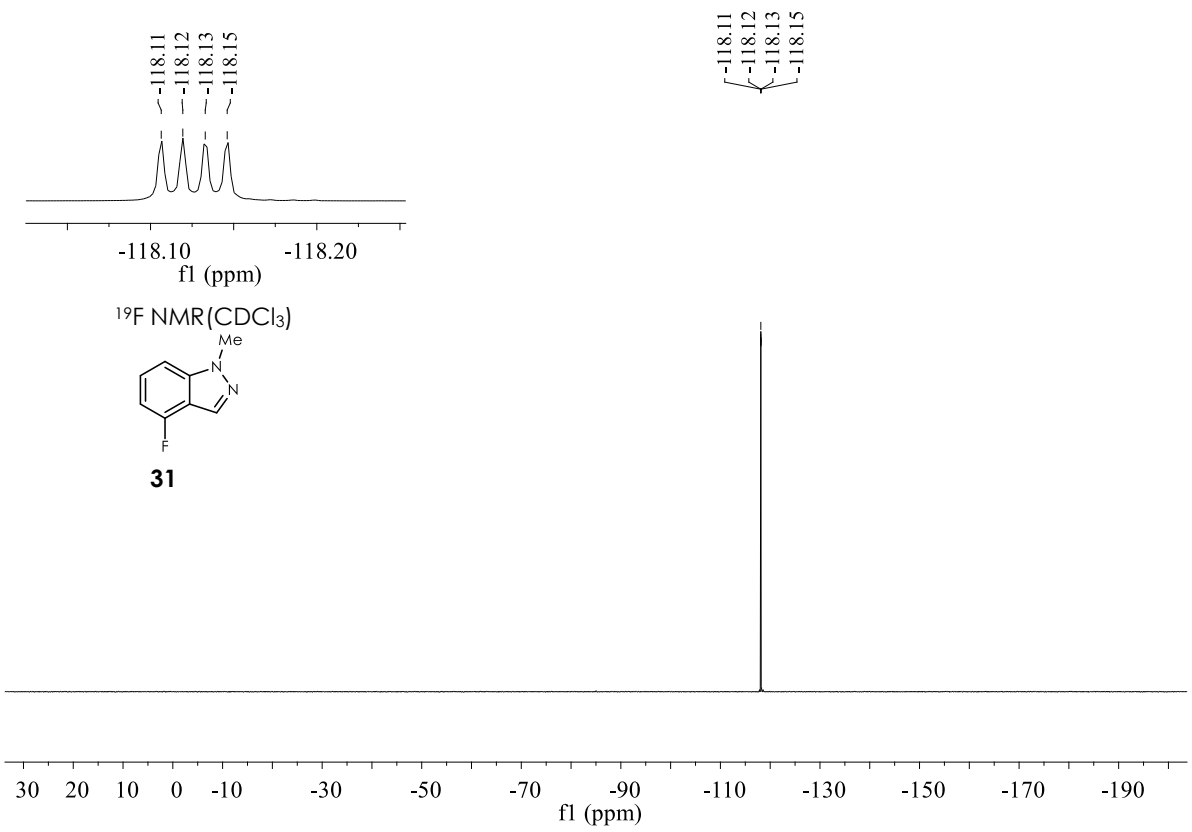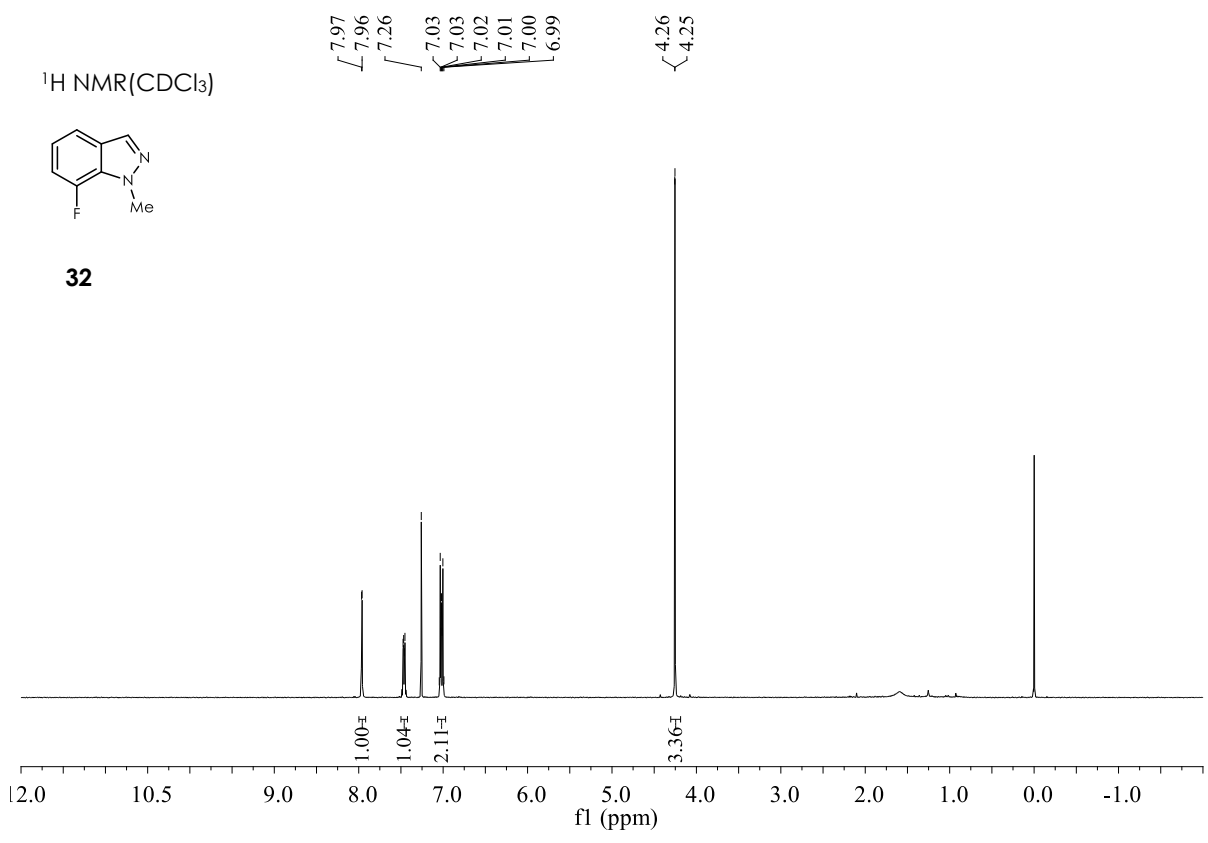

$^{13}\text{C}$  NMR ( $\text{CDCl}_3$ )

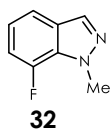

149.80  
147.34  
133.07  
129.38  
127.98  
116.67  
110.79  
110.62  
77.32  
77.00  
76.68  
38.22  
38.18

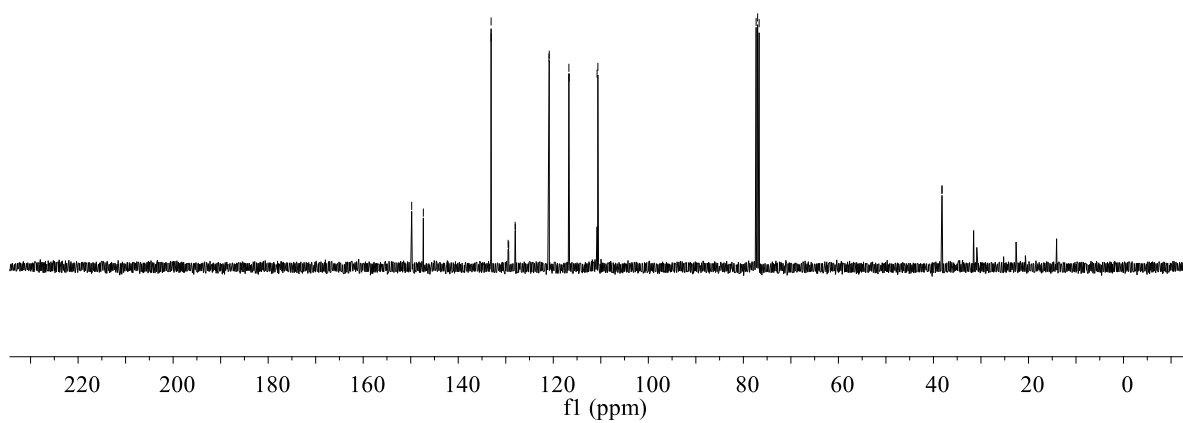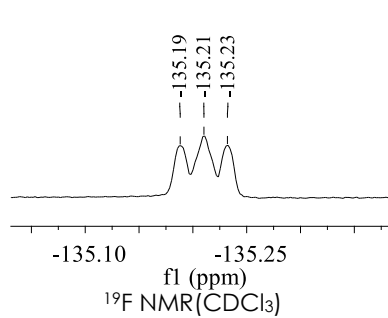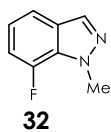

-135.19  
-135.21  
-135.23

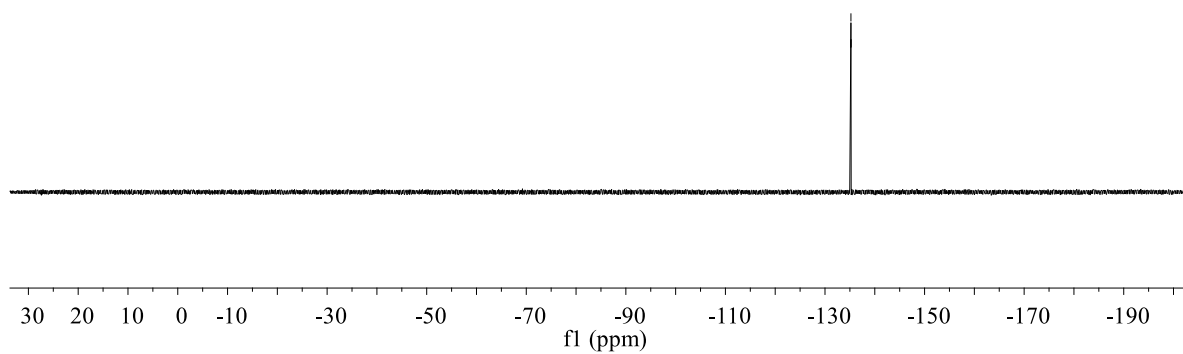

<sup>1</sup>H NMR(CDCl<sub>3</sub>)

7.91, 7.90, 7.89, 7.88, 7.37, 7.36, 7.26, 7.15, 7.13, 4.11, 4.09, 4.08, 4.07, 4.06, 4.05, 4.04, 1.71, 1.43, 1.39, 1.36, 1.33, 1.30, 0.91, 0.90, 0.88, 0.86

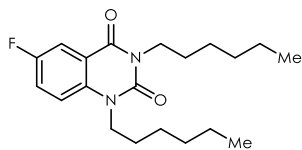

**34**

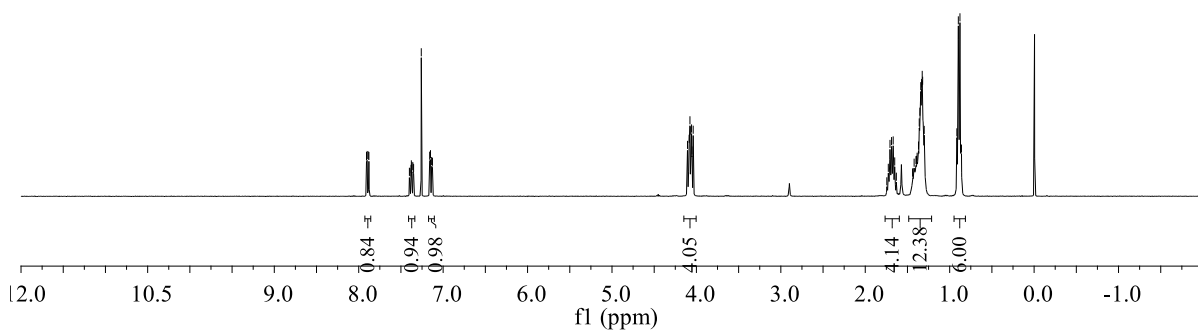

<sup>13</sup>C NMR(CDCl<sub>3</sub>)

160.80, 160.77, 159.24, 156.81, 150.34, 136.21, 136.19, 122.63, 122.40, 115.40, 115.33, 114.61, 114.38, 77.32, 77.00, 76.68, 44.03, 42.13, 31.46, 26.42, 22.52, 14.00, 13.95

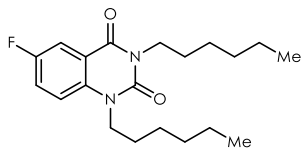

**34**

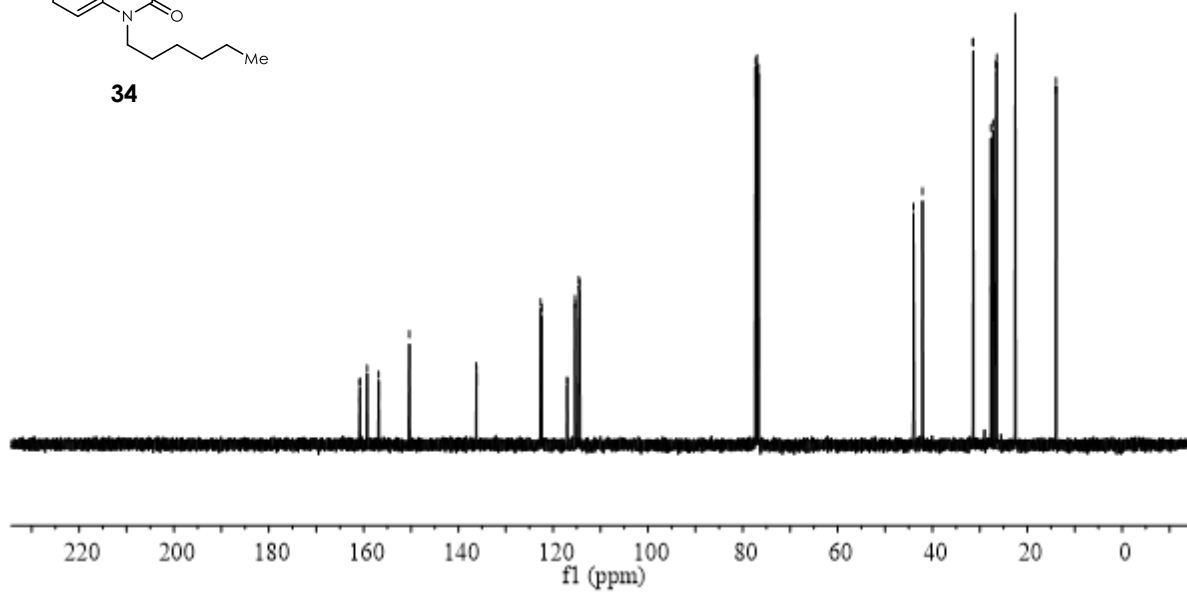

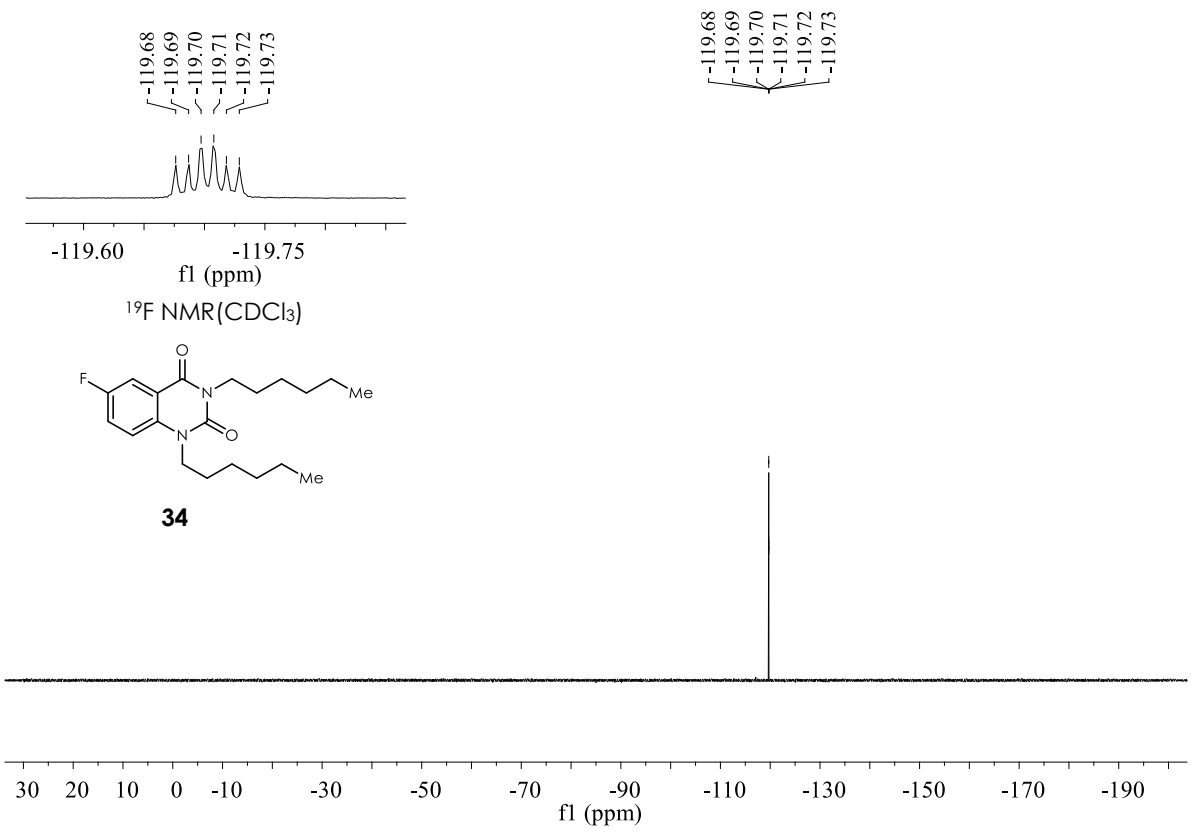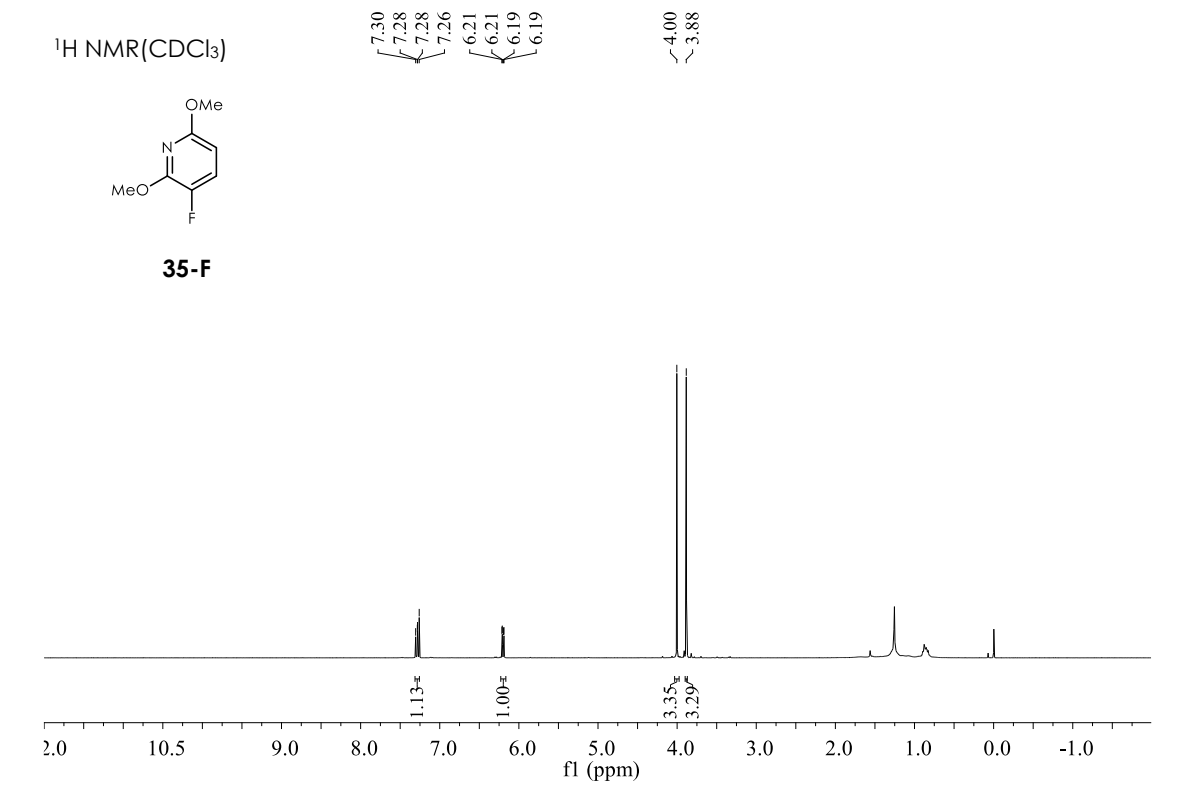

$^{13}\text{C}$  NMR( $\text{CDCl}_3$ )

— 157.70  
— 150.58  
— 143.17  
— 140.74  
— 126.58  
— 126.41  
— 99.94  
— 99.92  
— 77.32  
— 77.00  
— 76.68  
— 53.92  
— 53.59

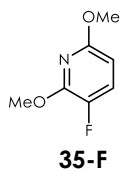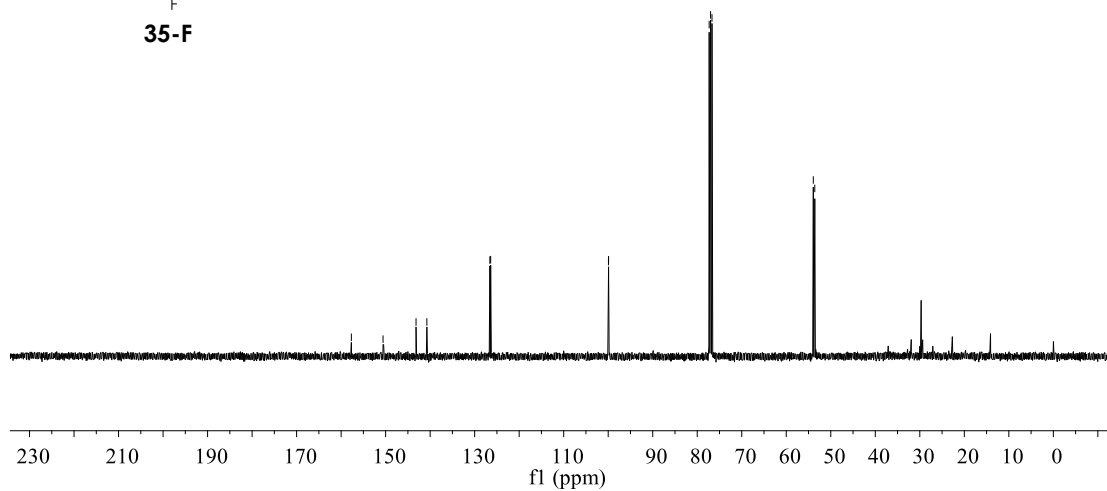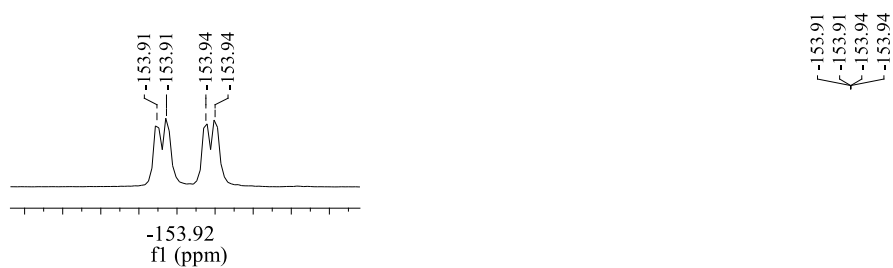

$^{19}\text{F}$  NMR( $\text{CDCl}_3$ )

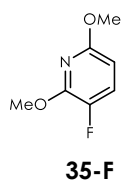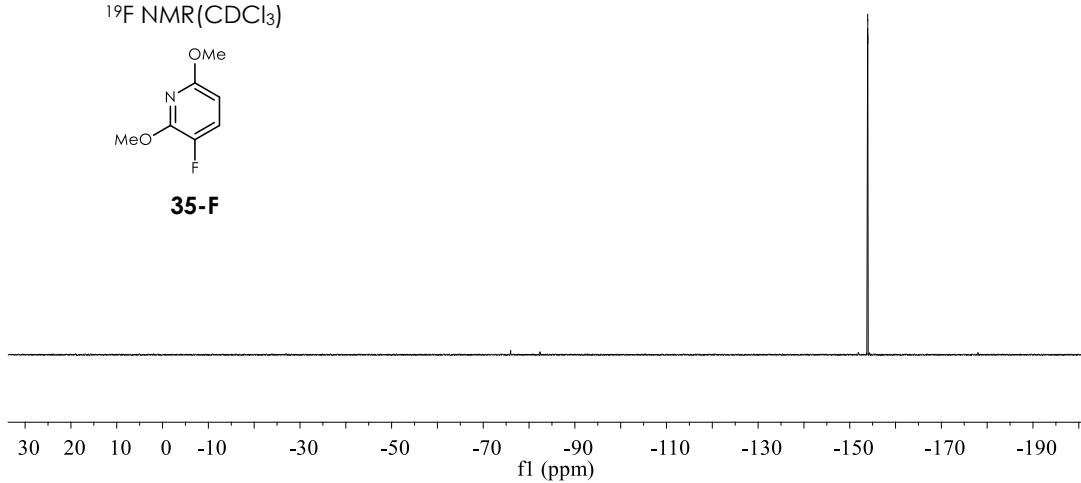

<sup>1</sup>H NMR(CDCl<sub>3</sub>)

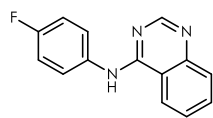

**37-i**

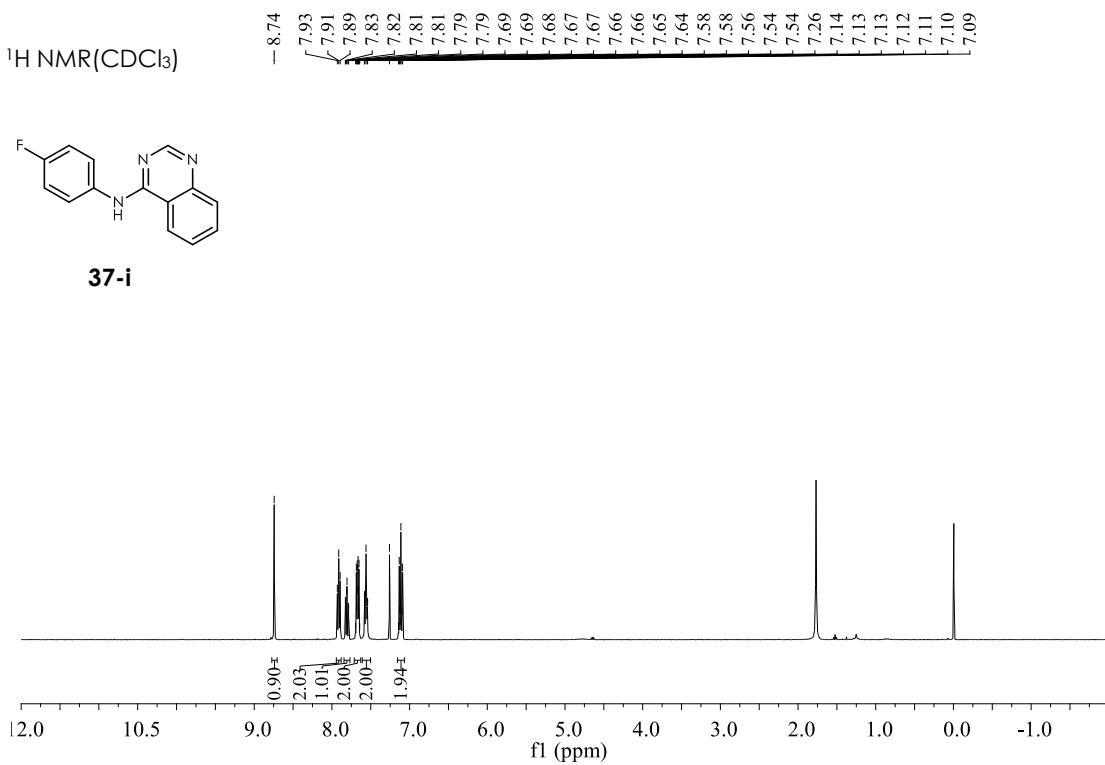

<sup>13</sup>C NMR(CDCl<sub>3</sub>)

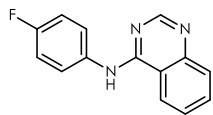

**37-i**

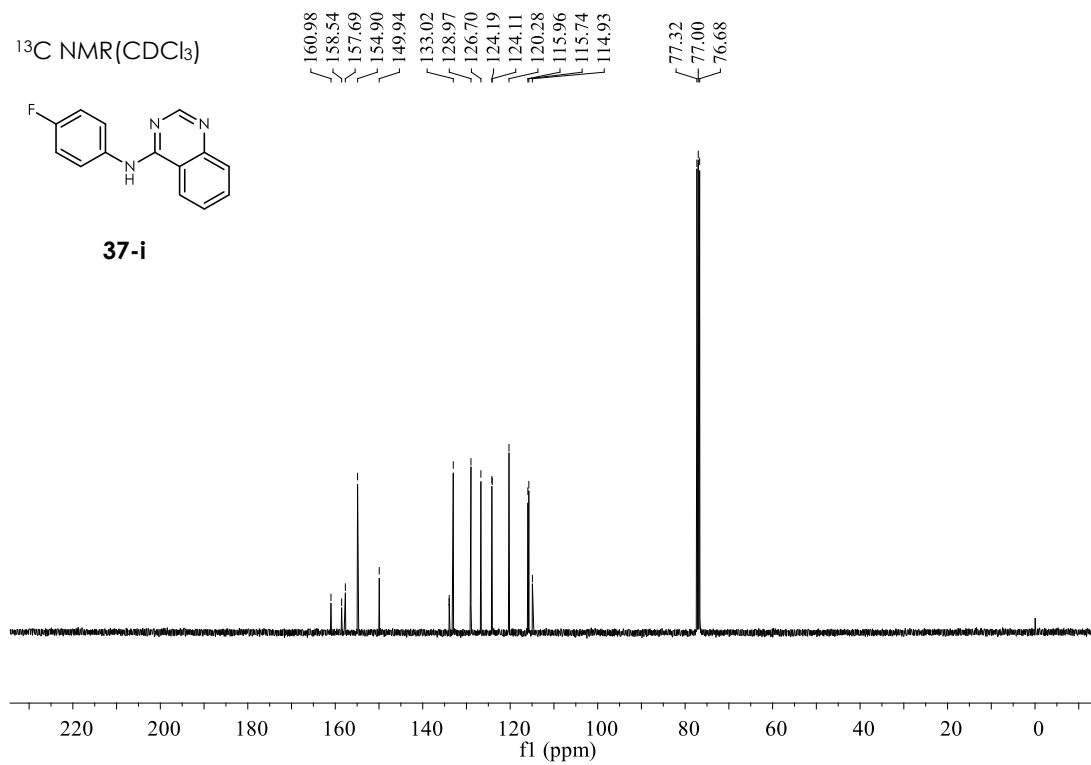

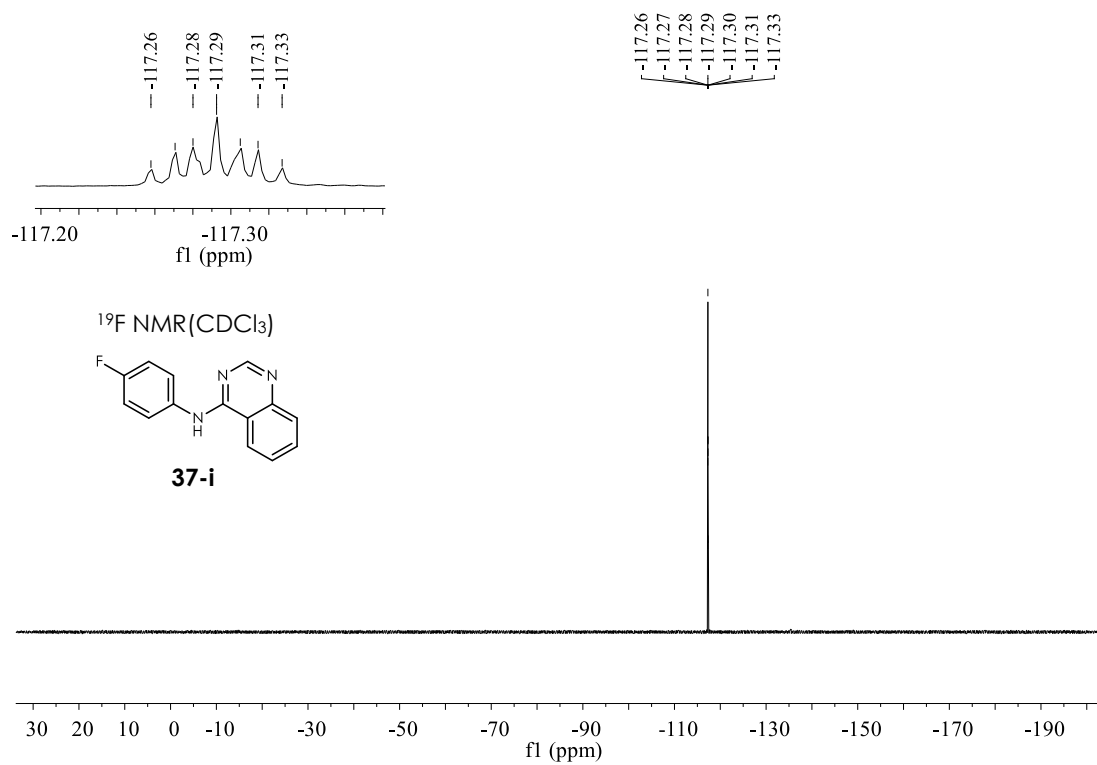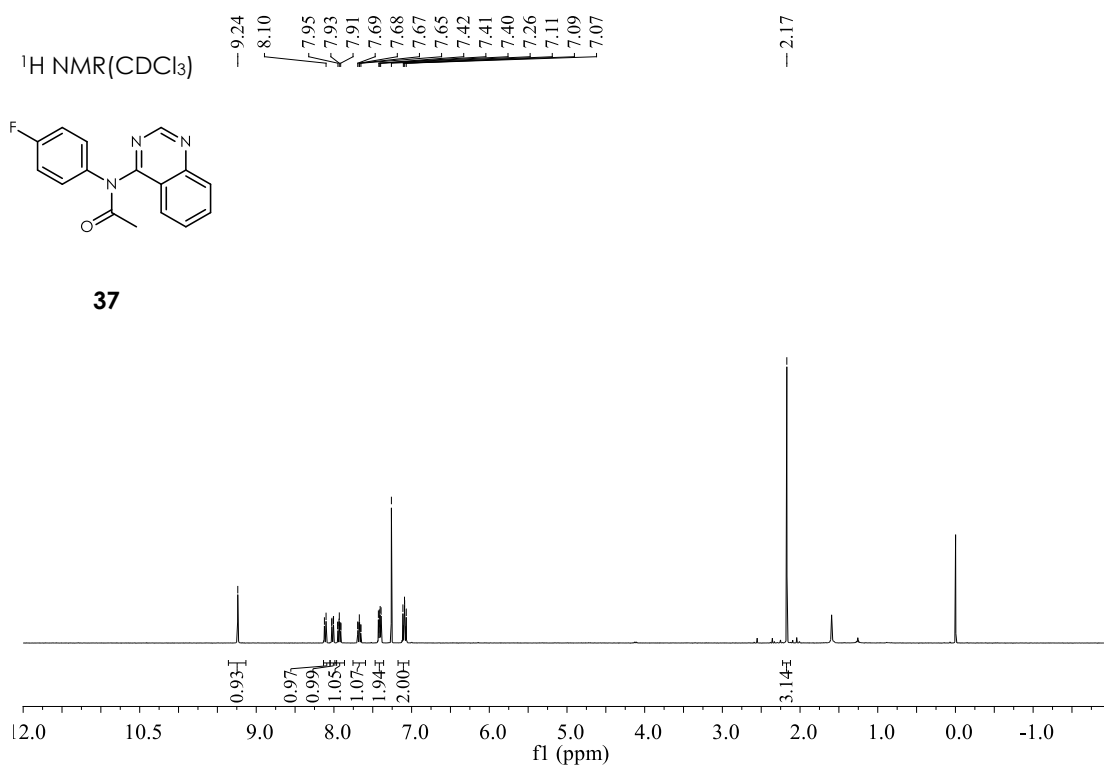



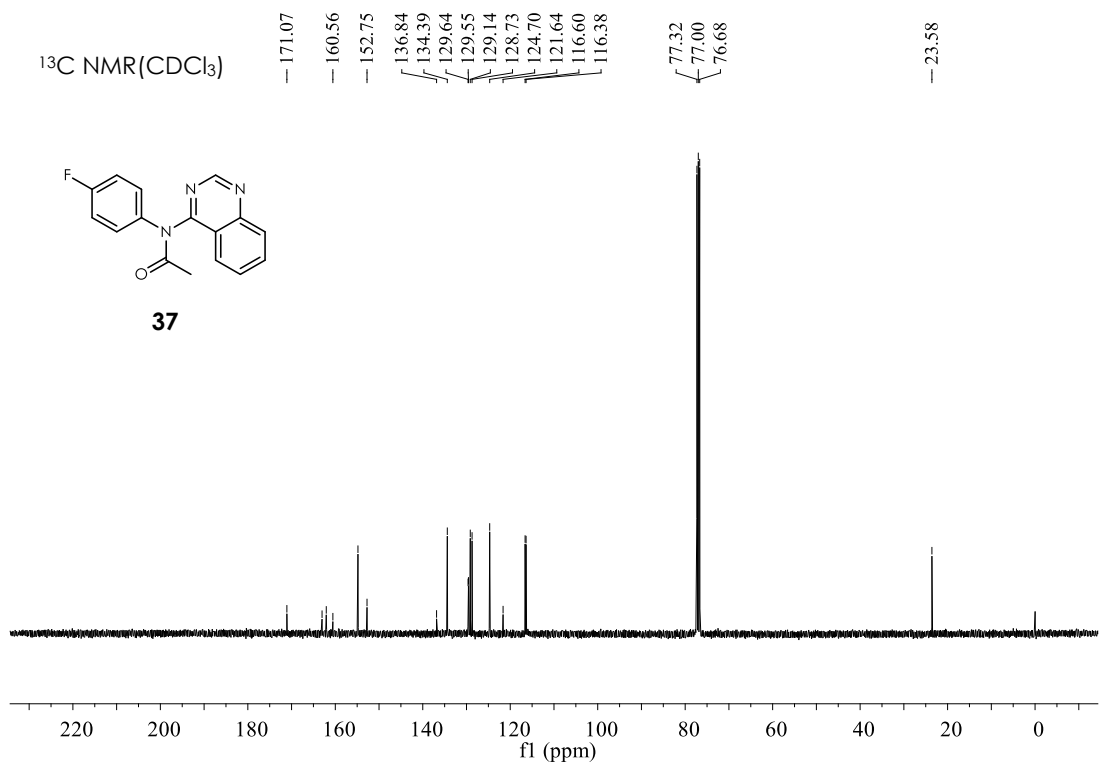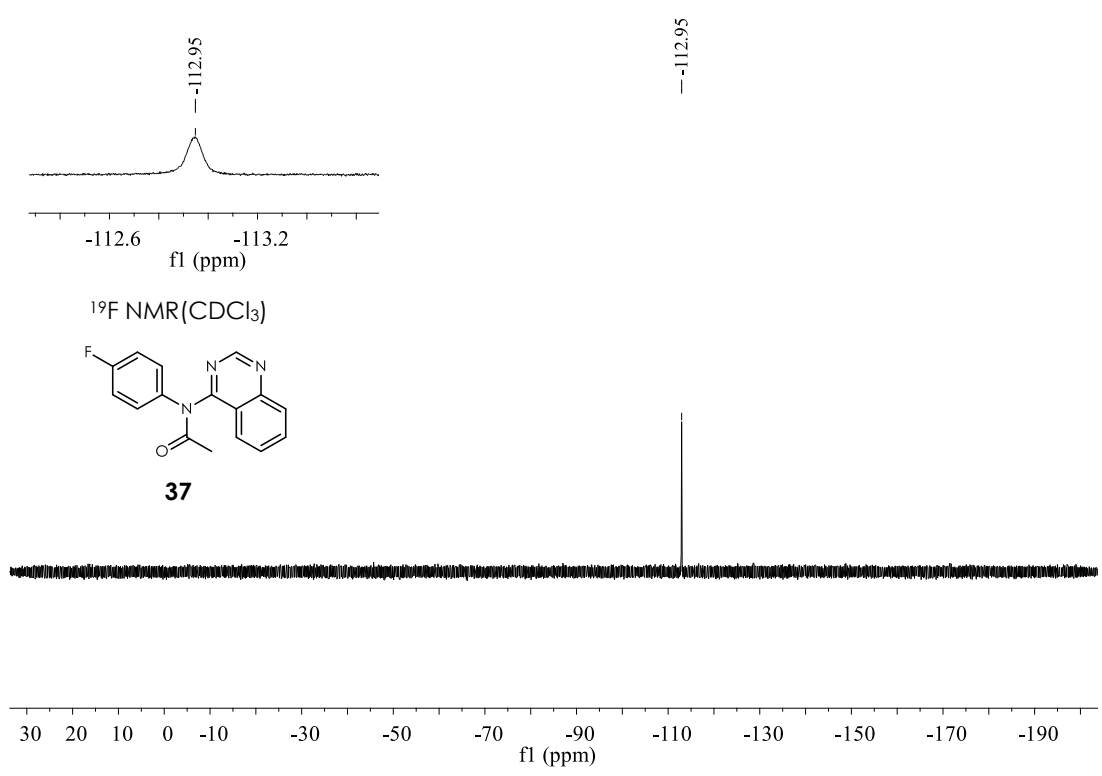

<sup>1</sup>H NMR(CDCl<sub>3</sub>)

8.77  
8.36  
7.91  
7.66  
7.26  
7.25  
7.25  
7.24  
7.24  
7.23  
7.23  
7.22  
7.20  
7.20  
7.19  
7.18  
7.18  
7.17  
7.16  
7.15  
7.14

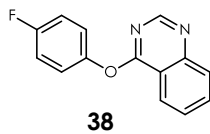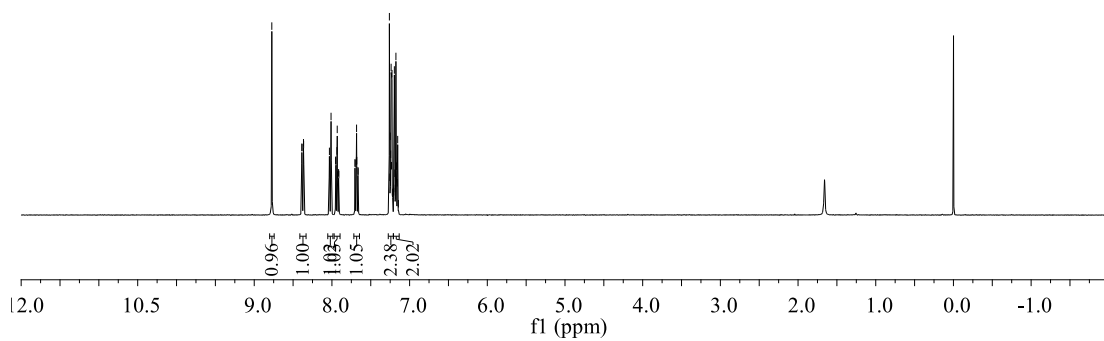

<sup>13</sup>C NMR(CDCl<sub>3</sub>)

166.94  
154.10  
151.68  
148.08  
148.05  
134.20  
123.28  
116.59  
116.36  
116.31  
77.31  
77.00  
76.68

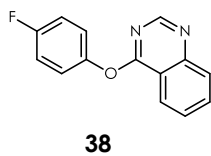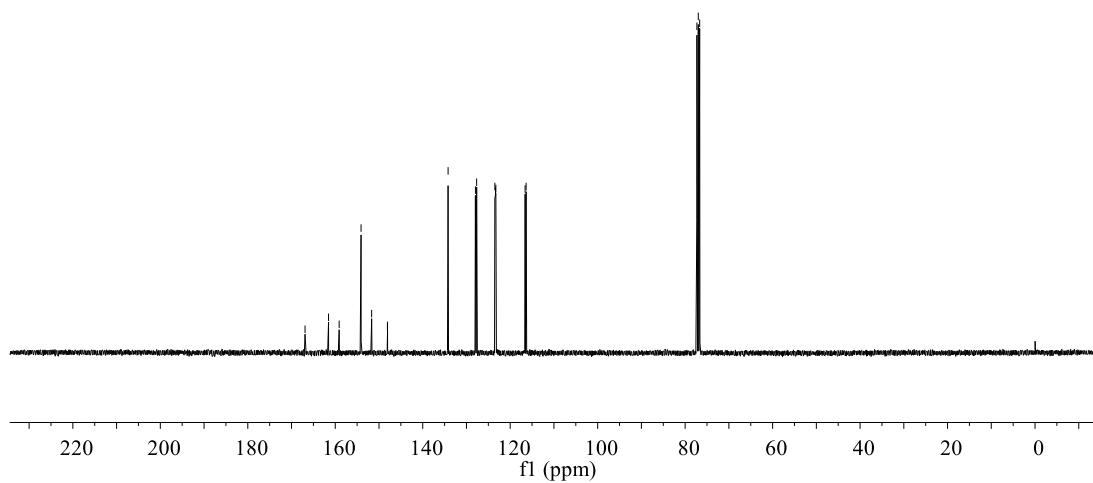

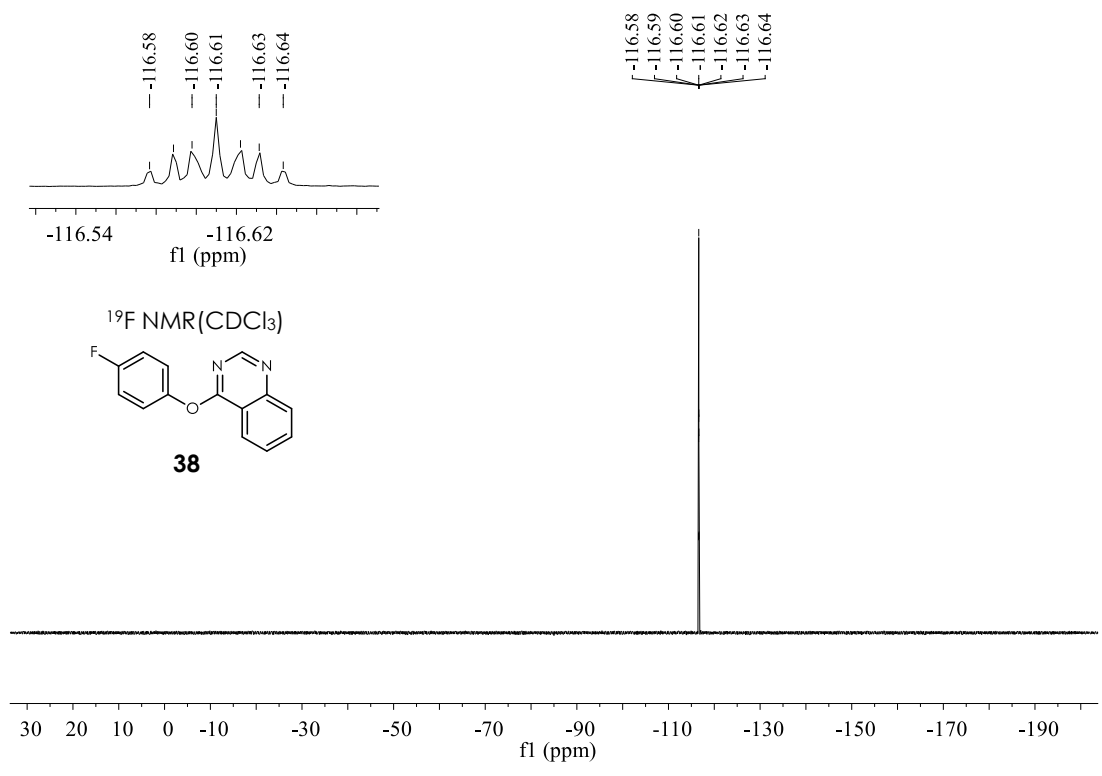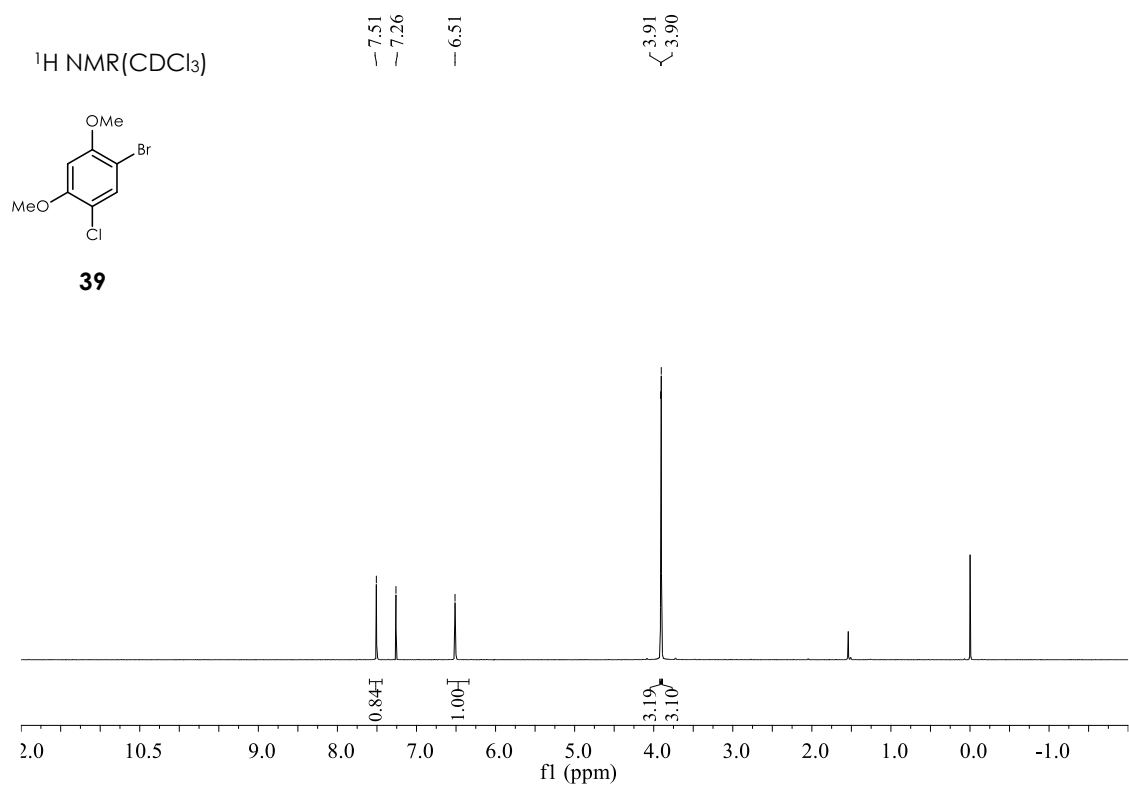

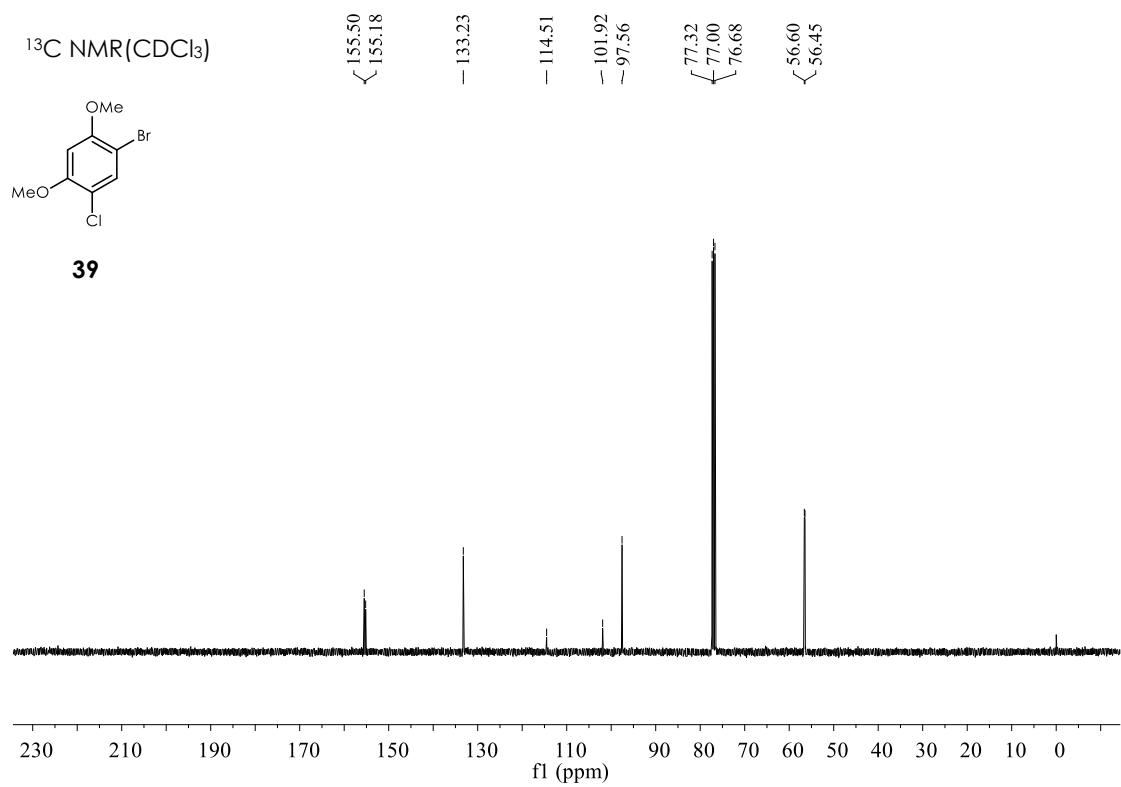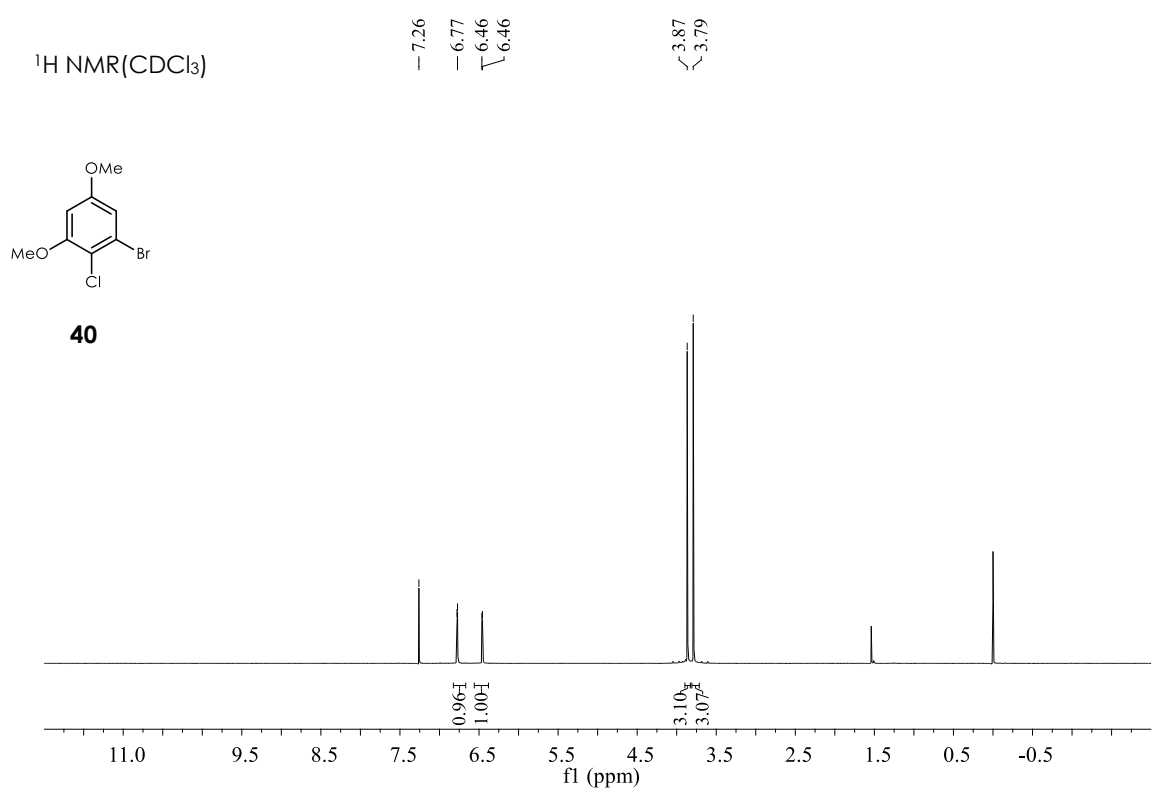

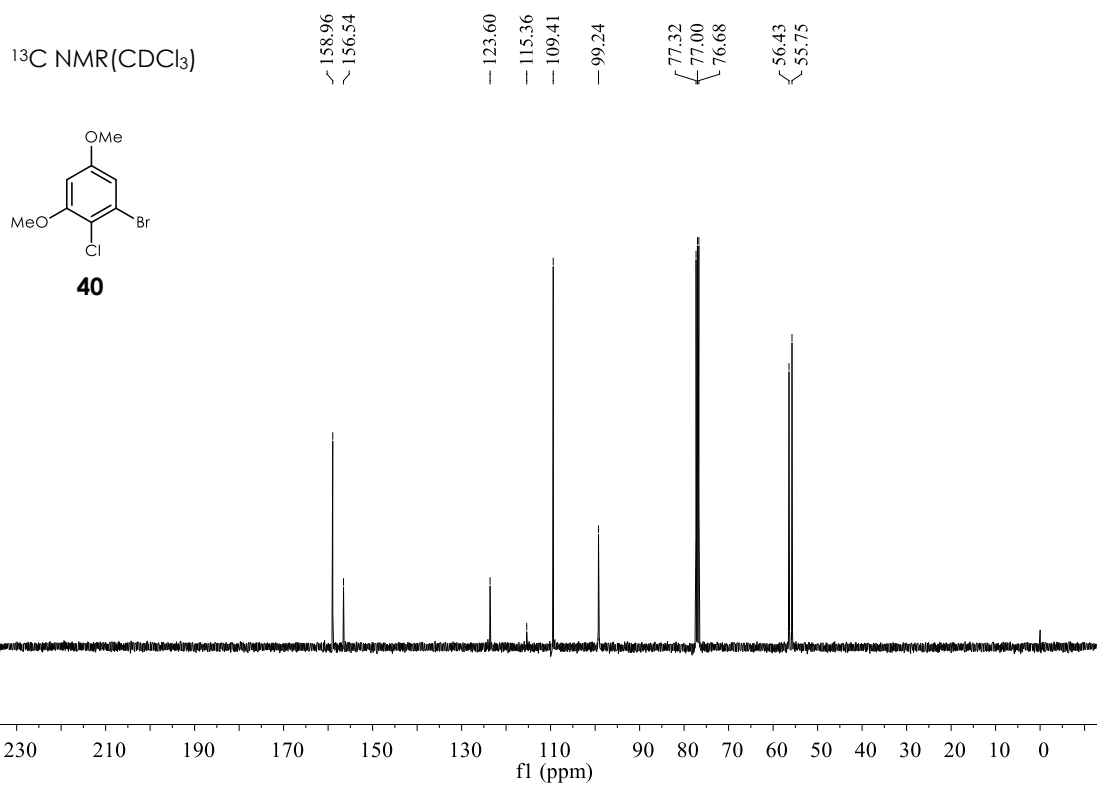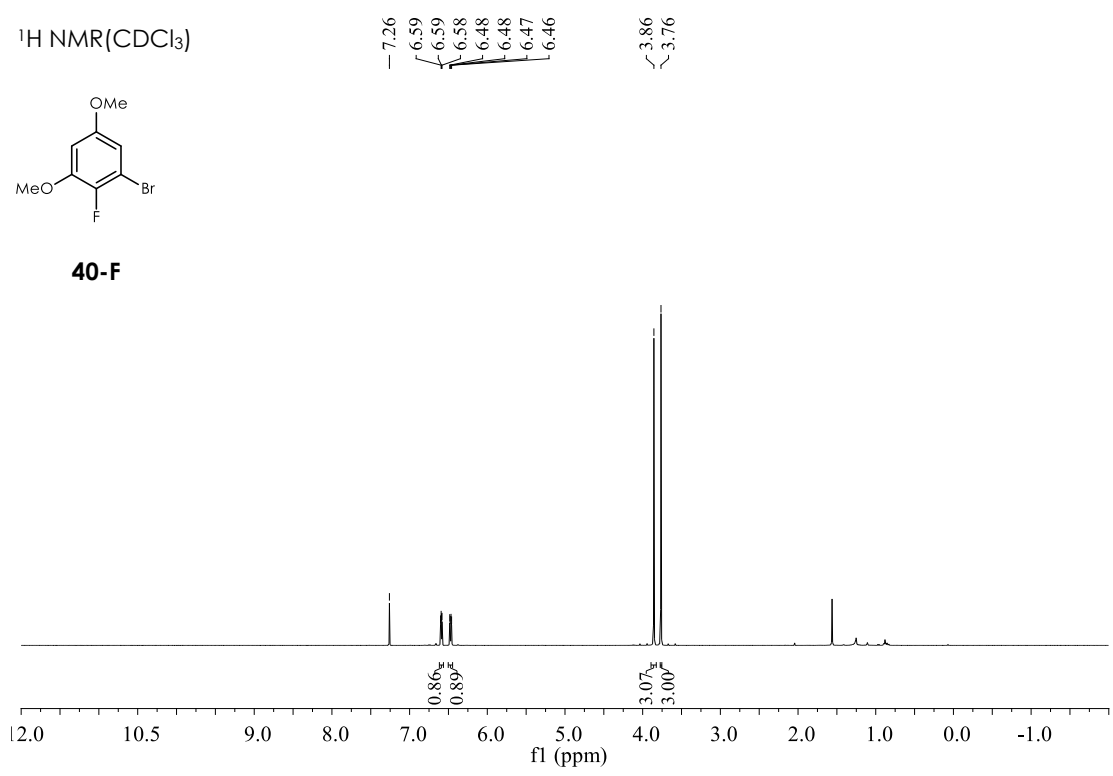

$^{13}\text{C}$  NMR( $\text{CDCl}_3$ )

155.88  
155.85  
148.92  
148.79  
145.82  
143.44  
109.33  
109.14  
107.54  
107.53  
100.64  
100.63  
77.32  
77.00  
76.68  
56.42  
55.87

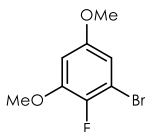

**40-F**

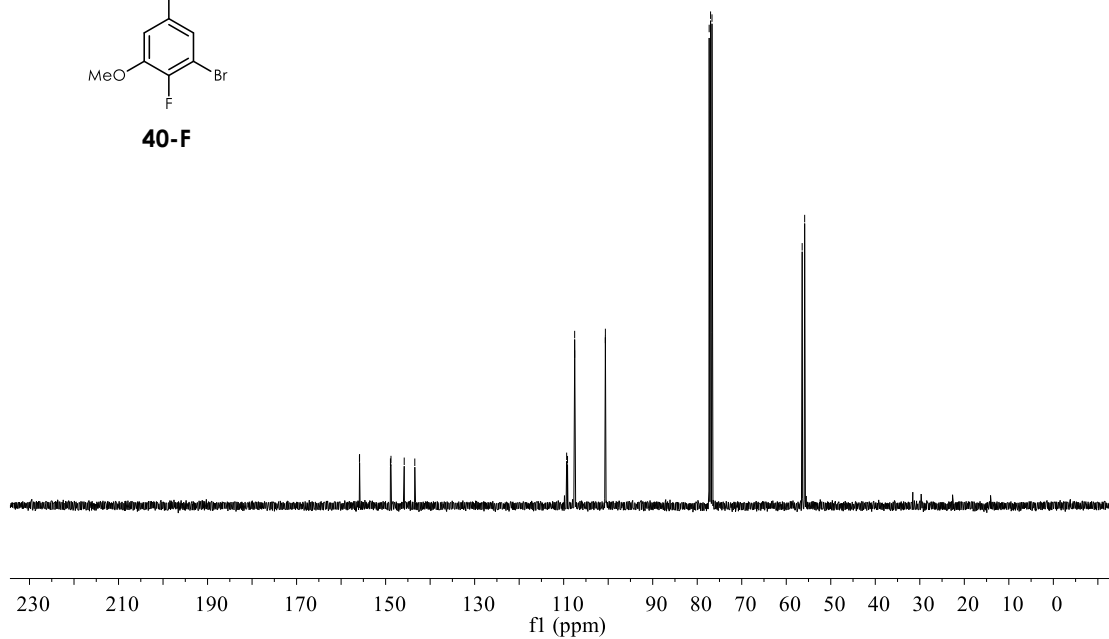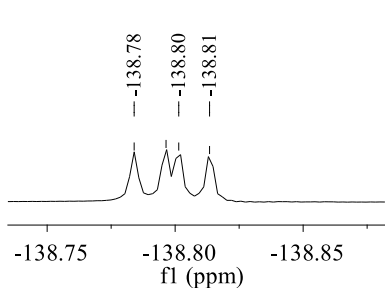

$^{19}\text{F}$  NMR( $\text{CDCl}_3$ )

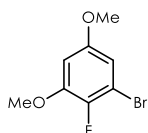

**40-F**

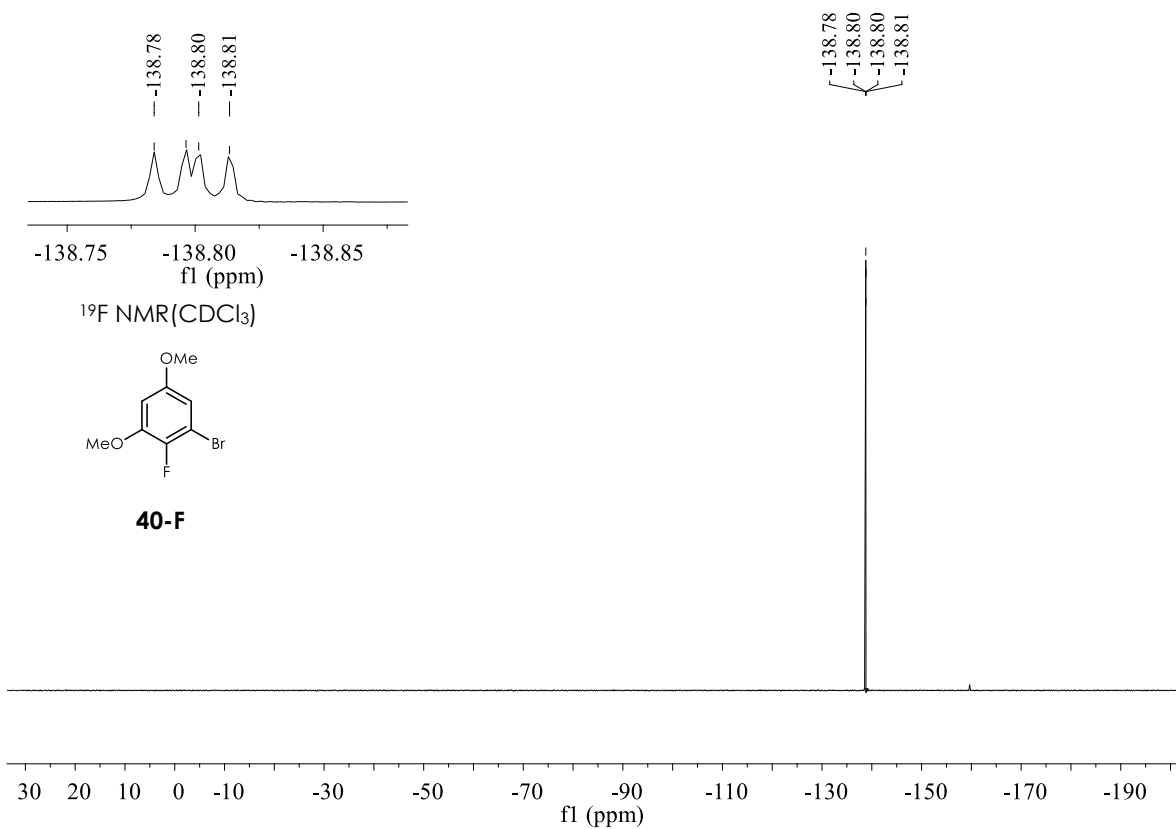

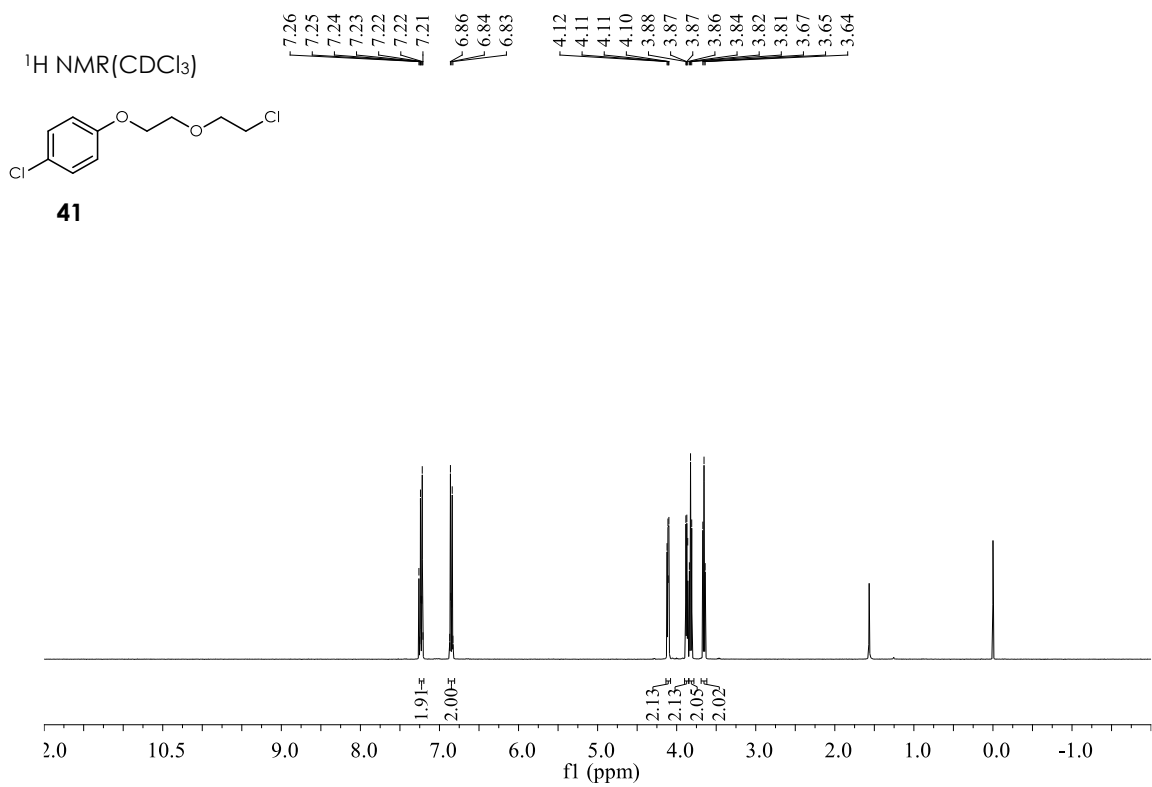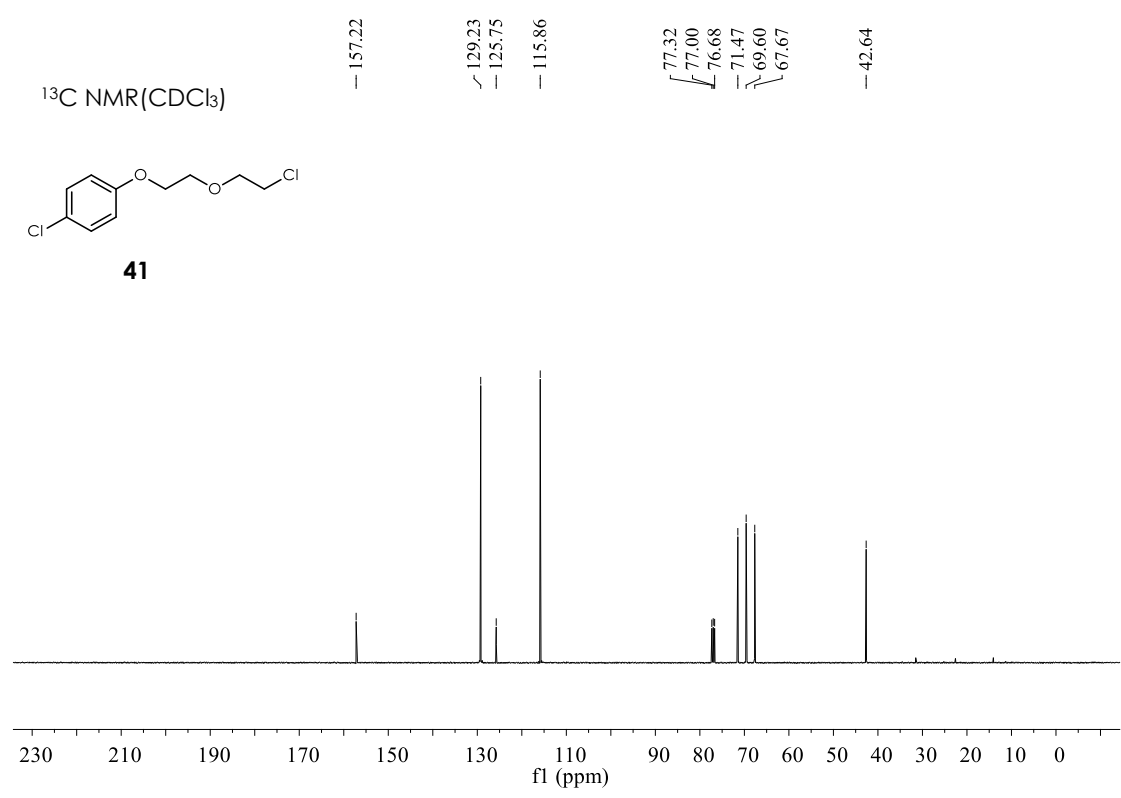

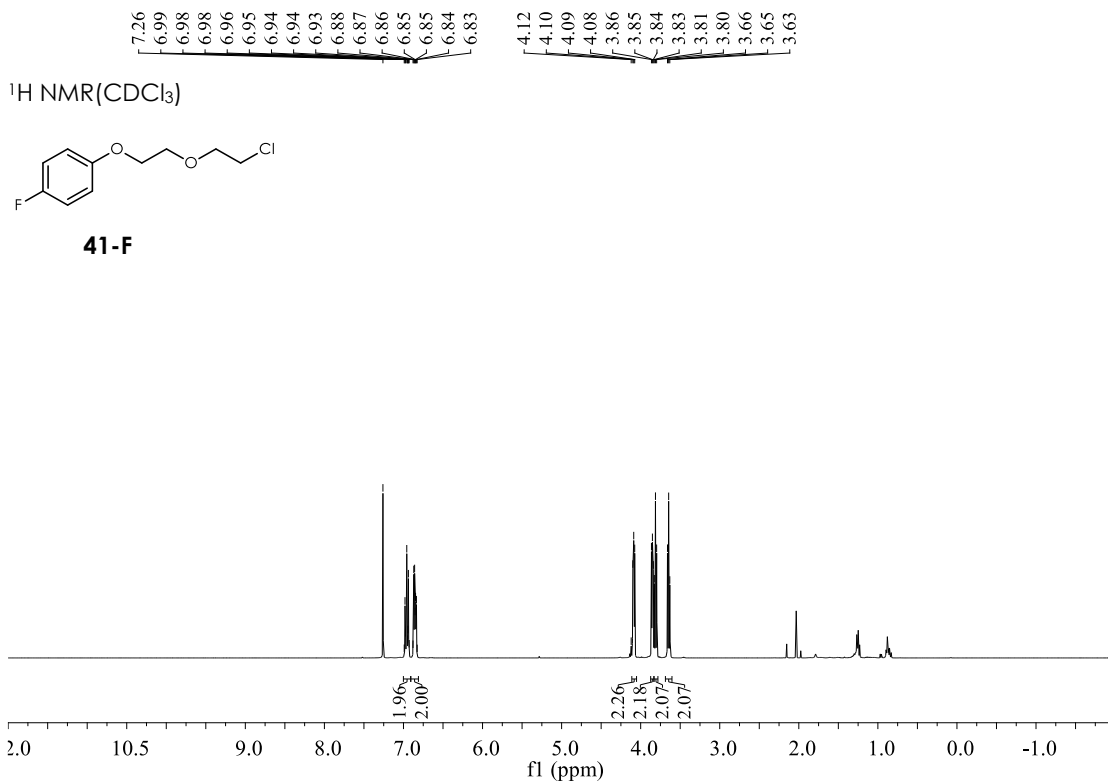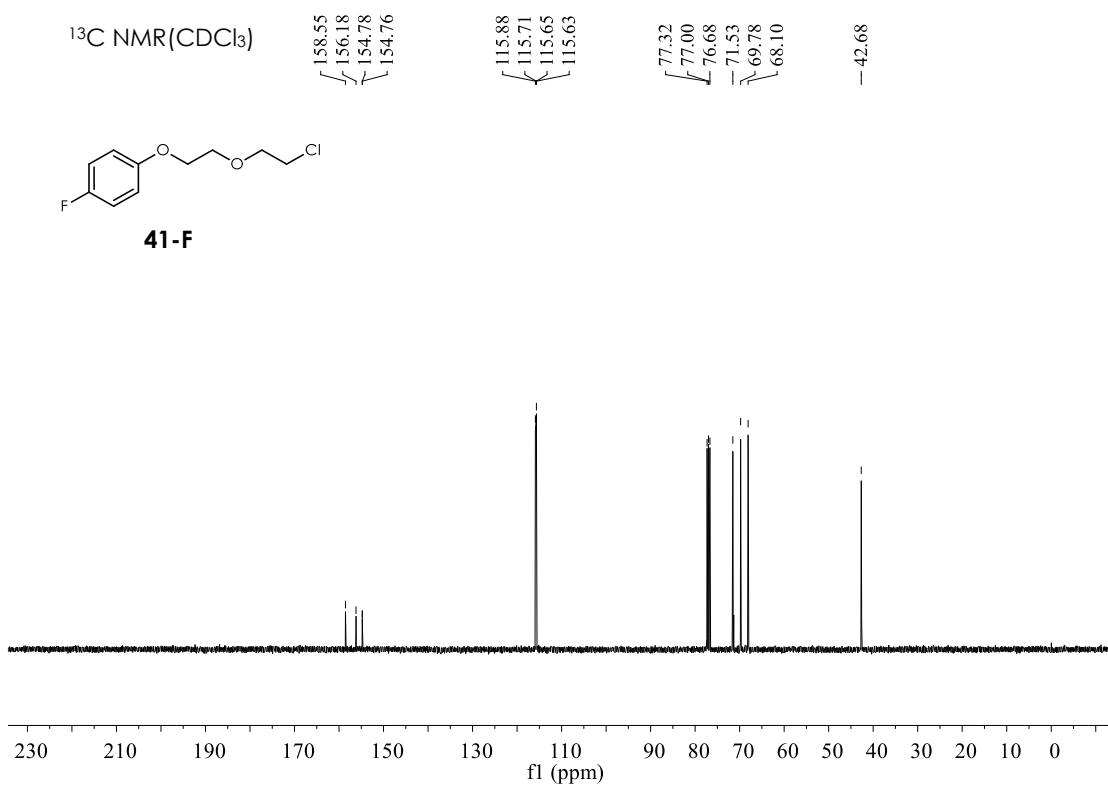



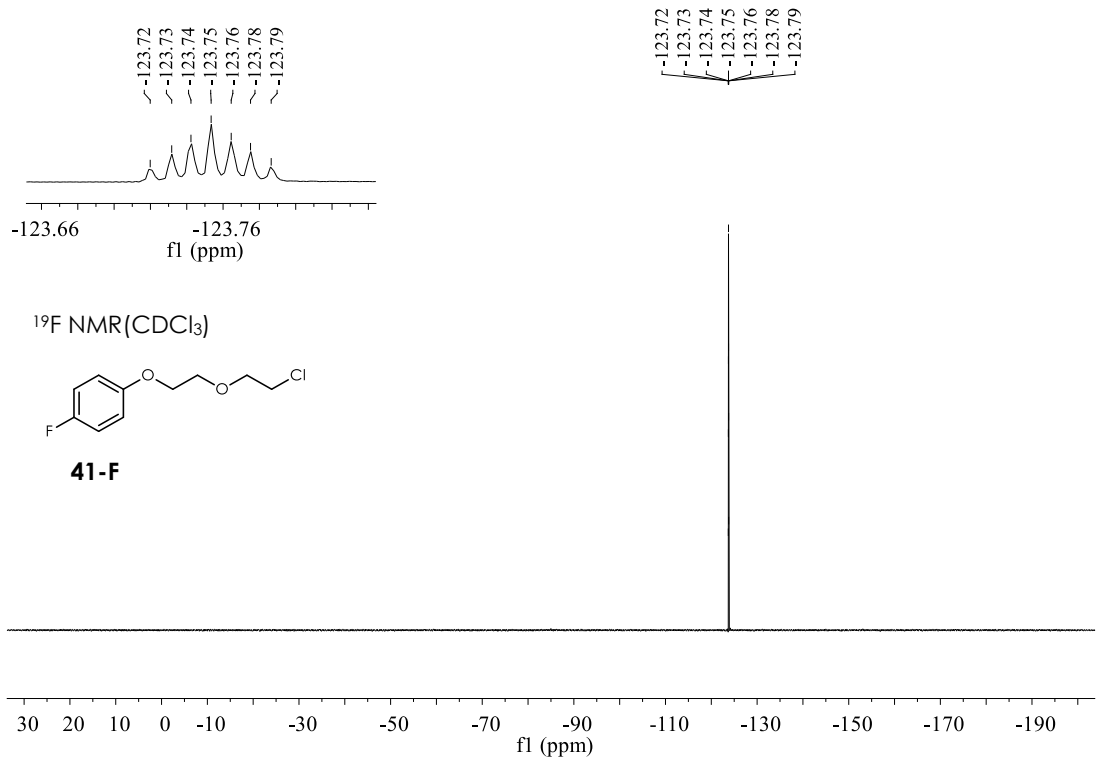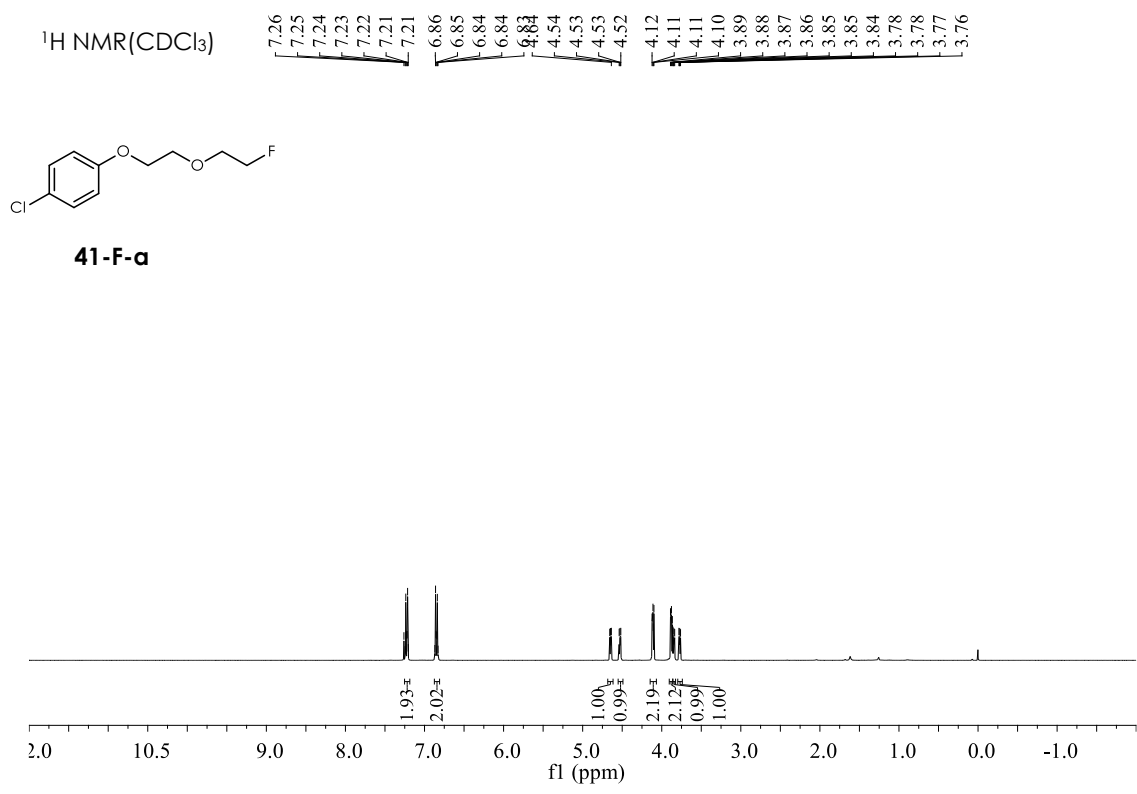

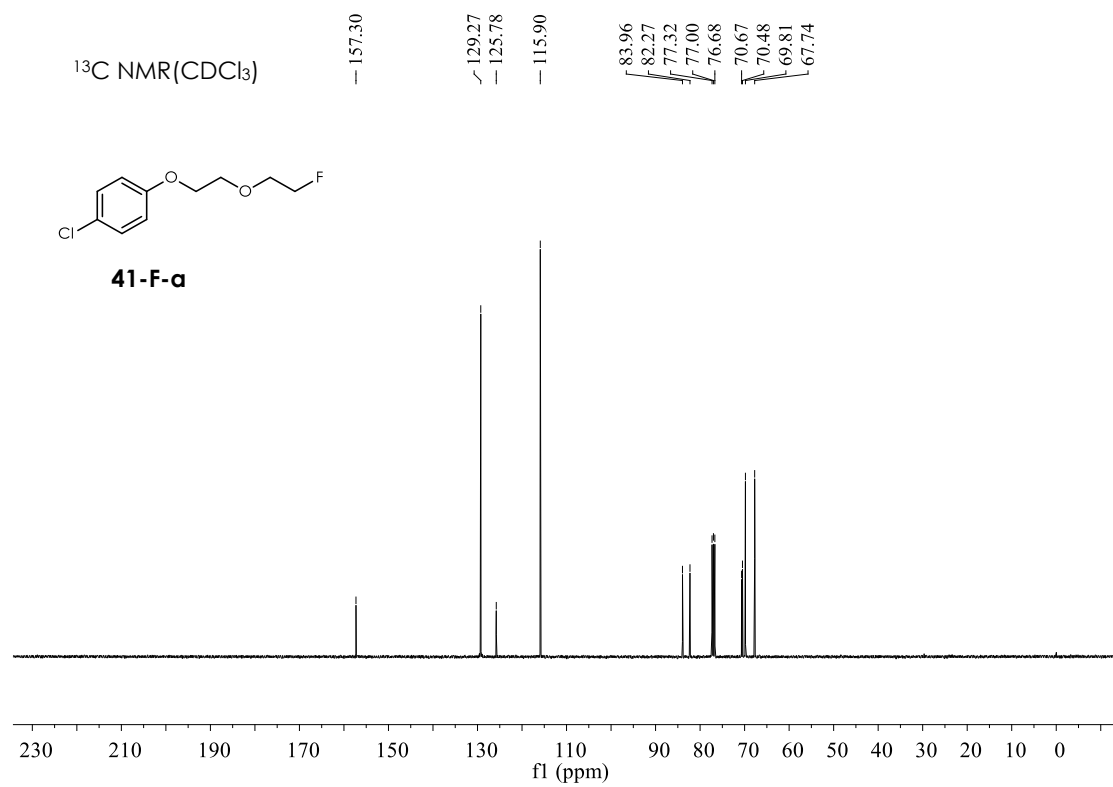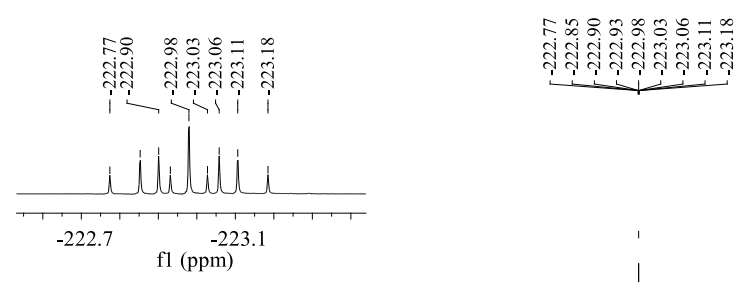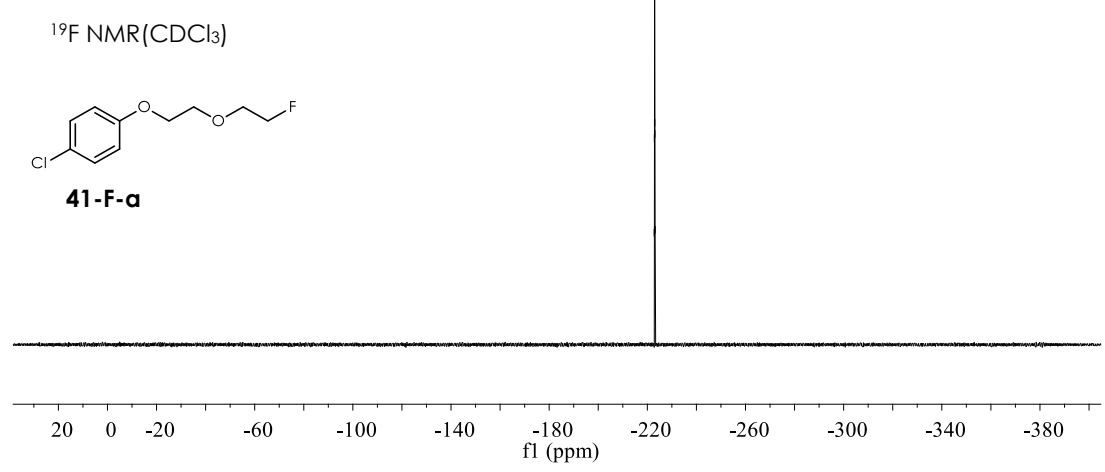

$^1\text{H NMR}(\text{CDCl}_3)$

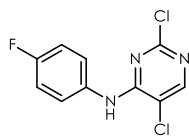

**42-i**

8.38  
7.55  
7.26  
7.20  
7.12  
7.10  
7.08

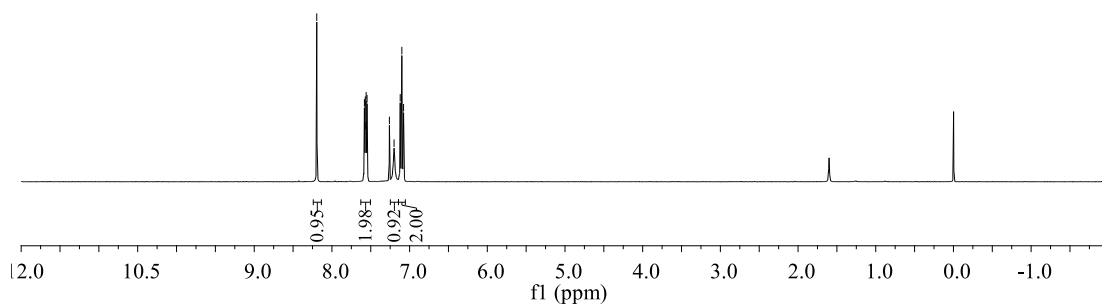

$^{13}\text{C NMR}(\text{CDCl}_3)$

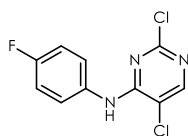

**42-i**

161.17  
158.73  
158.26  
156.47  
154.64  
132.68  
132.65  
123.25  
116.07  
115.85  
113.57  
77.32  
77.00  
76.68

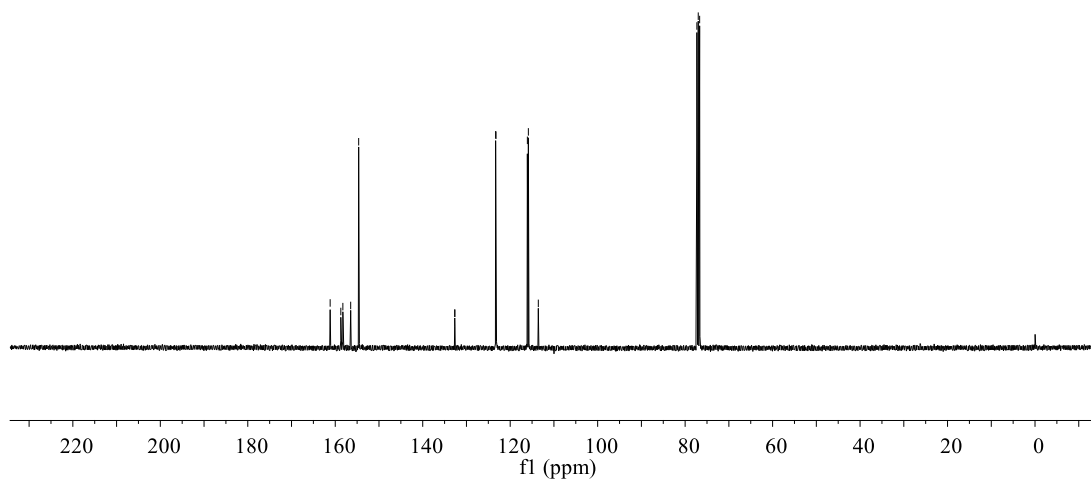

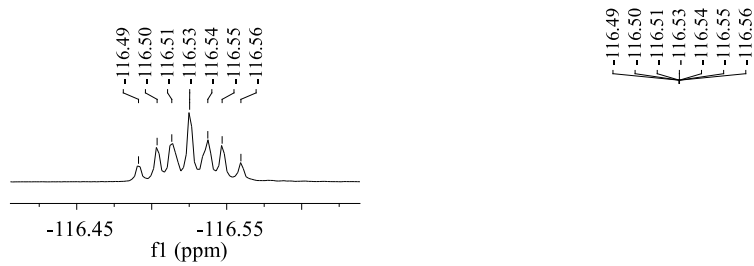

$^{19}\text{F}$  NMR( $\text{CDCl}_3$ )

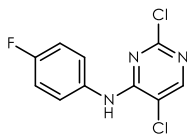

**42-i**

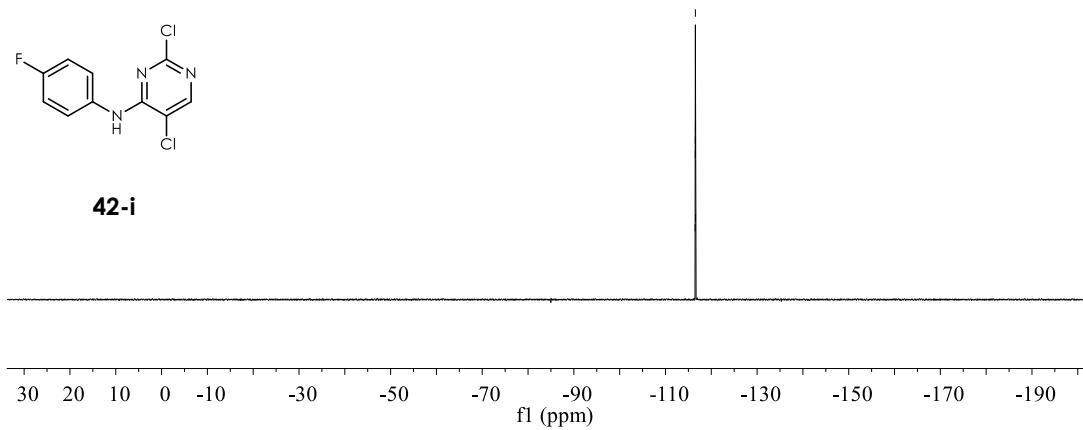

$^1\text{H}$  NMR( $\text{CDCl}_3$ )

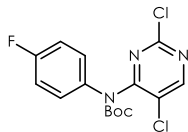

**42**

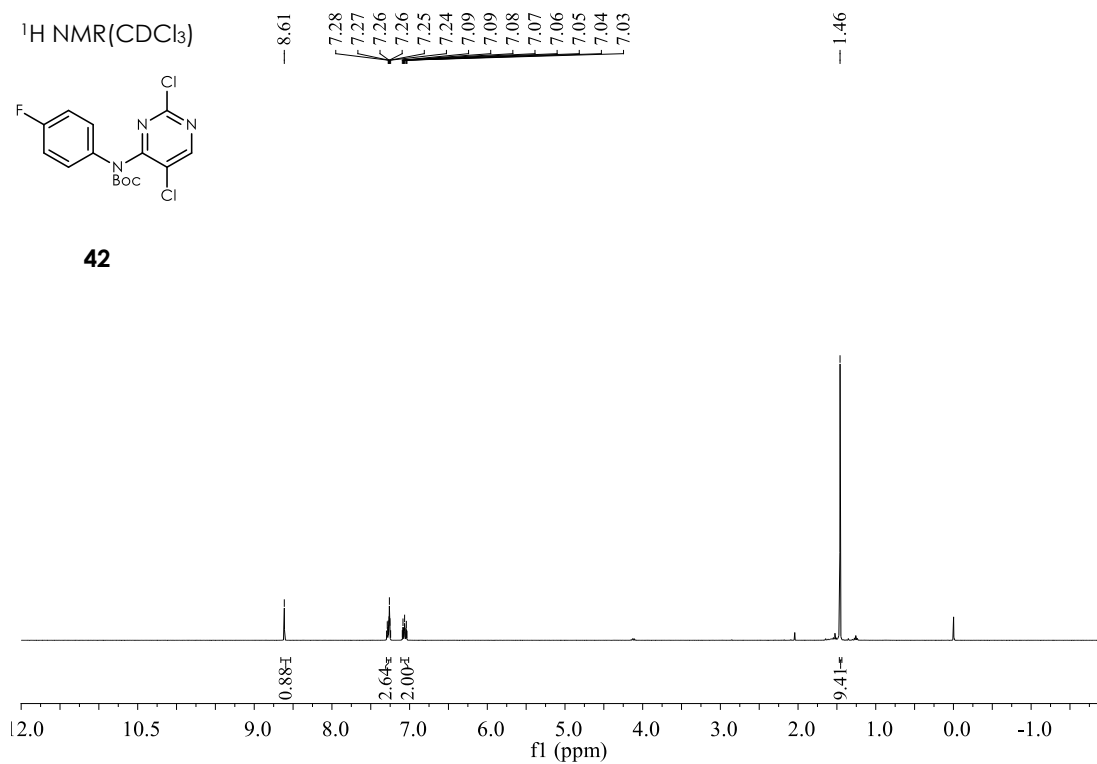

<sup>13</sup>C NMR (CDCl<sub>3</sub>)

162.88  
160.41  
159.97  
158.43  
151.52  
135.10  
135.07  
126.97  
116.18  
115.95  
83.66  
77.32  
77.00  
76.68  
27.92

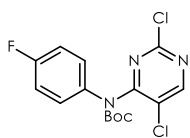

**42**

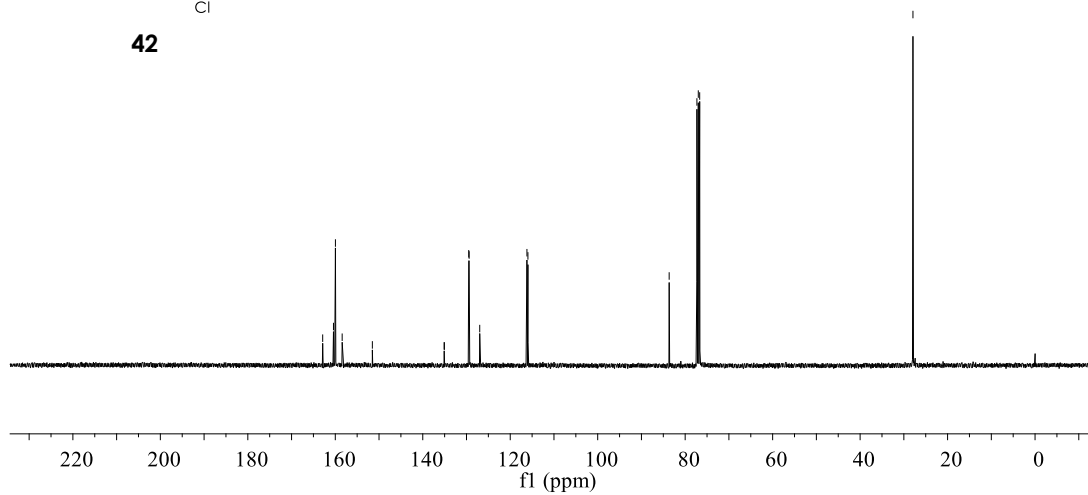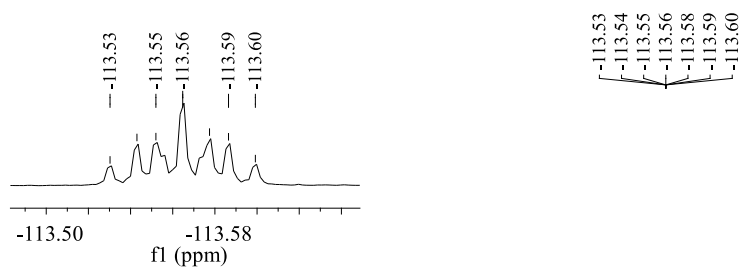

<sup>19</sup>F NMR (CDCl<sub>3</sub>)

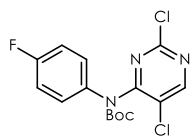

**42**

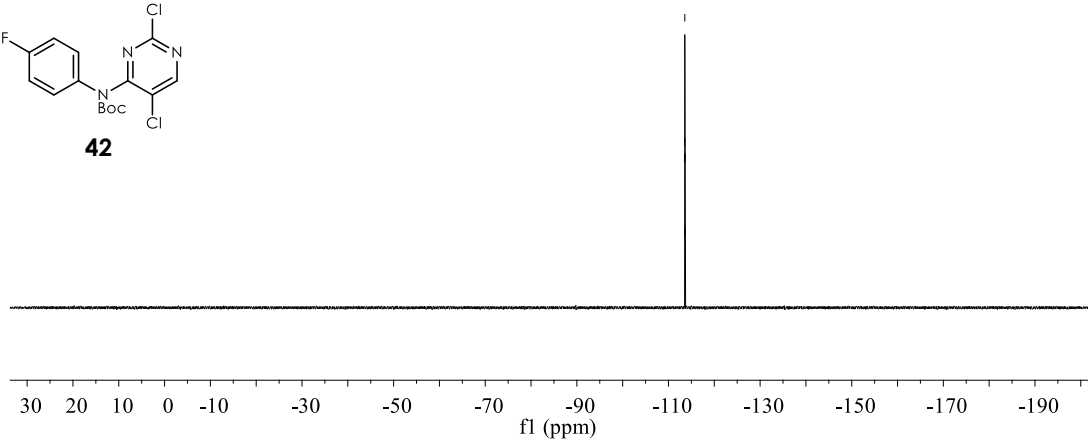

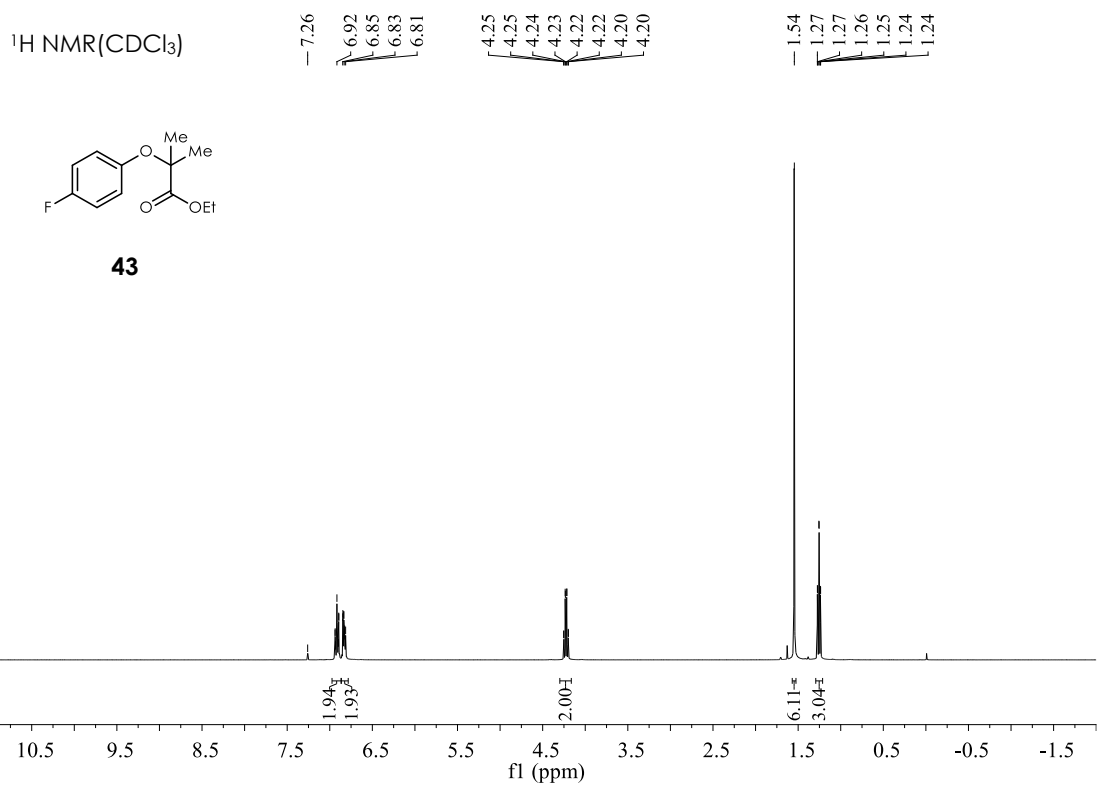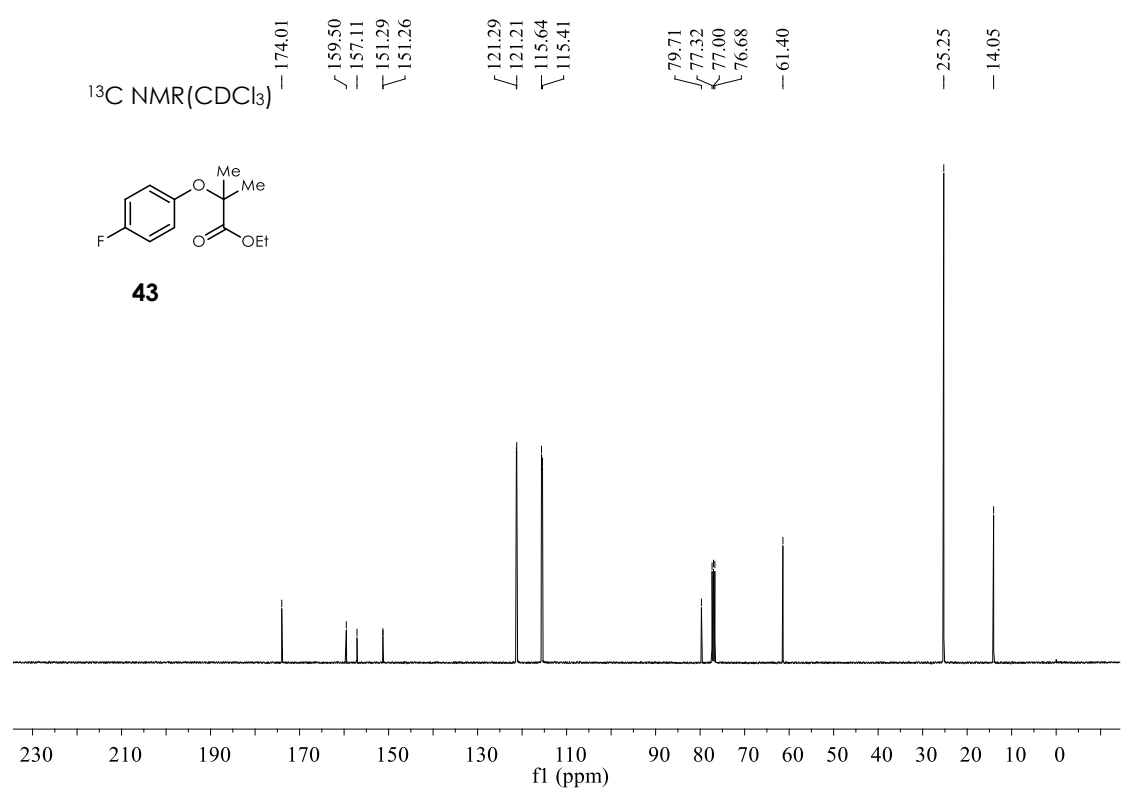

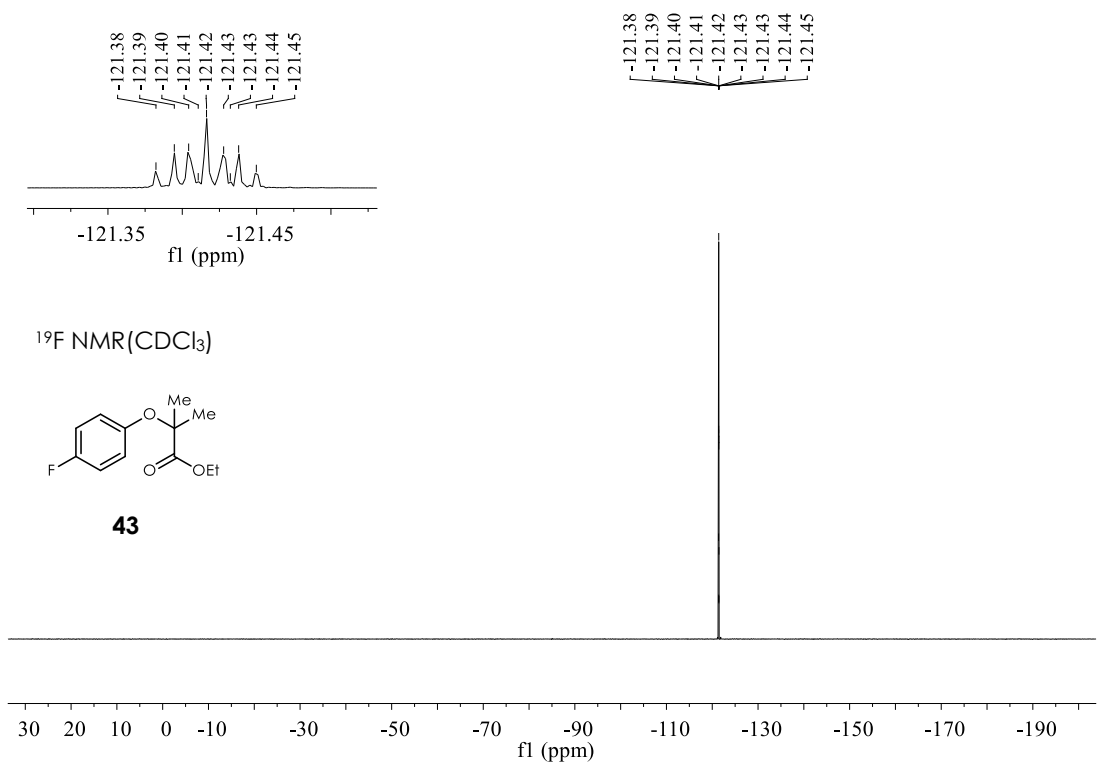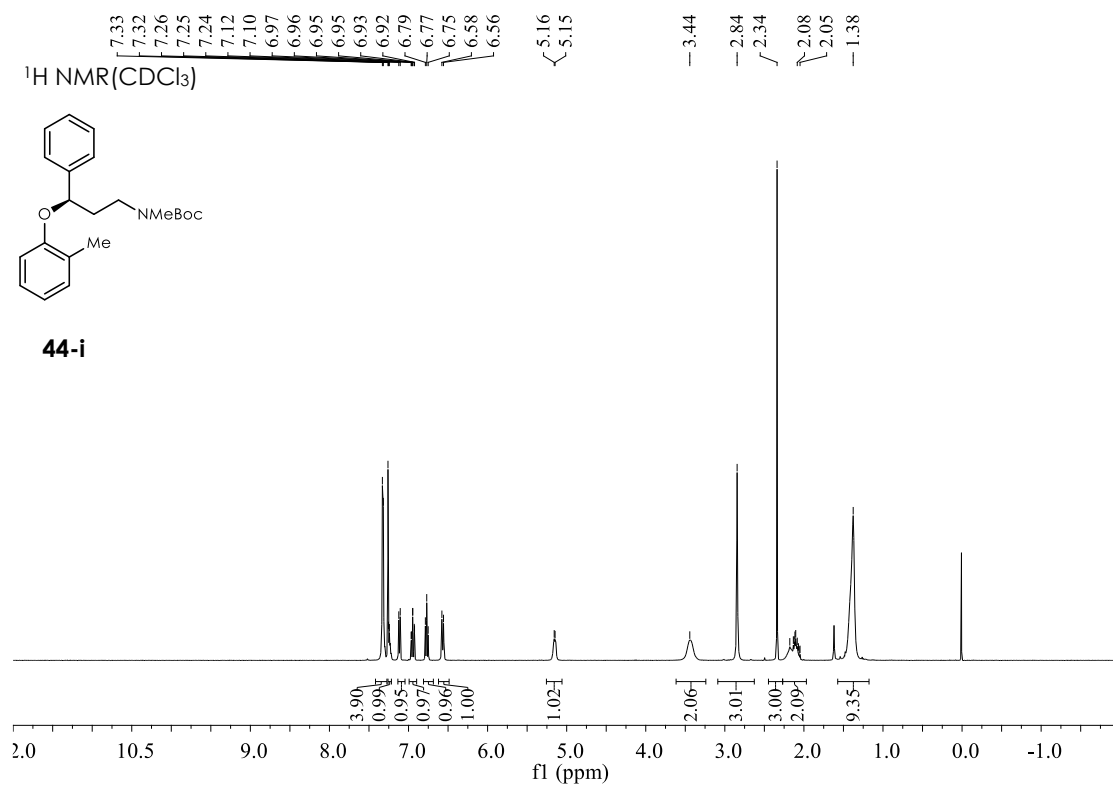

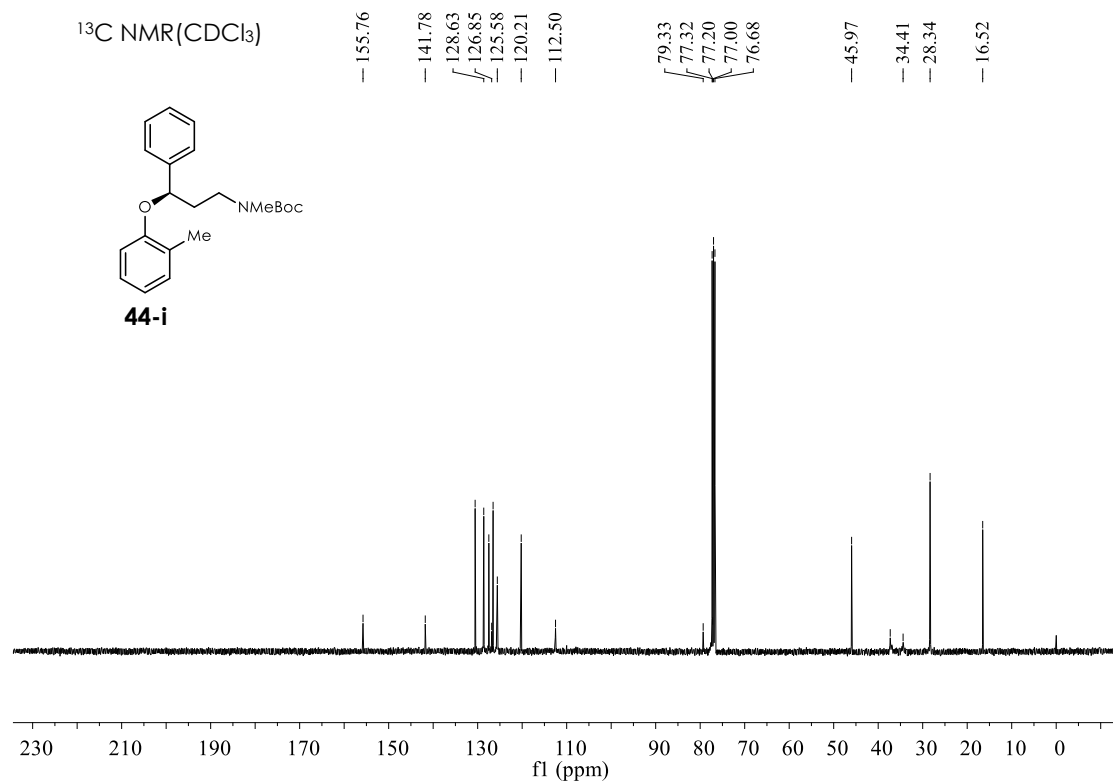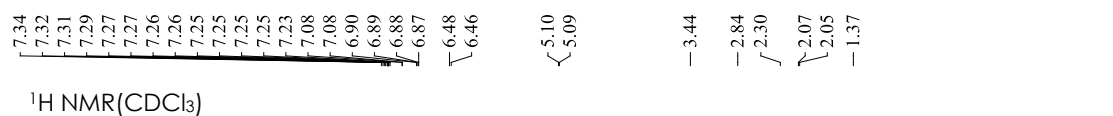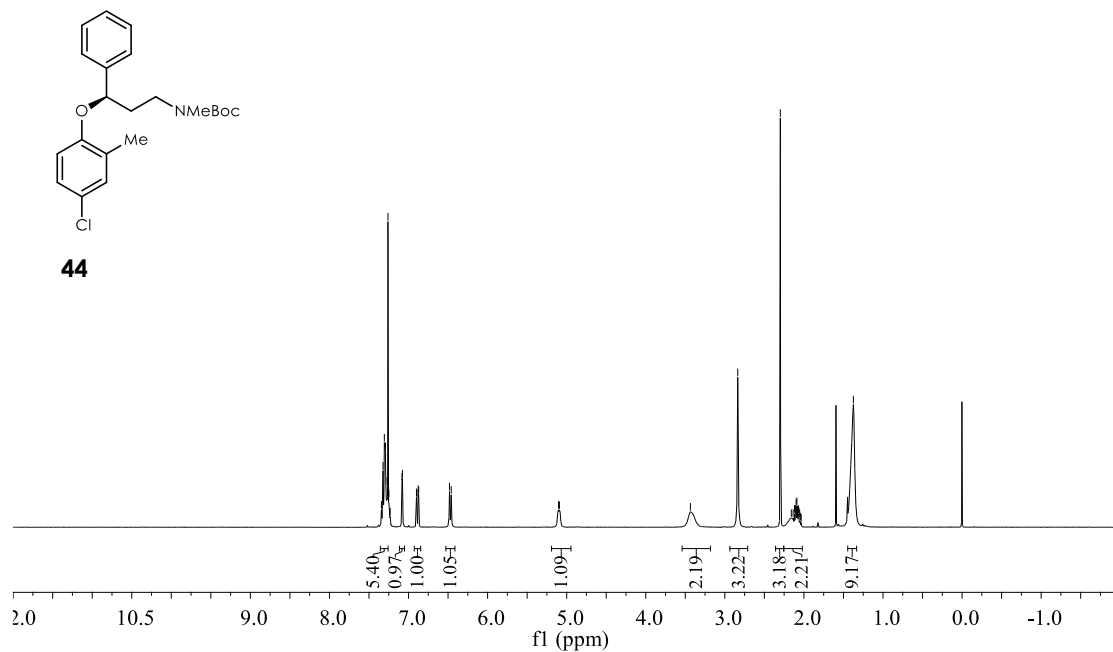



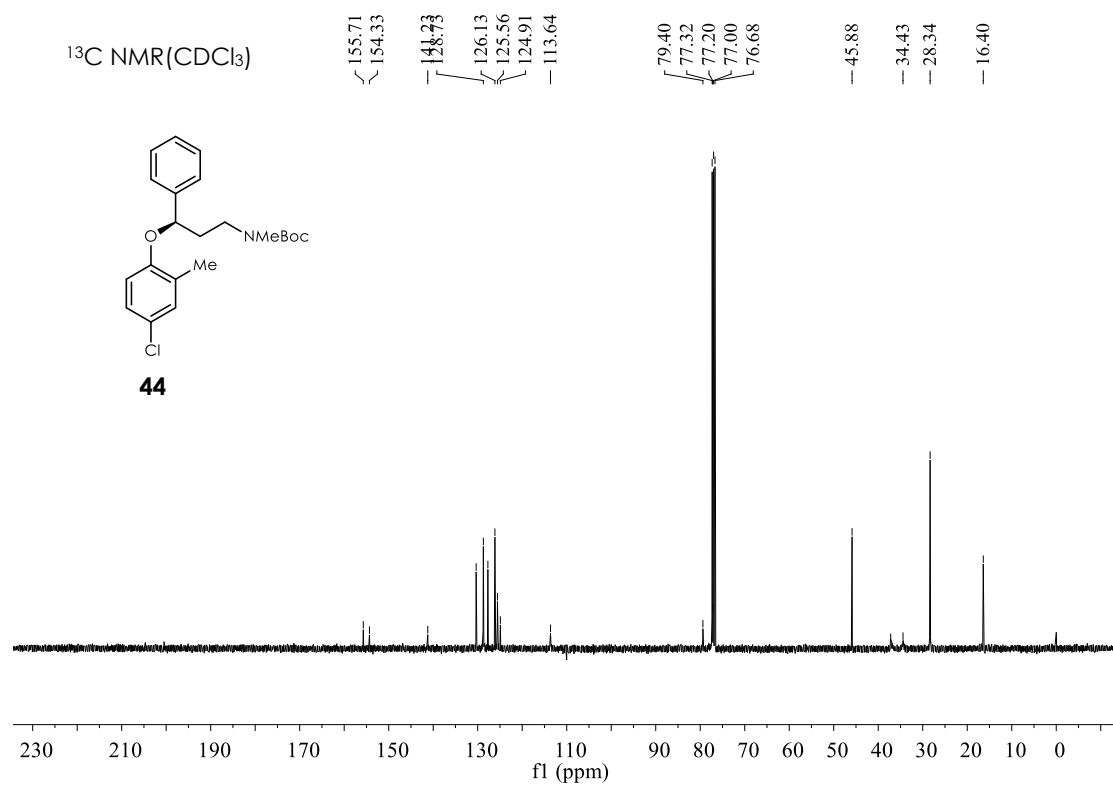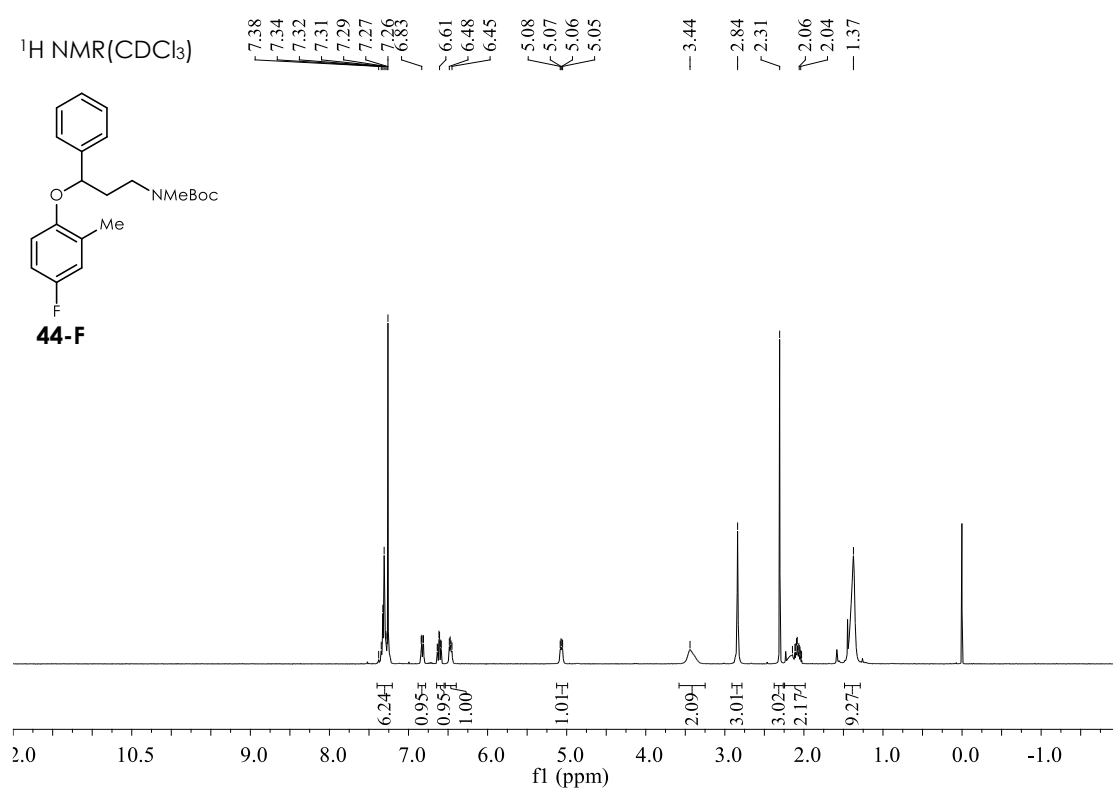

<sup>13</sup>C NMR (CDCl<sub>3</sub>)

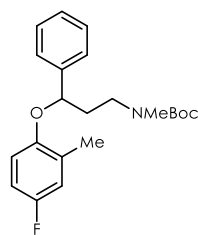

**44-F**

157.803  
155.721  
155.436  
151.799  
141.470  
128.675  
125.624  
117.344  
113.220  
112.262  
112.038  
79.374  
77.318  
77.203  
77.000  
76.683  
45.896  
34.361  
28.327  
16.585

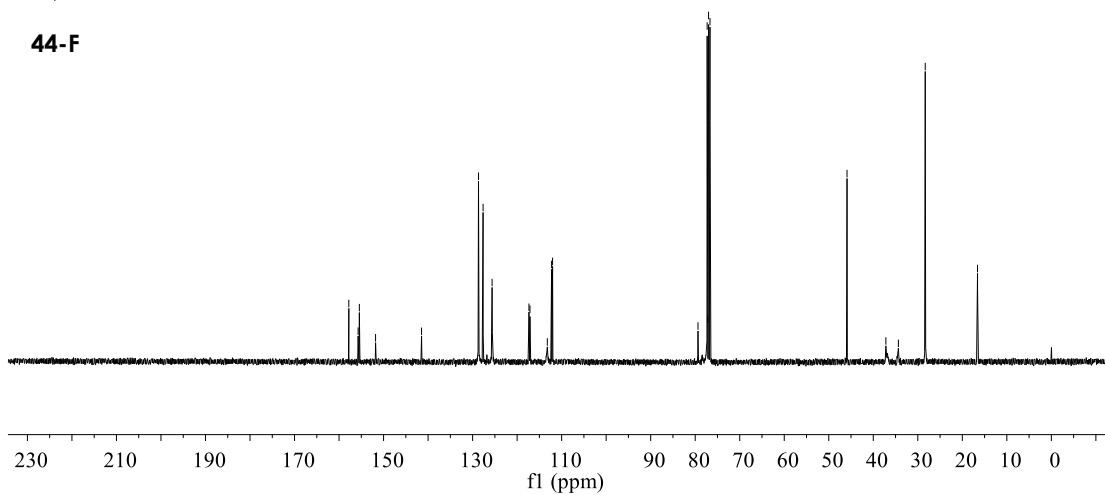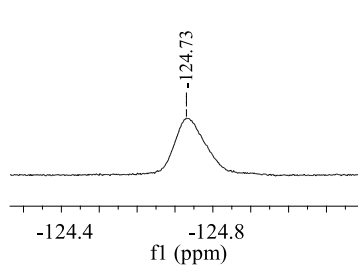

<sup>19</sup>F NMR (CDCl<sub>3</sub>)

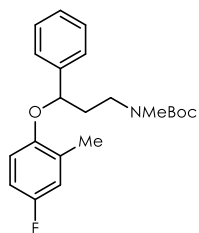

**44-F**

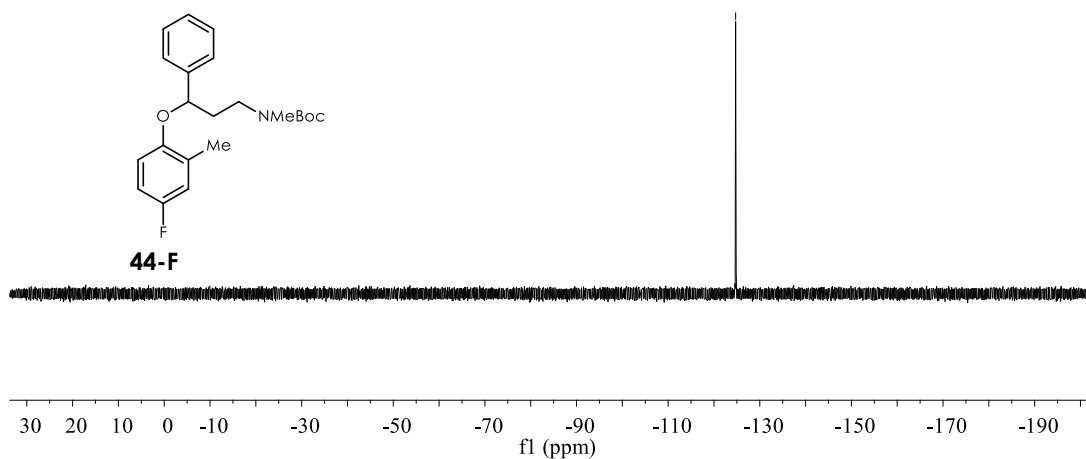

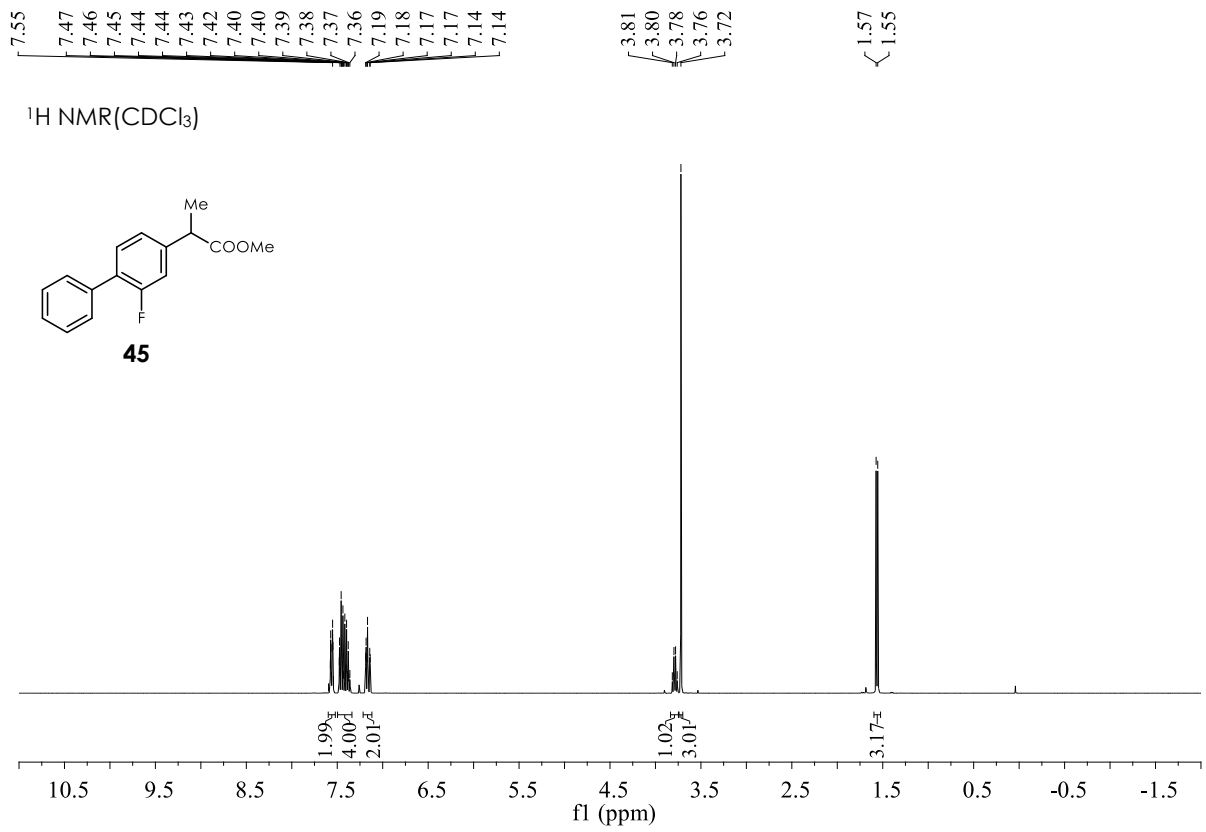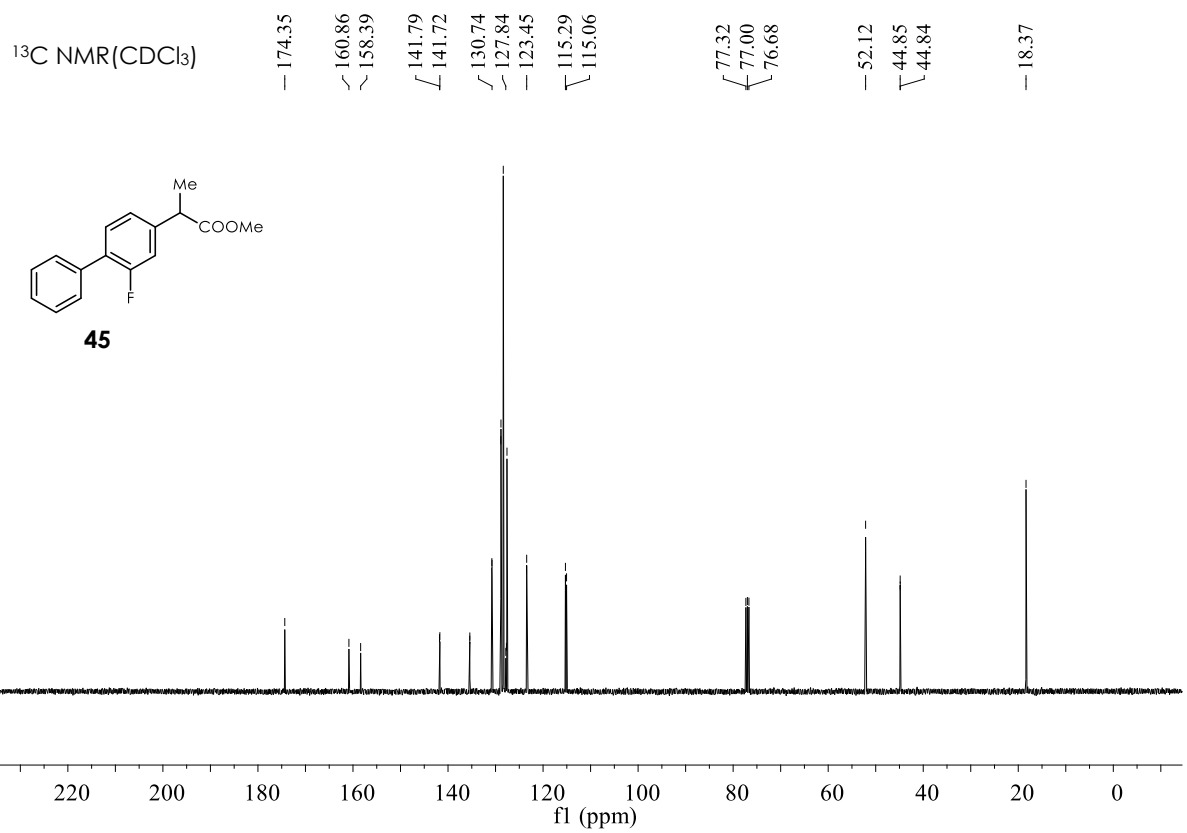

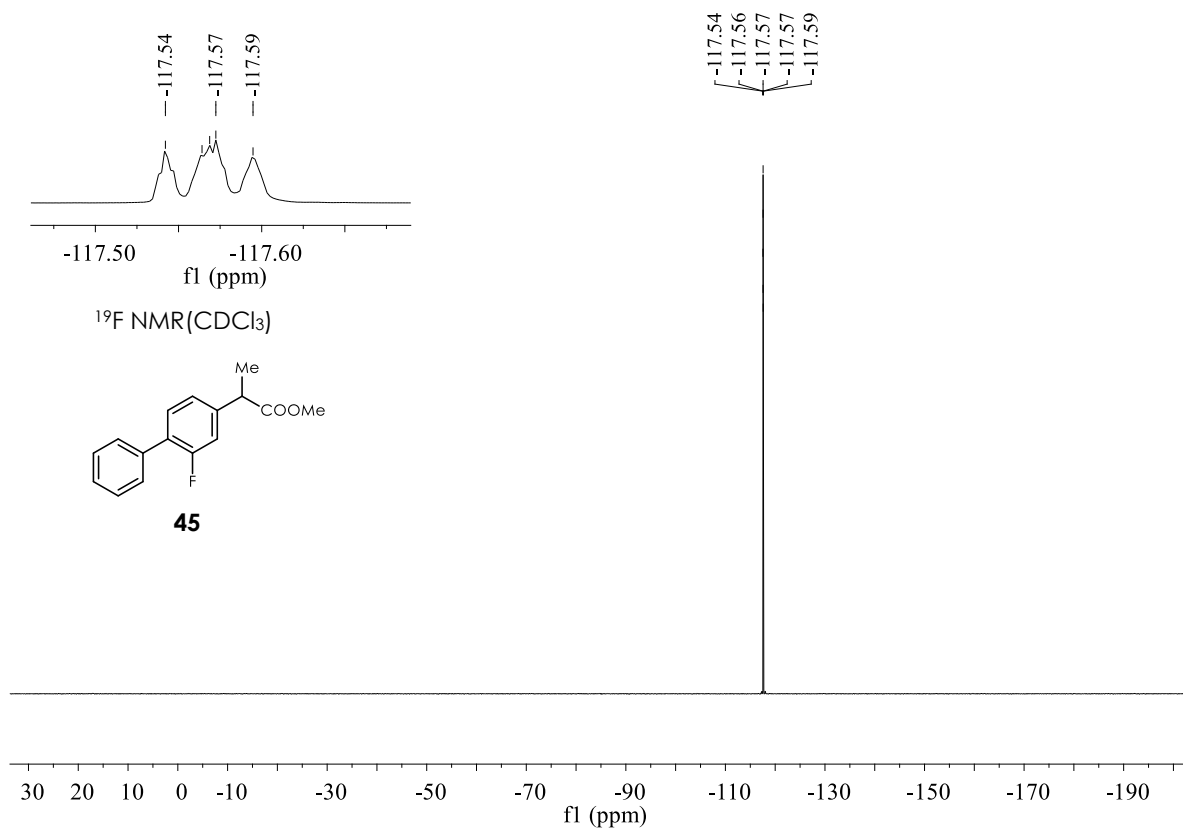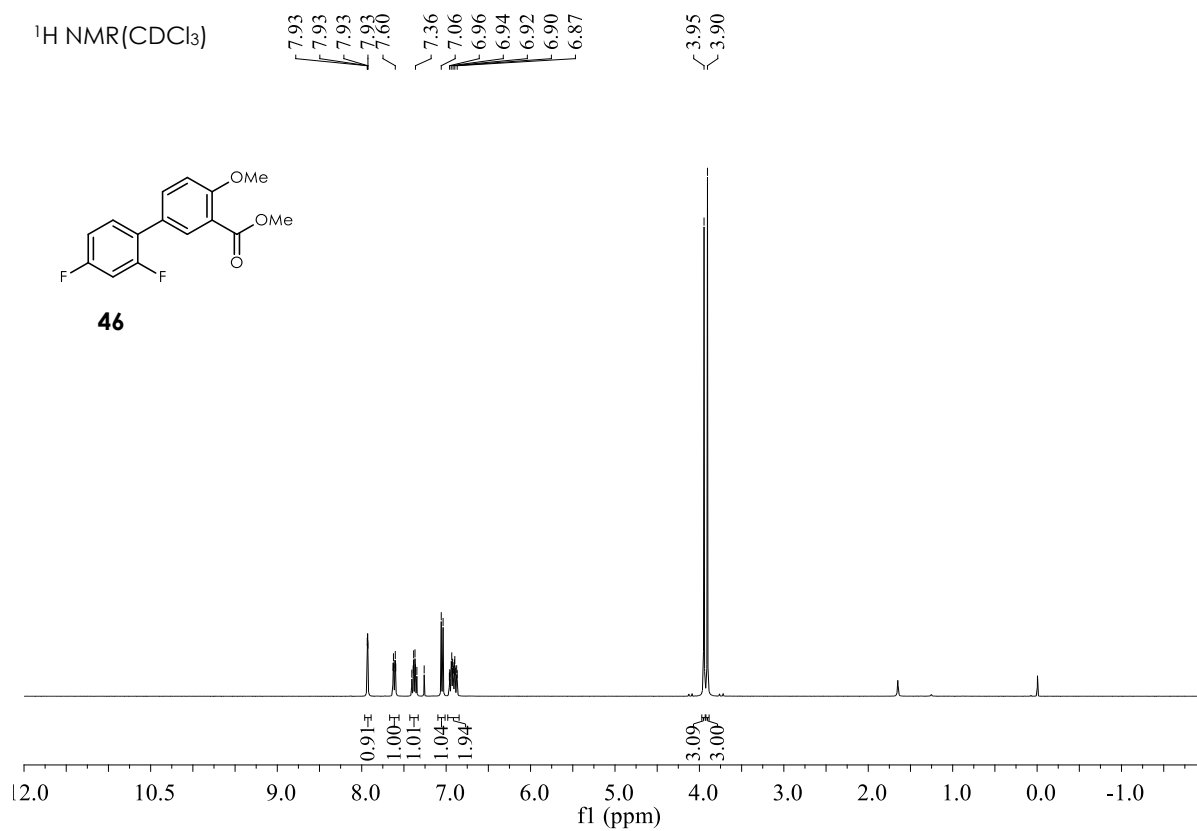

$^{13}\text{C}$  NMR( $\text{CDCl}_3$ )

166.34  
163.44  
163.33  
160.97  
160.93  
160.85  
160.82  
158.67  
158.44  
158.33  
131.05  
126.91  
124.01  
123.88  
120.11  
111.46  
104.36  
104.35  
104.10  
77.32  
77.00  
76.68  
56.13  
52.11

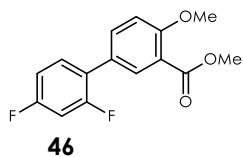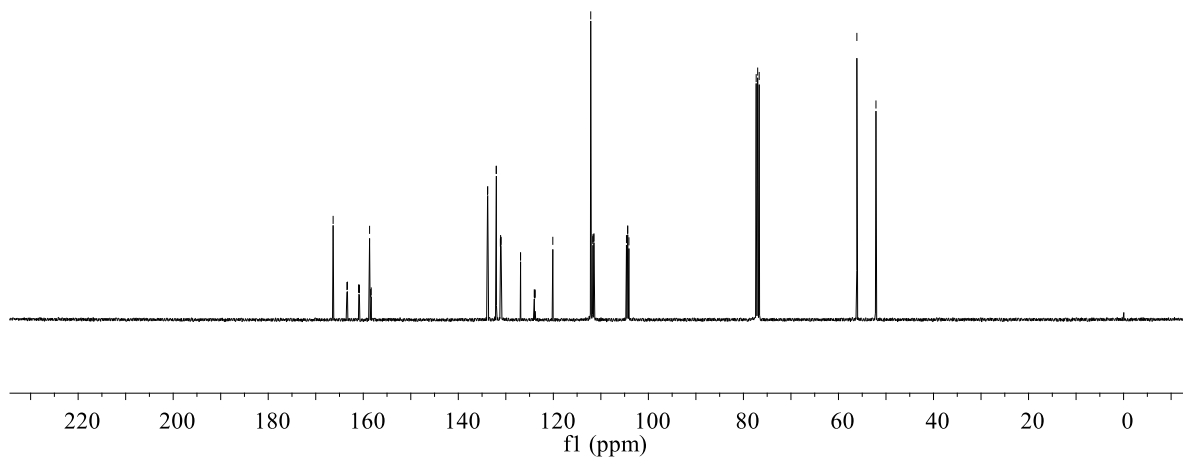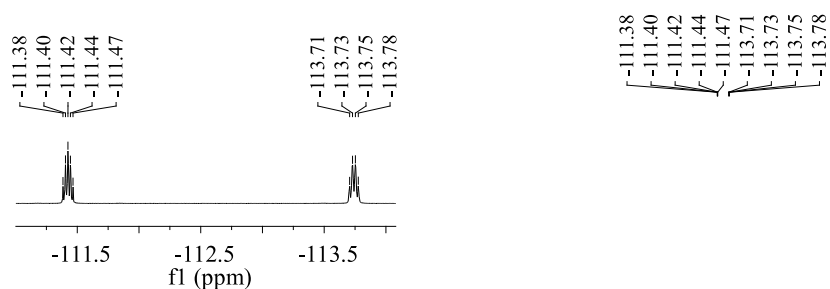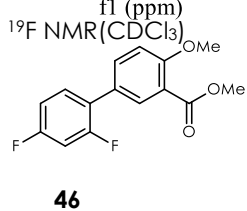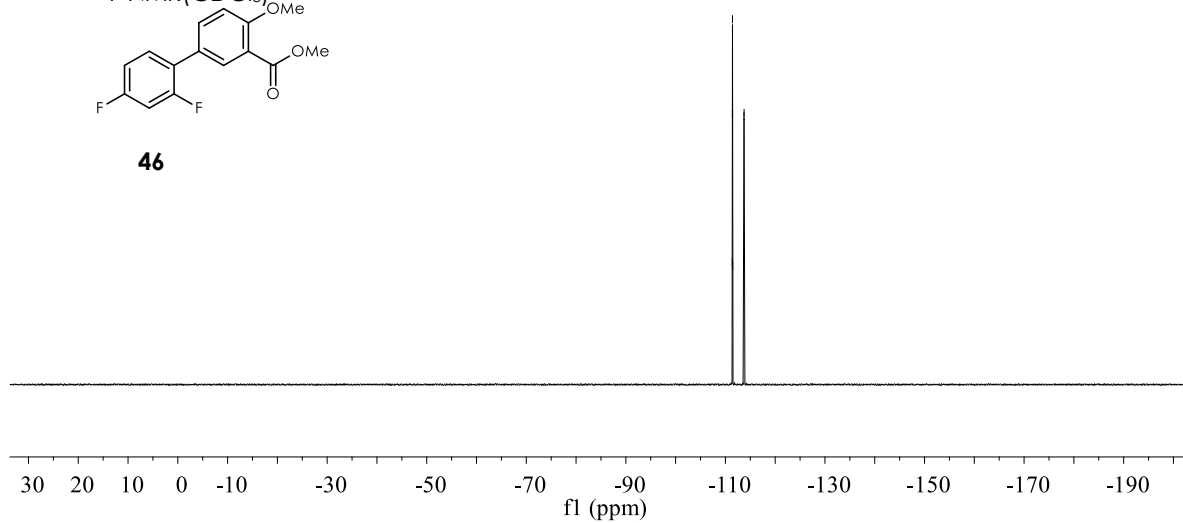

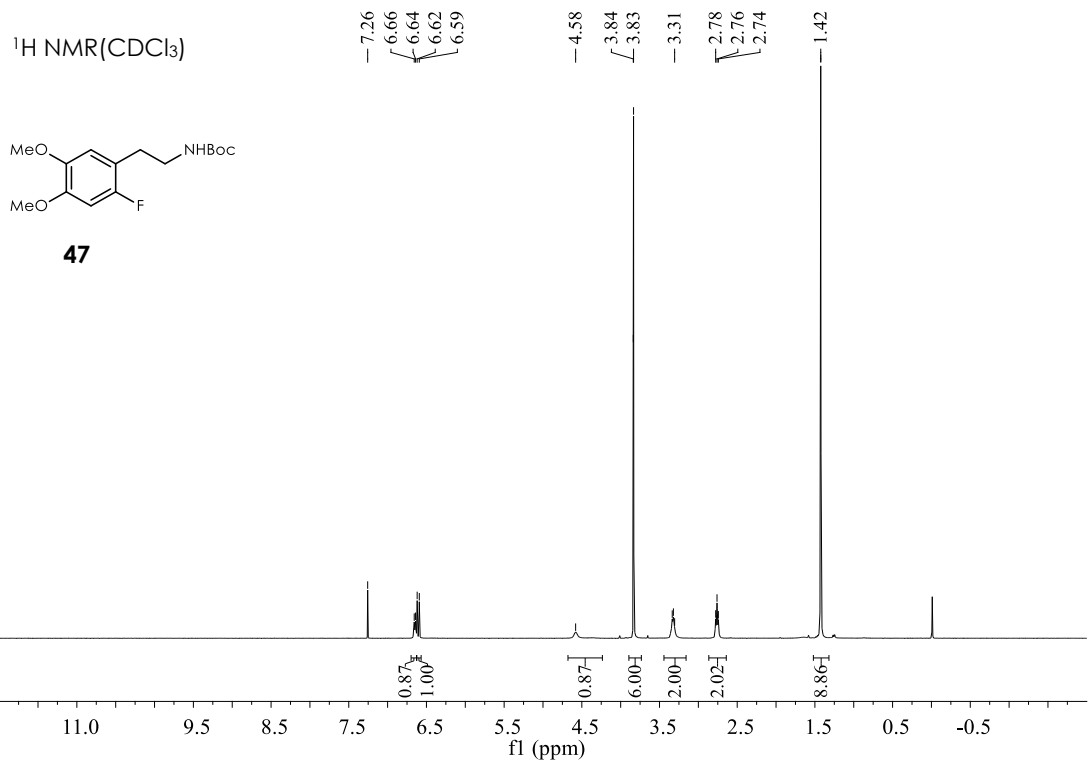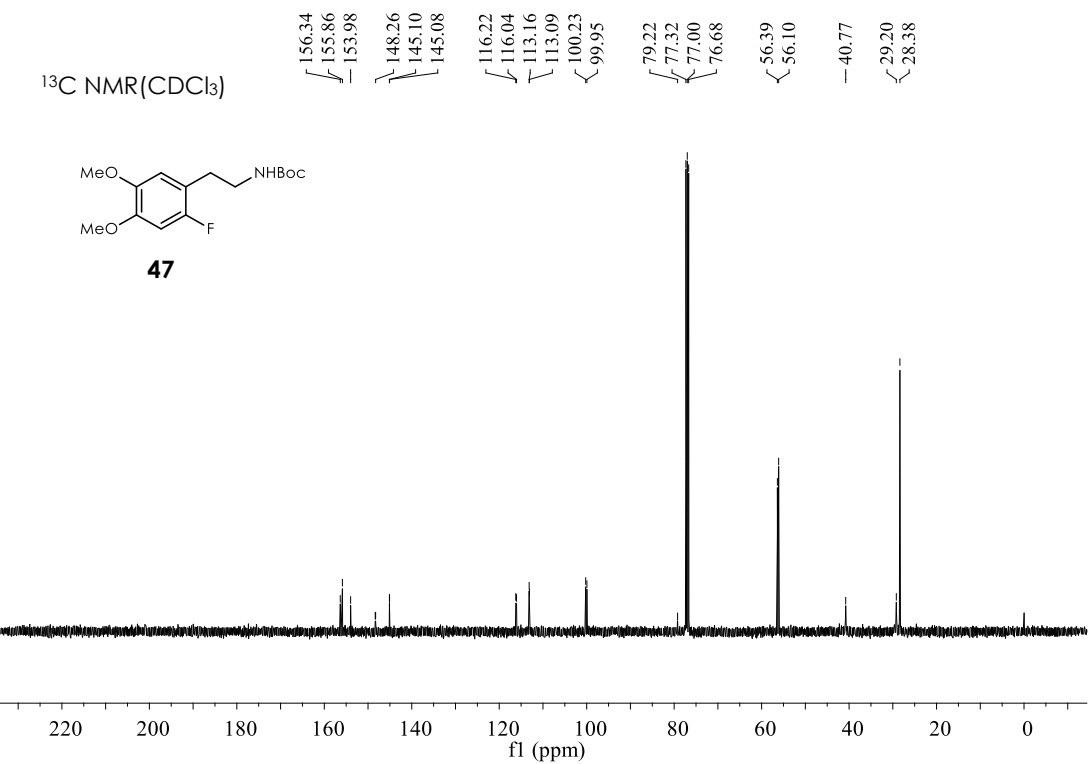

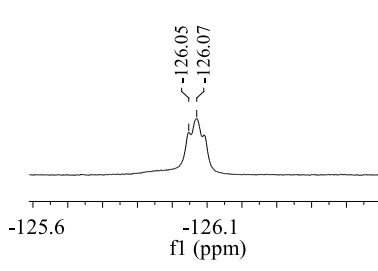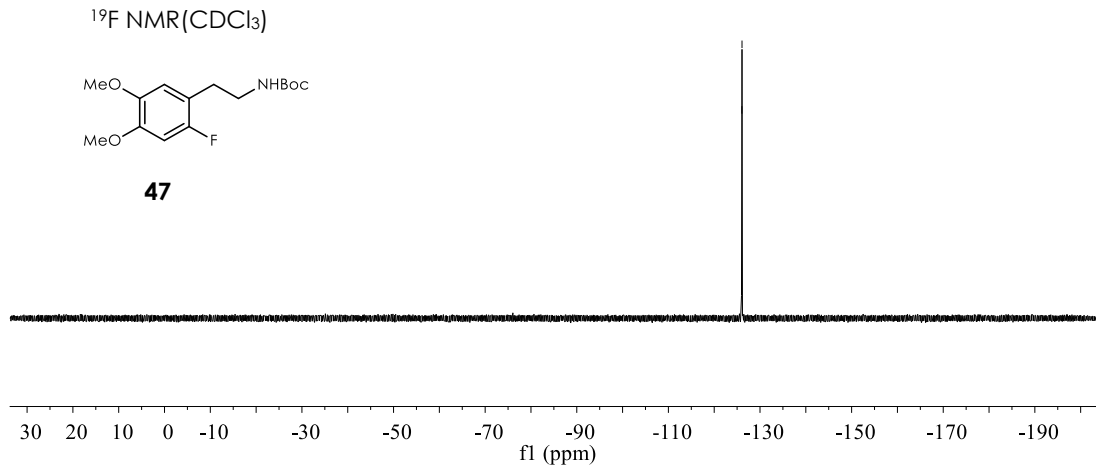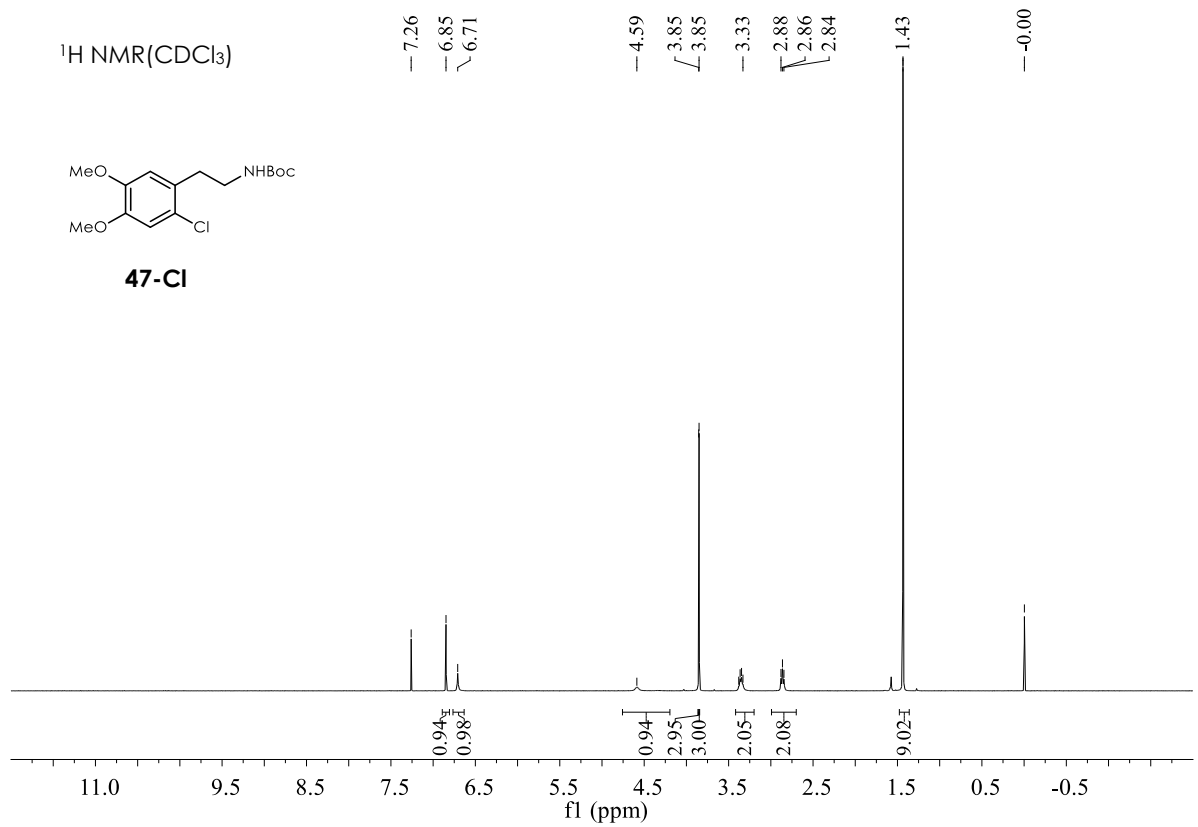

$^{13}\text{C}$  NMR( $\text{CDCl}_3$ )

155.85  
148.11  
147.76  
128.32  
124.89  
113.38  
112.56  
79.19  
77.32  
77.00  
76.68  
56.10  
56.07  
40.32  
33.53  
28.38

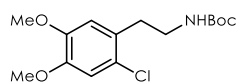

**47-Cl**

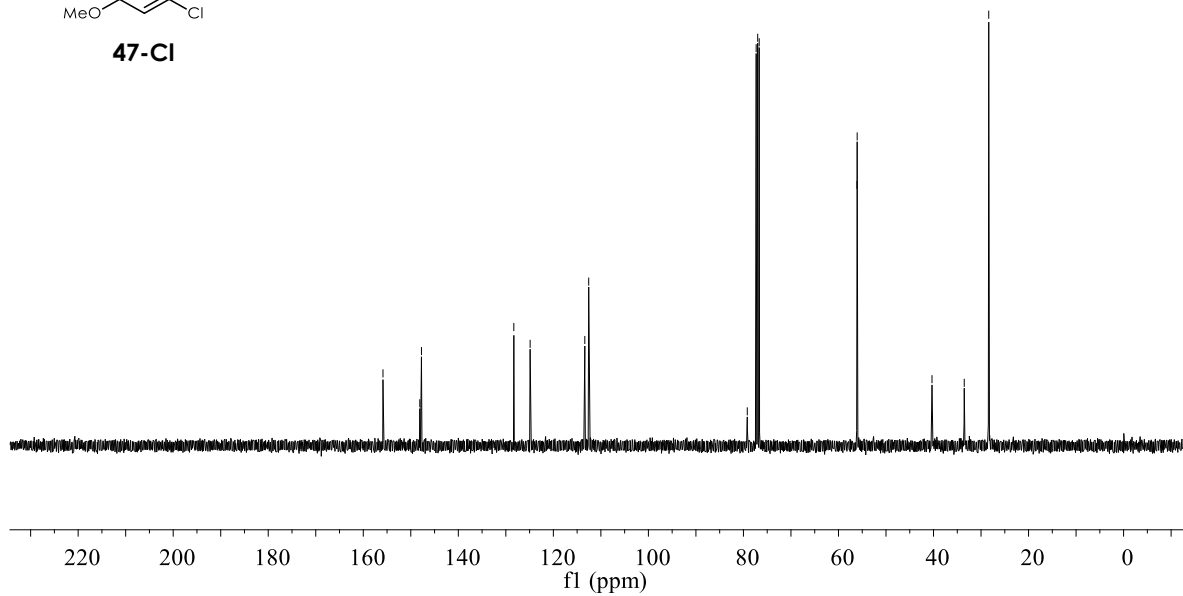

7.32  
7.30  
7.26  
7.23  
7.21  
7.21  
7.19  
7.15  
7.11  
7.09  
7.07  
7.04  
7.02  
7.00  
6.98  
6.91  
6.90  
6.88  
6.87  
6.85  
6.68  
6.66  
5.24  
5.20  
4.81  
4.78  
3.66  
1.99

$^1\text{H}$  NMR( $\text{CDCl}_3$ )

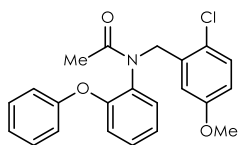

**48**

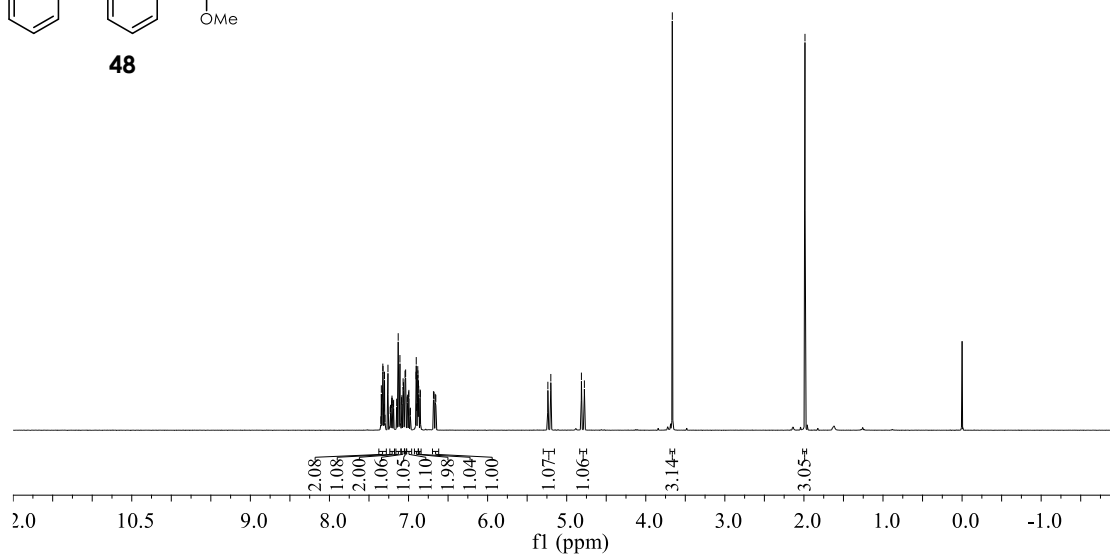



<sup>13</sup>C NMR(CDCl<sub>3</sub>)

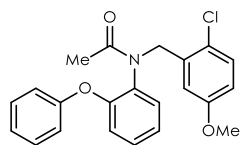

**48**

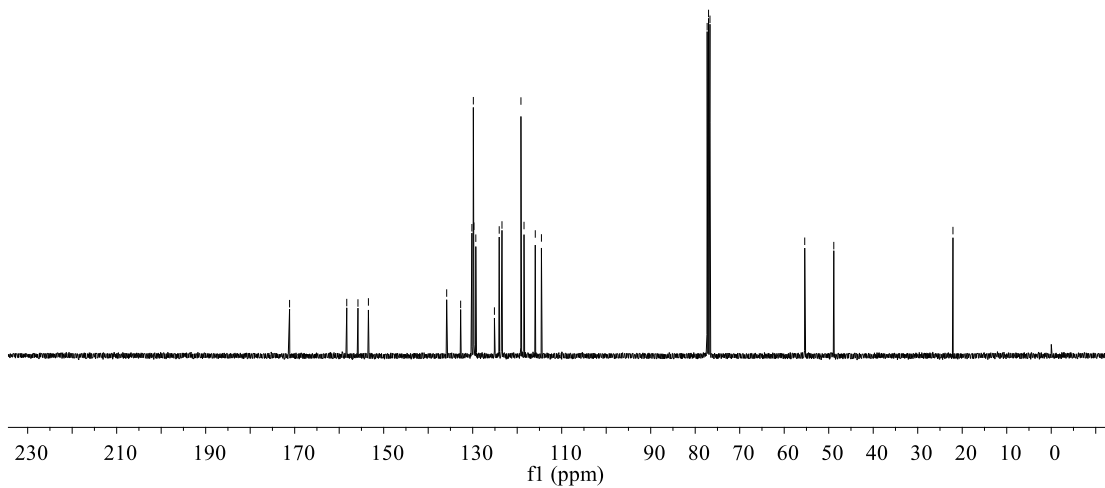

<sup>1</sup>H NMR(CDCl<sub>3</sub>)

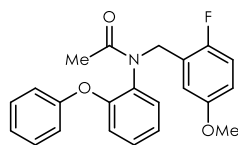

**48-F**

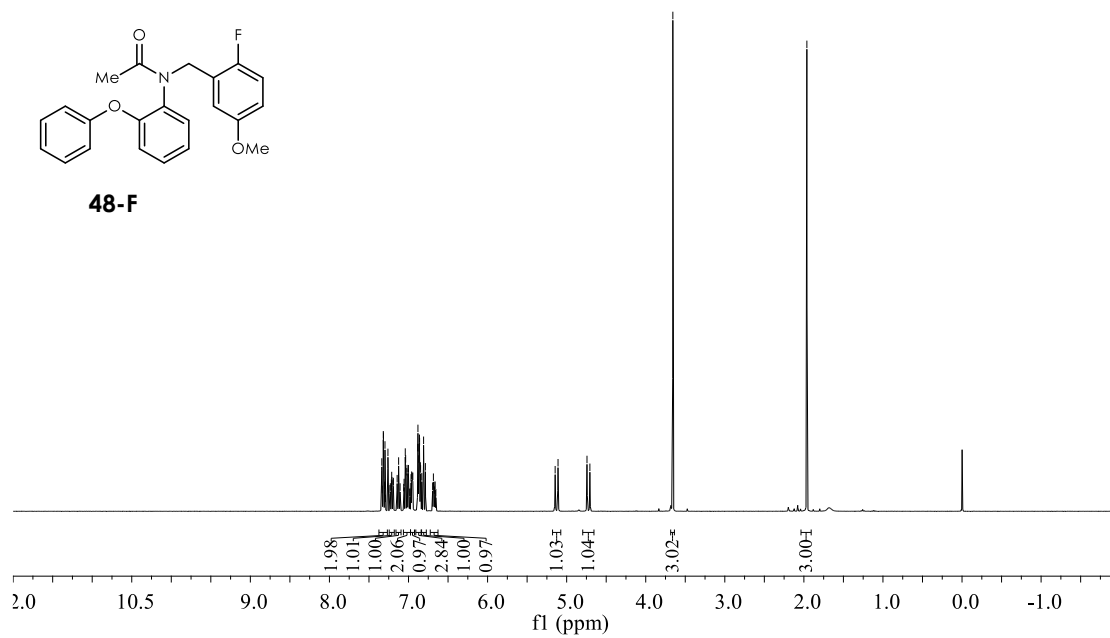

$^{13}\text{C}$  NMR ( $\text{CDCl}_3$ )

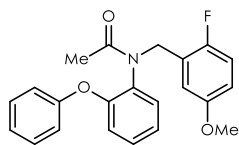

**48-F**

171.13  
155.82  
155.54  
155.52  
139.80  
153.42  
123.37  
119.11  
118.48  
115.72  
115.68  
115.58  
115.34  
114.54  
114.46

77.32  
77.00  
76.68

55.63  
44.86  
44.83

22.11

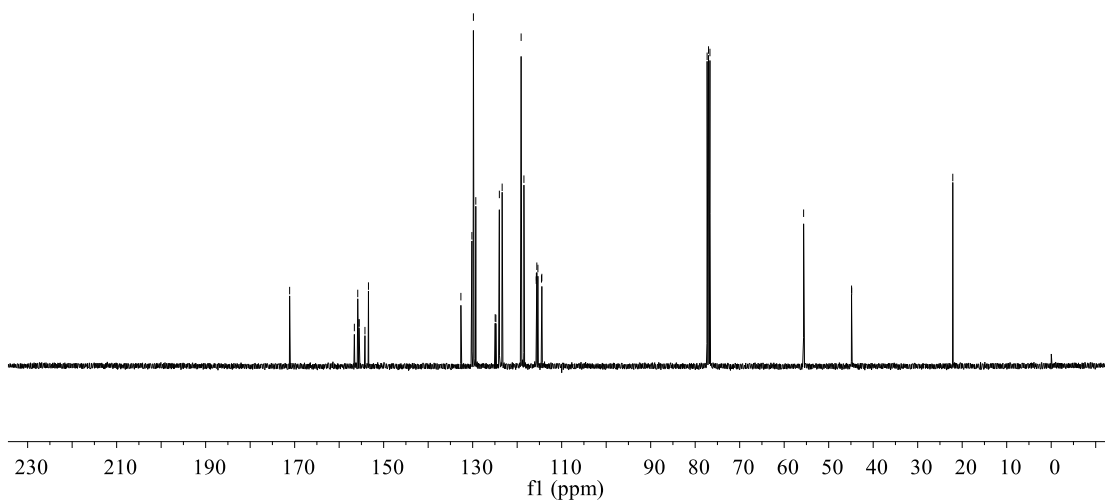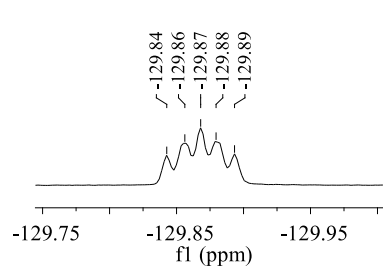

$^{19}\text{F}$  NMR ( $\text{CDCl}_3$ )

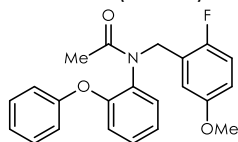

**48-F**

-129.84  
-129.86  
-129.87  
-129.88  
-129.89

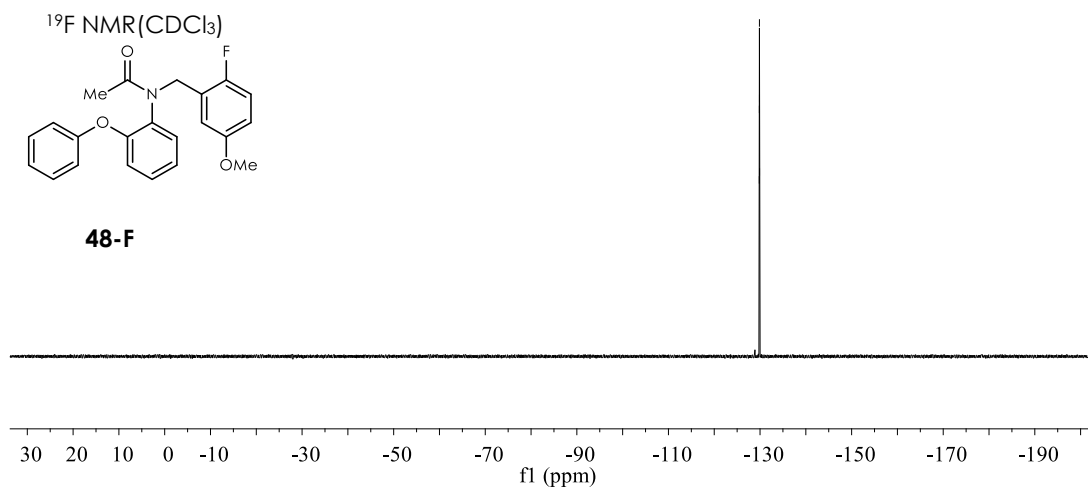

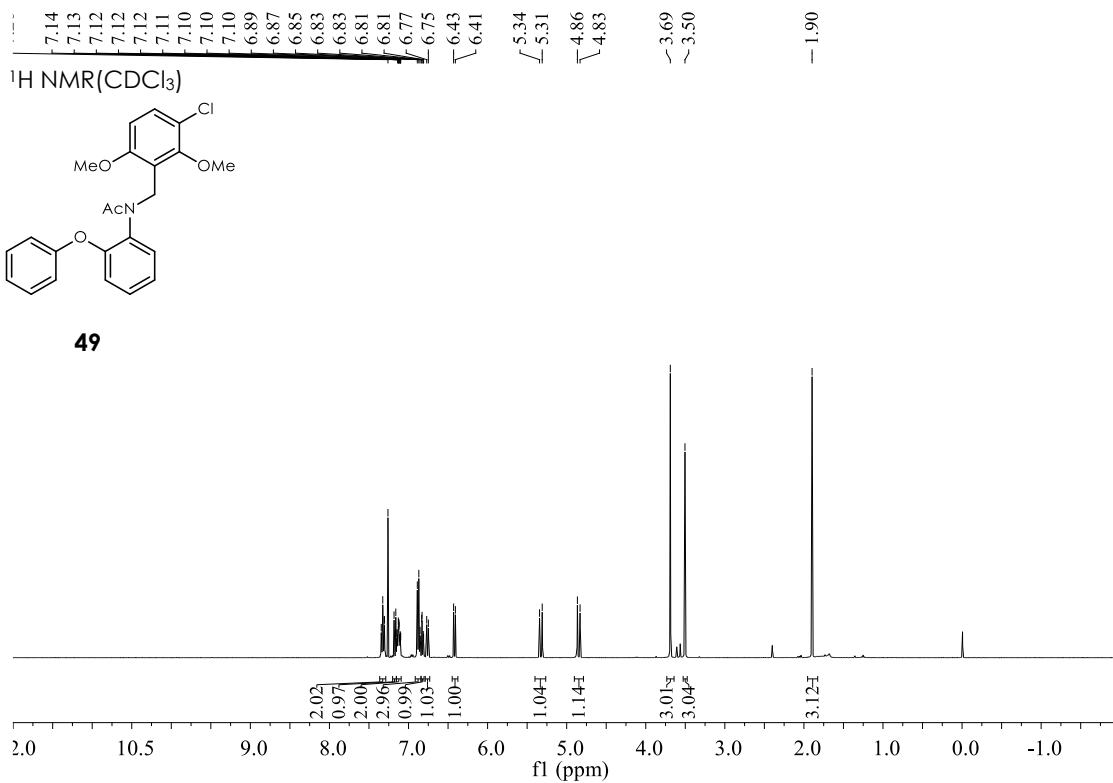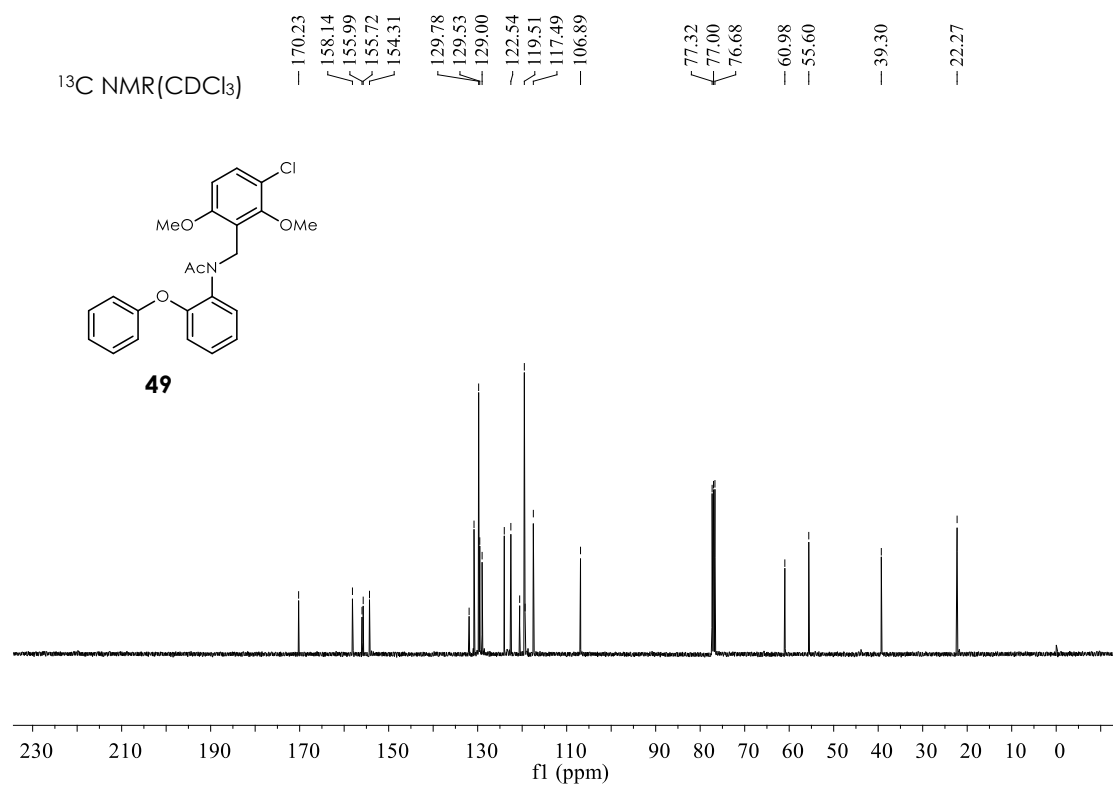

<sup>1</sup>H NMR(CDCl<sub>3</sub>)

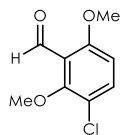

**49-i**

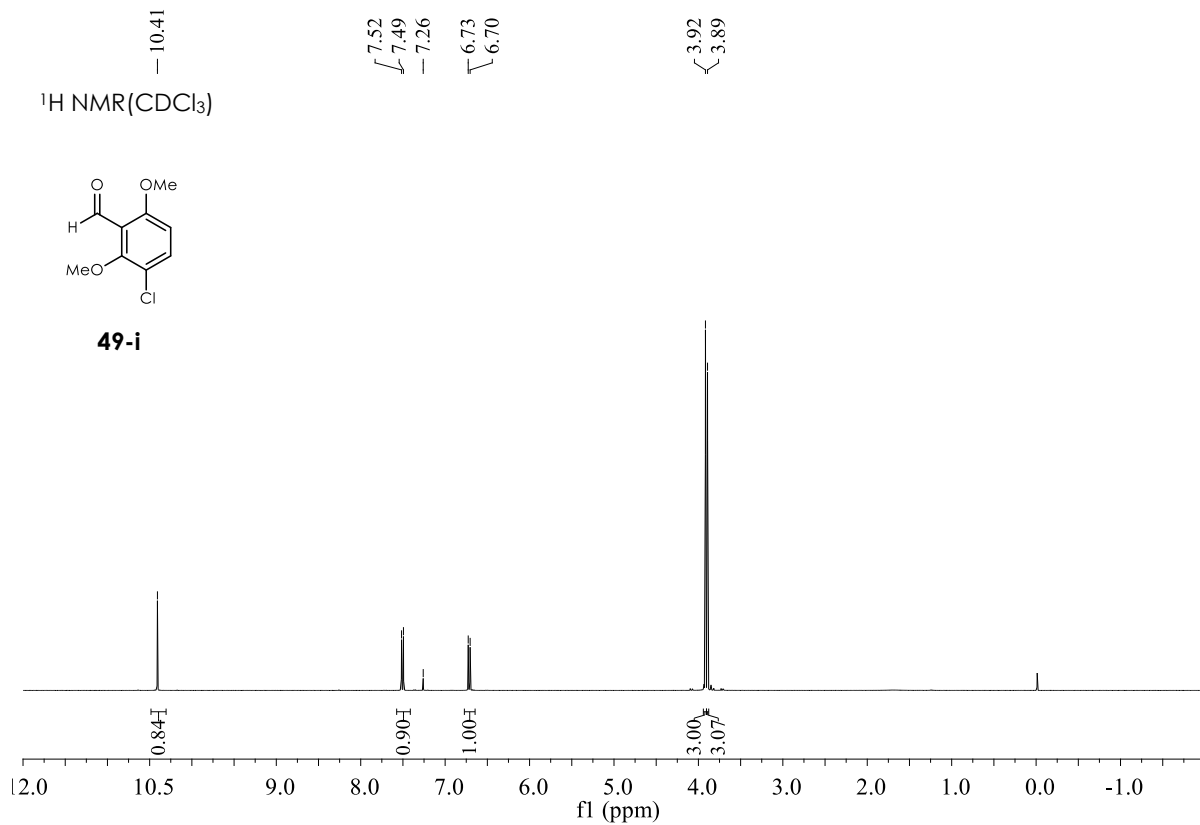

<sup>13</sup>C NMR(CDCl<sub>3</sub>)

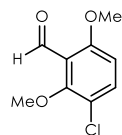

**49-i**

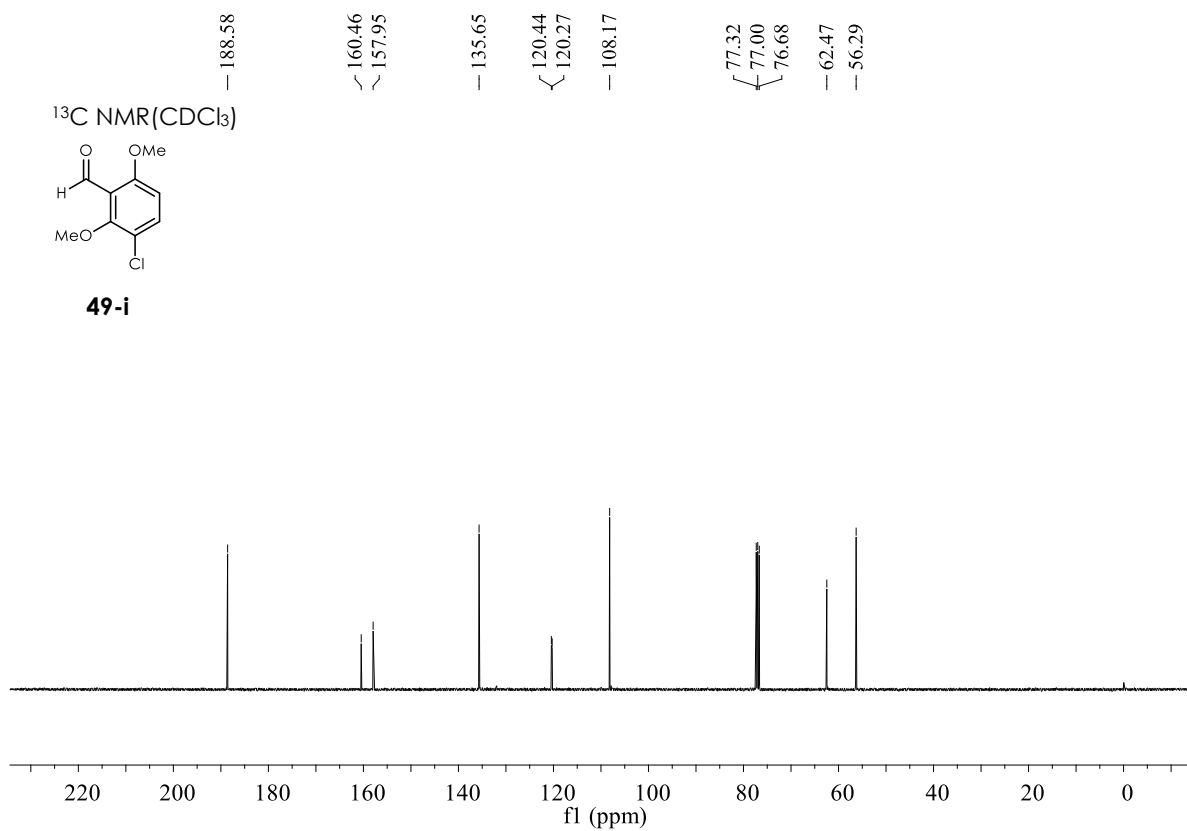

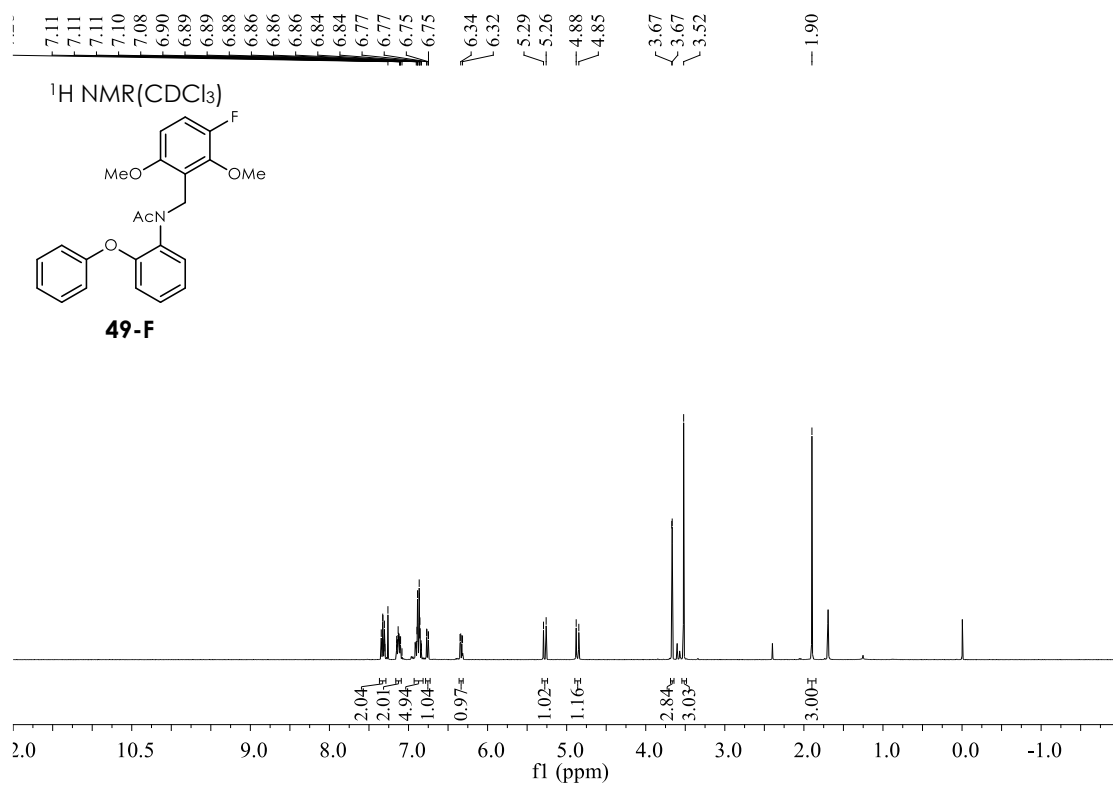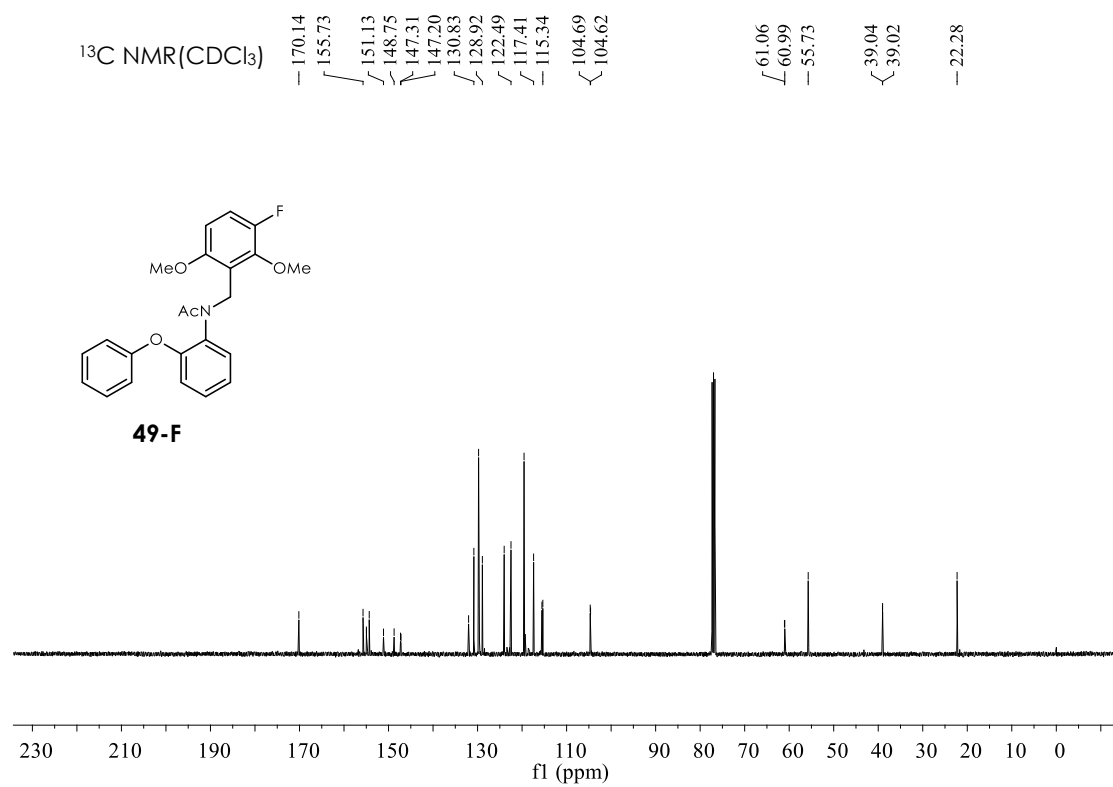

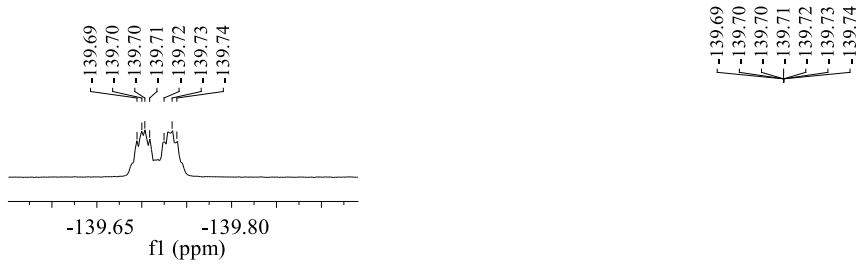

$^{19}\text{F}$  NMR( $\text{CDCl}_3$ )

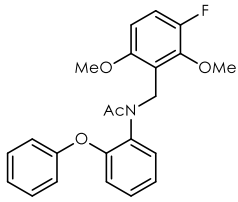

**49-F**

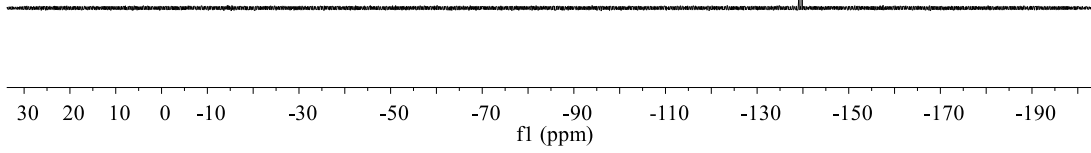

$^1\text{H}$  NMR( $\text{CDCl}_3$ )

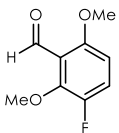

**49-F-i**

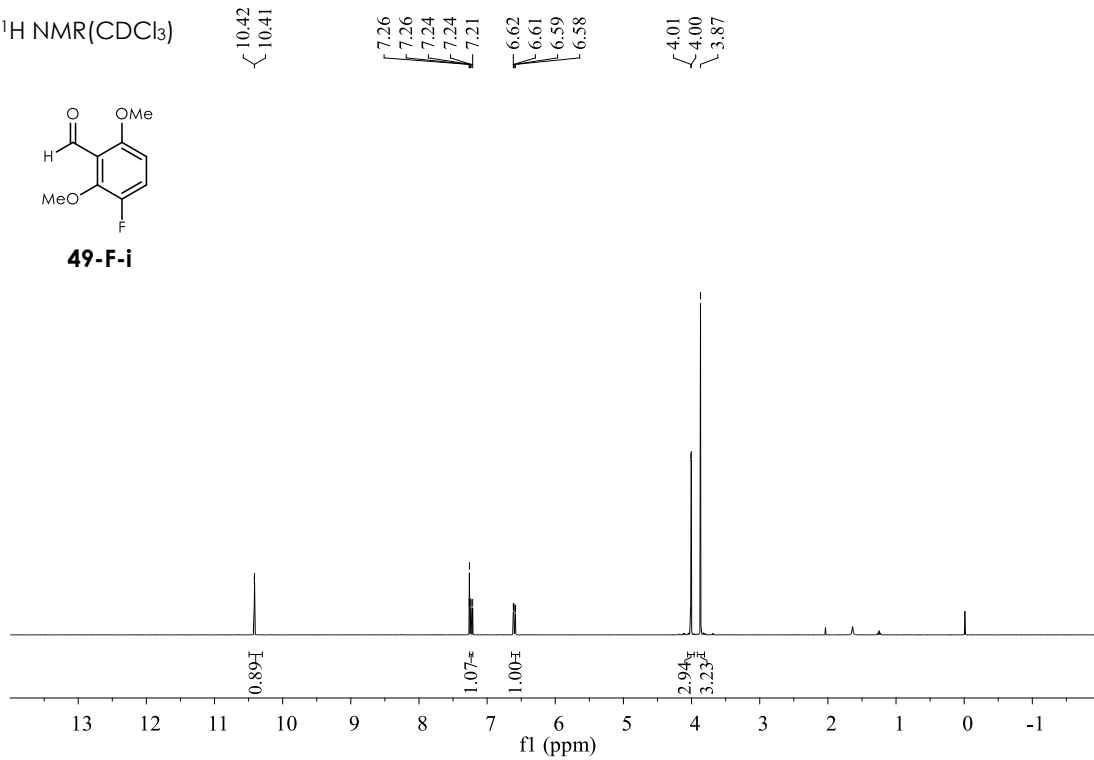

$^{13}\text{C}$  NMR ( $\text{CDCl}_3$ )

188.78  
188.75

157.26  
157.24  
150.62  
149.50  
148.22

122.28  
122.07  
119.17

105.90  
105.83

77.32  
77.00  
76.68

62.28  
62.21  
56.31

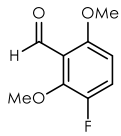

**49-F-i**

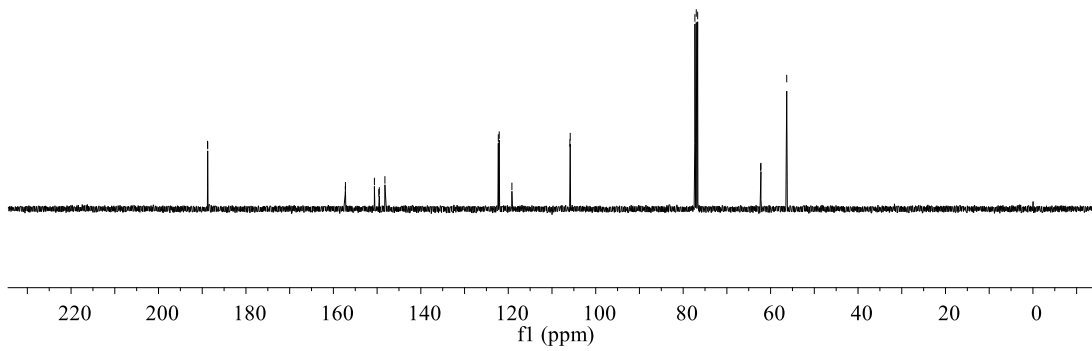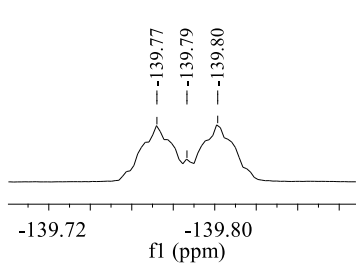

-139.77  
-139.79  
-139.80

$^{19}\text{F}$  NMR ( $\text{CDCl}_3$ )

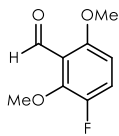

**49-F-i**

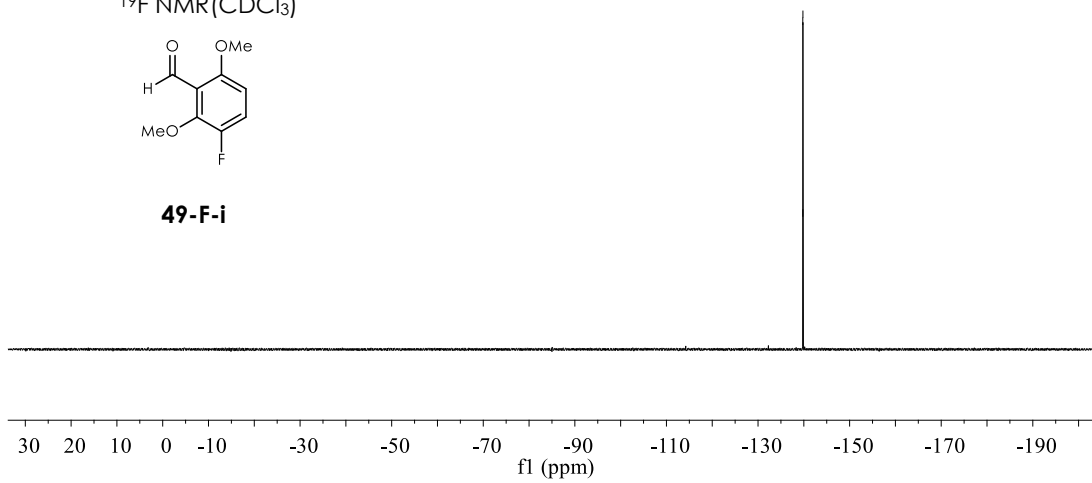

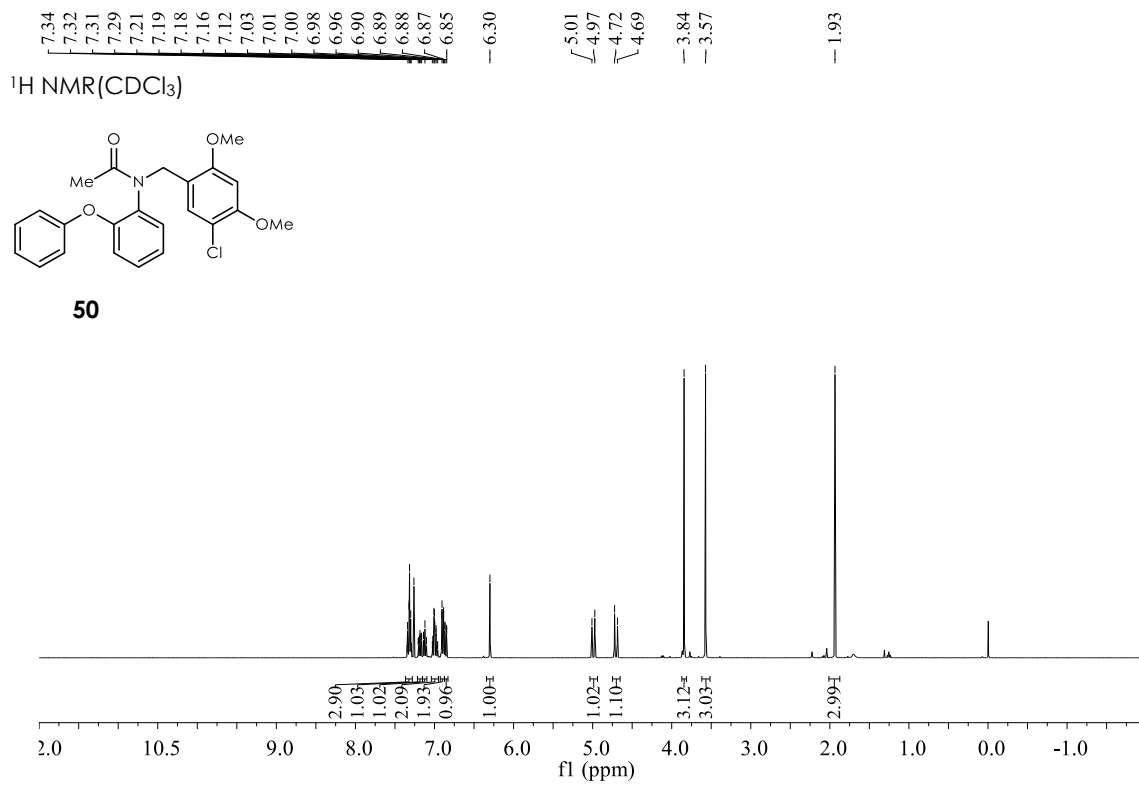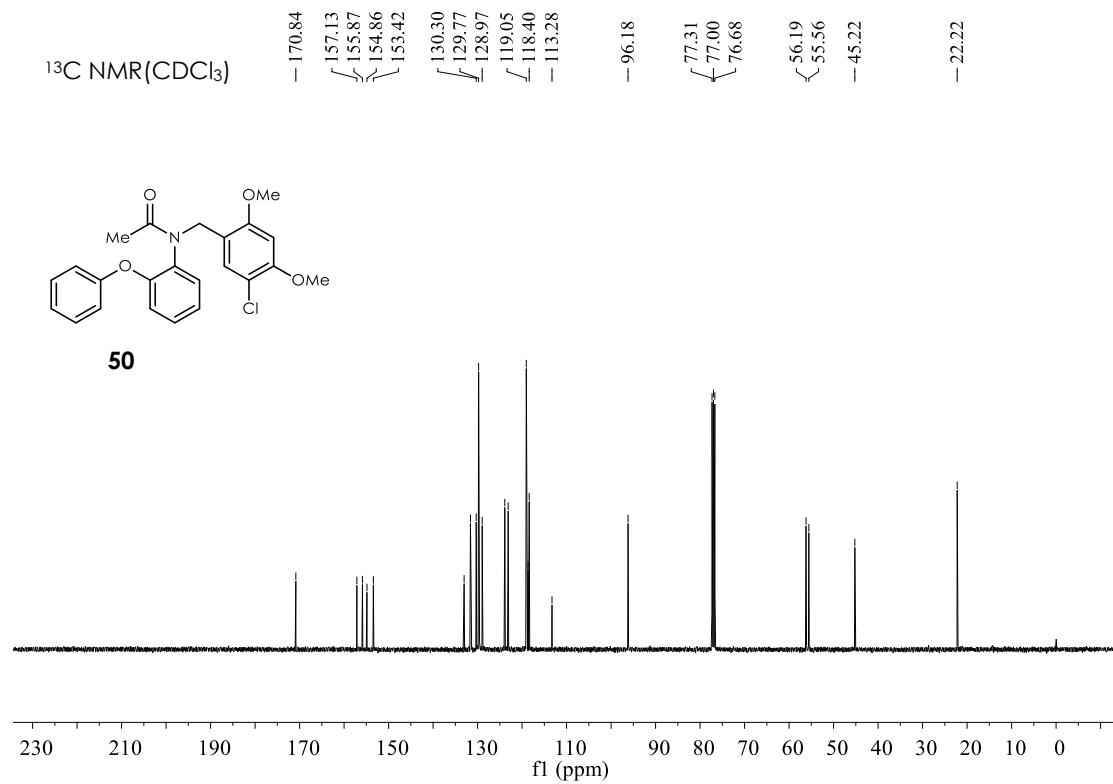



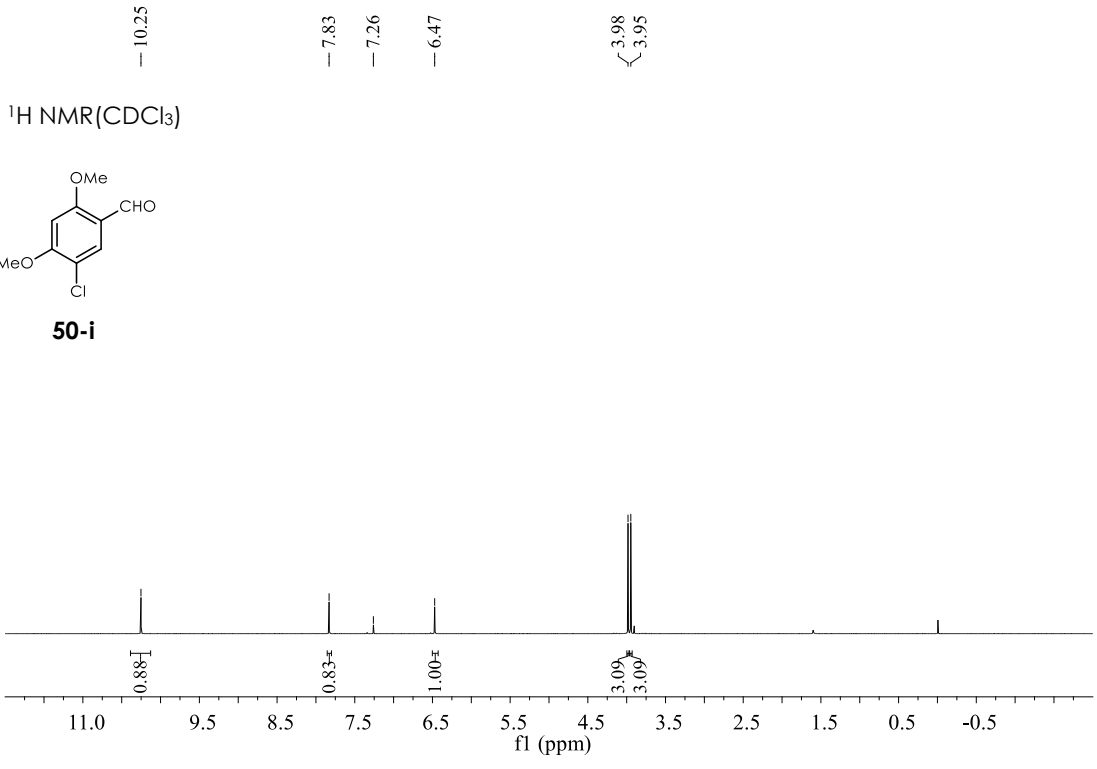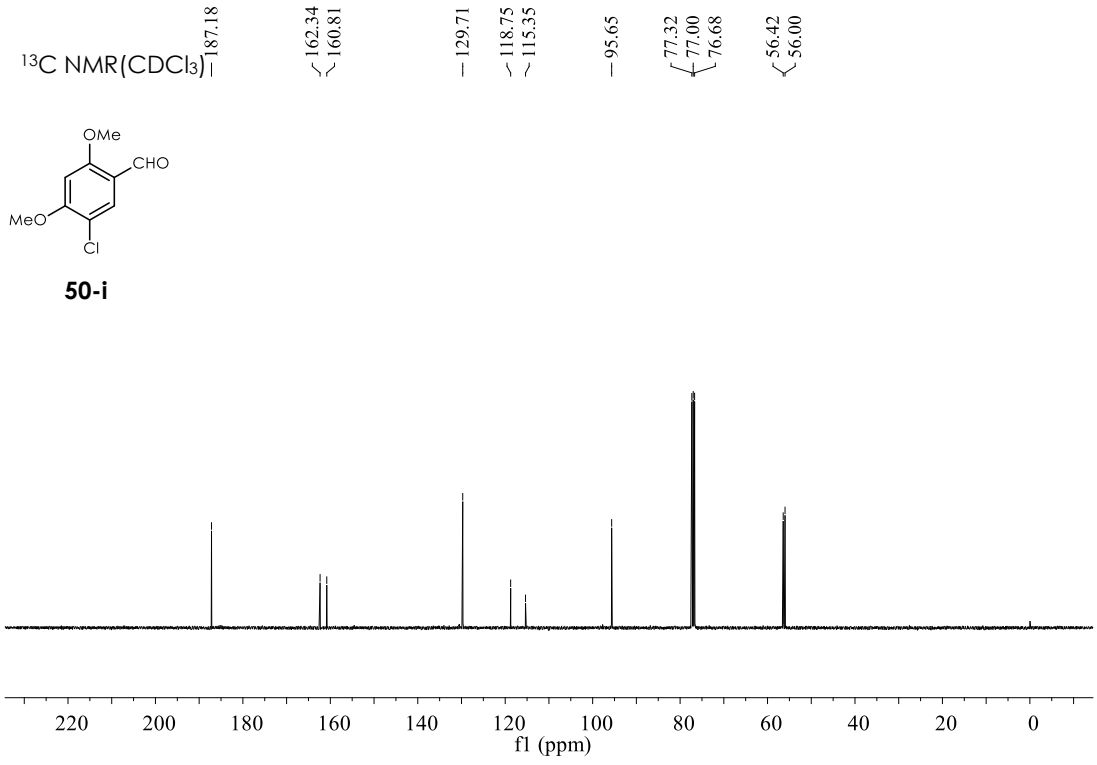

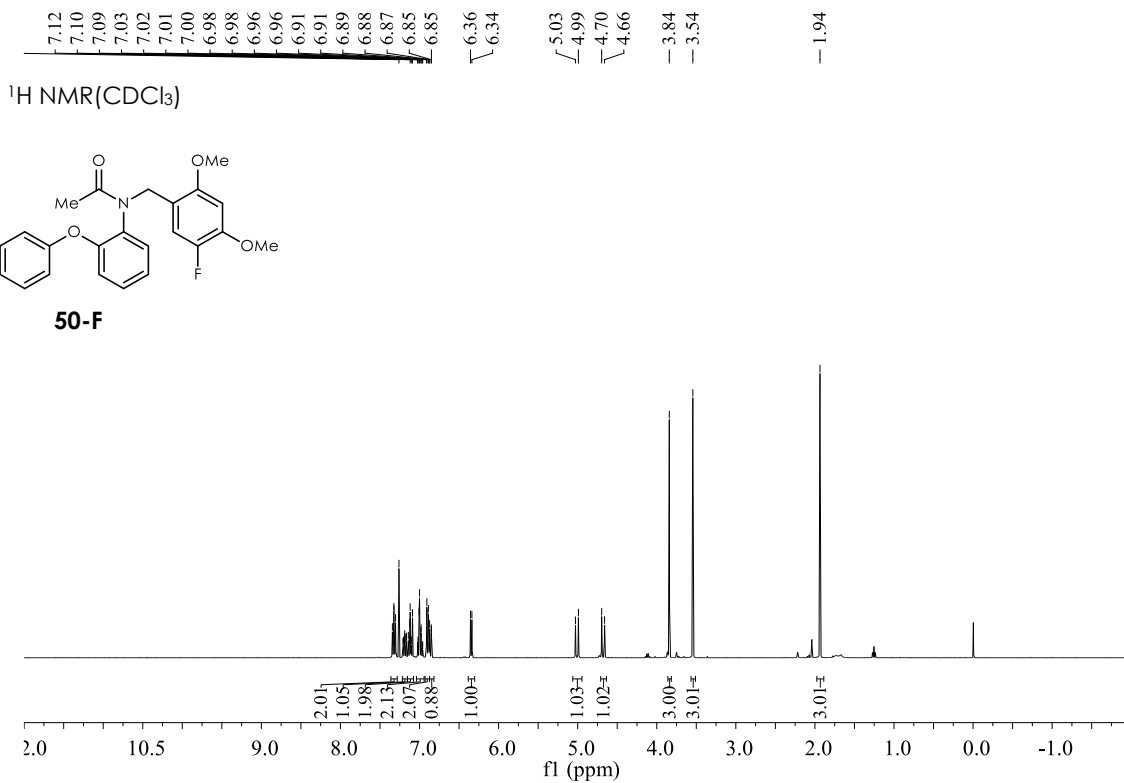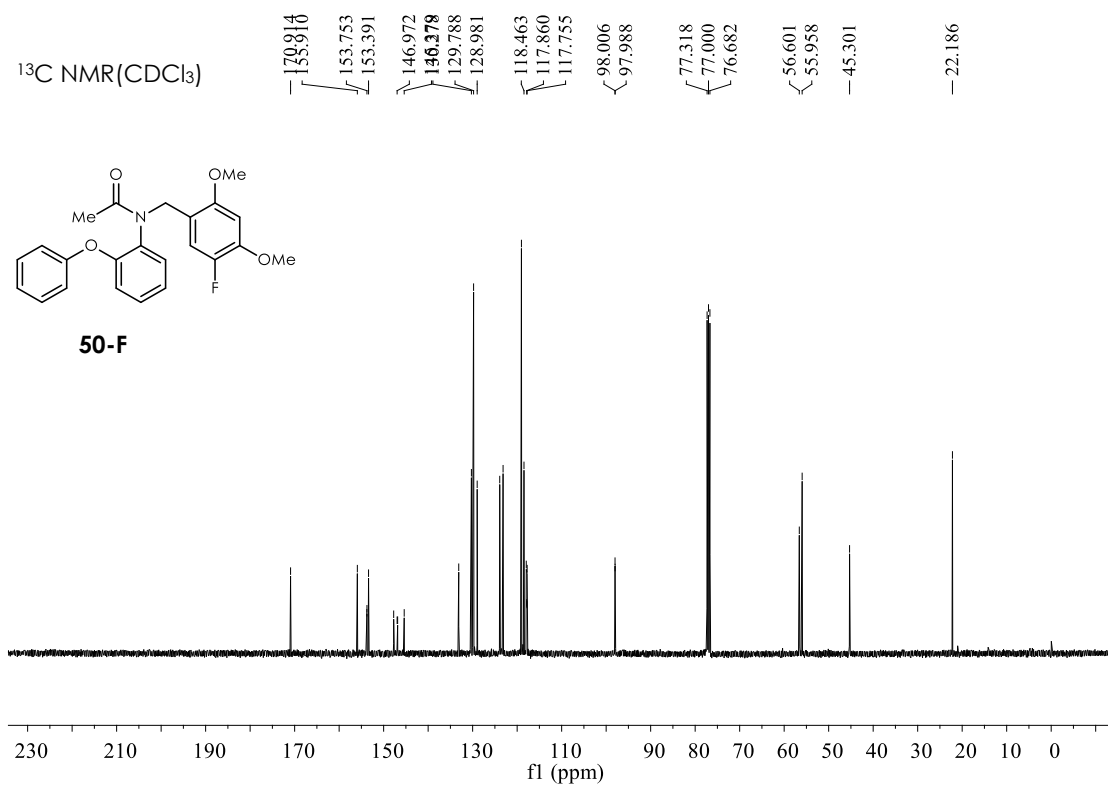

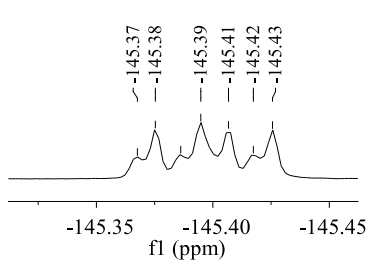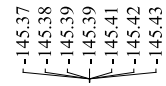

$^{19}\text{F}$  NMR( $\text{CDCl}_3$ )

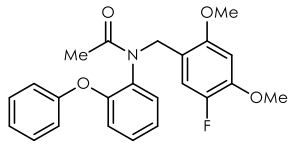

**50-F**

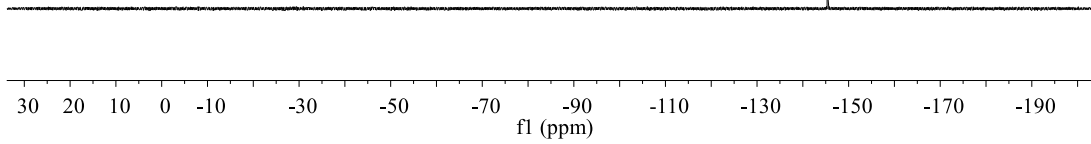

10.28  
10.27

7.55  
7.52  
7.26

6.52  
6.50

3.97  
3.93

$^1\text{H}$  NMR( $\text{CDCl}_3$ )

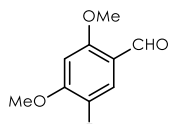

**50-F-i**

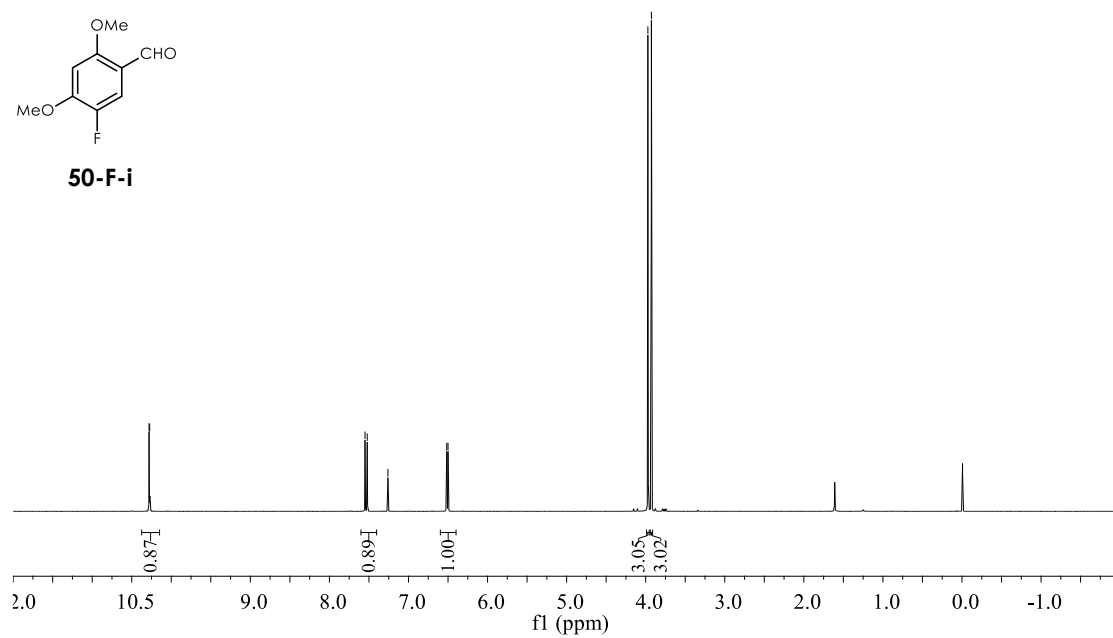

<sup>13</sup>C NMR(CDCl<sub>3</sub>)

188.78  
188.75

157.26  
157.24  
150.62  
149.50  
148.22

122.28  
122.07  
119.18  
119.17  
105.90  
105.83

77.32  
77.00  
76.68

62.28  
62.21  
56.31

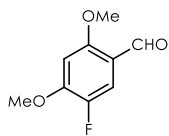

50-F-i

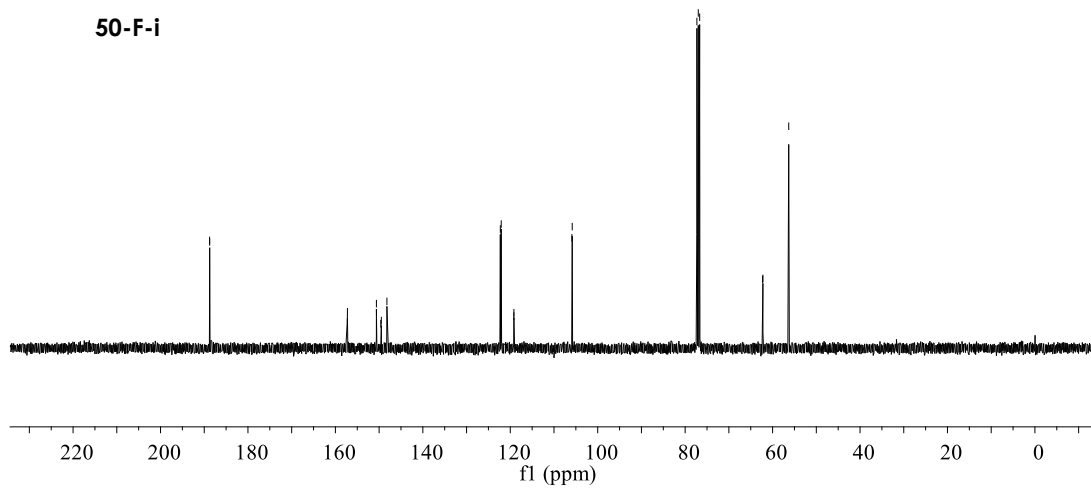

-144.44  
-144.44  
-144.45  
-144.46  
-144.47  
-144.47  
-144.48  
-144.49

-144.44  
-144.44  
-144.45  
-144.46  
-144.47  
-144.47  
-144.48  
-144.49

-144.36

-144.46  
f1 (ppm)

<sup>19</sup>F NMR(CDCl<sub>3</sub>)

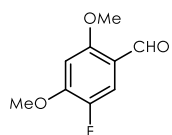

50-F-i

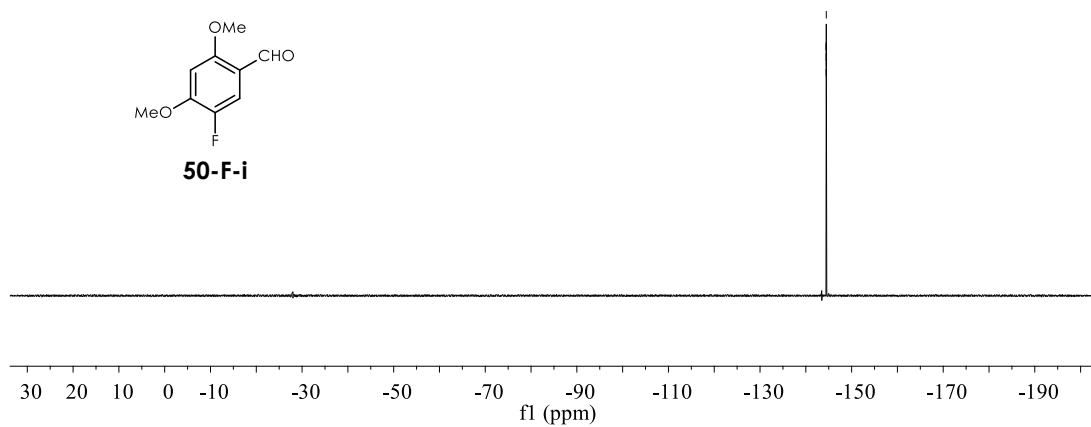

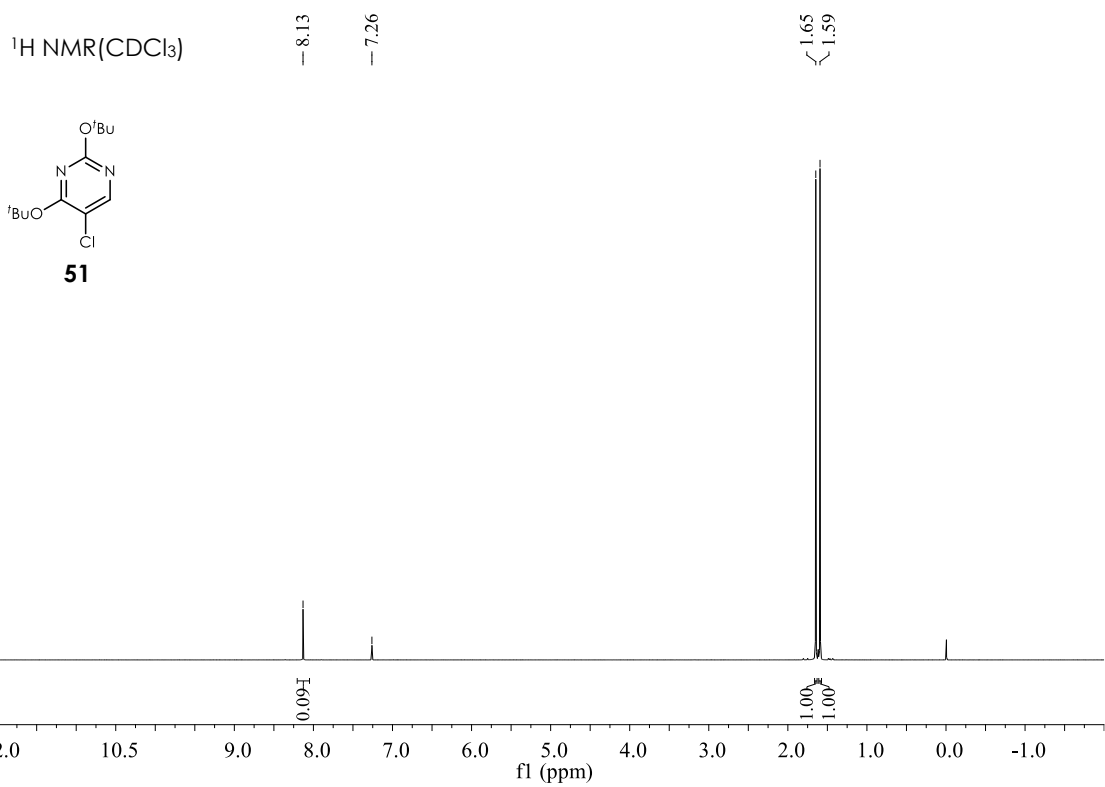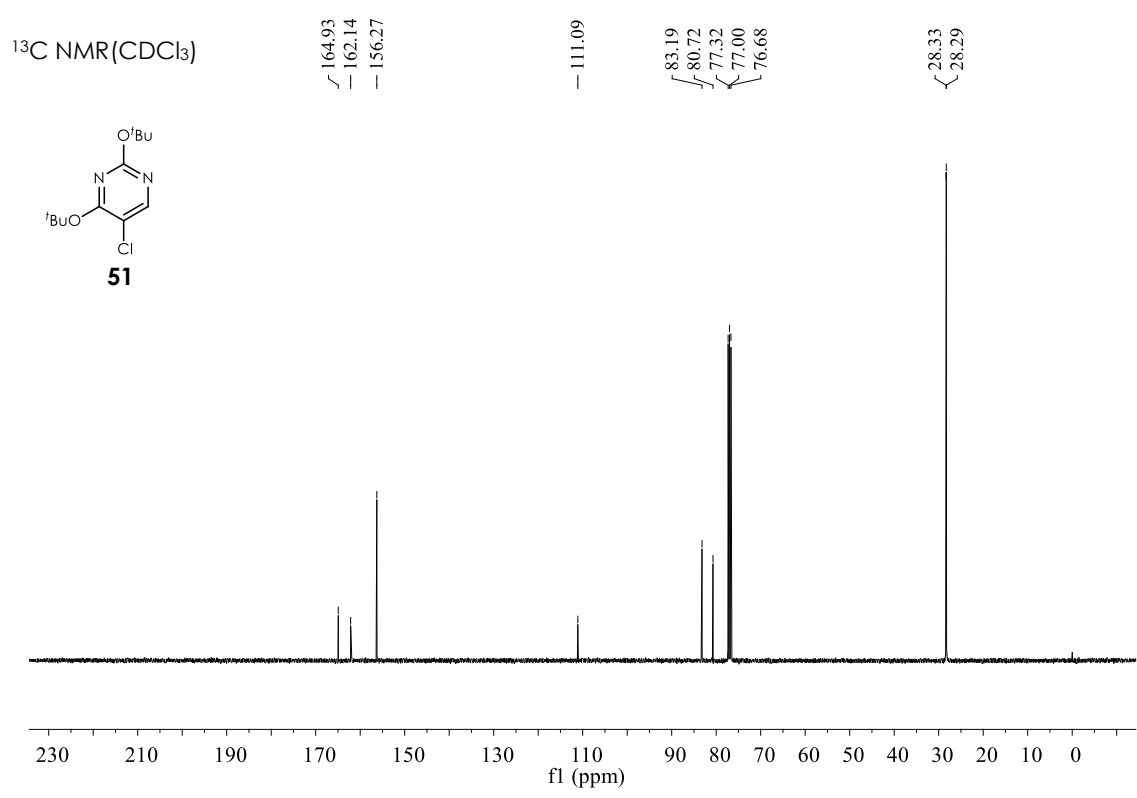

<sup>1</sup>H NMR(CDCl<sub>3</sub>)

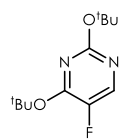

**53-F**

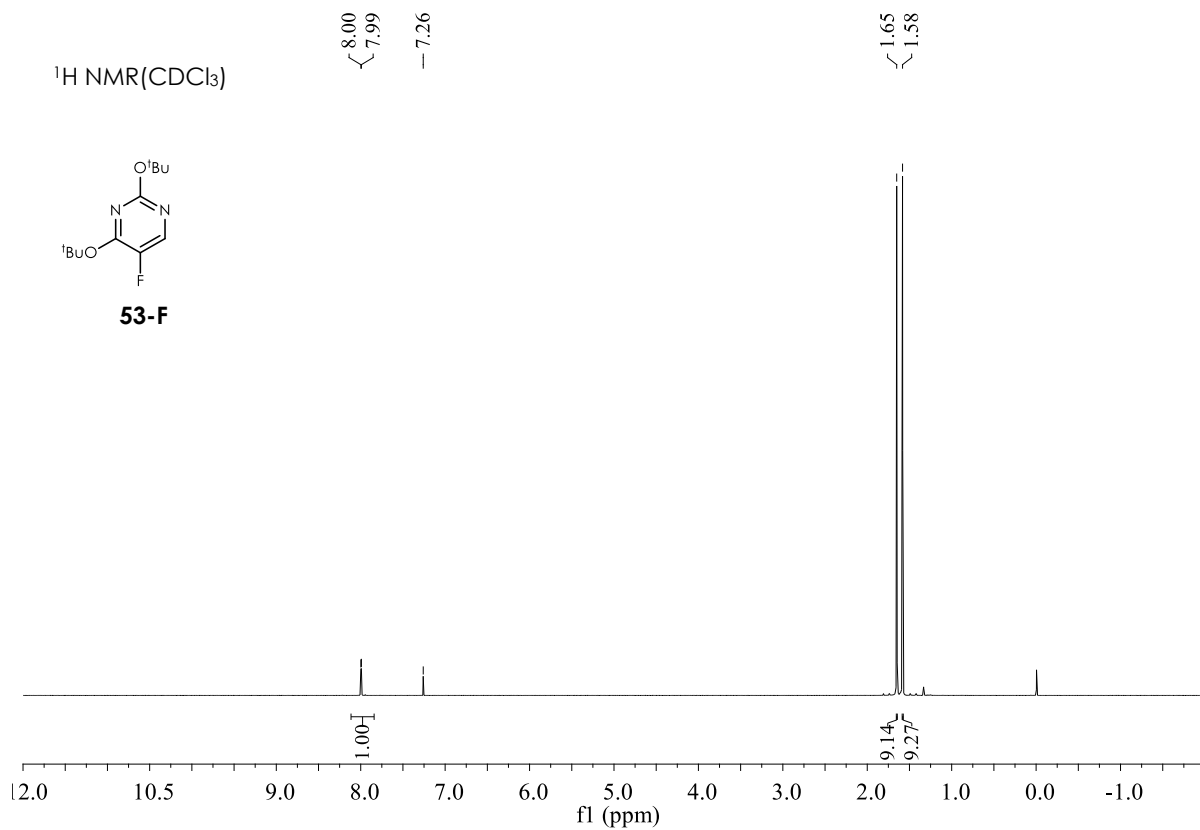

<sup>13</sup>C NMR(CDCl<sub>3</sub>)

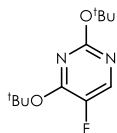

**53-F**

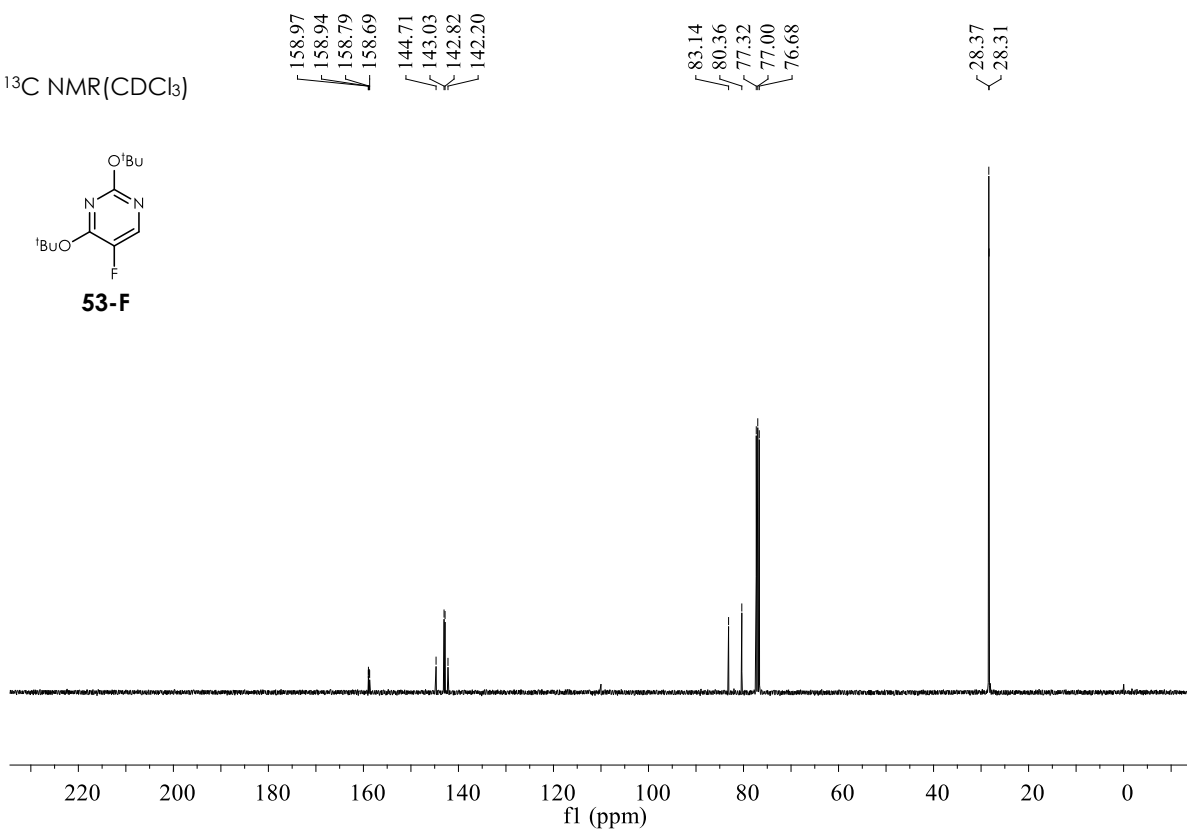

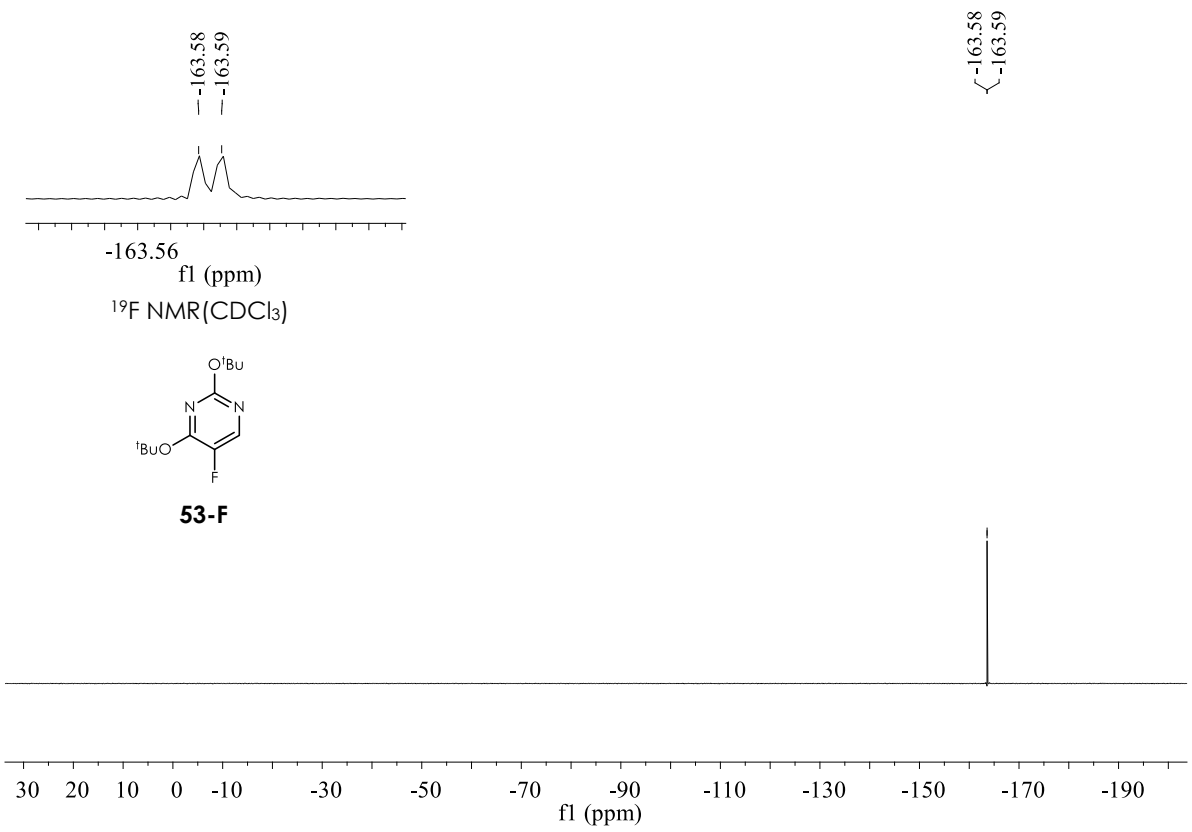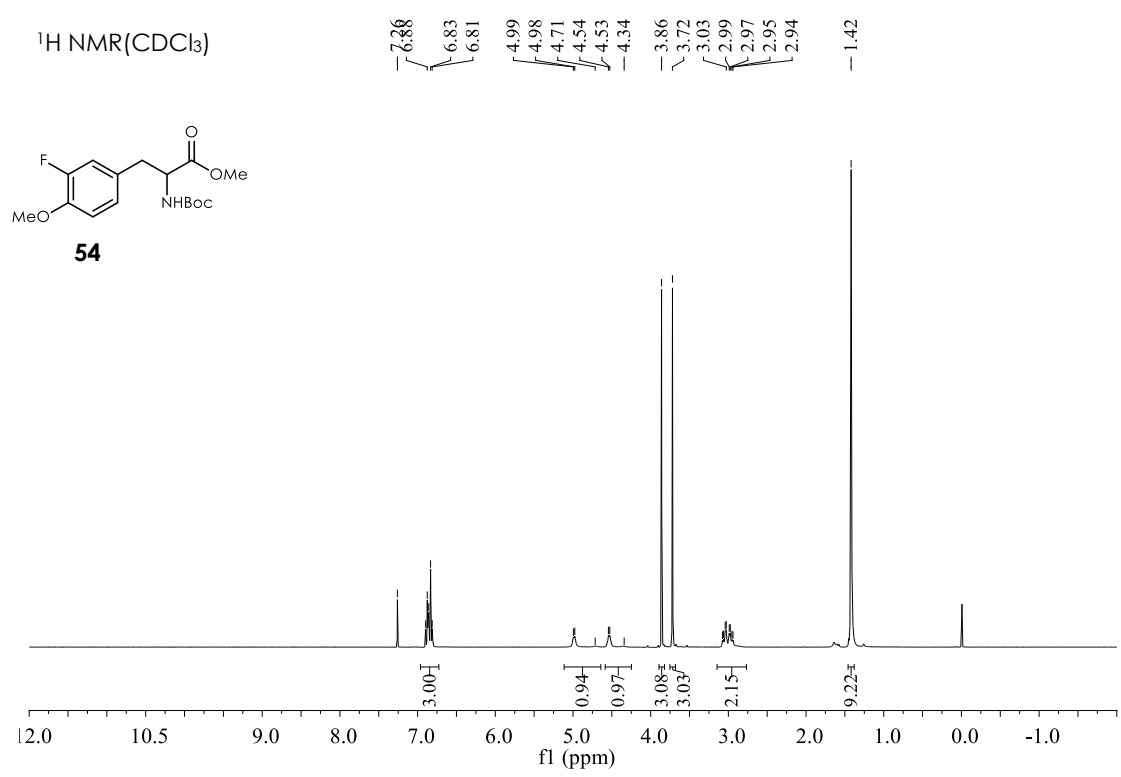

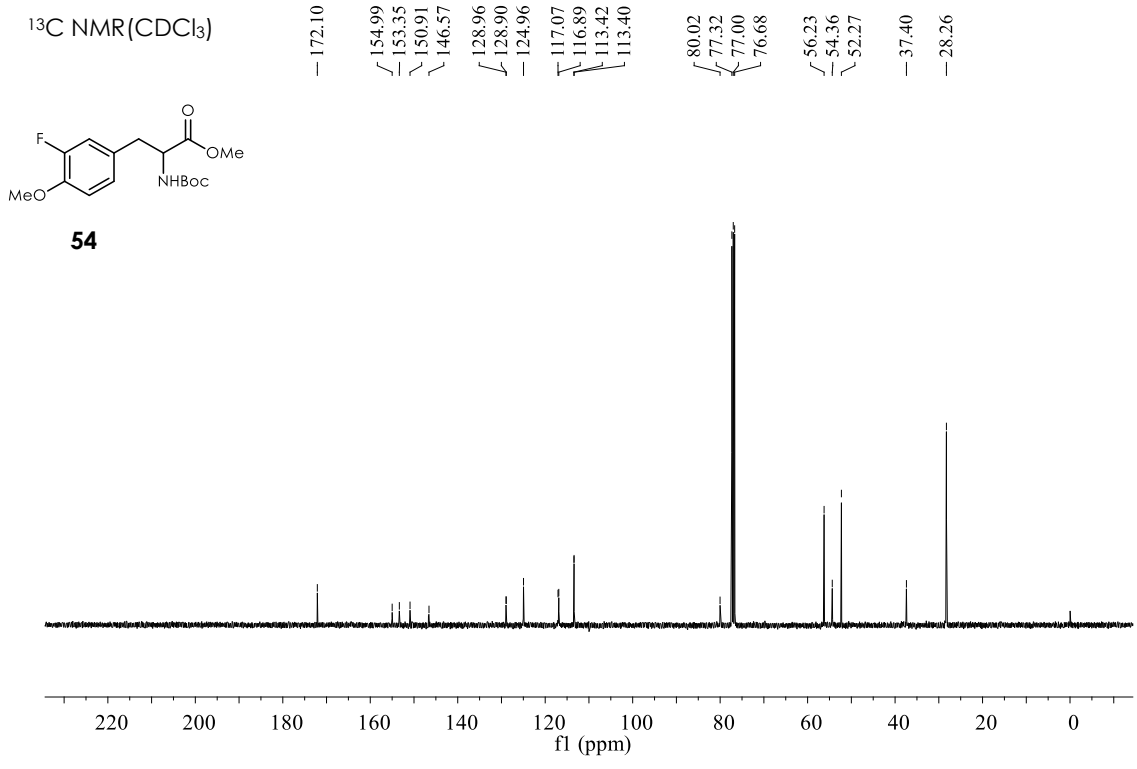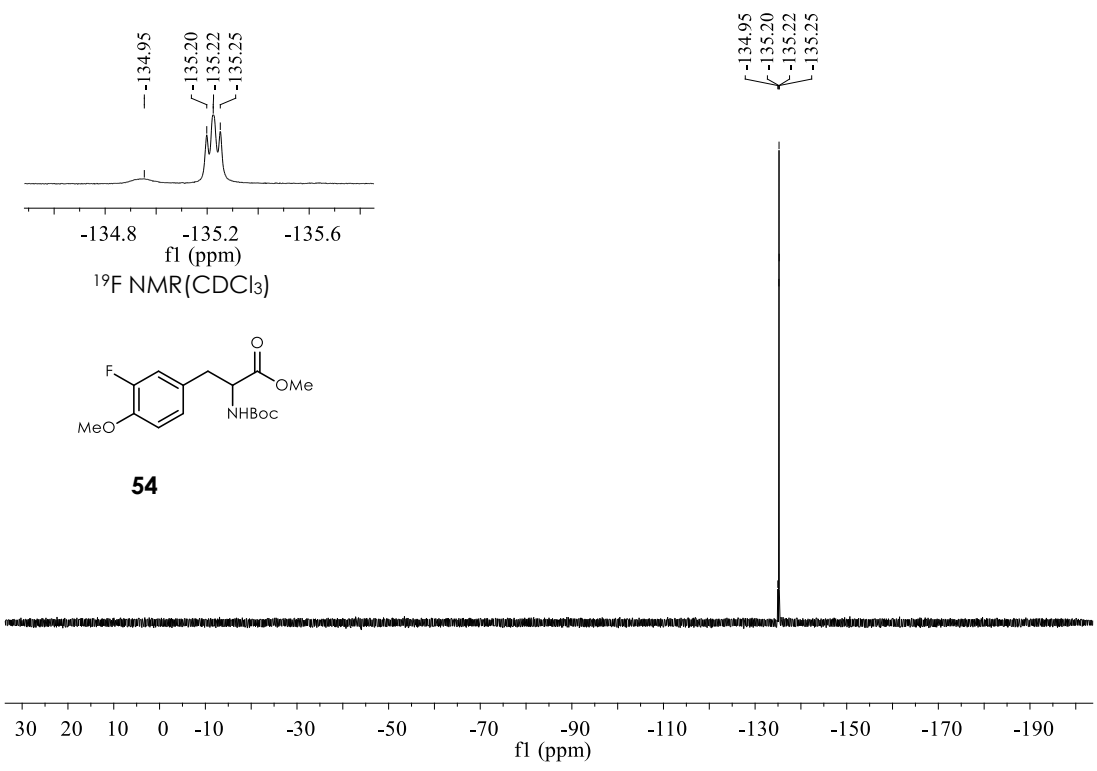



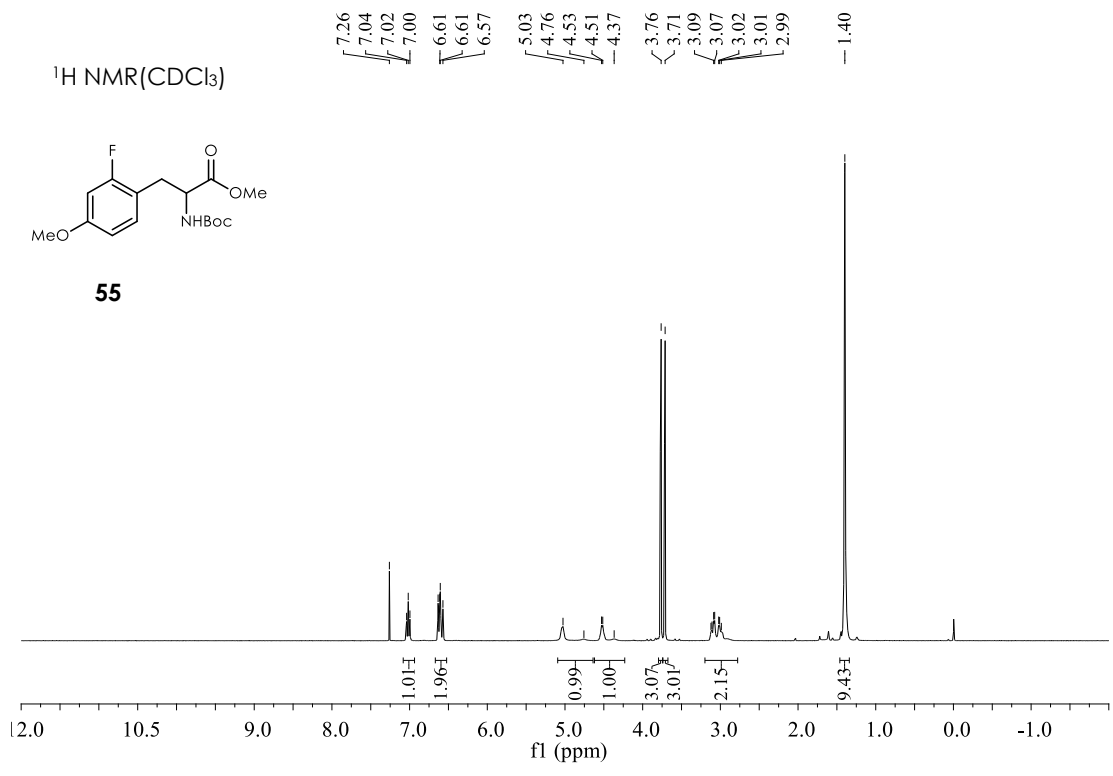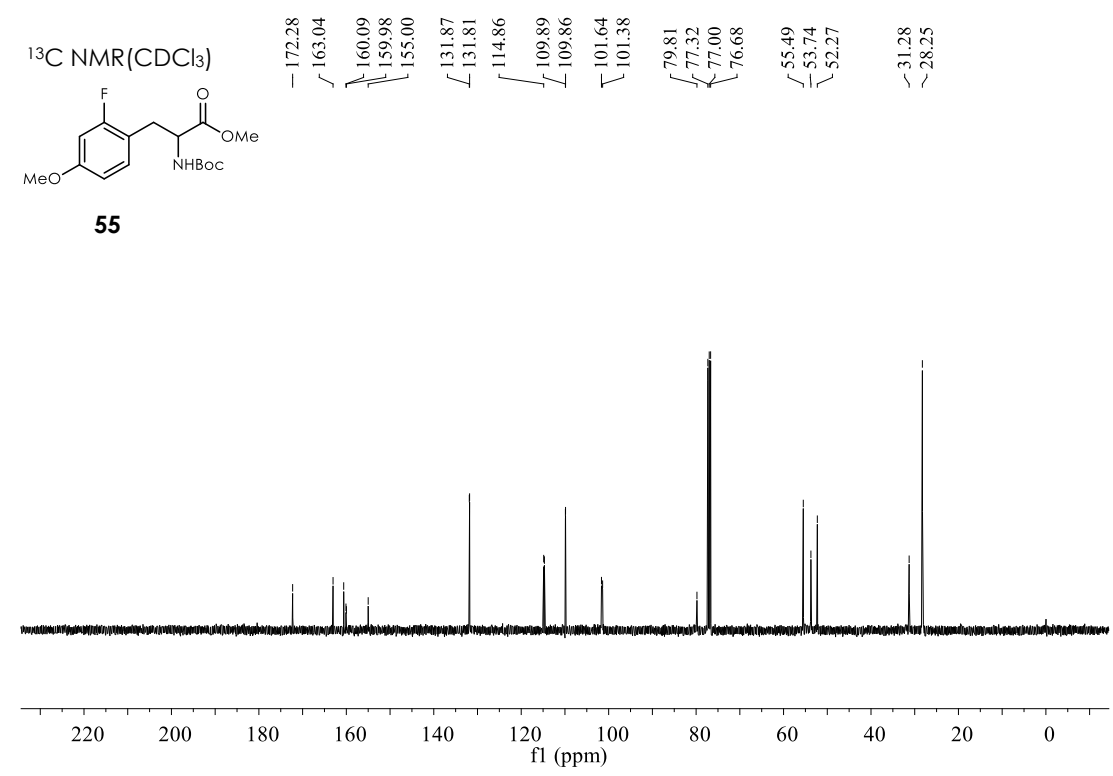

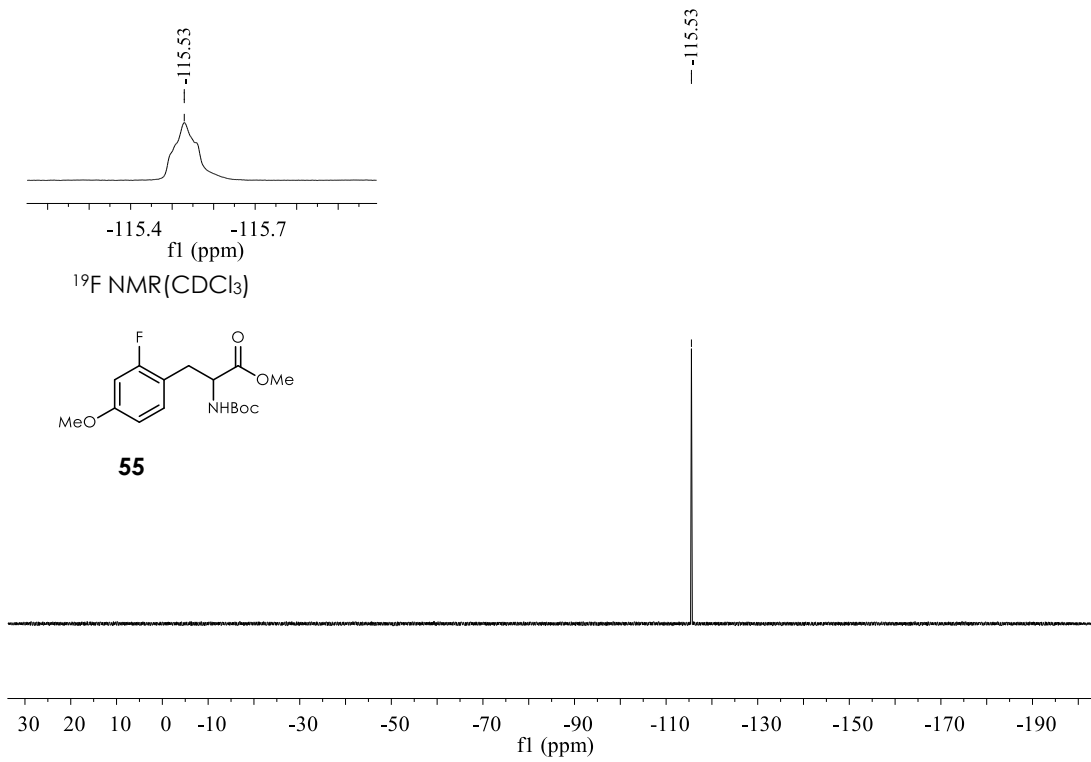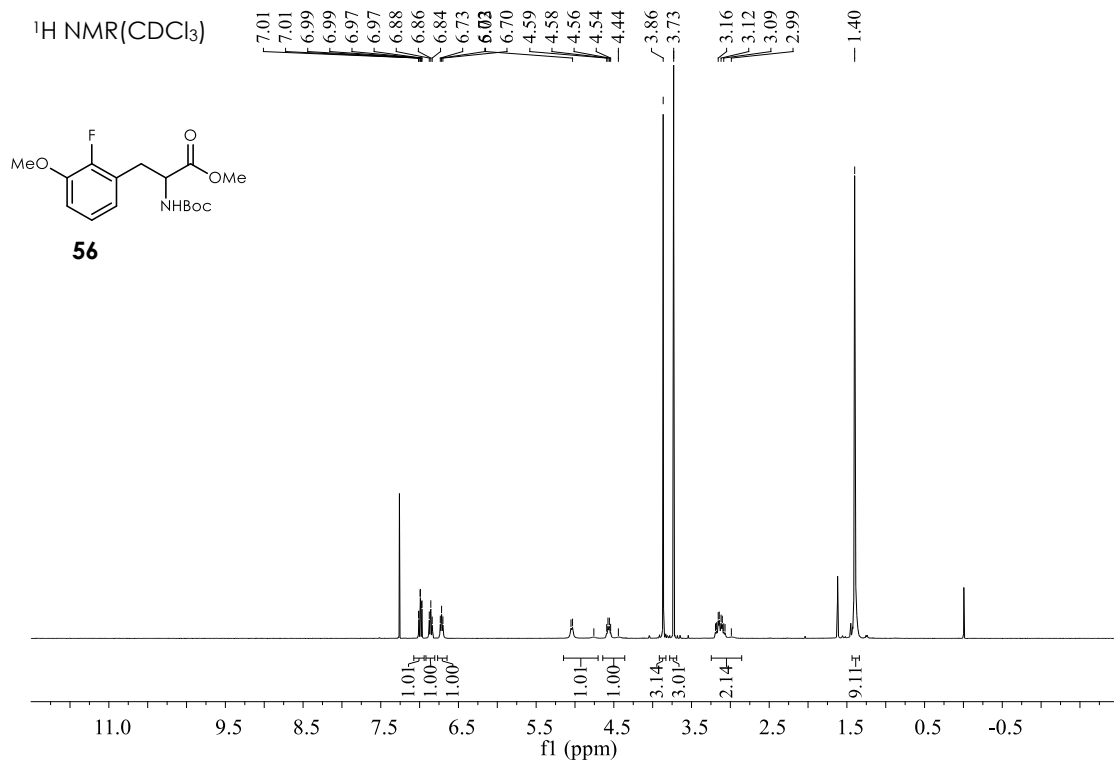

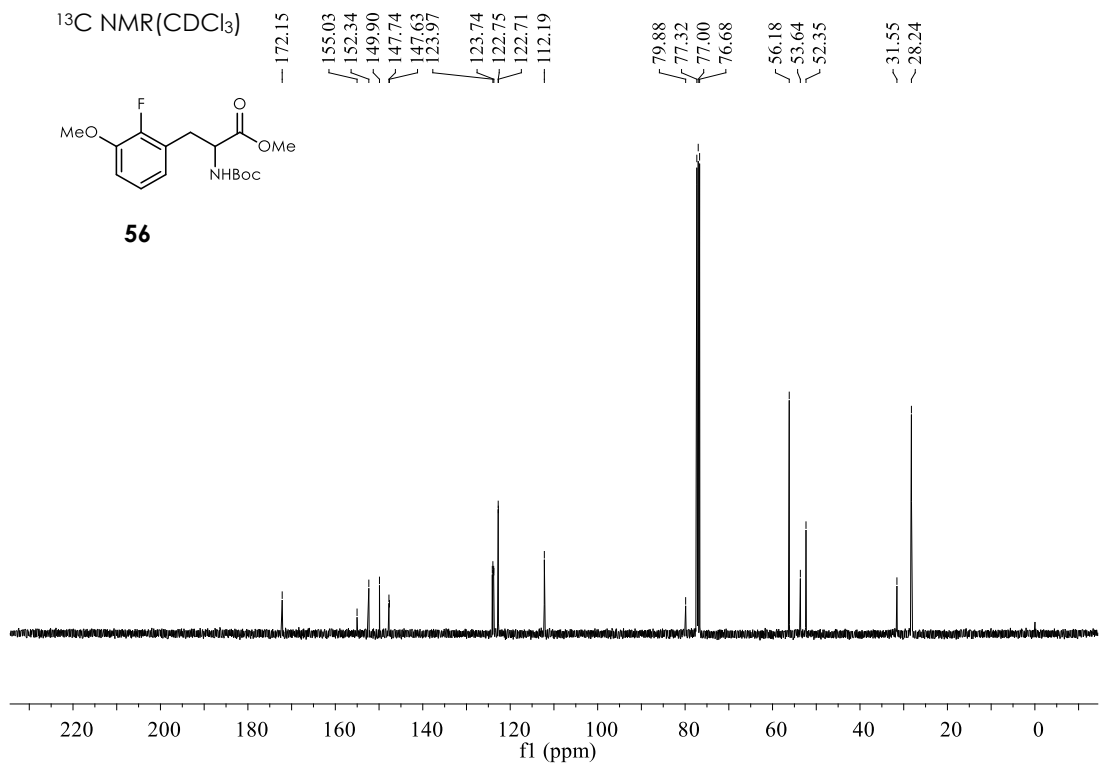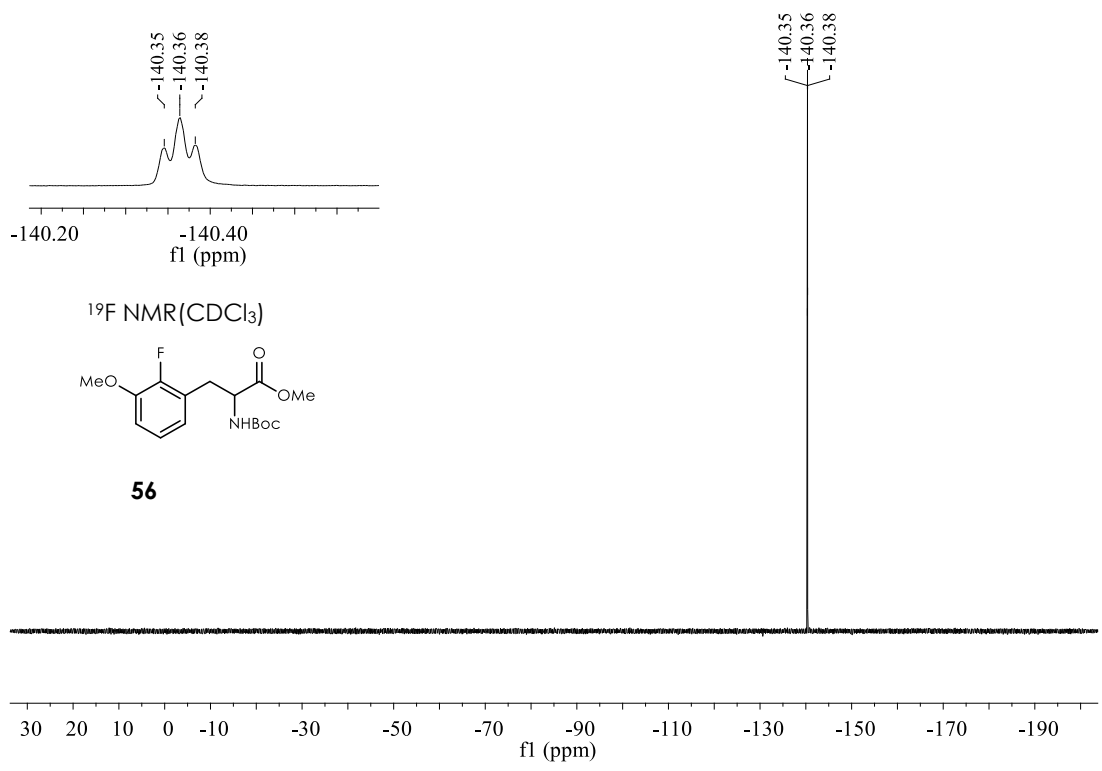

<sup>1</sup>H NMR(CDCl<sub>3</sub>)

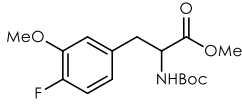

**57**

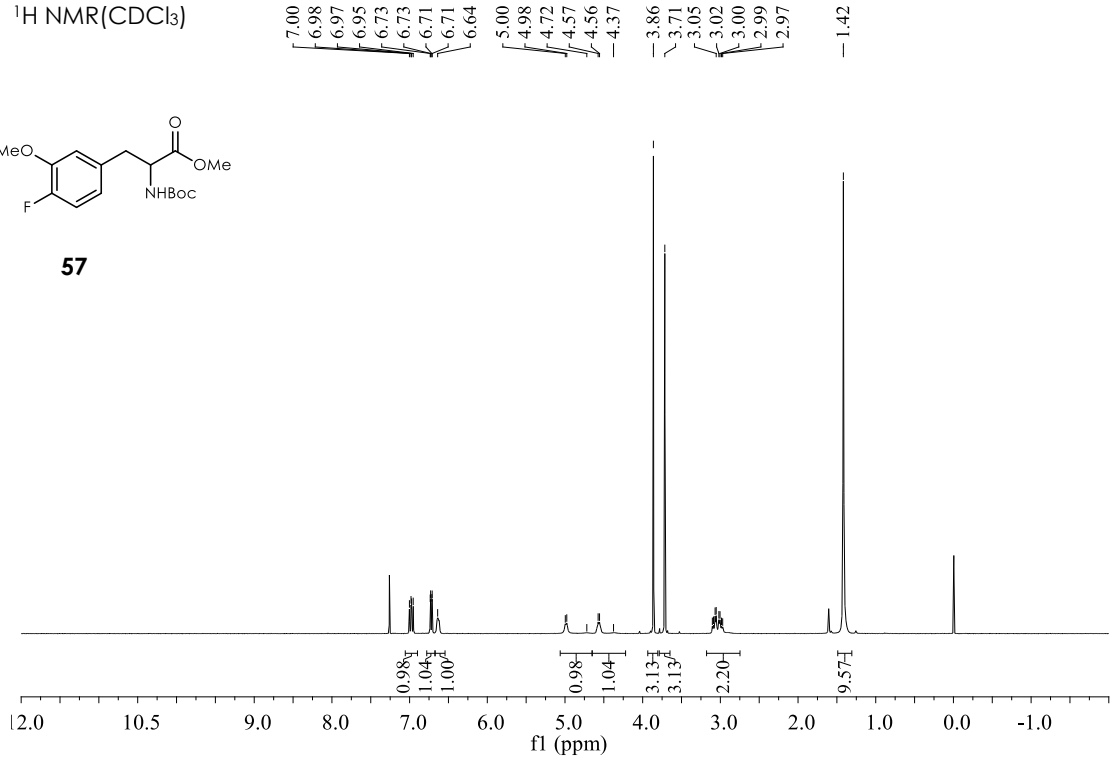

<sup>13</sup>C NMR(CDCl<sub>3</sub>)

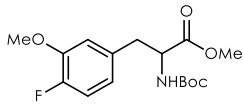

**57**

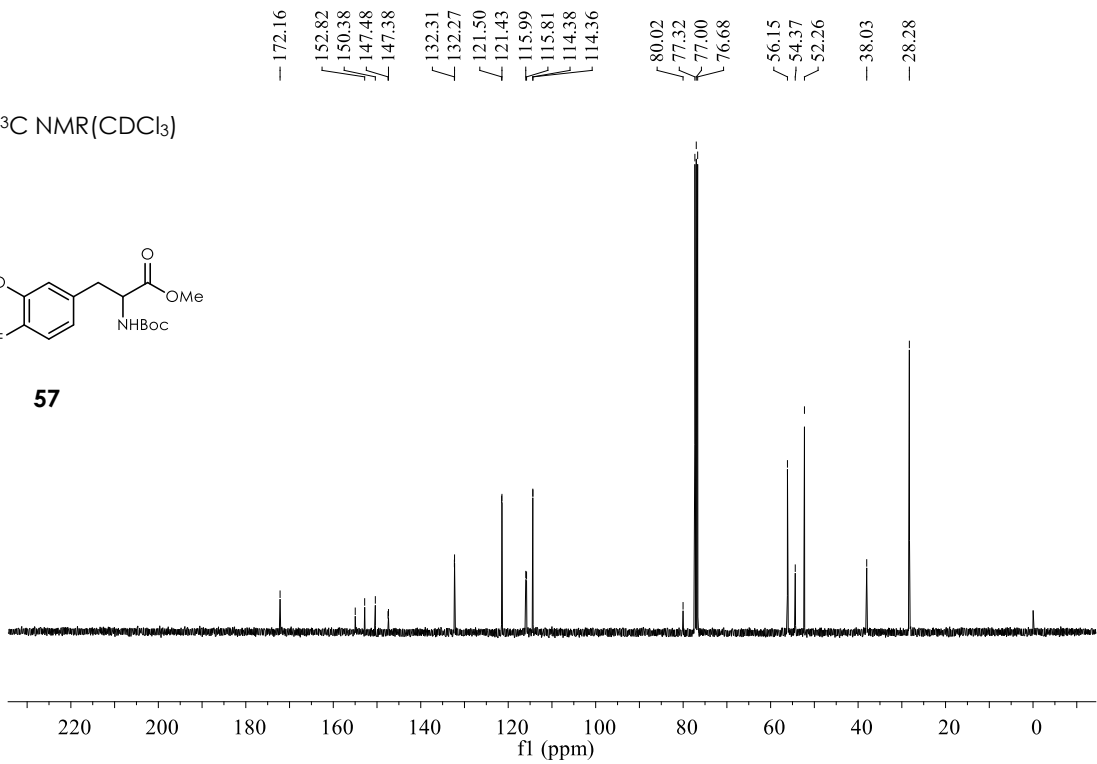

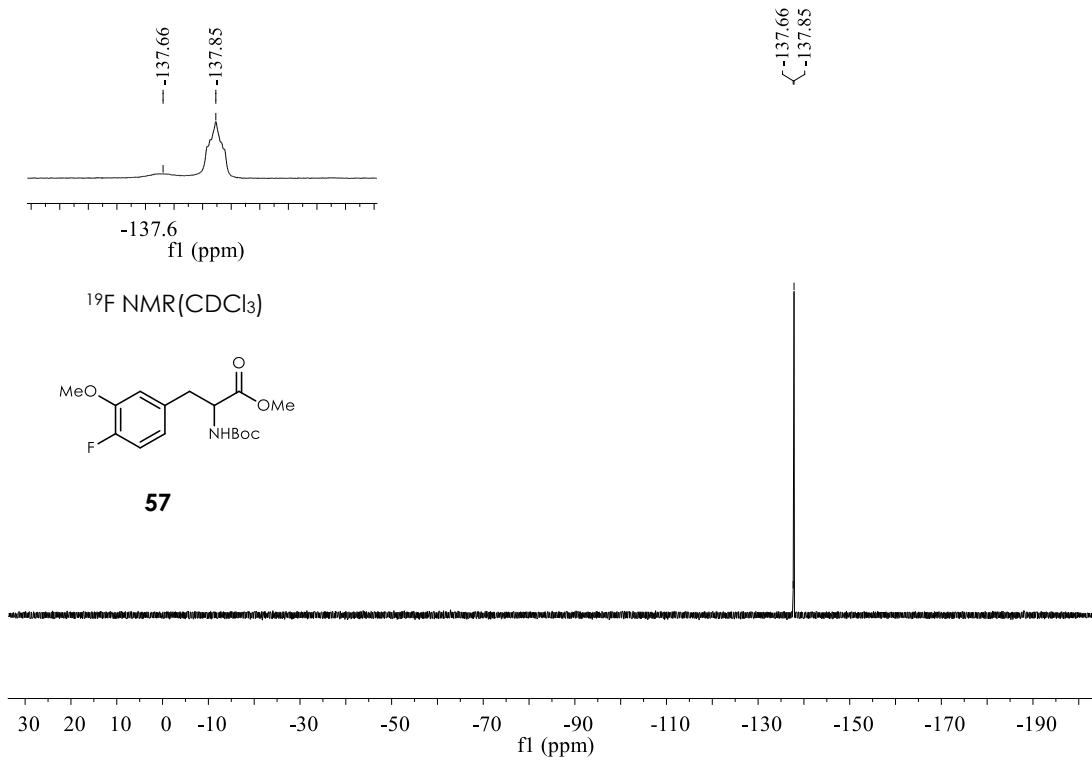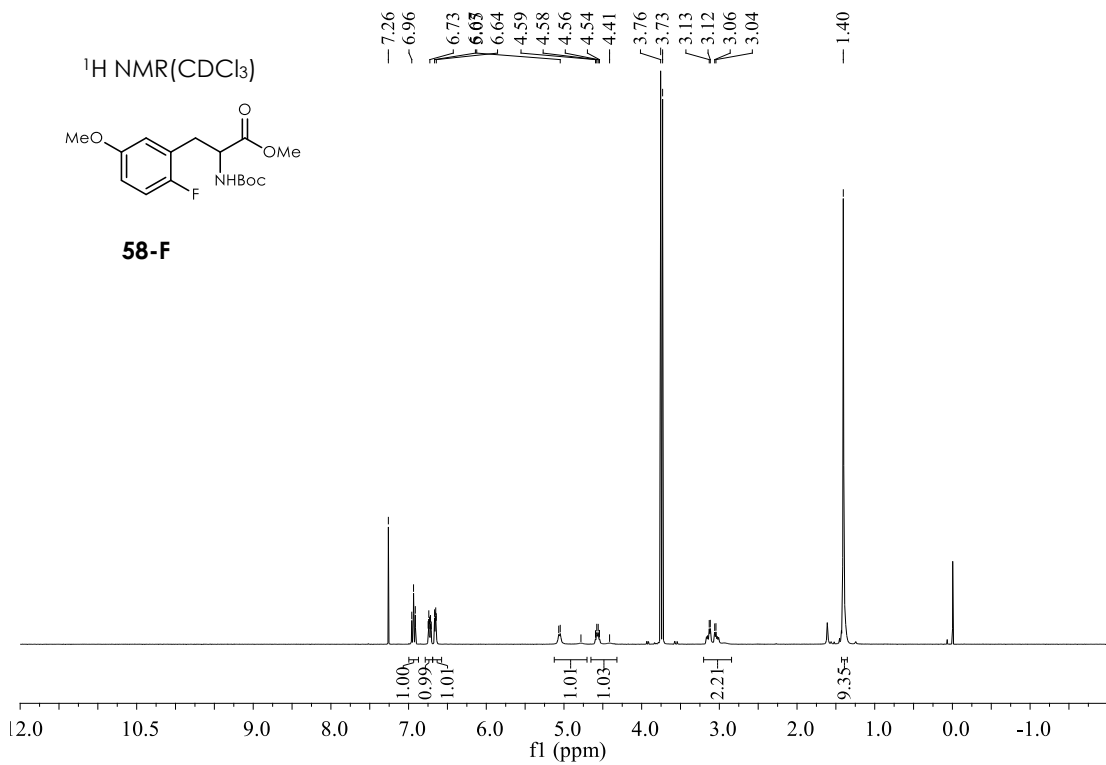

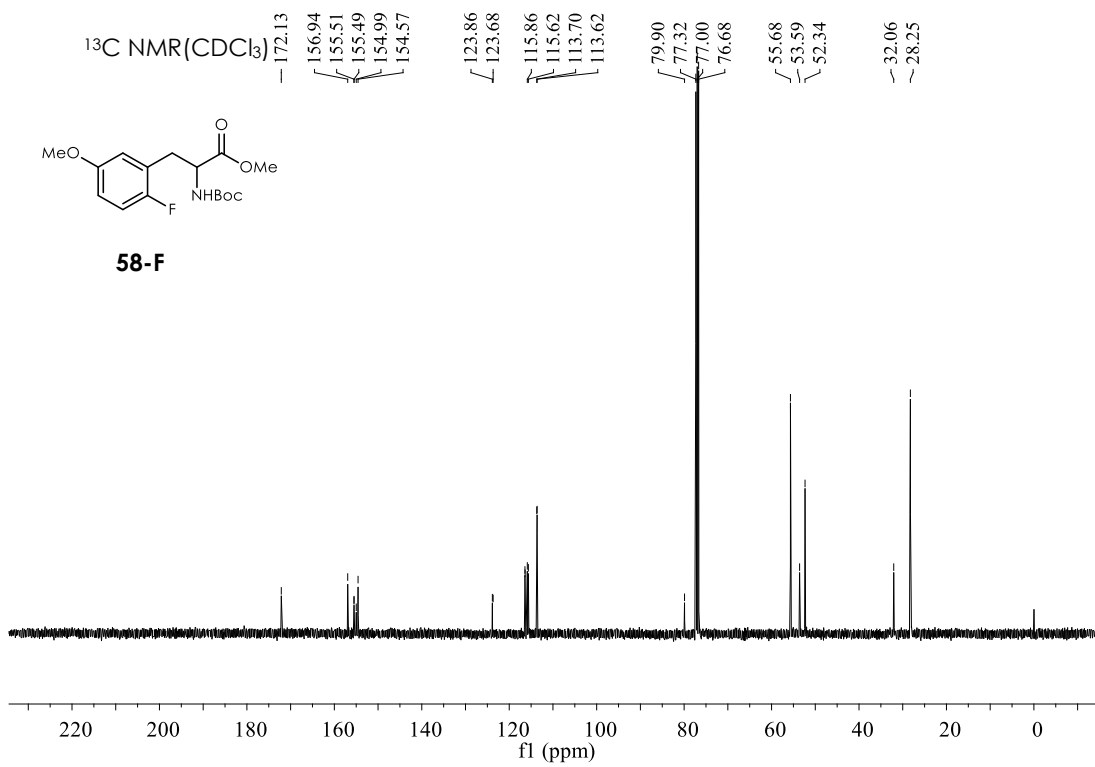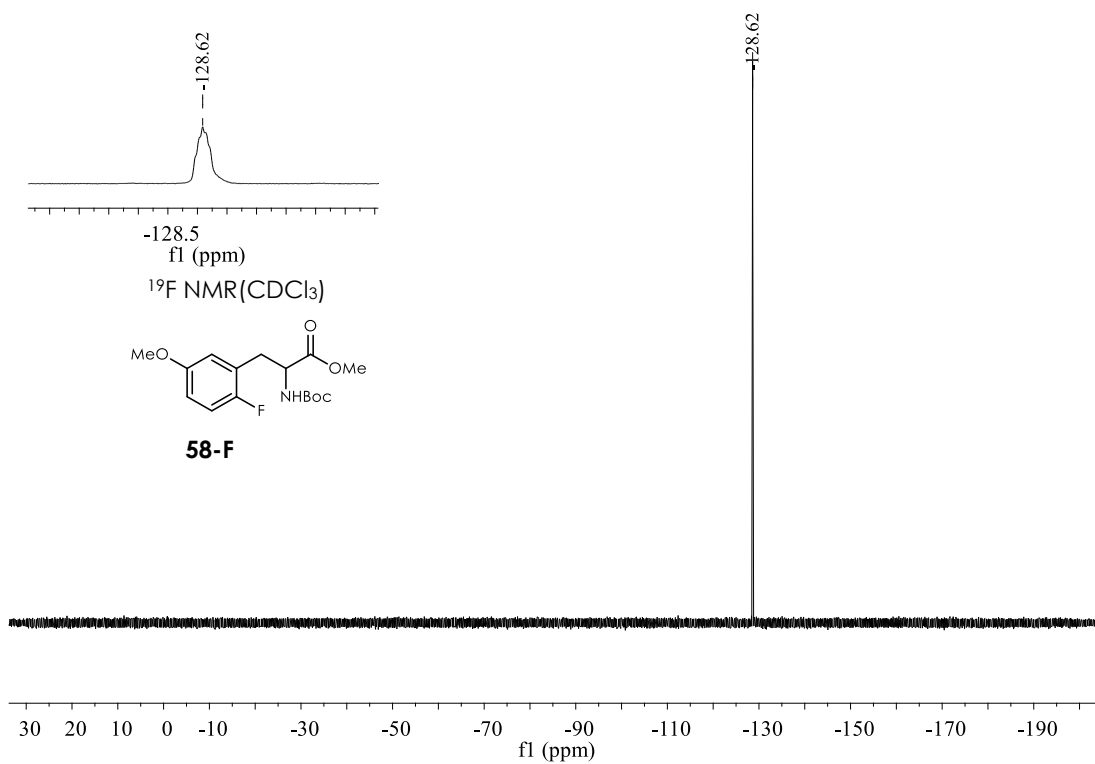

<sup>1</sup>H NMR(CDCl<sub>3</sub>)

7.26  
7.22  
7.20  
7.18  
6.80  
6.72  
6.66  
4.99  
4.97  
4.57  
3.78  
3.72  
3.11  
3.10  
3.08  
3.06  
3.05  
3.03  
3.01  
3.00  
2.91

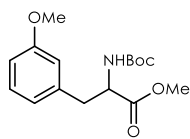

**58-Cl-i**

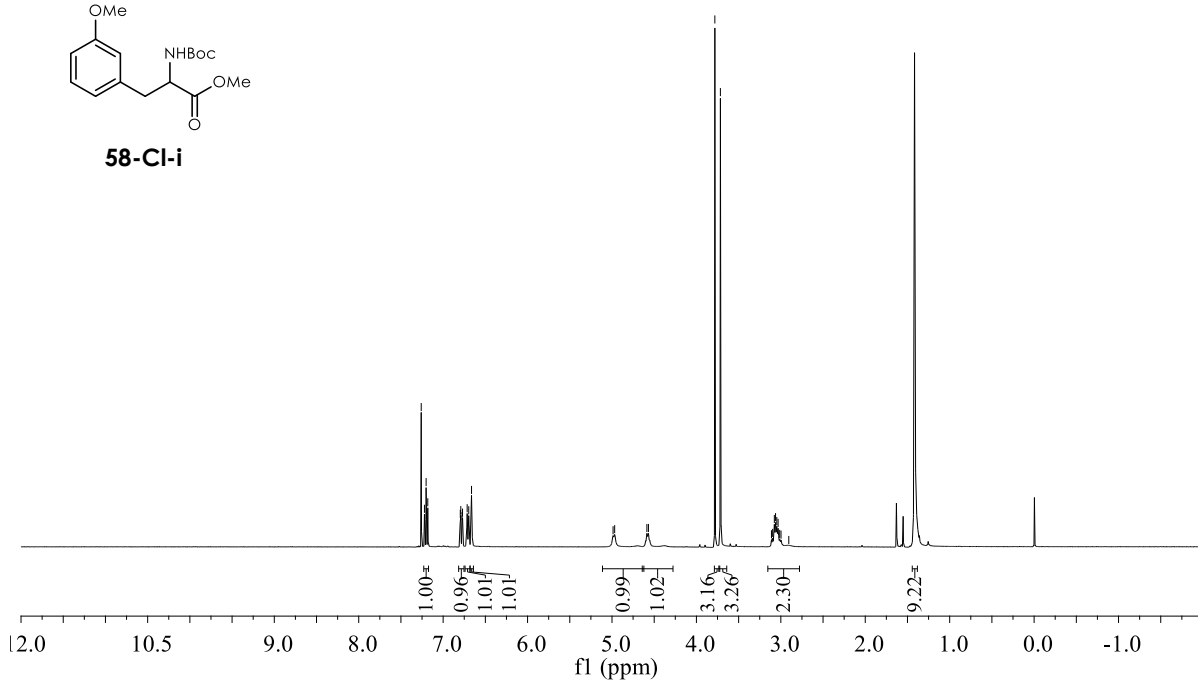

<sup>13</sup>C NMR(CDCl<sub>3</sub>)

172.28  
159.64  
155.05  
137.47  
129.50  
121.57  
114.93  
112.44  
79.90  
77.32  
77.00  
76.68  
55.11  
54.31  
52.19  
38.29  
28.27

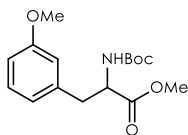

**58-Cl-i**

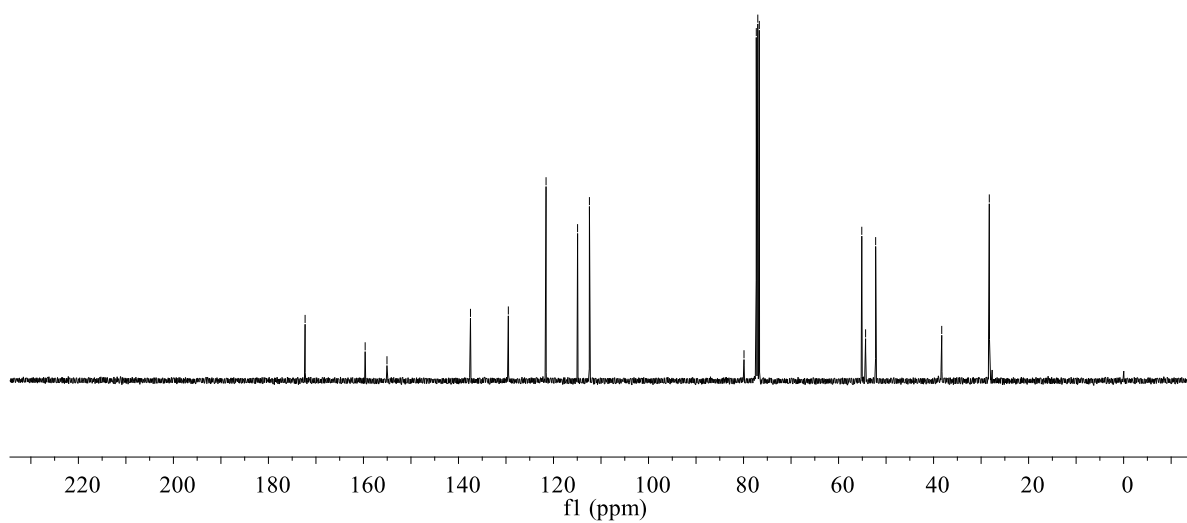

<sup>1</sup>H NMR(CDCl<sub>3</sub>)

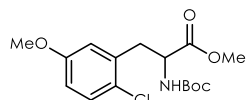

**58-Cl**

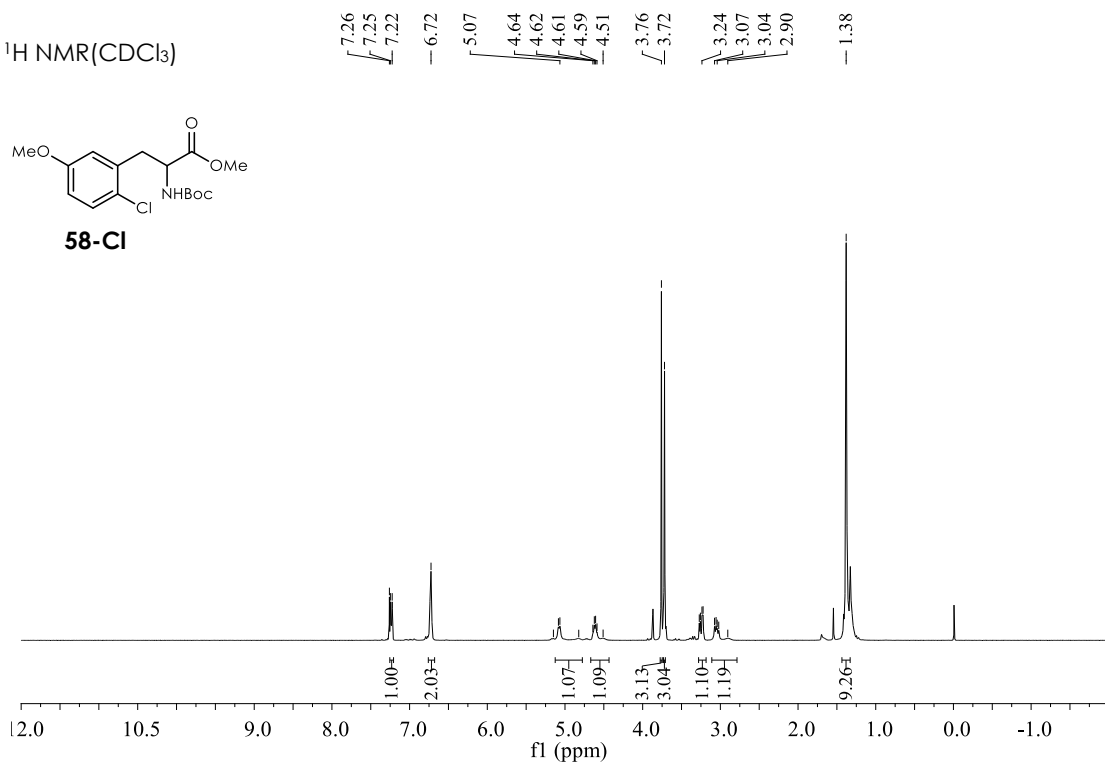

<sup>13</sup>C NMR(CDCl<sub>3</sub>)

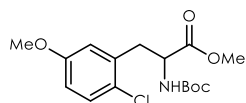

**58-Cl**

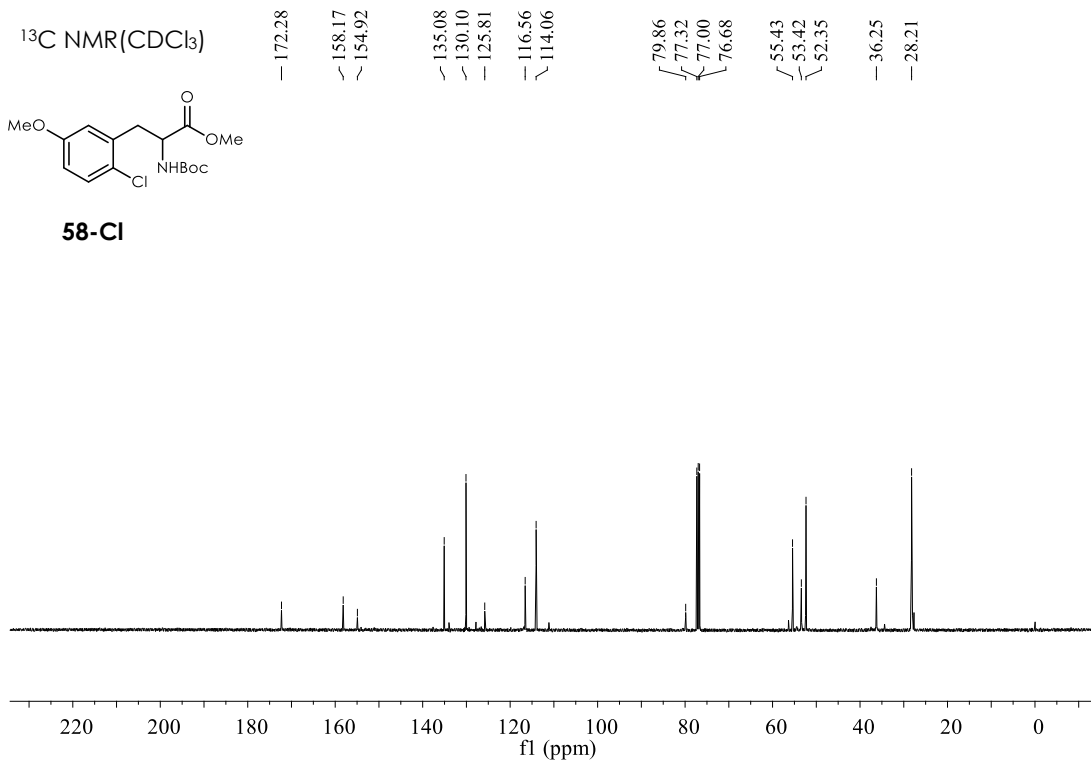



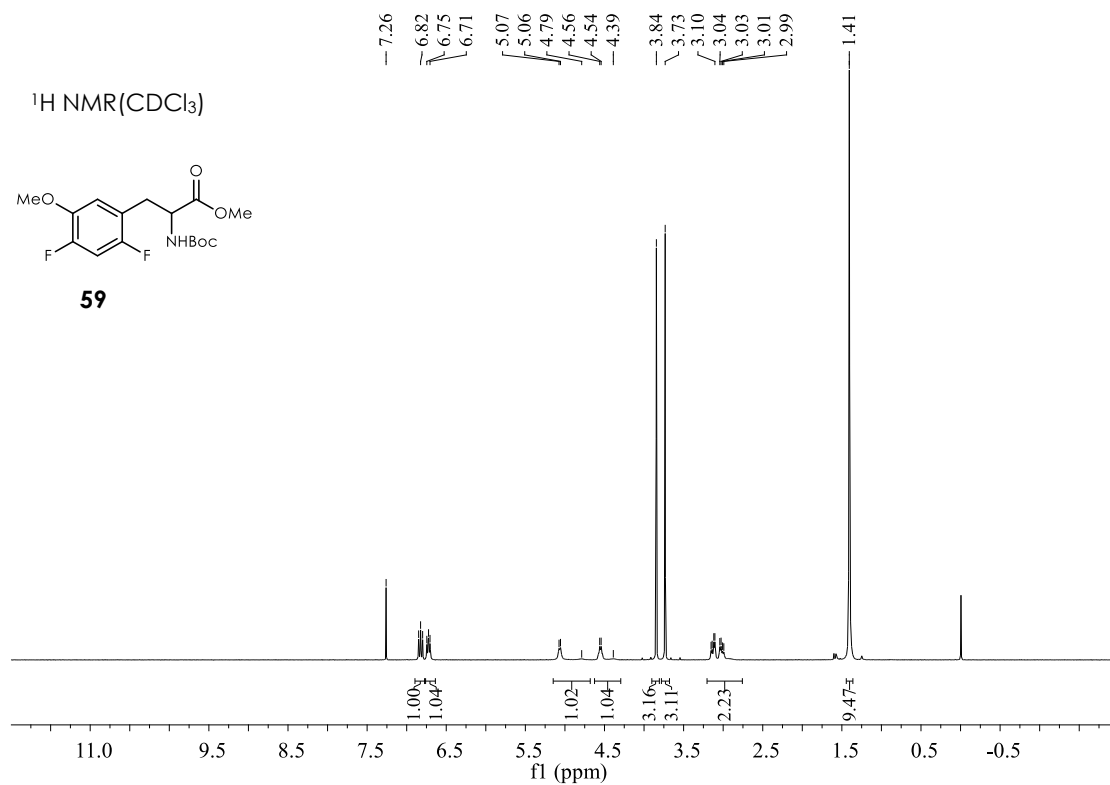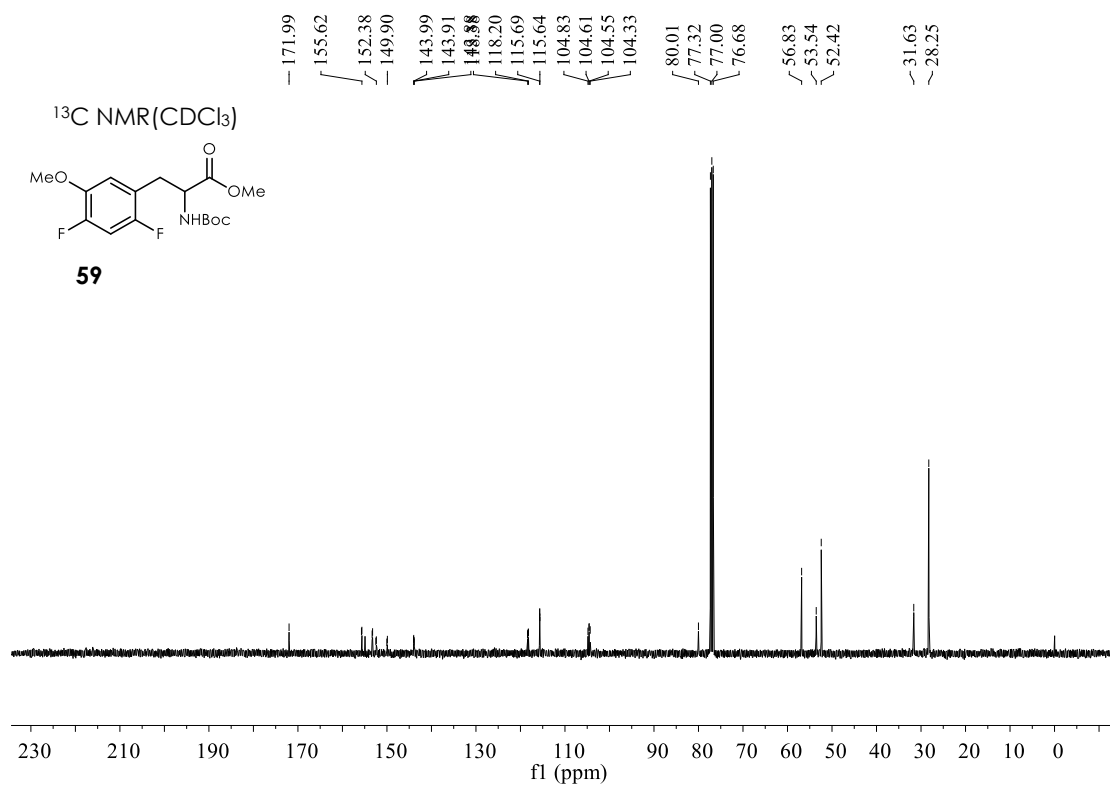

$^{19}\text{F}$  NMR( $\text{CDCl}_3$ )

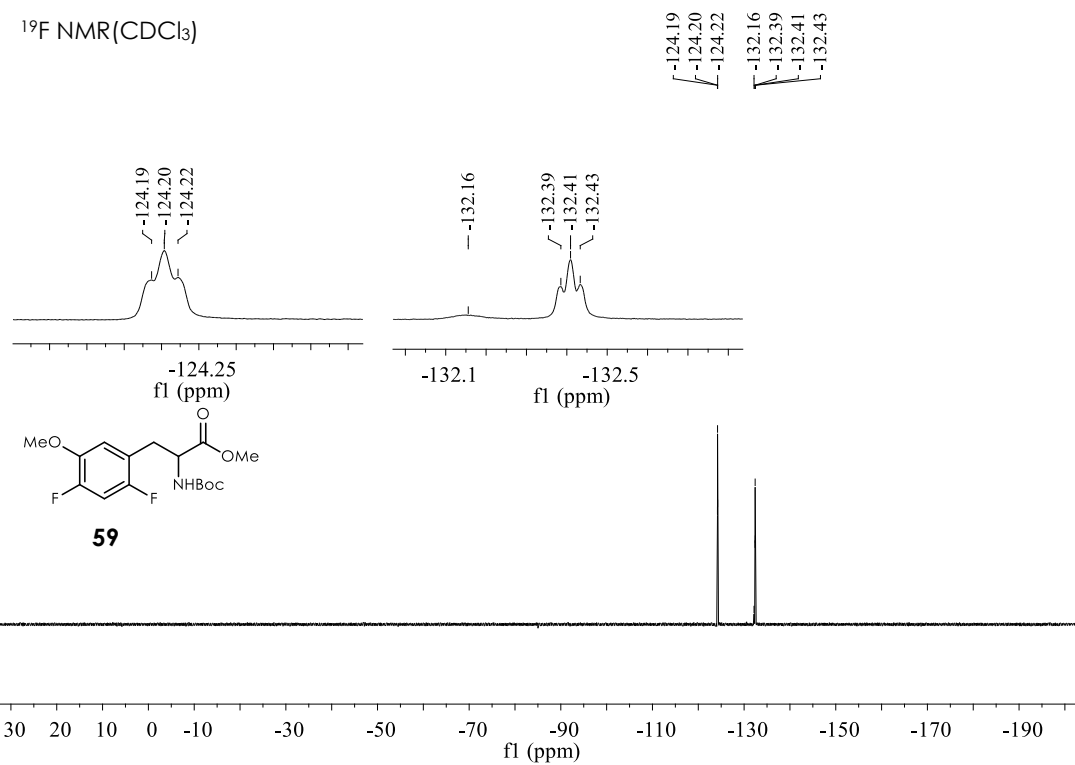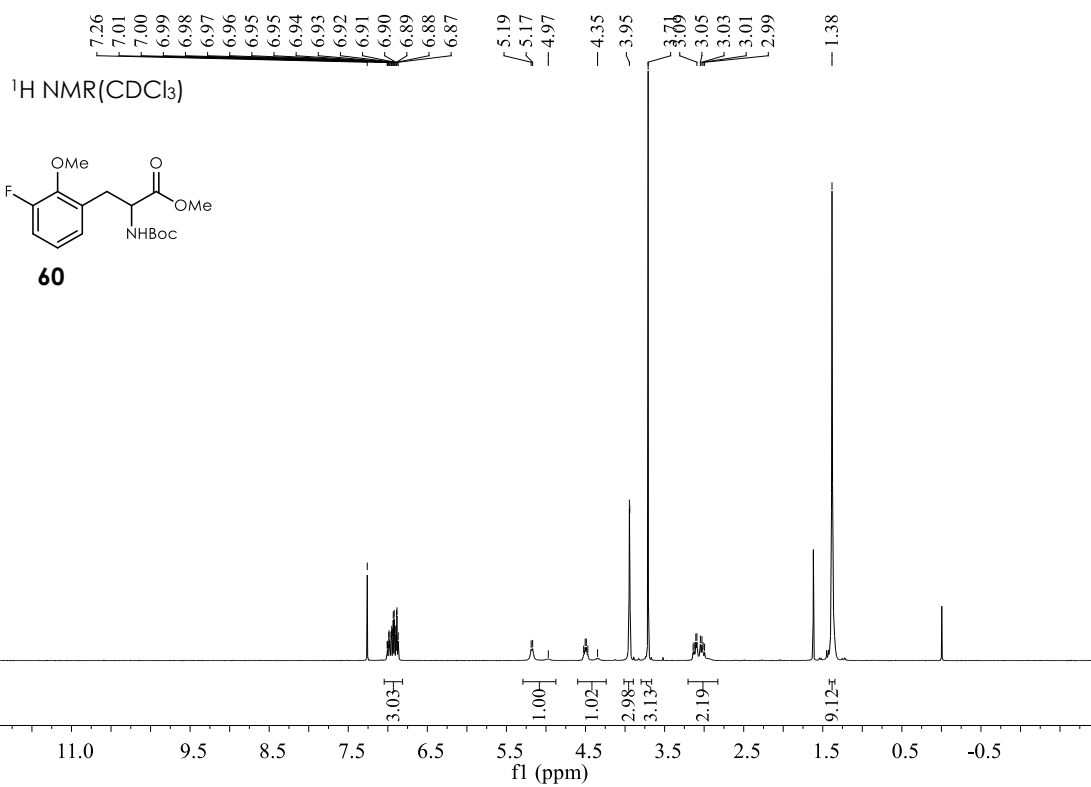

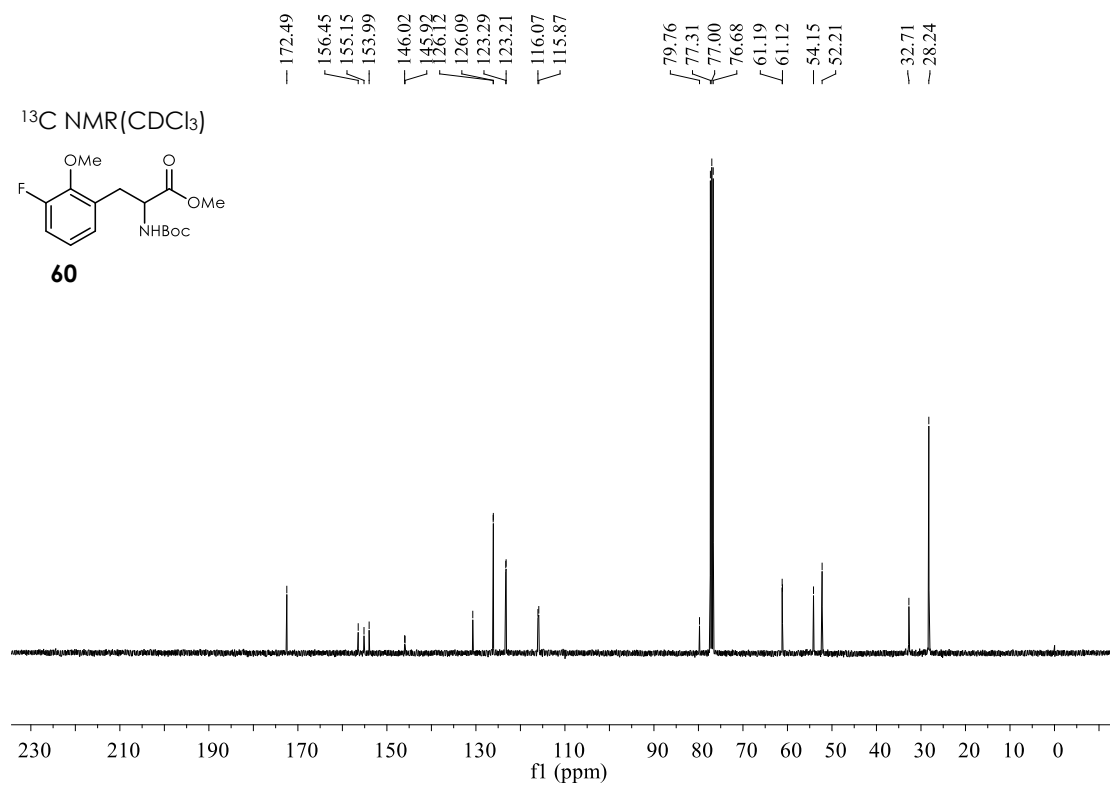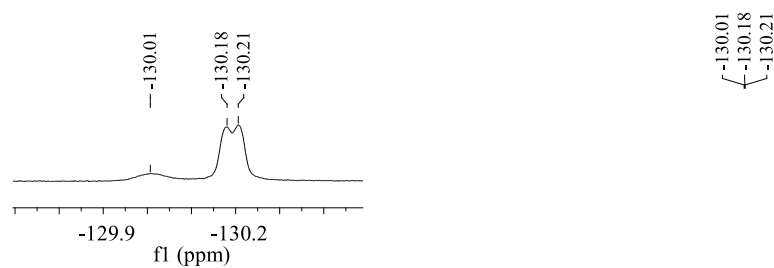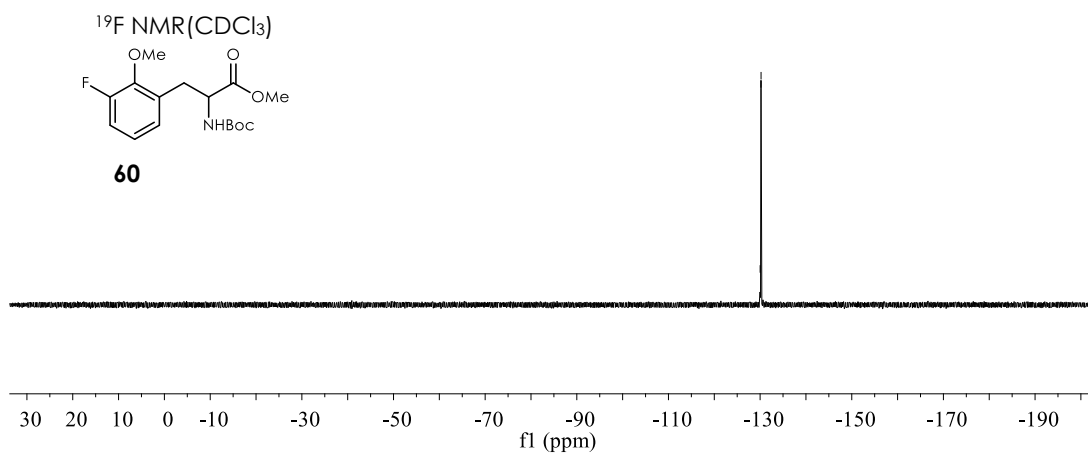

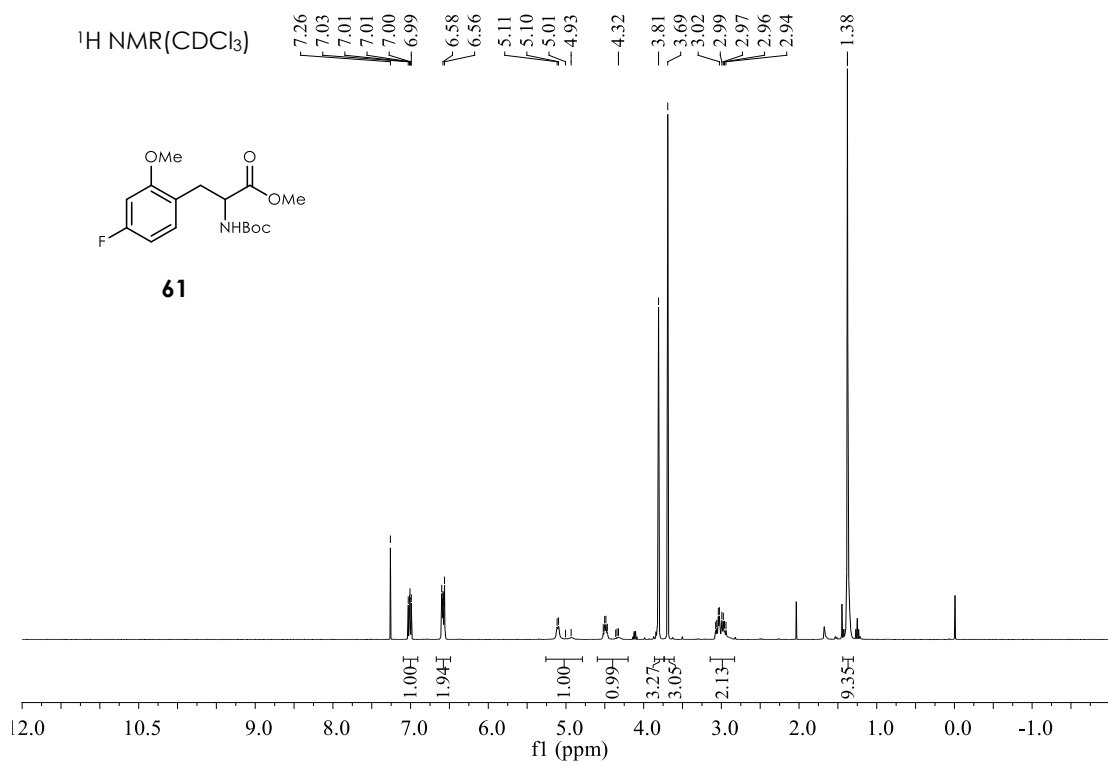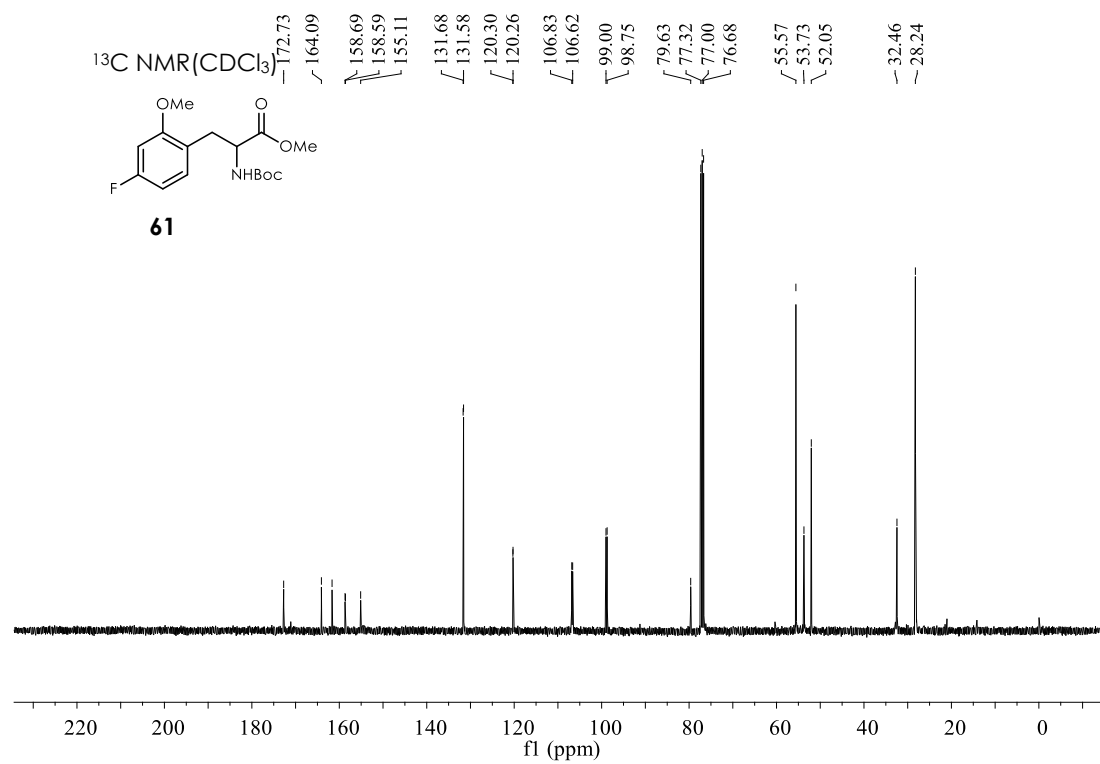

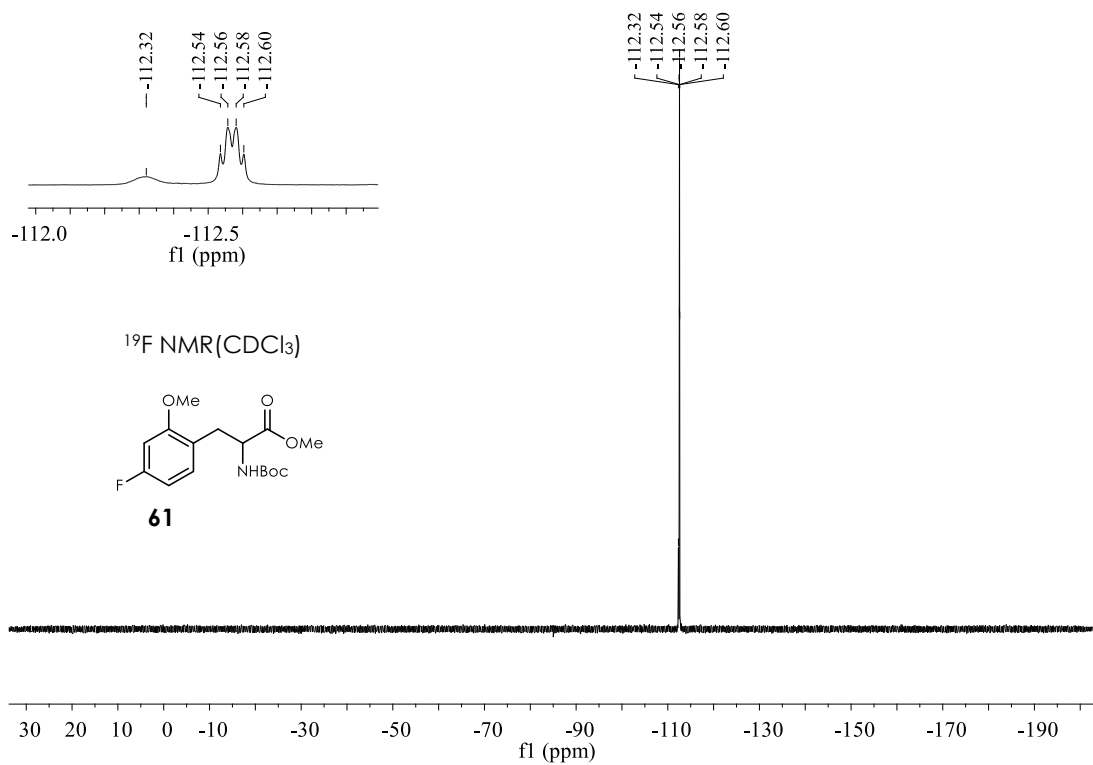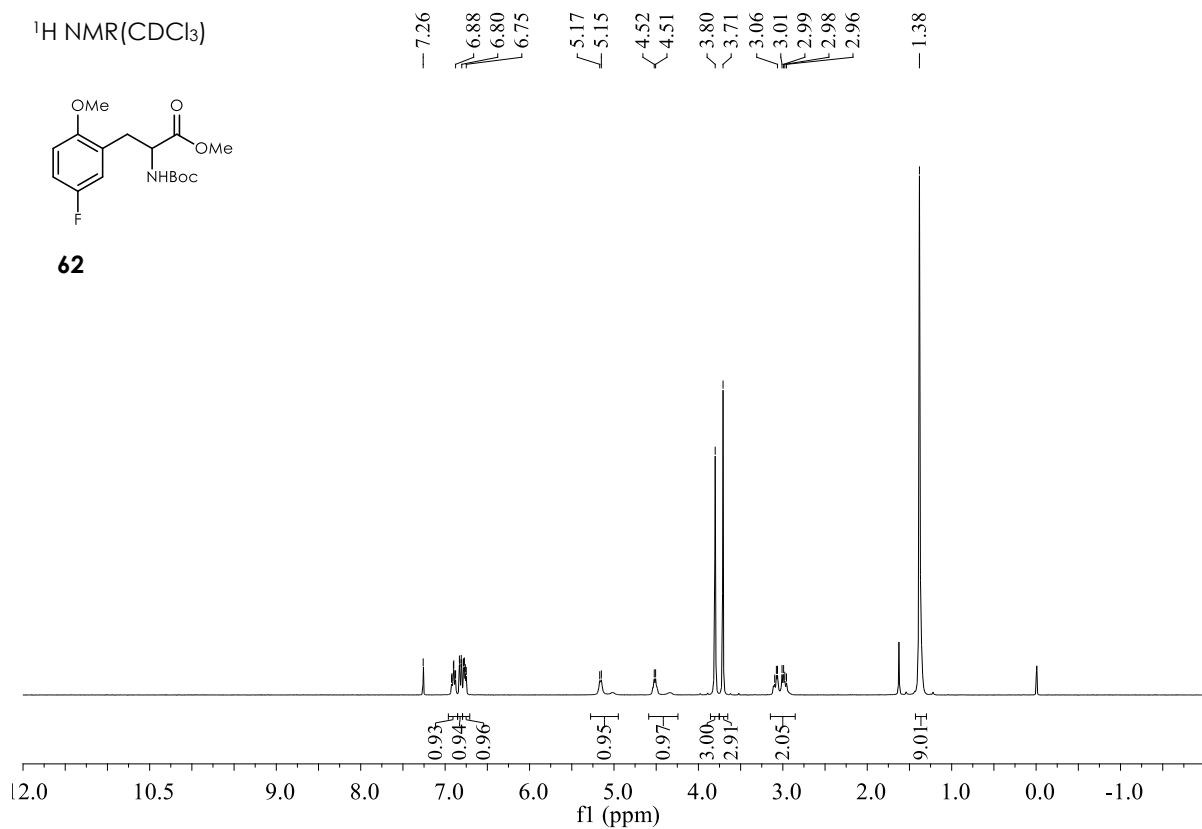

$^{13}\text{C}$  NMR( $\text{CDCl}_3$ )

-172.53  
-157.90  
-155.52  
-155.10  
-153.76  
-153.74  
-126.40  
-126.32  
-117.71  
-114.18  
-113.95  
-111.12  
-111.04  
-79.68  
-55.84  
-53.64  
-52.11  
-32.88  
-28.22

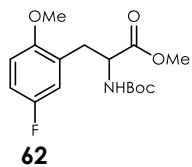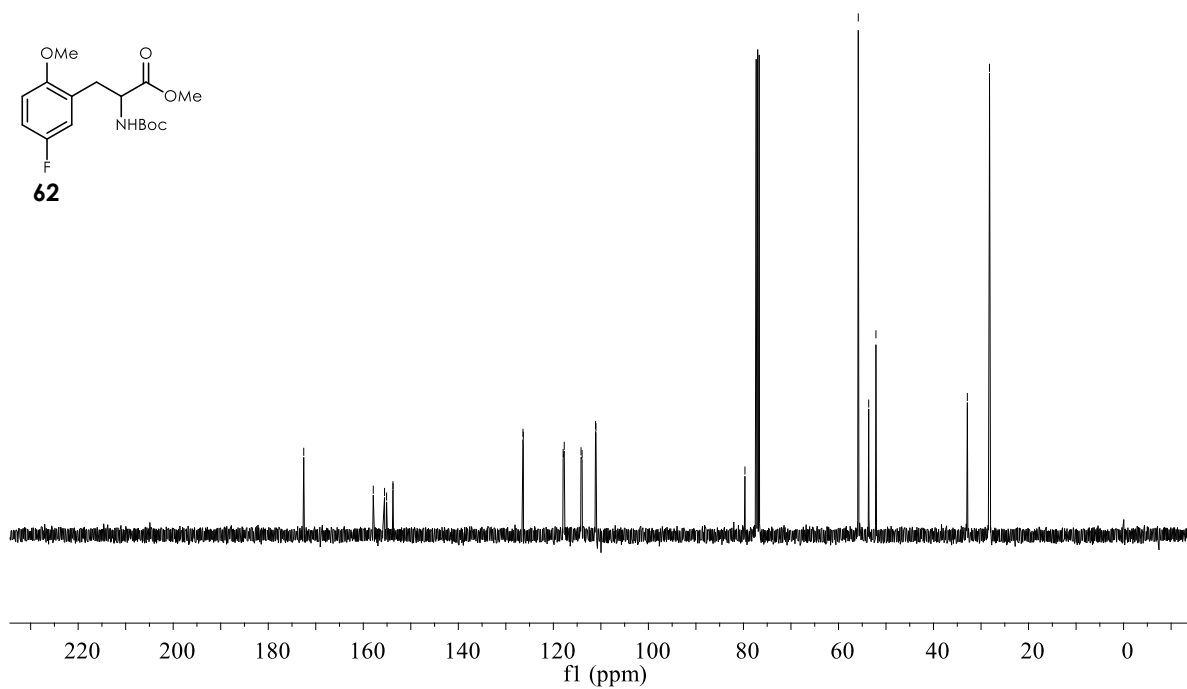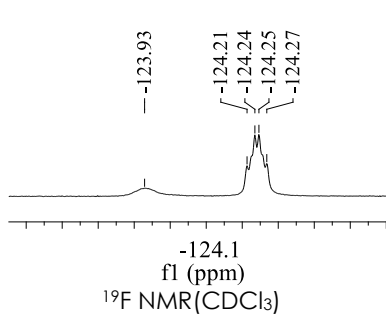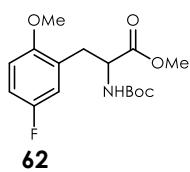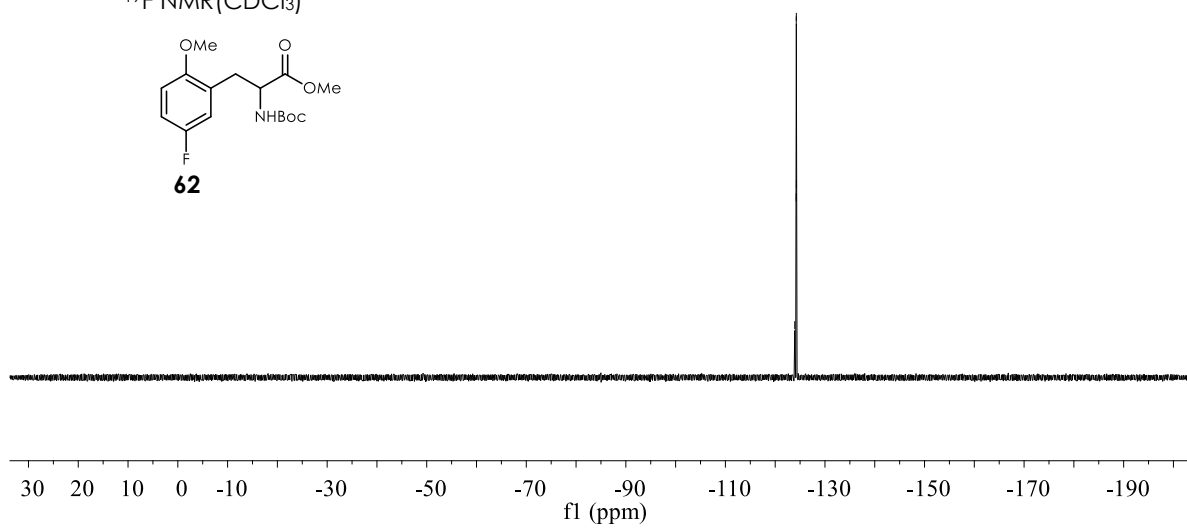

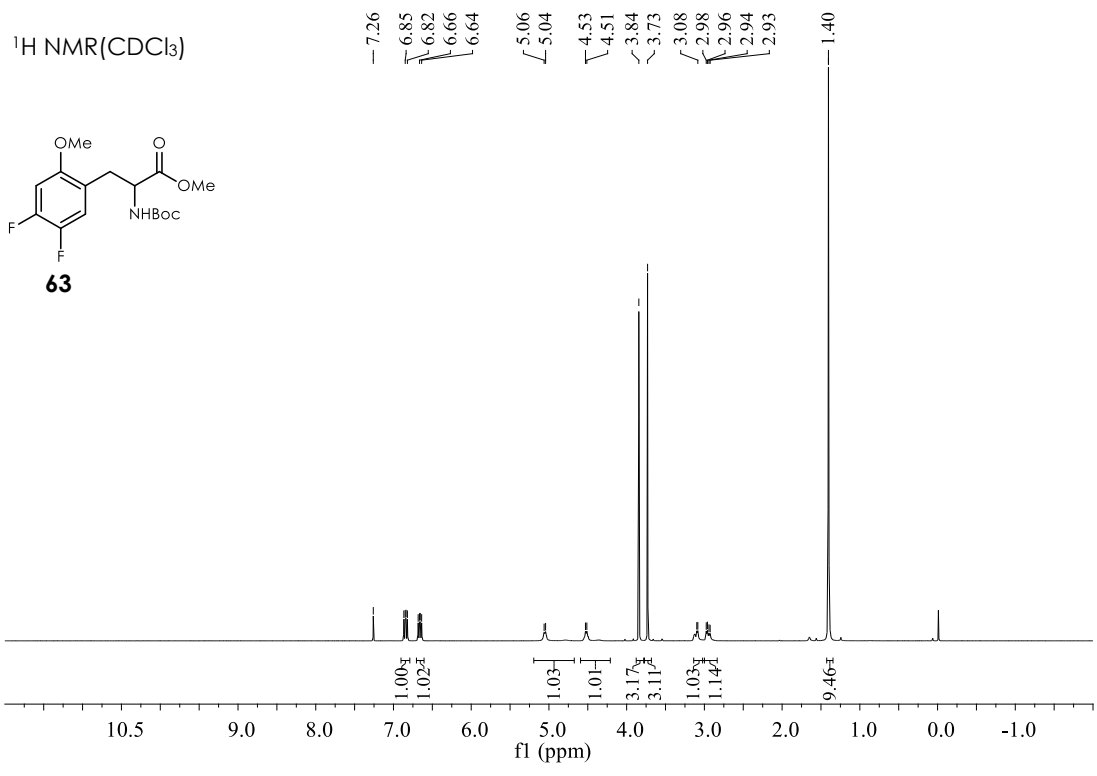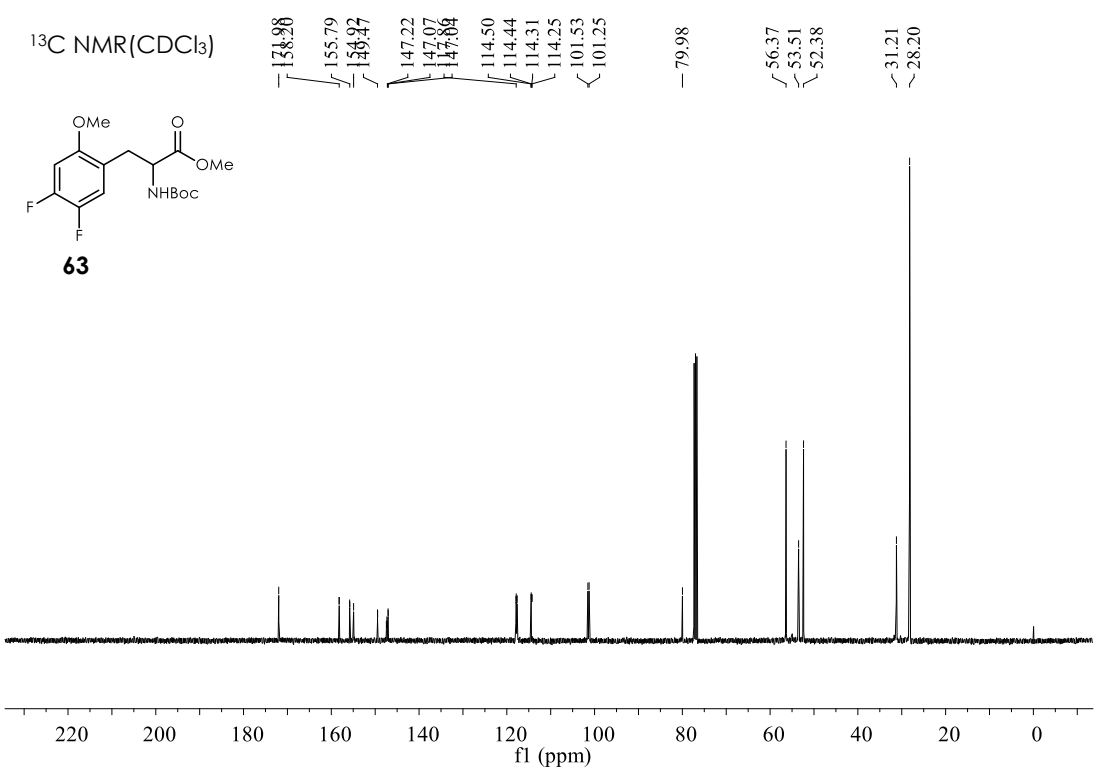

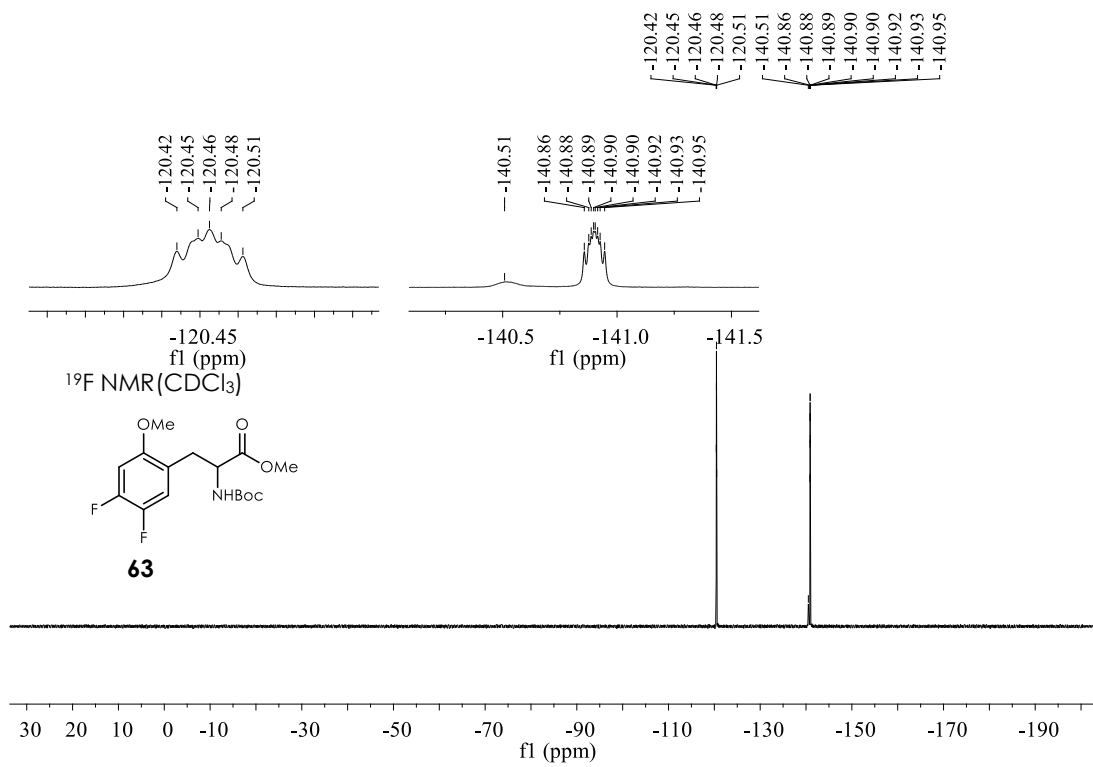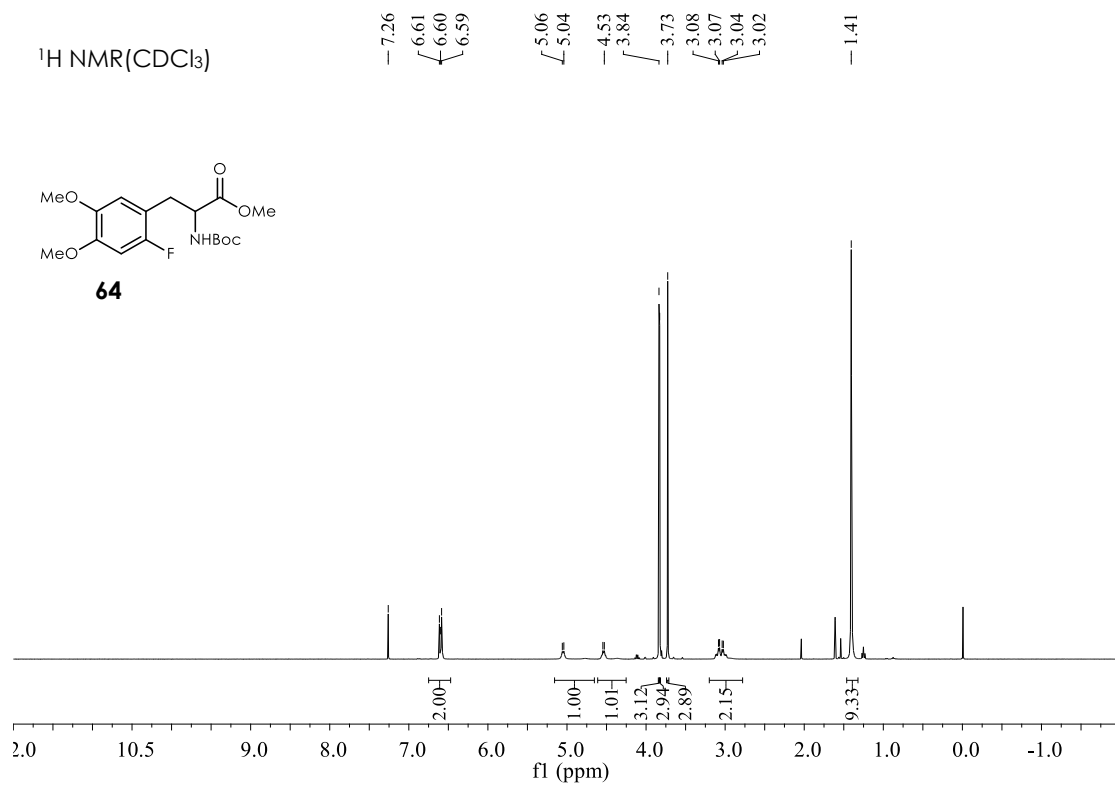



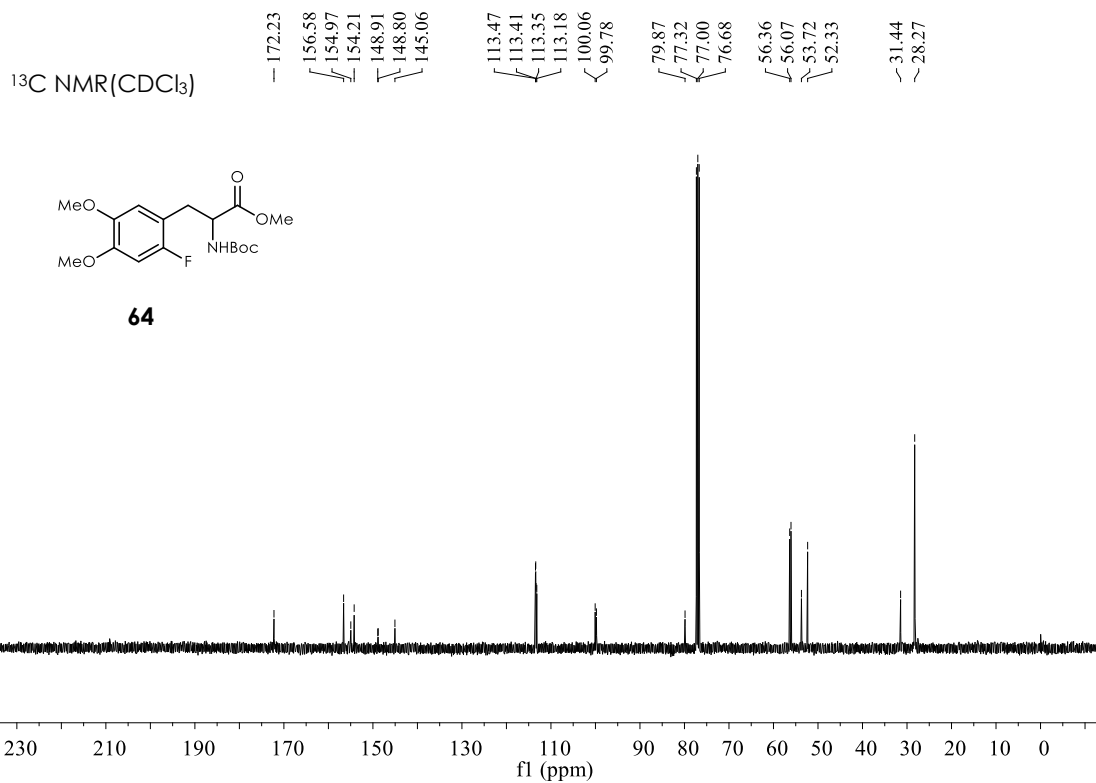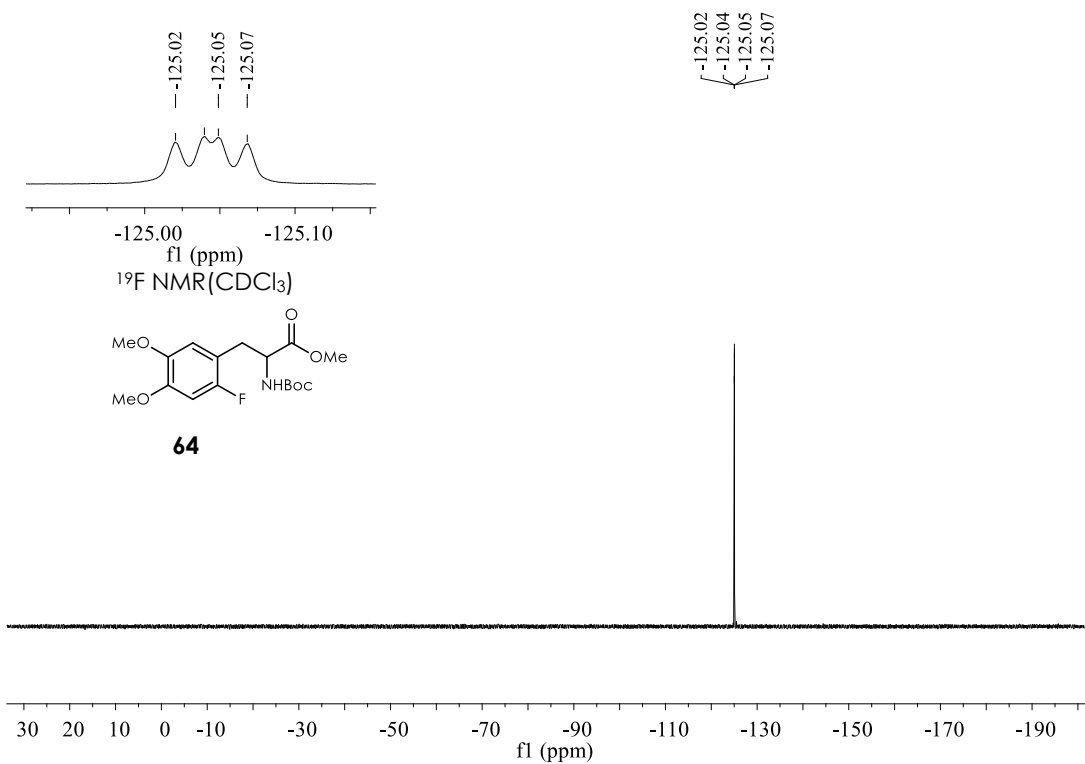

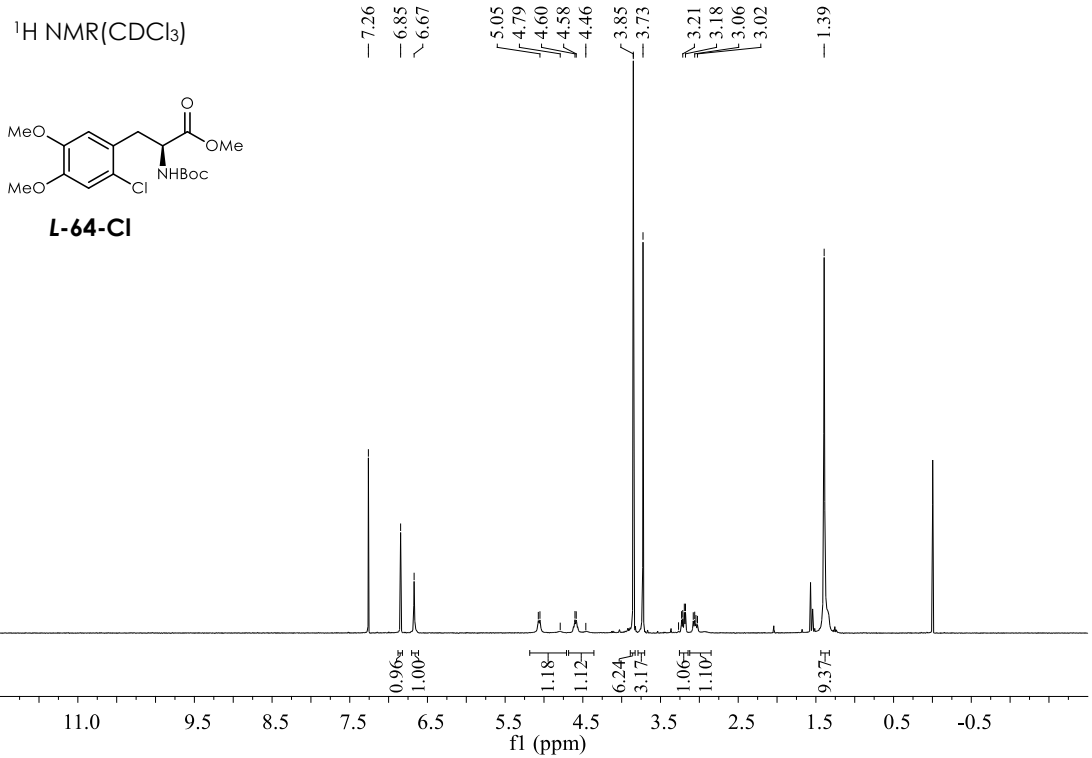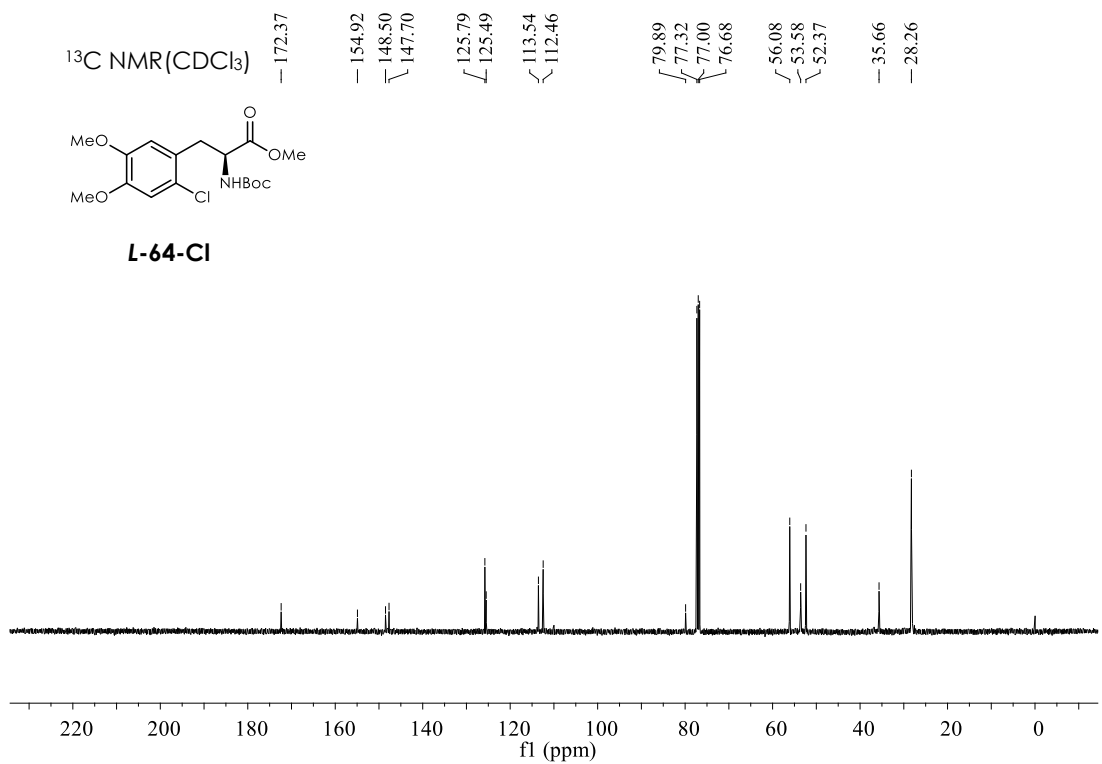

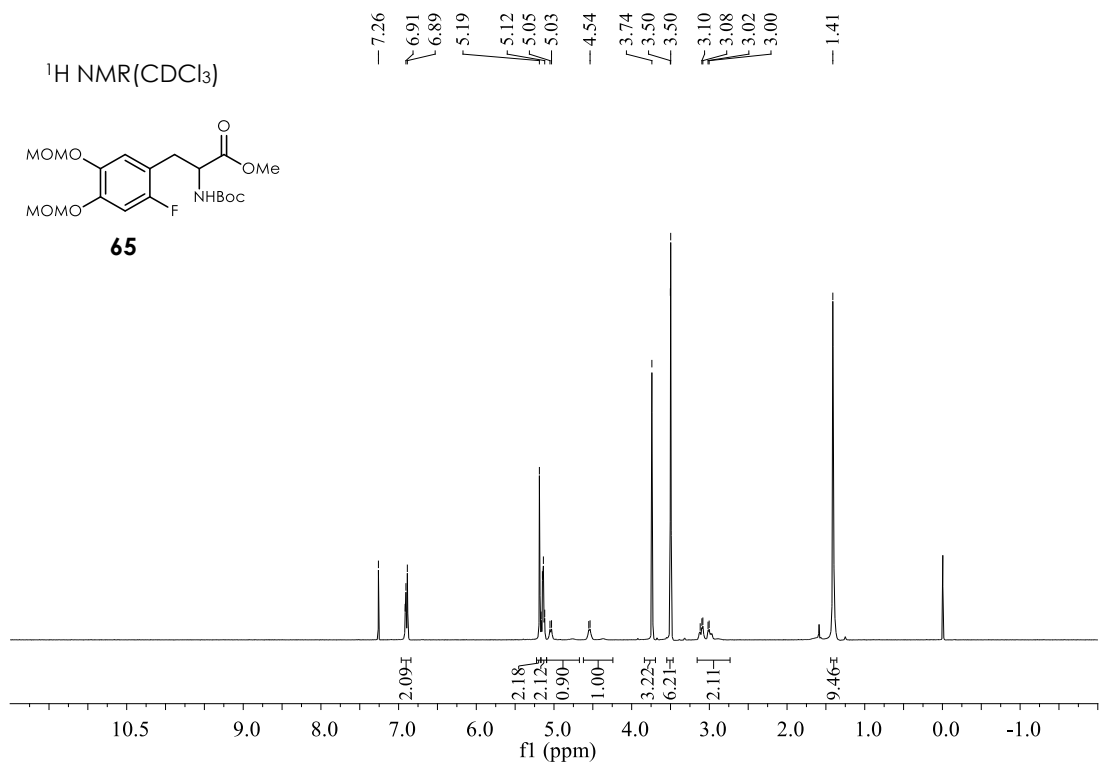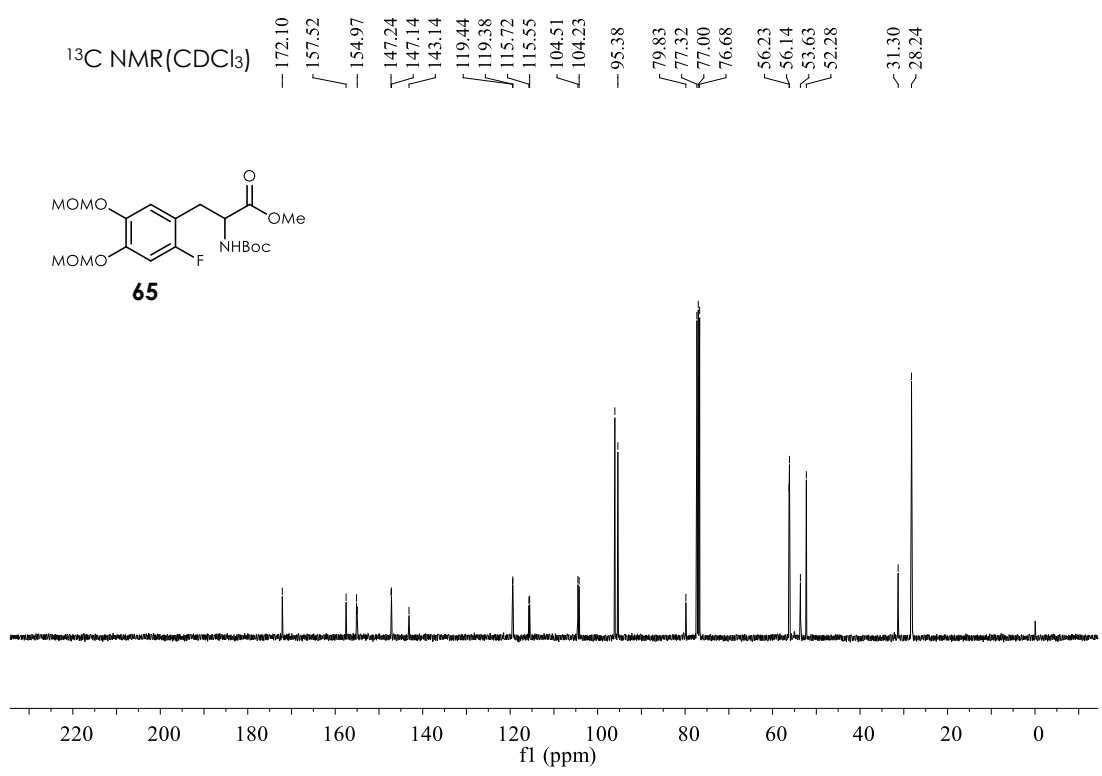

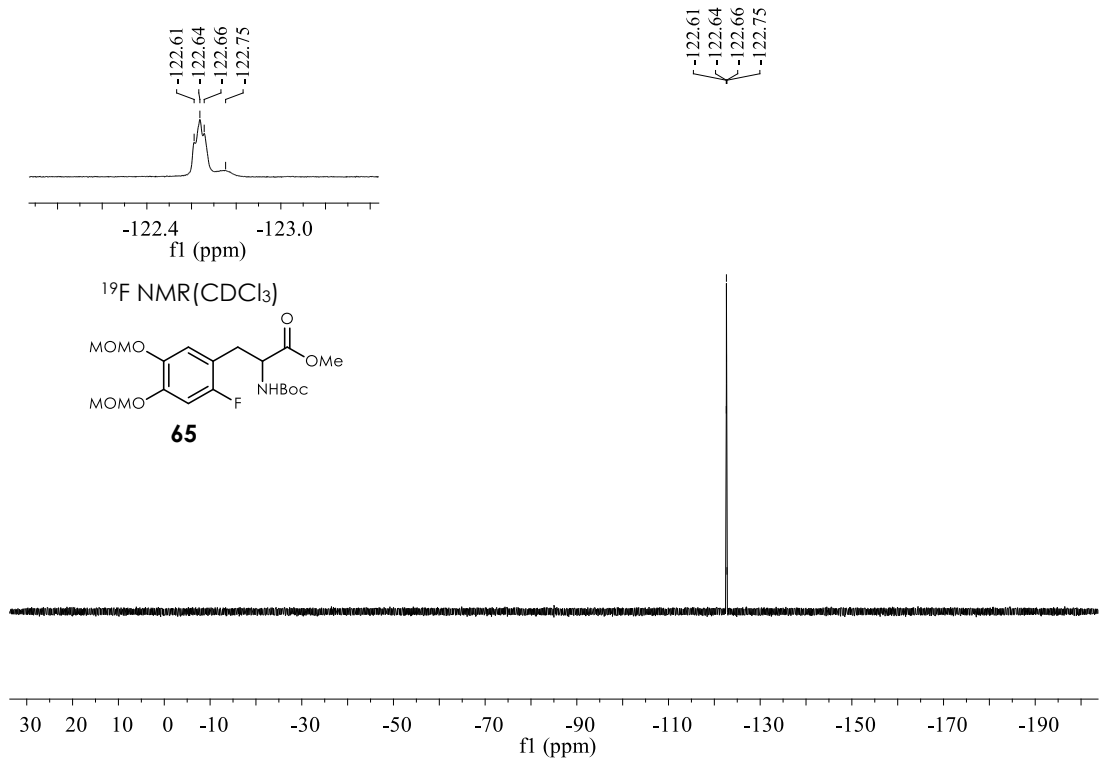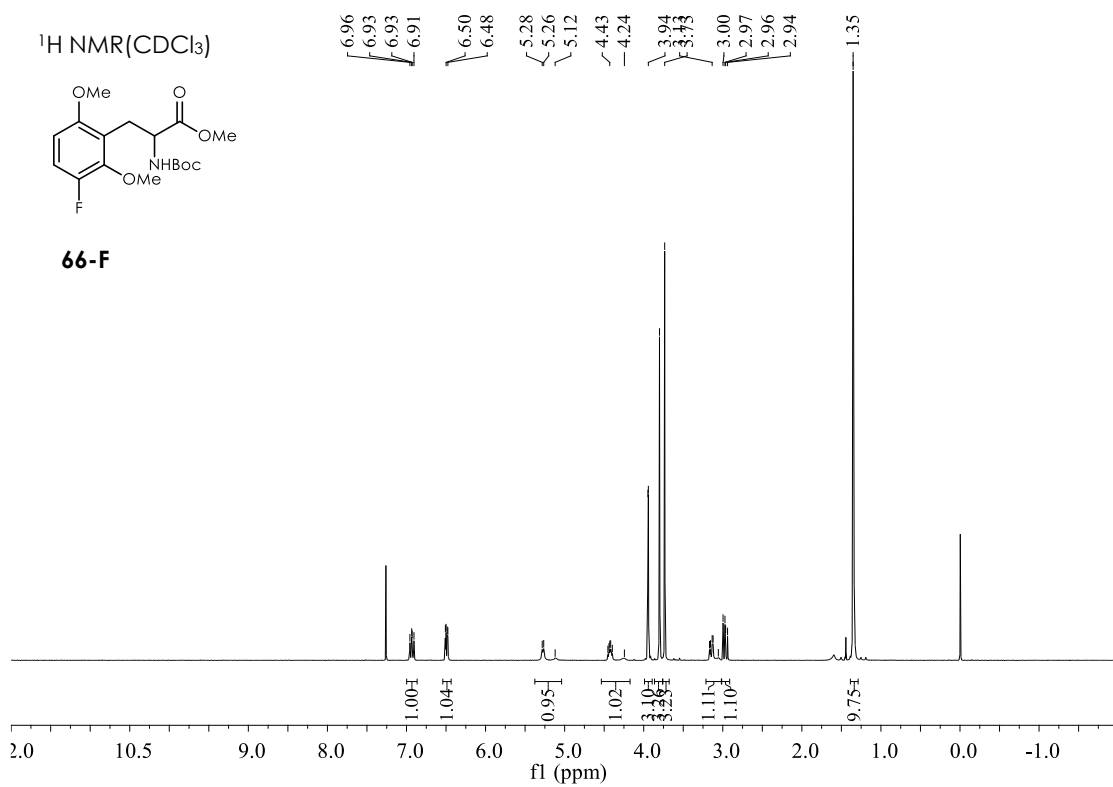

<sup>1</sup>H NMR(CDCl<sub>3</sub>)

<sup>13</sup>C NMR(CDCl<sub>3</sub>)

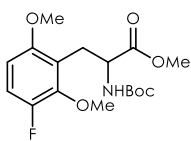

**66-F**

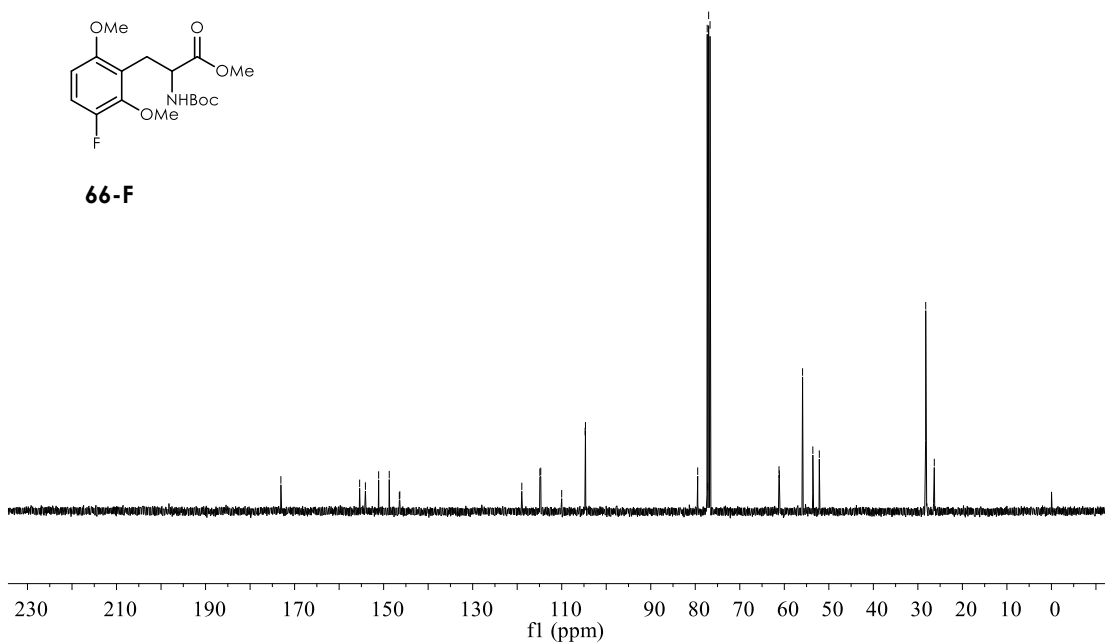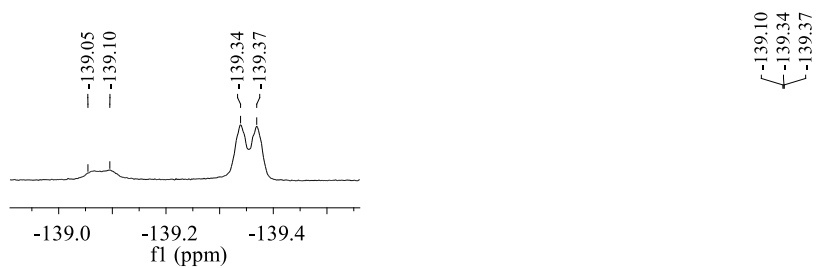

<sup>19</sup>F NMR(CDCl<sub>3</sub>)

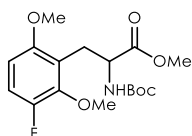

**66-F**

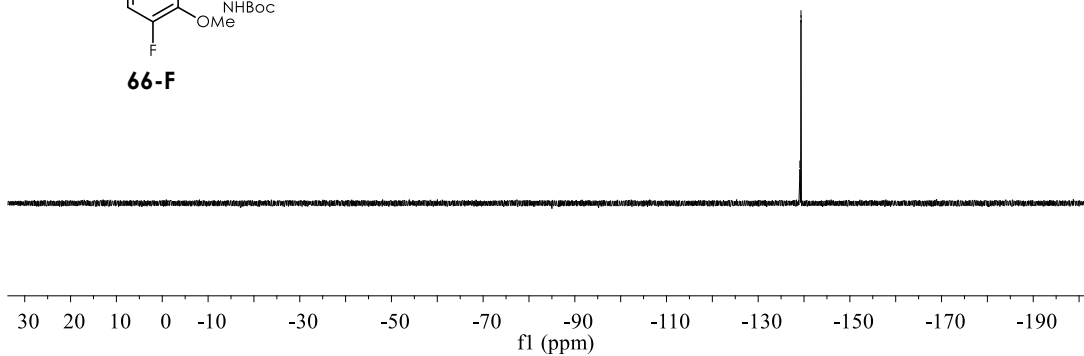

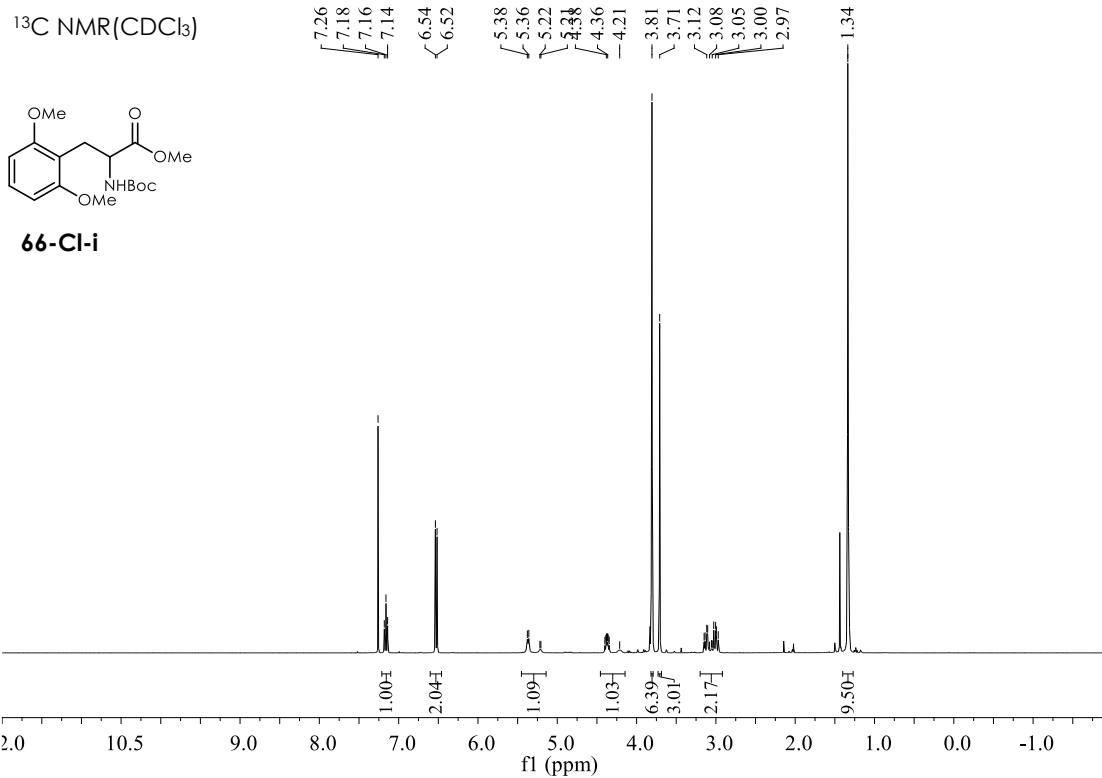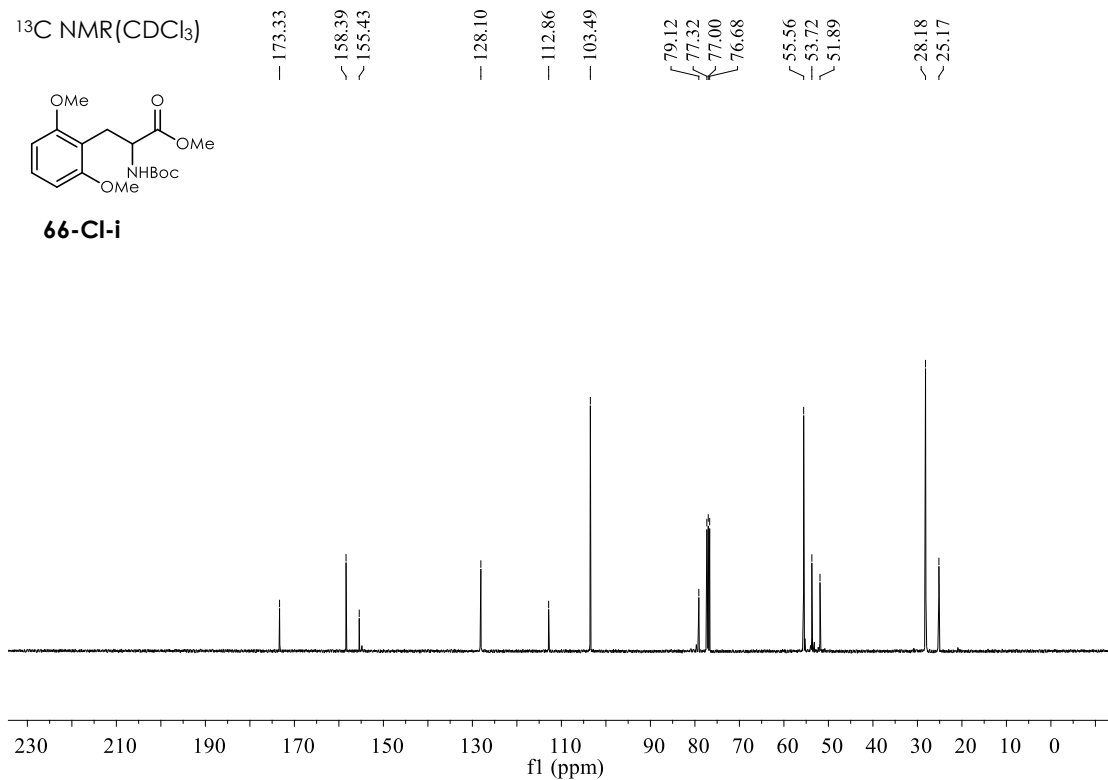

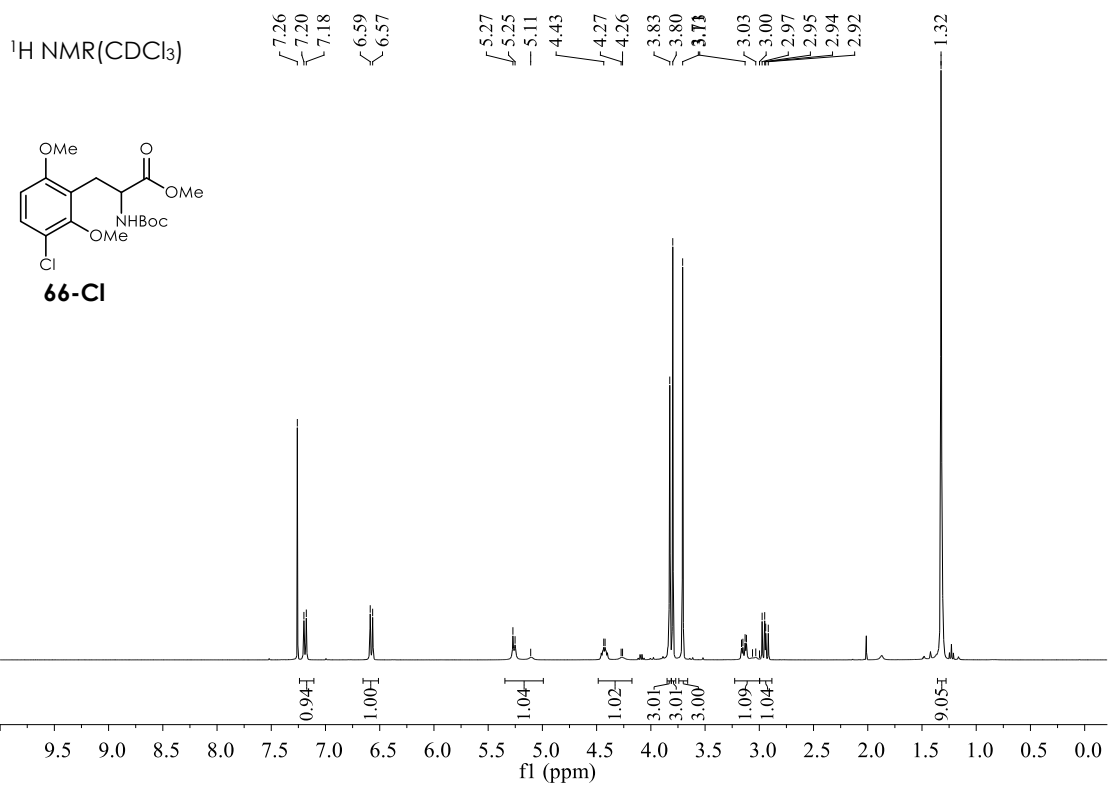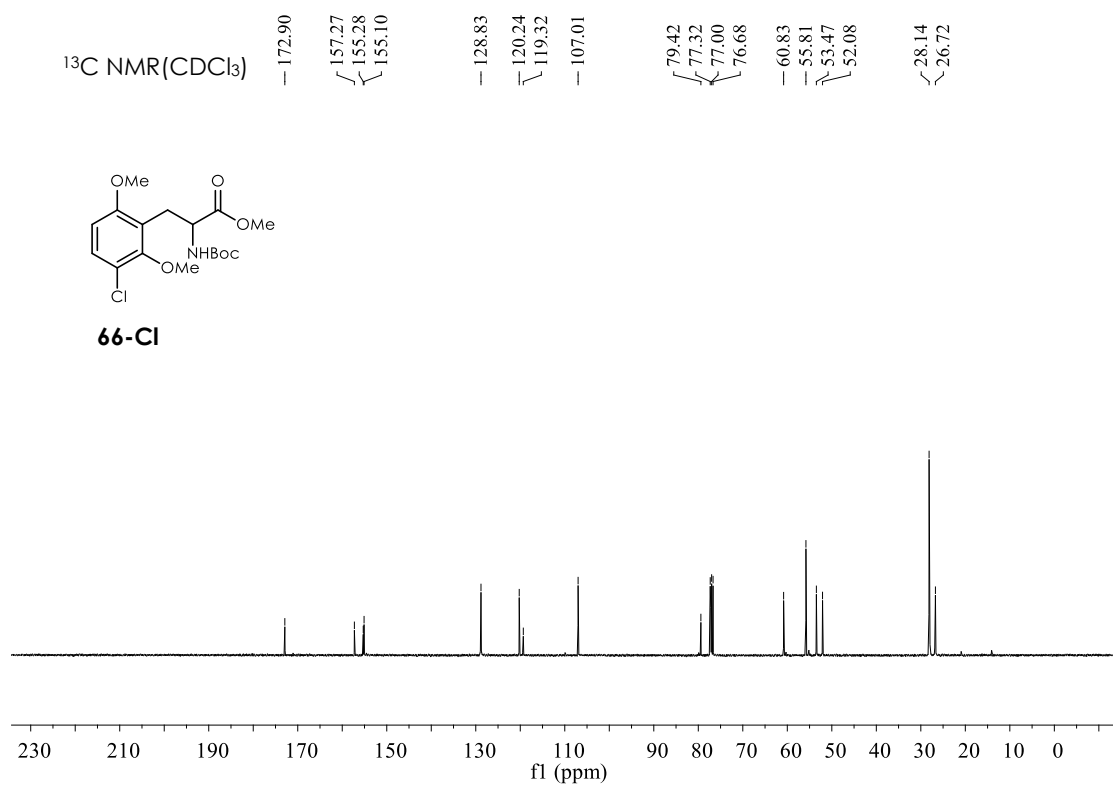

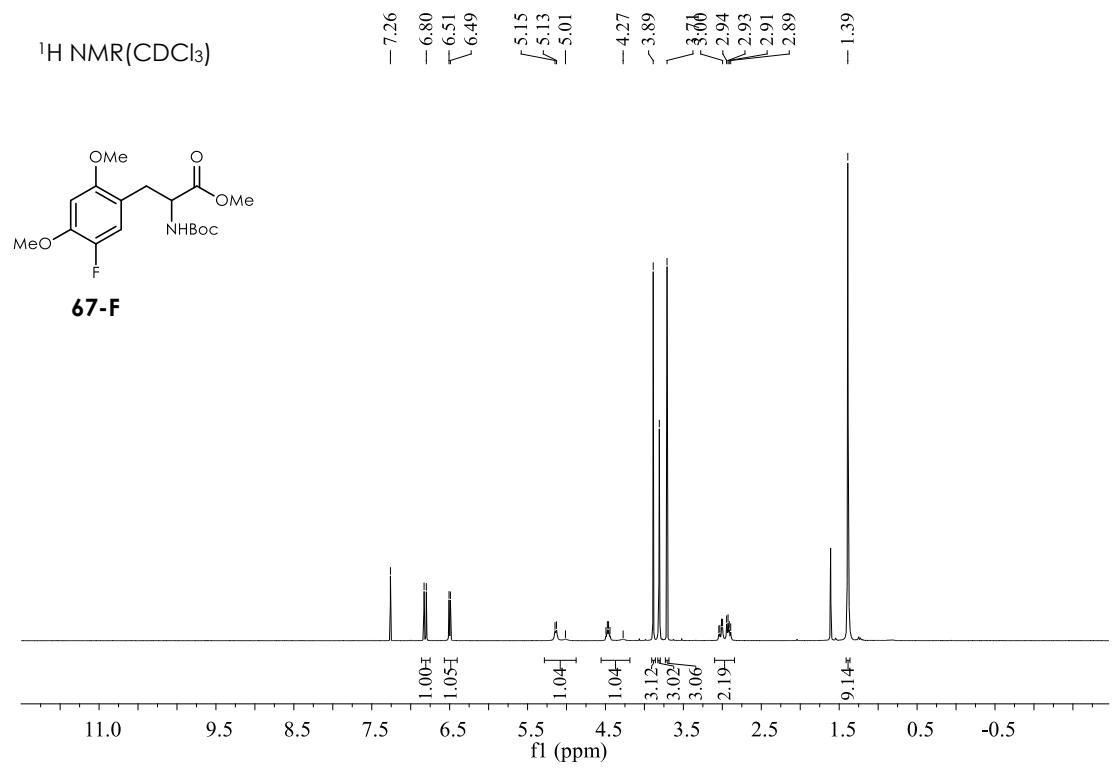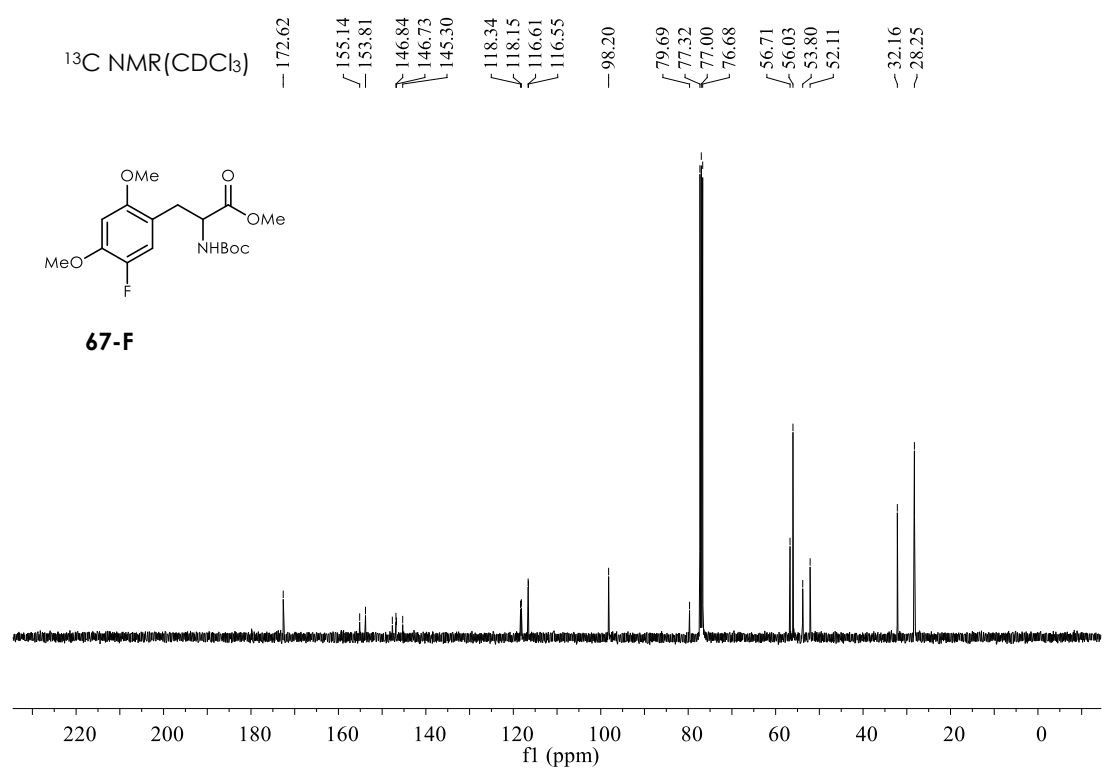



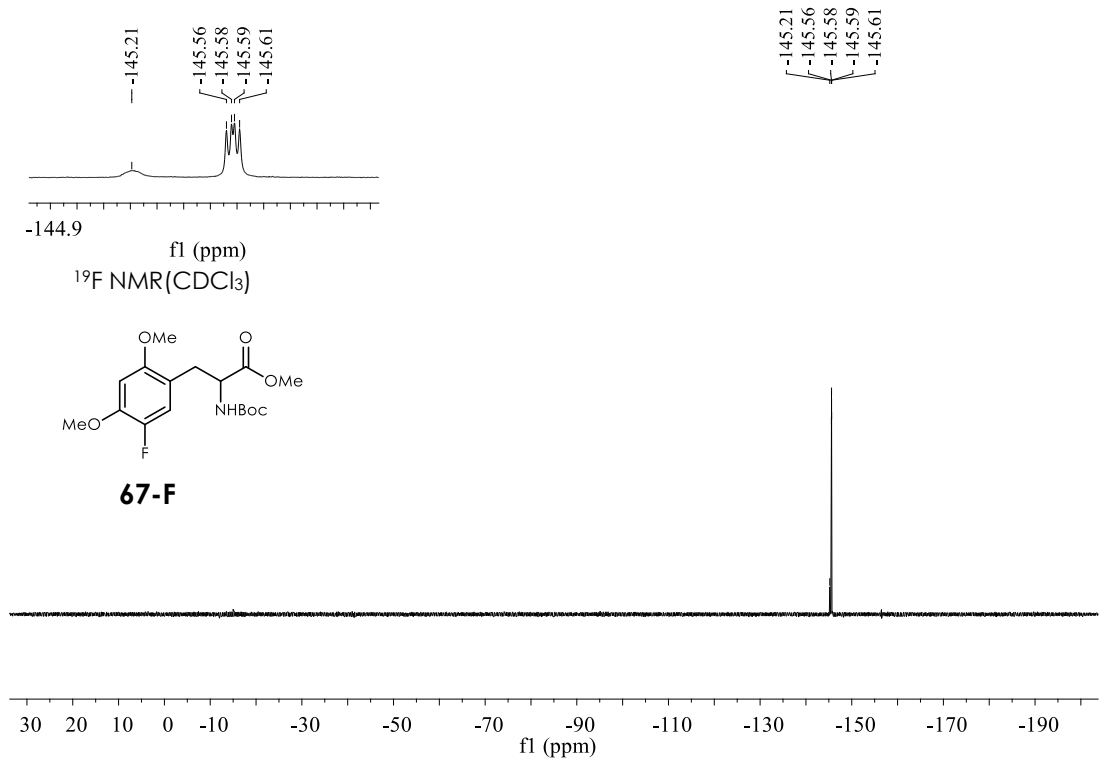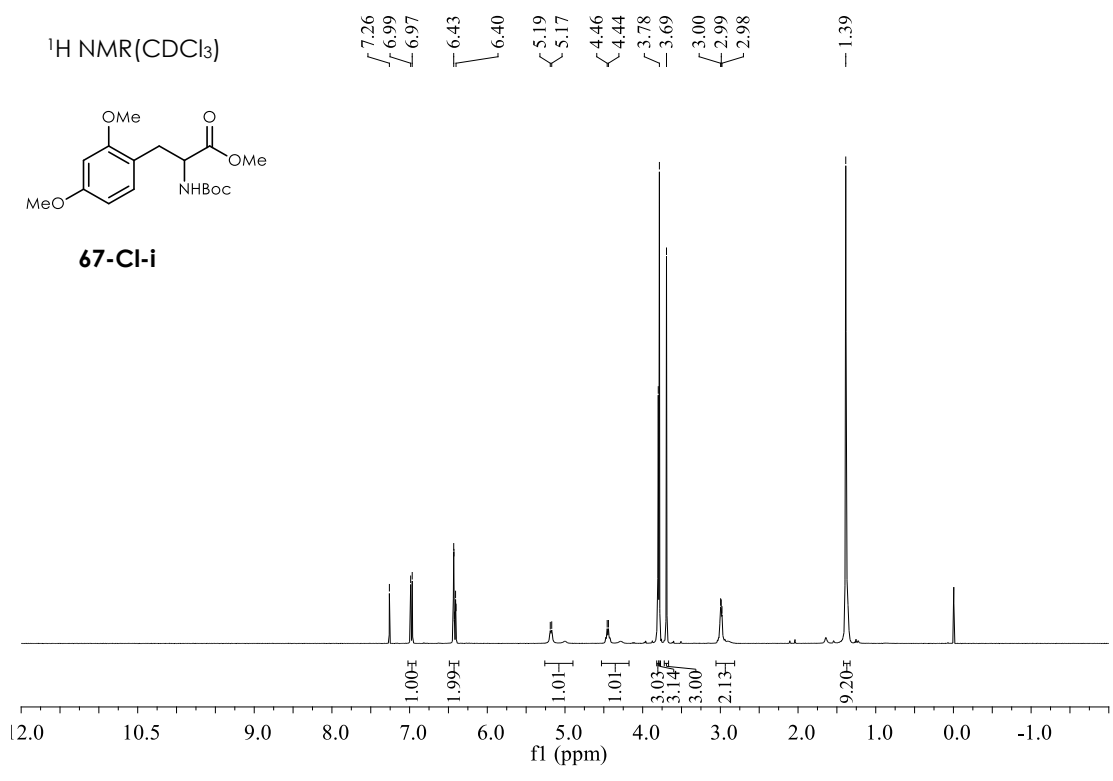

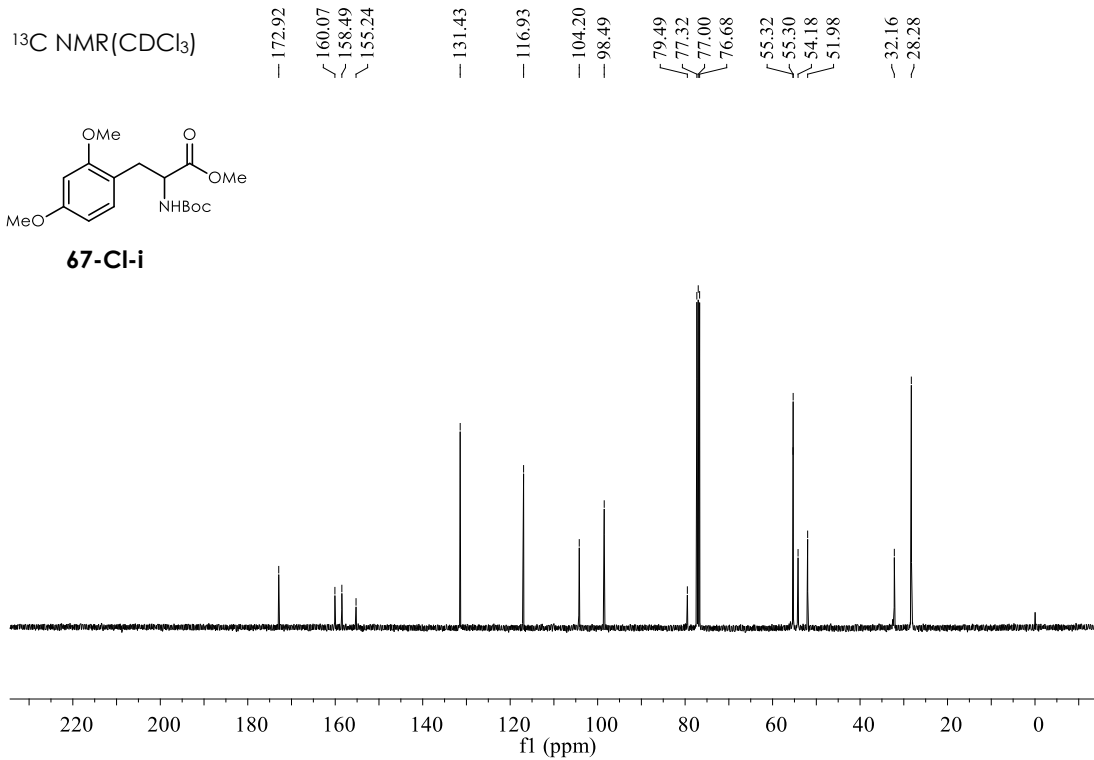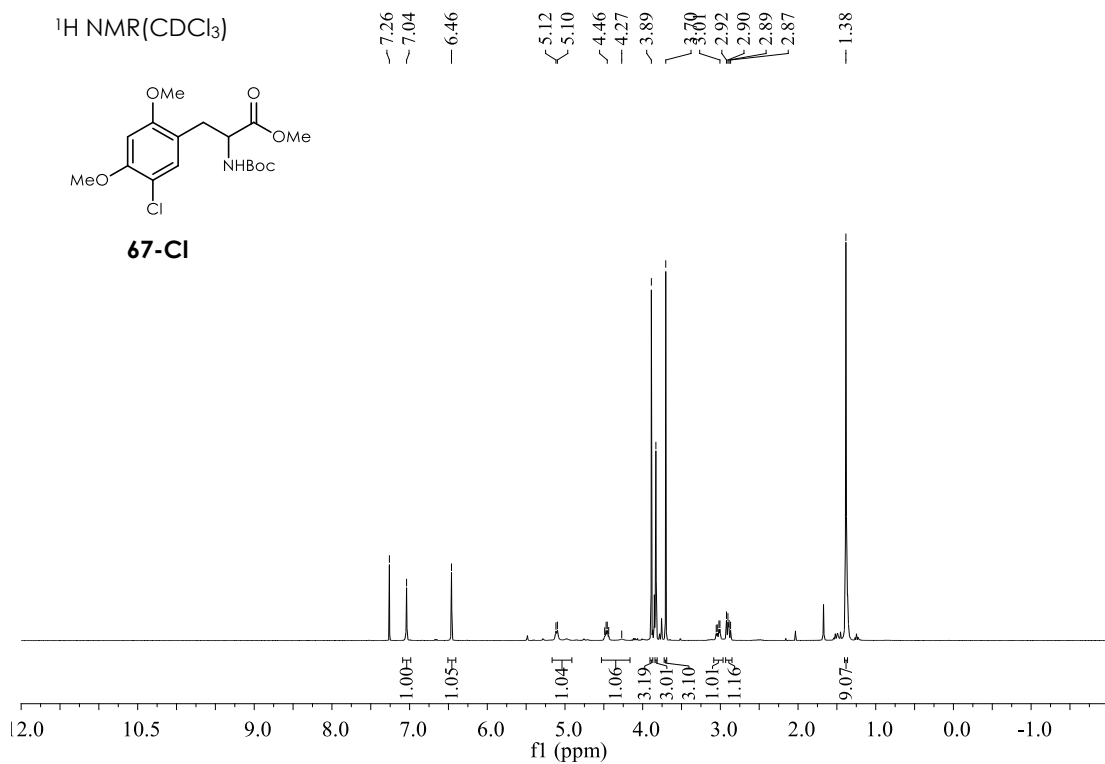

<sup>13</sup>C NMR (CDCl<sub>3</sub>)

172.60  
157.15  
155.08  
154.78  
131.89  
117.60  
113.24  
96.48  
79.67  
77.32  
77.00  
76.68  
56.28  
55.75  
53.67  
52.08  
32.15  
28.23

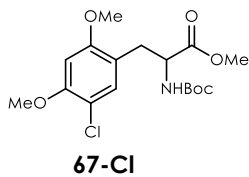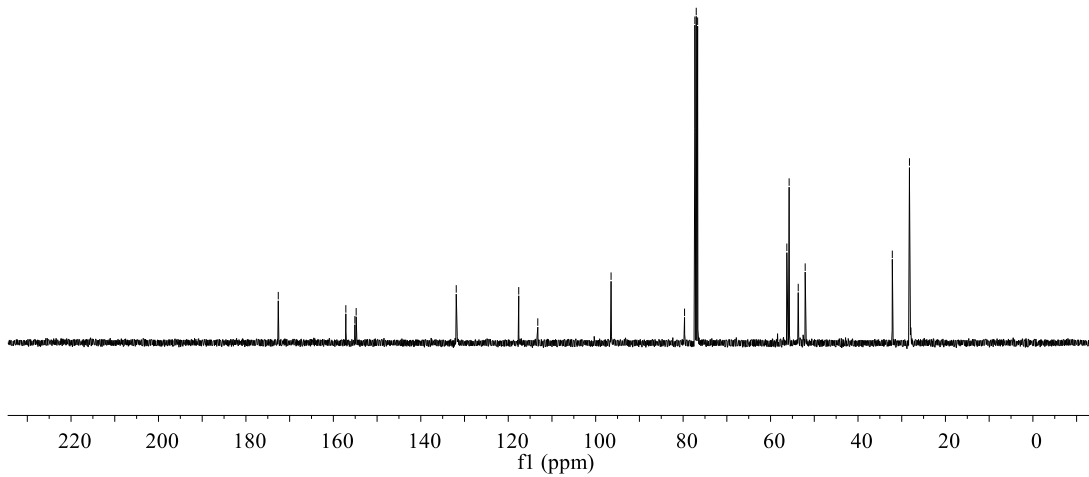

<sup>1</sup>H NMR (CDCl<sub>3</sub>)

7.26  
6.72  
6.68  
6.65  
5.18  
5.16  
4.99  
4.31  
3.83  
3.75  
3.03  
3.01  
2.99  
2.96  
1.39

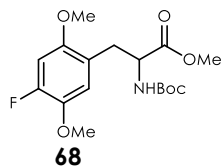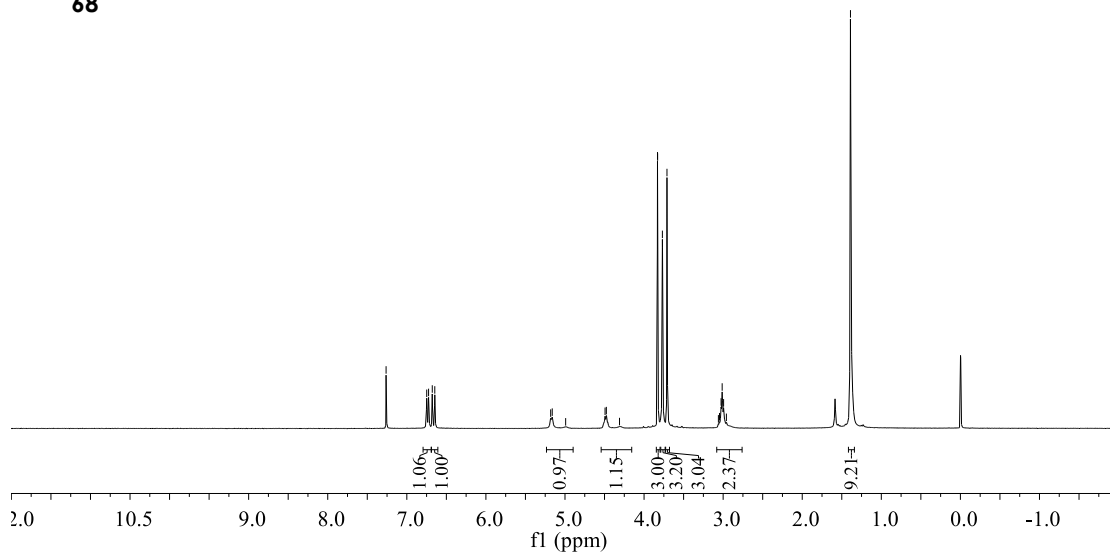

<sup>13</sup>C NMR (CDCl<sub>3</sub>)

172.64  
151.75  
151.67  
150.61  
140.98  
140.87  
119.86  
119.83  
117.18  
117.15  
100.60  
100.38  
79.69  
77.32  
77.00  
76.68  
57.25  
56.03  
53.93  
52.12  
32.46  
28.27

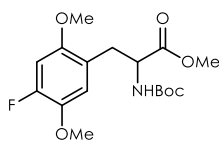

**68**

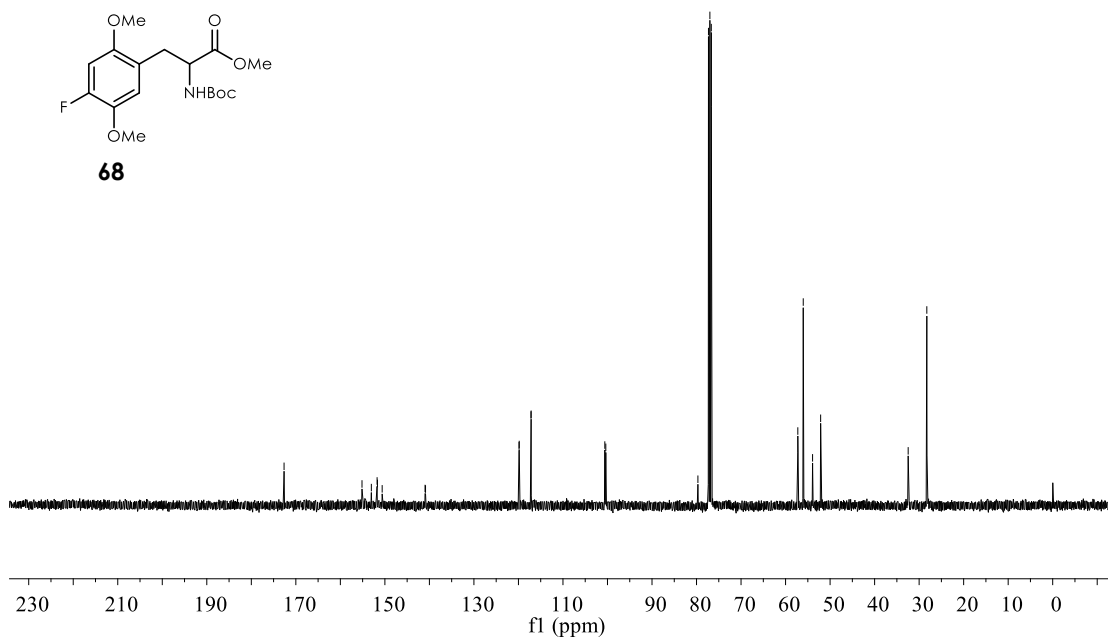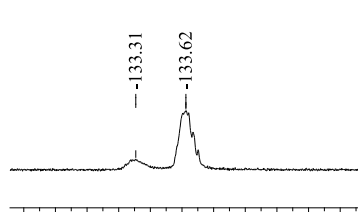

-133.4  
f1 (ppm)

<sup>19</sup>F NMR (CDCl<sub>3</sub>)

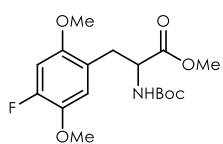

**68**

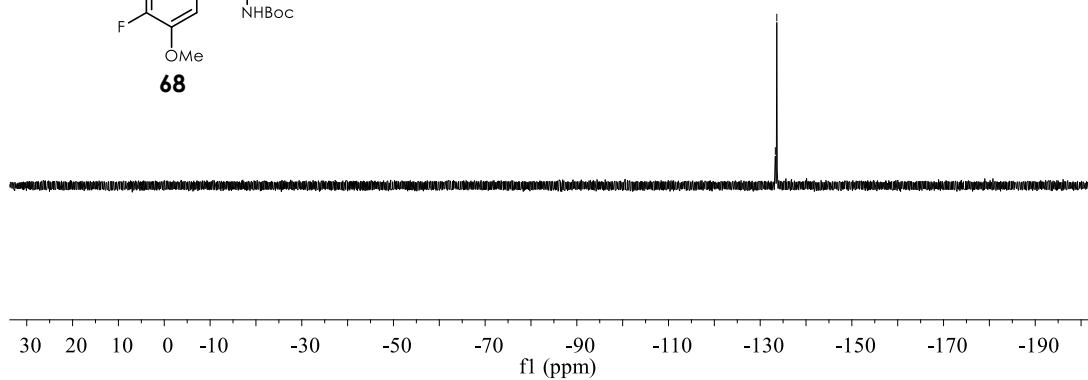

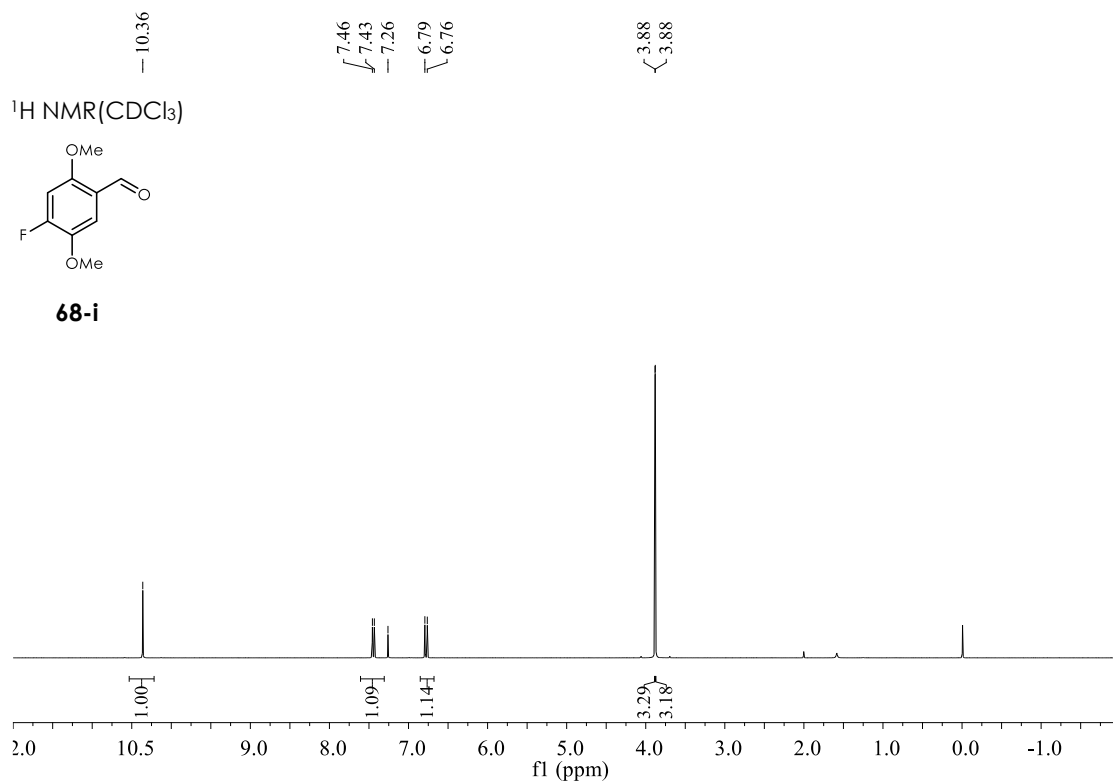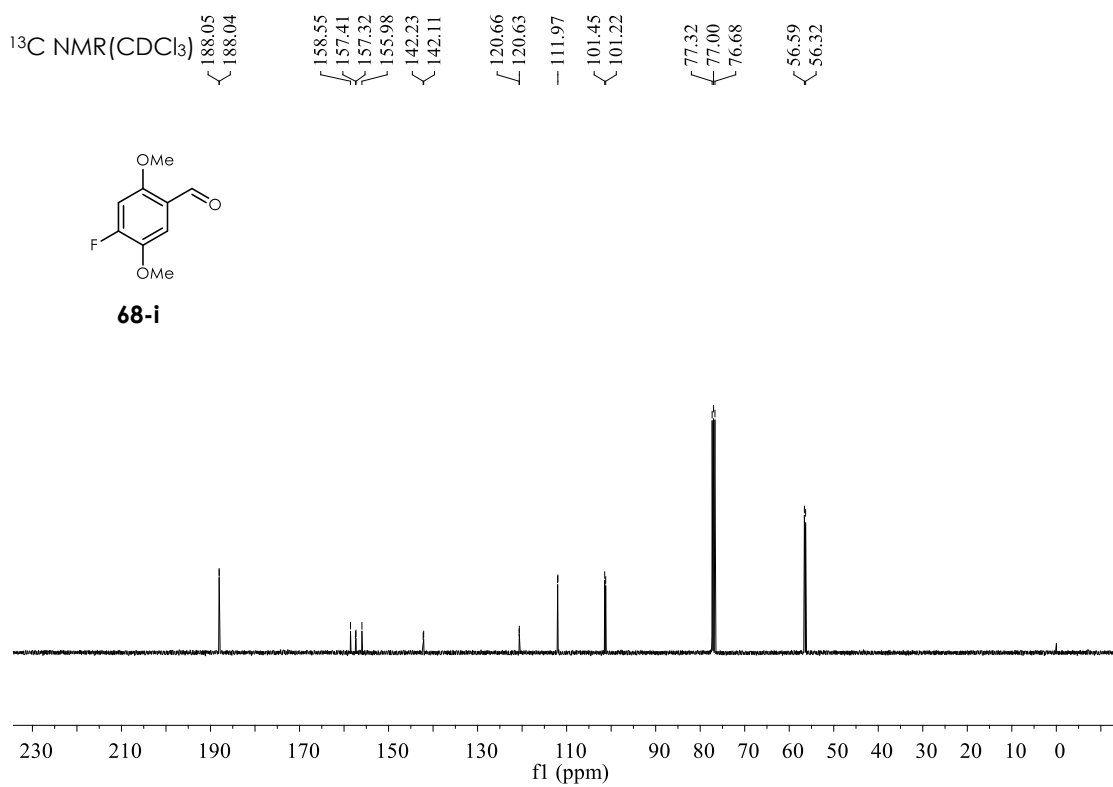

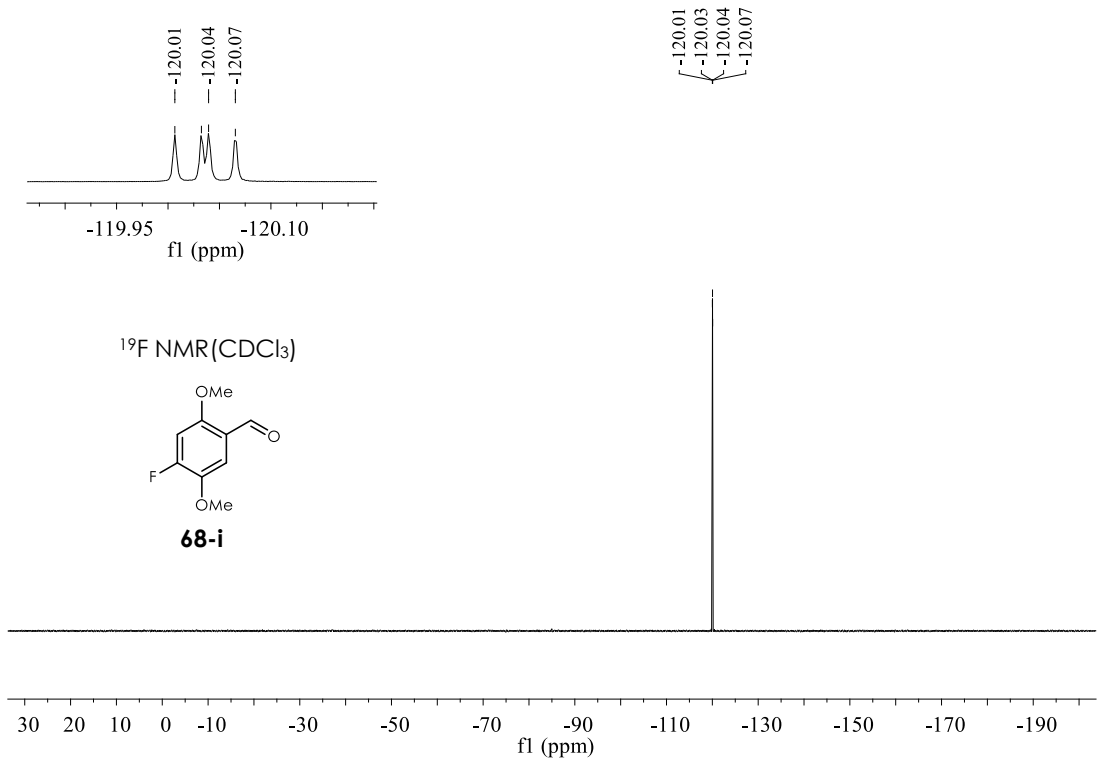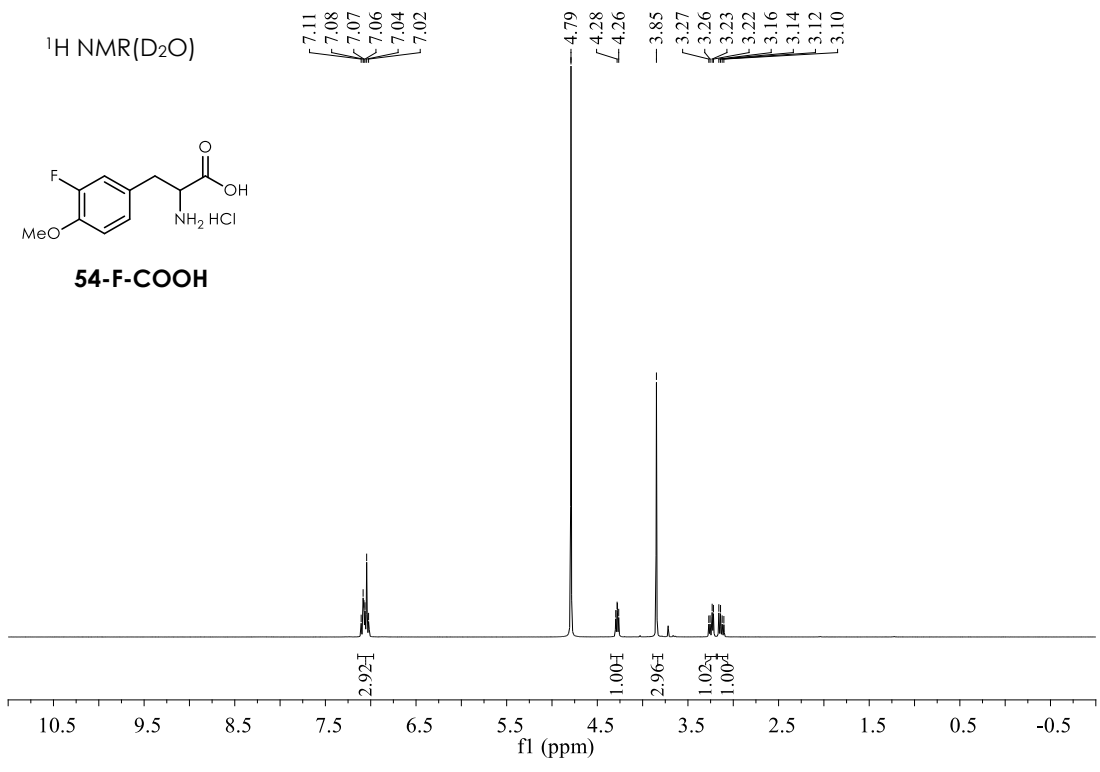

<sup>13</sup>C NMR (D<sub>2</sub>O)

— 171.22

152.93

150.51

146.31

146.20

126.89

125.63

125.60

116.69

116.51

114.14

114.12

56.03

53.91

34.54

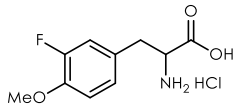

**54-F-COOH**

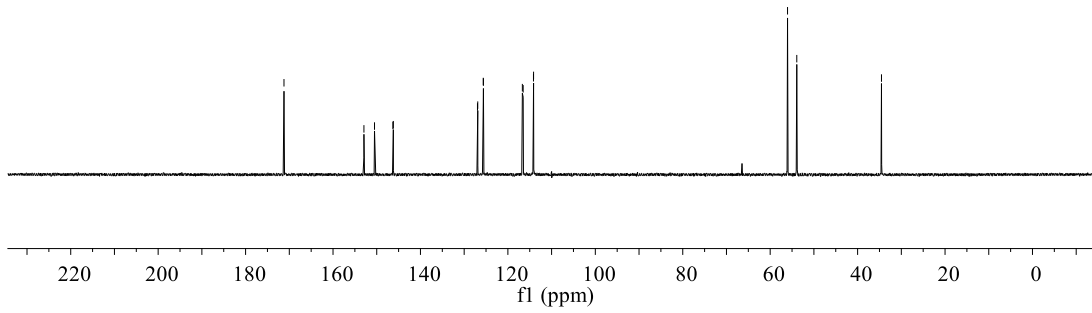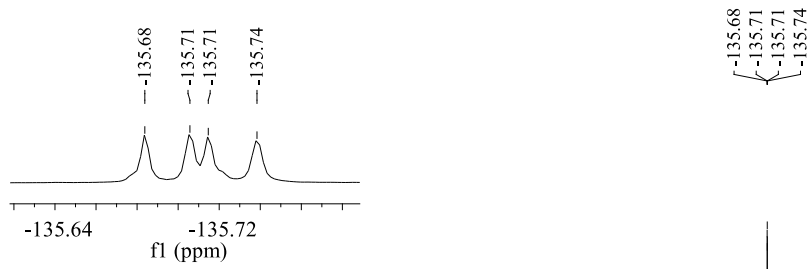

<sup>19</sup>F NMR (D<sub>2</sub>O)

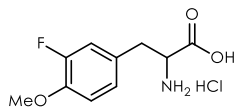

**54-F-COOH**

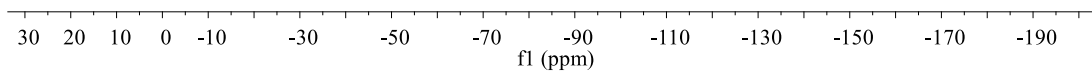

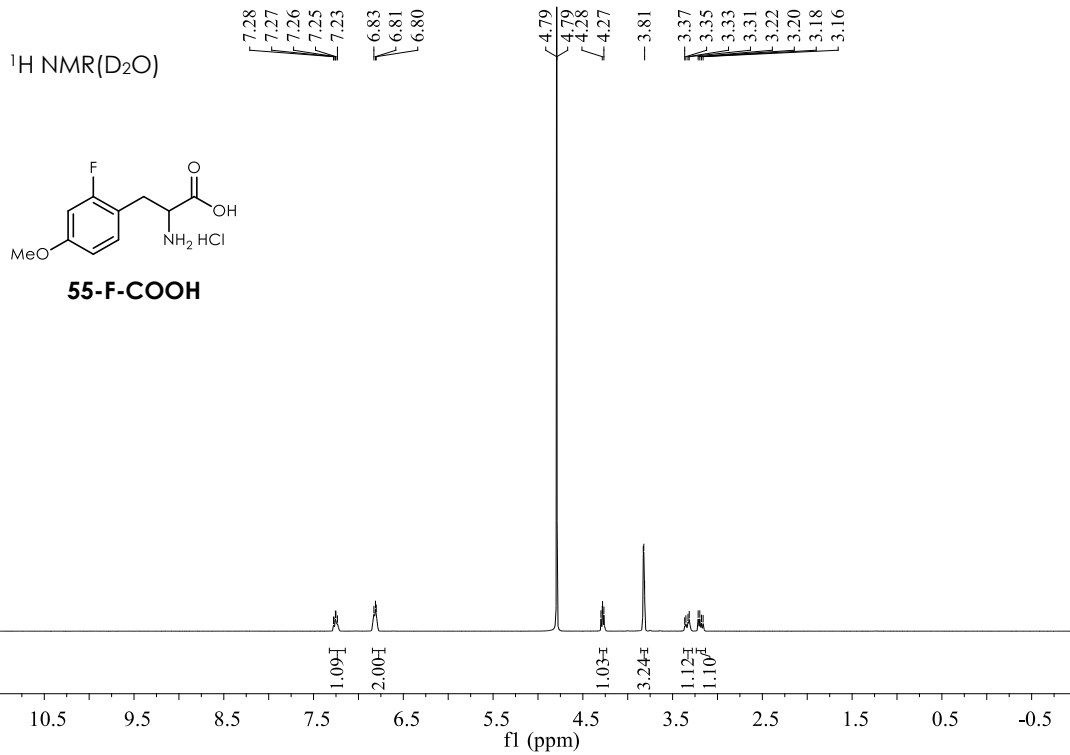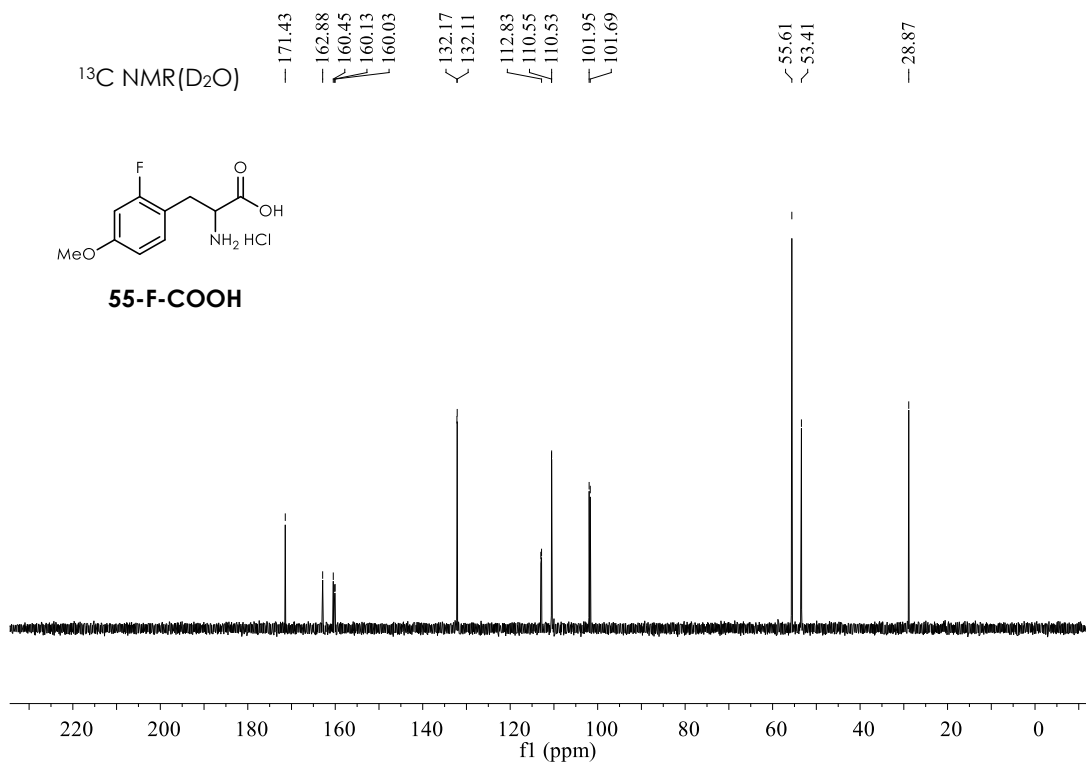



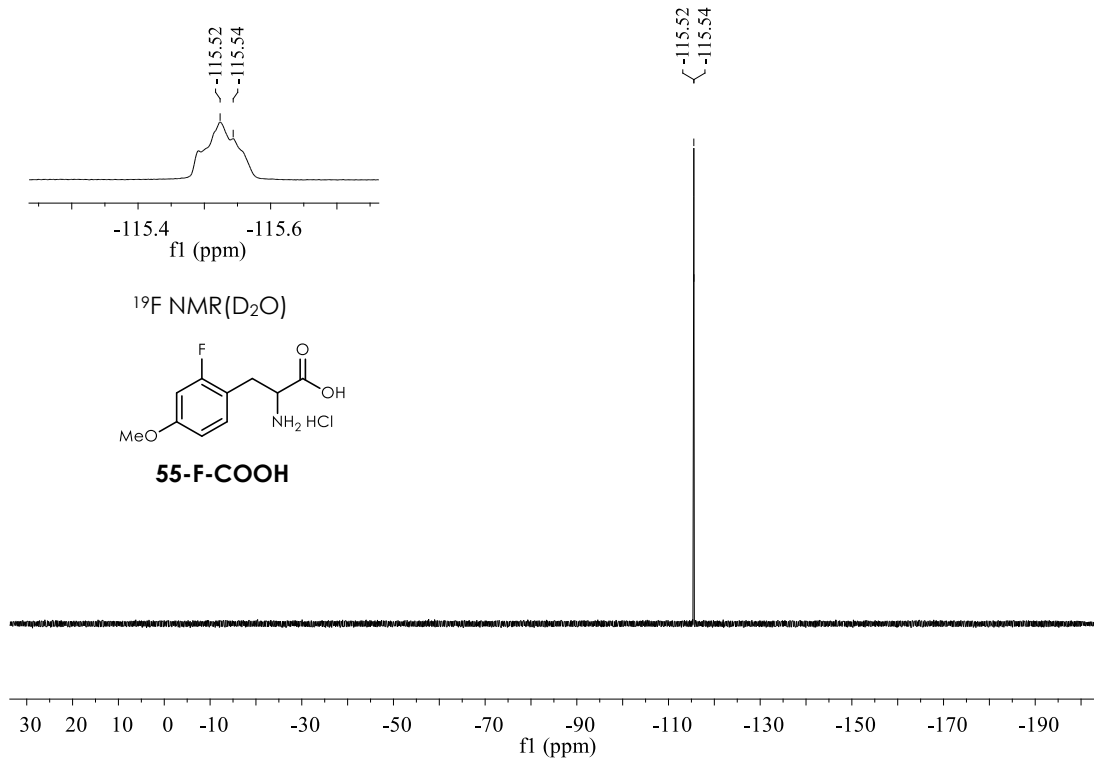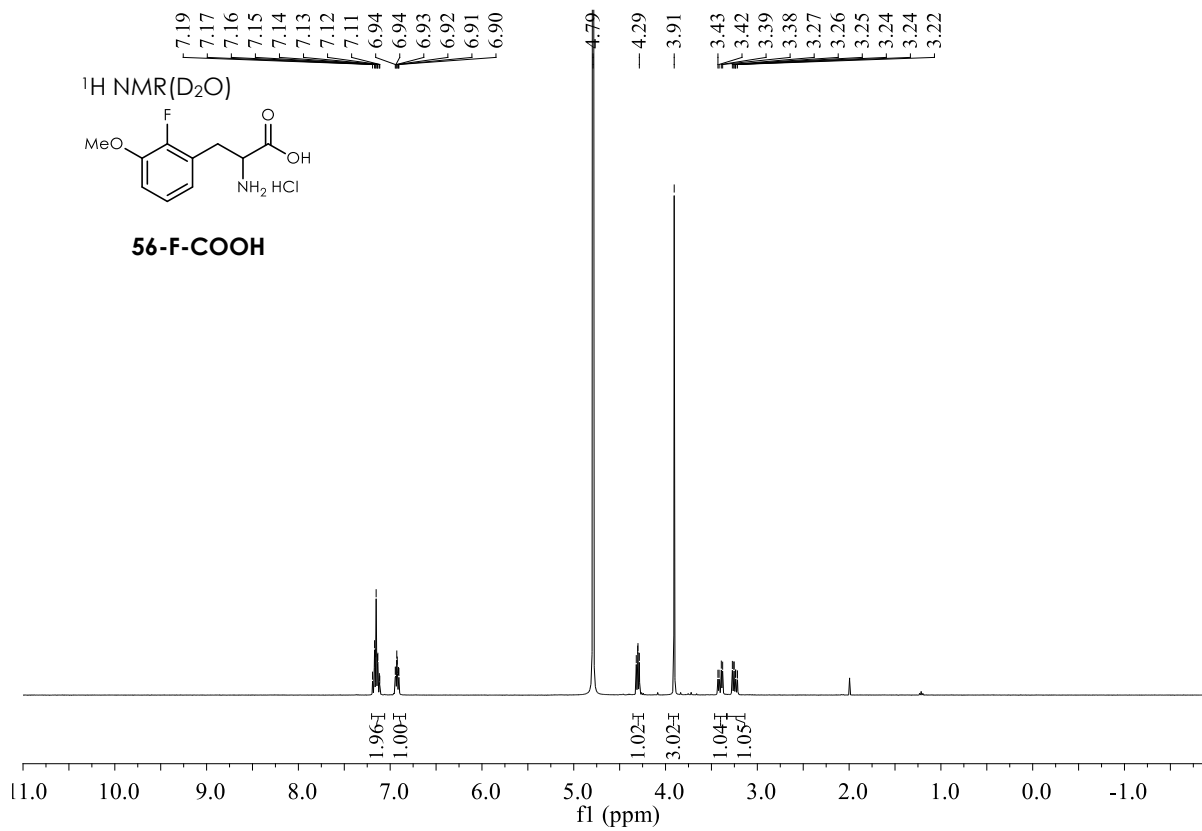

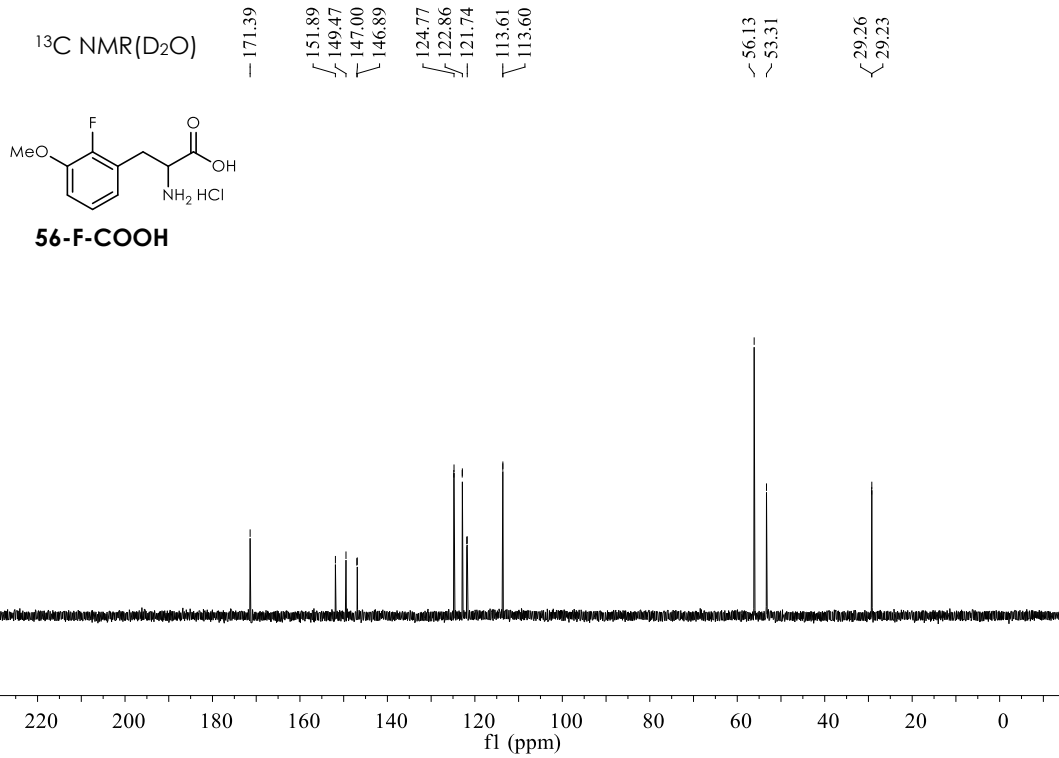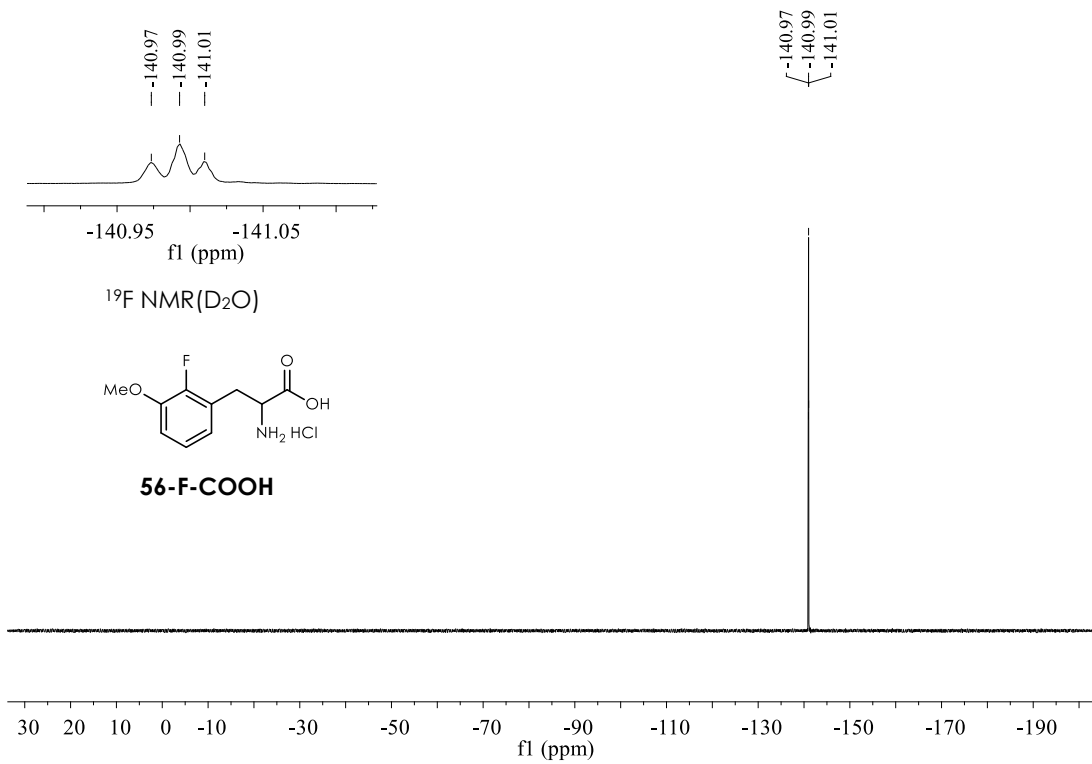

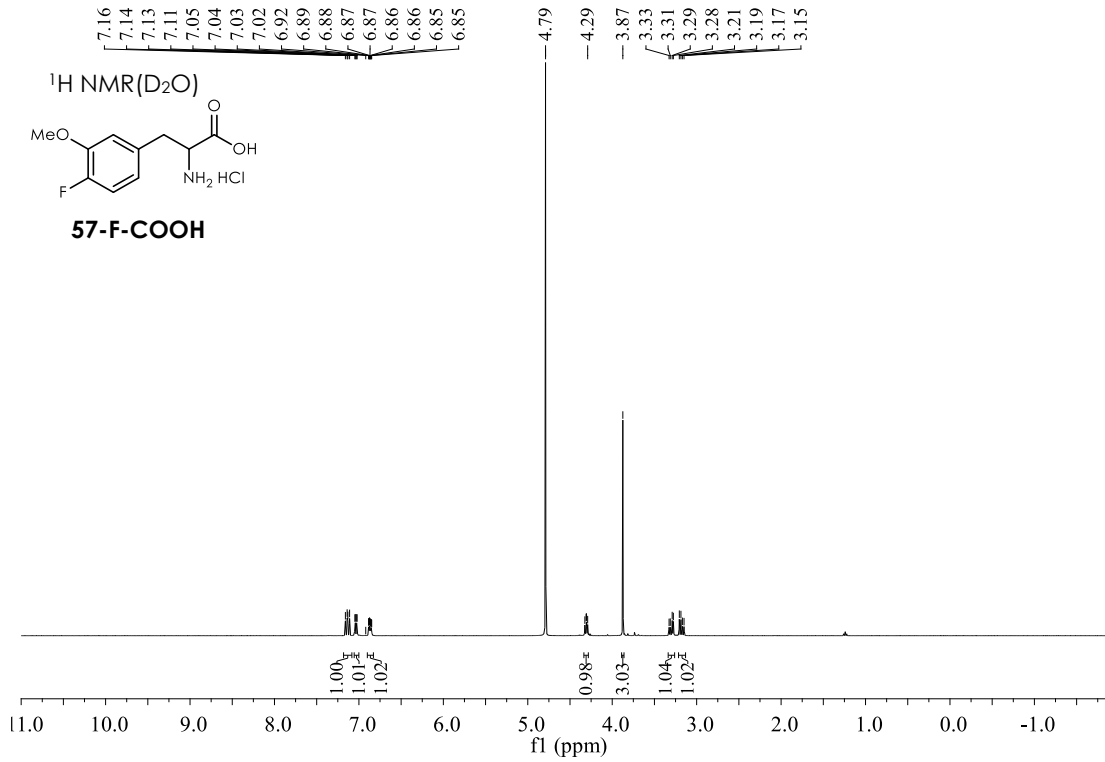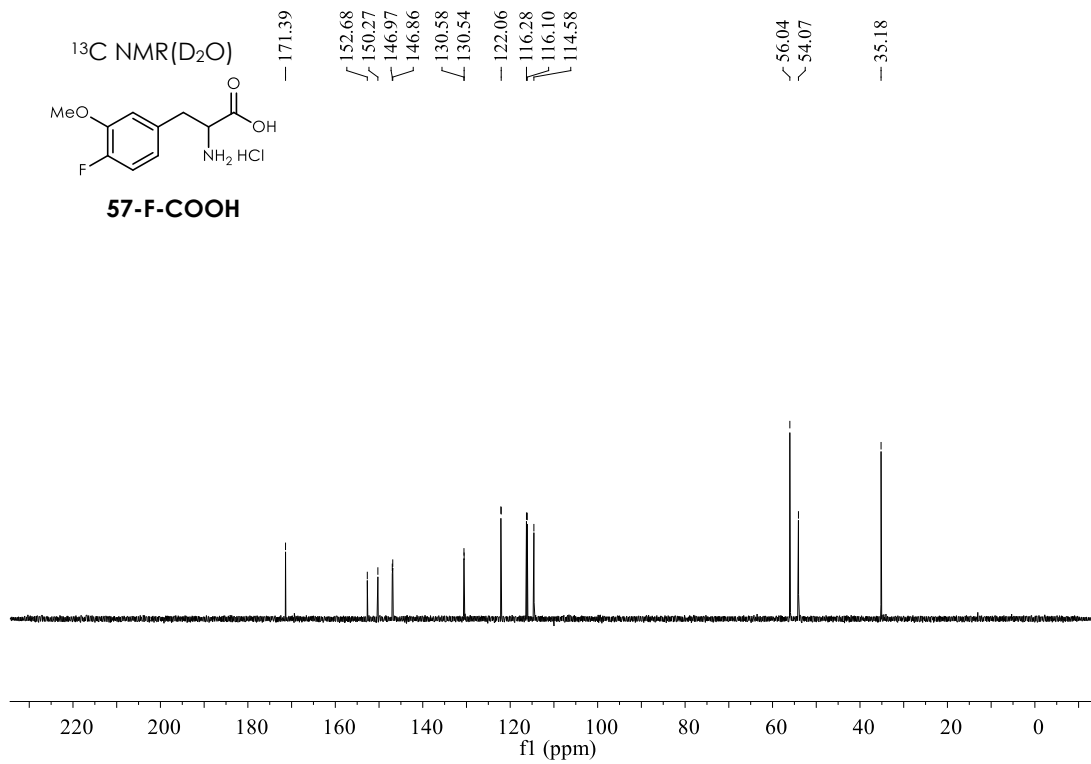

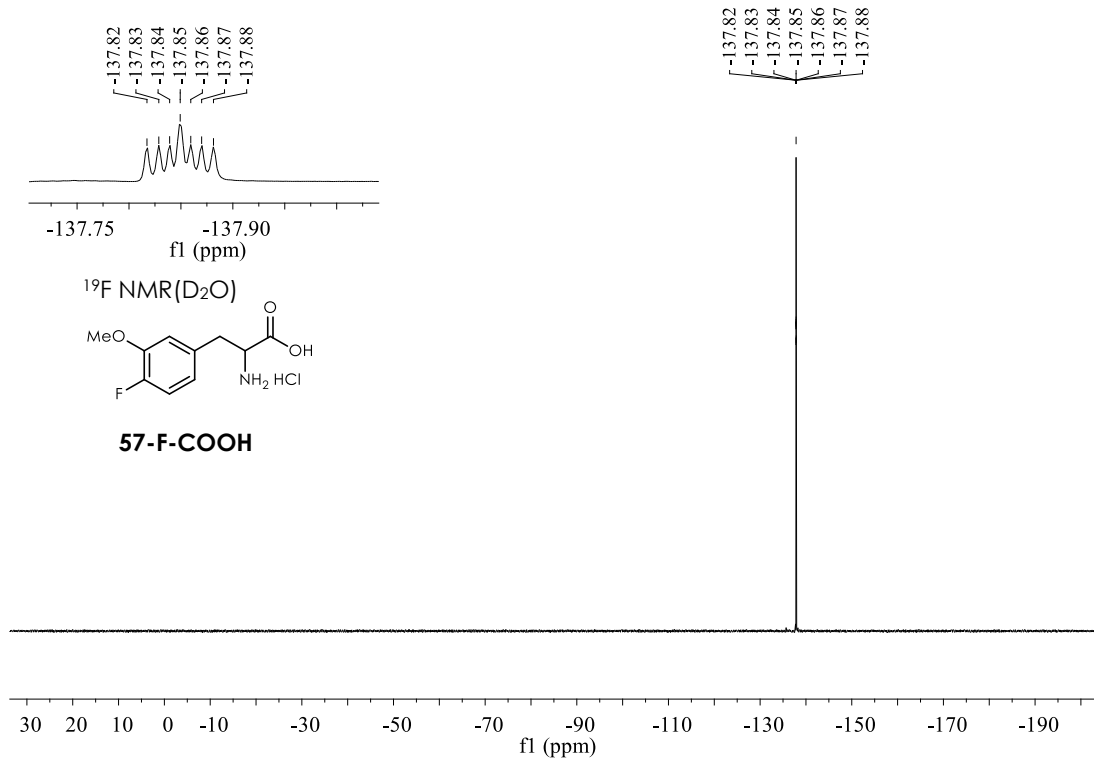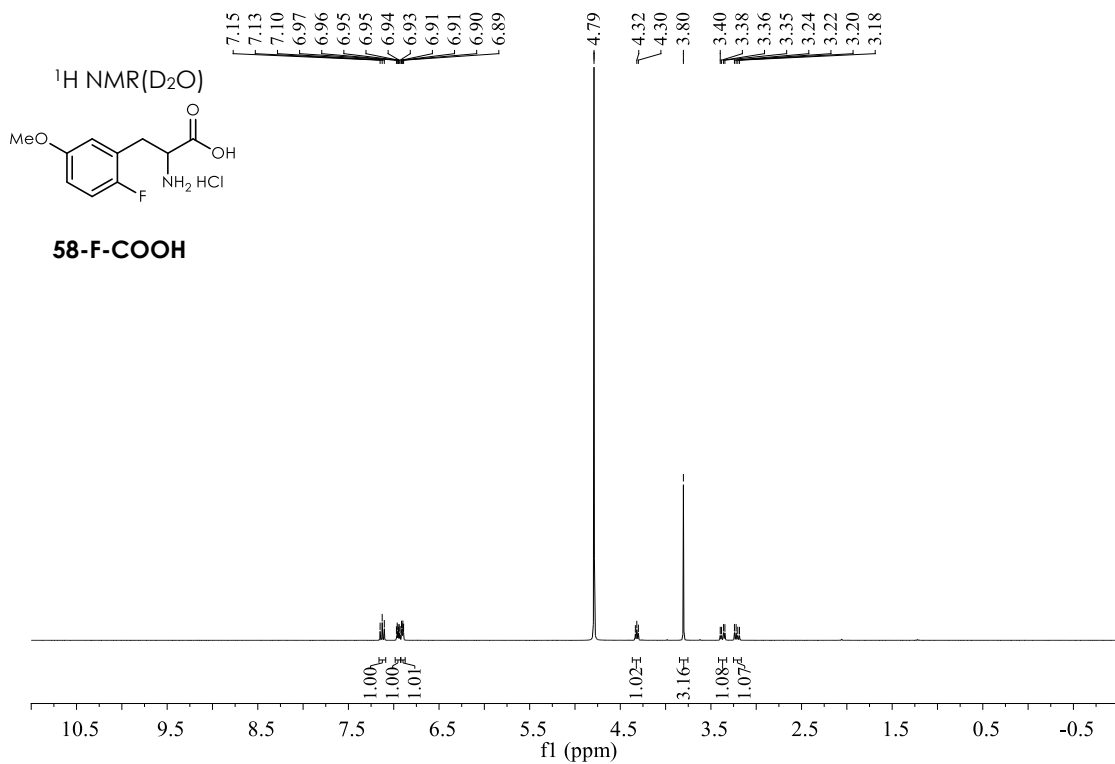

<sup>13</sup>C NMR(D<sub>2</sub>O)

171.28  
156.91  
155.09  
155.07  
154.56  
121.80  
121.63  
116.52  
116.48  
116.44  
116.20  
115.02  
114.94

55.81  
53.27

29.61

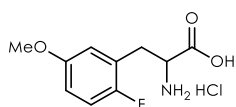

**58-F-COOH**

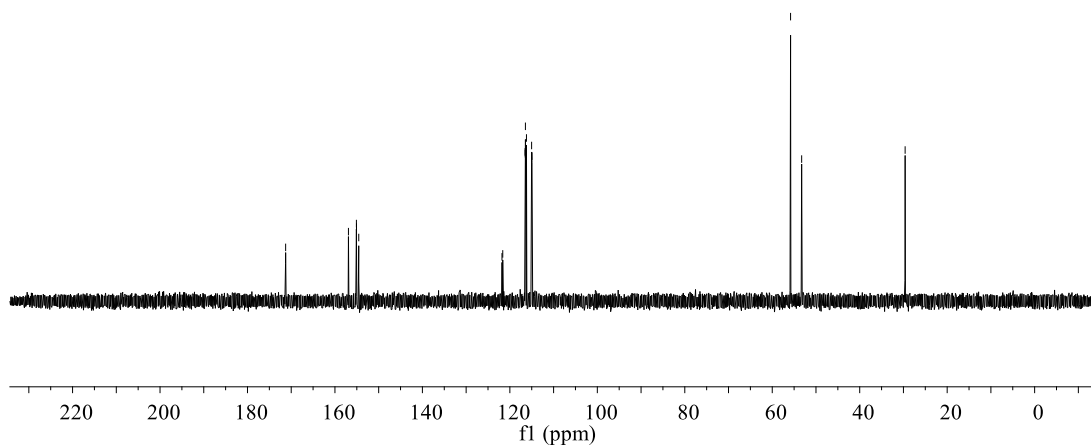

-128.14  
-128.15  
-128.16  
-128.17  
-128.18  
-128.19

-128.14  
-128.15  
-128.16  
-128.17  
-128.18  
-128.19

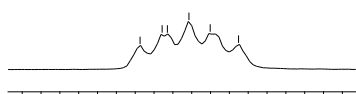

-128.16  
f1 (ppm)

<sup>19</sup>F NMR(D<sub>2</sub>O)

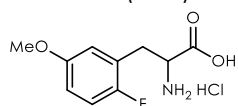

**58-F-COOH**

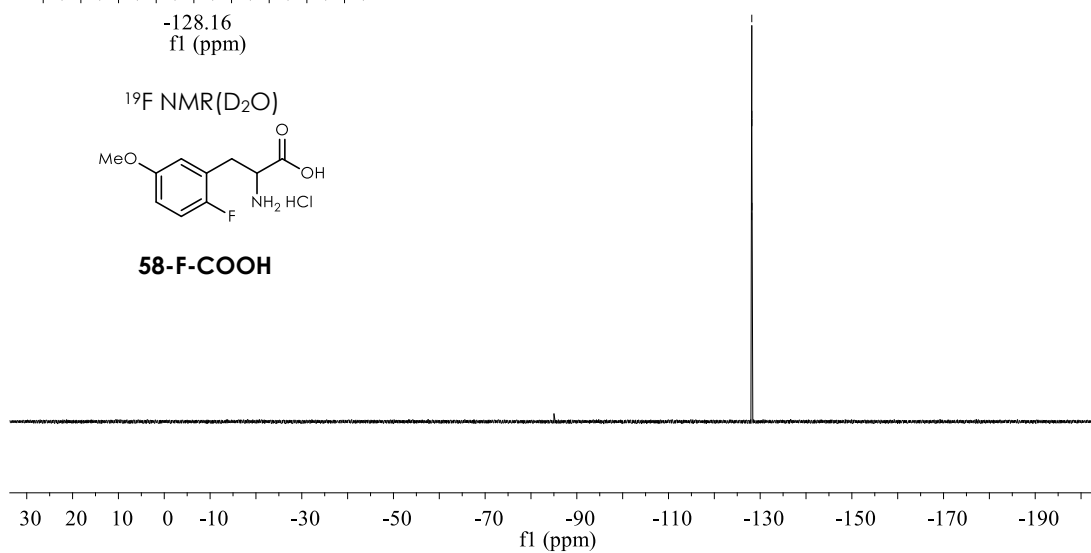

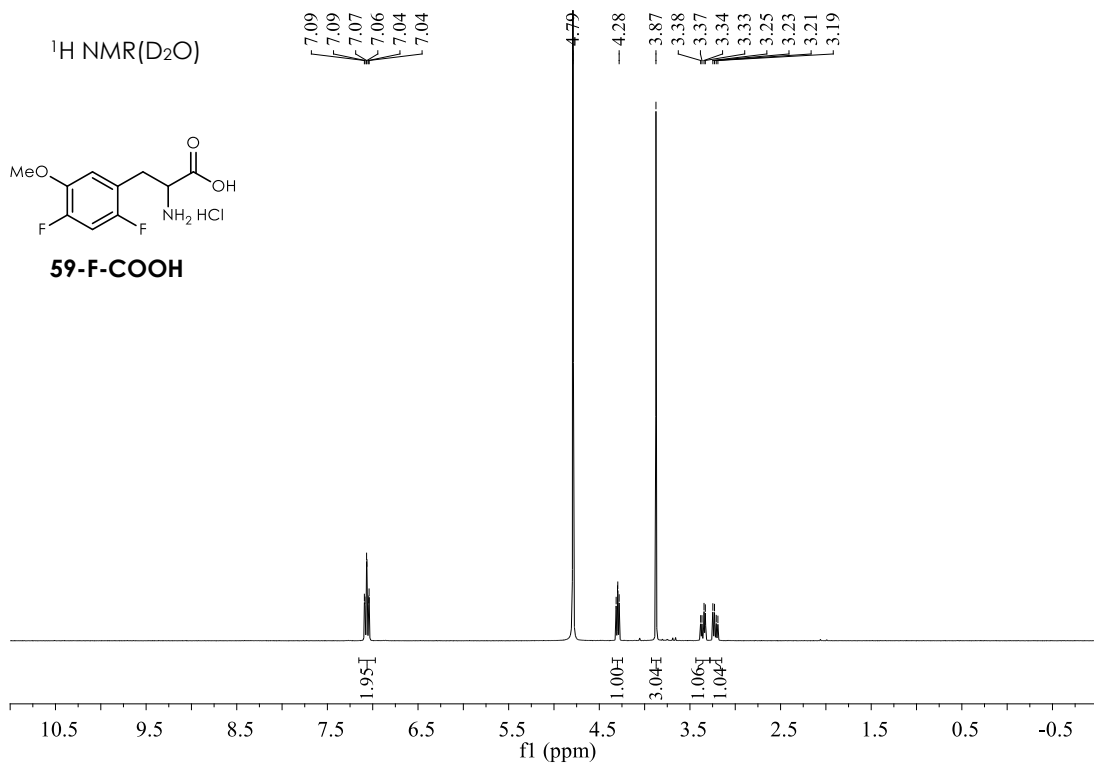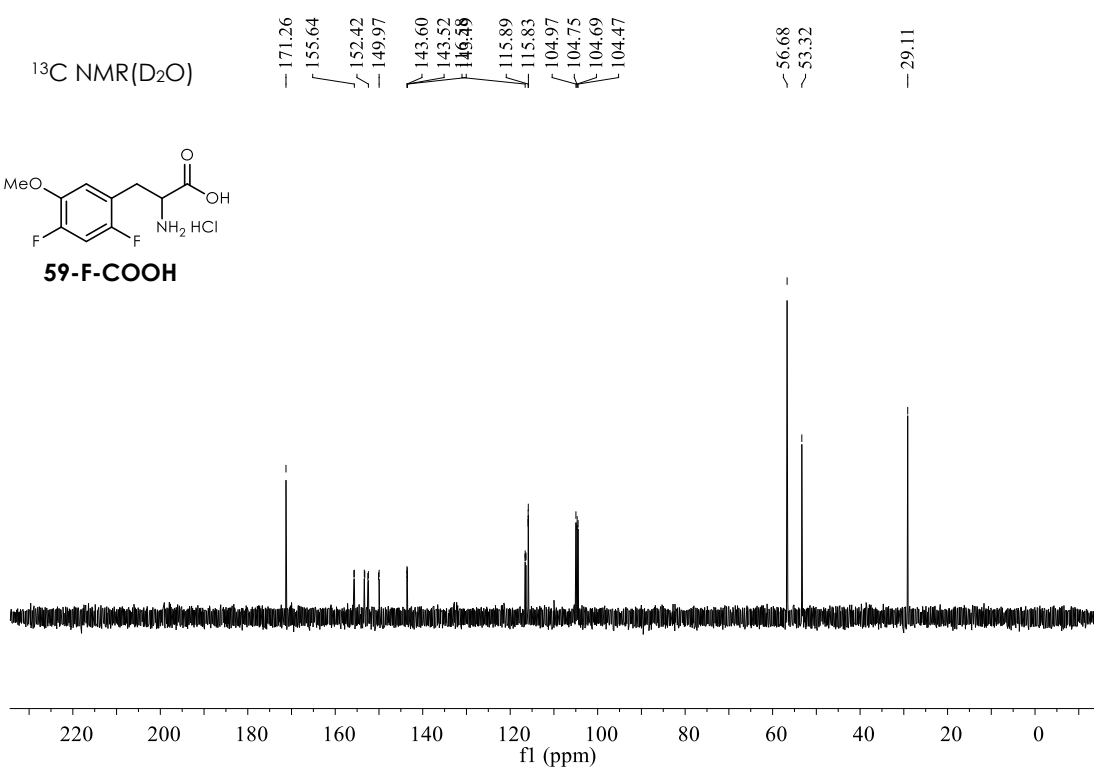

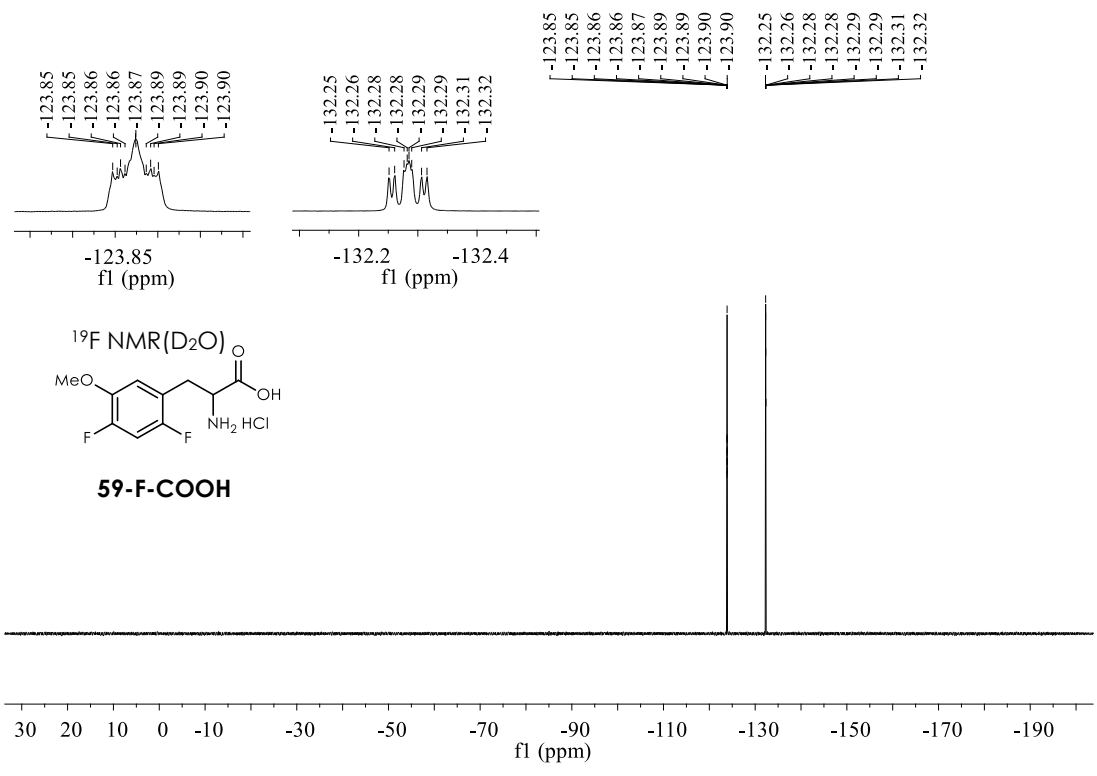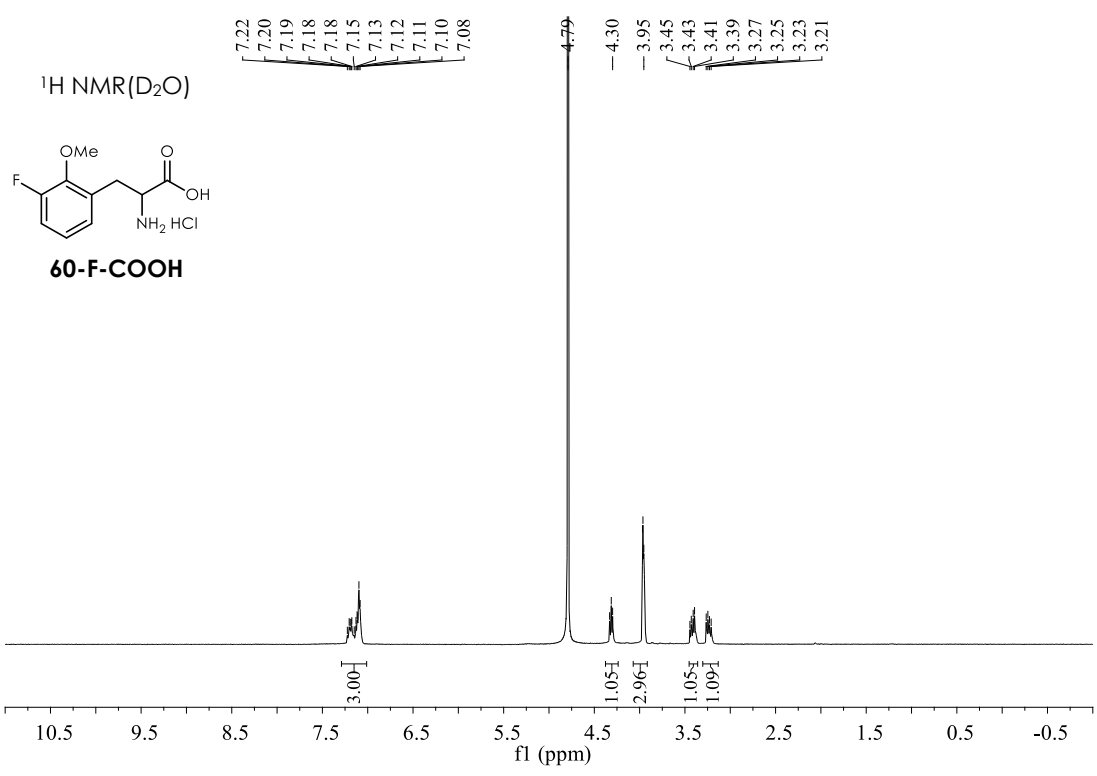

<sup>13</sup>C NMR (D<sub>2</sub>O)

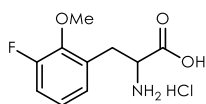

**60-F-COOH**

171.36  
156.34  
153.89  
145.39  
145.30  
128.43  
126.45  
124.48  
117.00  
116.81  
61.32  
61.26  
53.49  
30.50  
30.47

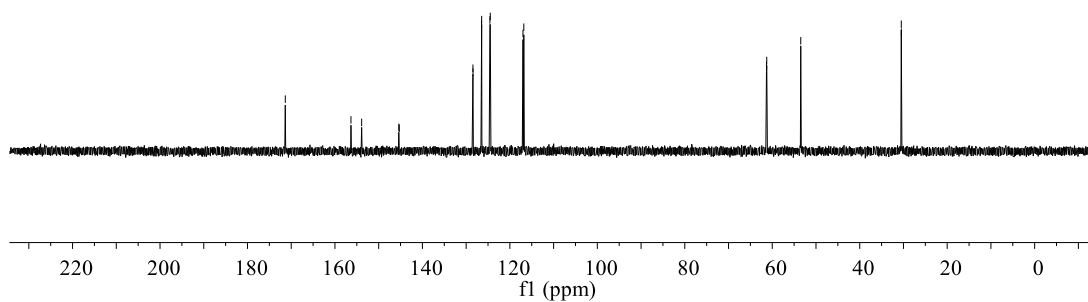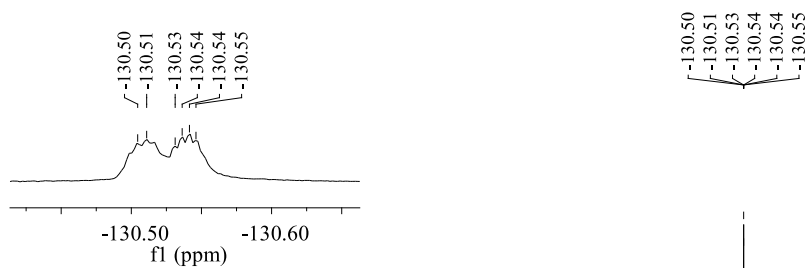

<sup>19</sup>F NMR (D<sub>2</sub>O)

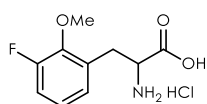

**60-F-COOH**

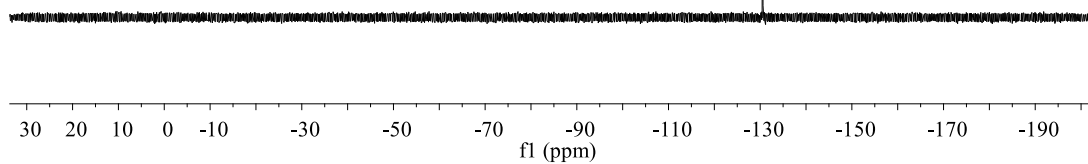



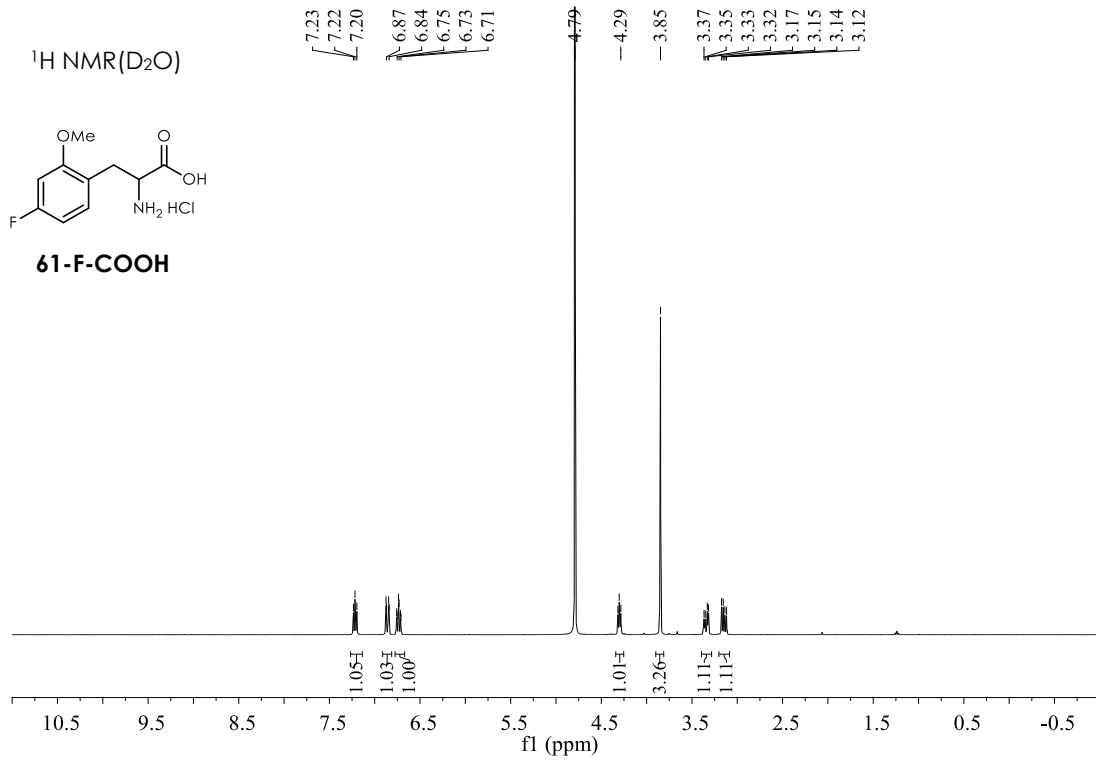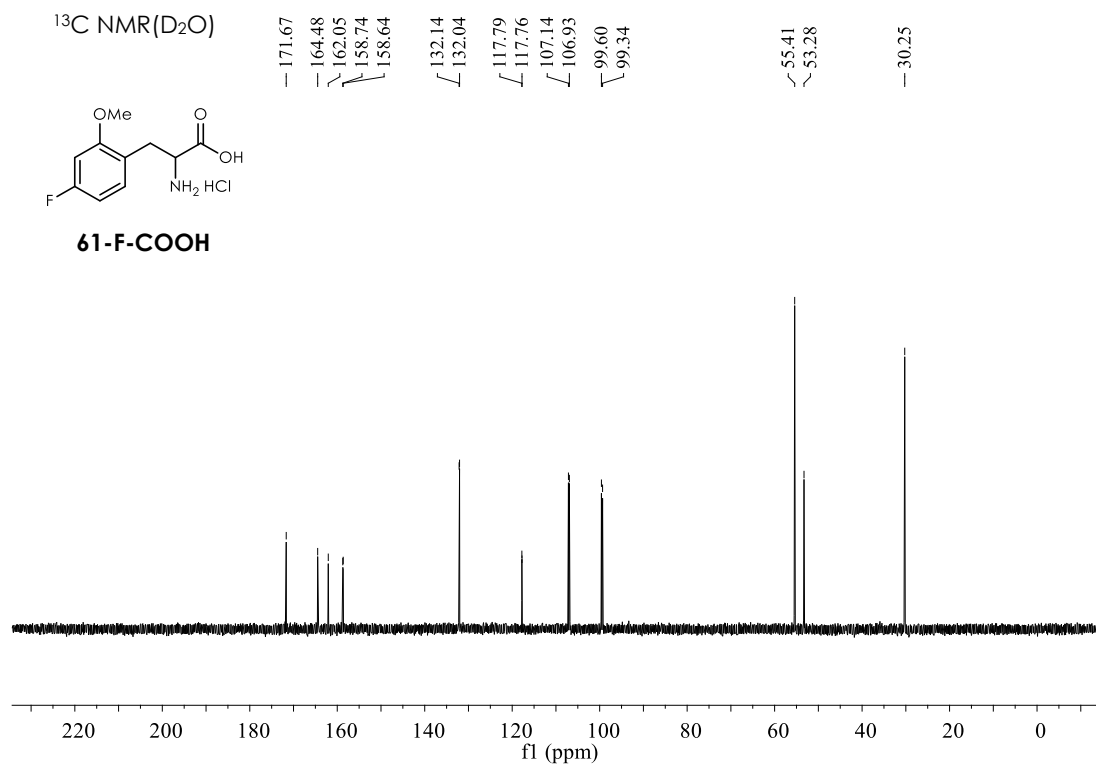

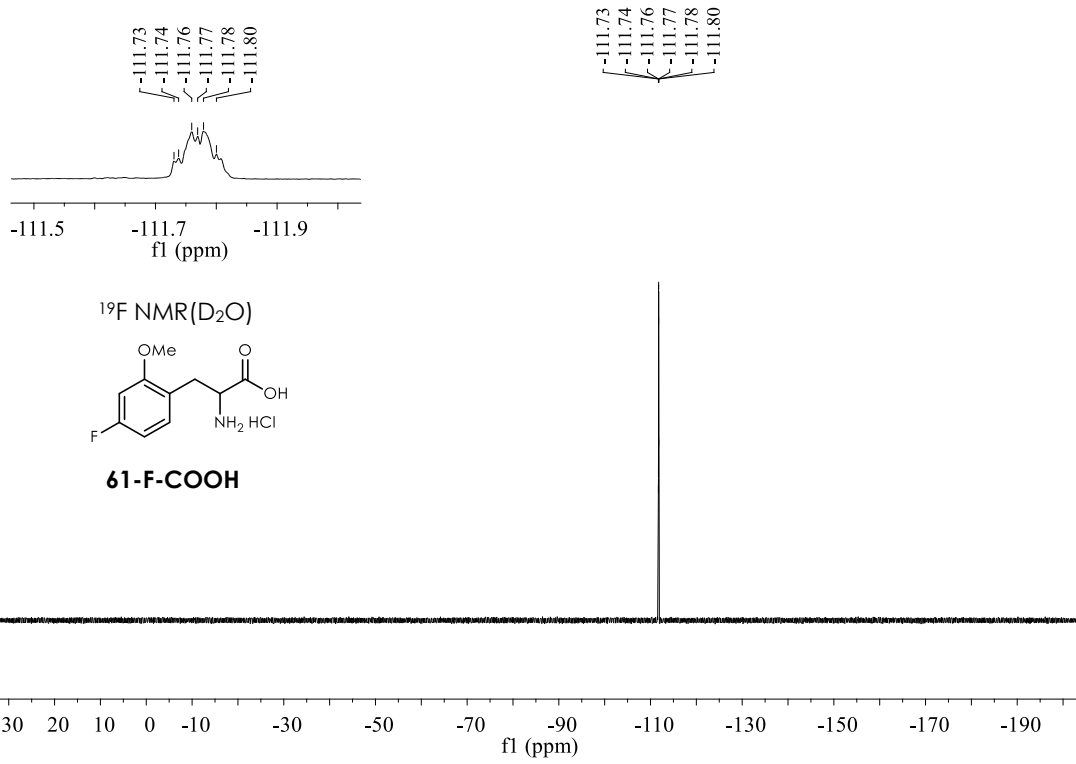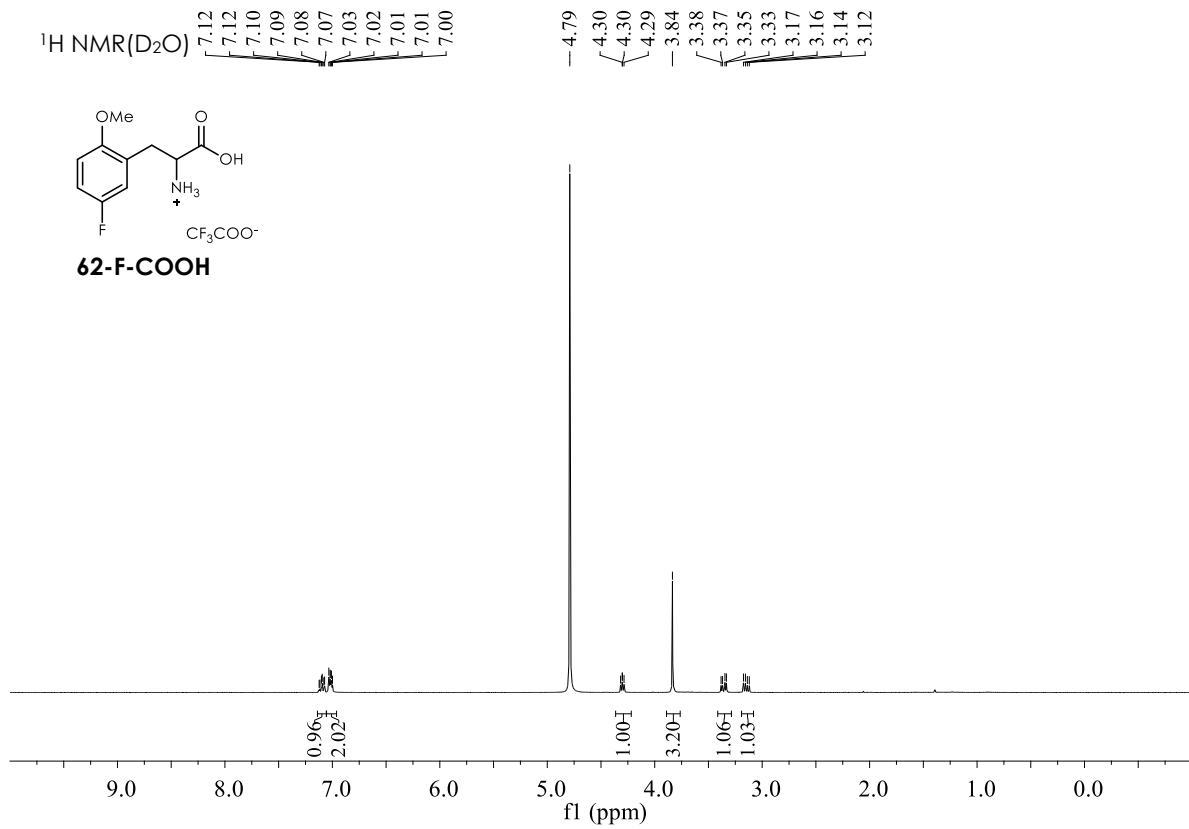

<sup>13</sup>C NMR(D<sub>2</sub>O)

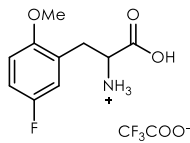

**62-F-COOH**

171.65  
163.05  
157.69  
155.33  
153.70  
153.68  
123.60  
120.59  
117.86  
117.68  
117.63  
115.56  
115.14  
114.78  
112.25  
112.16  
111.88  
55.62  
53.31  
30.71

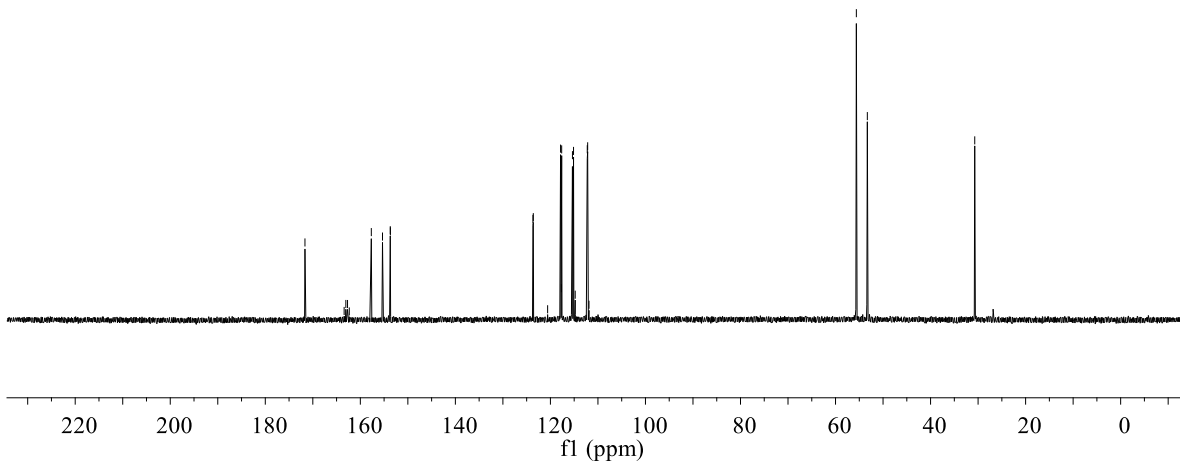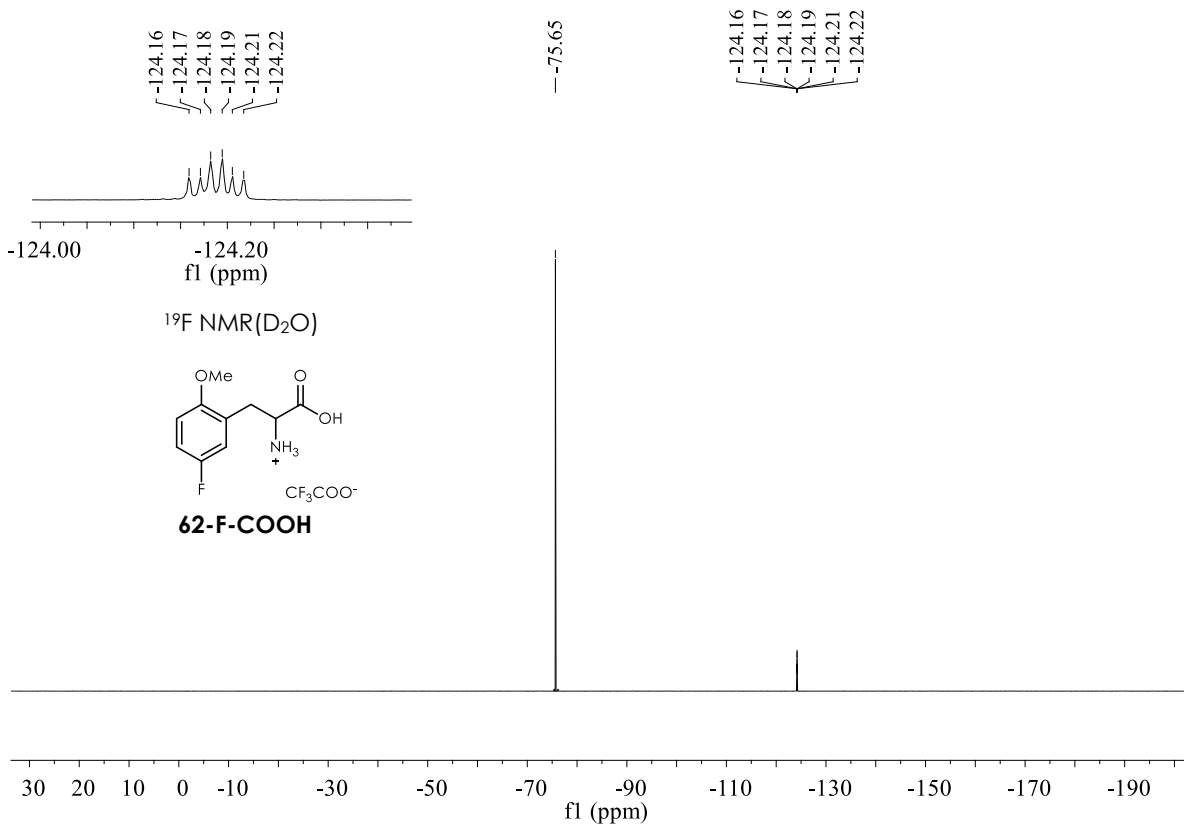

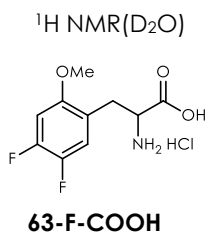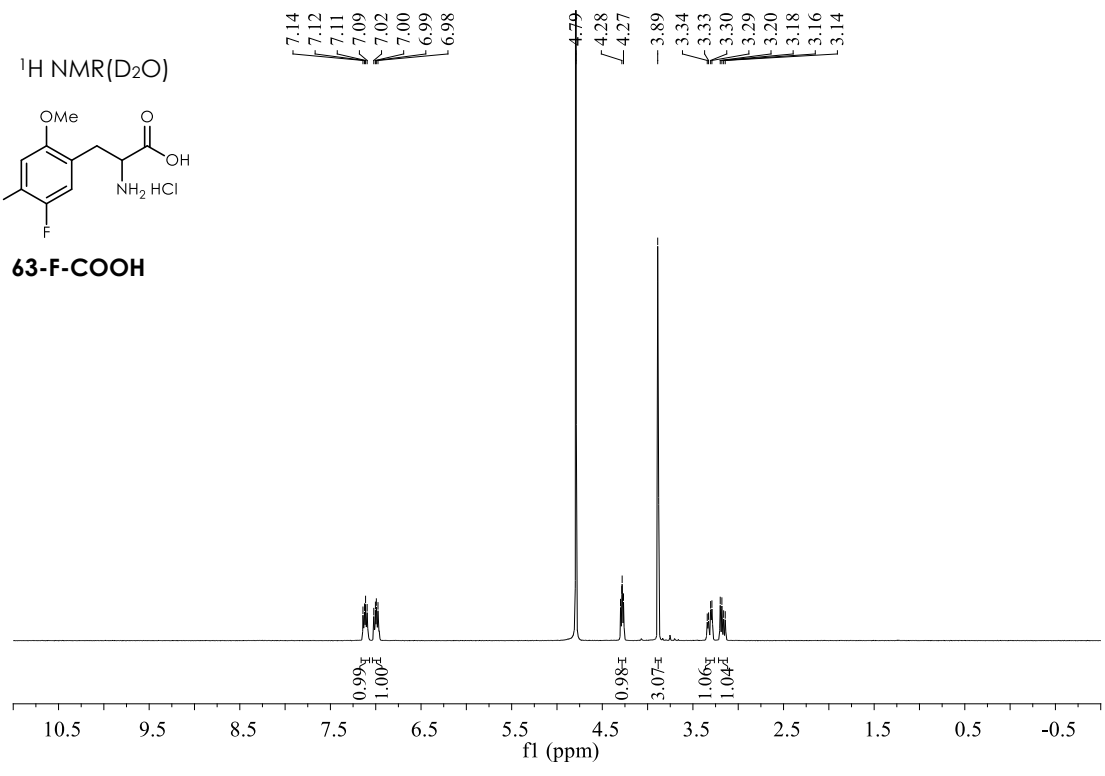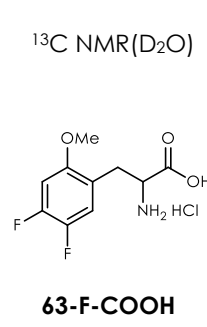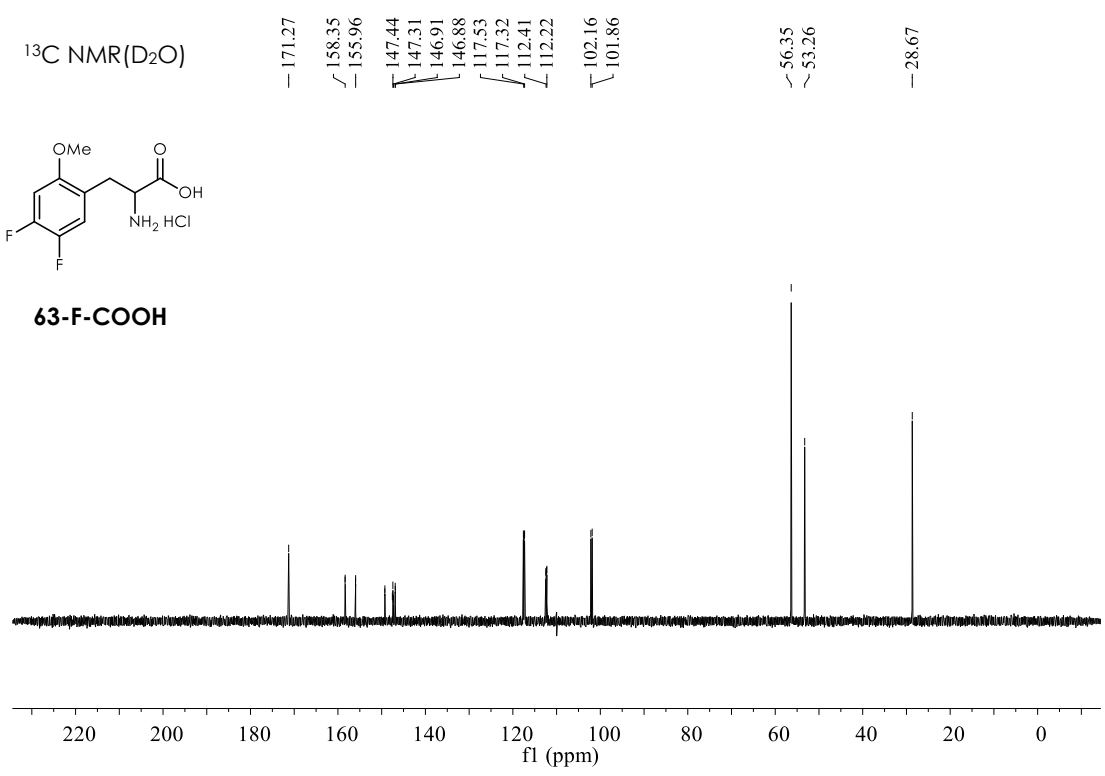

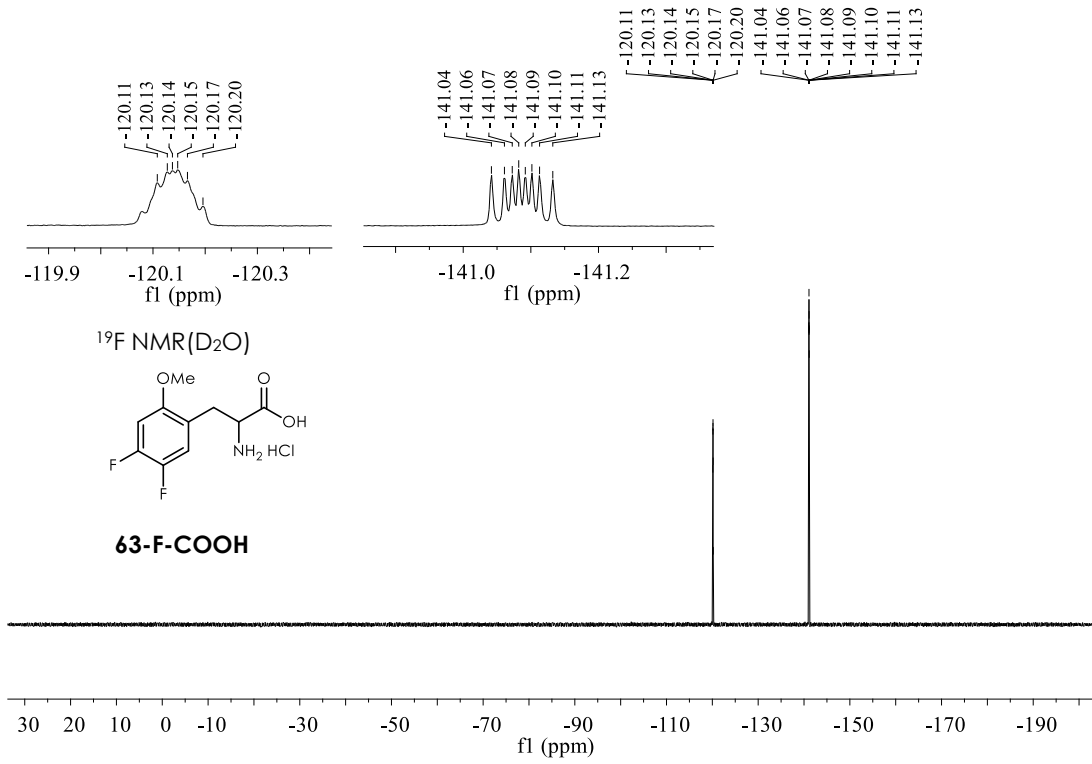

Supplement: NIHMS1843104-supplement-SI.pdf [file NIHMS1843104-supplement-SI.pdf]
